# Supplementary material for: Adjoint propagation of error signal through modular recurrent neural networks for biologically plausible learning
Source: eLife. 2026 Feb 16;15:e108237. doi: 10.7554/eLife.108237 (PMC12959881; doi:10.7554/eLife.108237)
Supplement: Appendix 1—figure 1—source data 1. [file elife-108237-app1-fig1-data1.xlsx]

## Sheet: a
Epoch	With f'(mean, min, max)	Without f'(mean, min, max)
0	[0.65764, 0.6429, 0.6694]	[0.67114, 0.6668, 0.6755]
1	[0.76944, 0.7633, 0.7739]	[0.77558, 0.7723, 0.7785]
2	[0.80806, 0.8045, 0.8112]	[0.8129000000000002, 0.8117, 0.8142]
3	[0.8223800000000001, 0.8199, 0.8248]	[0.8266600000000001, 0.825, 0.8291]
4	[0.8314199999999999, 0.8296, 0.8336]	[0.83454, 0.8333, 0.8359]
5	[0.8365199999999999, 0.8331, 0.8393]	[0.84016, 0.8396, 0.8414]
6	[0.8430200000000001, 0.8417, 0.8442]	[0.84414, 0.8425, 0.8467]
7	[0.8485799999999999, 0.8465, 0.8498]	[0.85, 0.8488, 0.8508]
8	[0.8515, 0.849, 0.8529]	[0.8529, 0.8507, 0.8542]
9	[0.8567199999999999, 0.8548, 0.8591]	[0.85738, 0.8563, 0.8588]
10	[0.8593, 0.8579, 0.861]	[0.85982, 0.8579, 0.862]
11	[0.86054, 0.8573, 0.8631]	[0.86198, 0.8607, 0.8632]
12	[0.8625, 0.8611, 0.8637]	[0.8634600000000001, 0.8615, 0.8642]
13	[0.8659399999999999, 0.8638, 0.8673]	[0.86638, 0.8652, 0.8674]
14	[0.8664799999999999, 0.8656, 0.8672]	[0.8669399999999999, 0.8651, 0.8682]
15	[0.86804, 0.8651, 0.8699]	[0.8699199999999999, 0.8682, 0.8732]
16	[0.8699200000000001, 0.8683, 0.8711]	[0.8708, 0.8683, 0.8729]
17	[0.8696999999999999, 0.8662, 0.8723]	[0.8707799999999999, 0.8683, 0.8743]
18	[0.8706799999999999, 0.8644, 0.8725]	[0.87124, 0.865, 0.8744]
19	[0.8735200000000001, 0.872, 0.8755]	[0.8737, 0.8705, 0.8766]
20	[0.8727599999999999, 0.8691, 0.876]	[0.8746600000000001, 0.8735, 0.8753]
21	[0.87402, 0.8732, 0.8755]	[0.8757399999999999, 0.8735, 0.8778]
22	[0.8741199999999999, 0.8719, 0.8759]	[0.8778600000000001, 0.8755, 0.8795]
23	[0.8745200000000001, 0.8726, 0.8782]	[0.8757000000000001, 0.8741, 0.8772]
24	[0.87672, 0.8722, 0.8798]	[0.8791, 0.8774, 0.8802]
25	[0.8760199999999999, 0.8739, 0.8789]	[0.88018, 0.878, 0.8827]
26	[0.8766599999999999, 0.8757, 0.8779]	[0.8779000000000001, 0.8758, 0.8787]
27	[0.8794599999999999, 0.8778, 0.8819]	[0.8800800000000001, 0.8795, 0.8809]
28	[0.87884, 0.8782, 0.8795]	[0.8803599999999999, 0.8791, 0.8814]
29	[0.88002, 0.8789, 0.8819]	[0.87904, 0.8761, 0.8805]
30	[0.88026, 0.8793, 0.8813]	[0.88096, 0.876, 0.8833]
31	[0.8811, 0.8798, 0.883]	[0.8821, 0.8795, 0.8841]
32	[0.8814599999999999, 0.8775, 0.8843]	[0.88232, 0.8801, 0.884]
33	[0.88134, 0.8791, 0.8825]	[0.8827999999999999, 0.88, 0.8857]
34	[0.8805799999999999, 0.875, 0.884]	[0.8843799999999999, 0.8828, 0.8868]
35	[0.88138, 0.8787, 0.8833]	[0.8830199999999999, 0.8819, 0.8842]
36	[0.8825799999999999, 0.8808, 0.8846]	[0.8836999999999999, 0.8818, 0.8854]
37	[0.883, 0.8814, 0.8844]	[0.8832999999999999, 0.8811, 0.8857]
38	[0.8836999999999999, 0.8815, 0.8862]	[0.88432, 0.8812, 0.8854]
39	[0.88476, 0.883, 0.8882]	[0.88462, 0.8814, 0.8871]
40	[0.8846399999999999, 0.8836, 0.8874]	[0.8838000000000001, 0.8824, 0.8864]
41	[0.88382, 0.8821, 0.8855]	[0.88568, 0.8824, 0.8884]
42	[0.8852800000000001, 0.8828, 0.8872]	[0.88616, 0.8847, 0.8887]
43	[0.8854799999999999, 0.8832, 0.8875]	[0.8846999999999999, 0.8826, 0.888]
44	[0.8851800000000001, 0.8823, 0.8881]	[0.8866200000000001, 0.8832, 0.8883]
45	[0.8854200000000001, 0.8828, 0.8893]	[0.8857999999999999, 0.8837, 0.8875]
46	[0.88554, 0.8835, 0.8883]	[0.8864799999999999, 0.8853, 0.8893]
47	[0.8849400000000001, 0.8833, 0.8859]	[0.8863800000000002, 0.8852, 0.8883]
48	[0.88588, 0.8831, 0.8876]	[0.8869, 0.8849, 0.889]
49	[0.88416, 0.8765, 0.8876]	[0.88738, 0.8858, 0.8886]
50	[0.8871, 0.8843, 0.8896]	[0.88636, 0.8853, 0.8878]
51	[0.8857000000000002, 0.8808, 0.89]	[0.8847799999999999, 0.8816, 0.8879]
52	[0.88636, 0.8848, 0.8895]	[0.8865400000000001, 0.8847, 0.888]
53	[0.8871, 0.8848, 0.8896]	[0.8863800000000002, 0.8834, 0.8886]
54	[0.8867200000000001, 0.8841, 0.8896]	[0.88842, 0.886, 0.891]
55	[0.8856999999999999, 0.8836, 0.8884]	[0.88576, 0.8825, 0.8881]
56	[0.8862399999999999, 0.8818, 0.8897]	[0.8877200000000001, 0.8862, 0.8898]
57	[0.88538, 0.8801, 0.8903]	[0.8866200000000001, 0.8837, 0.889]
58	[0.8876199999999999, 0.8854, 0.8908]	[0.88758, 0.8855, 0.891]
59	[0.88634, 0.883, 0.888]	[0.88602, 0.8821, 0.8882]
60	[0.88726, 0.8845, 0.8904]	[0.8873000000000001, 0.883, 0.8891]
61	[0.88656, 0.8843, 0.8879]	[0.8873599999999999, 0.8852, 0.89]
62	[0.8869399999999998, 0.8845, 0.8918]	[0.88728, 0.8842, 0.8894]
63	[0.8848600000000001, 0.8824, 0.8869]	[0.88706, 0.885, 0.8891]
64	[0.8874600000000001, 0.8864, 0.8894]	[0.8874600000000001, 0.8844, 0.8897]
65	[0.88446, 0.8821, 0.8862]	[0.8873599999999999, 0.8844, 0.89]
66	[0.88636, 0.8837, 0.8895]	[0.8869, 0.8857, 0.8898]
67	[0.88748, 0.8855, 0.8903]	[0.8869199999999999, 0.8846, 0.889]
68	[0.88568, 0.8812, 0.8886]	[0.88706, 0.8853, 0.889]
69	[0.8876, 0.8853, 0.8911]	[0.88702, 0.8834, 0.8903]
70	[0.88778, 0.8823, 0.8903]	[0.8874599999999999, 0.8846, 0.8898]
71	[0.88622, 0.883, 0.8889]	[0.8881599999999998, 0.885, 0.8898]
72	[0.88558, 0.8819, 0.8878]	[0.8873, 0.8857, 0.8907]
73	[0.8849, 0.8808, 0.8888]	[0.8852799999999998, 0.8809, 0.8882]
74	[0.88554, 0.8827, 0.8876]	[0.8862, 0.8828, 0.8889]
75	[0.8847400000000001, 0.8801, 0.8883]	[0.88566, 0.8826, 0.889]
76	[0.88514, 0.8821, 0.8891]	[0.8872199999999999, 0.883, 0.8905]
77	[0.8843799999999999, 0.8816, 0.8875]	[0.88612, 0.8835, 0.8889]
78	[0.88622, 0.8847, 0.8872]	[0.88598, 0.8849, 0.8864]
79	[0.8854000000000001, 0.8818, 0.8885]	[0.88666, 0.8828, 0.8901]
80	[0.88568, 0.883, 0.8875]	[0.8874599999999999, 0.8856, 0.889]
81	[0.88534, 0.8815, 0.891]	[0.8868599999999999, 0.8846, 0.8903]
82	[0.8859999999999999, 0.8821, 0.891]	[0.88674, 0.8848, 0.8891]
83	[0.8843, 0.8826, 0.8866]	[0.8878799999999998, 0.8863, 0.8887]
84	[0.8855999999999999, 0.8833, 0.8874]	[0.8854599999999999, 0.8804, 0.8901]
85	[0.8852, 0.8807, 0.8891]	[0.88534, 0.8824, 0.8889]
86	[0.88468, 0.883, 0.8863]	[0.8861000000000001, 0.884, 0.8873]
87	[0.8866799999999999, 0.8837, 0.8901]	[0.88616, 0.8848, 0.8868]
88	[0.88544, 0.883, 0.8888]	[0.8864599999999999, 0.8834, 0.8894]
89	[0.8853, 0.8825, 0.8876]	[0.8869, 0.8826, 0.8899]
90	[0.8855600000000001, 0.8843, 0.8874]	[0.88638, 0.8809, 0.8895]
91	[0.88526, 0.8833, 0.8872]	[0.885, 0.8816, 0.8878]
92	[0.88506, 0.8817, 0.8872]	[0.88516, 0.8804, 0.8881]
93	[0.8855999999999999, 0.8811, 0.889]	[0.8851800000000001, 0.881, 0.8879]
94	[0.88512, 0.8828, 0.8868]	[0.8853200000000001, 0.8832, 0.8874]
95	[0.8859199999999999, 0.8808, 0.8899]	[0.8830399999999999, 0.8808, 0.886]
96	[0.8867200000000001, 0.8841, 0.89]	[0.8859400000000001, 0.8844, 0.8883]
97	[0.8849400000000001, 0.8819, 0.8875]	[0.8857800000000001, 0.8822, 0.8889]
98	[0.8837800000000001, 0.8798, 0.8877]	[0.88444, 0.8815, 0.887]
