# Supplementary material for: Adjoint propagation of error signal through modular recurrent neural networks for biologically plausible learning
Source: eLife. 2026 Feb 16;15:e108237. doi: 10.7554/eLife.108237 (PMC12959881; doi:10.7554/eLife.108237)
Supplement: Appendix 2—figure 1—source data 1. [file elife-108237-app2-fig1-data1.xlsx]

## Sheet: b
Noise	Test accuracy(mean, min, max)
0	[1.0, 1.0, 1.0]
0.2	[1.0, 1.0, 1.0]
1	[1.0, 1.0, 1.0]
2	[0.998, 0.99, 1.0]
4	[0.8939999999999999, 0.88, 0.91]

## Sheet: c
Orientation (deg)	Noise:0.0	Noise:0.2	Noise:1.0	Noise:2.0	Noise:4.0
-12	2.14339e-06	3.39679e-06	1.35473e-05	0.0113833	0.0572287
-11	2.14423e-06	1.0692e-05	1.47704e-05	0.00657764	0.0581517
-10	2.15245e-06	1.51167e-05	1.73657e-05	0.00442885	0.0786487
-9	2.32085e-06	1.35449e-05	2.14428e-05	0.00438652	0.0771356
-8	3.49502e-06	1.3374e-05	2.01862e-05	0.00560931	0.110413
-7	3.65078e-06	1.33719e-05	2.17127e-05	0.00141511	0.0917934
-6	3.65176e-06	1.33718e-05	2.23397e-05	0.0225387	0.0470896
-5	3.65179e-06	1.33718e-05	2.22067e-05	0.0468328	0.160928
-4	3.75962e-06	1.33718e-05	0.000639658	0.0517993	0.171636
-3	1.16188e-05	1.33718e-05	0.0122291	0.0762306	0.206736
-2	0.000241776	1.33718e-05	0.059145	0.255619	0.322311
-1	0.0183856	1.33718e-05	0.162824	0.266127	0.422918
0	0.98612	1.33885e-05	0.416094	0.459991	0.378316
1	0.999565	0.20229	0.778587	0.61927	0.553717
2	0.999985	0.999961	0.950441	0.814908	0.600117
3	0.999993	0.999965	0.986396	0.870786	0.65603
4	0.99999	0.999965	0.999978	0.884963	0.717025
5	0.99999	0.999965	0.999984	0.968513	0.69833
6	0.99999	0.999965	0.999987	0.973807	0.806103
7	0.99999	0.999965	0.999988	0.980061	0.809257
8	0.99999	0.999965	0.999988	0.983978	0.890001
9	0.999987	0.999965	0.999988	0.997741	0.753627
10	0.999983	0.999965	0.999988	0.990415	0.83195
11	0.999968	0.999965	0.999989	0.999201	0.812084
12	0.999748	0.999965	0.999878	0.96728	0.77821
