# Supplementary material for: Adjoint propagation of error signal through modular recurrent neural networks for biologically plausible learning
Source: eLife. 2026 Feb 16;15:e108237. doi: 10.7554/eLife.108237 (PMC12959881; doi:10.7554/eLife.108237)
Supplement: Appendix 3—figure 1—source data 1. [file elife-108237-app3-fig1-data1.xlsx]

## Sheet: LN_3_TestAcc
	0.1	0.25	0.5	0.8
0.01	0.87635	0.7898	0.8837	0.679
0.1	0.8889	0.88505	0.8886	0.87355
0.25	0.88865	0.8897	0.888	0.87585
0.5	0.88875	0.88965	0.88605	0.8756
1	0.8878	0.88785	0.8819	0.8716
2	0.88885	0.88685	0.87525	0.8658
4	0.8864	0.87735	0.8669	0.8593
10	0.87325	0.86675	0.8657	0.8522

## Sheet: LN_5_TestAcc
	0.1	0.25	0.5	0.8
0.01	0.17165	0.1	0.191	0.1
0.1	0.8429	0.81415	0.88565	0.8243
0.25	0.88495	0.8827	0.8851	0.87415
0.5	0.88655	0.88675	0.8819	0.86165
1	0.88395	0.8876	0.8689	0.84395
2	0.8861	0.86935	0.85695	0.83025
4	0.87625	0.8592	0.8517	0.8201
10	0.8523	0.8542	0.8445	0.81505

## Sheet: LN_10_TestAcc
	0.1	0.25	0.5	0.8
0.01	0.1	0.1	0.1	0.1
0.1	0.1	0.1	0.1	0.1
0.25	0.1	0.1	0.8848	0.8595
0.5	0.7879	0.8785	0.87425	0.77625
1	0.8795	0.8787	0.8399	0.30405
2	0.88305	0.8509	0.80425	0.1385
4	0.8449	0.8286	0.74745	0.18485
10	0.8253	0.79945	0.68255	0.22425
