# Supplementary material for: Adjoint propagation of error signal through modular recurrent neural networks for biologically plausible learning
Source: eLife. 2026 Feb 16;15:e108237. doi: 10.7554/eLife.108237 (PMC12959881; doi:10.7554/eLife.108237)
Supplement: Appendix 3—figure 2—source data 1. [file elife-108237-app3-fig2-data1.xlsx]

## Sheet: SR0.25_β0.1_test0_Error
	Epoch_0	Epoch_1	Epoch_2	Epoch_3	Epoch_4	Epoch_5	Epoch_6	Epoch_7	Epoch_8	Epoch_9	Epoch_10	Epoch_11	Epoch_12	Epoch_13	Epoch_14	Epoch_15	Epoch_16	Epoch_17	Epoch_18	Epoch_19	Epoch_20	Epoch_21	Epoch_22	Epoch_23	Epoch_24	Epoch_25	Epoch_26	Epoch_27	Epoch_28	Epoch_29	Epoch_30	Epoch_31	Epoch_32	Epoch_33	Epoch_34	Epoch_35	Epoch_36	Epoch_37	Epoch_38	Epoch_39	Epoch_40	Epoch_41	Epoch_42	Epoch_43	Epoch_44	Epoch_45	Epoch_46	Epoch_47	Epoch_48
Neuron_0	1.12559e-06	1.22989e-06	8.40361e-07	9.36303e-07	8.49823e-07	9.68753e-07	1.58399e-06	1.45503e-06	1.59384e-06	1.44805e-06	1.58439e-06	1.36219e-06	1.00933e-06	1.06326e-06	1.31784e-06	1.37335e-06	1.40453e-06	1.25469e-06	1.79563e-06	1.58365e-06	1.09795e-06	1.2629e-06	9.62958e-07	6.98408e-07	1.3305e-06	9.94771e-07	7.36713e-07	7.43174e-07	9.05054e-07	7.95199e-07	8.6394e-07	8.76725e-07	8.0624e-07	8.12821e-07	7.52073e-07	1.1875e-06	1.4457e-06	1.37389e-06	1.19295e-06	8.59439e-07	8.06633e-07	9.38617e-07	9.26927e-07	9.31796e-07	8.98548e-07	8.22196e-07	8.39979e-07	7.81544e-07	7.45848e-07
Neuron_1	2.14384e-06	2.13892e-06	1.44274e-06	1.43035e-06	1.42725e-06	1.87321e-06	1.68529e-06	1.26255e-06	1.0046e-06	1.48739e-06	1.52471e-06	1.19627e-06	1.32953e-06	2.25573e-06	2.57725e-06	2.2916e-06	1.67468e-06	2.80917e-06	2.62008e-06	2.24549e-06	1.93801e-06	2.22955e-06	2.48297e-06	1.63834e-06	1.38589e-06	1.6431e-06	1.45984e-06	1.31651e-06	1.85094e-06	1.84646e-06	1.83824e-06	1.97743e-06	1.65788e-06	1.32183e-06	1.94714e-06	1.78393e-06	1.37285e-06	2.30932e-06	2.19322e-06	2.20369e-06	1.73734e-06	1.77234e-06	2.18583e-06	1.79423e-06	2.34042e-06	2.14404e-06	2.09975e-06	2.30256e-06	2.50484e-06
Neuron_2	2.75332e-06	1.71409e-06	2.26806e-06	2.57225e-06	2.15312e-06	1.61836e-06	1.88988e-06	2.66403e-06	2.33976e-06	3.62891e-06	3.89436e-06	3.49511e-06	3.39335e-06	3.22183e-06	2.926e-06	1.79289e-06	1.81215e-06	1.7326e-06	1.44362e-06	2.30828e-06	2.46337e-06	3.81258e-06	4.14506e-06	5.46899e-06	4.21384e-06	4.19933e-06	3.92616e-06	4.73127e-06	5.51483e-06	5.67219e-06	5.70682e-06	4.89372e-06	4.95669e-06	3.94832e-06	3.5852e-06	3.50019e-06	3.36856e-06	3.22246e-06	3.48603e-06	3.88783e-06	4.53991e-06	4.01182e-06	3.61252e-06	3.44107e-06	3.21835e-06	2.85494e-06	3.09187e-06	2.89866e-06	2.71669e-06
Neuron_3	2.45582e-06	2.02066e-06	1.4412e-06	1.44398e-06	1.32521e-06	1.60226e-06	2.04881e-06	2.97971e-06	2.20267e-06	2.36335e-06	2.09394e-06	1.70105e-06	1.8454e-06	2.01038e-06	2.08799e-06	2.11772e-06	1.88713e-06	1.9467e-06	1.74024e-06	1.24744e-06	1.66359e-06	2.1518e-06	2.78605e-06	2.51727e-06	3.11343e-06	2.44134e-06	3.16465e-06	2.86669e-06	1.98195e-06	2.1907e-06	1.75846e-06	1.74622e-06	1.803e-06	2.44465e-06	2.15577e-06	1.89836e-06	1.13463e-06	1.57484e-06	1.52516e-06	1.0978e-06	1.22935e-06	1.513e-06	1.3862e-06	1.3735e-06	1.61922e-06	1.33672e-06	1.27447e-06	1.41472e-06	1.19162e-06
Neuron_4	2.12668e-06	2.08166e-06	2.41788e-06	1.59408e-06	1.42961e-06	2.4462e-06	2.6129e-06	3.32946e-06	2.45164e-06	3.32855e-06	3.47636e-06	2.78792e-06	2.70037e-06	3.49798e-06	3.26406e-06	4.19707e-06	4.14641e-06	5.46001e-06	4.70738e-06	4.30617e-06	3.86423e-06	2.89178e-06	3.59151e-06	2.39882e-06	3.65025e-06	3.30254e-06	3.61466e-06	3.00378e-06	2.25472e-06	2.73109e-06	1.9781e-06	1.6968e-06	2.2538e-06	2.42469e-06	1.94389e-06	2.11316e-06	1.88744e-06	1.84199e-06	1.91677e-06	1.21272e-06	1.45155e-06	1.50263e-06	1.333e-06	1.5631e-06	1.61922e-06	1.38426e-06	1.35306e-06	1.17713e-06	1.10716e-06
Neuron_5	2.58455e-06	1.54895e-06	1.79229e-06	1.07742e-06	1.15717e-06	1.101e-06	1.36839e-06	1.46932e-06	1.96526e-06	2.17504e-06	2.08237e-06	2.03016e-06	2.07924e-06	1.7325e-06	1.0735e-06	1.2686e-06	1.68298e-06	1.89698e-06	8.63999e-07	9.4115e-07	1.0467e-06	1.2542e-06	1.07005e-06	1.05023e-06	1.04919e-06	1.23382e-06	1.19582e-06	9.98885e-07	1.40148e-06	9.20326e-07	8.48442e-07	1.04958e-06	1.23367e-06	1.38637e-06	1.24136e-06	1.07625e-06	8.34733e-07	1.24913e-06	1.20708e-06	1.20471e-06	1.06533e-06	1.06195e-06	1.06925e-06	1.0758e-06	1.5454e-06	1.53363e-06	1.67739e-06	1.41263e-06	1.45923e-06
Neuron_6	3.44041e-06	3.20056e-06	2.23823e-06	2.21318e-06	1.73853e-06	1.99064e-06	2.0985e-06	1.93276e-06	2.42981e-06	2.99938e-06	2.99312e-06	3.37856e-06	3.83553e-06	4.46832e-06	4.33527e-06	4.62584e-06	4.30804e-06	5.85349e-06	4.66873e-06	4.34229e-06	2.97488e-06	2.66141e-06	2.39769e-06	2.45197e-06	2.44613e-06	2.0574e-06	1.97544e-06	1.8868e-06	2.91684e-06	2.54751e-06	2.31292e-06	2.07542e-06	1.99535e-06	1.84389e-06	1.35669e-06	1.59543e-06	1.6109e-06	1.73161e-06	1.4648e-06	1.72701e-06	2.26303e-06	2.54144e-06	1.83662e-06	1.95285e-06	2.28587e-06	1.9774e-06	2.03914e-06	1.69486e-06	1.75342e-06
Neuron_7	3.95407e-06	2.7415e-06	2.28363e-06	2.05921e-06	1.60298e-06	2.59496e-06	2.69774e-06	3.2495e-06	2.94986e-06	2.40292e-06	2.64126e-06	2.13409e-06	2.28955e-06	3.07227e-06	3.72677e-06	3.87469e-06	4.20498e-06	4.23887e-06	3.86807e-06	3.4832e-06	3.08945e-06	1.81422e-06	2.06021e-06	1.46455e-06	1.83042e-06	1.57047e-06	1.67554e-06	1.70249e-06	1.23509e-06	1.40985e-06	1.40992e-06	1.72644e-06	1.70536e-06	2.38568e-06	1.69928e-06	1.17528e-06	8.98989e-07	1.37429e-06	1.27565e-06	1.60931e-06	1.45606e-06	1.71934e-06	1.77491e-06	1.79635e-06	1.8768e-06	1.6406e-06	1.8409e-06	1.83065e-06	1.28686e-06
Neuron_8	1.63613e-06	2.20539e-06	2.83182e-06	4.06811e-06	4.22549e-06	3.94794e-06	3.39219e-06	2.71077e-06	3.45652e-06	2.96061e-06	2.89798e-06	3.74308e-06	3.60084e-06	2.45038e-06	1.42783e-06	1.39351e-06	1.61717e-06	1.96917e-06	1.23226e-06	1.81143e-06	2.06631e-06	2.0975e-06	2.07935e-06	2.39774e-06	2.2966e-06	1.87643e-06	2.87768e-06	3.49502e-06	2.79133e-06	3.63842e-06	3.08204e-06	3.0134e-06	2.90212e-06	3.01965e-06	3.02961e-06	3.15635e-06	2.15869e-06	2.21588e-06	2.5824e-06	2.19919e-06	1.73468e-06	1.58925e-06	1.12468e-06	1.20351e-06	1.43408e-06	1.33561e-06	1.26459e-06	1.33638e-06	1.46335e-06
Neuron_9	1.68281e-06	1.27013e-06	8.46233e-07	9.22885e-07	6.72802e-07	9.0972e-07	8.12158e-07	9.9016e-07	1.01291e-06	1.33377e-06	9.39399e-07	6.5349e-07	6.52194e-07	7.10011e-07	1.55577e-06	1.55488e-06	1.99947e-06	1.74642e-06	3.38093e-06	3.40653e-06	3.34471e-06	2.65829e-06	2.38803e-06	2.67829e-06	2.17e-06	2.1662e-06	2.27071e-06	2.03389e-06	1.44797e-06	9.90128e-07	1.19093e-06	1.25426e-06	8.32513e-07	7.6903e-07	8.66659e-07	6.6599e-07	7.60904e-07	1.37819e-06	1.18273e-06	9.56945e-07	1.0743e-06	1.2762e-06	1.41608e-06	7.92168e-07	8.33407e-07	5.34222e-07	4.99204e-07	7.27683e-07	7.46071e-07
Neuron_10	3.68823e-06	3.74104e-06	2.85251e-06	2.40396e-06	2.64582e-06	2.93686e-06	2.21846e-06	2.37004e-06	2.21232e-06	2.64166e-06	2.4887e-06	2.65094e-06	2.76783e-06	2.99863e-06	3.16983e-06	3.02075e-06	2.71217e-06	2.48612e-06	2.13499e-06	2.36195e-06	2.41324e-06	2.69354e-06	3.20206e-06	2.92289e-06	2.43785e-06	2.32372e-06	2.51645e-06	1.96248e-06	2.34636e-06	2.09724e-06	2.29932e-06	2.52501e-06	2.38068e-06	2.13638e-06	2.75234e-06	3.44441e-06	3.39575e-06	3.82617e-06	4.01595e-06	3.14276e-06	3.37811e-06	3.85267e-06	2.89345e-06	3.0442e-06	3.26895e-06	3.15759e-06	2.94713e-06	3.44589e-06	2.9509e-06
Neuron_11	2.85813e-06	1.86052e-06	1.79906e-06	1.45188e-06	1.51856e-06	1.91454e-06	2.12188e-06	2.21176e-06	2.05922e-06	3.09082e-06	3.09607e-06	2.94299e-06	2.91655e-06	3.7215e-06	3.16086e-06	2.5852e-06	2.0584e-06	2.4088e-06	2.35876e-06	3.68336e-06	2.54708e-06	1.75964e-06	2.05781e-06	1.48696e-06	1.79053e-06	1.56049e-06	1.7692e-06	1.47979e-06	1.80097e-06	2.37829e-06	1.29025e-06	9.42856e-07	1.21744e-06	1.7675e-06	1.62521e-06	1.24658e-06	1.19846e-06	2.82785e-06	2.71463e-06	2.48754e-06	3.44965e-06	3.77941e-06	3.15008e-06	3.4216e-06	4.30167e-06	4.40127e-06	4.3973e-06	3.67278e-06	3.14546e-06
Neuron_12	4.00443e-06	3.27842e-06	3.55926e-06	2.03288e-06	2.13971e-06	2.5469e-06	2.0412e-06	2.859e-06	2.93505e-06	2.37094e-06	2.26554e-06	2.81517e-06	3.07941e-06	3.76986e-06	2.90386e-06	2.41362e-06	3.8331e-06	3.12117e-06	3.23335e-06	2.02612e-06	1.83465e-06	1.75595e-06	1.69468e-06	1.42267e-06	1.8461e-06	1.71217e-06	2.64469e-06	2.07031e-06	2.53358e-06	1.83189e-06	1.28677e-06	1.21865e-06	1.11824e-06	1.40712e-06	1.59657e-06	1.33278e-06	1.25335e-06	1.4987e-06	1.40698e-06	1.81639e-06	1.66765e-06	1.90134e-06	1.85679e-06	2.14346e-06	1.46984e-06	1.65111e-06	1.8163e-06	2.59455e-06	2.11179e-06
Neuron_13	2.30552e-06	1.87676e-06	1.7077e-06	1.61456e-06	1.41524e-06	1.45922e-06	1.94232e-06	2.41581e-06	2.69957e-06	2.84989e-06	2.48201e-06	1.79478e-06	1.58414e-06	1.7162e-06	2.59422e-06	2.26867e-06	2.87516e-06	3.51437e-06	3.71944e-06	3.39288e-06	3.31847e-06	2.05019e-06	2.17329e-06	1.64472e-06	1.75842e-06	1.37029e-06	1.38321e-06	1.19317e-06	2.9676e-06	1.91922e-06	2.57959e-06	2.37892e-06	2.44116e-06	3.50675e-06	3.24526e-06	3.5189e-06	2.89245e-06	3.28592e-06	3.2521e-06	3.11064e-06	3.45014e-06	3.98876e-06	3.21784e-06	3.16365e-06	3.43204e-06	3.70916e-06	3.67634e-06	2.49133e-06	1.9338e-06
Neuron_14	2.79087e-06	2.51196e-06	2.31215e-06	2.5166e-06	2.35356e-06	3.67818e-06	3.4292e-06	4.0323e-06	3.57119e-06	4.29241e-06	3.96462e-06	3.27876e-06	3.3113e-06	3.45183e-06	3.13957e-06	3.25818e-06	2.68074e-06	3.68133e-06	2.22006e-06	2.78678e-06	1.65695e-06	1.63085e-06	2.02517e-06	2.05463e-06	2.10296e-06	2.19116e-06	2.67924e-06	2.81301e-06	2.62968e-06	3.46965e-06	2.66847e-06	2.48627e-06	2.61257e-06	2.10548e-06	2.16238e-06	2.19885e-06	2.08667e-06	2.24845e-06	2.30308e-06	1.77237e-06	2.48686e-06	2.03103e-06	2.20294e-06	2.13441e-06	1.99901e-06	1.57773e-06	1.57834e-06	1.66768e-06	1.94289e-06
Neuron_15	3.22045e-06	2.60437e-06	2.25655e-06	2.11423e-06	1.67227e-06	1.75723e-06	1.98146e-06	2.44778e-06	2.14819e-06	2.43708e-06	2.16986e-06	1.81892e-06	1.73839e-06	2.20579e-06	1.73778e-06	1.54701e-06	1.81135e-06	2.04323e-06	1.43305e-06	1.60813e-06	2.24176e-06	1.88502e-06	2.41805e-06	1.8823e-06	2.38487e-06	2.07746e-06	2.36723e-06	1.71715e-06	1.91032e-06	1.68472e-06	1.42144e-06	1.96604e-06	2.13956e-06	1.97643e-06	2.47728e-06	3.0256e-06	3.37737e-06	3.23383e-06	3.28995e-06	3.91258e-06	3.64241e-06	3.53385e-06	4.11412e-06	4.55074e-06	4.41993e-06	3.46633e-06	3.27057e-06	3.17512e-06	4.42025e-06
Neuron_16	1.54351e-06	2.37044e-06	3.39764e-06	2.2617e-06	2.59726e-06	2.99966e-06	2.31458e-06	2.6795e-06	2.53487e-06	2.41072e-06	1.64157e-06	1.20192e-06	1.44452e-06	1.46437e-06	2.02018e-06	2.06584e-06	1.32061e-06	1.56293e-06	1.10446e-06	9.98341e-07	1.11362e-06	1.26356e-06	1.36938e-06	1.64093e-06	1.88174e-06	1.57313e-06	1.7386e-06	1.2946e-06	1.56153e-06	1.26809e-06	1.34141e-06	1.63411e-06	2.10679e-06	1.95776e-06	1.34106e-06	1.29731e-06	1.71153e-06	1.07958e-06	1.26323e-06	1.10047e-06	1.1881e-06	1.07782e-06	9.47473e-07	1.1747e-06	9.68199e-07	9.06594e-07	9.00537e-07	1.41152e-06	1.02553e-06
Neuron_17	4.662e-06	3.71155e-06	2.62576e-06	2.50334e-06	2.24213e-06	2.4117e-06	2.21891e-06	2.47036e-06	2.19873e-06	2.42565e-06	2.08213e-06	2.01546e-06	1.84923e-06	2.10719e-06	1.95083e-06	1.9959e-06	2.45917e-06	2.59705e-06	2.44425e-06	2.28846e-06	1.8633e-06	2.36765e-06	2.68477e-06	1.95837e-06	1.92511e-06	2.20919e-06	2.63768e-06	2.24072e-06	3.8721e-06	3.53193e-06	2.67828e-06	2.53224e-06	3.44107e-06	3.295e-06	3.29018e-06	2.95264e-06	2.93571e-06	3.50666e-06	3.31634e-06	2.54416e-06	2.98387e-06	3.30931e-06	2.55585e-06	2.85551e-06	3.24827e-06	2.89661e-06	2.85572e-06	3.09873e-06	3.02643e-06
Neuron_18	2.71212e-06	3.55323e-06	3.80563e-06	3.338e-06	3.78303e-06	2.4801e-06	2.71646e-06	2.21423e-06	1.69576e-06	1.2503e-06	1.03284e-06	1.39231e-06	1.73511e-06	1.58581e-06	2.05737e-06	1.92451e-06	1.42187e-06	2.09656e-06	1.64185e-06	1.72102e-06	1.37694e-06	1.13299e-06	1.36492e-06	2.04065e-06	1.68775e-06	1.91128e-06	1.6382e-06	1.24007e-06	1.78356e-06	2.22836e-06	2.23883e-06	2.07226e-06	1.92229e-06	1.12566e-06	1.08181e-06	1.19356e-06	1.38235e-06	1.38804e-06	1.21832e-06	1.10321e-06	2.23645e-06	1.66958e-06	1.48219e-06	1.35448e-06	1.95124e-06	1.15426e-06	1.18746e-06	1.33895e-06	1.28228e-06
Neuron_19	2.96746e-06	2.2983e-06	1.94745e-06	1.61517e-06	2.01462e-06	1.30158e-06	1.33939e-06	1.59283e-06	1.68747e-06	1.71247e-06	1.66497e-06	2.01914e-06	1.94365e-06	1.4511e-06	1.63016e-06	1.80852e-06	2.38487e-06	1.41957e-06	2.03228e-06	2.19405e-06	1.2278e-06	1.37016e-06	1.42434e-06	1.58238e-06	1.54182e-06	1.4374e-06	1.39582e-06	1.25393e-06	2.52342e-06	1.96886e-06	1.86116e-06	2.88227e-06	2.61021e-06	2.08494e-06	1.58468e-06	1.4064e-06	1.13067e-06	1.35684e-06	1.4607e-06	1.27101e-06	1.57247e-06	1.76011e-06	1.50439e-06	2.07391e-06	1.9469e-06	1.57393e-06	1.65743e-06	1.40361e-06	1.48775e-06
Neuron_20	3.23538e-06	3.04185e-06	2.4808e-06	2.04451e-06	2.27987e-06	1.99266e-06	2.01152e-06	2.07049e-06	1.57325e-06	1.71107e-06	1.71962e-06	1.46201e-06	1.30232e-06	1.32823e-06	1.77708e-06	1.60933e-06	2.61732e-06	2.20424e-06	1.97516e-06	1.63299e-06	1.4061e-06	1.83667e-06	1.57279e-06	1.85925e-06	1.71761e-06	1.73692e-06	2.4335e-06	1.80756e-06	3.15262e-06	1.67774e-06	1.42708e-06	1.5178e-06	2.05942e-06	2.37782e-06	1.74052e-06	1.90949e-06	1.90103e-06	2.40867e-06	2.48124e-06	1.91256e-06	2.48946e-06	2.78083e-06	1.95897e-06	2.34106e-06	2.30782e-06	1.99276e-06	1.90192e-06	2.50387e-06	2.92262e-06
Neuron_21	3.82935e-06	2.69173e-06	2.23328e-06	2.30914e-06	1.90002e-06	1.57678e-06	1.54816e-06	1.58454e-06	1.5938e-06	1.44582e-06	1.2026e-06	1.28828e-06	1.52819e-06	1.58861e-06	1.60083e-06	1.32097e-06	1.43939e-06	1.71858e-06	2.31103e-06	2.06751e-06	2.21863e-06	2.10874e-06	1.83998e-06	1.44683e-06	1.38109e-06	1.47249e-06	1.67343e-06	1.98886e-06	1.88079e-06	1.98403e-06	1.42986e-06	1.67106e-06	1.51833e-06	1.31265e-06	1.41096e-06	1.63637e-06	1.33658e-06	1.40733e-06	1.39472e-06	1.2706e-06	1.69979e-06	1.47627e-06	2.21554e-06	1.77221e-06	2.43467e-06	2.15437e-06	2.26722e-06	2.5723e-06	2.23199e-06
Neuron_22	4.11098e-06	3.13173e-06	2.43415e-06	2.90112e-06	2.2991e-06	2.28103e-06	2.10066e-06	1.76974e-06	2.20805e-06	3.22334e-06	3.07653e-06	3.20011e-06	3.39104e-06	3.58906e-06	2.74156e-06	2.73536e-06	2.40819e-06	2.84562e-06	2.84764e-06	3.04892e-06	2.26016e-06	2.71944e-06	2.59121e-06	2.89869e-06	2.48902e-06	2.2251e-06	2.24581e-06	1.55908e-06	2.42486e-06	1.91715e-06	1.78852e-06	2.07099e-06	1.59852e-06	1.29882e-06	1.28771e-06	1.44944e-06	1.61537e-06	2.0259e-06	2.09968e-06	2.53052e-06	2.64927e-06	2.09349e-06	2.84846e-06	2.84011e-06	2.5549e-06	2.25284e-06	2.33994e-06	2.56888e-06	2.1907e-06
Neuron_23	3.264e-06	2.41753e-06	2.88857e-06	3.08824e-06	2.4814e-06	1.87761e-06	1.64862e-06	2.36404e-06	1.94971e-06	3.29015e-06	3.02766e-06	2.50789e-06	2.7748e-06	2.84744e-06	3.00746e-06	1.87841e-06	1.31e-06	1.4668e-06	1.06227e-06	1.21284e-06	1.53673e-06	2.57452e-06	1.4749e-06	1.93162e-06	1.19761e-06	1.022e-06	1.0491e-06	1.06033e-06	1.27176e-06	1.05063e-06	1.17846e-06	1.14906e-06	1.06383e-06	7.43702e-07	9.05305e-07	1.06407e-06	1.05916e-06	1.3621e-06	1.24525e-06	1.24667e-06	1.97589e-06	1.65609e-06	1.5924e-06	1.89686e-06	1.76461e-06	9.44078e-07	1.25593e-06	1.06199e-06	1.05821e-06
Neuron_24	2.06995e-06	1.64831e-06	1.9107e-06	1.3721e-06	1.26788e-06	1.20685e-06	9.12193e-07	1.12002e-06	9.06557e-07	1.00236e-06	1.1149e-06	8.93146e-07	9.96305e-07	9.5338e-07	1.29817e-06	1.19101e-06	1.45072e-06	2.55439e-06	1.68918e-06	1.32781e-06	1.37658e-06	1.33776e-06	1.12299e-06	1.23034e-06	9.71317e-07	9.66255e-07	1.09476e-06	9.99991e-07	2.32514e-06	9.63656e-07	9.62034e-07	1.20728e-06	1.13422e-06	9.48653e-07	7.45855e-07	1.46434e-06	1.03657e-06	8.95381e-07	8.37892e-07	8.65459e-07	1.04576e-06	1.0733e-06	1.08853e-06	1.27524e-06	1.17856e-06	8.27849e-07	8.30889e-07	1.10555e-06	1.01817e-06
Neuron_25	5.13215e-06	2.58156e-06	1.60545e-06	1.89843e-06	1.67574e-06	1.62268e-06	1.39467e-06	1.58659e-06	1.69428e-06	1.64473e-06	1.55327e-06	1.46291e-06	1.44994e-06	1.2701e-06	1.93808e-06	2.37581e-06	2.70422e-06	2.43696e-06	1.76948e-06	1.37115e-06	1.3957e-06	1.94664e-06	1.77082e-06	1.80154e-06	1.75624e-06	1.5231e-06	1.86586e-06	2.03279e-06	2.64171e-06	1.91325e-06	1.89003e-06	2.40487e-06	2.53499e-06	1.86145e-06	1.9007e-06	1.23686e-06	1.21918e-06	1.66371e-06	1.58085e-06	1.50937e-06	1.71587e-06	1.79456e-06	1.87722e-06	1.56364e-06	1.37864e-06	1.51438e-06	1.36647e-06	1.73956e-06	1.20804e-06
Neuron_26	3.45267e-06	2.05736e-06	2.04952e-06	2.32048e-06	2.6738e-06	1.44582e-06	9.24081e-07	1.09613e-06	1.27867e-06	1.68407e-06	1.8304e-06	1.65164e-06	1.05667e-06	1.57046e-06	1.36793e-06	1.55324e-06	2.15393e-06	3.03131e-06	1.67826e-06	2.02101e-06	1.82307e-06	1.87892e-06	2.15769e-06	1.51145e-06	1.39254e-06	1.41519e-06	1.42294e-06	1.92124e-06	1.21653e-06	7.96139e-07	8.91745e-07	1.4447e-06	1.20479e-06	7.65085e-07	7.98941e-07	9.03696e-07	7.75367e-07	9.84579e-07	8.50022e-07	8.35031e-07	9.95696e-07	1.07765e-06	8.156e-07	1.18858e-06	1.32599e-06	9.92566e-07	8.88825e-07	8.58814e-07	1.00425e-06
Neuron_27	5.8638e-06	5.36095e-06	4.0311e-06	2.74158e-06	3.0494e-06	3.68382e-06	3.50103e-06	3.33397e-06	3.95054e-06	4.20655e-06	4.32478e-06	4.54878e-06	4.3074e-06	3.08877e-06	3.6687e-06	3.72608e-06	3.98406e-06	4.7912e-06	3.99002e-06	3.50165e-06	2.54935e-06	2.67428e-06	2.23219e-06	2.42162e-06	1.92589e-06	2.06155e-06	2.31731e-06	1.99771e-06	2.95699e-06	2.96897e-06	2.62052e-06	2.69592e-06	2.50268e-06	2.42177e-06	3.25531e-06	4.07114e-06	4.04144e-06	4.70767e-06	4.4703e-06	4.52441e-06	4.65161e-06	4.54013e-06	3.56715e-06	3.73615e-06	3.28344e-06	3.19711e-06	3.35678e-06	3.84438e-06	3.10338e-06
Neuron_28	3.76123e-06	3.56263e-06	2.62457e-06	2.29826e-06	2.22972e-06	2.42857e-06	2.4602e-06	2.81446e-06	2.17865e-06	2.4417e-06	2.33561e-06	2.12199e-06	2.02638e-06	1.91209e-06	2.0241e-06	1.90687e-06	2.64925e-06	3.02514e-06	1.93727e-06	1.74224e-06	1.97311e-06	2.20865e-06	2.47957e-06	2.59326e-06	2.45593e-06	2.05451e-06	2.51734e-06	2.06758e-06	2.9542e-06	2.76504e-06	2.06623e-06	2.21109e-06	2.20679e-06	1.89208e-06	2.44739e-06	2.41221e-06	2.38041e-06	2.67799e-06	2.40072e-06	3.14314e-06	3.51395e-06	3.65758e-06	2.86723e-06	2.92154e-06	2.92772e-06	2.84541e-06	2.55327e-06	3.51345e-06	3.12184e-06
Neuron_29	1.52379e-06	2.52801e-06	3.38281e-06	3.29961e-06	3.25626e-06	3.10388e-06	4.20952e-06	3.96824e-06	4.11635e-06	4.69353e-06	4.5501e-06	3.69963e-06	4.13312e-06	3.61689e-06	3.05916e-06	2.64029e-06	2.65466e-06	1.60162e-06	1.3596e-06	1.65433e-06	1.88085e-06	2.11431e-06	2.47759e-06	1.95184e-06	2.50892e-06	2.03452e-06	2.8069e-06	2.50113e-06	2.82806e-06	2.40648e-06	2.47666e-06	2.40324e-06	2.23038e-06	2.61466e-06	2.86685e-06	2.75079e-06	2.47774e-06	2.54059e-06	2.5793e-06	1.62196e-06	1.63944e-06	1.5725e-06	1.97563e-06	2.21534e-06	1.22014e-06	1.21765e-06	1.19641e-06	1.56324e-06	2.32163e-06
Neuron_30	4.71311e-06	4.45379e-06	3.31431e-06	3.09396e-06	3.15017e-06	3.00035e-06	2.87899e-06	3.16586e-06	2.64432e-06	3.13159e-06	2.79323e-06	3.21603e-06	3.10652e-06	3.60247e-06	3.6061e-06	3.4816e-06	3.08916e-06	4.15959e-06	3.18313e-06	3.05335e-06	2.48546e-06	2.73548e-06	2.98489e-06	2.74866e-06	3.2513e-06	2.68382e-06	3.33405e-06	2.78807e-06	3.35149e-06	2.79268e-06	2.29547e-06	2.8068e-06	2.80507e-06	2.7003e-06	2.70346e-06	2.77809e-06	2.70174e-06	2.59815e-06	2.36662e-06	2.47839e-06	3.0152e-06	3.24018e-06	3.09761e-06	2.44707e-06	2.94104e-06	2.71315e-06	2.53009e-06	2.64324e-06	2.82501e-06
Neuron_31	2.30394e-06	1.98922e-06	2.16925e-06	2.59279e-06	2.74826e-06	3.43329e-06	2.91191e-06	3.14546e-06	3.03626e-06	3.03449e-06	3.06582e-06	3.23092e-06	2.4676e-06	2.45958e-06	2.72588e-06	2.48009e-06	2.7147e-06	2.2212e-06	3.42018e-06	3.0122e-06	2.61398e-06	2.8102e-06	2.32932e-06	2.44628e-06	1.82015e-06	1.59316e-06	1.21981e-06	1.09805e-06	1.99423e-06	1.43091e-06	1.29054e-06	1.25451e-06	1.16191e-06	1.59878e-06	1.53919e-06	1.36441e-06	1.51292e-06	2.3654e-06	2.31525e-06	2.17225e-06	1.73103e-06	1.56737e-06	2.31779e-06	1.85689e-06	1.6006e-06	1.23505e-06	1.16206e-06	1.57185e-06	1.9027e-06
Neuron_32	3.47236e-06	2.30824e-06	1.8087e-06	1.41111e-06	1.51187e-06	1.63575e-06	1.78723e-06	2.56005e-06	1.85128e-06	2.76702e-06	3.26031e-06	4.13103e-06	4.24859e-06	3.42655e-06	3.32939e-06	1.91285e-06	1.42779e-06	1.84164e-06	1.5729e-06	1.58624e-06	1.33113e-06	1.44254e-06	1.63813e-06	1.70392e-06	1.388e-06	1.31998e-06	1.33862e-06	1.19863e-06	2.15677e-06	3.0735e-06	2.81116e-06	2.50264e-06	3.08215e-06	2.65879e-06	3.36588e-06	4.56876e-06	5.21491e-06	4.50385e-06	4.5768e-06	4.29483e-06	4.24807e-06	3.86767e-06	3.55209e-06	3.69707e-06	2.90884e-06	2.26198e-06	2.38484e-06	2.24568e-06	2.23023e-06
Neuron_33	6.29096e-06	2.04995e-06	1.83153e-06	1.53554e-06	1.49188e-06	1.76063e-06	1.29584e-06	1.63993e-06	1.39094e-06	2.09017e-06	1.96346e-06	1.33967e-06	1.22608e-06	1.79224e-06	2.15638e-06	2.91468e-06	2.04852e-06	3.44049e-06	2.23168e-06	2.6631e-06	2.43108e-06	2.43507e-06	2.01948e-06	1.77593e-06	1.79502e-06	1.39673e-06	1.65676e-06	1.51416e-06	1.70587e-06	1.26291e-06	1.37334e-06	1.61166e-06	1.55959e-06	1.91994e-06	2.29457e-06	2.39673e-06	2.25615e-06	2.74809e-06	2.59375e-06	2.29297e-06	2.1466e-06	2.35973e-06	2.05554e-06	2.42665e-06	3.10139e-06	3.62661e-06	3.40799e-06	2.50027e-06	2.2792e-06
Neuron_34	2.36895e-06	2.86242e-06	2.5503e-06	1.10455e-06	1.31975e-06	1.28894e-06	1.02261e-06	1.67829e-06	1.71384e-06	1.52263e-06	9.8443e-07	1.96221e-06	1.77011e-06	1.32315e-06	1.63368e-06	1.1363e-06	1.55026e-06	1.74444e-06	2.80362e-06	1.83199e-06	2.9764e-06	2.86312e-06	1.73144e-06	2.1258e-06	2.30894e-06	2.02102e-06	2.57578e-06	2.63937e-06	3.5197e-06	4.15864e-06	4.50518e-06	4.97196e-06	3.95265e-06	3.798e-06	4.05811e-06	4.02664e-06	2.93425e-06	2.63892e-06	2.46681e-06	2.25643e-06	1.60677e-06	1.84766e-06	1.02923e-06	1.61436e-06	1.96633e-06	2.45154e-06	2.27344e-06	2.61464e-06	2.14882e-06
Neuron_35	3.12918e-06	2.3855e-06	2.15604e-06	2.7275e-06	2.37713e-06	2.73399e-06	2.45179e-06	2.24949e-06	1.83111e-06	1.80331e-06	1.80066e-06	1.71056e-06	1.64127e-06	1.75029e-06	2.36106e-06	3.08764e-06	2.46146e-06	2.33918e-06	2.1535e-06	2.17947e-06	2.29427e-06	2.64014e-06	2.66528e-06	2.05238e-06	1.91438e-06	1.38563e-06	1.79589e-06	1.20641e-06	3.39543e-06	1.89625e-06	1.472e-06	1.94367e-06	2.02947e-06	1.16124e-06	1.63528e-06	1.25622e-06	1.92757e-06	1.52106e-06	1.719e-06	1.39756e-06	1.62007e-06	1.22152e-06	1.49683e-06	1.5842e-06	1.60816e-06	1.25113e-06	1.33018e-06	1.57681e-06	1.64582e-06
Neuron_36	2.74926e-06	2.21942e-06	1.85222e-06	2.10788e-06	1.5719e-06	1.33614e-06	1.34081e-06	1.53907e-06	1.24562e-06	1.74314e-06	1.75528e-06	1.4475e-06	1.27826e-06	1.5354e-06	1.6607e-06	1.90401e-06	2.0078e-06	2.1543e-06	1.93105e-06	2.49244e-06	1.70299e-06	2.09501e-06	1.74269e-06	1.93551e-06	1.66592e-06	1.9058e-06	2.00295e-06	1.64777e-06	3.14998e-06	2.24164e-06	1.8402e-06	1.96761e-06	1.96052e-06	1.21991e-06	1.27983e-06	1.7814e-06	1.40515e-06	1.56134e-06	1.57943e-06	1.24374e-06	1.26117e-06	1.29536e-06	1.12036e-06	1.21018e-06	1.55702e-06	1.15922e-06	1.24937e-06	1.65892e-06	1.56552e-06
Neuron_37	2.4296e-06	2.08126e-06	1.65731e-06	1.6703e-06	1.39234e-06	2.38799e-06	2.92153e-06	3.43145e-06	2.98044e-06	2.55875e-06	2.43902e-06	2.54349e-06	2.90201e-06	2.20461e-06	1.50573e-06	1.43751e-06	1.60749e-06	2.14198e-06	1.5289e-06	2.20937e-06	1.48444e-06	1.94971e-06	2.47684e-06	2.34821e-06	1.9993e-06	2.41326e-06	2.59653e-06	3.00612e-06	3.67879e-06	3.76897e-06	3.63839e-06	3.67069e-06	3.77436e-06	5.18263e-06	5.25899e-06	4.63023e-06	4.81332e-06	5.36442e-06	5.88772e-06	4.949e-06	4.72693e-06	4.44427e-06	4.75994e-06	3.71569e-06	3.47465e-06	3.44307e-06	3.56695e-06	3.5911e-06	3.27447e-06
Neuron_38	1.51101e-06	4.23858e-06	4.93321e-06	4.90975e-06	2.93591e-06	2.58864e-06	2.94275e-06	2.81836e-06	1.78398e-06	1.45958e-06	1.81863e-06	1.86881e-06	2.04679e-06	1.47237e-06	1.34848e-06	8.60106e-07	1.23632e-06	1.2389e-06	7.88081e-07	9.15781e-07	1.13255e-06	6.74009e-07	8.31463e-07	9.48042e-07	9.03636e-07	9.19059e-07	1.01127e-06	8.32841e-07	1.79909e-06	8.35151e-07	8.78841e-07	1.00288e-06	1.59141e-06	1.46464e-06	1.50236e-06	9.0906e-07	1.73575e-06	1.53118e-06	1.31395e-06	1.52546e-06	2.52005e-06	2.73365e-06	1.78599e-06	2.00176e-06	1.98567e-06	2.01082e-06	1.90419e-06	2.55477e-06	2.30467e-06
Neuron_39	3.80006e-06	2.16371e-06	1.77492e-06	1.75051e-06	1.64356e-06	1.43413e-06	1.63596e-06	1.59445e-06	1.64837e-06	1.60733e-06	1.43497e-06	1.89786e-06	2.14955e-06	2.08042e-06	1.65015e-06	1.42085e-06	2.17334e-06	2.50472e-06	1.35593e-06	1.30589e-06	1.24186e-06	1.50946e-06	1.49722e-06	2.1742e-06	1.28032e-06	1.69261e-06	2.17415e-06	1.13112e-06	2.73511e-06	1.82793e-06	1.50001e-06	1.55547e-06	1.57234e-06	1.69533e-06	1.62466e-06	2.20831e-06	2.74998e-06	2.16854e-06	2.2901e-06	2.37137e-06	2.97996e-06	2.70805e-06	1.84134e-06	1.6824e-06	1.73739e-06	1.76072e-06	1.62688e-06	1.60578e-06	1.85204e-06
Neuron_40	2.34413e-06	2.79306e-06	3.8287e-06	3.69938e-06	3.91964e-06	2.99274e-06	3.0923e-06	2.89894e-06	2.59033e-06	1.43465e-06	1.38561e-06	1.35695e-06	1.35332e-06	1.77504e-06	1.42868e-06	1.47967e-06	1.44517e-06	2.38369e-06	1.68623e-06	1.43011e-06	1.57258e-06	1.47546e-06	1.53995e-06	1.62381e-06	1.5495e-06	1.57589e-06	1.665e-06	1.42504e-06	2.19706e-06	1.63643e-06	1.61542e-06	1.50839e-06	1.7696e-06	1.60272e-06	1.52898e-06	1.35586e-06	1.10695e-06	1.36131e-06	1.25718e-06	1.41081e-06	1.41874e-06	1.43012e-06	1.26845e-06	1.79042e-06	1.45373e-06	1.3619e-06	1.33954e-06	3.03166e-06	2.3765e-06
Neuron_41	2.86884e-06	2.78786e-06	2.00474e-06	1.80634e-06	1.65653e-06	1.68988e-06	1.56948e-06	1.59179e-06	1.83634e-06	2.24578e-06	2.2462e-06	1.86287e-06	1.92064e-06	1.92732e-06	1.60441e-06	1.59255e-06	1.80745e-06	2.28068e-06	2.11951e-06	2.40135e-06	2.59107e-06	2.66108e-06	2.74566e-06	2.93753e-06	2.73737e-06	2.57953e-06	2.76222e-06	2.63616e-06	2.53555e-06	3.26908e-06	3.25115e-06	3.92875e-06	3.51571e-06	3.71177e-06	2.86536e-06	2.38809e-06	2.77579e-06	3.37433e-06	3.44157e-06	3.78588e-06	3.16316e-06	3.34671e-06	3.85292e-06	3.83758e-06	3.88089e-06	3.37741e-06	3.56023e-06	4.1873e-06	4.46559e-06
Neuron_42	1.67632e-06	1.49253e-06	1.09336e-06	1.3999e-06	1.14574e-06	1.22115e-06	1.19862e-06	1.56997e-06	1.44435e-06	1.99683e-06	1.60148e-06	1.66072e-06	1.73702e-06	1.29687e-06	1.3163e-06	1.93878e-06	1.49689e-06	1.9146e-06	1.30813e-06	1.72989e-06	1.74682e-06	1.26674e-06	1.23443e-06	1.37885e-06	1.47636e-06	1.29184e-06	1.31654e-06	1.05301e-06	1.49442e-06	1.29347e-06	1.12396e-06	1.30731e-06	1.11581e-06	9.40993e-07	9.58249e-07	1.02927e-06	8.45105e-07	1.05405e-06	1.23009e-06	1.14185e-06	1.32579e-06	1.36352e-06	1.35764e-06	1.38895e-06	1.31753e-06	1.2207e-06	1.4976e-06	1.45635e-06	1.18068e-06
Neuron_43	1.62128e-06	3.67003e-06	3.71005e-06	3.90068e-06	3.30128e-06	1.59115e-06	1.35322e-06	1.95724e-06	1.75391e-06	1.863e-06	1.55861e-06	1.76533e-06	2.12711e-06	2.04792e-06	1.93075e-06	1.58322e-06	1.09519e-06	1.23056e-06	1.28635e-06	1.33671e-06	1.2423e-06	1.85686e-06	1.87927e-06	1.64709e-06	1.79656e-06	1.88683e-06	1.6798e-06	1.1823e-06	1.24274e-06	9.42374e-07	8.90046e-07	1.14565e-06	9.39591e-07	9.2351e-07	8.94515e-07	1.09418e-06	9.53816e-07	1.26734e-06	1.31023e-06	1.08664e-06	1.09925e-06	1.17524e-06	1.1526e-06	8.91697e-07	9.12698e-07	8.39039e-07	7.60599e-07	1.33835e-06	1.3315e-06
Neuron_44	2.60473e-06	1.61194e-06	1.36826e-06	1.34918e-06	1.40771e-06	1.47039e-06	1.97783e-06	1.65897e-06	1.48254e-06	1.6737e-06	1.33777e-06	1.89167e-06	2.18519e-06	2.35873e-06	1.15614e-06	9.28164e-07	1.41577e-06	1.96743e-06	1.12273e-06	1.00303e-06	8.96066e-07	1.99084e-06	1.5441e-06	1.2801e-06	1.75352e-06	2.02519e-06	2.64108e-06	3.08546e-06	2.9302e-06	1.31275e-06	1.20291e-06	1.95207e-06	1.65169e-06	1.32135e-06	1.30199e-06	9.18085e-07	8.64282e-07	1.07338e-06	1.14524e-06	1.03377e-06	1.23398e-06	1.05767e-06	1.05759e-06	1.2815e-06	1.16077e-06	1.00207e-06	1.19147e-06	1.03815e-06	1.28531e-06
Neuron_45	3.59721e-06	3.01391e-06	1.99868e-06	1.26541e-06	1.71119e-06	1.58419e-06	1.8727e-06	2.71976e-06	3.00264e-06	4.09505e-06	3.93122e-06	5.09698e-06	5.44556e-06	4.61916e-06	4.08745e-06	3.15438e-06	2.30163e-06	3.44853e-06	2.26406e-06	2.65045e-06	1.88459e-06	2.00739e-06	2.75495e-06	2.43736e-06	1.87065e-06	2.08322e-06	3.35039e-06	2.79464e-06	2.65435e-06	2.8031e-06	3.27925e-06	3.27054e-06	2.75682e-06	2.86604e-06	2.72263e-06	2.49366e-06	2.94639e-06	3.2851e-06	3.40199e-06	2.38343e-06	2.33416e-06	2.2895e-06	2.54478e-06	1.8659e-06	1.90203e-06	1.8798e-06	1.77071e-06	1.12685e-06	1.19661e-06
Neuron_46	3.29284e-06	2.68064e-06	2.34215e-06	2.54526e-06	2.11377e-06	2.0121e-06	2.31372e-06	2.56792e-06	3.18447e-06	3.152e-06	2.5175e-06	2.47114e-06	2.37096e-06	2.03902e-06	1.66307e-06	2.38978e-06	3.16432e-06	2.66176e-06	2.77839e-06	2.49693e-06	2.56345e-06	2.19148e-06	2.13674e-06	2.73377e-06	2.64323e-06	2.59215e-06	3.43457e-06	3.25198e-06	3.02596e-06	3.23448e-06	2.88829e-06	3.32309e-06	2.52989e-06	2.41719e-06	2.42181e-06	2.7573e-06	2.88028e-06	2.18353e-06	2.49738e-06	2.51961e-06	2.89024e-06	2.4347e-06	2.83304e-06	2.46637e-06	2.26423e-06	2.27882e-06	2.24355e-06	1.75813e-06	1.84828e-06
Neuron_47	3.4317e-06	3.15678e-06	3.4774e-06	2.47985e-06	2.8671e-06	2.7687e-06	2.50907e-06	2.43885e-06	1.68215e-06	1.52696e-06	1.30897e-06	1.40812e-06	1.53737e-06	1.39439e-06	1.24794e-06	1.12981e-06	1.20761e-06	1.57818e-06	1.26442e-06	1.25265e-06	9.14305e-07	1.21056e-06	1.62884e-06	1.49367e-06	1.67279e-06	1.52992e-06	1.80936e-06	1.90847e-06	1.79393e-06	2.66441e-06	2.21238e-06	2.57529e-06	2.10458e-06	1.0941e-06	1.20237e-06	1.2877e-06	1.50119e-06	1.73703e-06	1.71454e-06	1.51889e-06	1.40099e-06	1.3872e-06	1.23303e-06	1.39123e-06	1.5468e-06	1.15366e-06	1.31943e-06	1.45265e-06	1.46079e-06
Neuron_48	1.94088e-06	2.04507e-06	1.50645e-06	2.28769e-06	1.42849e-06	1.59243e-06	1.03456e-06	1.1345e-06	1.15485e-06	2.31309e-06	2.75944e-06	3.50236e-06	2.9671e-06	3.70243e-06	2.23297e-06	2.0408e-06	3.43406e-06	4.27058e-06	3.24143e-06	3.33481e-06	2.7234e-06	3.72705e-06	4.15981e-06	2.83277e-06	2.61959e-06	3.02684e-06	3.91945e-06	3.48477e-06	3.91556e-06	4.19338e-06	3.11227e-06	2.38934e-06	2.54667e-06	1.90322e-06	1.97996e-06	1.72679e-06	1.99401e-06	2.30715e-06	2.41008e-06	1.35165e-06	1.51762e-06	1.46616e-06	1.09449e-06	1.09047e-06	1.24756e-06	9.076e-07	9.12994e-07	1.18724e-06	1.90052e-06
Neuron_49	2.86861e-06	2.5876e-06	2.40791e-06	2.16973e-06	2.07841e-06	2.97424e-06	2.84979e-06	3.25948e-06	2.68599e-06	2.71437e-06	2.48361e-06	3.07098e-06	2.9358e-06	2.94083e-06	3.70228e-06	3.50936e-06	3.15914e-06	3.68834e-06	3.51176e-06	3.24354e-06	2.96566e-06	2.42692e-06	2.30074e-06	1.86929e-06	2.25684e-06	2.00179e-06	1.78236e-06	1.6661e-06	2.19411e-06	1.70466e-06	1.42625e-06	1.63013e-06	1.59878e-06	1.47672e-06	1.5882e-06	1.67024e-06	1.26538e-06	1.86425e-06	1.81314e-06	1.49788e-06	1.71387e-06	1.7086e-06	1.58761e-06	1.52057e-06	1.95205e-06	1.47873e-06	1.41016e-06	1.57589e-06	1.52037e-06
Neuron_50	1.95465e-06	3.78196e-06	2.9157e-06	1.99626e-06	1.95464e-06	1.26896e-06	1.22888e-06	1.08784e-06	9.17912e-07	1.01329e-06	1.10392e-06	1.24207e-06	8.76188e-07	1.3544e-06	1.16149e-06	1.23951e-06	1.50847e-06	2.06724e-06	2.36511e-06	2.55287e-06	3.47768e-06	3.33402e-06	2.89091e-06	2.95703e-06	2.78158e-06	2.97935e-06	1.99366e-06	1.50575e-06	2.112e-06	1.25122e-06	1.17685e-06	1.33909e-06	1.26708e-06	1.8472e-06	1.09263e-06	1.5764e-06	2.59582e-06	2.52807e-06	2.68572e-06	3.16663e-06	3.60224e-06	2.98083e-06	3.35008e-06	3.20624e-06	2.85179e-06	2.47577e-06	2.33417e-06	2.89004e-06	4.21059e-06
Neuron_51	2.634e-06	2.60311e-06	1.65467e-06	1.60292e-06	1.55154e-06	1.527e-06	1.70131e-06	1.75916e-06	1.25149e-06	1.56139e-06	1.34552e-06	1.70848e-06	1.58537e-06	1.55631e-06	2.21095e-06	2.05505e-06	1.97872e-06	2.16276e-06	1.5328e-06	1.89082e-06	1.44024e-06	1.37027e-06	1.44329e-06	1.48107e-06	1.8298e-06	1.46636e-06	2.02743e-06	1.7018e-06	2.17362e-06	2.03309e-06	1.95659e-06	1.89066e-06	1.93324e-06	2.97943e-06	2.72626e-06	2.22544e-06	2.20548e-06	2.92394e-06	2.75654e-06	2.29958e-06	3.16893e-06	2.71941e-06	2.64701e-06	2.72646e-06	3.46205e-06	3.3549e-06	3.02253e-06	2.4883e-06	2.43138e-06
Neuron_52	1.85562e-06	1.64251e-06	1.25678e-06	1.25337e-06	1.28882e-06	1.49596e-06	9.54188e-07	1.13207e-06	1.3178e-06	1.48524e-06	2.06734e-06	1.97613e-06	1.69725e-06	1.83265e-06	3.21779e-06	3.05663e-06	2.44436e-06	2.06205e-06	2.11857e-06	3.01544e-06	2.1854e-06	1.94268e-06	1.72412e-06	1.22349e-06	1.32533e-06	1.06986e-06	1.22849e-06	9.14957e-07	1.16785e-06	1.5192e-06	1.20178e-06	9.99327e-07	1.24749e-06	2.15019e-06	2.28137e-06	2.31684e-06	2.90359e-06	3.5951e-06	3.39735e-06	2.58522e-06	2.16179e-06	2.53986e-06	2.75231e-06	2.55406e-06	2.76801e-06	2.90738e-06	2.96401e-06	3.42254e-06	3.31427e-06
Neuron_53	2.63561e-06	2.64321e-06	1.79329e-06	1.39504e-06	1.32913e-06	1.798e-06	1.54151e-06	3.24624e-06	2.89508e-06	2.34486e-06	1.73583e-06	1.44793e-06	1.16071e-06	1.47177e-06	1.83944e-06	1.989e-06	1.51181e-06	1.63488e-06	1.37106e-06	1.29817e-06	1.25913e-06	1.22277e-06	1.39506e-06	1.65161e-06	1.62152e-06	1.43597e-06	2.14665e-06	1.90245e-06	1.74972e-06	2.26101e-06	2.10048e-06	2.55457e-06	1.93103e-06	2.56723e-06	2.95329e-06	2.38458e-06	2.28929e-06	3.02676e-06	2.81982e-06	3.27003e-06	2.21052e-06	2.16749e-06	2.18538e-06	2.20851e-06	2.04925e-06	1.97751e-06	2.15663e-06	2.25241e-06	2.43472e-06
Neuron_54	2.48169e-06	2.50305e-06	1.76271e-06	1.94801e-06	1.62258e-06	1.95289e-06	1.46025e-06	1.8664e-06	1.37634e-06	1.82255e-06	1.76127e-06	1.3135e-06	1.2317e-06	1.46573e-06	1.39679e-06	1.55848e-06	1.52268e-06	1.74551e-06	1.55133e-06	1.73396e-06	2.15016e-06	2.17928e-06	2.01181e-06	2.06698e-06	2.07263e-06	2.11506e-06	2.59832e-06	2.17555e-06	2.18232e-06	2.23263e-06	1.77438e-06	2.23933e-06	1.85866e-06	1.79805e-06	1.40289e-06	1.55061e-06	1.31781e-06	1.48826e-06	1.47989e-06	1.59914e-06	1.61199e-06	1.68653e-06	1.40991e-06	1.58379e-06	1.68485e-06	1.42674e-06	1.47842e-06	1.65578e-06	1.49612e-06
Neuron_55	2.51403e-06	2.54766e-06	2.27691e-06	1.63503e-06	1.36819e-06	1.79774e-06	1.72661e-06	1.7762e-06	1.74432e-06	2.18716e-06	1.99301e-06	1.80101e-06	1.63839e-06	1.76897e-06	1.911e-06	1.96087e-06	1.72043e-06	2.27316e-06	1.50932e-06	1.4817e-06	1.67139e-06	1.81374e-06	2.04591e-06	1.79277e-06	1.54582e-06	1.20953e-06	1.45946e-06	1.28214e-06	1.71015e-06	1.85959e-06	1.43224e-06	1.85399e-06	1.76707e-06	1.31691e-06	1.39223e-06	1.3509e-06	1.17174e-06	1.86154e-06	1.89038e-06	2.10255e-06	3.28802e-06	2.88868e-06	2.18801e-06	2.21867e-06	2.30118e-06	1.88124e-06	1.86424e-06	2.59845e-06	2.78412e-06
Neuron_56	2.96844e-06	2.67985e-06	2.06353e-06	1.8046e-06	1.87768e-06	1.77914e-06	2.21077e-06	2.23295e-06	2.5853e-06	2.67169e-06	2.37507e-06	1.69511e-06	1.78985e-06	1.75216e-06	1.64744e-06	1.60515e-06	1.86472e-06	2.47013e-06	1.61255e-06	1.75468e-06	1.65537e-06	2.78464e-06	2.50224e-06	2.74779e-06	1.92612e-06	1.733e-06	2.28527e-06	2.23212e-06	2.32217e-06	2.05865e-06	1.91797e-06	1.7517e-06	1.65847e-06	1.89106e-06	1.85208e-06	2.2357e-06	1.91432e-06	1.85213e-06	1.92205e-06	1.64472e-06	1.72382e-06	2.03542e-06	1.9078e-06	2.13117e-06	1.68536e-06	1.58296e-06	1.55308e-06	1.87957e-06	2.1683e-06
Neuron_57	3.39177e-06	1.93311e-06	1.73501e-06	1.51237e-06	1.44742e-06	1.58299e-06	2.20599e-06	1.514e-06	1.43266e-06	1.28604e-06	1.00308e-06	1.37039e-06	1.19063e-06	1.3962e-06	1.4765e-06	1.98996e-06	2.10677e-06	2.31838e-06	2.44679e-06	2.22017e-06	1.28954e-06	1.23142e-06	1.35072e-06	1.81764e-06	2.32094e-06	1.96017e-06	1.74281e-06	2.01495e-06	1.85581e-06	2.26314e-06	1.71306e-06	1.98085e-06	1.52438e-06	1.52696e-06	1.45226e-06	1.01513e-06	1.1312e-06	1.56551e-06	1.72002e-06	1.89502e-06	2.10814e-06	2.61507e-06	2.4434e-06	2.38675e-06	2.54797e-06	1.90942e-06	1.97645e-06	3.13888e-06	3.65097e-06
Neuron_58	6.36004e-06	4.72656e-06	2.96274e-06	2.29805e-06	2.64307e-06	2.12797e-06	2.09762e-06	1.85665e-06	2.84804e-06	2.46866e-06	2.84889e-06	3.51167e-06	3.56095e-06	2.54571e-06	2.47008e-06	2.07261e-06	2.25244e-06	2.11058e-06	1.51722e-06	1.37866e-06	1.95076e-06	3.16156e-06	3.94729e-06	3.55649e-06	4.44027e-06	3.74367e-06	4.8953e-06	3.84396e-06	4.63001e-06	3.63155e-06	3.49509e-06	3.7697e-06	3.45091e-06	2.7097e-06	3.36776e-06	3.17201e-06	3.63256e-06	2.99334e-06	2.55473e-06	3.42007e-06	3.69772e-06	4.07354e-06	3.36793e-06	3.75909e-06	4.03126e-06	3.04502e-06	2.68994e-06	2.67434e-06	3.27547e-06
Neuron_59	2.0553e-06	1.45244e-06	1.34383e-06	8.59839e-07	1.19664e-06	1.29067e-06	1.19505e-06	1.17789e-06	9.81774e-07	1.209e-06	1.17128e-06	1.7436e-06	1.63545e-06	1.74943e-06	1.14201e-06	1.20711e-06	9.06289e-07	1.31971e-06	1.08013e-06	1.03295e-06	1.11946e-06	1.0979e-06	1.58115e-06	1.42878e-06	2.09068e-06	1.70013e-06	1.93098e-06	1.75989e-06	1.7243e-06	1.95298e-06	1.28359e-06	1.2615e-06	1.21462e-06	1.4478e-06	1.18715e-06	1.46553e-06	2.02888e-06	2.18955e-06	2.52736e-06	2.43035e-06	2.84457e-06	2.20811e-06	2.09124e-06	2.46553e-06	1.72845e-06	1.23131e-06	1.13866e-06	1.41868e-06	1.77991e-06
Neuron_60	2.84923e-06	1.99644e-06	2.07762e-06	4.94365e-06	4.65674e-06	3.49779e-06	3.81964e-06	3.43388e-06	2.78315e-06	3.62993e-06	2.8614e-06	2.71127e-06	3.05242e-06	3.83186e-06	3.27104e-06	3.19438e-06	1.92897e-06	2.1934e-06	2.57087e-06	2.12422e-06	2.9619e-06	1.48232e-06	1.42465e-06	1.33646e-06	1.37135e-06	1.57562e-06	1.8286e-06	1.99891e-06	2.81434e-06	1.44259e-06	1.67985e-06	1.45636e-06	1.38475e-06	1.22056e-06	1.31603e-06	1.13449e-06	1.6009e-06	1.40269e-06	1.28368e-06	1.57042e-06	1.55038e-06	2.03694e-06	2.05457e-06	1.65203e-06	1.7293e-06	1.3397e-06	1.24937e-06	1.27023e-06	1.32055e-06
Neuron_61	2.74403e-06	3.1541e-06	2.27871e-06	1.85888e-06	1.91603e-06	2.19471e-06	2.17769e-06	2.18578e-06	2.07889e-06	2.3142e-06	2.03568e-06	2.0308e-06	1.7855e-06	2.17623e-06	2.21834e-06	2.31774e-06	2.47952e-06	3.18658e-06	2.63779e-06	2.42349e-06	2.32385e-06	3.46371e-06	3.30074e-06	3.00553e-06	3.27873e-06	3.28847e-06	4.4729e-06	3.59911e-06	3.97023e-06	4.06133e-06	4.14226e-06	4.58939e-06	4.44303e-06	4.78359e-06	4.0597e-06	3.69376e-06	3.5485e-06	4.30918e-06	4.11681e-06	4.99979e-06	4.82487e-06	5.66873e-06	5.15791e-06	5.2127e-06	5.2029e-06	4.88668e-06	4.90744e-06	5.09404e-06	5.06909e-06
Neuron_62	2.7195e-06	3.56316e-06	3.46106e-06	4.22677e-06	3.73331e-06	2.87163e-06	2.49758e-06	2.27118e-06	2.53758e-06	2.56681e-06	1.99398e-06	1.94716e-06	2.03213e-06	2.00328e-06	1.74017e-06	1.79604e-06	1.73858e-06	2.12735e-06	1.27067e-06	1.29503e-06	1.5524e-06	1.24308e-06	1.38798e-06	2.56252e-06	1.67781e-06	1.60211e-06	1.57517e-06	1.71009e-06	1.95903e-06	1.47711e-06	1.22383e-06	1.36951e-06	1.48809e-06	1.31336e-06	1.47823e-06	1.28701e-06	1.34514e-06	1.61634e-06	1.78143e-06	1.37955e-06	1.80371e-06	1.80363e-06	1.35694e-06	1.44976e-06	2.08402e-06	1.93308e-06	1.92937e-06	1.52663e-06	1.51344e-06
Neuron_63	3.17474e-06	2.22062e-06	2.54049e-06	2.11585e-06	2.33064e-06	2.13485e-06	1.86714e-06	1.76737e-06	1.35619e-06	1.69164e-06	1.78611e-06	1.47095e-06	1.4618e-06	1.7332e-06	1.63984e-06	1.71974e-06	2.03303e-06	1.69981e-06	1.62807e-06	1.63004e-06	1.35793e-06	1.67235e-06	1.68667e-06	1.69022e-06	1.37384e-06	1.53887e-06	1.97027e-06	1.63925e-06	2.44088e-06	1.67641e-06	1.40723e-06	1.45593e-06	1.61441e-06	1.57615e-06	1.70095e-06	1.71391e-06	1.75161e-06	2.12416e-06	2.09871e-06	3.21775e-06	3.23875e-06	3.42417e-06	3.51928e-06	4.03744e-06	3.23468e-06	3.2381e-06	3.0687e-06	2.41357e-06	2.46429e-06
Neuron_64	2.68501e-06	2.13349e-06	2.724e-06	2.58114e-06	2.49712e-06	2.6517e-06	2.56742e-06	2.68009e-06	3.09568e-06	2.30111e-06	1.98508e-06	1.49803e-06	1.65955e-06	1.7862e-06	2.05022e-06	2.38732e-06	2.67343e-06	3.23491e-06	3.13613e-06	2.78518e-06	1.82217e-06	1.94754e-06	1.91703e-06	1.96266e-06	1.51919e-06	1.67038e-06	1.746e-06	1.92368e-06	2.17327e-06	2.38028e-06	1.93648e-06	2.11343e-06	1.83128e-06	2.52438e-06	2.4901e-06	1.80298e-06	2.05319e-06	2.29844e-06	2.355e-06	2.40998e-06	2.48565e-06	2.70654e-06	2.21621e-06	2.29116e-06	1.92705e-06	1.82544e-06	1.80891e-06	1.4324e-06	1.53201e-06
Neuron_65	2.90318e-06	2.23892e-06	1.46891e-06	1.35639e-06	1.50263e-06	1.66363e-06	1.46037e-06	1.58468e-06	1.36942e-06	1.72499e-06	1.72829e-06	1.65264e-06	1.57517e-06	1.72939e-06	1.86689e-06	1.84215e-06	2.23288e-06	2.3082e-06	2.89482e-06	2.89334e-06	4.58345e-06	3.99493e-06	3.91492e-06	3.36979e-06	4.80922e-06	4.61571e-06	4.37773e-06	3.72112e-06	2.63396e-06	2.19665e-06	1.96735e-06	1.98975e-06	1.45975e-06	1.02504e-06	1.1887e-06	1.87777e-06	1.93808e-06	2.74584e-06	2.50433e-06	2.40798e-06	2.0486e-06	2.88196e-06	3.91501e-06	4.23898e-06	4.2754e-06	3.96076e-06	3.3044e-06	3.27734e-06	4.37928e-06
Neuron_66	2.24663e-06	3.182e-06	4.4875e-06	4.34223e-06	5.14693e-06	4.28185e-06	3.42244e-06	2.34565e-06	2.38189e-06	1.84986e-06	1.91548e-06	1.43528e-06	1.342e-06	1.34483e-06	1.22553e-06	1.91861e-06	2.75111e-06	3.69409e-06	2.28029e-06	2.32163e-06	2.14243e-06	1.95128e-06	2.64557e-06	3.27688e-06	3.3568e-06	2.28269e-06	2.99022e-06	2.95325e-06	2.32965e-06	3.51374e-06	2.8367e-06	1.88147e-06	1.5691e-06	1.42621e-06	1.0574e-06	1.1576e-06	1.18355e-06	1.00317e-06	1.02389e-06	1.55941e-06	1.78402e-06	1.93218e-06	2.08616e-06	2.58826e-06	2.14923e-06	2.10744e-06	2.07044e-06	2.84118e-06	2.53553e-06
Neuron_67	3.40659e-06	2.92362e-06	2.04395e-06	1.72347e-06	1.95912e-06	2.0135e-06	1.68611e-06	2.21446e-06	1.581e-06	1.69394e-06	1.50501e-06	1.89869e-06	2.04182e-06	2.55672e-06	1.97926e-06	1.85236e-06	1.85565e-06	2.43893e-06	1.37654e-06	1.45245e-06	1.89057e-06	2.49036e-06	2.12568e-06	1.63925e-06	2.19589e-06	1.87618e-06	1.76179e-06	1.59309e-06	2.24043e-06	2.62672e-06	1.99325e-06	1.95708e-06	1.98431e-06	1.99508e-06	2.25108e-06	1.97003e-06	2.88292e-06	2.61702e-06	2.51433e-06	2.21731e-06	2.09945e-06	2.43274e-06	2.20982e-06	2.79763e-06	2.7481e-06	2.28645e-06	2.00563e-06	2.46661e-06	3.19228e-06
Neuron_68	2.23628e-06	1.99975e-06	1.80202e-06	1.4615e-06	1.53586e-06	1.95109e-06	2.61299e-06	3.57809e-06	4.59754e-06	5.65478e-06	5.22169e-06	5.41967e-06	5.29547e-06	5.43779e-06	4.01855e-06	3.36698e-06	2.54211e-06	1.51172e-06	1.8141e-06	1.68318e-06	1.38083e-06	1.35848e-06	1.44094e-06	1.79935e-06	1.67626e-06	1.46094e-06	1.42121e-06	1.71709e-06	2.01407e-06	1.76302e-06	1.06171e-06	1.11172e-06	1.10039e-06	1.05509e-06	1.08725e-06	1.52677e-06	1.62676e-06	1.07855e-06	1.00723e-06	9.10997e-07	1.12849e-06	1.14185e-06	9.82419e-07	1.05926e-06	1.07267e-06	1.09819e-06	1.10796e-06	1.1213e-06	1.14826e-06
Neuron_69	3.70091e-06	4.42277e-06	4.53231e-06	5.03976e-06	5.01983e-06	4.48638e-06	4.28823e-06	3.85551e-06	3.87599e-06	2.43083e-06	2.37447e-06	2.46528e-06	2.52432e-06	2.45821e-06	1.91602e-06	2.22896e-06	2.65382e-06	3.02698e-06	1.42133e-06	1.68297e-06	1.43398e-06	1.64004e-06	1.631e-06	1.53395e-06	1.43886e-06	1.32266e-06	2.00141e-06	1.81735e-06	2.00157e-06	1.71196e-06	1.48723e-06	1.70822e-06	1.60477e-06	1.78288e-06	1.79558e-06	2.24921e-06	1.54051e-06	2.13104e-06	2.14787e-06	2.18141e-06	2.15005e-06	2.62943e-06	2.43545e-06	2.3215e-06	2.38173e-06	2.03091e-06	1.89443e-06	1.94457e-06	2.51589e-06
Neuron_70	4.35457e-06	3.48361e-06	2.90372e-06	2.7768e-06	2.56238e-06	2.24218e-06	2.38415e-06	3.31783e-06	3.17836e-06	3.22669e-06	2.88763e-06	2.5016e-06	2.9286e-06	2.45836e-06	2.52789e-06	3.01725e-06	2.03789e-06	2.31956e-06	3.01735e-06	2.13917e-06	2.46371e-06	1.65979e-06	1.19874e-06	1.27995e-06	1.05135e-06	9.00753e-07	1.30644e-06	8.17791e-07	1.33602e-06	1.37721e-06	1.26129e-06	1.50733e-06	1.5499e-06	1.85968e-06	1.67393e-06	1.81358e-06	8.14226e-07	1.19862e-06	1.35493e-06	1.68077e-06	1.49745e-06	1.55532e-06	1.13251e-06	2.00385e-06	1.75896e-06	1.81177e-06	1.65049e-06	1.85096e-06	1.57498e-06
Neuron_71	4.17095e-06	3.57469e-06	2.16342e-06	2.26953e-06	2.34908e-06	1.44897e-06	1.38833e-06	1.67569e-06	1.39385e-06	1.7252e-06	1.82251e-06	1.94762e-06	1.68041e-06	2.07228e-06	1.60859e-06	1.66642e-06	2.03289e-06	1.87721e-06	1.63729e-06	1.57122e-06	1.26803e-06	1.64155e-06	1.66434e-06	2.09257e-06	1.45965e-06	1.73874e-06	1.77787e-06	2.85622e-06	2.04843e-06	1.92747e-06	1.63531e-06	1.41886e-06	1.50517e-06	1.10179e-06	1.3603e-06	1.51452e-06	1.43346e-06	1.41376e-06	1.16983e-06	1.31223e-06	1.25092e-06	1.75244e-06	1.42458e-06	1.75044e-06	2.17092e-06	1.90151e-06	2.3163e-06	2.37629e-06	2.22299e-06
Neuron_72	2.2971e-06	2.11458e-06	2.17915e-06	1.55998e-06	1.31657e-06	1.57729e-06	1.70983e-06	1.85704e-06	1.58374e-06	2.15514e-06	2.11404e-06	1.70641e-06	1.78671e-06	3.19389e-06	2.30578e-06	2.08299e-06	2.28475e-06	3.1574e-06	2.81993e-06	2.84385e-06	1.84055e-06	1.64498e-06	1.63318e-06	1.63881e-06	1.68911e-06	1.44989e-06	1.74029e-06	1.26599e-06	1.77605e-06	1.87293e-06	1.37882e-06	1.79076e-06	1.64762e-06	2.27195e-06	3.1483e-06	2.66176e-06	2.9351e-06	3.11176e-06	3.22361e-06	3.74171e-06	3.27888e-06	3.1243e-06	2.43264e-06	2.51971e-06	2.78346e-06	2.28919e-06	2.57057e-06	2.38651e-06	2.4467e-06
Neuron_73	2.81668e-06	3.09653e-06	2.26178e-06	2.41995e-06	1.66319e-06	1.4971e-06	1.59827e-06	1.45992e-06	1.1631e-06	1.50994e-06	1.3275e-06	2.19194e-06	1.9562e-06	2.80368e-06	2.52321e-06	1.59702e-06	2.00036e-06	1.58244e-06	1.80372e-06	1.57597e-06	2.70956e-06	2.90083e-06	2.91163e-06	2.28796e-06	2.6127e-06	2.68505e-06	2.95902e-06	2.86724e-06	3.75673e-06	2.63227e-06	2.00796e-06	2.43023e-06	2.43321e-06	1.58346e-06	1.93524e-06	2.24784e-06	2.56434e-06	2.84311e-06	2.73633e-06	2.72405e-06	2.90474e-06	3.20268e-06	3.04583e-06	2.86883e-06	2.60177e-06	2.23115e-06	2.23801e-06	3.20148e-06	4.57692e-06
Neuron_74	2.04394e-06	1.93214e-06	1.35647e-06	1.30948e-06	1.06894e-06	1.18209e-06	1.25205e-06	1.56353e-06	1.81172e-06	2.37062e-06	2.36958e-06	2.70334e-06	2.60221e-06	2.84059e-06	1.98057e-06	1.454e-06	1.19108e-06	1.49178e-06	1.61932e-06	1.75971e-06	1.37801e-06	1.40439e-06	1.45476e-06	1.56045e-06	1.33394e-06	1.41384e-06	1.31865e-06	1.25296e-06	1.79201e-06	1.3065e-06	1.16182e-06	1.21139e-06	1.13129e-06	1.14515e-06	1.28447e-06	1.486e-06	2.15932e-06	1.75323e-06	1.38732e-06	1.853e-06	1.92621e-06	2.7371e-06	2.49824e-06	2.64403e-06	3.05462e-06	2.72058e-06	2.57392e-06	2.58367e-06	2.2307e-06
Neuron_75	2.69289e-06	3.03219e-06	2.71648e-06	3.89808e-06	4.81162e-06	3.71437e-06	3.81267e-06	2.57169e-06	3.35217e-06	4.10681e-06	3.54605e-06	4.14439e-06	3.95908e-06	2.04453e-06	2.35366e-06	2.35999e-06	1.94184e-06	2.38103e-06	2.06567e-06	1.56463e-06	1.3518e-06	2.18743e-06	1.95767e-06	2.07894e-06	1.2148e-06	1.02708e-06	1.1176e-06	1.11966e-06	2.42825e-06	1.48165e-06	1.2085e-06	1.27302e-06	1.67957e-06	1.50284e-06	1.06777e-06	1.26433e-06	1.13282e-06	1.22449e-06	1.00379e-06	1.27935e-06	1.57e-06	1.54742e-06	1.56616e-06	1.50435e-06	1.23102e-06	1.08143e-06	1.07326e-06	1.57288e-06	1.82596e-06
Neuron_76	3.73649e-06	2.93577e-06	1.48241e-06	1.2796e-06	1.3128e-06	1.35534e-06	1.36496e-06	1.94982e-06	2.36042e-06	1.91663e-06	1.43228e-06	1.44432e-06	1.49736e-06	1.59442e-06	2.23658e-06	2.67748e-06	1.93718e-06	2.2175e-06	2.39805e-06	2.21621e-06	1.75079e-06	1.09494e-06	1.2121e-06	1.54786e-06	1.53723e-06	1.41049e-06	2.11549e-06	1.57001e-06	1.90429e-06	1.77591e-06	1.79194e-06	1.68184e-06	1.28164e-06	1.67891e-06	1.9631e-06	2.57416e-06	2.22855e-06	2.84242e-06	2.80351e-06	2.39231e-06	2.09639e-06	2.09605e-06	1.77822e-06	2.34934e-06	1.56745e-06	1.62666e-06	1.64325e-06	1.37264e-06	1.24394e-06
Neuron_77	4.90052e-06	3.88552e-06	2.9984e-06	3.07766e-06	3.27398e-06	2.76159e-06	2.80133e-06	2.29816e-06	2.16369e-06	2.71143e-06	2.17514e-06	2.15031e-06	2.07992e-06	2.56642e-06	2.22903e-06	2.74468e-06	2.7292e-06	4.88794e-06	2.52194e-06	3.34579e-06	3.88889e-06	4.18228e-06	3.43542e-06	4.34822e-06	3.44877e-06	3.18458e-06	3.53803e-06	3.08176e-06	3.64136e-06	3.64076e-06	3.48601e-06	3.25586e-06	2.99265e-06	2.77931e-06	2.75112e-06	3.0996e-06	1.75007e-06	2.31611e-06	2.35247e-06	2.21194e-06	2.32649e-06	2.45686e-06	2.13073e-06	2.26017e-06	2.52629e-06	1.85226e-06	1.97734e-06	2.19732e-06	2.17604e-06
Neuron_78	3.5171e-06	4.08947e-06	5.37975e-06	4.44554e-06	4.43348e-06	3.8529e-06	4.09186e-06	4.54206e-06	4.20092e-06	3.43582e-06	2.99257e-06	2.16778e-06	2.31862e-06	2.16015e-06	3.3818e-06	3.57781e-06	2.80668e-06	3.47479e-06	3.1842e-06	3.15459e-06	2.7137e-06	3.05034e-06	2.75725e-06	2.63141e-06	2.12737e-06	2.1503e-06	1.73775e-06	1.15534e-06	1.48861e-06	1.23017e-06	1.57428e-06	1.21727e-06	1.15733e-06	9.66925e-07	8.48895e-07	9.4869e-07	9.76805e-07	1.27582e-06	1.29426e-06	1.2385e-06	1.27735e-06	1.73889e-06	2.16166e-06	1.95111e-06	1.40074e-06	1.15333e-06	1.03416e-06	9.76969e-07	1.08437e-06
Neuron_79	2.37193e-06	2.26793e-06	2.12093e-06	1.70405e-06	1.9294e-06	2.34034e-06	2.52182e-06	2.70543e-06	3.28958e-06	2.91055e-06	2.36699e-06	2.24899e-06	1.84731e-06	2.29028e-06	2.25852e-06	2.59906e-06	3.9233e-06	4.62577e-06	3.56841e-06	2.79425e-06	3.47636e-06	2.66575e-06	2.69942e-06	3.48019e-06	3.10129e-06	2.98215e-06	3.55849e-06	2.66838e-06	2.09546e-06	1.81395e-06	1.66152e-06	1.49168e-06	1.41646e-06	1.21822e-06	1.42706e-06	1.72309e-06	2.03618e-06	1.58405e-06	1.76356e-06	1.62857e-06	1.68112e-06	1.68948e-06	1.47887e-06	1.5146e-06	1.59661e-06	1.2929e-06	1.42316e-06	1.48623e-06	1.50167e-06
Neuron_80	5.17318e-06	4.52735e-06	6.27928e-06	5.97514e-06	6.57134e-06	5.99254e-06	5.48794e-06	5.00456e-06	4.91892e-06	4.75958e-06	4.33081e-06	4.07133e-06	4.16145e-06	3.74481e-06	3.01224e-06	3.55482e-06	3.9093e-06	3.17653e-06	3.04414e-06	3.05363e-06	2.95161e-06	2.65892e-06	2.94001e-06	2.628e-06	2.89491e-06	2.89854e-06	2.63455e-06	2.08496e-06	2.88074e-06	2.78348e-06	2.17995e-06	1.87691e-06	1.80282e-06	1.5049e-06	1.87334e-06	2.21512e-06	1.26165e-06	1.29548e-06	1.32942e-06	1.37404e-06	1.30668e-06	1.58912e-06	1.53616e-06	1.6472e-06	1.40393e-06	1.34146e-06	1.19239e-06	1.23906e-06	1.44726e-06
Neuron_81	1.37918e-06	1.69474e-06	9.76595e-07	1.04076e-06	1.31056e-06	1.3268e-06	7.57948e-07	7.61062e-07	7.69556e-07	7.60257e-07	7.73758e-07	8.6537e-07	8.69483e-07	8.85427e-07	1.29184e-06	1.9125e-06	2.01646e-06	3.06496e-06	2.54416e-06	3.32254e-06	1.75172e-06	1.18011e-06	1.59147e-06	1.11838e-06	1.17673e-06	9.13888e-07	1.09035e-06	1.13596e-06	1.19703e-06	1.50949e-06	2.11363e-06	2.35721e-06	2.56942e-06	2.77913e-06	2.81684e-06	2.70936e-06	2.56609e-06	3.35366e-06	3.25692e-06	2.47684e-06	2.1293e-06	1.77618e-06	2.04133e-06	1.60894e-06	2.00259e-06	2.70993e-06	3.06088e-06	1.97542e-06	1.06824e-06
Neuron_82	3.12333e-06	1.74835e-06	1.14304e-06	1.09401e-06	1.22133e-06	1.68541e-06	1.28439e-06	1.30433e-06	1.23526e-06	1.62987e-06	1.33761e-06	1.06932e-06	1.0664e-06	1.19263e-06	1.13013e-06	1.17218e-06	1.40238e-06	1.54107e-06	1.00882e-06	1.19497e-06	1.61488e-06	1.44999e-06	1.52968e-06	1.98471e-06	1.47361e-06	1.65394e-06	1.58983e-06	1.27561e-06	1.72971e-06	1.89456e-06	1.6427e-06	1.6346e-06	1.47554e-06	1.49727e-06	1.29774e-06	1.10877e-06	1.3279e-06	1.03396e-06	1.0449e-06	1.37803e-06	1.62193e-06	1.36065e-06	1.25802e-06	1.19698e-06	1.63192e-06	1.43382e-06	1.40622e-06	1.0601e-06	1.21757e-06
Neuron_83	5.95363e-06	4.69661e-06	3.80161e-06	2.76038e-06	3.07915e-06	2.86479e-06	3.49034e-06	3.0206e-06	2.95394e-06	2.51793e-06	2.40031e-06	2.2127e-06	2.24225e-06	2.1847e-06	2.10218e-06	1.93478e-06	2.13698e-06	2.38785e-06	1.75777e-06	2.09466e-06	1.91149e-06	2.23541e-06	2.04527e-06	2.15873e-06	1.98591e-06	1.79154e-06	2.50205e-06	2.0785e-06	3.0908e-06	2.75582e-06	2.70408e-06	3.28767e-06	3.07515e-06	2.91872e-06	4.00215e-06	4.05678e-06	3.77828e-06	4.78146e-06	4.80714e-06	4.65667e-06	5.02199e-06	5.02881e-06	4.46817e-06	4.80008e-06	5.28076e-06	4.66159e-06	4.47726e-06	3.78191e-06	4.0943e-06
Neuron_84	2.12961e-06	1.85039e-06	2.16327e-06	1.68534e-06	1.69788e-06	1.98412e-06	1.40905e-06	1.44085e-06	1.02166e-06	1.14846e-06	1.40177e-06	1.58972e-06	1.47596e-06	1.49047e-06	1.76385e-06	1.20806e-06	1.05328e-06	1.2188e-06	1.40528e-06	1.45166e-06	1.59461e-06	1.26794e-06	1.56291e-06	1.28491e-06	1.05511e-06	1.33925e-06	1.18087e-06	9.84609e-07	1.78954e-06	1.39104e-06	1.15089e-06	1.45842e-06	1.92612e-06	2.15884e-06	1.53494e-06	1.10669e-06	1.28554e-06	1.7989e-06	1.9816e-06	2.32209e-06	3.09905e-06	3.18398e-06	3.08365e-06	2.43455e-06	2.26018e-06	1.69192e-06	1.55112e-06	2.6494e-06	3.30581e-06
Neuron_85	1.85256e-06	2.12466e-06	1.8473e-06	1.42819e-06	1.66727e-06	1.54849e-06	1.27031e-06	2.1179e-06	1.75057e-06	2.39829e-06	1.89309e-06	2.2478e-06	2.32428e-06	2.73345e-06	2.44167e-06	2.5114e-06	8.65318e-07	1.44956e-06	1.14051e-06	9.55015e-07	7.77125e-07	1.03419e-06	8.41867e-07	9.78984e-07	8.7945e-07	8.82242e-07	8.33367e-07	1.01322e-06	1.47481e-06	1.92147e-06	2.83296e-06	2.48379e-06	2.43983e-06	3.02684e-06	2.97928e-06	2.81516e-06	2.73116e-06	2.64052e-06	2.747e-06	2.97174e-06	2.23295e-06	1.99866e-06	2.2381e-06	1.7597e-06	1.68972e-06	1.555e-06	1.61792e-06	1.86543e-06	1.73914e-06
Neuron_86	3.04513e-06	2.59134e-06	2.07594e-06	1.73028e-06	1.97685e-06	1.70277e-06	1.63488e-06	1.77233e-06	1.6578e-06	1.65321e-06	1.58578e-06	1.43996e-06	1.84873e-06	1.65685e-06	1.87488e-06	2.3197e-06	2.3098e-06	2.87223e-06	1.58419e-06	1.42923e-06	1.4271e-06	1.74644e-06	1.72918e-06	2.0579e-06	1.53653e-06	1.52836e-06	1.69988e-06	1.71175e-06	2.79806e-06	2.23812e-06	1.76334e-06	2.12805e-06	1.79753e-06	1.61256e-06	1.91522e-06	1.74784e-06	1.44488e-06	1.79592e-06	1.81357e-06	1.63271e-06	2.01551e-06	1.71517e-06	2.00784e-06	1.67008e-06	1.67756e-06	1.57182e-06	1.61388e-06	2.06818e-06	2.27453e-06
Neuron_87	5.62873e-06	1.43623e-06	2.08512e-06	1.06009e-06	1.2369e-06	1.3799e-06	1.05992e-06	1.9784e-06	2.67358e-06	1.86195e-06	1.76043e-06	1.96496e-06	1.86483e-06	1.64199e-06	2.19529e-06	2.76113e-06	2.11757e-06	2.15814e-06	1.24688e-06	1.25159e-06	9.91702e-07	1.43353e-06	1.49024e-06	1.79763e-06	1.42577e-06	1.30439e-06	1.10382e-06	1.06203e-06	1.7087e-06	1.526e-06	2.31673e-06	2.32333e-06	2.6665e-06	2.67929e-06	2.33728e-06	1.99354e-06	1.86443e-06	2.02703e-06	2.07949e-06	2.60067e-06	3.37705e-06	2.81221e-06	3.19791e-06	2.44057e-06	3.25298e-06	3.36093e-06	3.38186e-06	3.41749e-06	3.28563e-06
Neuron_88	1.70027e-06	1.2044e-06	1.34197e-06	1.44197e-06	1.8997e-06	1.72615e-06	1.12908e-06	9.98944e-07	9.709e-07	1.23441e-06	1.127e-06	1.30463e-06	1.21897e-06	8.83371e-07	9.76563e-07	8.12188e-07	1.00625e-06	1.47113e-06	9.42171e-07	1.04031e-06	1.09522e-06	8.26821e-07	9.93073e-07	1.07968e-06	1.16459e-06	1.45608e-06	1.94287e-06	2.30336e-06	1.31543e-06	1.02299e-06	8.64297e-07	6.91384e-07	8.71509e-07	9.70535e-07	7.44209e-07	8.4159e-07	1.84241e-06	2.31022e-06	2.32065e-06	3.00264e-06	3.34334e-06	3.33628e-06	3.48514e-06	3.70571e-06	3.67385e-06	3.22464e-06	3.20041e-06	2.49943e-06	1.90499e-06
Neuron_89	4.4674e-06	3.30965e-06	2.83831e-06	2.20335e-06	2.34999e-06	2.63882e-06	2.70573e-06	2.5015e-06	2.40807e-06	2.82123e-06	2.58343e-06	2.21107e-06	2.34018e-06	2.8482e-06	3.09825e-06	2.79617e-06	3.60052e-06	3.40807e-06	3.40179e-06	2.96792e-06	3.37261e-06	4.05121e-06	3.217e-06	4.01495e-06	2.91929e-06	3.33043e-06	2.98922e-06	2.5522e-06	3.57071e-06	3.09864e-06	2.33068e-06	2.95022e-06	3.18183e-06	3.56151e-06	3.30381e-06	2.80398e-06	3.49921e-06	3.51012e-06	3.83899e-06	3.3069e-06	3.86244e-06	3.1167e-06	2.86126e-06	2.57483e-06	2.71747e-06	2.4333e-06	2.5425e-06	2.4288e-06	2.42195e-06
Neuron_90	3.76015e-06	3.34313e-06	3.36097e-06	3.09204e-06	3.06964e-06	1.95348e-06	1.86237e-06	1.93256e-06	1.85655e-06	2.28182e-06	2.05321e-06	1.92711e-06	2.0887e-06	2.42528e-06	2.09594e-06	2.28048e-06	1.99916e-06	3.14478e-06	2.32326e-06	2.25812e-06	1.96602e-06	1.93592e-06	1.97399e-06	1.92115e-06	1.84292e-06	1.78396e-06	1.84398e-06	1.70161e-06	2.78103e-06	2.9421e-06	2.37295e-06	2.46085e-06	2.23365e-06	1.8071e-06	1.64746e-06	1.65808e-06	1.46257e-06	2.10936e-06	1.83289e-06	1.9035e-06	2.07181e-06	2.36734e-06	1.89708e-06	1.68703e-06	1.81861e-06	1.48908e-06	1.4869e-06	1.97802e-06	1.77913e-06
Neuron_91	3.25925e-06	3.91466e-06	4.41535e-06	3.33609e-06	3.37248e-06	2.27888e-06	2.86704e-06	2.22703e-06	1.81058e-06	2.21872e-06	1.79996e-06	1.69605e-06	1.47834e-06	1.74475e-06	1.58009e-06	1.83642e-06	1.7411e-06	1.91879e-06	1.81521e-06	1.74837e-06	1.56606e-06	1.96446e-06	1.89946e-06	1.93921e-06	1.89307e-06	1.63792e-06	1.84923e-06	1.95741e-06	2.545e-06	2.14645e-06	1.72311e-06	2.08149e-06	2.06928e-06	1.51758e-06	1.58304e-06	1.70572e-06	1.60523e-06	1.6757e-06	1.43626e-06	1.69307e-06	1.70338e-06	2.04529e-06	2.29697e-06	1.91023e-06	1.88956e-06	1.83374e-06	1.65528e-06	1.6999e-06	1.64847e-06
Neuron_92	2.37647e-06	2.08483e-06	2.43844e-06	1.86066e-06	1.69784e-06	2.32964e-06	2.22912e-06	2.05619e-06	1.82306e-06	1.5046e-06	1.34471e-06	1.21169e-06	1.09219e-06	1.16539e-06	1.35797e-06	1.30555e-06	1.64585e-06	2.62042e-06	2.05228e-06	1.80552e-06	1.22814e-06	1.214e-06	1.09883e-06	1.16154e-06	1.11514e-06	1.28651e-06	1.43462e-06	1.20854e-06	1.36707e-06	1.43062e-06	1.128e-06	1.10929e-06	1.35072e-06	1.54927e-06	1.86674e-06	2.26233e-06	2.23401e-06	2.72846e-06	3.02678e-06	2.66523e-06	2.78479e-06	2.70584e-06	2.49732e-06	2.96119e-06	2.20825e-06	2.34981e-06	2.42688e-06	2.48059e-06	2.22126e-06
Neuron_93	2.4618e-06	1.66581e-06	1.23733e-06	1.35936e-06	1.54067e-06	9.7042e-07	1.13696e-06	1.02021e-06	1.01167e-06	1.04867e-06	1.26103e-06	1.70276e-06	1.74899e-06	2.06482e-06	2.09343e-06	1.68037e-06	2.24113e-06	2.08499e-06	2.33237e-06	1.86694e-06	1.51539e-06	2.58246e-06	1.74493e-06	1.43495e-06	1.51888e-06	1.55638e-06	2.03204e-06	1.55958e-06	2.96123e-06	1.55413e-06	1.33046e-06	1.46046e-06	1.71928e-06	1.90532e-06	1.86253e-06	1.50909e-06	1.49229e-06	9.55276e-07	8.76494e-07	9.58294e-07	9.06058e-07	9.67182e-07	9.71045e-07	9.58275e-07	1.00724e-06	7.81409e-07	8.70906e-07	9.82121e-07	8.22395e-07
Neuron_94	3.58742e-06	3.10782e-06	2.53122e-06	2.39137e-06	2.28408e-06	2.17145e-06	2.02895e-06	1.96806e-06	1.82596e-06	1.90498e-06	1.81432e-06	1.85104e-06	2.15253e-06	1.84985e-06	2.2908e-06	3.38654e-06	2.33106e-06	2.70671e-06	2.15869e-06	2.6263e-06	2.28193e-06	2.07795e-06	2.35337e-06	2.35458e-06	2.58262e-06	2.07347e-06	1.87553e-06	2.27125e-06	2.52235e-06	3.10309e-06	3.01844e-06	2.63458e-06	2.3896e-06	1.91174e-06	2.05007e-06	2.187e-06	1.5123e-06	1.98895e-06	1.93539e-06	1.96141e-06	2.29372e-06	2.48279e-06	2.04332e-06	1.87103e-06	2.11808e-06	2.36069e-06	2.08119e-06	2.02334e-06	2.17307e-06
Neuron_95	2.11218e-06	1.43496e-06	1.39476e-06	1.16367e-06	1.20681e-06	1.27249e-06	1.28897e-06	1.28631e-06	1.10637e-06	1.59035e-06	1.599e-06	1.69042e-06	2.47587e-06	2.64652e-06	2.32206e-06	2.7401e-06	1.71619e-06	1.75183e-06	1.1064e-06	1.30905e-06	1.10599e-06	1.40765e-06	1.46662e-06	1.39751e-06	1.13339e-06	1.05329e-06	1.47859e-06	1.16928e-06	2.69372e-06	2.27705e-06	2.46451e-06	2.76934e-06	2.49948e-06	3.32137e-06	3.474e-06	2.4742e-06	3.56659e-06	3.79954e-06	4.08684e-06	4.3949e-06	3.6389e-06	3.7012e-06	4.1268e-06	3.56684e-06	3.50376e-06	3.9165e-06	3.5528e-06	3.27243e-06	3.08097e-06
Neuron_96	5.54112e-06	3.17746e-06	1.56078e-06	1.4084e-06	1.50035e-06	1.44664e-06	1.31907e-06	1.55672e-06	1.61648e-06	1.47268e-06	1.44568e-06	1.78276e-06	1.80596e-06	1.66644e-06	2.49562e-06	2.38353e-06	2.39873e-06	2.96563e-06	2.31469e-06	3.28067e-06	2.32722e-06	2.69854e-06	1.99661e-06	2.68777e-06	2.29895e-06	2.30628e-06	2.49492e-06	3.25078e-06	4.8272e-06	4.18966e-06	3.96711e-06	4.42649e-06	4.5255e-06	4.09028e-06	3.00868e-06	3.59723e-06	3.47833e-06	4.06261e-06	4.03935e-06	4.25068e-06	3.4913e-06	3.14718e-06	2.47613e-06	2.23593e-06	2.12444e-06	2.36563e-06	2.10796e-06	1.85876e-06	2.17086e-06
Neuron_97	2.00519e-06	2.66832e-06	1.95406e-06	1.75795e-06	1.50486e-06	1.37448e-06	1.426e-06	1.27656e-06	1.43825e-06	1.62746e-06	1.43395e-06	1.33308e-06	1.12078e-06	1.27108e-06	1.2577e-06	1.25684e-06	1.35797e-06	1.64157e-06	1.09024e-06	1.06785e-06	1.55194e-06	2.29712e-06	3.19217e-06	3.05761e-06	2.92854e-06	2.65178e-06	3.37777e-06	3.13544e-06	2.12847e-06	1.55841e-06	1.48964e-06	1.42142e-06	1.17409e-06	1.13627e-06	1.05397e-06	1.14992e-06	1.19217e-06	1.31543e-06	1.61417e-06	1.79766e-06	1.23961e-06	1.49068e-06	1.26721e-06	1.42138e-06	1.8623e-06	1.32673e-06	1.34712e-06	1.05728e-06	1.70271e-06
Neuron_98	2.09163e-06	2.30589e-06	4.24315e-06	3.74471e-06	3.33828e-06	2.33608e-06	1.26243e-06	1.32641e-06	1.15369e-06	1.08823e-06	1.30853e-06	1.06031e-06	1.15052e-06	1.30805e-06	1.46286e-06	1.41462e-06	1.39441e-06	1.77976e-06	1.90225e-06	2.46578e-06	2.02647e-06	1.83296e-06	2.03198e-06	1.96397e-06	1.67662e-06	1.37004e-06	1.99419e-06	1.38533e-06	2.28959e-06	2.48888e-06	3.33995e-06	3.15923e-06	3.28505e-06	2.68671e-06	2.49673e-06	1.8314e-06	2.03131e-06	1.45993e-06	1.37773e-06	1.174e-06	1.29767e-06	1.53192e-06	1.10614e-06	1.13463e-06	1.68398e-06	1.15704e-06	1.10972e-06	1.23178e-06	1.39787e-06
Neuron_99	3.01614e-06	2.47252e-06	1.8367e-06	1.90307e-06	1.93964e-06	2.12581e-06	1.40938e-06	1.57973e-06	1.76278e-06	1.72945e-06	1.41625e-06	1.43988e-06	1.36534e-06	1.43723e-06	1.60306e-06	1.52792e-06	1.7105e-06	1.78945e-06	1.3236e-06	1.34367e-06	2.13555e-06	2.42452e-06	1.68446e-06	3.22542e-06	2.26225e-06	2.97089e-06	2.94335e-06	2.96727e-06	5.17553e-06	3.67893e-06	4.06498e-06	3.82595e-06	4.25973e-06	4.30919e-06	3.91406e-06	4.47334e-06	3.46135e-06	4.02738e-06	4.08281e-06	4.53206e-06	3.73643e-06	3.90742e-06	3.67344e-06	4.56984e-06	3.28915e-06	3.09604e-06	3.12046e-06	2.35816e-06	2.85917e-06
Neuron_100	6.48802e-06	3.96429e-06	1.92133e-06	1.7184e-06	1.51367e-06	2.0317e-06	2.85015e-06	3.27813e-06	4.33769e-06	3.83205e-06	3.39472e-06	3.25046e-06	3.73615e-06	3.90558e-06	3.80787e-06	3.65113e-06	3.77032e-06	4.02057e-06	3.3854e-06	3.84639e-06	3.22477e-06	2.69419e-06	2.04888e-06	1.78994e-06	1.92577e-06	2.00783e-06	2.15542e-06	1.44382e-06	2.0106e-06	1.26912e-06	1.29497e-06	1.49028e-06	1.29592e-06	1.40118e-06	1.54047e-06	1.52986e-06	1.40196e-06	1.31033e-06	1.47083e-06	1.23283e-06	1.45666e-06	1.18468e-06	1.49347e-06	1.71122e-06	1.32583e-06	1.13451e-06	1.19902e-06	1.36704e-06	2.10175e-06
Neuron_101	2.37304e-06	1.95163e-06	2.07295e-06	1.17352e-06	1.3927e-06	1.2442e-06	1.211e-06	1.08325e-06	1.3536e-06	1.25152e-06	1.26366e-06	1.18253e-06	1.08889e-06	1.03782e-06	1.12548e-06	1.25696e-06	1.49594e-06	2.04012e-06	1.32839e-06	1.03009e-06	1.28597e-06	1.26262e-06	1.23745e-06	1.16524e-06	1.28387e-06	1.13874e-06	1.26244e-06	9.89612e-07	2.26362e-06	1.31731e-06	1.58866e-06	1.77805e-06	1.35506e-06	9.8699e-07	1.08384e-06	1.15665e-06	1.00658e-06	9.74268e-07	1.00923e-06	1.04014e-06	1.19355e-06	1.50335e-06	1.09156e-06	1.13168e-06	1.25867e-06	9.00374e-07	1.03444e-06	1.17127e-06	1.16894e-06
Neuron_102	3.52746e-06	2.45778e-06	2.02326e-06	2.03069e-06	1.69929e-06	1.63688e-06	1.78905e-06	1.95845e-06	1.71987e-06	1.65538e-06	1.61511e-06	2.35813e-06	2.91659e-06	3.19156e-06	3.13735e-06	3.27432e-06	2.08457e-06	2.89623e-06	1.82291e-06	2.41113e-06	1.9706e-06	1.72395e-06	1.70569e-06	1.81769e-06	1.9374e-06	1.88436e-06	2.13563e-06	2.15954e-06	2.22826e-06	2.36581e-06	2.16457e-06	2.07531e-06	1.90001e-06	1.64639e-06	1.80624e-06	1.60179e-06	1.39451e-06	2.00728e-06	1.81839e-06	1.83409e-06	2.17685e-06	1.90875e-06	2.46352e-06	2.12556e-06	2.22063e-06	2.08789e-06	2.15286e-06	2.12133e-06	1.9905e-06
Neuron_103	1.73611e-06	1.86462e-06	2.33833e-06	3.14952e-06	2.21137e-06	2.70547e-06	2.27016e-06	1.86616e-06	1.70629e-06	1.15386e-06	1.58399e-06	1.07269e-06	1.09495e-06	9.91203e-07	1.5706e-06	1.13151e-06	1.13091e-06	1.66525e-06	1.25311e-06	1.31674e-06	1.78142e-06	2.2921e-06	2.80634e-06	2.78299e-06	2.13811e-06	1.87585e-06	1.48854e-06	1.19665e-06	1.70615e-06	1.88743e-06	2.25949e-06	2.49692e-06	2.84977e-06	1.73842e-06	1.4273e-06	1.07897e-06	1.50391e-06	1.3056e-06	9.91075e-07	1.50088e-06	1.84495e-06	1.80995e-06	1.60882e-06	1.9988e-06	1.76087e-06	1.6812e-06	1.64583e-06	1.95424e-06	2.21711e-06
Neuron_104	1.99611e-06	1.77698e-06	1.3534e-06	1.44479e-06	1.22067e-06	1.02897e-06	1.09613e-06	1.13603e-06	1.07887e-06	1.6132e-06	1.05713e-06	9.80347e-07	9.90212e-07	1.00356e-06	1.36614e-06	1.42764e-06	2.86169e-06	3.63624e-06	2.36148e-06	2.85193e-06	1.09363e-06	1.46067e-06	1.65224e-06	1.21707e-06	1.11973e-06	1.30293e-06	1.21629e-06	1.24466e-06	2.33105e-06	1.2829e-06	1.51396e-06	1.43293e-06	1.44041e-06	9.17554e-07	1.31245e-06	1.04187e-06	9.61267e-07	1.0202e-06	1.23986e-06	1.6974e-06	2.20369e-06	1.71745e-06	1.36228e-06	1.91731e-06	1.78107e-06	1.13503e-06	1.34539e-06	2.00404e-06	2.42331e-06
Neuron_105	3.33486e-06	2.50823e-06	2.37705e-06	1.926e-06	2.34886e-06	2.57123e-06	2.54567e-06	3.47021e-06	2.98185e-06	2.30152e-06	1.98874e-06	1.96758e-06	1.74479e-06	2.07232e-06	1.9213e-06	2.38597e-06	2.60893e-06	2.26e-06	2.23765e-06	2.05418e-06	1.65075e-06	2.25669e-06	1.88473e-06	2.35319e-06	1.74743e-06	1.48389e-06	1.98168e-06	1.63293e-06	2.3497e-06	1.84003e-06	1.40825e-06	1.76048e-06	1.92207e-06	1.51268e-06	1.79872e-06	1.78105e-06	1.69976e-06	1.69827e-06	1.67128e-06	1.66662e-06	2.12009e-06	2.42974e-06	2.07709e-06	2.12676e-06	2.24408e-06	1.76283e-06	1.82198e-06	1.88264e-06	2.02212e-06
Neuron_106	3.40261e-06	2.7146e-06	2.49498e-06	2.5413e-06	1.82685e-06	1.55434e-06	2.07496e-06	1.5249e-06	1.48091e-06	1.75586e-06	1.64047e-06	1.71942e-06	1.56862e-06	1.91864e-06	2.39301e-06	2.02462e-06	2.00287e-06	2.2195e-06	1.55857e-06	1.74201e-06	1.38232e-06	1.4025e-06	1.44374e-06	2.02513e-06	1.60825e-06	1.28394e-06	1.6287e-06	1.42646e-06	2.93681e-06	2.36487e-06	3.54001e-06	3.10081e-06	3.33101e-06	4.66678e-06	2.9507e-06	2.8497e-06	3.53374e-06	3.30569e-06	3.46349e-06	2.51001e-06	3.27279e-06	2.31795e-06	1.50827e-06	1.72794e-06	1.76537e-06	1.61496e-06	1.73977e-06	1.5699e-06	1.65537e-06
Neuron_107	2.40342e-06	1.93296e-06	1.94053e-06	1.3376e-06	1.41593e-06	1.43817e-06	1.49646e-06	1.42281e-06	1.36629e-06	1.32272e-06	1.39016e-06	1.24055e-06	1.43306e-06	2.25428e-06	1.37714e-06	1.29744e-06	1.39502e-06	1.97196e-06	1.1701e-06	1.37329e-06	1.31778e-06	1.37958e-06	1.42723e-06	1.88376e-06	1.4886e-06	1.65208e-06	1.44166e-06	1.43767e-06	1.3804e-06	1.6435e-06	1.54009e-06	1.64808e-06	1.81435e-06	1.24574e-06	1.28169e-06	1.12117e-06	1.22806e-06	1.78776e-06	1.46509e-06	2.17252e-06	2.91678e-06	3.08665e-06	2.10231e-06	2.65044e-06	1.74466e-06	1.84024e-06	1.91122e-06	1.80351e-06	1.7301e-06
Neuron_108	2.79905e-06	4.01182e-06	3.52358e-06	3.27766e-06	3.56435e-06	3.14231e-06	2.91414e-06	2.25684e-06	2.07328e-06	1.75827e-06	1.49931e-06	1.61168e-06	1.46528e-06	1.99538e-06	1.65094e-06	2.00851e-06	1.86096e-06	2.12641e-06	1.52497e-06	1.48012e-06	1.63615e-06	1.70524e-06	1.9729e-06	1.78699e-06	1.50366e-06	1.40708e-06	1.60807e-06	1.35353e-06	1.86579e-06	1.81467e-06	1.48221e-06	1.57584e-06	1.47881e-06	1.61562e-06	1.72631e-06	1.93397e-06	1.53103e-06	1.75809e-06	1.69973e-06	1.66878e-06	1.77054e-06	2.21201e-06	1.8127e-06	1.68303e-06	1.5048e-06	1.91439e-06	1.75173e-06	1.47114e-06	1.46991e-06
Neuron_109	2.58115e-06	4.83613e-06	4.95911e-06	4.92825e-06	3.75784e-06	4.22767e-06	4.37391e-06	4.26111e-06	3.92723e-06	3.40142e-06	2.78192e-06	2.06532e-06	1.95352e-06	1.54276e-06	1.74904e-06	1.7486e-06	1.85805e-06	2.47284e-06	1.34407e-06	1.64994e-06	1.47471e-06	1.32046e-06	1.79228e-06	1.44501e-06	1.13668e-06	1.15134e-06	9.78049e-07	1.49113e-06	1.7338e-06	1.73994e-06	1.61539e-06	2.43449e-06	1.90167e-06	1.9051e-06	1.4635e-06	1.09242e-06	1.04415e-06	8.58605e-07	9.51111e-07	8.48264e-07	8.62822e-07	1.06856e-06	1.43906e-06	1.701e-06	1.09714e-06	8.42989e-07	7.68632e-07	1.19188e-06	1.20705e-06
Neuron_110	2.27666e-06	2.45178e-06	1.72027e-06	1.71478e-06	1.3238e-06	1.08803e-06	1.14763e-06	1.36735e-06	1.46765e-06	1.47713e-06	1.10169e-06	1.32962e-06	1.27618e-06	1.2947e-06	1.66556e-06	2.00255e-06	1.61177e-06	1.81293e-06	1.79484e-06	1.71671e-06	1.26078e-06	1.15527e-06	1.06981e-06	1.43507e-06	1.10283e-06	9.856e-07	1.27613e-06	1.14001e-06	1.34912e-06	1.17812e-06	1.24707e-06	1.37196e-06	1.29397e-06	1.12498e-06	9.94928e-07	1.0671e-06	1.74218e-06	1.37718e-06	1.43854e-06	1.29159e-06	1.04801e-06	1.26278e-06	1.56868e-06	1.38955e-06	1.59636e-06	1.64653e-06	1.45641e-06	1.33808e-06	1.38283e-06
Neuron_111	3.95454e-06	3.05541e-06	3.29481e-06	2.67632e-06	2.20306e-06	2.2852e-06	2.32545e-06	2.45899e-06	2.32753e-06	2.81492e-06	2.57036e-06	2.80941e-06	2.47177e-06	2.42925e-06	2.36237e-06	2.19509e-06	2.6913e-06	2.65792e-06	2.00889e-06	2.2648e-06	1.80979e-06	2.45726e-06	2.4848e-06	2.675e-06	2.43075e-06	2.03131e-06	2.40094e-06	2.10278e-06	2.94826e-06	2.49396e-06	2.11996e-06	2.59316e-06	2.26327e-06	2.33405e-06	3.27477e-06	2.75976e-06	2.68482e-06	4.27908e-06	4.42171e-06	5.26586e-06	4.92332e-06	5.08949e-06	5.27298e-06	4.90919e-06	4.73522e-06	4.16879e-06	4.64386e-06	4.34467e-06	4.13713e-06
Neuron_112	2.41853e-06	2.16614e-06	1.60666e-06	2.33039e-06	2.16e-06	1.75077e-06	1.81755e-06	1.85813e-06	1.54839e-06	2.0525e-06	1.6774e-06	1.83892e-06	1.71007e-06	1.93922e-06	1.98002e-06	1.26283e-06	1.49703e-06	3.00396e-06	1.83254e-06	1.6329e-06	1.16672e-06	1.2514e-06	1.24651e-06	1.39487e-06	1.29282e-06	1.24756e-06	2.11895e-06	2.67413e-06	2.01643e-06	1.86625e-06	1.91531e-06	1.91459e-06	1.76656e-06	1.57681e-06	1.28026e-06	1.23052e-06	2.08966e-06	2.18539e-06	2.2637e-06	2.04083e-06	2.63732e-06	1.85722e-06	2.30123e-06	2.27684e-06	1.74989e-06	1.33494e-06	1.19178e-06	1.45026e-06	1.68366e-06
Neuron_113	2.36954e-06	2.19359e-06	1.86447e-06	1.51194e-06	1.31254e-06	1.74622e-06	1.58632e-06	1.63326e-06	1.32316e-06	1.66276e-06	1.35171e-06	1.22231e-06	1.22049e-06	1.63594e-06	1.5339e-06	1.48225e-06	1.82042e-06	2.13915e-06	1.78793e-06	1.31625e-06	1.27894e-06	1.57651e-06	1.52215e-06	1.3693e-06	1.44541e-06	1.24273e-06	1.53404e-06	1.22458e-06	1.63624e-06	1.39096e-06	1.29837e-06	1.52141e-06	1.42777e-06	1.27265e-06	1.29855e-06	1.32355e-06	1.52156e-06	2.45267e-06	2.37983e-06	2.25431e-06	3.09406e-06	2.65306e-06	1.96137e-06	2.93648e-06	2.58155e-06	2.1649e-06	2.39384e-06	1.77404e-06	1.02496e-06
Neuron_114	2.34844e-06	1.7892e-06	1.82657e-06	1.45676e-06	1.7148e-06	1.30257e-06	1.23782e-06	1.3713e-06	1.26678e-06	1.00147e-06	9.89493e-07	1.23884e-06	1.11262e-06	1.37045e-06	1.2045e-06	9.97955e-07	1.05738e-06	2.46179e-06	1.23753e-06	9.19976e-07	9.52203e-07	9.92477e-07	1.2879e-06	1.32345e-06	9.26942e-07	9.92566e-07	9.6374e-07	8.70585e-07	1.22552e-06	1.34066e-06	1.53616e-06	1.70012e-06	1.57708e-06	1.36868e-06	8.51832e-07	1.10175e-06	7.47342e-07	1.04295e-06	9.89921e-07	7.70629e-07	1.23052e-06	9.32142e-07	1.02914e-06	9.1996e-07	1.26387e-06	7.85187e-07	7.50095e-07	9.14574e-07	1.19261e-06
Neuron_115	2.7922e-06	2.45999e-06	1.94442e-06	1.45934e-06	1.74422e-06	1.80193e-06	2.26898e-06	2.07457e-06	2.30658e-06	2.1421e-06	2.64071e-06	2.38992e-06	2.43582e-06	2.4425e-06	2.78324e-06	3.09054e-06	3.7226e-06	3.02502e-06	3.27881e-06	2.92089e-06	3.02324e-06	4.534e-06	3.47036e-06	4.10809e-06	2.32881e-06	3.06618e-06	2.47871e-06	2.05543e-06	3.22922e-06	2.0263e-06	2.63819e-06	3.29447e-06	3.14536e-06	1.66926e-06	1.69441e-06	1.56552e-06	1.60364e-06	1.30175e-06	1.34523e-06	1.23881e-06	1.3345e-06	1.68846e-06	1.54824e-06	1.73317e-06	1.48664e-06	1.34086e-06	1.22225e-06	1.2362e-06	1.29491e-06
Neuron_116	2.87239e-06	1.47472e-06	1.6501e-06	1.0493e-06	1.12895e-06	1.76792e-06	1.68942e-06	2.18037e-06	1.55606e-06	1.43126e-06	1.48454e-06	1.10728e-06	1.31121e-06	1.24938e-06	1.46177e-06	1.26269e-06	1.81762e-06	1.7125e-06	1.8577e-06	1.73752e-06	1.22662e-06	1.52516e-06	1.55301e-06	2.03633e-06	1.72116e-06	1.46812e-06	1.96497e-06	1.45292e-06	1.56562e-06	1.53556e-06	2.35932e-06	3.05167e-06	2.37716e-06	2.42367e-06	2.4825e-06	2.24692e-06	1.90002e-06	2.59119e-06	2.62257e-06	2.39009e-06	2.2141e-06	2.4063e-06	2.71872e-06	2.41913e-06	2.41676e-06	1.9981e-06	1.78808e-06	1.05907e-06	1.23672e-06
Neuron_117	3.51311e-06	3.64736e-06	3.05193e-06	2.75055e-06	3.05238e-06	3.38355e-06	3.63867e-06	3.85875e-06	2.73975e-06	3.16133e-06	3.06298e-06	2.93136e-06	2.92799e-06	3.64941e-06	4.0831e-06	4.24668e-06	3.56226e-06	3.22795e-06	3.89396e-06	4.27996e-06	4.58567e-06	5.01084e-06	5.00555e-06	4.60231e-06	4.81823e-06	4.71924e-06	4.51971e-06	2.85238e-06	3.547e-06	3.09308e-06	2.20042e-06	2.55415e-06	2.30083e-06	2.02338e-06	1.99628e-06	2.46819e-06	2.69093e-06	3.47865e-06	3.45671e-06	3.77809e-06	4.04766e-06	4.65602e-06	3.46239e-06	3.92455e-06	3.53292e-06	4.1129e-06	4.02647e-06	3.6359e-06	3.63359e-06
Neuron_118	4.09058e-06	3.24292e-06	2.5084e-06	2.77162e-06	2.5326e-06	2.62675e-06	2.36395e-06	2.89305e-06	2.60003e-06	2.61322e-06	2.44808e-06	2.25171e-06	2.45026e-06	3.21478e-06	2.76834e-06	2.73726e-06	3.1371e-06	3.00001e-06	2.24535e-06	2.47063e-06	2.08297e-06	2.39426e-06	2.33973e-06	2.56019e-06	2.56612e-06	2.17081e-06	2.56225e-06	2.28235e-06	2.67222e-06	2.32968e-06	1.93971e-06	2.16025e-06	2.11361e-06	2.35905e-06	2.20098e-06	2.18849e-06	1.91579e-06	2.00716e-06	2.15936e-06	2.2707e-06	2.52485e-06	2.93022e-06	2.59656e-06	2.65223e-06	2.911e-06	2.53677e-06	2.47851e-06	2.24945e-06	2.33425e-06
Neuron_119	2.65183e-06	2.61307e-06	2.31125e-06	1.87844e-06	1.64077e-06	1.75258e-06	1.85958e-06	1.76706e-06	1.46341e-06	1.78882e-06	1.74686e-06	1.73768e-06	1.45185e-06	1.67333e-06	1.59988e-06	1.75905e-06	1.72728e-06	1.91012e-06	1.87141e-06	1.76388e-06	1.91612e-06	2.57694e-06	2.64189e-06	2.63438e-06	2.85526e-06	2.56239e-06	2.71888e-06	2.4848e-06	2.14489e-06	2.2127e-06	2.04027e-06	2.81616e-06	2.76509e-06	2.0736e-06	1.8532e-06	1.58407e-06	1.40285e-06	1.48004e-06	1.55997e-06	1.91489e-06	2.10145e-06	2.18527e-06	2.84903e-06	3.06056e-06	2.60668e-06	2.11792e-06	1.89938e-06	2.29269e-06	2.77314e-06
Neuron_120	2.82206e-06	2.57021e-06	3.91732e-06	2.15979e-06	2.10847e-06	1.93475e-06	1.54446e-06	1.73016e-06	1.60973e-06	1.89202e-06	1.65927e-06	1.93821e-06	1.70314e-06	1.68856e-06	1.72436e-06	1.78504e-06	1.60918e-06	1.8988e-06	1.38614e-06	1.50576e-06	1.43495e-06	1.80134e-06	1.77446e-06	1.72111e-06	1.93018e-06	1.90213e-06	2.12109e-06	1.9792e-06	1.71018e-06	1.96761e-06	1.41457e-06	1.4161e-06	1.42127e-06	1.38199e-06	1.53983e-06	1.63957e-06	2.15891e-06	1.73059e-06	1.76936e-06	1.68988e-06	1.99202e-06	2.43542e-06	1.84578e-06	1.88884e-06	1.97446e-06	1.51259e-06	1.41805e-06	1.49953e-06	1.61368e-06
Neuron_121	2.76366e-06	3.30657e-06	2.33861e-06	2.3113e-06	1.77245e-06	1.45467e-06	1.83761e-06	1.65165e-06	1.39438e-06	1.71162e-06	1.60292e-06	1.25008e-06	1.24777e-06	1.62114e-06	1.84613e-06	2.21567e-06	1.8086e-06	2.44886e-06	1.94176e-06	2.35955e-06	2.11973e-06	2.63038e-06	2.56344e-06	2.2008e-06	1.86702e-06	1.66456e-06	1.79974e-06	1.38487e-06	2.24639e-06	1.94578e-06	1.51354e-06	1.87778e-06	1.69303e-06	1.81089e-06	2.03165e-06	1.77671e-06	1.91092e-06	1.44285e-06	1.43465e-06	1.87157e-06	1.72137e-06	2.10919e-06	1.70432e-06	1.94994e-06	2.09317e-06	2.07271e-06	1.77634e-06	2.28477e-06	1.87401e-06
Neuron_122	2.96432e-06	3.28617e-06	2.64861e-06	2.96079e-06	3.001e-06	2.84306e-06	2.80786e-06	2.73033e-06	2.79924e-06	2.06432e-06	1.66397e-06	2.00513e-06	2.29479e-06	1.87258e-06	1.83995e-06	1.54898e-06	1.75104e-06	2.06205e-06	1.45882e-06	1.7636e-06	1.54509e-06	1.76679e-06	1.97003e-06	1.98157e-06	1.88444e-06	1.75846e-06	2.10447e-06	1.65143e-06	1.70848e-06	1.75528e-06	1.62111e-06	1.79898e-06	1.88305e-06	1.78672e-06	1.92411e-06	1.91886e-06	2.12342e-06	1.97885e-06	1.92566e-06	2.23434e-06	2.11028e-06	2.08e-06	1.94001e-06	1.85563e-06	2.10114e-06	1.65292e-06	1.68494e-06	1.51873e-06	1.46957e-06
Neuron_123	1.85643e-06	1.59202e-06	2.53135e-06	1.867e-06	1.48065e-06	1.91874e-06	1.42687e-06	1.11439e-06	1.01127e-06	1.61833e-06	1.79749e-06	1.96404e-06	2.21692e-06	1.24092e-06	1.55826e-06	1.56137e-06	1.34995e-06	1.42072e-06	1.11597e-06	1.05291e-06	1.04173e-06	1.7159e-06	1.5664e-06	1.68949e-06	1.31364e-06	1.407e-06	1.4398e-06	1.26526e-06	1.69681e-06	1.33044e-06	1.43193e-06	1.55863e-06	1.50271e-06	1.09965e-06	1.07952e-06	1.12012e-06	9.37443e-07	8.7437e-07	9.84997e-07	1.08247e-06	1.19858e-06	1.15173e-06	1.3249e-06	1.43445e-06	1.54294e-06	1.1809e-06	1.17889e-06	1.07041e-06	1.10736e-06
Neuron_124	2.89575e-06	3.09381e-06	2.43731e-06	1.73604e-06	2.35076e-06	3.04102e-06	3.34024e-06	3.73507e-06	3.07925e-06	3.14215e-06	2.93027e-06	2.20829e-06	2.17295e-06	3.18129e-06	3.31838e-06	3.47808e-06	3.26839e-06	3.48654e-06	3.69534e-06	2.45874e-06	2.3079e-06	2.08327e-06	1.672e-06	1.84415e-06	1.73702e-06	2.02618e-06	1.50027e-06	1.53495e-06	2.21646e-06	2.19043e-06	1.62495e-06	2.07692e-06	2.18557e-06	1.52622e-06	1.95892e-06	2.23523e-06	2.78729e-06	2.65533e-06	2.35704e-06	2.15934e-06	1.81514e-06	2.70581e-06	2.66419e-06	3.05425e-06	3.16364e-06	3.23528e-06	2.97931e-06	3.81346e-06	3.07868e-06
Neuron_125	1.86263e-06	1.30163e-06	1.39855e-06	8.82924e-07	9.40606e-07	1.13565e-06	9.2718e-07	1.48213e-06	2.08762e-06	1.70621e-06	1.50464e-06	1.38649e-06	1.09534e-06	9.80396e-07	1.0348e-06	1.13933e-06	9.74774e-07	1.17907e-06	9.35152e-07	1.7974e-06	1.54808e-06	1.4441e-06	1.4215e-06	1.43296e-06	2.23631e-06	1.87408e-06	1.75375e-06	1.29846e-06	9.83342e-07	1.01605e-06	8.69066e-07	8.36968e-07	9.06427e-07	9.65059e-07	7.76552e-07	9.3456e-07	7.14339e-07	1.19754e-06	1.18854e-06	8.57629e-07	6.91414e-07	1.07013e-06	9.08479e-07	9.29207e-07	7.9634e-07	9.40889e-07	9.06959e-07	1.27141e-06	1.1157e-06
Neuron_126	5.30315e-06	5.31988e-06	3.57039e-06	5.06297e-06	4.36418e-06	3.64122e-06	4.0468e-06	3.64867e-06	4.05363e-06	4.23586e-06	3.4586e-06	3.82705e-06	3.84283e-06	3.1714e-06	3.81665e-06	3.23918e-06	2.08125e-06	2.22057e-06	1.49748e-06	2.77895e-06	3.07277e-06	4.58148e-06	3.60093e-06	4.26444e-06	3.26726e-06	3.35771e-06	3.12942e-06	3.73617e-06	3.83303e-06	4.57448e-06	5.05653e-06	5.40116e-06	4.75752e-06	5.45728e-06	5.36302e-06	4.58297e-06	3.96371e-06	4.01014e-06	4.06683e-06	4.48006e-06	4.29916e-06	3.83383e-06	4.15379e-06	3.92416e-06	3.57601e-06	3.18119e-06	3.63001e-06	2.82329e-06	3.22861e-06
Neuron_127	3.79979e-06	2.42257e-06	2.11907e-06	2.13771e-06	1.99899e-06	3.25289e-06	3.26133e-06	4.40415e-06	5.1621e-06	3.85662e-06	3.41283e-06	3.82145e-06	3.48063e-06	3.37874e-06	3.73145e-06	4.34259e-06	4.61192e-06	3.92708e-06	3.77889e-06	3.52183e-06	2.68451e-06	2.66065e-06	2.75447e-06	2.83302e-06	2.14882e-06	2.3528e-06	2.28284e-06	1.94205e-06	3.10699e-06	1.59439e-06	1.53688e-06	2.07631e-06	1.85755e-06	1.89546e-06	1.70504e-06	1.99051e-06	1.55856e-06	1.47356e-06	1.65609e-06	1.89913e-06	2.18605e-06	2.46909e-06	2.16605e-06	2.37747e-06	3.08765e-06	2.63004e-06	2.55656e-06	3.20801e-06	3.00081e-06
Neuron_128	2.6736e-06	1.61866e-06	1.30954e-06	2.24365e-06	1.86478e-06	1.57496e-06	1.40193e-06	1.53732e-06	1.62416e-06	1.2165e-06	1.3387e-06	1.2518e-06	1.38112e-06	1.26092e-06	1.16253e-06	1.21213e-06	1.52379e-06	3.29027e-06	2.54535e-06	1.3108e-06	1.74409e-06	2.06711e-06	2.23892e-06	2.01737e-06	2.48147e-06	1.56981e-06	1.2785e-06	1.96055e-06	2.22579e-06	2.90138e-06	2.76445e-06	2.44188e-06	2.32758e-06	4.18281e-06	3.6588e-06	2.76296e-06	3.11752e-06	2.20563e-06	2.4469e-06	2.51714e-06	2.14715e-06	1.84619e-06	2.32361e-06	2.32776e-06	2.5229e-06	2.99799e-06	3.20131e-06	3.14251e-06	2.14744e-06
Neuron_129	1.76841e-06	2.01529e-06	3.17661e-06	3.3568e-06	3.58238e-06	2.73932e-06	3.1012e-06	2.08984e-06	1.896e-06	2.15385e-06	2.08285e-06	1.13534e-06	9.79294e-07	1.02332e-06	1.44092e-06	1.86858e-06	1.14529e-06	1.07099e-06	1.13598e-06	7.6732e-07	8.22365e-07	7.93666e-07	1.09181e-06	9.09209e-07	9.20862e-07	1.10774e-06	1.08568e-06	1.19223e-06	1.38502e-06	1.25828e-06	1.48498e-06	1.58805e-06	1.32249e-06	2.44356e-06	1.72364e-06	1.96412e-06	2.35981e-06	2.18277e-06	2.06441e-06	2.23226e-06	2.4741e-06	2.49458e-06	2.2422e-06	2.83188e-06	3.17386e-06	3.4159e-06	3.40628e-06	2.95952e-06	2.54366e-06
Neuron_130	1.37284e-06	2.96861e-06	1.30862e-06	1.96119e-06	1.29905e-06	2.10816e-06	2.80041e-06	2.51512e-06	2.66321e-06	2.29532e-06	2.16544e-06	1.80717e-06	2.00482e-06	1.71953e-06	1.72612e-06	2.14665e-06	2.13337e-06	2.06423e-06	1.37758e-06	8.45868e-07	9.46507e-07	8.56191e-07	7.41378e-07	1.12423e-06	8.86887e-07	7.85351e-07	1.08463e-06	9.82881e-07	7.51659e-07	9.36896e-07	1.04806e-06	1.09257e-06	9.37067e-07	8.08477e-07	8.92192e-07	9.75832e-07	8.43868e-07	8.34733e-07	8.88631e-07	5.89527e-07	6.65106e-07	8.78692e-07	6.70075e-07	7.52516e-07	9.66653e-07	6.25417e-07	6.4598e-07	6.88806e-07	8.10817e-07
Neuron_131	3.3474e-06	2.47011e-06	2.13121e-06	2.02894e-06	2.19555e-06	3.22121e-06	2.97241e-06	2.81205e-06	2.87763e-06	3.1619e-06	2.95428e-06	2.95542e-06	2.84374e-06	3.13227e-06	3.63608e-06	4.23797e-06	4.06336e-06	4.47354e-06	4.36708e-06	4.21901e-06	4.60793e-06	3.80717e-06	3.62758e-06	2.92456e-06	3.61252e-06	3.07111e-06	2.73207e-06	2.78457e-06	3.30562e-06	2.99054e-06	2.77518e-06	2.81e-06	2.89606e-06	2.68588e-06	2.8303e-06	2.93952e-06	2.67857e-06	2.88146e-06	3.04249e-06	2.79124e-06	2.53973e-06	2.74366e-06	2.8347e-06	3.00067e-06	2.91012e-06	2.45072e-06	2.19807e-06	2.24009e-06	2.53563e-06
Neuron_132	4.34383e-06	3.55706e-06	3.64179e-06	2.41928e-06	2.83553e-06	2.38628e-06	2.83479e-06	2.83302e-06	2.4159e-06	2.78455e-06	2.72872e-06	2.57047e-06	2.39079e-06	2.25997e-06	2.43083e-06	2.53356e-06	2.68796e-06	2.68455e-06	2.23082e-06	1.843e-06	1.94761e-06	2.13248e-06	2.15778e-06	2.18984e-06	2.31586e-06	1.86853e-06	2.36745e-06	2.58562e-06	3.10743e-06	3.43265e-06	3.04377e-06	2.82058e-06	2.75353e-06	3.0707e-06	2.4571e-06	2.53533e-06	2.47094e-06	2.61837e-06	2.58843e-06	2.28302e-06	2.30089e-06	2.43317e-06	2.30885e-06	1.88266e-06	2.41562e-06	2.04636e-06	1.91572e-06	2.27941e-06	2.71396e-06
Neuron_133	5.26937e-06	3.33594e-06	2.37293e-06	2.6728e-06	2.58942e-06	3.03856e-06	2.74119e-06	3.25325e-06	2.75338e-06	4.12089e-06	3.53646e-06	2.79118e-06	2.67257e-06	2.95983e-06	3.38207e-06	3.15723e-06	2.94764e-06	3.60155e-06	2.31507e-06	1.63445e-06	1.66222e-06	1.55419e-06	1.8229e-06	2.12878e-06	2.02388e-06	1.50817e-06	1.96217e-06	1.78371e-06	2.07324e-06	2.12028e-06	1.80225e-06	2.08724e-06	1.93345e-06	2.06364e-06	2.69364e-06	2.88188e-06	2.58439e-06	2.66177e-06	2.37345e-06	1.77074e-06	2.9091e-06	2.32038e-06	1.76864e-06	2.58934e-06	2.36951e-06	2.13624e-06	2.27919e-06	2.07388e-06	1.9135e-06
Neuron_134	2.90361e-06	4.66478e-06	2.43732e-06	1.94963e-06	1.7099e-06	1.84336e-06	1.79005e-06	3.31509e-06	2.59921e-06	2.6879e-06	2.48746e-06	1.96202e-06	1.84896e-06	3.11197e-06	3.40491e-06	3.84803e-06	3.78006e-06	3.23307e-06	3.14587e-06	2.96978e-06	2.42507e-06	2.5042e-06	1.97184e-06	1.93481e-06	1.64554e-06	1.83368e-06	1.7064e-06	1.51277e-06	3.41421e-06	2.29833e-06	1.7965e-06	1.73303e-06	2.49365e-06	3.05832e-06	2.5495e-06	3.49921e-06	2.6971e-06	3.22923e-06	3.538e-06	3.30037e-06	3.91741e-06	3.7149e-06	3.88059e-06	3.26017e-06	2.77786e-06	2.96058e-06	2.61502e-06	2.92124e-06	3.38642e-06
Neuron_135	2.6065e-06	2.24842e-06	1.96676e-06	2.0257e-06	1.81139e-06	1.66298e-06	1.28278e-06	1.32433e-06	1.1569e-06	1.70176e-06	1.32133e-06	1.52886e-06	1.37813e-06	1.54362e-06	1.3897e-06	1.31418e-06	1.3482e-06	2.74821e-06	1.8661e-06	1.6311e-06	1.56257e-06	1.59967e-06	1.38152e-06	1.69821e-06	1.55327e-06	1.14197e-06	1.7134e-06	1.60992e-06	2.33446e-06	1.9076e-06	2.32692e-06	2.25572e-06	2.37499e-06	3.73796e-06	2.56642e-06	2.10409e-06	1.72849e-06	1.8336e-06	1.81228e-06	1.99252e-06	1.75645e-06	2.15171e-06	2.14169e-06	1.62259e-06	1.56969e-06	1.30189e-06	1.35626e-06	1.60676e-06	1.48533e-06
Neuron_136	3.49945e-06	5.04428e-06	3.46343e-06	3.04443e-06	2.63087e-06	2.70584e-06	2.69886e-06	3.36856e-06	3.7155e-06	3.84024e-06	3.55342e-06	3.98813e-06	3.94712e-06	4.36581e-06	3.85311e-06	3.72441e-06	3.44908e-06	3.56516e-06	2.53128e-06	2.99443e-06	2.11452e-06	2.47498e-06	2.56765e-06	3.0025e-06	2.44409e-06	2.7465e-06	3.52689e-06	2.50769e-06	3.31029e-06	2.1306e-06	1.71708e-06	2.08613e-06	1.80925e-06	1.75583e-06	2.02817e-06	1.95866e-06	1.6692e-06	2.34305e-06	1.96945e-06	2.41579e-06	2.68431e-06	2.89959e-06	2.07524e-06	1.94176e-06	1.75082e-06	1.90185e-06	1.81765e-06	1.625e-06	1.82178e-06
Neuron_137	3.8918e-06	3.61323e-06	3.16867e-06	3.98017e-06	4.65528e-06	5.16555e-06	4.7238e-06	4.18256e-06	4.9339e-06	4.92253e-06	5.2537e-06	6.42278e-06	6.49807e-06	4.99226e-06	5.21084e-06	4.54849e-06	3.38751e-06	2.86787e-06	2.74321e-06	3.16284e-06	2.71999e-06	3.82374e-06	3.97015e-06	3.16718e-06	3.30949e-06	3.67479e-06	4.28514e-06	3.70531e-06	3.51414e-06	3.18257e-06	1.96758e-06	2.22527e-06	3.03812e-06	2.49963e-06	3.24542e-06	2.97392e-06	2.37154e-06	2.64257e-06	2.21252e-06	2.29777e-06	2.388e-06	2.81392e-06	2.1342e-06	2.25353e-06	1.60475e-06	1.54684e-06	1.45063e-06	1.62709e-06	2.09346e-06
Neuron_138	2.95789e-06	1.85775e-06	2.00152e-06	1.31768e-06	2.15022e-06	1.5747e-06	1.74717e-06	1.31645e-06	1.32499e-06	1.55956e-06	1.73328e-06	1.59651e-06	1.59491e-06	1.97837e-06	1.7338e-06	1.73749e-06	1.34654e-06	1.9425e-06	1.35191e-06	1.82547e-06	1.36179e-06	1.19136e-06	1.23402e-06	1.88335e-06	1.30944e-06	1.24879e-06	1.4856e-06	1.1975e-06	1.87609e-06	2.12903e-06	1.80778e-06	2.0837e-06	3.04024e-06	1.56784e-06	2.27184e-06	1.52368e-06	1.22514e-06	1.42592e-06	1.42669e-06	1.14176e-06	1.6206e-06	1.68831e-06	1.32918e-06	1.16855e-06	1.18423e-06	1.17489e-06	1.14534e-06	1.41524e-06	1.28981e-06
Neuron_139	2.46256e-06	2.40695e-06	2.7984e-06	2.11706e-06	2.88134e-06	3.07991e-06	3.43981e-06	3.07851e-06	3.43164e-06	2.75838e-06	2.75565e-06	2.79856e-06	2.69903e-06	1.47552e-06	1.02108e-06	1.15987e-06	1.61771e-06	1.91064e-06	1.15499e-06	1.20088e-06	1.41257e-06	2.48571e-06	2.76288e-06	2.57792e-06	1.87442e-06	1.79586e-06	1.88766e-06	2.19601e-06	2.26656e-06	2.73576e-06	3.24094e-06	3.13939e-06	2.74083e-06	2.39932e-06	3.49545e-06	4.18948e-06	3.47516e-06	3.32477e-06	3.10684e-06	3.31685e-06	3.74551e-06	3.00133e-06	3.99553e-06	3.63514e-06	3.73971e-06	3.82312e-06	4.1847e-06	3.76823e-06	3.22974e-06
Neuron_140	4.26422e-06	2.15808e-06	1.51768e-06	1.85436e-06	1.21876e-06	1.24433e-06	8.21472e-07	1.80544e-06	1.30938e-06	1.27639e-06	1.11467e-06	1.98853e-06	1.77595e-06	1.32018e-06	1.27929e-06	9.90123e-07	8.79288e-07	1.42652e-06	1.287e-06	1.14584e-06	1.50099e-06	1.78209e-06	1.50778e-06	1.80279e-06	1.1361e-06	9.3466e-07	9.86949e-07	1.18636e-06	1.78545e-06	1.51886e-06	1.34517e-06	1.60405e-06	1.78219e-06	2.35684e-06	1.66604e-06	2.48484e-06	3.27718e-06	3.22068e-06	3.07922e-06	2.48711e-06	3.62115e-06	3.2595e-06	1.88304e-06	2.25963e-06	2.24217e-06	2.36203e-06	2.34821e-06	2.7646e-06	3.09217e-06
Neuron_141	2.08654e-06	2.487e-06	1.72722e-06	1.72293e-06	1.57956e-06	1.98162e-06	2.38581e-06	2.14449e-06	2.09656e-06	2.13267e-06	1.82992e-06	1.96441e-06	1.8459e-06	2.63897e-06	2.5771e-06	2.09947e-06	2.17547e-06	2.21945e-06	1.78111e-06	2.88141e-06	2.24381e-06	1.82006e-06	2.21226e-06	1.8039e-06	1.82102e-06	1.71642e-06	2.85485e-06	1.81986e-06	2.33277e-06	1.72442e-06	1.43275e-06	1.56349e-06	1.8682e-06	1.6631e-06	1.7103e-06	1.41691e-06	1.57546e-06	1.72308e-06	1.99956e-06	2.03738e-06	2.38457e-06	2.15459e-06	2.38422e-06	2.39533e-06	1.6396e-06	1.42568e-06	1.29417e-06	1.40581e-06	1.47715e-06
Neuron_142	2.27378e-06	2.71523e-06	1.88915e-06	1.45961e-06	1.56809e-06	1.52799e-06	2.11963e-06	1.83746e-06	1.84211e-06	1.78418e-06	1.88261e-06	2.06229e-06	2.02686e-06	2.19467e-06	1.69569e-06	1.68687e-06	2.00801e-06	1.74204e-06	1.449e-06	1.51077e-06	1.22528e-06	1.76762e-06	1.81039e-06	1.80495e-06	1.58966e-06	1.56475e-06	1.77268e-06	1.56836e-06	2.20294e-06	2.04317e-06	2.23299e-06	1.99333e-06	2.45002e-06	2.49775e-06	2.79181e-06	2.23562e-06	1.80575e-06	2.19198e-06	2.21488e-06	2.35532e-06	1.96317e-06	2.05332e-06	2.45802e-06	2.67693e-06	2.45734e-06	2.25317e-06	2.13854e-06	1.88067e-06	1.71047e-06
Neuron_143	2.82046e-06	2.03434e-06	3.49159e-06	3.67604e-06	3.26066e-06	3.93819e-06	3.25893e-06	3.94846e-06	2.97525e-06	6.25859e-06	6.24401e-06	5.34074e-06	5.33991e-06	6.40745e-06	5.46377e-06	4.71392e-06	4.16079e-06	5.85647e-06	4.29445e-06	3.61698e-06	3.83199e-06	4.82517e-06	4.53533e-06	3.49507e-06	3.2017e-06	3.83411e-06	4.49012e-06	5.22438e-06	6.15183e-06	6.62918e-06	6.1959e-06	6.46726e-06	6.96009e-06	6.93586e-06	6.56769e-06	5.84979e-06	6.25813e-06	5.61491e-06	5.58241e-06	4.73358e-06	4.3464e-06	4.16443e-06	5.38382e-06	4.91084e-06	5.28006e-06	5.00753e-06	5.04414e-06	4.39524e-06	4.39801e-06
Neuron_144	2.08852e-06	2.24099e-06	2.1686e-06	2.80656e-06	2.29927e-06	2.62429e-06	2.5194e-06	1.87051e-06	2.00986e-06	3.95247e-06	4.22822e-06	4.01326e-06	3.63036e-06	2.60335e-06	1.93539e-06	1.19998e-06	1.21245e-06	1.39797e-06	2.05643e-06	1.62619e-06	9.48548e-07	9.81212e-07	1.09056e-06	1.11246e-06	1.12897e-06	1.25268e-06	1.30573e-06	1.00511e-06	1.48147e-06	1.2635e-06	1.47662e-06	1.27882e-06	1.75023e-06	2.08116e-06	2.90352e-06	2.42865e-06	2.83101e-06	2.72098e-06	2.78363e-06	3.13464e-06	2.65607e-06	2.39989e-06	2.9659e-06	3.53739e-06	3.67819e-06	3.0829e-06	2.87476e-06	1.94862e-06	2.41392e-06
Neuron_145	4.14652e-06	3.66976e-06	2.39347e-06	2.28889e-06	2.31013e-06	2.65916e-06	2.31522e-06	2.62523e-06	2.30435e-06	3.16744e-06	3.45279e-06	3.02899e-06	2.66458e-06	2.73776e-06	2.32946e-06	2.16266e-06	2.79256e-06	2.91651e-06	2.0598e-06	2.07669e-06	2.08423e-06	1.96201e-06	2.03025e-06	2.68532e-06	2.5807e-06	2.61943e-06	3.23413e-06	3.0207e-06	3.73825e-06	2.69972e-06	2.67508e-06	2.84363e-06	2.666e-06	2.72248e-06	2.75054e-06	2.71979e-06	2.3485e-06	2.35961e-06	2.06061e-06	1.96373e-06	2.31564e-06	2.68383e-06	2.28511e-06	1.98118e-06	2.15602e-06	1.89658e-06	1.87596e-06	2.01085e-06	2.223e-06
Neuron_146	1.72614e-06	1.84426e-06	1.53124e-06	1.77717e-06	1.3082e-06	1.68908e-06	1.27288e-06	1.27741e-06	9.59679e-07	1.08735e-06	9.66072e-07	1.63539e-06	1.43555e-06	1.13158e-06	9.92998e-07	1.15746e-06	1.23966e-06	1.88434e-06	1.50467e-06	1.64679e-06	1.67245e-06	1.13033e-06	1.06835e-06	1.20638e-06	1.25006e-06	1.10017e-06	1.18721e-06	9.62794e-07	1.77719e-06	1.24031e-06	9.44078e-07	9.43631e-07	8.65787e-07	8.18431e-07	8.98421e-07	1.11076e-06	8.48144e-07	1.16655e-06	1.27515e-06	1.3254e-06	1.64151e-06	1.65583e-06	1.78543e-06	2.07841e-06	1.85522e-06	1.54263e-06	1.66933e-06	1.9408e-06	1.64863e-06
Neuron_147	3.71939e-06	3.62342e-06	1.99284e-06	1.17247e-06	1.19147e-06	2.6788e-06	1.63519e-06	1.71751e-06	1.30123e-06	1.26335e-06	1.04329e-06	9.67428e-07	1.03796e-06	1.17296e-06	1.15927e-06	1.41549e-06	2.26535e-06	2.06709e-06	2.20589e-06	1.27126e-06	1.10882e-06	1.3209e-06	1.28241e-06	1.32436e-06	1.08915e-06	1.04952e-06	1.40817e-06	1.09746e-06	1.60234e-06	2.37635e-06	1.91706e-06	2.06118e-06	1.81505e-06	1.52361e-06	1.64958e-06	1.56832e-06	1.67096e-06	1.52179e-06	1.63585e-06	1.93617e-06	1.54422e-06	1.42318e-06	1.65205e-06	1.55507e-06	1.27822e-06	1.4644e-06	1.53369e-06	1.07253e-06	1.06082e-06
Neuron_148	2.16017e-06	2.16569e-06	2.08906e-06	2.73288e-06	2.74319e-06	2.85875e-06	2.24515e-06	1.59805e-06	1.27714e-06	1.19013e-06	1.28203e-06	1.26319e-06	1.32217e-06	1.70439e-06	2.10399e-06	2.36714e-06	2.89763e-06	4.09419e-06	3.61725e-06	2.42992e-06	2.44834e-06	1.50832e-06	1.69711e-06	2.00503e-06	1.47791e-06	1.42503e-06	1.71066e-06	1.40377e-06	2.39027e-06	1.76979e-06	1.91375e-06	1.72934e-06	1.45389e-06	2.09954e-06	2.44376e-06	1.92773e-06	1.29959e-06	1.11262e-06	1.23998e-06	1.19052e-06	1.54094e-06	1.22822e-06	1.27206e-06	1.33258e-06	1.59274e-06	1.65546e-06	1.4998e-06	1.24464e-06	1.56987e-06
Neuron_149	2.37371e-06	2.32424e-06	1.80733e-06	1.66398e-06	1.63999e-06	1.79404e-06	1.64939e-06	2.1801e-06	1.34006e-06	2.2153e-06	2.19664e-06	1.47131e-06	1.136e-06	1.32883e-06	1.31214e-06	1.42336e-06	1.38831e-06	1.36375e-06	1.57343e-06	1.26761e-06	1.3268e-06	1.33895e-06	1.4374e-06	2.26538e-06	1.45361e-06	1.59615e-06	2.07589e-06	1.98172e-06	2.63914e-06	2.01739e-06	2.62801e-06	1.76472e-06	2.10364e-06	2.04633e-06	1.98994e-06	2.34425e-06	2.24314e-06	3.21765e-06	3.30264e-06	3.04562e-06	2.98726e-06	2.97087e-06	2.81381e-06	3.1722e-06	2.96079e-06	2.50024e-06	2.73613e-06	2.17261e-06	2.11434e-06
Neuron_150	2.13579e-06	1.86708e-06	1.66922e-06	1.4794e-06	1.73287e-06	1.50064e-06	1.1352e-06	1.17005e-06	1.23615e-06	1.6026e-06	1.56084e-06	1.25202e-06	1.40734e-06	1.87215e-06	2.55901e-06	2.50303e-06	2.17464e-06	2.86787e-06	2.33789e-06	1.95805e-06	2.21611e-06	2.05183e-06	1.47793e-06	1.62759e-06	1.50289e-06	1.48189e-06	1.79363e-06	1.22687e-06	1.61166e-06	1.80304e-06	1.66535e-06	1.9358e-06	1.74444e-06	2.87025e-06	2.70115e-06	2.94774e-06	3.02171e-06	3.418e-06	3.51293e-06	2.89974e-06	2.59028e-06	2.80289e-06	2.2897e-06	2.40043e-06	1.57486e-06	1.45824e-06	1.36283e-06	1.41433e-06	1.65197e-06
Neuron_151	2.69719e-06	3.68037e-06	1.63732e-06	1.10612e-06	1.60015e-06	1.43713e-06	1.97475e-06	1.73305e-06	2.68624e-06	3.36275e-06	3.61228e-06	3.59753e-06	3.4709e-06	3.96549e-06	3.64869e-06	3.88209e-06	3.69895e-06	3.07507e-06	2.41717e-06	2.63398e-06	2.17792e-06	1.55707e-06	1.89229e-06	1.39508e-06	1.59535e-06	1.37744e-06	9.01297e-07	8.05289e-07	9.94697e-07	9.93092e-07	8.39844e-07	8.71087e-07	7.71407e-07	9.47367e-07	7.06246e-07	6.41323e-07	6.56359e-07	1.00777e-06	9.57053e-07	6.70907e-07	7.72689e-07	8.90195e-07	5.8955e-07	8.36894e-07	1.01404e-06	1.17203e-06	1.14632e-06	1.00475e-06	1.324e-06
Neuron_152	3.84417e-06	3.48533e-06	2.67069e-06	2.11178e-06	2.24071e-06	2.0651e-06	1.83256e-06	2.0008e-06	1.60798e-06	2.20086e-06	1.97744e-06	1.78639e-06	1.66348e-06	2.09714e-06	1.75574e-06	1.87892e-06	2.38045e-06	2.92176e-06	2.24793e-06	1.92016e-06	2.73746e-06	3.4672e-06	2.90331e-06	4.35492e-06	3.7556e-06	3.92842e-06	3.86587e-06	3.91838e-06	3.45963e-06	3.07706e-06	3.18557e-06	3.48958e-06	3.09126e-06	2.71188e-06	2.1759e-06	2.05356e-06	2.14072e-06	2.63647e-06	2.29074e-06	2.89721e-06	3.61552e-06	3.31378e-06	3.28322e-06	3.00695e-06	2.69114e-06	2.62591e-06	2.56624e-06	3.06434e-06	3.78814e-06
Neuron_153	4.4489e-06	3.50528e-06	3.27039e-06	2.02477e-06	1.99842e-06	1.31257e-06	1.21942e-06	1.00598e-06	1.42359e-06	1.50906e-06	1.97475e-06	2.16118e-06	2.07065e-06	2.21926e-06	2.59132e-06	2.68119e-06	2.80729e-06	2.56905e-06	2.26928e-06	2.39657e-06	1.54459e-06	1.45999e-06	1.75204e-06	1.29162e-06	1.41948e-06	1.44632e-06	1.24232e-06	1.4351e-06	2.95004e-06	2.4263e-06	2.3907e-06	2.32346e-06	2.92003e-06	2.47364e-06	2.58997e-06	2.10064e-06	2.78397e-06	3.25587e-06	3.25459e-06	3.31926e-06	2.58305e-06	2.71554e-06	3.3049e-06	2.71811e-06	2.78854e-06	2.24117e-06	2.28789e-06	2.72489e-06	2.2794e-06
Neuron_154	2.61834e-06	1.93764e-06	1.65152e-06	1.58626e-06	1.38411e-06	1.89614e-06	2.57223e-06	2.35711e-06	1.505e-06	2.16942e-06	2.26532e-06	1.18044e-06	1.21106e-06	1.54704e-06	1.76534e-06	1.4514e-06	1.77878e-06	1.1608e-06	1.06777e-06	1.08778e-06	1.0871e-06	1.06353e-06	1.52145e-06	1.09132e-06	1.58475e-06	1.2194e-06	1.13804e-06	1.10979e-06	1.54757e-06	1.02836e-06	9.02914e-07	1.15312e-06	1.04075e-06	1.24518e-06	8.43216e-07	9.81148e-07	8.1042e-07	9.94874e-07	8.86866e-07	8.93115e-07	1.11757e-06	1.25041e-06	9.15934e-07	9.49025e-07	9.96247e-07	8.60416e-07	8.14012e-07	1.16926e-06	1.21428e-06
Neuron_155	3.36892e-06	1.6647e-06	1.38184e-06	1.13449e-06	1.46955e-06	2.23945e-06	1.21129e-06	1.29965e-06	1.30236e-06	1.05649e-06	7.54684e-07	1.46581e-06	1.28952e-06	1.7494e-06	1.01224e-06	8.10266e-07	1.20552e-06	1.92307e-06	9.98568e-07	1.17317e-06	1.81177e-06	1.18786e-06	1.10473e-06	1.52315e-06	1.22574e-06	1.0062e-06	1.13516e-06	1.10781e-06	1.65735e-06	1.71285e-06	2.04579e-06	2.04467e-06	1.79752e-06	9.95445e-07	1.80846e-06	1.84921e-06	7.77025e-07	1.94032e-06	1.914e-06	1.86317e-06	1.42007e-06	1.2621e-06	1.56621e-06	2.03023e-06	1.78596e-06	1.28264e-06	1.30736e-06	1.46329e-06	1.97704e-06
Neuron_156	2.2085e-06	2.02054e-06	1.77199e-06	2.21431e-06	2.77805e-06	1.44205e-06	1.57601e-06	1.35663e-06	1.19841e-06	1.26788e-06	1.16515e-06	1.43304e-06	1.40029e-06	1.7623e-06	1.99121e-06	1.874e-06	1.84649e-06	2.02003e-06	2.59149e-06	1.9882e-06	1.91529e-06	1.70222e-06	1.6717e-06	1.53683e-06	1.36667e-06	1.31327e-06	1.6165e-06	1.31426e-06	1.70175e-06	1.42132e-06	1.18726e-06	1.55811e-06	1.54564e-06	2.00227e-06	1.61499e-06	1.71834e-06	1.6931e-06	1.45134e-06	1.59389e-06	1.29378e-06	1.81142e-06	1.37824e-06	1.32144e-06	1.70133e-06	1.3881e-06	1.17314e-06	1.14793e-06	1.10745e-06	1.06546e-06
Neuron_157	3.81182e-06	3.74731e-06	2.63214e-06	2.42359e-06	3.0428e-06	3.59984e-06	2.56169e-06	2.76218e-06	2.06014e-06	1.8826e-06	1.93346e-06	1.96807e-06	1.94657e-06	2.75348e-06	3.30172e-06	3.60974e-06	4.25977e-06	3.60367e-06	3.6768e-06	2.58763e-06	2.59439e-06	1.8612e-06	2.12239e-06	2.472e-06	2.33911e-06	2.53434e-06	2.49998e-06	1.90496e-06	2.86382e-06	2.44146e-06	1.93094e-06	1.73223e-06	1.85679e-06	1.62143e-06	1.69668e-06	1.76118e-06	2.15505e-06	2.2e-06	2.28644e-06	2.49418e-06	2.62792e-06	2.532e-06	2.84568e-06	3.3398e-06	3.8596e-06	3.56281e-06	3.20654e-06	4.21542e-06	4.69101e-06
Neuron_158	1.99807e-06	2.29254e-06	1.73699e-06	1.70432e-06	1.24097e-06	1.29797e-06	1.72007e-06	1.3933e-06	1.50432e-06	1.96697e-06	2.01146e-06	1.90623e-06	1.5477e-06	1.35752e-06	1.14285e-06	1.21557e-06	1.36129e-06	1.91234e-06	2.28324e-06	1.93608e-06	1.48784e-06	1.4748e-06	1.63144e-06	1.48758e-06	1.29443e-06	1.1502e-06	1.52633e-06	1.81671e-06	2.76419e-06	2.78914e-06	2.3742e-06	3.15043e-06	2.19626e-06	2.34768e-06	1.55105e-06	1.21003e-06	1.06899e-06	1.22548e-06	1.09714e-06	1.32923e-06	1.2845e-06	1.42341e-06	1.13961e-06	1.22909e-06	1.81381e-06	1.24941e-06	1.27915e-06	1.48806e-06	1.9118e-06
Neuron_159	3.66963e-06	3.04649e-06	2.75548e-06	1.98603e-06	2.75047e-06	2.90563e-06	2.75294e-06	3.25771e-06	3.54159e-06	3.94672e-06	3.78956e-06	4.19777e-06	4.46051e-06	4.69275e-06	4.71185e-06	4.05422e-06	3.34716e-06	3.26612e-06	2.24289e-06	2.43675e-06	2.62092e-06	3.34876e-06	3.33999e-06	3.87375e-06	2.72449e-06	3.26794e-06	3.23834e-06	3.68106e-06	5.14062e-06	5.20049e-06	5.09299e-06	4.58966e-06	4.59924e-06	3.2409e-06	3.35234e-06	3.2244e-06	2.99963e-06	3.32618e-06	3.13483e-06	3.00996e-06	2.70364e-06	3.13631e-06	2.49124e-06	2.49478e-06	2.57924e-06	2.43214e-06	2.27898e-06	2.19029e-06	2.39488e-06
Neuron_160	2.88969e-06	1.90456e-06	1.29135e-06	9.66625e-07	1.22102e-06	9.71308e-07	9.46936e-07	9.61146e-07	1.33515e-06	8.39866e-07	6.87881e-07	7.82888e-07	8.02607e-07	9.35952e-07	1.32939e-06	1.80048e-06	2.21761e-06	2.15364e-06	1.53717e-06	1.52495e-06	1.43279e-06	9.42229e-07	1.53756e-06	2.24389e-06	1.64769e-06	1.89298e-06	2.19844e-06	1.467e-06	1.02417e-06	8.02279e-07	7.94649e-07	7.91878e-07	8.26716e-07	1.68654e-06	1.42568e-06	1.43225e-06	1.28454e-06	1.37869e-06	1.52919e-06	1.3506e-06	8.98361e-07	7.57307e-07	9.03875e-07	7.19994e-07	8.54865e-07	1.1138e-06	1.14246e-06	1.15612e-06	1.42121e-06
Neuron_161	3.77575e-06	1.7198e-06	2.5245e-06	3.13124e-06	3.1794e-06	3.52436e-06	4.03607e-06	3.84229e-06	4.23458e-06	3.17726e-06	3.3105e-06	2.11248e-06	2.0581e-06	2.2783e-06	1.82059e-06	1.41931e-06	1.61684e-06	1.87941e-06	9.62943e-07	9.47982e-07	1.01569e-06	9.6631e-07	9.68814e-07	9.36627e-07	9.78977e-07	1.08889e-06	1.04925e-06	1.00169e-06	1.40959e-06	1.26962e-06	9.67741e-07	1.28204e-06	1.24667e-06	1.26839e-06	9.21391e-07	1.33603e-06	1.3514e-06	2.14789e-06	2.20262e-06	2.72185e-06	2.96632e-06	1.6066e-06	1.82841e-06	1.44412e-06	1.92183e-06	1.8042e-06	2.00523e-06	1.29054e-06	1.63762e-06
Neuron_162	2.12145e-06	2.10464e-06	2.20144e-06	1.42104e-06	1.24008e-06	1.2985e-06	1.19199e-06	1.9582e-06	1.51809e-06	1.43829e-06	1.23474e-06	1.38259e-06	1.53838e-06	2.14909e-06	2.36431e-06	2.49808e-06	2.50363e-06	2.48362e-06	1.77468e-06	1.34078e-06	1.12495e-06	1.44285e-06	1.56304e-06	1.28689e-06	1.06765e-06	1.09884e-06	1.28901e-06	1.33885e-06	1.92007e-06	1.31323e-06	1.00807e-06	1.13031e-06	1.39265e-06	1.79882e-06	1.46064e-06	1.58782e-06	1.45826e-06	1.43999e-06	1.22574e-06	1.16253e-06	1.05906e-06	1.1456e-06	1.10382e-06	1.07744e-06	1.16962e-06	1.18366e-06	1.1951e-06	1.13824e-06	1.59299e-06
Neuron_163	4.00805e-06	3.08488e-06	1.93295e-06	1.72132e-06	1.32051e-06	1.93942e-06	1.63159e-06	1.76334e-06	1.67513e-06	2.59075e-06	2.48861e-06	2.47911e-06	2.39342e-06	2.98339e-06	1.74406e-06	2.3171e-06	2.93151e-06	3.3031e-06	2.47551e-06	2.69064e-06	1.52192e-06	2.02629e-06	2.51059e-06	2.92156e-06	2.46157e-06	2.47932e-06	3.05088e-06	3.617e-06	5.61752e-06	5.17933e-06	5.02509e-06	4.83309e-06	4.54841e-06	5.57046e-06	4.50788e-06	5.19156e-06	5.11257e-06	5.09605e-06	5.13299e-06	3.89784e-06	2.9905e-06	3.00549e-06	2.7674e-06	2.32074e-06	2.78021e-06	3.17362e-06	2.88063e-06	1.83998e-06	1.68579e-06
Neuron_164	3.49662e-06	4.46839e-06	4.0535e-06	2.32437e-06	1.73359e-06	1.24384e-06	1.26439e-06	1.16549e-06	8.97236e-07	1.13586e-06	1.20129e-06	9.9171e-07	1.08696e-06	1.18413e-06	1.48356e-06	1.39486e-06	1.50577e-06	1.84974e-06	1.95564e-06	3.37744e-06	2.75182e-06	1.59428e-06	1.31436e-06	1.94835e-06	1.27949e-06	1.1831e-06	1.09067e-06	1.25004e-06	1.29468e-06	9.75296e-07	9.08952e-07	1.23747e-06	1.11267e-06	1.3535e-06	1.24646e-06	9.50923e-07	1.21049e-06	1.1064e-06	1.19798e-06	2.34137e-06	1.47899e-06	1.34988e-06	2.9178e-06	2.08089e-06	1.90572e-06	1.01179e-06	9.9433e-07	1.25615e-06	1.14271e-06
Neuron_165	3.18855e-06	3.08263e-06	2.48786e-06	1.84661e-06	1.72701e-06	1.50804e-06	1.61704e-06	1.71152e-06	1.50526e-06	1.72272e-06	1.65612e-06	1.63382e-06	1.63722e-06	1.6661e-06	1.57356e-06	1.72246e-06	1.89677e-06	1.93334e-06	2.19673e-06	1.92931e-06	1.7232e-06	1.79366e-06	2.31234e-06	2.40506e-06	2.11082e-06	1.79168e-06	1.70716e-06	1.46745e-06	2.10125e-06	2.00167e-06	1.60635e-06	1.90972e-06	1.75911e-06	1.75019e-06	1.71888e-06	1.4752e-06	1.63068e-06	1.24806e-06	1.31711e-06	1.349e-06	1.53047e-06	1.61774e-06	1.38979e-06	1.49126e-06	1.63703e-06	1.28457e-06	1.17095e-06	1.31212e-06	1.4589e-06
Neuron_166	1.84529e-06	1.79979e-06	1.75546e-06	1.35228e-06	1.94826e-06	1.43913e-06	1.95739e-06	1.76145e-06	1.83583e-06	2.13862e-06	2.48319e-06	1.85164e-06	1.69044e-06	1.6386e-06	1.41726e-06	1.2162e-06	1.2011e-06	1.45907e-06	9.23835e-07	1.12244e-06	1.12849e-06	1.06095e-06	1.00284e-06	1.16561e-06	1.15266e-06	1.06212e-06	1.28398e-06	1.10693e-06	2.02124e-06	1.97753e-06	2.79752e-06	2.5046e-06	2.58232e-06	1.99944e-06	1.49625e-06	1.61884e-06	1.31987e-06	1.25852e-06	1.41492e-06	1.31223e-06	1.20854e-06	1.54972e-06	1.32303e-06	1.41817e-06	1.14383e-06	1.25397e-06	1.29543e-06	1.03736e-06	1.15933e-06
Neuron_167	2.64229e-06	2.25477e-06	1.93414e-06	1.56479e-06	1.6625e-06	1.50312e-06	1.52005e-06	1.36486e-06	1.22294e-06	1.71115e-06	2.04936e-06	1.92684e-06	1.81554e-06	1.98299e-06	2.21303e-06	2.33692e-06	1.79898e-06	2.0155e-06	2.25813e-06	1.84043e-06	2.19063e-06	1.81377e-06	1.75406e-06	1.75732e-06	1.45611e-06	1.17671e-06	1.50578e-06	1.43572e-06	2.57495e-06	1.54206e-06	1.72158e-06	1.46553e-06	1.17683e-06	1.35498e-06	1.228e-06	1.16194e-06	1.01389e-06	1.19963e-06	1.22558e-06	1.11552e-06	1.91011e-06	1.73908e-06	1.88423e-06	1.6203e-06	1.8214e-06	1.4305e-06	1.58158e-06	2.31267e-06	2.7369e-06
Neuron_168	5.09295e-06	2.81745e-06	2.30771e-06	3.83896e-06	3.65831e-06	3.57622e-06	3.66344e-06	4.28676e-06	4.56547e-06	3.88852e-06	3.80107e-06	4.22693e-06	4.38931e-06	4.31277e-06	3.81601e-06	3.71874e-06	4.4923e-06	4.35544e-06	3.48143e-06	3.50135e-06	2.55628e-06	2.22912e-06	2.03657e-06	1.97762e-06	1.95394e-06	1.77416e-06	1.91808e-06	1.2515e-06	3.1355e-06	2.41518e-06	2.21962e-06	2.36046e-06	3.08573e-06	4.1365e-06	4.10214e-06	3.47319e-06	2.91976e-06	2.9678e-06	2.79038e-06	2.01173e-06	2.33392e-06	1.80689e-06	1.31087e-06	1.45669e-06	1.53394e-06	1.42239e-06	1.39675e-06	1.61004e-06	1.51765e-06
Neuron_169	3.08065e-06	1.99226e-06	1.63856e-06	1.41577e-06	1.47304e-06	1.46493e-06	2.20384e-06	3.31399e-06	3.17814e-06	3.03306e-06	3.56267e-06	3.08511e-06	3.71725e-06	4.44984e-06	3.79312e-06	4.0908e-06	4.457e-06	3.39524e-06	2.82953e-06	2.18346e-06	2.45647e-06	3.0304e-06	3.27774e-06	3.09412e-06	3.06639e-06	2.70837e-06	2.91341e-06	2.19446e-06	2.04589e-06	1.49338e-06	1.52633e-06	1.63903e-06	1.68486e-06	1.16934e-06	1.51849e-06	1.4551e-06	1.74857e-06	1.79263e-06	1.95338e-06	1.70926e-06	1.80113e-06	1.98292e-06	2.24664e-06	2.00177e-06	2.54274e-06	2.919e-06	2.80715e-06	2.29808e-06	2.1608e-06
Neuron_170	2.93787e-06	2.27423e-06	2.35277e-06	2.12173e-06	1.89644e-06	2.59145e-06	2.75056e-06	3.58496e-06	3.30087e-06	1.90617e-06	1.83157e-06	1.89827e-06	1.6661e-06	1.63673e-06	1.88968e-06	1.62756e-06	1.84891e-06	1.99734e-06	2.08535e-06	1.74997e-06	1.72658e-06	2.38891e-06	2.06916e-06	3.15179e-06	1.74972e-06	1.73173e-06	1.71229e-06	1.58445e-06	2.19523e-06	2.24089e-06	1.41859e-06	1.66476e-06	1.73409e-06	1.40276e-06	1.72905e-06	1.45599e-06	1.27319e-06	1.65436e-06	1.69694e-06	1.41199e-06	2.12795e-06	2.24078e-06	1.57025e-06	1.88236e-06	1.84956e-06	1.58036e-06	1.60935e-06	1.52624e-06	1.61305e-06
Neuron_171	4.08894e-06	2.31038e-06	1.5674e-06	1.27172e-06	1.29942e-06	1.14042e-06	1.34032e-06	1.27446e-06	1.04208e-06	1.29505e-06	1.26156e-06	1.62879e-06	1.62074e-06	1.85153e-06	2.04071e-06	2.07454e-06	1.31816e-06	1.58559e-06	1.23161e-06	2.17813e-06	1.86415e-06	2.64241e-06	3.1665e-06	3.34535e-06	2.78835e-06	3.23551e-06	2.68952e-06	3.28653e-06	2.36272e-06	2.09731e-06	2.24693e-06	2.12601e-06	1.89096e-06	2.10986e-06	1.48358e-06	1.60481e-06	1.78048e-06	2.04469e-06	1.99585e-06	1.78438e-06	2.01724e-06	2.34786e-06	1.74413e-06	1.39532e-06	1.4565e-06	1.3629e-06	1.32555e-06	1.653e-06	1.8779e-06
Neuron_172	2.44443e-06	2.40758e-06	2.35496e-06	2.72826e-06	2.09336e-06	2.02569e-06	2.25054e-06	1.7796e-06	1.63604e-06	1.96314e-06	1.82812e-06	1.79689e-06	1.62834e-06	2.00759e-06	1.91799e-06	1.71858e-06	1.84134e-06	3.08408e-06	1.94146e-06	1.88908e-06	1.44023e-06	1.95006e-06	2.05372e-06	2.0366e-06	2.51859e-06	1.97033e-06	1.89957e-06	1.51003e-06	2.354e-06	2.04537e-06	1.79966e-06	2.46188e-06	2.86464e-06	1.89012e-06	2.8093e-06	2.63319e-06	3.02698e-06	3.31076e-06	3.28872e-06	3.37655e-06	3.63732e-06	3.68631e-06	2.99919e-06	3.77475e-06	3.48889e-06	3.23486e-06	3.45996e-06	3.47214e-06	2.72281e-06
Neuron_173	3.10677e-06	1.75839e-06	1.53859e-06	1.9609e-06	1.66886e-06	1.33377e-06	1.32148e-06	1.31837e-06	1.0387e-06	1.25888e-06	1.34635e-06	1.31609e-06	1.09356e-06	1.23961e-06	1.18199e-06	1.79138e-06	1.28511e-06	1.28406e-06	8.60006e-07	1.72518e-06	1.10747e-06	1.13404e-06	1.28815e-06	1.29732e-06	1.10252e-06	1.21489e-06	1.16186e-06	1.22952e-06	1.55067e-06	1.48028e-06	1.4827e-06	9.52631e-07	9.08703e-07	1.30707e-06	9.57102e-07	1.21433e-06	1.01447e-06	1.11918e-06	9.88543e-07	1.45465e-06	1.59141e-06	1.61538e-06	2.08625e-06	2.56565e-06	2.65706e-06	1.86941e-06	1.64974e-06	1.94222e-06	2.61936e-06
Neuron_174	1.88485e-06	2.71187e-06	2.1864e-06	2.13022e-06	3.00601e-06	3.18823e-06	2.93238e-06	2.44524e-06	1.71773e-06	1.31133e-06	1.44049e-06	8.17033e-07	8.79819e-07	1.10296e-06	1.85684e-06	1.81098e-06	1.74401e-06	2.29143e-06	1.71135e-06	1.80915e-06	2.22452e-06	1.83783e-06	1.60349e-06	1.70071e-06	1.43469e-06	1.26846e-06	1.05497e-06	1.26779e-06	1.56552e-06	1.43842e-06	1.16373e-06	1.10702e-06	9.78157e-07	1.12024e-06	1.14163e-06	1.01803e-06	8.62479e-07	1.13581e-06	1.04131e-06	1.08813e-06	1.09655e-06	1.04449e-06	1.27743e-06	1.25161e-06	1.33042e-06	8.98861e-07	1.01537e-06	9.29581e-07	7.90577e-07
Neuron_175	2.97104e-06	2.92051e-06	1.77445e-06	1.64557e-06	1.42363e-06	1.7321e-06	1.13641e-06	1.75937e-06	1.40886e-06	1.62165e-06	1.45343e-06	1.48609e-06	1.33014e-06	2.10351e-06	1.98793e-06	1.83183e-06	2.97635e-06	3.66612e-06	2.97481e-06	2.71343e-06	2.65028e-06	2.65116e-06	2.9762e-06	2.33461e-06	2.15427e-06	2.17613e-06	2.03122e-06	2.17102e-06	2.18058e-06	1.34939e-06	1.33383e-06	1.65537e-06	1.59886e-06	1.52662e-06	1.35233e-06	1.82893e-06	1.44303e-06	1.61297e-06	1.48449e-06	2.17961e-06	2.39601e-06	2.0536e-06	1.98866e-06	2.6002e-06	1.72441e-06	1.39223e-06	1.28978e-06	1.44685e-06	1.82418e-06
Neuron_176	3.14836e-06	2.44259e-06	1.95408e-06	2.68647e-06	1.78203e-06	2.4298e-06	1.9782e-06	1.7904e-06	1.51258e-06	1.638e-06	1.76592e-06	1.57042e-06	1.7155e-06	1.71439e-06	1.77896e-06	1.55632e-06	1.64627e-06	1.94232e-06	1.38367e-06	1.24359e-06	1.44614e-06	1.21486e-06	1.38882e-06	2.01343e-06	1.20461e-06	1.42467e-06	1.56268e-06	1.927e-06	2.06791e-06	2.30098e-06	1.55376e-06	1.47641e-06	2.23555e-06	2.86344e-06	2.63639e-06	2.55077e-06	3.04469e-06	2.43644e-06	2.58334e-06	2.31718e-06	2.29791e-06	2.00672e-06	1.92148e-06	2.57837e-06	2.08706e-06	2.25045e-06	2.22376e-06	2.97199e-06	3.51837e-06
Neuron_177	2.9925e-06	2.77724e-06	2.61057e-06	2.51264e-06	2.82826e-06	2.18123e-06	2.33817e-06	2.62716e-06	2.79608e-06	3.43293e-06	3.44837e-06	3.75527e-06	4.02488e-06	3.78855e-06	3.7615e-06	4.46146e-06	4.17458e-06	3.93498e-06	3.56949e-06	4.20285e-06	3.27681e-06	1.53233e-06	1.81315e-06	1.86125e-06	1.93664e-06	1.58564e-06	1.72285e-06	1.42593e-06	2.09354e-06	2.8424e-06	1.54201e-06	1.54437e-06	1.47307e-06	1.18515e-06	1.73669e-06	1.51163e-06	1.20868e-06	1.44033e-06	1.50529e-06	1.5588e-06	2.23314e-06	2.86207e-06	2.68756e-06	2.46331e-06	2.86422e-06	2.44681e-06	2.39469e-06	2.17438e-06	2.68919e-06
Neuron_178	5.38926e-06	3.52619e-06	2.62775e-06	2.61805e-06	2.56597e-06	2.26267e-06	2.04696e-06	2.69941e-06	2.13972e-06	2.66594e-06	2.59913e-06	2.32059e-06	2.03902e-06	2.35039e-06	2.44504e-06	2.50585e-06	2.57925e-06	2.58773e-06	2.43776e-06	1.82001e-06	2.10963e-06	2.0781e-06	2.25185e-06	2.27473e-06	2.5466e-06	1.92992e-06	1.97201e-06	2.07211e-06	2.84455e-06	3.17644e-06	2.08423e-06	2.52713e-06	2.76962e-06	3.08462e-06	3.2269e-06	2.87627e-06	2.69021e-06	2.644e-06	2.65177e-06	2.64821e-06	2.36686e-06	2.62846e-06	2.86437e-06	2.86372e-06	3.81903e-06	3.70079e-06	3.23121e-06	3.66668e-06	4.1078e-06
Neuron_179	1.61908e-06	1.5718e-06	1.41976e-06	1.4526e-06	1.34078e-06	1.45911e-06	1.01013e-06	1.02607e-06	1.03028e-06	1.18936e-06	1.18038e-06	1.11634e-06	1.04393e-06	1.34186e-06	1.20938e-06	1.11479e-06	1.41931e-06	1.26939e-06	1.20654e-06	1.16107e-06	1.40402e-06	1.40354e-06	1.97518e-06	1.79851e-06	1.78778e-06	1.52794e-06	1.43768e-06	1.36523e-06	1.43936e-06	9.99153e-07	7.93934e-07	8.55118e-07	9.27806e-07	1.28952e-06	1.05271e-06	1.56727e-06	1.443e-06	1.60226e-06	1.65629e-06	2.23133e-06	2.26268e-06	2.1506e-06	2.81462e-06	2.76548e-06	2.20352e-06	2.2987e-06	2.21129e-06	2.28421e-06	3.05218e-06
Neuron_180	3.06157e-06	2.82069e-06	2.29227e-06	1.699e-06	1.65919e-06	1.57401e-06	1.62028e-06	1.60861e-06	1.54546e-06	1.92811e-06	1.65646e-06	1.6097e-06	1.37871e-06	1.50934e-06	1.68109e-06	1.86174e-06	2.08087e-06	2.81539e-06	1.93852e-06	1.57018e-06	1.4319e-06	1.61767e-06	1.61943e-06	1.63509e-06	1.4866e-06	1.38052e-06	1.63873e-06	1.36304e-06	2.47027e-06	1.79435e-06	1.41911e-06	1.83225e-06	1.99808e-06	1.53404e-06	1.62773e-06	1.59514e-06	1.41779e-06	1.6375e-06	1.80754e-06	2.02972e-06	2.35987e-06	2.33224e-06	2.9003e-06	2.58872e-06	2.7895e-06	2.31144e-06	2.27508e-06	1.55899e-06	1.62297e-06
Neuron_181	2.41636e-06	2.40608e-06	2.8495e-06	3.23753e-06	2.33831e-06	3.31375e-06	3.2922e-06	3.8422e-06	4.53997e-06	1.79134e-06	1.85657e-06	1.34726e-06	1.68046e-06	1.76162e-06	1.66711e-06	1.29387e-06	1.63953e-06	2.17155e-06	1.6823e-06	1.22891e-06	1.75782e-06	1.42308e-06	1.37633e-06	2.14102e-06	2.29929e-06	2.43027e-06	2.90588e-06	2.53287e-06	2.71904e-06	2.41016e-06	2.51107e-06	2.11134e-06	1.7295e-06	1.76242e-06	1.32494e-06	1.25078e-06	1.56838e-06	1.55857e-06	1.49619e-06	1.98307e-06	2.18964e-06	2.5129e-06	2.10328e-06	3.24921e-06	2.39062e-06	2.54537e-06	2.4765e-06	2.5202e-06	2.08172e-06
Neuron_182	2.57541e-06	2.61099e-06	2.36346e-06	2.56167e-06	3.23387e-06	1.91516e-06	1.87776e-06	1.45191e-06	1.47874e-06	1.4714e-06	1.63964e-06	1.40688e-06	1.49183e-06	1.34905e-06	1.14916e-06	1.34184e-06	1.32618e-06	1.54026e-06	1.17013e-06	1.08242e-06	1.60871e-06	1.43334e-06	1.25251e-06	1.29315e-06	1.44869e-06	1.36696e-06	1.84018e-06	1.76776e-06	2.21508e-06	1.70117e-06	1.57257e-06	1.31828e-06	1.13535e-06	1.22692e-06	1.02368e-06	1.27262e-06	9.63058e-07	1.16168e-06	9.96534e-07	1.40755e-06	1.51309e-06	2.00483e-06	1.22535e-06	1.14906e-06	1.01397e-06	1.3319e-06	1.36305e-06	1.71996e-06	1.28264e-06
Neuron_183	2.97077e-06	3.0173e-06	2.50557e-06	2.68869e-06	2.74334e-06	1.50253e-06	1.53357e-06	1.72584e-06	1.45945e-06	1.83404e-06	1.39257e-06	1.42889e-06	1.46904e-06	1.62697e-06	1.66382e-06	1.49633e-06	1.8202e-06	1.82064e-06	1.58636e-06	1.52528e-06	1.80988e-06	2.09694e-06	1.89553e-06	1.68185e-06	1.43982e-06	1.53098e-06	1.76445e-06	1.40552e-06	2.43205e-06	2.14337e-06	1.75629e-06	2.45671e-06	3.12941e-06	3.01593e-06	2.36944e-06	2.28884e-06	2.07928e-06	1.65092e-06	1.80406e-06	1.3774e-06	1.47304e-06	1.4989e-06	1.37064e-06	1.58742e-06	2.01531e-06	1.87155e-06	2.14344e-06	2.33783e-06	2.60883e-06
Neuron_184	1.89681e-06	1.8336e-06	1.26472e-06	1.02887e-06	1.3994e-06	2.28899e-06	3.07031e-06	3.01961e-06	3.74117e-06	3.22488e-06	3.29996e-06	3.08993e-06	2.66294e-06	1.91742e-06	2.67015e-06	2.4434e-06	2.47597e-06	2.18042e-06	2.058e-06	2.04697e-06	1.42818e-06	1.67817e-06	1.8612e-06	2.12313e-06	1.4669e-06	2.01377e-06	1.67222e-06	1.31102e-06	1.28682e-06	7.22975e-07	9.0611e-07	1.27608e-06	7.53414e-07	5.77882e-07	8.38295e-07	1.10988e-06	1.41144e-06	1.65118e-06	1.85449e-06	8.73022e-07	1.01404e-06	1.04e-06	6.70751e-07	8.16781e-07	1.02517e-06	1.18888e-06	1.28188e-06	1.87958e-06	1.73999e-06
Neuron_185	3.69573e-06	3.23711e-06	3.05307e-06	2.59424e-06	2.77823e-06	2.38244e-06	2.41068e-06	2.60427e-06	2.37798e-06	3.67662e-06	4.00924e-06	3.7352e-06	4.15914e-06	4.55641e-06	4.87987e-06	4.83577e-06	4.00217e-06	4.21916e-06	3.69272e-06	4.63469e-06	3.35462e-06	4.49845e-06	4.5002e-06	4.93332e-06	4.25689e-06	4.59635e-06	4.19718e-06	4.42529e-06	4.50393e-06	4.11429e-06	3.75644e-06	3.68345e-06	3.18592e-06	3.06605e-06	3.38702e-06	3.55364e-06	3.17127e-06	4.20677e-06	4.40184e-06	3.62441e-06	4.11769e-06	4.81754e-06	4.12178e-06	4.22335e-06	3.69043e-06	3.41412e-06	3.31344e-06	3.09105e-06	2.89183e-06
Neuron_186	3.90887e-06	3.2928e-06	3.08948e-06	3.8332e-06	4.9905e-06	4.80393e-06	5.28948e-06	5.4308e-06	5.84595e-06	7.04858e-06	5.83644e-06	4.23013e-06	4.84683e-06	5.01195e-06	4.87758e-06	5.54547e-06	3.63138e-06	3.88053e-06	3.06755e-06	4.03768e-06	4.18848e-06	3.96183e-06	3.93868e-06	4.15015e-06	3.88968e-06	3.50618e-06	3.8411e-06	3.17866e-06	3.00837e-06	2.94216e-06	3.24738e-06	2.72064e-06	2.49733e-06	2.44251e-06	2.57585e-06	2.92989e-06	2.11791e-06	2.47896e-06	2.39742e-06	2.0893e-06	2.28262e-06	2.18065e-06	2.36771e-06	2.53324e-06	2.03417e-06	1.90646e-06	1.95565e-06	1.93769e-06	1.76565e-06
Neuron_187	2.63912e-06	4.77169e-06	3.86178e-06	3.33098e-06	4.15826e-06	4.33171e-06	4.21732e-06	3.97381e-06	4.86328e-06	4.36527e-06	4.04748e-06	4.04599e-06	3.89875e-06	4.12931e-06	4.46312e-06	4.20511e-06	2.63059e-06	3.66154e-06	2.44978e-06	2.0662e-06	1.34374e-06	1.55095e-06	1.42678e-06	2.11875e-06	1.44136e-06	1.43537e-06	1.22373e-06	9.88792e-07	1.58698e-06	1.0849e-06	8.65728e-07	1.29894e-06	1.6614e-06	2.17266e-06	2.10246e-06	1.96141e-06	1.14832e-06	1.43238e-06	1.37231e-06	1.47038e-06	7.71184e-07	7.88155e-07	6.86809e-07	8.31052e-07	1.14887e-06	1.04386e-06	1.24571e-06	9.0355e-07	9.76127e-07
Neuron_188	3.64149e-06	3.02149e-06	3.33375e-06	3.08247e-06	3.20621e-06	3.25472e-06	3.12556e-06	3.13392e-06	2.71985e-06	2.08712e-06	2.15467e-06	2.12948e-06	1.90347e-06	2.44534e-06	2.45078e-06	2.43767e-06	2.7475e-06	3.18133e-06	2.76366e-06	2.61204e-06	3.30272e-06	2.52869e-06	2.47363e-06	1.98972e-06	2.55564e-06	2.39001e-06	2.30072e-06	2.35333e-06	3.10773e-06	3.1944e-06	2.54004e-06	2.59529e-06	3.62717e-06	3.047e-06	2.79712e-06	3.0583e-06	2.88602e-06	2.58034e-06	2.43783e-06	2.896e-06	3.88582e-06	2.9377e-06	2.66023e-06	3.21704e-06	2.98339e-06	2.66694e-06	2.47322e-06	2.5306e-06	2.70569e-06
Neuron_189	2.54322e-06	1.90675e-06	1.53111e-06	1.15094e-06	1.50479e-06	1.5928e-06	2.46275e-06	2.24075e-06	1.91382e-06	1.72906e-06	1.43918e-06	1.07691e-06	1.28916e-06	1.23364e-06	1.33234e-06	1.2193e-06	1.4441e-06	2.16982e-06	1.48883e-06	1.47223e-06	1.3808e-06	1.40485e-06	1.50874e-06	1.58039e-06	1.49e-06	1.32099e-06	2.02397e-06	1.67665e-06	2.08509e-06	2.32005e-06	2.19136e-06	2.45103e-06	2.2741e-06	3.15538e-06	3.32981e-06	3.73919e-06	3.25154e-06	3.39979e-06	3.65233e-06	2.70149e-06	2.44072e-06	1.88833e-06	1.77726e-06	1.46395e-06	2.26021e-06	2.31224e-06	2.18201e-06	1.72746e-06	1.8388e-06
Neuron_190	2.88219e-06	3.91284e-06	3.37935e-06	3.43834e-06	2.49179e-06	2.05493e-06	2.68505e-06	2.84403e-06	2.71923e-06	1.84598e-06	2.15406e-06	2.11117e-06	2.38415e-06	1.97372e-06	3.13915e-06	2.66493e-06	2.83333e-06	2.01518e-06	1.91978e-06	1.43285e-06	1.22111e-06	1.18926e-06	1.25408e-06	1.77618e-06	1.18861e-06	1.02412e-06	1.30464e-06	1.1832e-06	1.50098e-06	1.21706e-06	1.62987e-06	2.21756e-06	1.72524e-06	1.08786e-06	1.06774e-06	1.82149e-06	1.69024e-06	2.44233e-06	2.3147e-06	1.90762e-06	1.98205e-06	1.93836e-06	1.66081e-06	1.36272e-06	1.7079e-06	1.74367e-06	1.66084e-06	1.60042e-06	1.83696e-06
Neuron_191	3.14409e-06	2.67417e-06	2.26893e-06	1.86085e-06	1.95843e-06	1.94679e-06	2.03704e-06	2.16299e-06	2.03666e-06	2.31531e-06	1.89647e-06	2.07131e-06	1.95782e-06	2.26754e-06	2.43667e-06	2.44242e-06	2.58744e-06	3.02765e-06	1.98999e-06	2.06828e-06	2.69651e-06	3.4413e-06	2.66871e-06	3.49671e-06	2.6831e-06	3.3347e-06	4.16297e-06	4.0192e-06	4.29612e-06	3.40843e-06	3.37109e-06	2.91413e-06	3.40933e-06	3.2565e-06	3.39848e-06	4.53657e-06	3.8754e-06	4.56291e-06	4.21992e-06	4.17003e-06	3.13857e-06	4.10664e-06	3.20333e-06	3.79056e-06	3.5553e-06	3.9233e-06	4.0004e-06	3.91081e-06	3.66661e-06
Neuron_192	2.27866e-06	1.64538e-06	1.59991e-06	1.55035e-06	1.32968e-06	1.27837e-06	1.11423e-06	1.09327e-06	1.17447e-06	1.18665e-06	1.58699e-06	1.63129e-06	1.69322e-06	1.27372e-06	1.33345e-06	1.46768e-06	1.59477e-06	2.06217e-06	1.46179e-06	1.60091e-06	1.37765e-06	2.4659e-06	3.31947e-06	3.13972e-06	3.18196e-06	3.17311e-06	3.90054e-06	3.16558e-06	3.06256e-06	3.66326e-06	4.18e-06	3.63188e-06	3.9866e-06	4.92312e-06	4.31184e-06	2.94384e-06	3.92673e-06	4.27805e-06	4.33379e-06	5.15513e-06	5.72273e-06	5.40575e-06	5.64083e-06	5.25288e-06	5.1879e-06	4.43763e-06	4.35503e-06	4.67245e-06	4.45606e-06
Neuron_193	2.18963e-06	1.64246e-06	1.68867e-06	1.70359e-06	1.71434e-06	2.08751e-06	1.68537e-06	1.55728e-06	1.4134e-06	1.4787e-06	1.27806e-06	1.15678e-06	1.38122e-06	1.42133e-06	1.72266e-06	1.61278e-06	1.80693e-06	1.63518e-06	1.3314e-06	1.37931e-06	1.19275e-06	1.62063e-06	1.76234e-06	1.85154e-06	1.36071e-06	1.34978e-06	2.05234e-06	1.432e-06	2.02819e-06	1.68701e-06	1.33969e-06	1.5881e-06	1.53837e-06	1.84206e-06	2.15002e-06	2.01502e-06	1.60938e-06	1.95934e-06	2.00355e-06	1.89558e-06	2.09711e-06	2.16863e-06	2.31931e-06	2.96833e-06	2.10163e-06	1.87917e-06	1.75098e-06	1.53631e-06	1.4901e-06
Neuron_194	3.45947e-06	3.17852e-06	3.09707e-06	2.83757e-06	2.61453e-06	3.65822e-06	3.13784e-06	3.22176e-06	2.61838e-06	3.74963e-06	3.20158e-06	3.86325e-06	3.23634e-06	3.58019e-06	3.43103e-06	3.26875e-06	3.07361e-06	4.31376e-06	3.15491e-06	3.10534e-06	3.31616e-06	3.828e-06	2.95115e-06	3.625e-06	2.32661e-06	3.14137e-06	3.46842e-06	3.98149e-06	3.38512e-06	2.83274e-06	2.69976e-06	2.78071e-06	2.99022e-06	3.18253e-06	2.76049e-06	3.40938e-06	3.29193e-06	3.77589e-06	3.75032e-06	3.38531e-06	3.27231e-06	3.29289e-06	2.50386e-06	2.47673e-06	2.36975e-06	2.12689e-06	2.37529e-06	2.19285e-06	1.98879e-06
Neuron_195	2.80763e-06	2.53798e-06	1.64062e-06	1.61938e-06	1.8106e-06	1.99837e-06	1.99057e-06	2.85135e-06	2.56807e-06	2.42818e-06	1.98809e-06	2.09991e-06	2.07811e-06	2.3577e-06	1.998e-06	2.6145e-06	2.62087e-06	3.06541e-06	1.94037e-06	1.81251e-06	1.20202e-06	1.53582e-06	1.44914e-06	1.31002e-06	1.54912e-06	1.41837e-06	1.40127e-06	1.48447e-06	1.85329e-06	2.00138e-06	1.77902e-06	2.20706e-06	2.66435e-06	2.95882e-06	3.33889e-06	3.1043e-06	2.82929e-06	3.63097e-06	3.43687e-06	3.42302e-06	2.55085e-06	2.72108e-06	2.64995e-06	2.45065e-06	2.18485e-06	2.30159e-06	2.50278e-06	2.45341e-06	1.96545e-06
Neuron_196	2.45048e-06	1.96503e-06	2.26255e-06	3.5678e-06	2.91058e-06	2.99959e-06	2.83967e-06	2.59254e-06	1.90672e-06	2.00347e-06	1.51286e-06	1.25022e-06	1.16758e-06	1.00973e-06	1.07476e-06	8.99494e-07	9.41411e-07	1.41969e-06	9.07697e-07	1.15455e-06	9.42459e-07	1.01846e-06	1.35706e-06	1.15789e-06	1.29728e-06	1.10453e-06	1.3034e-06	1.43287e-06	2.067e-06	3.48926e-06	3.28094e-06	3.32738e-06	3.5263e-06	3.33825e-06	4.12871e-06	4.4254e-06	4.23188e-06	4.01702e-06	4.13988e-06	4.51818e-06	4.51693e-06	3.60326e-06	4.52687e-06	4.78472e-06	4.72319e-06	3.94276e-06	4.30288e-06	3.70983e-06	3.66679e-06
Neuron_197	3.30796e-06	2.68805e-06	2.23872e-06	2.11453e-06	2.18035e-06	2.07688e-06	2.076e-06	2.29839e-06	2.45771e-06	3.29157e-06	4.07172e-06	3.32873e-06	3.40078e-06	3.63096e-06	4.34339e-06	4.7111e-06	4.04738e-06	4.09693e-06	3.83943e-06	3.51338e-06	2.81017e-06	3.41167e-06	2.65488e-06	3.3017e-06	2.67733e-06	3.19489e-06	3.37181e-06	3.05003e-06	4.27731e-06	4.51242e-06	4.15889e-06	3.98726e-06	4.07463e-06	4.6401e-06	3.91769e-06	3.93911e-06	3.94923e-06	3.80774e-06	3.82862e-06	2.9332e-06	3.31413e-06	3.34752e-06	2.52965e-06	2.76776e-06	2.20782e-06	2.19871e-06	2.26109e-06	1.86615e-06	2.11017e-06
Neuron_198	2.73502e-06	3.56653e-06	2.14583e-06	1.88194e-06	1.68797e-06	1.10793e-06	1.17057e-06	1.12522e-06	1.42943e-06	1.33842e-06	1.06362e-06	1.05826e-06	1.23647e-06	1.55298e-06	1.67345e-06	1.54917e-06	1.62772e-06	1.9785e-06	1.13356e-06	1.78617e-06	1.42077e-06	1.81666e-06	1.58019e-06	1.41092e-06	1.2802e-06	1.4146e-06	1.37889e-06	1.16216e-06	2.43611e-06	1.60035e-06	1.28921e-06	1.31401e-06	1.49214e-06	1.10408e-06	1.54809e-06	1.55577e-06	1.2354e-06	1.1685e-06	1.2667e-06	1.20372e-06	1.47733e-06	1.52849e-06	1.53848e-06	1.61684e-06	1.93183e-06	2.32895e-06	2.31975e-06	2.26538e-06	1.81491e-06
Neuron_199	4.16218e-06	5.65047e-06	2.32871e-06	1.9349e-06	1.68239e-06	1.44157e-06	1.82158e-06	2.53549e-06	3.61612e-06	2.50515e-06	2.36079e-06	2.3849e-06	2.31054e-06	1.48913e-06	1.58733e-06	1.65454e-06	1.99106e-06	1.41013e-06	1.24928e-06	1.2325e-06	1.01635e-06	1.0969e-06	1.15964e-06	1.29706e-06	1.2455e-06	1.05539e-06	1.26469e-06	9.96143e-07	1.21343e-06	1.14018e-06	9.90182e-07	1.10535e-06	1.3053e-06	1.54211e-06	1.42235e-06	1.19057e-06	1.10855e-06	1.4343e-06	1.57599e-06	1.30545e-06	1.48117e-06	1.91597e-06	1.27172e-06	1.19194e-06	1.75274e-06	1.81083e-06	1.65635e-06	1.7297e-06	1.49363e-06
Neuron_200	2.27086e-06	1.70504e-06	1.17045e-06	1.00853e-06	8.82834e-07	1.06245e-06	1.39123e-06	2.12093e-06	2.06295e-06	3.01192e-06	2.2459e-06	1.82944e-06	1.70068e-06	2.17346e-06	2.32749e-06	1.93644e-06	2.09027e-06	1.96571e-06	1.73775e-06	9.80349e-07	1.45111e-06	9.46105e-07	9.16533e-07	7.47725e-07	8.54298e-07	8.23557e-07	8.80323e-07	8.17418e-07	1.10538e-06	1.34893e-06	1.71535e-06	2.58763e-06	2.56293e-06	1.87081e-06	1.35328e-06	1.33418e-06	8.67859e-07	1.29037e-06	1.25654e-06	1.0193e-06	9.50784e-07	9.92194e-07	8.43972e-07	1.09701e-06	7.71865e-07	7.85232e-07	7.23973e-07	1.0051e-06	9.89288e-07
Neuron_201	3.32862e-06	2.98032e-06	2.10451e-06	1.68684e-06	1.57973e-06	1.26325e-06	8.58571e-07	1.28739e-06	1.19611e-06	1.95904e-06	2.43267e-06	2.65265e-06	2.9382e-06	2.86967e-06	3.67709e-06	2.93957e-06	3.82115e-06	2.9911e-06	4.62976e-06	5.05912e-06	5.43388e-06	4.97726e-06	4.86371e-06	5.43298e-06	3.96761e-06	3.63071e-06	4.62182e-06	4.27507e-06	2.6549e-06	1.92763e-06	2.08769e-06	2.35954e-06	1.51078e-06	7.12521e-07	8.32133e-07	9.78217e-07	8.20324e-07	1.07035e-06	8.63999e-07	9.11892e-07	1.10781e-06	1.3604e-06	8.82328e-07	8.36164e-07	1.0328e-06	7.35313e-07	6.60256e-07	1.05184e-06	1.05949e-06
Neuron_202	3.31569e-06	3.80453e-06	3.89846e-06	3.2399e-06	3.78427e-06	3.32849e-06	2.60386e-06	3.16113e-06	3.57384e-06	2.88831e-06	3.25179e-06	2.66856e-06	2.80991e-06	3.52919e-06	3.92714e-06	3.97903e-06	4.79759e-06	6.47e-06	5.2295e-06	3.41097e-06	2.86905e-06	1.98539e-06	2.3329e-06	2.23237e-06	2.75919e-06	2.25037e-06	2.53797e-06	2.09829e-06	2.13198e-06	2.01912e-06	1.78258e-06	1.21462e-06	1.23683e-06	1.07238e-06	1.53136e-06	1.32722e-06	1.40241e-06	1.32072e-06	1.23277e-06	1.33079e-06	1.32796e-06	1.68979e-06	1.4053e-06	1.55893e-06	1.69095e-06	1.53437e-06	1.27566e-06	1.29151e-06	1.3473e-06
Neuron_203	2.01252e-06	1.9387e-06	1.56078e-06	1.51691e-06	2.12091e-06	1.36456e-06	1.33051e-06	1.38332e-06	1.26244e-06	1.35406e-06	1.35435e-06	1.44894e-06	1.39448e-06	1.47265e-06	1.31738e-06	1.66053e-06	1.8003e-06	2.60091e-06	1.3586e-06	1.51105e-06	1.94967e-06	1.98582e-06	2.06394e-06	1.63764e-06	1.53114e-06	1.24043e-06	1.80428e-06	1.80009e-06	2.04036e-06	2.54648e-06	1.84412e-06	1.91083e-06	1.5724e-06	1.54881e-06	1.42534e-06	1.37165e-06	1.05248e-06	1.3015e-06	1.23251e-06	1.14046e-06	1.43708e-06	1.27769e-06	1.31439e-06	1.42495e-06	1.23324e-06	1.12837e-06	1.15436e-06	1.05726e-06	1.30277e-06
Neuron_204	3.20122e-06	3.26769e-06	3.6718e-06	3.62744e-06	3.42721e-06	3.77459e-06	3.03698e-06	2.96782e-06	2.85906e-06	3.96659e-06	3.10681e-06	3.24948e-06	2.9269e-06	3.05022e-06	2.65666e-06	2.5582e-06	2.33364e-06	1.99574e-06	1.43711e-06	1.56321e-06	1.8211e-06	2.6817e-06	2.52333e-06	1.96921e-06	1.72595e-06	1.71131e-06	1.93311e-06	1.62049e-06	2.18592e-06	2.14434e-06	1.67198e-06	1.6223e-06	1.92263e-06	1.84712e-06	2.53091e-06	2.87991e-06	3.39319e-06	3.68157e-06	3.72034e-06	3.32686e-06	3.65204e-06	3.35127e-06	2.93781e-06	3.19535e-06	2.76377e-06	2.39574e-06	2.4662e-06	1.84341e-06	2.45889e-06
Neuron_205	3.85967e-06	3.0356e-06	2.06187e-06	1.87175e-06	2.21369e-06	1.57322e-06	1.61724e-06	1.78576e-06	1.67956e-06	1.77295e-06	1.63051e-06	1.54796e-06	1.6531e-06	1.73739e-06	1.61929e-06	1.63365e-06	2.72591e-06	2.71387e-06	1.73327e-06	2.11035e-06	1.55057e-06	2.4e-06	2.23807e-06	2.23771e-06	1.7862e-06	2.24218e-06	2.2736e-06	2.5457e-06	5.282e-06	3.29396e-06	2.57808e-06	2.21958e-06	3.19213e-06	2.92693e-06	2.81874e-06	2.92038e-06	4.19034e-06	3.159e-06	3.1786e-06	2.58057e-06	2.92601e-06	3.2995e-06	2.69211e-06	2.57674e-06	2.38568e-06	2.25789e-06	2.20363e-06	2.58143e-06	2.48964e-06
Neuron_206	3.3789e-06	1.55109e-06	1.0299e-06	6.82002e-07	7.48666e-07	1.06789e-06	1.3746e-06	2.38258e-06	1.90179e-06	1.49156e-06	6.20157e-07	6.90717e-07	5.96266e-07	1.26025e-06	1.65764e-06	9.79899e-07	7.13918e-07	9.23946e-07	1.26045e-06	7.13473e-07	5.88581e-07	7.5499e-07	8.28683e-07	9.41288e-07	8.52011e-07	8.50378e-07	1.64614e-06	1.73371e-06	2.95451e-06	2.22775e-06	2.72159e-06	3.18152e-06	3.34502e-06	3.48205e-06	3.62737e-06	2.89766e-06	2.49277e-06	2.49607e-06	2.64368e-06	2.82508e-06	2.1157e-06	2.02476e-06	2.15317e-06	2.23506e-06	2.40217e-06	2.24761e-06	2.07708e-06	2.2616e-06	2.76839e-06
Neuron_207	3.24556e-06	3.44084e-06	2.74719e-06	2.60391e-06	2.50039e-06	2.94901e-06	3.72342e-06	3.49081e-06	4.28109e-06	3.25849e-06	3.44509e-06	2.84019e-06	2.41107e-06	1.73937e-06	2.02722e-06	1.6862e-06	2.09823e-06	1.77942e-06	1.77059e-06	1.64731e-06	1.41586e-06	2.07894e-06	2.15474e-06	2.03745e-06	1.69133e-06	2.38392e-06	1.87454e-06	1.8537e-06	2.2718e-06	1.49426e-06	1.24452e-06	1.48577e-06	1.35803e-06	1.57262e-06	2.336e-06	1.79722e-06	1.44524e-06	1.32209e-06	1.31957e-06	2.32781e-06	2.10681e-06	2.74235e-06	2.36321e-06	2.21454e-06	1.62749e-06	1.55637e-06	1.46756e-06	1.56278e-06	1.41822e-06
Neuron_208	1.91243e-06	2.58153e-06	3.5682e-06	2.78325e-06	2.42098e-06	2.2639e-06	2.06313e-06	1.98155e-06	1.75543e-06	1.75704e-06	1.49181e-06	1.65845e-06	1.34458e-06	1.4998e-06	1.51479e-06	1.27219e-06	1.42209e-06	1.4664e-06	1.2276e-06	1.35119e-06	1.0542e-06	1.31521e-06	1.2365e-06	1.32525e-06	1.19764e-06	1.41406e-06	1.28207e-06	1.32826e-06	1.69468e-06	1.62649e-06	1.24028e-06	1.28943e-06	1.43461e-06	1.93057e-06	1.69405e-06	2.11466e-06	2.31057e-06	2.96056e-06	2.50593e-06	2.52576e-06	2.63643e-06	3.07807e-06	2.28656e-06	2.24255e-06	2.586e-06	2.83541e-06	2.92681e-06	2.89435e-06	3.07854e-06
Neuron_209	2.41843e-06	2.00861e-06	1.42273e-06	1.19569e-06	1.13677e-06	1.1444e-06	1.15723e-06	1.15902e-06	1.22082e-06	1.58719e-06	1.39726e-06	1.53771e-06	1.64179e-06	1.27062e-06	1.50074e-06	1.32149e-06	1.29222e-06	1.39907e-06	1.05941e-06	1.05719e-06	1.08232e-06	1.40607e-06	1.23397e-06	2.71838e-06	1.79452e-06	2.02528e-06	1.84352e-06	1.95684e-06	1.83004e-06	2.262e-06	2.30931e-06	2.0303e-06	1.48868e-06	1.6906e-06	1.84086e-06	1.71869e-06	2.15396e-06	2.17666e-06	2.03757e-06	2.4072e-06	2.16294e-06	1.88527e-06	2.63074e-06	2.49989e-06	2.2603e-06	1.8805e-06	2.08097e-06	1.63429e-06	1.75689e-06
Neuron_210	2.56485e-06	2.27752e-06	1.89727e-06	1.5422e-06	1.41443e-06	1.53613e-06	1.44499e-06	1.47341e-06	1.38944e-06	1.44627e-06	1.45674e-06	1.87798e-06	1.81215e-06	1.82608e-06	2.57572e-06	2.18983e-06	2.98161e-06	2.17744e-06	2.73466e-06	1.69669e-06	2.5196e-06	2.37245e-06	1.79816e-06	1.89026e-06	2.51134e-06	2.41464e-06	2.45291e-06	1.72127e-06	2.1335e-06	1.59167e-06	1.38009e-06	1.67117e-06	1.54459e-06	1.71348e-06	2.2383e-06	2.13844e-06	1.97902e-06	2.57334e-06	2.49693e-06	1.98936e-06	1.97119e-06	1.7173e-06	2.22132e-06	1.85269e-06	2.10577e-06	1.80632e-06	1.72573e-06	1.90324e-06	1.57923e-06
Neuron_211	4.44854e-06	3.98976e-06	2.79367e-06	2.64254e-06	2.85137e-06	2.18907e-06	2.32344e-06	2.10827e-06	2.74067e-06	2.6249e-06	2.54744e-06	2.2755e-06	2.59221e-06	2.34643e-06	2.32461e-06	2.85882e-06	2.70024e-06	3.57637e-06	1.84096e-06	2.22351e-06	1.77685e-06	2.60633e-06	2.87935e-06	2.74932e-06	2.30395e-06	2.22752e-06	2.19082e-06	2.46897e-06	3.75802e-06	2.42795e-06	2.19548e-06	2.71457e-06	2.90818e-06	2.19826e-06	2.29642e-06	2.08088e-06	1.59301e-06	2.18902e-06	2.15094e-06	2.00622e-06	2.51114e-06	2.56479e-06	2.41606e-06	2.17958e-06	2.62583e-06	2.75356e-06	2.80466e-06	2.55263e-06	2.20932e-06
Neuron_212	2.14355e-06	2.58741e-06	2.10591e-06	2.42695e-06	2.25997e-06	2.57793e-06	2.64052e-06	1.82694e-06	1.22243e-06	1.25023e-06	1.09455e-06	1.12945e-06	1.39186e-06	1.63811e-06	1.70767e-06	1.73029e-06	1.25547e-06	1.70001e-06	1.6015e-06	1.42328e-06	1.8254e-06	1.87552e-06	2.42383e-06	3.65103e-06	2.5996e-06	2.70821e-06	2.78495e-06	1.83868e-06	1.63434e-06	1.38052e-06	1.46761e-06	1.53301e-06	1.31295e-06	1.16549e-06	1.39718e-06	1.40112e-06	1.4504e-06	1.49408e-06	1.70242e-06	1.46007e-06	1.49183e-06	1.97227e-06	1.85024e-06	1.79628e-06	2.10791e-06	1.88475e-06	1.71238e-06	2.33416e-06	1.88926e-06
Neuron_213	3.58915e-06	3.39493e-06	2.38856e-06	2.15741e-06	1.98237e-06	1.98722e-06	1.99616e-06	2.21003e-06	1.8522e-06	2.13744e-06	1.84455e-06	1.84442e-06	1.75523e-06	2.02434e-06	1.8116e-06	1.87148e-06	2.24596e-06	3.05311e-06	1.6334e-06	1.74217e-06	2.00553e-06	1.96349e-06	1.96416e-06	1.90269e-06	2.15428e-06	1.84083e-06	2.23801e-06	1.9654e-06	3.51055e-06	2.36959e-06	1.99566e-06	2.03872e-06	2.17607e-06	2.00321e-06	1.74549e-06	2.04656e-06	1.9411e-06	2.0157e-06	1.97111e-06	2.05637e-06	2.15891e-06	2.01503e-06	2.38761e-06	2.16601e-06	1.82073e-06	1.69887e-06	1.81659e-06	2.15109e-06	1.85695e-06
Neuron_214	2.98961e-06	2.45541e-06	1.88741e-06	1.94016e-06	1.43066e-06	1.66531e-06	1.71343e-06	1.46642e-06	1.43319e-06	2.33114e-06	2.56562e-06	2.47368e-06	2.21282e-06	2.84642e-06	3.277e-06	2.60395e-06	1.84362e-06	2.12596e-06	1.63906e-06	1.62503e-06	1.54415e-06	1.61563e-06	1.63801e-06	1.6577e-06	1.55178e-06	1.4754e-06	1.57717e-06	1.47623e-06	1.83086e-06	1.50539e-06	1.51018e-06	1.66862e-06	1.84598e-06	2.79505e-06	2.31369e-06	2.51681e-06	2.32825e-06	2.35331e-06	2.00361e-06	2.53665e-06	3.31893e-06	3.56453e-06	3.35568e-06	3.33155e-06	2.94851e-06	3.49746e-06	3.47124e-06	5.36701e-06	5.6561e-06
Neuron_215	4.60904e-06	4.70859e-06	2.69555e-06	2.17296e-06	2.64035e-06	1.97481e-06	1.55589e-06	1.80363e-06	2.00307e-06	1.84119e-06	1.48156e-06	1.42758e-06	1.48189e-06	1.56463e-06	1.66773e-06	2.01806e-06	1.52634e-06	3.0049e-06	1.80349e-06	1.61974e-06	1.17216e-06	1.64879e-06	1.77279e-06	1.63303e-06	1.28519e-06	1.27324e-06	1.35165e-06	1.16063e-06	2.48059e-06	1.381e-06	1.62634e-06	1.55756e-06	1.53495e-06	1.64454e-06	1.4009e-06	1.31231e-06	1.31577e-06	1.27155e-06	1.15551e-06	1.27186e-06	1.337e-06	1.55477e-06	1.2928e-06	1.53935e-06	1.89763e-06	1.38125e-06	1.4606e-06	1.56695e-06	1.53843e-06
Neuron_216	1.65125e-06	1.44258e-06	1.50289e-06	1.37341e-06	1.26322e-06	1.34224e-06	1.39558e-06	1.44687e-06	9.81629e-07	1.61481e-06	1.67315e-06	1.95974e-06	2.00525e-06	1.5288e-06	1.15019e-06	1.14286e-06	1.09194e-06	1.39029e-06	1.07587e-06	1.06864e-06	1.23121e-06	1.10407e-06	1.18406e-06	1.59564e-06	1.31798e-06	1.36765e-06	1.28454e-06	1.01437e-06	2.4683e-06	1.62674e-06	2.53404e-06	2.44869e-06	1.82618e-06	2.31792e-06	2.46213e-06	2.49656e-06	2.32769e-06	2.78074e-06	2.79404e-06	2.36863e-06	2.5811e-06	3.00369e-06	2.1707e-06	2.41777e-06	2.60799e-06	2.96274e-06	2.91257e-06	3.62055e-06	3.3284e-06
Neuron_217	1.95014e-06	2.03179e-06	1.97675e-06	1.41478e-06	1.3468e-06	1.29396e-06	1.22292e-06	1.27929e-06	1.23739e-06	1.34803e-06	1.30968e-06	1.2175e-06	1.15267e-06	1.31853e-06	1.53433e-06	1.42751e-06	1.90908e-06	2.22623e-06	1.76951e-06	1.08406e-06	9.89273e-07	1.18381e-06	1.34256e-06	1.55453e-06	1.40019e-06	1.53944e-06	1.31017e-06	1.06205e-06	1.66665e-06	1.42084e-06	1.15616e-06	1.33604e-06	1.34802e-06	1.78098e-06	1.64298e-06	1.28912e-06	1.01339e-06	1.13585e-06	1.07654e-06	1.0902e-06	1.30157e-06	1.3237e-06	1.43057e-06	1.31963e-06	1.33423e-06	1.34734e-06	1.25729e-06	1.22905e-06	1.28118e-06
Neuron_218	3.11384e-06	3.96285e-06	2.96388e-06	2.03476e-06	1.85234e-06	1.70828e-06	1.98079e-06	2.37093e-06	2.61567e-06	1.88204e-06	1.93056e-06	2.15712e-06	1.91567e-06	2.61104e-06	2.8356e-06	2.72061e-06	3.9723e-06	3.32667e-06	3.66634e-06	3.67308e-06	3.80334e-06	3.60083e-06	2.61944e-06	3.50969e-06	2.54257e-06	2.71438e-06	2.51848e-06	3.07627e-06	2.95202e-06	2.53227e-06	2.3669e-06	2.15007e-06	2.12079e-06	1.79393e-06	2.19213e-06	2.47113e-06	3.01602e-06	2.36378e-06	2.28203e-06	2.33961e-06	2.44048e-06	2.53817e-06	2.36277e-06	1.88182e-06	2.11522e-06	1.75197e-06	1.78406e-06	2.42791e-06	2.77188e-06
Neuron_219	4.28125e-06	3.58746e-06	3.47569e-06	1.79632e-06	1.75538e-06	1.72692e-06	1.80298e-06	1.95032e-06	1.62917e-06	2.19779e-06	1.92302e-06	1.71763e-06	1.80481e-06	2.06564e-06	2.08023e-06	2.10122e-06	1.95607e-06	2.77608e-06	2.16352e-06	2.3096e-06	2.19688e-06	1.58776e-06	1.90997e-06	2.62205e-06	1.87023e-06	1.96655e-06	1.9189e-06	2.49115e-06	3.22505e-06	2.81315e-06	2.17953e-06	2.23328e-06	2.33915e-06	2.06499e-06	1.87138e-06	1.5939e-06	1.9431e-06	2.32399e-06	2.04532e-06	1.69793e-06	2.58972e-06	2.24596e-06	1.78649e-06	1.56798e-06	2.02476e-06	1.81516e-06	1.85572e-06	2.37742e-06	1.94319e-06
Neuron_220	2.14939e-06	1.60546e-06	1.87293e-06	1.75777e-06	2.43827e-06	2.62884e-06	2.3628e-06	2.1539e-06	1.99729e-06	2.17542e-06	1.6802e-06	2.397e-06	2.35792e-06	2.50068e-06	2.78251e-06	3.15621e-06	2.34934e-06	2.49564e-06	2.54469e-06	3.0791e-06	2.97675e-06	3.05806e-06	2.63104e-06	1.62997e-06	2.18166e-06	1.63555e-06	1.8118e-06	1.92973e-06	1.92819e-06	3.20028e-06	2.97768e-06	2.62246e-06	2.63432e-06	3.17881e-06	4.35763e-06	4.487e-06	4.19228e-06	4.06511e-06	4.30254e-06	4.18294e-06	3.13111e-06	2.81949e-06	3.77604e-06	3.86068e-06	3.64579e-06	3.80366e-06	3.90723e-06	3.58566e-06	3.96958e-06
Neuron_221	9.38848e-07	8.67637e-07	4.98351e-07	1.13926e-06	1.35588e-06	1.63507e-06	1.07507e-06	1.27832e-06	6.88657e-07	8.15889e-07	7.91247e-07	7.73134e-07	7.79939e-07	1.03698e-06	5.36867e-07	5.50946e-07	4.73916e-07	6.18732e-07	4.9134e-07	7.77479e-07	1.30509e-06	1.40767e-06	1.35971e-06	1.5639e-06	1.44319e-06	1.32e-06	1.3506e-06	9.35897e-07	6.74535e-07	4.9866e-07	7.04005e-07	6.70314e-07	8.73432e-07	1.21574e-06	1.28758e-06	1.90115e-06	1.87611e-06	1.64338e-06	1.57805e-06	1.34762e-06	1.00412e-06	8.86004e-07	6.61218e-07	6.11909e-07	9.48176e-07	1.22714e-06	1.30754e-06	1.11584e-06	5.95583e-07
Neuron_222	2.5856e-06	2.16925e-06	3.20326e-06	2.04324e-06	2.55559e-06	2.0915e-06	2.38084e-06	1.87397e-06	1.48286e-06	1.46407e-06	1.84291e-06	1.4067e-06	1.24995e-06	1.11869e-06	1.34715e-06	1.55824e-06	1.62709e-06	1.94004e-06	1.73208e-06	2.39912e-06	1.67394e-06	2.35242e-06	3.29329e-06	2.86707e-06	2.92158e-06	3.05578e-06	2.29892e-06	2.44784e-06	2.42734e-06	3.62757e-06	3.70148e-06	3.19958e-06	3.42619e-06	2.38293e-06	2.64135e-06	2.90327e-06	2.88388e-06	3.07396e-06	3.55949e-06	3.36465e-06	2.74616e-06	2.39857e-06	2.99241e-06	2.48283e-06	2.88969e-06	2.27681e-06	2.21267e-06	2.19902e-06	1.87375e-06
Neuron_223	2.89129e-06	2.69686e-06	1.63847e-06	1.62838e-06	1.55376e-06	2.14574e-06	2.07515e-06	1.99613e-06	2.09177e-06	2.64739e-06	2.31969e-06	1.48656e-06	1.40091e-06	1.59933e-06	1.57676e-06	1.54559e-06	1.53507e-06	1.81621e-06	1.56426e-06	1.65058e-06	1.72864e-06	2.32716e-06	2.15393e-06	2.1549e-06	1.74043e-06	1.80844e-06	1.82729e-06	1.66932e-06	2.27535e-06	2.01658e-06	1.47306e-06	1.76821e-06	1.91123e-06	1.69143e-06	1.45449e-06	1.59906e-06	1.31941e-06	1.55292e-06	1.78513e-06	1.92624e-06	2.51572e-06	2.78997e-06	2.54692e-06	2.29993e-06	2.18904e-06	1.93848e-06	1.93612e-06	1.57857e-06	1.54322e-06
Neuron_224	4.21306e-06	3.22015e-06	3.52401e-06	4.32775e-06	4.5472e-06	3.11696e-06	3.65239e-06	3.23234e-06	2.367e-06	3.06203e-06	2.49289e-06	2.36289e-06	1.98035e-06	2.41915e-06	2.29556e-06	2.34687e-06	2.1416e-06	3.11447e-06	2.74832e-06	3.12732e-06	1.98038e-06	2.10749e-06	2.64798e-06	2.6209e-06	2.75848e-06	2.76533e-06	2.44932e-06	1.8515e-06	2.22192e-06	2.30442e-06	1.6593e-06	1.76845e-06	2.02079e-06	2.15704e-06	3.45136e-06	3.82584e-06	3.05791e-06	3.73694e-06	3.85399e-06	4.60242e-06	4.38723e-06	4.09012e-06	4.434e-06	5.17202e-06	3.52773e-06	3.44065e-06	4.09478e-06	3.79416e-06	3.70249e-06
Neuron_225	2.99486e-06	2.74648e-06	2.19119e-06	2.12057e-06	2.07733e-06	2.39696e-06	2.06085e-06	1.70972e-06	1.59567e-06	1.75244e-06	1.71708e-06	1.65341e-06	1.50991e-06	1.48088e-06	1.59267e-06	1.71588e-06	1.70247e-06	2.14191e-06	1.36434e-06	1.84239e-06	1.88078e-06	2.00666e-06	2.04699e-06	1.96311e-06	1.87302e-06	1.54904e-06	1.86524e-06	1.59049e-06	2.16515e-06	2.20948e-06	1.7586e-06	1.85883e-06	2.26266e-06	2.28859e-06	3.28909e-06	3.59634e-06	2.94038e-06	3.05857e-06	2.92073e-06	2.08653e-06	2.43019e-06	2.42143e-06	1.80735e-06	1.42874e-06	1.67429e-06	1.37213e-06	1.33806e-06	1.63624e-06	1.59058e-06
Neuron_226	3.5479e-06	3.42361e-06	2.49676e-06	1.95361e-06	2.17967e-06	2.04153e-06	1.7572e-06	2.2127e-06	2.2754e-06	3.28305e-06	2.83357e-06	3.6073e-06	3.68016e-06	4.45849e-06	3.75572e-06	3.96294e-06	2.83324e-06	4.28383e-06	3.21364e-06	2.74222e-06	3.25489e-06	2.55981e-06	2.24685e-06	2.85123e-06	2.37054e-06	2.21325e-06	2.19284e-06	2.58475e-06	2.35739e-06	2.59097e-06	2.5912e-06	2.39405e-06	2.14922e-06	1.6405e-06	1.94361e-06	1.94554e-06	1.83906e-06	2.35053e-06	2.26425e-06	2.06529e-06	2.47452e-06	2.22792e-06	2.41967e-06	2.00394e-06	2.76385e-06	2.51859e-06	2.7613e-06	3.12358e-06	2.36696e-06
Neuron_227	2.76417e-06	3.5851e-06	1.90869e-06	2.10283e-06	1.92055e-06	2.45532e-06	1.37305e-06	1.7106e-06	1.36425e-06	1.37757e-06	1.35042e-06	1.34436e-06	1.36502e-06	1.91045e-06	1.65094e-06	1.44847e-06	1.42354e-06	1.77091e-06	1.55739e-06	1.59254e-06	1.32987e-06	1.64041e-06	1.65772e-06	1.59901e-06	1.54246e-06	1.87613e-06	1.91447e-06	2.05863e-06	1.917e-06	1.52759e-06	1.39591e-06	1.4711e-06	1.19388e-06	1.19609e-06	1.15371e-06	1.42387e-06	1.46723e-06	1.45864e-06	1.52683e-06	1.46371e-06	1.59496e-06	1.43254e-06	1.16891e-06	1.14745e-06	1.28657e-06	1.17129e-06	1.07753e-06	1.19811e-06	1.16426e-06
Neuron_228	3.8757e-06	2.85535e-06	2.33651e-06	1.96484e-06	1.69019e-06	1.7701e-06	1.79261e-06	1.95498e-06	1.54922e-06	2.40189e-06	2.17351e-06	1.96113e-06	1.74895e-06	2.20118e-06	2.19876e-06	2.10343e-06	2.15071e-06	3.12828e-06	2.43022e-06	2.06319e-06	1.84333e-06	1.9187e-06	1.85786e-06	2.38836e-06	2.04714e-06	1.62478e-06	2.01669e-06	1.71223e-06	2.03806e-06	2.258e-06	1.76127e-06	2.08976e-06	2.80368e-06	2.76929e-06	3.68498e-06	2.38208e-06	2.43891e-06	3.25888e-06	3.09435e-06	3.35645e-06	2.75579e-06	3.67675e-06	3.11853e-06	3.59665e-06	2.79586e-06	2.34295e-06	2.34221e-06	2.52497e-06	1.90854e-06
Neuron_229	1.80735e-06	2.17905e-06	3.06146e-06	1.67134e-06	2.1635e-06	1.06218e-06	1.20847e-06	1.00202e-06	1.16315e-06	1.26055e-06	1.13135e-06	1.45059e-06	1.3184e-06	1.16144e-06	1.34126e-06	1.75e-06	2.5002e-06	3.32829e-06	2.96412e-06	2.35332e-06	3.3628e-06	3.1986e-06	2.50766e-06	2.02662e-06	3.08312e-06	1.98826e-06	2.6328e-06	3.10271e-06	2.97651e-06	4.732e-06	4.0068e-06	3.87873e-06	3.72634e-06	3.88405e-06	4.13366e-06	3.02432e-06	3.18389e-06	3.11031e-06	3.36967e-06	3.33064e-06	2.15162e-06	1.8477e-06	2.66121e-06	2.88145e-06	3.33184e-06	3.09265e-06	3.00542e-06	3.2629e-06	3.76838e-06
Neuron_230	2.63546e-06	2.30891e-06	2.44122e-06	3.1969e-06	3.66747e-06	4.79046e-06	3.82082e-06	3.29382e-06	2.43288e-06	2.50211e-06	2.35964e-06	1.83594e-06	1.79104e-06	3.09566e-06	3.90693e-06	4.19615e-06	4.92099e-06	5.63778e-06	5.67129e-06	5.59385e-06	4.09225e-06	3.90305e-06	3.4373e-06	2.20461e-06	1.82619e-06	1.55327e-06	1.30439e-06	1.00925e-06	2.42933e-06	2.32349e-06	3.14999e-06	2.60326e-06	2.64826e-06	2.50988e-06	2.43102e-06	2.46738e-06	1.88443e-06	1.79638e-06	2.09288e-06	1.43072e-06	1.51788e-06	1.40663e-06	1.15749e-06	9.97969e-07	6.85309e-07	6.91462e-07	6.32819e-07	8.75782e-07	9.73057e-07
Neuron_231	2.80023e-06	1.46603e-06	1.45599e-06	1.85052e-06	1.18299e-06	1.70146e-06	2.08641e-06	1.34673e-06	1.09994e-06	1.06299e-06	1.02794e-06	1.18864e-06	1.07041e-06	1.20488e-06	1.16876e-06	1.05384e-06	1.25805e-06	1.23253e-06	1.37103e-06	1.10781e-06	1.31986e-06	1.66297e-06	2.20786e-06	2.09886e-06	1.68952e-06	1.93223e-06	2.28553e-06	2.28129e-06	2.06223e-06	2.6265e-06	2.77309e-06	3.27429e-06	3.19375e-06	3.25125e-06	2.34577e-06	2.3385e-06	2.76658e-06	2.98775e-06	3.02615e-06	1.88946e-06	1.83742e-06	1.63233e-06	1.44254e-06	1.15577e-06	9.7438e-07	9.36419e-07	8.73305e-07	1.06812e-06	1.04113e-06
Neuron_232	3.8629e-06	2.55698e-06	2.32508e-06	2.40409e-06	2.00303e-06	2.69886e-06	3.08745e-06	3.03235e-06	2.47302e-06	1.91119e-06	1.67836e-06	1.61981e-06	1.64978e-06	1.78252e-06	1.97084e-06	1.9941e-06	2.77585e-06	3.92881e-06	2.52354e-06	2.81413e-06	1.9628e-06	1.83608e-06	2.06994e-06	2.00835e-06	1.86275e-06	1.49205e-06	2.11573e-06	1.60565e-06	2.14019e-06	2.33254e-06	2.06087e-06	2.33681e-06	2.13608e-06	1.99449e-06	1.74192e-06	1.7233e-06	1.92294e-06	1.78992e-06	2.08161e-06	1.56662e-06	2.15136e-06	1.84124e-06	1.72416e-06	2.07439e-06	2.12451e-06	2.05476e-06	2.16871e-06	2.23314e-06	1.96374e-06
Neuron_233	2.57535e-06	1.92731e-06	1.70566e-06	1.53448e-06	1.35928e-06	2.10968e-06	2.57306e-06	3.07696e-06	3.27537e-06	3.15132e-06	3.16335e-06	3.06693e-06	3.09563e-06	2.60346e-06	2.75181e-06	2.73505e-06	3.83033e-06	2.69525e-06	4.08501e-06	2.58402e-06	3.05423e-06	3.04444e-06	2.33667e-06	2.03323e-06	2.16463e-06	1.72655e-06	2.09302e-06	2.37432e-06	2.42469e-06	2.53747e-06	2.00531e-06	1.92097e-06	2.09945e-06	2.47738e-06	2.89337e-06	3.14678e-06	2.29137e-06	1.67753e-06	1.79088e-06	1.50716e-06	1.47267e-06	1.45051e-06	1.53571e-06	1.29016e-06	1.26511e-06	1.13203e-06	1.10181e-06	1.30448e-06	1.05941e-06
Neuron_234	2.42314e-06	2.40614e-06	1.6318e-06	2.40768e-06	1.85894e-06	2.17421e-06	2.80834e-06	3.75707e-06	3.79707e-06	4.48085e-06	4.15761e-06	3.60354e-06	3.58151e-06	3.06366e-06	2.47245e-06	1.93986e-06	1.85124e-06	1.4682e-06	1.5969e-06	1.53928e-06	1.80706e-06	1.49702e-06	1.64044e-06	1.72748e-06	1.71214e-06	1.58741e-06	1.70145e-06	1.3894e-06	1.7151e-06	1.28866e-06	1.31093e-06	1.35252e-06	1.32518e-06	1.4274e-06	1.26144e-06	1.27036e-06	1.24788e-06	1.2911e-06	1.35814e-06	2.1093e-06	2.41002e-06	1.98033e-06	2.40836e-06	3.04283e-06	2.15846e-06	2.31737e-06	2.2696e-06	2.59003e-06	2.72906e-06
Neuron_235	2.75256e-06	2.18051e-06	2.50807e-06	2.03767e-06	2.01e-06	1.44402e-06	1.65155e-06	1.88808e-06	2.44901e-06	3.05478e-06	2.8373e-06	2.98141e-06	3.47333e-06	3.99101e-06	3.55396e-06	4.17921e-06	4.22692e-06	4.43214e-06	3.91525e-06	3.35518e-06	4.12688e-06	2.81116e-06	2.96918e-06	3.00866e-06	3.47343e-06	2.48501e-06	3.48589e-06	2.98035e-06	2.68105e-06	3.40061e-06	3.00413e-06	3.49602e-06	3.04747e-06	2.65917e-06	3.43397e-06	3.77712e-06	3.45308e-06	3.1957e-06	3.44059e-06	3.14558e-06	2.46131e-06	2.6997e-06	3.24404e-06	3.67552e-06	2.88948e-06	3.11688e-06	3.0674e-06	3.43671e-06	3.25036e-06
Neuron_236	3.64254e-06	3.22349e-06	2.0325e-06	1.67938e-06	1.42729e-06	1.34996e-06	1.41814e-06	1.51102e-06	1.128e-06	1.23936e-06	1.17528e-06	1.2035e-06	1.11423e-06	1.30744e-06	9.46522e-07	1.0446e-06	1.1474e-06	1.50316e-06	1.79216e-06	1.1947e-06	1.08156e-06	1.15481e-06	1.58471e-06	1.51879e-06	1.28388e-06	1.54263e-06	1.80051e-06	1.762e-06	2.18463e-06	1.2075e-06	1.47548e-06	1.38354e-06	1.72195e-06	1.76261e-06	1.33385e-06	1.19141e-06	1.53105e-06	1.81779e-06	1.9587e-06	1.9407e-06	2.22638e-06	2.73478e-06	2.52077e-06	2.0124e-06	2.20457e-06	2.02441e-06	2.00406e-06	2.32044e-06	2.43136e-06
Neuron_237	2.07885e-06	3.1567e-06	1.49099e-06	1.21215e-06	1.12151e-06	2.07166e-06	1.82775e-06	1.87248e-06	9.72658e-07	1.00893e-06	7.86513e-07	7.5233e-07	9.56923e-07	1.02368e-06	1.36837e-06	1.4534e-06	1.47615e-06	1.33479e-06	1.50774e-06	9.67458e-07	6.91786e-07	9.43333e-07	1.14936e-06	1.20467e-06	1.3943e-06	1.80711e-06	2.05378e-06	2.07283e-06	2.69681e-06	3.42839e-06	2.88561e-06	3.25274e-06	2.75788e-06	3.29064e-06	3.73193e-06	3.89507e-06	4.45591e-06	5.14728e-06	5.2529e-06	5.52307e-06	4.76016e-06	4.90642e-06	4.75125e-06	4.63642e-06	5.13035e-06	5.10713e-06	4.7158e-06	4.49622e-06	4.11332e-06
Neuron_238	2.12283e-06	2.12188e-06	2.01218e-06	2.98743e-06	3.22063e-06	3.34588e-06	2.39691e-06	2.56936e-06	2.13999e-06	2.21111e-06	1.98229e-06	1.37928e-06	1.39745e-06	1.57577e-06	1.29461e-06	1.33248e-06	1.72023e-06	2.68597e-06	1.34553e-06	1.12167e-06	1.06472e-06	1.63777e-06	1.85512e-06	1.86462e-06	1.94086e-06	1.76992e-06	1.34305e-06	1.37533e-06	1.63275e-06	1.15179e-06	1.05873e-06	1.13374e-06	1.20223e-06	1.36924e-06	1.33759e-06	1.52567e-06	1.06928e-06	1.28832e-06	1.33848e-06	1.05318e-06	1.19969e-06	1.46872e-06	1.15263e-06	1.20875e-06	1.36077e-06	1.06388e-06	9.68993e-07	1.13902e-06	1.42577e-06
Neuron_239	4.06495e-06	3.69236e-06	2.69181e-06	2.25508e-06	2.33691e-06	2.42349e-06	1.976e-06	1.92736e-06	1.90257e-06	2.4283e-06	2.09939e-06	1.8145e-06	1.96219e-06	2.05277e-06	2.09813e-06	2.11668e-06	1.92126e-06	3.35281e-06	1.75391e-06	2.55367e-06	2.32762e-06	2.44129e-06	2.80011e-06	3.05548e-06	2.70462e-06	2.48981e-06	2.97497e-06	2.63244e-06	2.53011e-06	3.60376e-06	3.93874e-06	3.86995e-06	3.28547e-06	3.02993e-06	2.58693e-06	2.96241e-06	1.77762e-06	2.47757e-06	2.58163e-06	2.32695e-06	2.0467e-06	2.22607e-06	2.08786e-06	2.13322e-06	1.95353e-06	1.47234e-06	1.59977e-06	2.02301e-06	1.84812e-06
Neuron_240	3.32576e-06	3.31234e-06	2.25998e-06	1.9206e-06	1.84139e-06	1.78124e-06	1.91785e-06	2.04681e-06	1.95173e-06	3.02947e-06	2.63078e-06	2.1111e-06	2.32749e-06	3.28709e-06	1.89892e-06	1.95414e-06	1.68582e-06	2.40397e-06	1.59905e-06	1.54477e-06	1.82514e-06	1.39762e-06	1.51247e-06	2.11484e-06	2.18198e-06	1.89474e-06	1.83916e-06	2.20304e-06	1.96294e-06	2.20976e-06	2.27645e-06	2.25827e-06	1.75223e-06	1.53154e-06	1.39798e-06	1.48514e-06	1.28718e-06	1.9821e-06	1.71162e-06	2.16132e-06	1.92706e-06	2.15085e-06	2.50119e-06	1.75731e-06	1.89291e-06	1.61892e-06	1.86859e-06	2.30946e-06	2.03843e-06
Neuron_241	2.98674e-06	2.58692e-06	1.88309e-06	1.71785e-06	2.91486e-06	2.89998e-06	3.1405e-06	2.99076e-06	3.03292e-06	3.63128e-06	3.87742e-06	3.82193e-06	3.64999e-06	2.52423e-06	2.63498e-06	2.74988e-06	2.21559e-06	3.20908e-06	1.44815e-06	1.86992e-06	2.18326e-06	2.7997e-06	3.26295e-06	2.38068e-06	2.63585e-06	2.31489e-06	2.18409e-06	1.86408e-06	2.26184e-06	2.80405e-06	2.6546e-06	2.075e-06	1.53715e-06	9.14644e-07	1.38783e-06	1.55728e-06	1.49813e-06	2.07637e-06	1.79912e-06	1.99202e-06	2.22529e-06	2.30253e-06	2.30388e-06	2.43267e-06	3.55087e-06	2.74397e-06	2.88908e-06	2.64256e-06	2.66942e-06
Neuron_242	2.65051e-06	1.48894e-06	1.69787e-06	1.04631e-06	1.06466e-06	1.27137e-06	2.44279e-06	3.23594e-06	2.85988e-06	1.62482e-06	1.72038e-06	1.41729e-06	1.57909e-06	1.14553e-06	1.37582e-06	2.28441e-06	2.71337e-06	2.63006e-06	2.78859e-06	1.85746e-06	1.74669e-06	1.92205e-06	1.37132e-06	1.39686e-06	1.9308e-06	2.29073e-06	2.27667e-06	2.56515e-06	3.32526e-06	3.81014e-06	3.05207e-06	2.71936e-06	2.51465e-06	1.80624e-06	2.33088e-06	1.95758e-06	1.79784e-06	1.08203e-06	1.00766e-06	9.28789e-07	1.17483e-06	1.1891e-06	1.08071e-06	1.06875e-06	1.5568e-06	1.44094e-06	1.23977e-06	1.35602e-06	1.65512e-06
Neuron_243	2.32249e-06	1.72989e-06	2.98071e-06	1.71636e-06	2.1183e-06	1.26487e-06	1.46365e-06	1.59992e-06	1.25317e-06	1.31155e-06	1.2979e-06	1.20353e-06	1.1841e-06	1.67856e-06	1.68822e-06	1.34234e-06	1.66963e-06	2.13426e-06	1.32387e-06	1.9283e-06	1.51338e-06	2.02641e-06	1.7432e-06	2.59046e-06	1.22475e-06	1.28001e-06	1.70382e-06	1.39484e-06	2.52571e-06	1.50771e-06	2.05817e-06	1.5676e-06	1.52006e-06	1.68197e-06	2.13629e-06	2.02091e-06	1.36688e-06	1.42396e-06	1.55452e-06	1.28222e-06	1.86534e-06	1.62904e-06	1.3544e-06	1.25856e-06	1.62987e-06	1.31272e-06	1.311e-06	1.41712e-06	1.46615e-06
Neuron_244	1.53732e-06	2.25937e-06	2.1484e-06	1.19228e-06	1.02601e-06	1.43105e-06	1.57181e-06	2.51808e-06	2.1153e-06	2.21952e-06	2.34393e-06	1.79594e-06	1.71021e-06	2.11605e-06	1.77515e-06	1.79599e-06	1.33435e-06	1.15132e-06	8.79993e-07	8.37227e-07	1.10804e-06	1.40337e-06	1.29871e-06	1.46413e-06	1.40156e-06	1.53755e-06	1.36648e-06	9.16367e-07	1.36799e-06	1.74436e-06	1.69121e-06	2.13452e-06	2.02343e-06	2.2201e-06	1.76899e-06	1.79257e-06	2.39714e-06	1.49511e-06	1.59774e-06	9.82621e-07	9.43933e-07	1.13295e-06	8.94192e-07	9.4913e-07	1.08217e-06	1.30043e-06	1.36538e-06	9.77159e-07	8.9155e-07
Neuron_245	3.62378e-06	3.71651e-06	3.13439e-06	2.83077e-06	2.8266e-06	2.3059e-06	1.76608e-06	1.29539e-06	1.60372e-06	1.58992e-06	1.6396e-06	1.04297e-06	1.23835e-06	1.086e-06	1.2872e-06	1.18517e-06	1.67305e-06	2.52008e-06	2.25087e-06	1.97469e-06	1.61637e-06	1.95522e-06	1.68346e-06	3.22532e-06	1.71901e-06	2.0373e-06	1.97938e-06	1.35209e-06	2.32163e-06	2.00406e-06	2.03236e-06	1.25684e-06	1.09355e-06	9.52534e-07	1.60277e-06	2.29958e-06	2.44898e-06	2.65311e-06	2.60702e-06	2.45255e-06	3.29927e-06	2.15751e-06	1.37328e-06	1.98473e-06	1.50424e-06	1.55564e-06	1.78914e-06	1.62569e-06	1.41668e-06
Neuron_246	3.45764e-06	2.53653e-06	3.62089e-06	2.76956e-06	3.27927e-06	3.10351e-06	2.45804e-06	1.92425e-06	1.26579e-06	1.71837e-06	1.4917e-06	1.20634e-06	1.16928e-06	1.29841e-06	1.31942e-06	1.45714e-06	1.33929e-06	1.56993e-06	1.30505e-06	1.22184e-06	1.54411e-06	1.46294e-06	1.66257e-06	1.61066e-06	1.6144e-06	1.22546e-06	1.52625e-06	1.64896e-06	1.5511e-06	1.23989e-06	1.09626e-06	1.25339e-06	1.07692e-06	1.06455e-06	1.22112e-06	1.54047e-06	1.04013e-06	1.13609e-06	1.30863e-06	1.32693e-06	1.17616e-06	1.53741e-06	1.87683e-06	1.58598e-06	1.46194e-06	1.1725e-06	1.036e-06	1.52558e-06	1.26693e-06
Neuron_247	2.94944e-06	2.3457e-06	2.35341e-06	2.28079e-06	2.46421e-06	2.98218e-06	2.77374e-06	2.53417e-06	2.09899e-06	2.79762e-06	2.62351e-06	2.15719e-06	1.62475e-06	2.63164e-06	2.9878e-06	3.28371e-06	2.67643e-06	3.69138e-06	1.71033e-06	2.16129e-06	1.74698e-06	2.30974e-06	2.34181e-06	2.16296e-06	2.12455e-06	2.02927e-06	1.80861e-06	1.56316e-06	2.42989e-06	2.47434e-06	1.58861e-06	1.81799e-06	1.86628e-06	2.06491e-06	2.69652e-06	2.4954e-06	2.07473e-06	2.11266e-06	1.90014e-06	2.66603e-06	2.51983e-06	2.87895e-06	1.9093e-06	1.93391e-06	1.63376e-06	1.78128e-06	1.71674e-06	2.09029e-06	1.65337e-06
Neuron_248	2.0098e-06	2.21939e-06	1.79167e-06	1.06602e-06	1.44117e-06	1.25538e-06	1.01314e-06	1.18922e-06	1.01608e-06	1.21494e-06	1.05508e-06	1.05669e-06	1.10891e-06	1.18821e-06	1.13056e-06	1.19578e-06	1.23631e-06	1.48869e-06	9.08591e-07	8.53576e-07	1.36273e-06	2.19839e-06	2.05232e-06	2.18453e-06	2.12627e-06	1.63007e-06	1.99038e-06	1.33449e-06	1.19352e-06	1.1521e-06	1.6498e-06	2.53165e-06	2.28487e-06	2.21675e-06	2.05747e-06	1.54472e-06	1.01279e-06	9.54627e-07	9.23199e-07	1.21216e-06	1.43293e-06	1.36177e-06	1.46253e-06	1.55009e-06	1.24943e-06	1.43068e-06	1.56376e-06	1.11323e-06	1.14326e-06
Neuron_249	2.16136e-06	2.10061e-06	2.11652e-06	1.60789e-06	1.44889e-06	1.61606e-06	1.35895e-06	1.62138e-06	1.20834e-06	1.50975e-06	1.59435e-06	2.19397e-06	1.78836e-06	2.147e-06	1.92288e-06	1.58497e-06	2.16828e-06	2.54855e-06	2.27919e-06	1.96046e-06	2.08453e-06	1.55833e-06	1.38637e-06	1.43197e-06	1.38384e-06	1.29997e-06	1.62527e-06	1.20274e-06	1.687e-06	1.58194e-06	1.24521e-06	1.88057e-06	2.55023e-06	2.98435e-06	2.11092e-06	2.37191e-06	2.6225e-06	2.94408e-06	3.19669e-06	3.46682e-06	3.345e-06	2.27754e-06	2.36783e-06	2.23955e-06	2.28197e-06	2.2506e-06	2.44845e-06	2.20652e-06	1.52937e-06
Neuron_250	3.01208e-06	2.29163e-06	1.85853e-06	1.90637e-06	1.97612e-06	2.04073e-06	1.97302e-06	3.16013e-06	3.39448e-06	3.2346e-06	2.54044e-06	2.00817e-06	2.47955e-06	3.60847e-06	2.37504e-06	2.64978e-06	3.00622e-06	3.59127e-06	2.55001e-06	1.91396e-06	2.39104e-06	2.21604e-06	2.17852e-06	2.4001e-06	2.18612e-06	2.30101e-06	3.18691e-06	3.00808e-06	2.51795e-06	2.28086e-06	2.04435e-06	1.83353e-06	1.64567e-06	2.41345e-06	2.32288e-06	2.89042e-06	2.95842e-06	3.27719e-06	2.93975e-06	3.39926e-06	3.90846e-06	3.99511e-06	4.30207e-06	4.06737e-06	3.9253e-06	3.99314e-06	3.91805e-06	4.49033e-06	4.79678e-06
Neuron_251	2.08389e-06	1.83763e-06	1.45005e-06	1.30941e-06	1.29068e-06	1.61192e-06	1.95567e-06	1.55421e-06	2.09166e-06	2.07822e-06	2.02106e-06	2.46577e-06	2.16432e-06	9.7841e-07	1.13273e-06	1.06026e-06	1.72098e-06	1.54297e-06	1.68823e-06	9.31088e-07	1.02427e-06	1.23846e-06	1.06608e-06	1.08693e-06	1.08664e-06	9.14244e-07	1.36085e-06	1.27435e-06	3.02088e-06	2.08395e-06	1.70873e-06	2.0329e-06	1.8751e-06	2.22604e-06	1.97058e-06	1.89839e-06	1.52377e-06	1.73612e-06	1.83809e-06	2.16964e-06	1.75673e-06	1.44193e-06	1.58617e-06	1.73624e-06	1.43135e-06	1.22229e-06	1.38358e-06	1.57763e-06	1.75384e-06
Neuron_252	2.79897e-06	2.44532e-06	2.25266e-06	1.53695e-06	1.75564e-06	1.80604e-06	1.84587e-06	1.92808e-06	2.0107e-06	2.13277e-06	2.05679e-06	2.35935e-06	2.19028e-06	2.05368e-06	2.00178e-06	1.86881e-06	2.46016e-06	2.5261e-06	1.82836e-06	1.53774e-06	1.4879e-06	1.71727e-06	1.69424e-06	2.04727e-06	1.53839e-06	1.49597e-06	1.80658e-06	1.60476e-06	2.02408e-06	2.01742e-06	1.57376e-06	1.97781e-06	2.04685e-06	2.02885e-06	2.04235e-06	1.80811e-06	1.67629e-06	1.54164e-06	1.64375e-06	1.57412e-06	1.99788e-06	2.27409e-06	1.88841e-06	1.71767e-06	1.82337e-06	1.68719e-06	1.57102e-06	1.66629e-06	1.7903e-06
Neuron_253	2.94348e-06	2.09595e-06	1.44654e-06	1.07374e-06	1.01974e-06	1.24744e-06	1.6513e-06	1.56001e-06	1.39348e-06	1.41224e-06	1.15853e-06	7.95724e-07	7.63281e-07	9.49072e-07	9.32643e-07	9.42492e-07	2.13545e-06	1.7664e-06	1.67798e-06	1.67798e-06	1.93138e-06	2.08989e-06	9.43244e-07	1.37473e-06	1.51972e-06	1.27015e-06	1.12392e-06	1.24674e-06	1.60403e-06	1.07389e-06	7.99917e-07	6.86085e-07	8.58641e-07	6.69946e-07	1.33e-06	1.94851e-06	8.11753e-07	1.12999e-06	1.01159e-06	1.27563e-06	1.6061e-06	1.49949e-06	7.83466e-07	9.40163e-07	1.16918e-06	6.68374e-07	8.66508e-07	1.1516e-06	1.08668e-06
Neuron_254	1.76003e-06	1.54483e-06	1.70419e-06	1.6479e-06	1.973e-06	1.35954e-06	1.53033e-06	1.11836e-06	1.0759e-06	1.12301e-06	9.78053e-07	8.58426e-07	8.58903e-07	1.15237e-06	1.06543e-06	9.33959e-07	1.25781e-06	1.36984e-06	6.92113e-07	8.98644e-07	8.34785e-07	9.85816e-07	1.28247e-06	2.62153e-06	1.90967e-06	3.10858e-06	2.3545e-06	3.54731e-06	2.73852e-06	1.63929e-06	2.10068e-06	2.19429e-06	1.79738e-06	1.32458e-06	1.64872e-06	1.60076e-06	1.44665e-06	1.72214e-06	1.7982e-06	1.57079e-06	2.33135e-06	2.31009e-06	2.23735e-06	1.38351e-06	1.61734e-06	1.43731e-06	1.50678e-06	2.33397e-06	2.51296e-06
Neuron_255	3.12248e-06	2.62866e-06	2.28773e-06	1.63767e-06	1.55591e-06	1.76404e-06	1.83999e-06	1.92486e-06	1.57864e-06	1.98711e-06	1.71909e-06	1.80383e-06	1.47095e-06	2.65358e-06	2.11623e-06	1.99181e-06	1.80196e-06	2.20128e-06	1.76589e-06	1.91401e-06	2.02345e-06	2.63633e-06	2.53416e-06	2.69713e-06	2.21844e-06	1.91516e-06	2.05168e-06	1.63379e-06	2.26136e-06	1.59648e-06	1.37132e-06	1.59058e-06	1.63537e-06	1.32097e-06	1.86126e-06	1.44583e-06	1.36779e-06	1.64214e-06	1.40786e-06	1.5882e-06	1.64393e-06	2.06038e-06	1.45945e-06	1.57896e-06	1.74984e-06	1.66559e-06	1.60599e-06	1.53649e-06	1.50925e-06
Neuron_256	3.04226e-05	2.44814e-05	1.92832e-05	1.80708e-05	1.81106e-05	1.68339e-05	1.64622e-05	1.96139e-05	1.74889e-05	2.00336e-05	1.49377e-05	1.57381e-05	1.6116e-05	1.77576e-05	1.68313e-05	1.73484e-05	2.01611e-05	2.14626e-05	1.66391e-05	1.72608e-05	2.03952e-05	2.04143e-05	2.26212e-05	2.24606e-05	1.97126e-05	1.70232e-05	2.21737e-05	1.65017e-05	2.17632e-05	1.85102e-05	1.68557e-05	2.35407e-05	1.97556e-05	1.49599e-05	1.70066e-05	1.77391e-05	1.55248e-05	1.6641e-05	1.56967e-05	1.68179e-05	2.2489e-05	1.82884e-05	1.60812e-05	1.93485e-05	2.13304e-05	1.65671e-05	1.58375e-05	1.73142e-05	1.78902e-05
Neuron_257	2.40939e-05	2.05552e-05	1.56439e-05	1.32213e-05	1.19256e-05	1.30811e-05	1.27134e-05	1.39807e-05	1.18997e-05	1.28993e-05	1.1607e-05	1.2379e-05	1.33241e-05	1.49123e-05	1.28632e-05	1.15708e-05	1.15029e-05	2.11913e-05	1.18001e-05	1.32117e-05	1.42494e-05	1.39973e-05	1.49991e-05	1.61172e-05	1.3464e-05	1.30614e-05	1.6002e-05	1.35884e-05	2.01498e-05	1.66905e-05	1.48785e-05	1.48487e-05	1.47565e-05	1.31499e-05	1.28131e-05	1.26247e-05	1.10154e-05	1.42601e-05	1.34711e-05	1.20725e-05	1.784e-05	1.48099e-05	1.36213e-05	1.23254e-05	1.31814e-05	1.19547e-05	1.07938e-05	1.25117e-05	1.24006e-05
Neuron_258	1.78615e-05	1.44171e-05	1.21231e-05	1.13875e-05	1.15687e-05	1.04409e-05	1.12695e-05	1.05569e-05	8.78418e-06	1.16863e-05	1.04367e-05	9.93988e-06	1.09159e-05	1.11195e-05	1.04688e-05	8.63704e-06	1.1183e-05	1.72559e-05	1.00832e-05	9.68997e-06	9.15569e-06	8.45346e-06	1.08921e-05	1.40468e-05	1.07941e-05	8.81099e-06	1.12987e-05	9.77753e-06	1.19461e-05	1.02329e-05	1.04449e-05	1.31475e-05	1.19202e-05	9.11208e-06	1.12378e-05	9.44613e-06	9.33566e-06	9.97867e-06	1.00366e-05	9.48955e-06	1.46218e-05	1.00188e-05	1.1065e-05	8.88071e-06	1.2546e-05	8.78593e-06	8.24148e-06	9.36113e-06	1.06655e-05
Neuron_259	2.97432e-05	2.21643e-05	1.91361e-05	1.66029e-05	1.80504e-05	1.74267e-05	1.73897e-05	1.86394e-05	1.42265e-05	1.71732e-05	1.59401e-05	1.65429e-05	1.57797e-05	1.73033e-05	1.76049e-05	1.73154e-05	1.94965e-05	2.07608e-05	1.54647e-05	1.41463e-05	1.49338e-05	1.64966e-05	1.79244e-05	2.02711e-05	1.91917e-05	1.55662e-05	1.91825e-05	1.60378e-05	1.91872e-05	1.66611e-05	1.52217e-05	1.82568e-05	1.65581e-05	1.49866e-05	1.82587e-05	1.68195e-05	1.40331e-05	1.493e-05	1.63279e-05	1.52463e-05	1.88473e-05	1.76164e-05	1.61309e-05	1.52347e-05	1.92372e-05	1.66723e-05	1.63056e-05	1.68485e-05	1.63803e-05
Neuron_260	1.62891e-05	1.20196e-05	9.66759e-06	1.01181e-05	1.0028e-05	8.82812e-06	8.23002e-06	8.77422e-06	7.25475e-06	7.58725e-06	7.87067e-06	7.12184e-06	9.50271e-06	9.45035e-06	9.23218e-06	8.25341e-06	8.88177e-06	1.33286e-05	8.6818e-06	8.72584e-06	6.99389e-06	7.35461e-06	7.65449e-06	8.61626e-06	7.62705e-06	7.7601e-06	8.61298e-06	7.51426e-06	9.94837e-06	1.05197e-05	9.56942e-06	9.07479e-06	9.2551e-06	8.11784e-06	7.37232e-06	7.70573e-06	6.4971e-06	9.04524e-06	8.88329e-06	7.41478e-06	1.2402e-05	9.04157e-06	8.55751e-06	7.41878e-06	8.4656e-06	6.86106e-06	6.91524e-06	8.20808e-06	8.29598e-06
Neuron_261	2.03127e-05	1.80495e-05	1.52261e-05	1.09738e-05	1.05544e-05	1.27219e-05	1.34967e-05	1.3335e-05	1.14815e-05	1.42916e-05	1.22227e-05	1.25626e-05	1.09949e-05	1.24402e-05	1.15917e-05	1.21971e-05	1.2413e-05	1.70306e-05	1.05369e-05	1.34668e-05	1.01213e-05	1.237e-05	1.37471e-05	1.41892e-05	1.14891e-05	1.20135e-05	1.1725e-05	1.12004e-05	1.64615e-05	1.3527e-05	9.74229e-06	1.10777e-05	1.09594e-05	8.99789e-06	1.06488e-05	1.0455e-05	9.32917e-06	1.10985e-05	1.00452e-05	1.17529e-05	1.12296e-05	1.55134e-05	1.20271e-05	1.20438e-05	1.23059e-05	1.00394e-05	9.23535e-06	1.14856e-05	1.10214e-05
Neuron_262	2.36007e-05	1.93076e-05	1.33417e-05	1.34742e-05	1.21512e-05	1.21529e-05	1.19485e-05	1.15833e-05	1.13896e-05	1.33458e-05	1.13289e-05	1.07439e-05	1.12271e-05	1.19475e-05	1.23905e-05	1.07646e-05	1.27732e-05	1.78232e-05	1.05037e-05	1.05039e-05	1.07112e-05	1.13034e-05	1.32474e-05	1.24468e-05	1.23315e-05	9.78723e-06	1.31236e-05	1.15699e-05	1.9021e-05	1.40783e-05	1.07751e-05	1.25537e-05	1.24435e-05	1.04012e-05	1.01878e-05	9.69324e-06	8.41111e-06	7.97623e-06	9.63378e-06	9.36079e-06	1.12808e-05	1.42402e-05	1.04968e-05	1.24309e-05	1.08217e-05	1.03703e-05	9.89056e-06	1.0884e-05	1.23638e-05
Neuron_263	2.42906e-05	1.96171e-05	1.60569e-05	1.66688e-05	1.52458e-05	1.58701e-05	1.39615e-05	1.55654e-05	1.48363e-05	1.64477e-05	1.44151e-05	1.38266e-05	1.3621e-05	1.56731e-05	1.40543e-05	1.40775e-05	1.5385e-05	1.70672e-05	1.41176e-05	1.50539e-05	1.36552e-05	1.59661e-05	1.81982e-05	1.70854e-05	1.45466e-05	1.4425e-05	1.56441e-05	1.26018e-05	1.96513e-05	1.58026e-05	1.40288e-05	1.78309e-05	1.58895e-05	1.33254e-05	1.13957e-05	1.26693e-05	1.1721e-05	1.43791e-05	1.1713e-05	1.35948e-05	1.64797e-05	1.73777e-05	1.24781e-05	1.41563e-05	1.5186e-05	1.34753e-05	1.28287e-05	1.37639e-05	1.41088e-05
Neuron_264	1.80137e-05	1.53115e-05	1.0763e-05	1.01831e-05	8.39529e-06	8.67281e-06	8.71587e-06	9.89077e-06	7.22688e-06	8.60059e-06	8.25492e-06	7.58919e-06	7.50607e-06	9.12479e-06	8.65611e-06	9.15672e-06	1.04038e-05	1.52294e-05	8.32072e-06	8.51986e-06	8.23678e-06	9.2984e-06	1.06859e-05	1.36408e-05	9.99118e-06	8.17959e-06	1.12635e-05	7.67326e-06	1.2185e-05	1.00456e-05	9.51475e-06	1.14002e-05	9.64125e-06	8.62843e-06	9.01173e-06	8.51137e-06	8.4981e-06	1.02731e-05	1.06034e-05	9.17104e-06	1.0535e-05	1.08202e-05	1.00424e-05	8.65015e-06	1.06257e-05	8.2674e-06	8.1259e-06	8.22118e-06	8.33973e-06
Neuron_265	3.46132e-05	3.11722e-05	2.73988e-05	2.09773e-05	1.93074e-05	1.93937e-05	2.11906e-05	2.16827e-05	1.94477e-05	2.2715e-05	2.20208e-05	2.04114e-05	2.09139e-05	2.21477e-05	2.35511e-05	2.15786e-05	2.53366e-05	2.50472e-05	1.98782e-05	1.93167e-05	2.06073e-05	2.02066e-05	2.47716e-05	2.32831e-05	2.30241e-05	1.85232e-05	2.3867e-05	1.87069e-05	2.22299e-05	2.19354e-05	1.83392e-05	1.99161e-05	1.93618e-05	1.85194e-05	2.16458e-05	1.93642e-05	1.7741e-05	1.69865e-05	1.98431e-05	1.81063e-05	2.2045e-05	2.38253e-05	2.00516e-05	2.12668e-05	2.12081e-05	1.81376e-05	1.77273e-05	2.0415e-05	1.97995e-05
Neuron_266	2.03172e-05	1.63133e-05	1.35031e-05	1.00111e-05	9.16377e-06	8.64287e-06	9.68256e-06	9.89492e-06	8.07643e-06	1.13307e-05	9.62335e-06	9.78373e-06	8.3299e-06	9.50527e-06	8.41868e-06	8.95891e-06	9.41297e-06	1.2986e-05	8.46447e-06	9.17547e-06	8.04161e-06	9.87464e-06	1.05181e-05	1.12215e-05	9.93621e-06	8.17175e-06	1.16289e-05	9.16651e-06	1.75163e-05	9.77422e-06	9.23607e-06	1.06683e-05	1.10568e-05	7.65522e-06	8.76063e-06	8.79381e-06	8.49777e-06	8.3476e-06	9.07452e-06	8.58736e-06	9.14911e-06	9.63292e-06	9.07246e-06	8.92746e-06	1.16992e-05	8.49418e-06	8.71746e-06	9.32713e-06	9.16355e-06
Neuron_267	1.74486e-05	1.50949e-05	1.29569e-05	9.08805e-06	8.82206e-06	9.50441e-06	1.06367e-05	1.02101e-05	7.73525e-06	1.22047e-05	1.02933e-05	9.33836e-06	7.55413e-06	1.05445e-05	9.0154e-06	8.68769e-06	1.02255e-05	1.35459e-05	9.16514e-06	8.89513e-06	8.08745e-06	8.12378e-06	9.04233e-06	1.29317e-05	1.06835e-05	9.80014e-06	1.06559e-05	8.9988e-06	1.18724e-05	1.01961e-05	8.68563e-06	1.03123e-05	9.46478e-06	9.90502e-06	9.29235e-06	8.21829e-06	8.28377e-06	8.64781e-06	7.50119e-06	7.34589e-06	1.13572e-05	1.15322e-05	8.59588e-06	8.2278e-06	8.97944e-06	7.33277e-06	6.40482e-06	7.50401e-06	8.5655e-06
Neuron_268	1.31017e-05	9.95814e-06	8.57121e-06	6.96832e-06	6.82427e-06	6.18202e-06	7.23556e-06	6.78116e-06	6.25326e-06	6.57287e-06	6.44971e-06	6.9675e-06	8.05999e-06	7.85291e-06	8.05766e-06	7.06085e-06	7.56032e-06	8.76275e-06	6.73578e-06	6.31967e-06	5.95112e-06	6.32858e-06	7.6769e-06	8.91737e-06	6.93036e-06	7.40478e-06	7.93129e-06	7.09463e-06	7.07988e-06	8.32412e-06	7.43187e-06	7.23003e-06	7.42495e-06	5.53992e-06	5.56336e-06	4.98188e-06	5.11928e-06	6.74291e-06	6.7056e-06	5.33275e-06	8.94684e-06	6.60314e-06	5.79043e-06	6.56708e-06	7.23452e-06	7.25083e-06	5.83504e-06	8.12446e-06	7.40506e-06
Neuron_269	2.85975e-05	2.31444e-05	1.69867e-05	1.3398e-05	1.32782e-05	1.2952e-05	1.35889e-05	1.48403e-05	1.2538e-05	1.44607e-05	1.23771e-05	1.46453e-05	1.45598e-05	1.43804e-05	1.46201e-05	1.45285e-05	1.3277e-05	1.95177e-05	1.1947e-05	1.27859e-05	1.2333e-05	1.38323e-05	1.30862e-05	1.43681e-05	1.36749e-05	1.13673e-05	1.32203e-05	1.31956e-05	1.62482e-05	1.47133e-05	1.3722e-05	1.32766e-05	1.22109e-05	1.10651e-05	1.22599e-05	1.1976e-05	1.05152e-05	1.29628e-05	1.19479e-05	1.25122e-05	1.31232e-05	1.50629e-05	1.5548e-05	1.20452e-05	1.559e-05	1.2048e-05	1.29528e-05	1.42276e-05	1.32693e-05
Neuron_270	1.72946e-05	1.45224e-05	1.0966e-05	9.04569e-06	7.50251e-06	8.04642e-06	8.5945e-06	8.31884e-06	7.24069e-06	1.03698e-05	7.87101e-06	8.18335e-06	7.18028e-06	8.1611e-06	8.37488e-06	6.99876e-06	7.66045e-06	1.25015e-05	6.74753e-06	6.29051e-06	7.50499e-06	6.25754e-06	7.60572e-06	7.38337e-06	9.02466e-06	6.53867e-06	7.708e-06	7.51433e-06	8.62399e-06	8.5671e-06	6.90404e-06	7.62546e-06	7.98516e-06	7.89978e-06	7.67377e-06	6.96881e-06	7.20015e-06	7.18918e-06	6.99515e-06	6.95848e-06	8.44196e-06	1.01963e-05	8.13179e-06	7.88239e-06	6.85333e-06	6.4211e-06	6.31696e-06	7.36042e-06	7.64477e-06
Neuron_271	1.22674e-05	1.01657e-05	8.4125e-06	7.77857e-06	7.40615e-06	6.40946e-06	7.22196e-06	7.25247e-06	7.01832e-06	6.8411e-06	5.91612e-06	6.39404e-06	7.54227e-06	7.3932e-06	7.36528e-06	6.64761e-06	8.31561e-06	9.49088e-06	6.35374e-06	6.4429e-06	5.96392e-06	7.31404e-06	7.40284e-06	8.04012e-06	6.64888e-06	7.39291e-06	8.11767e-06	7.58648e-06	1.28409e-05	8.12329e-06	7.37241e-06	7.63592e-06	7.10523e-06	5.39115e-06	5.65088e-06	6.11618e-06	5.64513e-06	7.4468e-06	6.87976e-06	6.44178e-06	8.03282e-06	6.59362e-06	5.73874e-06	6.59071e-06	5.8797e-06	5.07298e-06	5.63341e-06	6.10304e-06	6.63644e-06
Neuron_272	1.741e-05	1.46435e-05	8.53738e-06	8.79928e-06	7.49538e-06	9.10942e-06	7.66334e-06	9.42302e-06	9.40419e-06	9.98369e-06	8.95253e-06	9.20338e-06	7.19672e-06	8.8315e-06	8.32389e-06	9.12718e-06	9.17631e-06	1.3007e-05	6.42817e-06	7.08698e-06	8.8577e-06	9.2481e-06	1.03657e-05	9.97911e-06	1.04714e-05	8.79762e-06	1.08311e-05	9.81619e-06	1.16711e-05	1.30921e-05	8.93141e-06	9.48815e-06	7.97475e-06	8.44857e-06	7.00228e-06	7.55462e-06	6.4072e-06	7.44152e-06	7.59061e-06	7.98219e-06	9.66325e-06	1.24328e-05	9.788e-06	1.00077e-05	8.39135e-06	7.92897e-06	6.32947e-06	7.76921e-06	9.51985e-06
Neuron_273	1.62022e-05	1.50727e-05	1.25016e-05	9.87275e-06	9.57587e-06	9.76544e-06	9.43456e-06	9.59142e-06	1.15872e-05	1.0817e-05	9.49873e-06	9.46961e-06	9.29599e-06	1.11444e-05	1.03602e-05	1.02241e-05	1.2868e-05	1.85451e-05	9.69282e-06	9.18233e-06	8.76024e-06	1.07251e-05	1.05903e-05	1.18754e-05	9.4803e-06	1.00917e-05	1.01369e-05	9.21106e-06	1.82717e-05	1.14472e-05	1.07683e-05	1.01773e-05	1.02419e-05	1.03031e-05	9.81515e-06	9.18226e-06	8.34158e-06	1.08607e-05	1.07273e-05	9.23201e-06	1.11255e-05	1.21956e-05	1.02468e-05	1.01334e-05	1.10729e-05	1.13555e-05	1.11979e-05	1.04066e-05	9.17119e-06
Neuron_274	3.17072e-05	2.8025e-05	2.19436e-05	2.14628e-05	1.92142e-05	2.0614e-05	1.89006e-05	2.102e-05	1.9291e-05	2.26265e-05	1.97399e-05	1.90754e-05	1.57533e-05	1.75759e-05	1.59146e-05	1.71525e-05	1.93773e-05	2.66019e-05	1.64467e-05	1.7407e-05	1.74096e-05	1.91058e-05	2.00788e-05	2.06842e-05	1.77892e-05	1.81593e-05	2.02381e-05	1.86321e-05	3.29746e-05	2.21534e-05	1.81691e-05	1.8894e-05	1.78913e-05	1.62586e-05	1.71746e-05	1.78448e-05	1.46252e-05	1.79582e-05	1.67492e-05	1.8553e-05	2.04294e-05	2.65397e-05	1.97414e-05	1.71345e-05	2.11792e-05	1.8278e-05	1.74508e-05	1.95878e-05	1.87244e-05
Neuron_275	3.37337e-05	3.09545e-05	2.53032e-05	2.14761e-05	2.24694e-05	2.43572e-05	2.31882e-05	2.64069e-05	2.09036e-05	2.48947e-05	2.3968e-05	2.27322e-05	2.13799e-05	2.2972e-05	1.95633e-05	2.10924e-05	2.40502e-05	3.25054e-05	1.90642e-05	1.87671e-05	1.92515e-05	2.25522e-05	2.27207e-05	2.57938e-05	2.47631e-05	2.06735e-05	2.37822e-05	2.08702e-05	2.91773e-05	2.47135e-05	2.08232e-05	2.40527e-05	1.92556e-05	1.94815e-05	2.30504e-05	2.16798e-05	1.7506e-05	2.11711e-05	1.95766e-05	2.14877e-05	2.31752e-05	2.86912e-05	2.60315e-05	2.00175e-05	2.46374e-05	2.30855e-05	2.03621e-05	2.1003e-05	2.21183e-05
Neuron_276	1.28981e-05	1.1607e-05	8.3112e-06	7.92573e-06	6.27687e-06	6.98192e-06	6.08257e-06	8.35276e-06	8.30275e-06	9.47249e-06	7.32449e-06	7.30927e-06	7.09111e-06	7.58941e-06	7.01216e-06	7.5404e-06	7.57657e-06	9.95689e-06	6.71266e-06	6.36223e-06	8.13159e-06	8.63053e-06	9.53697e-06	9.38144e-06	8.6157e-06	8.26859e-06	1.00456e-05	8.62578e-06	1.00016e-05	8.27862e-06	8.36927e-06	9.19358e-06	8.46475e-06	6.71509e-06	6.39791e-06	7.27111e-06	6.18312e-06	7.58634e-06	6.62795e-06	7.25095e-06	7.77979e-06	7.59929e-06	6.99937e-06	8.10969e-06	8.28506e-06	6.29048e-06	6.40409e-06	7.81018e-06	8.75056e-06
Neuron_277	2.33376e-05	1.91743e-05	1.4903e-05	1.4054e-05	1.32105e-05	1.32203e-05	1.24009e-05	1.33491e-05	1.28486e-05	1.34691e-05	1.28075e-05	1.08799e-05	1.26919e-05	1.30916e-05	1.22839e-05	1.16253e-05	1.30188e-05	2.23023e-05	1.24437e-05	1.26632e-05	1.25607e-05	1.29686e-05	1.43501e-05	1.58596e-05	1.40932e-05	1.32759e-05	1.48554e-05	1.33213e-05	2.0456e-05	1.55407e-05	1.4746e-05	1.69765e-05	1.57166e-05	1.25208e-05	1.47097e-05	1.31877e-05	1.09209e-05	1.42158e-05	1.33276e-05	1.2004e-05	1.66169e-05	1.33026e-05	1.21694e-05	1.08866e-05	1.25545e-05	1.13997e-05	1.11859e-05	1.26283e-05	1.19305e-05
Neuron_278	1.55286e-05	1.29409e-05	1.07384e-05	9.60527e-06	8.3018e-06	8.1591e-06	7.44671e-06	8.67747e-06	8.99105e-06	7.83268e-06	8.34612e-06	6.95583e-06	8.34885e-06	8.12989e-06	8.31442e-06	7.48641e-06	9.89741e-06	1.85136e-05	9.43124e-06	8.63809e-06	8.17602e-06	9.12267e-06	1.18809e-05	1.44465e-05	7.93795e-06	8.18061e-06	9.27805e-06	7.47458e-06	1.18158e-05	9.13616e-06	8.93405e-06	1.04272e-05	8.82572e-06	6.61252e-06	9.7055e-06	7.97091e-06	7.33312e-06	9.858e-06	9.11382e-06	7.25564e-06	1.20323e-05	9.72652e-06	7.69813e-06	7.69237e-06	7.64421e-06	6.44991e-06	7.13971e-06	8.21218e-06	8.45125e-06
Neuron_279	2.24331e-05	2.01176e-05	1.49973e-05	1.36424e-05	1.28426e-05	1.29726e-05	1.16939e-05	1.28483e-05	1.14091e-05	1.28035e-05	1.19425e-05	1.21187e-05	1.1996e-05	1.20842e-05	1.4107e-05	1.33368e-05	1.38182e-05	1.44124e-05	1.22246e-05	1.11109e-05	1.17753e-05	1.38791e-05	1.4656e-05	1.41374e-05	1.35075e-05	1.19951e-05	1.53298e-05	1.23837e-05	1.49893e-05	1.2926e-05	1.1605e-05	1.27865e-05	1.33226e-05	1.08224e-05	1.18743e-05	1.16894e-05	9.61353e-06	1.04005e-05	1.20511e-05	1.13838e-05	1.29569e-05	1.34605e-05	1.17769e-05	1.39142e-05	1.31193e-05	1.17549e-05	1.14508e-05	1.23677e-05	1.09985e-05
Neuron_280	2.49833e-05	2.15148e-05	1.72345e-05	1.54585e-05	1.40166e-05	1.41653e-05	1.28655e-05	1.54743e-05	1.28724e-05	1.83055e-05	1.34596e-05	1.45186e-05	1.26994e-05	1.45039e-05	1.2848e-05	1.25281e-05	1.56692e-05	1.8041e-05	1.51449e-05	1.42567e-05	1.52772e-05	1.51698e-05	1.66594e-05	1.51206e-05	1.60647e-05	1.28539e-05	1.51304e-05	1.27366e-05	1.4541e-05	1.38762e-05	1.15602e-05	1.40431e-05	1.27062e-05	9.56884e-06	1.12311e-05	1.1536e-05	1.02396e-05	1.31577e-05	1.02714e-05	1.20668e-05	1.39039e-05	1.71608e-05	1.41071e-05	1.30968e-05	1.42616e-05	1.07965e-05	1.07085e-05	1.29837e-05	1.37243e-05
Neuron_281	1.68477e-05	1.34579e-05	1.1236e-05	8.96583e-06	9.47978e-06	9.49362e-06	1.00042e-05	1.0629e-05	9.4014e-06	1.15893e-05	9.89921e-06	9.31513e-06	1.09997e-05	1.17628e-05	1.1074e-05	1.232e-05	1.44068e-05	1.27851e-05	1.1043e-05	1.08199e-05	1.15032e-05	1.04687e-05	1.19561e-05	1.31423e-05	1.17061e-05	9.76089e-06	1.14788e-05	9.74777e-06	1.18584e-05	1.098e-05	9.92542e-06	1.22755e-05	1.14373e-05	8.50219e-06	9.72873e-06	8.85196e-06	9.11096e-06	9.37216e-06	8.6382e-06	9.37383e-06	1.04791e-05	9.71123e-06	9.30587e-06	9.91364e-06	1.06168e-05	8.32624e-06	8.81486e-06	8.92574e-06	9.63561e-06
Neuron_282	1.96424e-05	1.87748e-05	1.61439e-05	1.40336e-05	1.33038e-05	1.336e-05	1.19094e-05	1.32011e-05	9.78943e-06	1.43605e-05	1.11514e-05	1.14355e-05	1.07452e-05	1.33881e-05	1.16061e-05	1.12926e-05	1.28999e-05	1.70957e-05	1.31274e-05	1.26897e-05	1.31111e-05	1.4072e-05	1.38914e-05	1.70282e-05	1.40506e-05	1.18679e-05	1.44748e-05	1.08741e-05	2.41137e-05	1.29135e-05	1.02814e-05	1.13405e-05	1.25404e-05	1.12277e-05	9.70446e-06	1.13658e-05	1.09094e-05	1.16085e-05	1.0366e-05	1.09155e-05	1.53821e-05	1.61117e-05	1.17302e-05	1.16792e-05	1.47303e-05	1.03813e-05	1.00925e-05	1.22679e-05	1.30659e-05
Neuron_283	2.02573e-05	1.05982e-05	9.09806e-06	9.29488e-06	8.79084e-06	8.5723e-06	7.78872e-06	8.93758e-06	6.66562e-06	9.47328e-06	7.93864e-06	1.00431e-05	7.98863e-06	8.97521e-06	8.6264e-06	7.81634e-06	8.91334e-06	1.05906e-05	8.32671e-06	7.59763e-06	8.41308e-06	9.09168e-06	1.0094e-05	1.2122e-05	1.06799e-05	8.605e-06	9.08655e-06	7.81146e-06	1.02238e-05	7.77469e-06	8.09851e-06	8.48603e-06	8.34307e-06	8.43663e-06	9.28856e-06	8.00323e-06	8.39713e-06	9.71977e-06	7.86647e-06	8.91077e-06	1.1332e-05	9.4927e-06	8.23429e-06	8.35106e-06	1.17559e-05	8.3822e-06	1.01864e-05	9.72444e-06	1.01275e-05
Neuron_284	1.02775e-05	9.97341e-06	7.12457e-06	6.29766e-06	5.3764e-06	5.8547e-06	4.92125e-06	6.09418e-06	5.48473e-06	6.21402e-06	4.78751e-06	4.81824e-06	4.32049e-06	5.26729e-06	5.30368e-06	5.51623e-06	6.24544e-06	7.41447e-06	6.1233e-06	5.31197e-06	6.64691e-06	6.34357e-06	6.93587e-06	6.86106e-06	5.77627e-06	5.1744e-06	6.73825e-06	5.17508e-06	9.67875e-06	7.31435e-06	6.43097e-06	6.30632e-06	5.27943e-06	4.7145e-06	4.78791e-06	5.36657e-06	4.45251e-06	5.48156e-06	5.03112e-06	5.79813e-06	7.2844e-06	7.59807e-06	5.13575e-06	6.11001e-06	7.02795e-06	4.97177e-06	4.18967e-06	5.71936e-06	6.09931e-06
Neuron_285	1.62524e-05	1.32162e-05	1.04083e-05	1.16763e-05	1.11318e-05	1.14047e-05	9.29618e-06	1.06145e-05	8.34994e-06	9.54846e-06	9.75753e-06	9.91553e-06	9.78933e-06	9.53366e-06	1.15768e-05	1.07176e-05	1.22499e-05	1.34998e-05	1.25798e-05	1.06132e-05	1.1942e-05	1.1636e-05	1.2603e-05	1.13877e-05	1.28417e-05	1.1234e-05	1.11725e-05	8.40233e-06	1.10549e-05	1.04093e-05	1.01446e-05	1.05549e-05	8.30304e-06	8.74794e-06	9.69892e-06	9.22873e-06	7.85488e-06	1.00646e-05	9.33212e-06	1.06711e-05	1.2401e-05	1.25623e-05	1.1529e-05	9.97034e-06	1.09897e-05	1.05904e-05	1.07129e-05	1.14591e-05	1.09215e-05
Neuron_286	1.17464e-05	8.07061e-06	6.83797e-06	6.24402e-06	6.42538e-06	6.77475e-06	6.99542e-06	8.19652e-06	6.42346e-06	8.64519e-06	7.15915e-06	6.00877e-06	7.30783e-06	6.89114e-06	7.0519e-06	6.58197e-06	7.25947e-06	8.51634e-06	5.8685e-06	6.56965e-06	6.46704e-06	7.065e-06	8.84987e-06	9.44626e-06	8.28044e-06	9.01762e-06	9.38502e-06	7.70029e-06	1.31167e-05	7.93093e-06	6.92582e-06	9.87431e-06	8.44853e-06	6.01351e-06	6.71581e-06	6.96988e-06	5.93378e-06	6.63932e-06	6.23693e-06	6.58588e-06	8.52642e-06	8.68948e-06	6.60159e-06	7.41866e-06	8.5236e-06	6.41471e-06	6.24736e-06	6.49945e-06	6.85252e-06
Neuron_287	2.42926e-05	2.09003e-05	1.71245e-05	1.40359e-05	1.39189e-05	1.35443e-05	1.38021e-05	1.5278e-05	1.2288e-05	1.68501e-05	1.45119e-05	1.4329e-05	1.45525e-05	1.76575e-05	1.62749e-05	1.44417e-05	1.44653e-05	1.73601e-05	1.26179e-05	1.298e-05	1.34343e-05	1.39594e-05	1.60007e-05	1.89845e-05	1.51082e-05	1.36866e-05	1.51484e-05	1.29312e-05	2.24267e-05	1.70558e-05	1.35158e-05	1.4412e-05	1.55209e-05	1.20678e-05	1.24626e-05	1.23658e-05	1.12938e-05	1.32342e-05	1.28645e-05	1.19396e-05	1.63113e-05	1.59644e-05	1.34558e-05	1.41713e-05	1.65074e-05	1.13373e-05	1.19126e-05	1.45819e-05	1.46687e-05
Neuron_288	1.58821e-05	1.20816e-05	9.30303e-06	9.50961e-06	8.27181e-06	8.26445e-06	7.71585e-06	9.33141e-06	7.4269e-06	8.32389e-06	8.54078e-06	8.4642e-06	8.72573e-06	9.34544e-06	1.01666e-05	9.61271e-06	9.94796e-06	1.10789e-05	8.9503e-06	8.39199e-06	8.45276e-06	8.98259e-06	9.50039e-06	9.8297e-06	8.22848e-06	8.96268e-06	9.92073e-06	8.13903e-06	1.21647e-05	1.2066e-05	9.30465e-06	9.26824e-06	9.56975e-06	8.27972e-06	7.53366e-06	7.91784e-06	6.91408e-06	8.29962e-06	9.82373e-06	8.02203e-06	1.05017e-05	1.12837e-05	8.71324e-06	9.88026e-06	9.47028e-06	8.06928e-06	8.26548e-06	9.07774e-06	8.88081e-06
Neuron_289	3.44645e-05	2.83529e-05	2.40637e-05	2.17301e-05	1.83645e-05	1.87127e-05	1.97823e-05	2.00623e-05	1.95234e-05	2.3498e-05	2.09968e-05	1.97248e-05	2.075e-05	2.17951e-05	2.29815e-05	2.04345e-05	2.30109e-05	2.90343e-05	1.80924e-05	1.90198e-05	1.82141e-05	1.98958e-05	2.01286e-05	2.15081e-05	2.00694e-05	1.84251e-05	2.14006e-05	1.89816e-05	2.37785e-05	2.28732e-05	2.0872e-05	2.05121e-05	1.93876e-05	1.7783e-05	1.76227e-05	1.76041e-05	1.5242e-05	1.84129e-05	1.94041e-05	1.71103e-05	2.14222e-05	2.49136e-05	2.01091e-05	2.02336e-05	1.77739e-05	1.62976e-05	1.70571e-05	2.02124e-05	1.7723e-05
Neuron_290	1.55771e-05	1.33597e-05	1.06722e-05	8.39087e-06	7.9363e-06	7.64689e-06	8.05223e-06	9.33132e-06	9.9449e-06	1.06307e-05	8.7582e-06	9.2139e-06	8.79154e-06	9.61986e-06	9.47978e-06	9.2054e-06	1.2172e-05	1.94654e-05	8.89699e-06	8.5346e-06	9.2423e-06	1.22598e-05	1.24223e-05	1.40164e-05	1.14383e-05	9.82241e-06	1.07747e-05	9.52104e-06	1.79958e-05	1.16224e-05	1.00049e-05	1.16425e-05	1.1014e-05	7.73581e-06	1.05762e-05	1.00593e-05	1.00296e-05	1.17882e-05	1.09141e-05	9.53845e-06	1.07865e-05	9.76974e-06	8.55736e-06	9.76773e-06	1.21175e-05	8.75836e-06	1.02207e-05	1.03351e-05	1.02498e-05
Neuron_291	1.49832e-05	1.40707e-05	1.08852e-05	1.00104e-05	8.86403e-06	8.91311e-06	7.59414e-06	9.2666e-06	8.51812e-06	7.61031e-06	8.40152e-06	7.40698e-06	7.4639e-06	7.94032e-06	8.72005e-06	8.01884e-06	9.74853e-06	1.25035e-05	9.00155e-06	8.0054e-06	7.9238e-06	9.03979e-06	9.47402e-06	1.0259e-05	7.6336e-06	7.70319e-06	9.56661e-06	6.98695e-06	9.99764e-06	8.24086e-06	8.42727e-06	9.01074e-06	9.08938e-06	7.56769e-06	8.17244e-06	8.38986e-06	7.31161e-06	8.79321e-06	8.08042e-06	6.75237e-06	9.41652e-06	9.97804e-06	8.12371e-06	8.88608e-06	8.16895e-06	7.06637e-06	6.63772e-06	8.23909e-06	9.13024e-06
Neuron_292	2.47462e-05	1.99923e-05	1.41078e-05	1.29159e-05	1.24508e-05	1.1049e-05	1.01531e-05	1.27773e-05	1.001e-05	1.26116e-05	9.77047e-06	1.18007e-05	1.12033e-05	1.24739e-05	1.29829e-05	1.11747e-05	1.11105e-05	1.55009e-05	1.08019e-05	1.04944e-05	1.10408e-05	1.19258e-05	1.25178e-05	1.30945e-05	1.53312e-05	1.12309e-05	1.43811e-05	1.30601e-05	1.48053e-05	1.37402e-05	1.19937e-05	1.28613e-05	1.20658e-05	1.00825e-05	1.17707e-05	1.12405e-05	1.01054e-05	1.18987e-05	1.07715e-05	1.02871e-05	1.20455e-05	1.3446e-05	1.38339e-05	1.08001e-05	1.54348e-05	1.08879e-05	1.10926e-05	1.15851e-05	1.10452e-05
Neuron_293	8.66459e-06	6.45454e-06	5.44824e-06	5.05795e-06	5.22462e-06	6.29821e-06	5.51145e-06	5.39451e-06	3.9163e-06	4.70579e-06	4.47108e-06	4.48344e-06	5.52352e-06	5.6901e-06	5.04278e-06	4.98822e-06	5.54831e-06	6.64696e-06	4.38034e-06	5.12892e-06	4.34403e-06	4.77248e-06	4.68453e-06	5.60531e-06	4.83916e-06	5.72581e-06	5.6828e-06	5.1809e-06	9.06418e-06	6.52615e-06	6.08285e-06	7.19372e-06	6.98453e-06	5.64967e-06	5.94075e-06	5.91506e-06	4.50406e-06	5.64865e-06	5.78648e-06	5.74616e-06	7.03289e-06	5.72446e-06	4.76471e-06	4.73583e-06	5.12815e-06	4.45735e-06	4.71461e-06	5.14628e-06	5.30931e-06
Neuron_294	1.94448e-05	1.62768e-05	1.38178e-05	1.25737e-05	1.17541e-05	1.11301e-05	1.18908e-05	1.19837e-05	1.06184e-05	1.41473e-05	1.15694e-05	1.13035e-05	1.09847e-05	1.23776e-05	1.05152e-05	1.01651e-05	1.22646e-05	1.5452e-05	1.03516e-05	1.03502e-05	1.12196e-05	1.28752e-05	1.23018e-05	1.24262e-05	1.19863e-05	1.07235e-05	1.30901e-05	1.11457e-05	2.15281e-05	1.3229e-05	1.19745e-05	1.34306e-05	1.31851e-05	9.61496e-06	1.08582e-05	1.04223e-05	1.01624e-05	1.01408e-05	1.058e-05	1.0672e-05	1.20585e-05	1.30446e-05	1.11154e-05	1.16874e-05	1.21768e-05	1.11905e-05	1.08402e-05	1.1733e-05	1.15719e-05
Neuron_295	1.40166e-05	1.05535e-05	9.71014e-06	7.82728e-06	8.53255e-06	7.43227e-06	7.03931e-06	8.24785e-06	6.64039e-06	9.1816e-06	7.21953e-06	7.76776e-06	7.42123e-06	8.49299e-06	8.5105e-06	7.81888e-06	7.33811e-06	9.38296e-06	7.83949e-06	6.83029e-06	8.1306e-06	8.13169e-06	8.26325e-06	9.78043e-06	8.70787e-06	6.69914e-06	8.91627e-06	7.45692e-06	9.94237e-06	8.02204e-06	7.6502e-06	8.10181e-06	6.98862e-06	6.56015e-06	7.00766e-06	7.29822e-06	6.68579e-06	7.30852e-06	7.3105e-06	6.95712e-06	7.72199e-06	7.68109e-06	7.51944e-06	9.05831e-06	9.77914e-06	7.11721e-06	7.15462e-06	8.17637e-06	8.58502e-06
Neuron_296	1.16806e-05	8.18562e-06	7.36274e-06	5.70693e-06	5.64567e-06	4.84496e-06	5.51363e-06	6.27318e-06	4.40121e-06	5.56247e-06	5.5751e-06	5.03342e-06	4.76685e-06	4.85879e-06	4.69244e-06	4.61525e-06	5.31936e-06	5.85955e-06	5.03546e-06	4.9265e-06	4.29887e-06	5.27495e-06	4.94581e-06	5.40417e-06	4.94635e-06	5.32281e-06	6.26284e-06	4.79513e-06	5.93361e-06	5.39362e-06	5.10663e-06	5.03308e-06	4.41891e-06	4.81135e-06	5.57527e-06	5.33953e-06	5.71325e-06	5.94786e-06	5.9644e-06	5.18533e-06	5.64729e-06	7.19565e-06	5.97008e-06	5.15004e-06	5.76082e-06	5.64364e-06	4.87694e-06	4.95781e-06	5.4307e-06
Neuron_297	2.96642e-05	1.96406e-05	1.64941e-05	1.44318e-05	1.39104e-05	1.21701e-05	1.38331e-05	1.44387e-05	1.30475e-05	1.66258e-05	1.31212e-05	1.35263e-05	1.45373e-05	1.58118e-05	1.46377e-05	1.25895e-05	1.48903e-05	2.08506e-05	1.46678e-05	1.54372e-05	1.40488e-05	1.6691e-05	1.83526e-05	2.17501e-05	1.49318e-05	1.26756e-05	1.66141e-05	1.38025e-05	1.98357e-05	1.66044e-05	1.49973e-05	1.87609e-05	1.76762e-05	1.13609e-05	1.45809e-05	1.24302e-05	1.30049e-05	1.44152e-05	1.25411e-05	1.24087e-05	1.84223e-05	1.4955e-05	1.13316e-05	1.3897e-05	1.77629e-05	1.13388e-05	1.25032e-05	1.42592e-05	1.41694e-05
Neuron_298	2.63852e-05	2.34359e-05	1.97413e-05	1.37449e-05	1.22267e-05	1.22569e-05	1.33029e-05	1.34237e-05	9.69612e-06	1.73392e-05	1.31331e-05	1.37818e-05	1.09538e-05	1.49478e-05	1.29974e-05	1.19e-05	1.36437e-05	1.57618e-05	1.10294e-05	1.19143e-05	1.19145e-05	1.12745e-05	1.20752e-05	1.88175e-05	1.49425e-05	1.10711e-05	1.39974e-05	1.16911e-05	1.42112e-05	1.29306e-05	1.16324e-05	1.11902e-05	1.13071e-05	1.02787e-05	1.11207e-05	1.09323e-05	1.04017e-05	1.28341e-05	1.13183e-05	1.1182e-05	1.44228e-05	1.5857e-05	1.27057e-05	1.14062e-05	1.28695e-05	9.73734e-06	1.07884e-05	1.31337e-05	1.33824e-05
Neuron_299	9.71029e-06	8.15032e-06	6.28389e-06	5.85553e-06	5.31243e-06	5.60787e-06	5.1892e-06	6.84725e-06	5.84631e-06	5.79575e-06	5.5041e-06	5.29134e-06	5.1581e-06	5.61412e-06	5.12725e-06	5.32927e-06	6.18657e-06	8.01086e-06	5.35889e-06	5.5463e-06	4.8669e-06	5.67769e-06	6.43496e-06	7.09833e-06	6.66052e-06	4.64513e-06	6.59152e-06	5.15929e-06	6.9484e-06	5.77715e-06	5.03354e-06	6.8378e-06	6.27831e-06	5.32703e-06	4.90562e-06	5.24977e-06	5.2127e-06	5.8161e-06	5.94472e-06	5.80257e-06	6.22467e-06	6.62861e-06	6.03435e-06	5.8852e-06	6.83598e-06	5.9526e-06	5.17845e-06	5.05652e-06	5.5362e-06
Neuron_300	1.68617e-05	1.55945e-05	9.39443e-06	1.0807e-05	9.20597e-06	8.86081e-06	7.68338e-06	9.24849e-06	8.90444e-06	9.88239e-06	8.83581e-06	7.67262e-06	8.18151e-06	8.38023e-06	8.15502e-06	7.93628e-06	8.85068e-06	1.32868e-05	6.58867e-06	7.07312e-06	7.89808e-06	7.90223e-06	8.52493e-06	1.31115e-05	8.80802e-06	9.53681e-06	1.08329e-05	1.11384e-05	1.26016e-05	1.13237e-05	7.57755e-06	8.78148e-06	7.83365e-06	9.40633e-06	9.25526e-06	8.20732e-06	7.1626e-06	7.31468e-06	7.57185e-06	7.25997e-06	9.08506e-06	1.32705e-05	1.04897e-05	1.045e-05	8.10259e-06	8.74259e-06	8.37343e-06	8.46012e-06	1.05875e-05
Neuron_301	2.25353e-05	2.09432e-05	1.77902e-05	1.56666e-05	1.59239e-05	1.64754e-05	1.46968e-05	1.52217e-05	1.37097e-05	1.43338e-05	1.41092e-05	1.27997e-05	1.4387e-05	1.49651e-05	1.5152e-05	1.47748e-05	1.76938e-05	1.85004e-05	1.50109e-05	1.5139e-05	1.27714e-05	1.72542e-05	1.66026e-05	1.65329e-05	1.38349e-05	1.45584e-05	1.58733e-05	1.2985e-05	2.05247e-05	1.48203e-05	1.40903e-05	1.44244e-05	1.51602e-05	1.39341e-05	1.44018e-05	1.45768e-05	1.2461e-05	1.3739e-05	1.39934e-05	1.23074e-05	1.65018e-05	1.54432e-05	1.24236e-05	1.42825e-05	1.3608e-05	1.29835e-05	1.2929e-05	1.35429e-05	1.46743e-05
Neuron_302	1.43483e-05	1.21137e-05	9.38885e-06	8.36845e-06	7.46372e-06	7.72467e-06	8.04169e-06	8.63138e-06	6.97652e-06	7.94078e-06	6.63582e-06	7.86389e-06	7.1661e-06	7.77416e-06	7.79341e-06	7.51313e-06	8.56293e-06	1.14163e-05	6.74522e-06	7.81124e-06	6.58893e-06	8.81172e-06	9.78038e-06	8.83066e-06	8.36589e-06	8.13113e-06	1.08189e-05	9.1183e-06	1.34099e-05	9.60368e-06	7.20495e-06	9.04763e-06	9.47052e-06	7.19219e-06	7.5701e-06	6.98665e-06	6.33559e-06	6.46096e-06	6.8351e-06	6.70551e-06	8.14589e-06	9.19486e-06	6.83884e-06	7.04941e-06	8.60766e-06	5.99329e-06	6.66547e-06	8.02296e-06	7.72091e-06
Neuron_303	2.43343e-05	1.8982e-05	1.42994e-05	1.19969e-05	1.11187e-05	1.02169e-05	1.03505e-05	1.32048e-05	1.26332e-05	1.3153e-05	1.14125e-05	1.16054e-05	1.1596e-05	1.21698e-05	1.31701e-05	1.24418e-05	1.35878e-05	1.43827e-05	1.11906e-05	1.06844e-05	1.01812e-05	1.17968e-05	1.14381e-05	1.49128e-05	1.16274e-05	1.02262e-05	1.25436e-05	1.15522e-05	1.27959e-05	1.19915e-05	1.05088e-05	9.92099e-06	1.02137e-05	9.05639e-06	1.08685e-05	1.03714e-05	9.64894e-06	1.04736e-05	1.04368e-05	9.67976e-06	1.11918e-05	1.2292e-05	1.16462e-05	1.22785e-05	1.26192e-05	1.02852e-05	9.89429e-06	1.11261e-05	1.188e-05
Neuron_304	2.00568e-05	1.80351e-05	1.29497e-05	1.09703e-05	1.08128e-05	1.0675e-05	1.08745e-05	1.30289e-05	1.31111e-05	1.32814e-05	1.08573e-05	1.08807e-05	1.07503e-05	1.17835e-05	1.15555e-05	1.16688e-05	1.33714e-05	1.61033e-05	1.05266e-05	1.07852e-05	9.79494e-06	1.25272e-05	1.23378e-05	1.2826e-05	1.01782e-05	1.02961e-05	1.15533e-05	1.08311e-05	1.6682e-05	1.17519e-05	9.68285e-06	9.78037e-06	1.05863e-05	9.43487e-06	9.72292e-06	9.74308e-06	8.67753e-06	1.01763e-05	1.11547e-05	1.0466e-05	1.09932e-05	1.12552e-05	1.10414e-05	1.21988e-05	1.02797e-05	9.29789e-06	8.67561e-06	9.65512e-06	9.52517e-06
Neuron_305	1.38897e-05	1.22046e-05	9.65449e-06	8.02577e-06	7.60672e-06	7.20981e-06	7.98048e-06	9.08479e-06	7.38025e-06	1.05361e-05	8.43252e-06	8.44591e-06	7.27325e-06	7.9325e-06	6.74587e-06	7.39487e-06	8.122e-06	1.00604e-05	7.7285e-06	7.72087e-06	8.69365e-06	9.6031e-06	8.70533e-06	9.30424e-06	8.28072e-06	7.27689e-06	8.29452e-06	7.57656e-06	1.13765e-05	9.14146e-06	7.99891e-06	8.71226e-06	7.90048e-06	6.66764e-06	7.04959e-06	7.58994e-06	6.94153e-06	7.44315e-06	7.25023e-06	8.04337e-06	7.5406e-06	9.83718e-06	8.76051e-06	7.78571e-06	9.01055e-06	6.76826e-06	7.29492e-06	7.38913e-06	7.37166e-06
Neuron_306	1.94123e-05	1.74207e-05	1.33145e-05	1.20268e-05	1.08982e-05	1.04921e-05	1.06695e-05	1.2152e-05	1.09576e-05	1.16159e-05	1.09616e-05	9.68044e-06	1.13682e-05	1.17462e-05	1.21608e-05	1.20428e-05	1.29959e-05	1.35765e-05	1.01518e-05	1.0485e-05	1.08593e-05	1.23707e-05	1.43897e-05	1.48368e-05	1.14099e-05	1.19813e-05	1.32511e-05	1.07371e-05	1.41474e-05	1.23154e-05	1.17229e-05	1.37009e-05	1.24522e-05	1.04355e-05	1.08051e-05	1.20451e-05	9.86402e-06	1.06837e-05	1.11772e-05	1.09028e-05	1.25373e-05	1.12209e-05	1.00712e-05	1.20701e-05	1.19503e-05	9.65988e-06	9.83286e-06	1.0803e-05	1.05944e-05
Neuron_307	1.69553e-05	1.25768e-05	9.41745e-06	9.66406e-06	8.10206e-06	8.62272e-06	9.28192e-06	9.21281e-06	7.71485e-06	1.0182e-05	9.79164e-06	8.62534e-06	9.091e-06	1.00149e-05	1.06121e-05	8.51555e-06	8.28387e-06	1.36135e-05	8.60779e-06	8.26158e-06	7.16044e-06	7.59506e-06	9.20524e-06	8.85516e-06	8.44738e-06	7.4195e-06	8.28993e-06	8.25019e-06	1.12556e-05	9.86784e-06	8.44987e-06	9.99416e-06	9.58288e-06	9.03703e-06	8.69687e-06	8.32518e-06	8.13824e-06	8.74554e-06	8.42995e-06	8.01364e-06	1.14133e-05	1.06288e-05	8.4035e-06	7.67219e-06	8.26958e-06	7.70626e-06	6.9952e-06	7.24864e-06	7.68948e-06
Neuron_308	1.55986e-05	1.1453e-05	9.6609e-06	8.1053e-06	8.08315e-06	7.39989e-06	7.56966e-06	8.63953e-06	7.19523e-06	7.57783e-06	7.22967e-06	6.91643e-06	7.91626e-06	7.21644e-06	8.84195e-06	8.03238e-06	8.64366e-06	9.78736e-06	7.27867e-06	6.64245e-06	7.82396e-06	8.93514e-06	9.21376e-06	8.60688e-06	9.07762e-06	9.48098e-06	1.01312e-05	8.05838e-06	1.11721e-05	9.44033e-06	8.63384e-06	9.11046e-06	8.25426e-06	6.87135e-06	7.01416e-06	7.00182e-06	6.05814e-06	7.42734e-06	8.57188e-06	7.80378e-06	8.73175e-06	7.69719e-06	7.3403e-06	8.6673e-06	8.80617e-06	7.56525e-06	7.72389e-06	7.86027e-06	7.53476e-06
Neuron_309	2.1244e-05	1.72037e-05	1.42024e-05	1.2367e-05	1.24687e-05	1.15267e-05	1.16603e-05	1.31295e-05	1.24923e-05	1.42055e-05	1.3279e-05	1.21168e-05	1.17331e-05	1.29045e-05	1.18841e-05	1.2062e-05	1.52607e-05	1.58328e-05	1.07747e-05	1.15734e-05	9.89025e-06	1.57003e-05	1.38436e-05	1.47513e-05	1.0941e-05	1.08518e-05	1.26259e-05	1.09986e-05	2.18666e-05	1.20512e-05	1.10305e-05	1.32022e-05	1.37995e-05	1.12872e-05	1.20697e-05	1.07594e-05	9.16907e-06	9.79312e-06	1.05006e-05	1.06802e-05	1.14133e-05	1.31062e-05	1.13382e-05	1.28524e-05	1.28642e-05	1.18368e-05	1.22247e-05	1.18195e-05	1.19163e-05
Neuron_310	1.57302e-05	1.28486e-05	9.20603e-06	9.33925e-06	8.60997e-06	8.44988e-06	7.78712e-06	8.5849e-06	7.25969e-06	9.52173e-06	8.76157e-06	7.99362e-06	7.88221e-06	9.64766e-06	9.15563e-06	8.29808e-06	8.11978e-06	1.14762e-05	7.49144e-06	7.89439e-06	7.61196e-06	7.94733e-06	7.85522e-06	1.11385e-05	7.86457e-06	9.01221e-06	7.72894e-06	7.4784e-06	1.25222e-05	9.53166e-06	8.87985e-06	8.81218e-06	8.87579e-06	8.28725e-06	9.26971e-06	9.40807e-06	8.54461e-06	9.98002e-06	8.38561e-06	8.47808e-06	1.01388e-05	9.52065e-06	8.3541e-06	7.49946e-06	8.39393e-06	7.46667e-06	7.68928e-06	8.33213e-06	7.94172e-06
Neuron_311	1.78869e-05	1.53668e-05	9.07821e-06	1.08498e-05	8.88288e-06	1.16596e-05	6.77432e-06	1.1452e-05	8.75232e-06	8.8487e-06	7.867e-06	7.20955e-06	7.40093e-06	7.11253e-06	7.4711e-06	7.634e-06	9.60699e-06	1.49794e-05	8.9772e-06	8.26916e-06	8.76507e-06	8.77574e-06	1.22941e-05	9.21053e-06	9.81108e-06	8.43351e-06	9.59003e-06	8.32035e-06	1.32473e-05	8.70296e-06	7.69243e-06	1.13893e-05	8.50843e-06	7.09054e-06	7.2131e-06	9.18426e-06	6.874e-06	8.56523e-06	7.57733e-06	8.76257e-06	8.82222e-06	1.0905e-05	8.95351e-06	9.98129e-06	9.20527e-06	8.5065e-06	7.47221e-06	9.27323e-06	1.12126e-05
Neuron_312	1.97593e-05	1.73682e-05	1.4215e-05	1.34315e-05	1.35686e-05	1.28252e-05	1.25941e-05	1.29748e-05	1.06831e-05	1.44749e-05	1.22277e-05	1.17789e-05	1.30146e-05	1.29916e-05	1.27023e-05	1.23168e-05	1.441e-05	1.61225e-05	1.11538e-05	1.17836e-05	1.07829e-05	1.23668e-05	1.19056e-05	1.31819e-05	1.2167e-05	1.26001e-05	1.26742e-05	1.17319e-05	1.41655e-05	1.33283e-05	1.11646e-05	1.37288e-05	1.26107e-05	1.11386e-05	1.05992e-05	1.14642e-05	9.75534e-06	1.06534e-05	1.04873e-05	1.09499e-05	1.29745e-05	1.21729e-05	1.19864e-05	1.13307e-05	1.12167e-05	1.11671e-05	1.05351e-05	1.07198e-05	1.16587e-05
Neuron_313	2.13669e-05	1.89643e-05	1.36346e-05	1.29317e-05	1.21163e-05	1.16562e-05	1.05113e-05	1.23362e-05	1.05659e-05	1.24238e-05	1.08879e-05	1.07748e-05	1.11966e-05	1.2407e-05	1.07718e-05	1.24238e-05	1.26367e-05	1.88076e-05	1.07097e-05	1.11719e-05	1.18452e-05	1.12536e-05	1.16164e-05	1.18801e-05	1.33074e-05	1.11206e-05	1.35708e-05	1.19229e-05	1.70106e-05	1.28721e-05	1.1522e-05	1.19161e-05	1.01308e-05	9.71603e-06	1.07878e-05	1.1039e-05	8.77905e-06	1.111e-05	9.90105e-06	1.02963e-05	1.19699e-05	1.44612e-05	1.23234e-05	9.13574e-06	1.1939e-05	1.05729e-05	1.0246e-05	1.16956e-05	1.12602e-05
Neuron_314	2.06284e-05	1.70818e-05	1.30311e-05	1.15029e-05	1.07664e-05	1.04519e-05	1.13607e-05	1.16773e-05	1.09097e-05	1.45315e-05	1.17651e-05	1.05125e-05	9.69768e-06	1.00391e-05	1.12678e-05	1.05676e-05	1.25717e-05	1.72372e-05	1.05669e-05	1.03171e-05	1.02451e-05	1.06066e-05	1.26037e-05	1.23139e-05	1.22283e-05	9.84846e-06	1.17745e-05	1.0096e-05	1.5075e-05	1.15586e-05	9.86907e-06	1.24882e-05	1.19233e-05	1.04512e-05	1.17463e-05	1.06578e-05	9.8424e-06	9.38717e-06	1.04789e-05	1.14644e-05	1.27645e-05	1.43227e-05	1.21666e-05	1.15612e-05	1.20372e-05	1.05261e-05	1.02969e-05	1.08294e-05	1.17147e-05
Neuron_315	1.78247e-05	1.37341e-05	1.31124e-05	1.10948e-05	1.04076e-05	1.12996e-05	1.05458e-05	1.09194e-05	1.02807e-05	1.15911e-05	1.01503e-05	1.06538e-05	1.05994e-05	1.32194e-05	1.16267e-05	1.12871e-05	1.22154e-05	1.76845e-05	9.92474e-06	1.0586e-05	8.74195e-06	1.17099e-05	1.31083e-05	1.49162e-05	1.14625e-05	1.03413e-05	1.3005e-05	9.58882e-06	1.3197e-05	1.17826e-05	1.11105e-05	1.19936e-05	1.17665e-05	9.9228e-06	1.08288e-05	9.38213e-06	9.34945e-06	1.07509e-05	1.04167e-05	9.41658e-06	1.24845e-05	1.35632e-05	1.20299e-05	1.05263e-05	1.21677e-05	1.05954e-05	1.02203e-05	1.05272e-05	1.01594e-05
Neuron_316	2.17485e-05	1.91544e-05	1.68509e-05	1.3345e-05	1.31493e-05	1.31171e-05	1.51358e-05	1.48571e-05	1.27846e-05	1.71877e-05	1.45826e-05	1.28893e-05	1.10726e-05	1.28623e-05	1.31341e-05	1.29822e-05	1.46498e-05	1.801e-05	1.27689e-05	1.2559e-05	1.2621e-05	1.31045e-05	1.4509e-05	1.33571e-05	1.50476e-05	1.13005e-05	1.59444e-05	1.23175e-05	1.86606e-05	1.3839e-05	1.08315e-05	1.41056e-05	1.38689e-05	1.21856e-05	1.41815e-05	1.38409e-05	1.28518e-05	1.06944e-05	1.24207e-05	1.49296e-05	1.47733e-05	1.52964e-05	1.40003e-05	1.20219e-05	1.36911e-05	1.20415e-05	1.2722e-05	1.24879e-05	1.2917e-05
Neuron_317	1.6883e-05	1.35001e-05	1.09991e-05	9.07786e-06	9.82083e-06	1.07625e-05	1.13809e-05	1.12863e-05	9.29657e-06	1.15348e-05	1.01384e-05	9.50337e-06	9.33082e-06	1.0073e-05	8.97394e-06	9.8263e-06	1.09141e-05	1.26708e-05	8.06511e-06	8.55675e-06	8.68844e-06	1.11177e-05	9.13816e-06	1.08252e-05	9.61345e-06	8.39772e-06	9.23313e-06	9.12e-06	1.56004e-05	1.07729e-05	8.28433e-06	1.03967e-05	1.07208e-05	8.67567e-06	9.32819e-06	9.68097e-06	8.72709e-06	8.72192e-06	8.98182e-06	1.05274e-05	9.2853e-06	1.11662e-05	9.91452e-06	1.0328e-05	1.0267e-05	9.83231e-06	9.33639e-06	9.31164e-06	9.18019e-06
Neuron_318	3.14589e-05	2.73426e-05	2.18626e-05	1.94155e-05	1.74828e-05	1.69543e-05	1.56299e-05	1.78891e-05	1.50553e-05	1.92368e-05	1.61817e-05	1.57605e-05	1.56068e-05	1.70501e-05	1.72854e-05	1.51876e-05	1.51348e-05	2.28276e-05	1.62599e-05	1.58208e-05	1.74872e-05	1.81406e-05	2.06503e-05	1.99912e-05	1.8228e-05	1.579e-05	1.80009e-05	1.52312e-05	2.50102e-05	1.68472e-05	1.70501e-05	2.11348e-05	1.91129e-05	1.6197e-05	1.62289e-05	1.77645e-05	1.55323e-05	1.87507e-05	1.81913e-05	1.71371e-05	2.0916e-05	2.01009e-05	1.79832e-05	1.69233e-05	2.0933e-05	1.5578e-05	1.51273e-05	1.75082e-05	1.62333e-05
Neuron_319	2.08302e-05	1.72691e-05	1.40674e-05	1.25194e-05	1.26708e-05	1.28129e-05	1.39559e-05	1.41025e-05	1.24116e-05	1.49583e-05	1.30938e-05	1.29119e-05	1.2285e-05	1.30275e-05	1.2753e-05	1.29356e-05	1.355e-05	1.71158e-05	1.17259e-05	1.20812e-05	1.10254e-05	1.38791e-05	1.39529e-05	1.5989e-05	1.34054e-05	1.19781e-05	1.24717e-05	1.19269e-05	1.48388e-05	1.45494e-05	1.08566e-05	1.22952e-05	1.30026e-05	1.10673e-05	1.22618e-05	1.09521e-05	1.12901e-05	1.2393e-05	1.12818e-05	1.21581e-05	1.47778e-05	1.40903e-05	1.37757e-05	1.2045e-05	1.23511e-05	1.1112e-05	1.06408e-05	1.05967e-05	1.09613e-05
Neuron_320	2.41262e-05	1.84995e-05	1.4453e-05	1.2854e-05	1.27082e-05	1.28134e-05	1.30217e-05	1.41729e-05	1.1443e-05	1.42548e-05	1.32686e-05	1.28742e-05	1.21566e-05	1.40422e-05	1.34392e-05	1.23505e-05	1.20809e-05	1.38163e-05	1.17431e-05	1.27095e-05	1.17018e-05	1.30763e-05	1.51325e-05	1.50419e-05	1.39627e-05	1.21592e-05	1.38576e-05	1.24667e-05	1.68139e-05	1.39243e-05	1.16682e-05	1.43886e-05	1.3526e-05	1.00856e-05	1.03969e-05	1.086e-05	1.0618e-05	1.09652e-05	9.9358e-06	1.08453e-05	1.29609e-05	1.29018e-05	1.24122e-05	1.15004e-05	1.42646e-05	1.12851e-05	1.0549e-05	1.18053e-05	1.11315e-05
Neuron_321	2.77166e-05	2.55696e-05	2.08989e-05	1.70157e-05	1.42402e-05	1.49179e-05	1.55018e-05	1.58183e-05	1.2437e-05	1.87657e-05	1.5214e-05	1.57663e-05	1.44879e-05	1.59946e-05	1.61338e-05	1.42471e-05	1.46891e-05	2.67469e-05	1.493e-05	1.45607e-05	1.61133e-05	1.44207e-05	1.62403e-05	1.53752e-05	1.73903e-05	1.29929e-05	1.54838e-05	1.36656e-05	2.02551e-05	1.66097e-05	1.51339e-05	1.60857e-05	1.46837e-05	1.27817e-05	1.36767e-05	1.41201e-05	1.23249e-05	1.60984e-05	1.55722e-05	1.47546e-05	1.6869e-05	1.94441e-05	1.76675e-05	1.51391e-05	1.74418e-05	1.42249e-05	1.45749e-05	1.67822e-05	1.70723e-05
Neuron_322	2.0378e-05	1.76192e-05	1.40174e-05	1.19245e-05	1.02864e-05	9.87125e-06	1.05857e-05	1.10336e-05	9.42072e-06	1.0857e-05	1.02961e-05	9.18502e-06	1.00079e-05	1.06516e-05	1.12672e-05	1.03368e-05	1.13803e-05	1.24063e-05	9.38368e-06	1.02952e-05	9.82783e-06	1.0844e-05	1.26627e-05	1.23116e-05	1.03312e-05	1.00577e-05	1.20868e-05	9.48896e-06	1.28974e-05	1.07376e-05	9.9975e-06	1.18684e-05	1.14115e-05	1.01433e-05	1.00849e-05	1.128e-05	9.27624e-06	9.76598e-06	1.02206e-05	9.4794e-06	1.16839e-05	1.09543e-05	9.53518e-06	1.09074e-05	1.12769e-05	9.70203e-06	9.53495e-06	1.06549e-05	9.87615e-06
Neuron_323	2.08117e-05	1.77871e-05	1.44237e-05	1.26817e-05	1.11322e-05	1.13813e-05	1.06472e-05	1.23252e-05	9.78196e-06	1.31792e-05	1.09415e-05	1.0863e-05	1.01182e-05	1.11018e-05	1.0712e-05	1.00188e-05	1.05667e-05	1.47828e-05	1.17406e-05	1.14222e-05	1.17085e-05	1.16184e-05	1.43091e-05	1.42355e-05	1.24791e-05	1.00424e-05	1.29946e-05	1.06868e-05	1.52893e-05	1.0142e-05	9.83605e-06	1.28588e-05	1.13571e-05	8.61748e-06	1.00931e-05	1.01262e-05	9.39521e-06	1.05762e-05	9.83207e-06	1.01715e-05	1.21947e-05	1.28337e-05	1.07959e-05	1.10596e-05	1.26004e-05	9.1294e-06	8.58e-06	1.12215e-05	1.2361e-05
Neuron_324	3.10939e-05	2.42173e-05	1.80349e-05	1.62009e-05	1.3712e-05	1.52722e-05	1.4461e-05	1.63981e-05	1.29118e-05	1.72647e-05	1.44748e-05	1.21641e-05	1.25503e-05	1.34134e-05	1.4242e-05	1.29878e-05	1.49112e-05	2.33417e-05	1.42667e-05	1.52604e-05	1.41324e-05	1.38998e-05	2.02777e-05	1.6959e-05	1.54199e-05	1.37663e-05	1.50375e-05	1.36314e-05	2.26847e-05	1.75432e-05	1.25793e-05	1.83575e-05	1.65187e-05	1.17877e-05	1.28794e-05	1.28635e-05	1.26014e-05	1.2042e-05	1.1721e-05	1.22578e-05	1.5741e-05	1.74829e-05	1.23902e-05	1.31691e-05	1.47718e-05	1.17383e-05	1.10016e-05	1.24038e-05	1.55141e-05
Neuron_325	1.9905e-05	1.81246e-05	1.15298e-05	1.2441e-05	9.46523e-06	1.03303e-05	7.30208e-06	1.16256e-05	8.88479e-06	9.6975e-06	7.65403e-06	9.44313e-06	9.68003e-06	8.3788e-06	8.84488e-06	7.57639e-06	1.01944e-05	1.90931e-05	9.29473e-06	9.38345e-06	1.05414e-05	9.88984e-06	1.27568e-05	1.54931e-05	1.00222e-05	9.74748e-06	1.11011e-05	9.75959e-06	1.92289e-05	1.31434e-05	1.10874e-05	1.19155e-05	1.0355e-05	8.49038e-06	8.66984e-06	9.41848e-06	7.69565e-06	9.58857e-06	8.54291e-06	8.06912e-06	1.40433e-05	1.43884e-05	1.10048e-05	1.07154e-05	1.28063e-05	8.399e-06	7.53799e-06	1.06038e-05	1.23377e-05
Neuron_326	1.24517e-05	1.16521e-05	9.3898e-06	8.44789e-06	8.91112e-06	8.38546e-06	8.21877e-06	8.2688e-06	7.34381e-06	7.85522e-06	7.52135e-06	6.31006e-06	6.71411e-06	6.75797e-06	6.49539e-06	6.7154e-06	9.06838e-06	1.50649e-05	9.69223e-06	8.55005e-06	9.16912e-06	7.9681e-06	8.71733e-06	8.76409e-06	7.61518e-06	6.17847e-06	8.3876e-06	6.55307e-06	9.80794e-06	6.93731e-06	6.81092e-06	9.74602e-06	7.65893e-06	5.99536e-06	7.40638e-06	6.84347e-06	6.78355e-06	8.53892e-06	8.24045e-06	8.11872e-06	1.13966e-05	9.58123e-06	8.30089e-06	8.83399e-06	8.56978e-06	8.61403e-06	8.20834e-06	7.94269e-06	8.22537e-06
Neuron_327	1.24857e-05	9.63398e-06	8.33521e-06	7.13223e-06	6.81343e-06	7.91723e-06	7.34022e-06	7.61192e-06	6.57511e-06	7.79934e-06	7.89334e-06	7.38731e-06	5.6652e-06	7.75985e-06	7.0565e-06	6.75173e-06	7.25338e-06	9.97862e-06	6.50933e-06	6.89397e-06	5.73521e-06	7.53884e-06	7.58267e-06	6.89354e-06	5.96721e-06	6.05442e-06	6.52939e-06	5.4563e-06	8.31403e-06	8.00903e-06	6.36445e-06	6.20444e-06	6.58107e-06	6.67112e-06	5.98986e-06	5.03644e-06	5.50409e-06	5.63103e-06	4.37179e-06	5.56713e-06	6.58643e-06	7.75737e-06	6.91482e-06	5.28425e-06	5.63365e-06	5.71454e-06	5.24867e-06	5.52774e-06	5.64253e-06
Neuron_328	1.64759e-05	1.436e-05	1.19513e-05	9.8339e-06	9.60431e-06	9.30083e-06	8.72025e-06	1.01692e-05	8.34679e-06	1.10391e-05	9.19979e-06	8.78212e-06	7.96005e-06	9.65339e-06	9.44871e-06	9.09293e-06	1.00275e-05	1.30749e-05	1.02335e-05	9.12447e-06	1.07406e-05	1.06701e-05	1.19399e-05	1.20133e-05	1.12718e-05	8.63142e-06	1.04573e-05	8.74393e-06	1.16789e-05	8.93432e-06	9.41545e-06	1.09336e-05	9.5074e-06	8.24063e-06	8.76002e-06	8.71129e-06	7.61898e-06	9.50279e-06	9.14408e-06	8.85487e-06	1.00934e-05	1.0101e-05	9.59532e-06	9.78053e-06	1.15699e-05	8.59734e-06	8.18366e-06	9.57481e-06	8.67628e-06
Neuron_329	9.0547e-06	7.51564e-06	7.39385e-06	6.2018e-06	5.60674e-06	6.55647e-06	6.10124e-06	6.17193e-06	6.10335e-06	6.53705e-06	6.26646e-06	6.23801e-06	6.24925e-06	7.92186e-06	6.63947e-06	7.19634e-06	5.92008e-06	7.25245e-06	5.57138e-06	6.06306e-06	5.21484e-06	6.05321e-06	6.51922e-06	6.70762e-06	6.88418e-06	6.39486e-06	6.14152e-06	5.45959e-06	8.15795e-06	6.41459e-06	5.77889e-06	5.79903e-06	5.46649e-06	5.92239e-06	4.70546e-06	6.76447e-06	7.13494e-06	7.4701e-06	8.36277e-06	6.91843e-06	9.03019e-06	8.66617e-06	6.67539e-06	6.95632e-06	5.4781e-06	5.55747e-06	4.8017e-06	6.22933e-06	6.11569e-06
Neuron_330	1.3886e-05	1.32633e-05	1.10155e-05	8.6661e-06	7.35087e-06	8.08161e-06	7.37124e-06	8.25392e-06	8.68344e-06	9.86016e-06	7.73207e-06	7.59239e-06	7.78525e-06	8.35221e-06	6.75416e-06	7.40755e-06	1.02031e-05	1.76185e-05	7.96078e-06	7.62153e-06	7.84031e-06	8.99758e-06	9.65539e-06	1.34117e-05	8.50317e-06	7.84347e-06	8.89139e-06	7.8285e-06	1.42331e-05	1.03046e-05	8.77578e-06	8.43654e-06	7.63417e-06	6.451e-06	8.60365e-06	6.9188e-06	6.85073e-06	9.12064e-06	7.94792e-06	6.8758e-06	9.24612e-06	9.46361e-06	8.62499e-06	8.7057e-06	9.89588e-06	6.92624e-06	7.22705e-06	7.62308e-06	8.27283e-06
Neuron_331	2.4399e-05	1.95692e-05	1.42048e-05	1.15924e-05	1.10903e-05	1.19577e-05	1.142e-05	1.00872e-05	9.46108e-06	1.07841e-05	9.03299e-06	1.05756e-05	1.1717e-05	1.09822e-05	1.11285e-05	1.12624e-05	1.02455e-05	1.77308e-05	1.00911e-05	9.71633e-06	1.2405e-05	1.19744e-05	1.23649e-05	1.52812e-05	1.26353e-05	1.40471e-05	1.49963e-05	1.32532e-05	1.68137e-05	1.47683e-05	1.33887e-05	1.30721e-05	1.20389e-05	1.00556e-05	9.21348e-06	9.21829e-06	7.91333e-06	1.10735e-05	1.05071e-05	9.78477e-06	1.13676e-05	1.03307e-05	8.93685e-06	1.057e-05	1.04428e-05	8.48334e-06	9.62431e-06	1.1003e-05	1.0551e-05
Neuron_332	1.81297e-05	1.5422e-05	1.23585e-05	9.73453e-06	8.57157e-06	8.88384e-06	1.03813e-05	1.03732e-05	1.00629e-05	1.13278e-05	1.01107e-05	9.93881e-06	9.19701e-06	1.0065e-05	1.01341e-05	8.8526e-06	1.24714e-05	1.43024e-05	8.75923e-06	9.5565e-06	8.24036e-06	1.14539e-05	1.1914e-05	1.25968e-05	9.21971e-06	8.43795e-06	1.15788e-05	9.05928e-06	2.30032e-05	1.01832e-05	9.6556e-06	1.23531e-05	1.35583e-05	8.83958e-06	1.02531e-05	9.12124e-06	8.93098e-06	8.23522e-06	9.20767e-06	9.51861e-06	1.06202e-05	1.32587e-05	1.03292e-05	1.15416e-05	1.16645e-05	8.89497e-06	9.41044e-06	9.99966e-06	1.19815e-05
Neuron_333	2.69365e-05	2.33446e-05	1.68672e-05	1.37009e-05	1.38996e-05	1.43614e-05	1.38238e-05	1.45564e-05	1.40435e-05	1.61812e-05	1.37836e-05	1.38689e-05	1.14097e-05	1.34951e-05	1.20251e-05	1.26239e-05	1.73072e-05	1.6835e-05	1.14164e-05	1.2359e-05	1.18364e-05	1.73913e-05	1.54989e-05	1.49036e-05	1.26158e-05	1.16408e-05	1.35996e-05	1.20035e-05	2.34678e-05	1.6186e-05	1.19963e-05	1.31935e-05	1.48315e-05	1.15759e-05	1.18274e-05	1.2053e-05	1.01247e-05	1.00409e-05	9.87107e-06	1.13756e-05	1.1208e-05	1.50034e-05	1.18648e-05	1.29167e-05	1.31264e-05	1.22274e-05	1.17822e-05	1.18678e-05	1.21098e-05
Neuron_334	3.21651e-05	2.6998e-05	2.28164e-05	1.9014e-05	2.00016e-05	1.93278e-05	2.11203e-05	2.06783e-05	1.85834e-05	2.4395e-05	2.05514e-05	1.97647e-05	1.6908e-05	1.98686e-05	1.67172e-05	1.76083e-05	1.99678e-05	2.37036e-05	1.70792e-05	1.69087e-05	1.76425e-05	2.13042e-05	1.84316e-05	2.01916e-05	1.88865e-05	1.73961e-05	1.92433e-05	1.73008e-05	3.05104e-05	2.01826e-05	1.64447e-05	2.01347e-05	2.15924e-05	1.7696e-05	1.72699e-05	1.81187e-05	1.59827e-05	1.61026e-05	1.47435e-05	1.75565e-05	1.76364e-05	2.30325e-05	1.84383e-05	1.84516e-05	1.93307e-05	1.86073e-05	1.74979e-05	1.81077e-05	1.8485e-05
Neuron_335	3.37004e-05	3.11621e-05	2.38801e-05	2.38641e-05	2.24611e-05	2.09827e-05	1.90597e-05	2.21557e-05	1.77849e-05	2.11957e-05	1.95652e-05	2.03453e-05	2.15257e-05	2.18845e-05	2.13955e-05	2.07704e-05	2.17348e-05	2.3672e-05	1.91432e-05	1.90825e-05	1.85032e-05	2.18338e-05	2.16106e-05	2.2332e-05	2.21324e-05	1.99923e-05	2.39233e-05	2.00178e-05	2.55018e-05	2.45912e-05	1.91803e-05	2.31578e-05	2.10581e-05	1.87088e-05	1.85354e-05	1.9113e-05	1.61431e-05	1.7573e-05	1.74643e-05	1.79246e-05	2.12424e-05	2.26272e-05	2.00015e-05	1.9891e-05	2.16228e-05	1.923e-05	1.95308e-05	1.93204e-05	2.08887e-05
Neuron_336	1.62343e-05	1.20955e-05	9.0258e-06	8.21095e-06	7.92623e-06	7.09784e-06	7.81164e-06	8.30121e-06	7.62202e-06	8.8943e-06	7.03895e-06	6.45489e-06	6.96415e-06	7.70658e-06	8.44371e-06	8.71424e-06	8.44817e-06	1.45205e-05	6.8464e-06	7.05214e-06	7.37673e-06	8.3334e-06	8.61393e-06	8.63829e-06	8.11073e-06	7.63112e-06	8.73536e-06	8.20942e-06	1.76871e-05	1.02933e-05	8.36238e-06	9.13993e-06	1.12515e-05	8.02645e-06	8.01513e-06	8.00119e-06	7.04584e-06	7.17632e-06	8.1709e-06	7.68375e-06	9.47349e-06	9.49244e-06	8.01691e-06	9.06097e-06	9.74541e-06	9.61118e-06	9.18556e-06	9.04296e-06	9.63482e-06
Neuron_337	1.38467e-05	1.11474e-05	8.93292e-06	8.36586e-06	9.28873e-06	9.59308e-06	9.43001e-06	1.00369e-05	9.88079e-06	1.06436e-05	9.11634e-06	8.52818e-06	8.25178e-06	7.83362e-06	8.2508e-06	8.85062e-06	8.37009e-06	1.01592e-05	9.5465e-06	1.11976e-05	1.16407e-05	1.24968e-05	9.56825e-06	9.49586e-06	8.63473e-06	9.19045e-06	9.43572e-06	9.64322e-06	1.21368e-05	1.10903e-05	6.98701e-06	8.60229e-06	8.16342e-06	8.63007e-06	8.44747e-06	8.58486e-06	6.19403e-06	7.03728e-06	6.08979e-06	8.34988e-06	7.11137e-06	9.95675e-06	8.06283e-06	8.37889e-06	7.6578e-06	8.0772e-06	7.30395e-06	6.94966e-06	7.57952e-06
Neuron_338	1.94248e-05	1.66428e-05	1.35493e-05	1.131e-05	1.0903e-05	1.06407e-05	1.02991e-05	1.16083e-05	1.03799e-05	1.25012e-05	1.07011e-05	1.06605e-05	1.17593e-05	1.36786e-05	1.14576e-05	1.09447e-05	1.33928e-05	1.48047e-05	9.75452e-06	1.06258e-05	9.65011e-06	1.08561e-05	1.08356e-05	1.30969e-05	1.02061e-05	1.02544e-05	1.19683e-05	1.11296e-05	1.46629e-05	1.23893e-05	1.14309e-05	1.20371e-05	1.15418e-05	1.02255e-05	1.11075e-05	1.09316e-05	9.42701e-06	1.22721e-05	1.25692e-05	1.25277e-05	1.35133e-05	1.3289e-05	1.15096e-05	1.16747e-05	1.18281e-05	1.02764e-05	1.08456e-05	1.08238e-05	1.13536e-05
Neuron_339	3.11132e-05	2.39372e-05	2.09205e-05	1.91092e-05	1.91138e-05	1.95311e-05	1.90039e-05	1.87835e-05	1.7164e-05	1.82973e-05	1.71517e-05	1.58684e-05	1.65917e-05	1.96965e-05	1.92312e-05	1.85006e-05	2.12744e-05	2.13922e-05	1.76647e-05	1.69282e-05	1.79576e-05	2.1861e-05	2.05896e-05	2.06808e-05	1.91648e-05	1.92734e-05	2.15094e-05	1.66107e-05	2.441e-05	2.07144e-05	1.77877e-05	2.0411e-05	1.98738e-05	1.73777e-05	1.70824e-05	1.80064e-05	1.49349e-05	1.65964e-05	1.8203e-05	1.70296e-05	1.91797e-05	2.01129e-05	1.66697e-05	1.98816e-05	1.95225e-05	1.93683e-05	1.73359e-05	1.74279e-05	1.62432e-05
Neuron_340	1.8746e-05	1.28666e-05	9.94876e-06	8.82564e-06	8.20361e-06	7.88815e-06	6.74105e-06	8.41466e-06	6.98458e-06	8.59102e-06	7.48313e-06	7.58722e-06	8.30817e-06	9.19644e-06	8.95043e-06	8.87813e-06	9.41198e-06	1.29599e-05	8.92765e-06	8.8369e-06	7.44608e-06	1.04451e-05	1.1107e-05	1.3802e-05	9.42996e-06	8.2107e-06	1.04671e-05	7.64586e-06	1.26611e-05	9.77877e-06	9.30624e-06	1.07028e-05	1.04645e-05	8.51062e-06	8.60059e-06	7.47901e-06	6.96456e-06	7.36994e-06	8.58045e-06	7.66659e-06	9.30259e-06	8.85227e-06	7.90799e-06	8.9895e-06	1.08975e-05	7.4229e-06	7.65129e-06	9.01112e-06	9.53559e-06
Neuron_341	1.25343e-05	1.06076e-05	8.64342e-06	7.58362e-06	7.22812e-06	7.79346e-06	7.90576e-06	8.22094e-06	7.88269e-06	8.37414e-06	7.73478e-06	9.16182e-06	7.22787e-06	7.81462e-06	9.4386e-06	9.9618e-06	1.05712e-05	1.52014e-05	7.88841e-06	8.43874e-06	7.74744e-06	7.85437e-06	9.16702e-06	1.00548e-05	7.87664e-06	8.81083e-06	9.52354e-06	7.56115e-06	1.75729e-05	1.05653e-05	7.496e-06	8.28734e-06	8.21778e-06	6.10879e-06	8.81779e-06	7.7357e-06	6.71967e-06	6.97558e-06	6.7556e-06	7.38781e-06	9.77626e-06	1.21726e-05	7.89568e-06	6.9893e-06	9.34228e-06	6.90886e-06	6.34107e-06	6.96048e-06	7.79977e-06
Neuron_342	1.75428e-05	1.63532e-05	1.25407e-05	1.20768e-05	1.11713e-05	1.12999e-05	1.08086e-05	1.16064e-05	9.59611e-06	1.15841e-05	1.02331e-05	1.00392e-05	9.2001e-06	1.01228e-05	1.04021e-05	9.68634e-06	9.45535e-06	1.43613e-05	1.08942e-05	1.05895e-05	1.09272e-05	1.09217e-05	1.06405e-05	1.0564e-05	1.19683e-05	1.01069e-05	1.11652e-05	8.77871e-06	1.43402e-05	1.15193e-05	9.39617e-06	9.91145e-06	9.72974e-06	9.09815e-06	9.55926e-06	8.98558e-06	7.73576e-06	9.2985e-06	9.17491e-06	9.34672e-06	1.18997e-05	1.37217e-05	9.73129e-06	1.07646e-05	1.17822e-05	1.05316e-05	9.61134e-06	1.00508e-05	9.99111e-06
Neuron_343	4.20313e-05	3.63365e-05	3.08957e-05	2.48205e-05	2.32412e-05	2.31338e-05	2.65523e-05	2.42618e-05	2.20222e-05	2.85255e-05	2.6103e-05	2.2915e-05	2.31583e-05	2.51408e-05	2.56168e-05	2.35961e-05	2.59192e-05	3.07403e-05	2.23673e-05	2.25842e-05	2.44166e-05	2.32786e-05	2.77719e-05	2.62263e-05	2.64033e-05	2.11659e-05	2.72272e-05	2.18827e-05	2.85855e-05	2.63386e-05	2.10277e-05	2.40299e-05	2.31288e-05	2.1776e-05	2.47534e-05	2.29849e-05	2.08908e-05	2.00042e-05	2.21581e-05	2.16182e-05	2.63432e-05	2.95133e-05	2.4604e-05	2.42191e-05	2.42374e-05	2.22917e-05	2.05766e-05	2.20058e-05	2.19043e-05
Neuron_344	1.38603e-05	1.10208e-05	9.46325e-06	9.54036e-06	1.03904e-05	1.02712e-05	9.69678e-06	9.28894e-06	8.98435e-06	9.92349e-06	1.07302e-05	9.96003e-06	1.11814e-05	1.08477e-05	1.05172e-05	1.01773e-05	1.1756e-05	1.07798e-05	8.77419e-06	9.3016e-06	8.45003e-06	1.00815e-05	9.94751e-06	9.91551e-06	8.71399e-06	8.58753e-06	9.5464e-06	8.1574e-06	1.14262e-05	9.61421e-06	8.29243e-06	9.59729e-06	9.85213e-06	9.896e-06	1.01109e-05	9.93631e-06	7.66914e-06	8.45091e-06	9.02953e-06	8.43963e-06	1.09312e-05	1.02954e-05	8.6624e-06	9.56852e-06	8.68034e-06	8.38201e-06	8.01016e-06	8.33536e-06	8.54673e-06
Neuron_345	2.24959e-05	1.96198e-05	1.34549e-05	1.17412e-05	1.06544e-05	1.06874e-05	1.00986e-05	1.15213e-05	1.19786e-05	1.24019e-05	1.01816e-05	1.06531e-05	1.03667e-05	1.19632e-05	1.09189e-05	1.16147e-05	1.276e-05	2.14514e-05	1.02535e-05	1.07626e-05	1.16083e-05	1.31694e-05	1.33484e-05	1.29596e-05	1.24821e-05	1.10528e-05	1.30123e-05	1.12698e-05	2.20463e-05	1.47582e-05	1.17368e-05	1.33862e-05	1.31045e-05	1.05505e-05	1.02323e-05	1.12161e-05	1.05352e-05	1.17763e-05	1.2134e-05	1.01898e-05	1.18531e-05	1.30095e-05	1.04923e-05	1.25746e-05	1.17895e-05	1.09861e-05	1.07909e-05	1.10998e-05	1.11235e-05
Neuron_346	1.66974e-05	1.53535e-05	1.17411e-05	1.08736e-05	9.45617e-06	9.04461e-06	9.09401e-06	9.60011e-06	8.03781e-06	8.94307e-06	8.23184e-06	8.31827e-06	8.40041e-06	8.15369e-06	8.9654e-06	7.84174e-06	9.21642e-06	1.16123e-05	7.34178e-06	7.9836e-06	7.71801e-06	8.28122e-06	7.26221e-06	8.4705e-06	7.94083e-06	7.08783e-06	8.61806e-06	7.15245e-06	8.11625e-06	9.00805e-06	8.30418e-06	8.04713e-06	6.66469e-06	7.97075e-06	8.36153e-06	9.66272e-06	7.7912e-06	8.15243e-06	7.77631e-06	7.59747e-06	9.36513e-06	1.1169e-05	9.47227e-06	1.02185e-05	7.98531e-06	8.10048e-06	8.09776e-06	9.31892e-06	9.69241e-06
Neuron_347	1.90095e-05	1.55792e-05	1.37629e-05	1.19265e-05	1.01111e-05	1.04351e-05	1.04953e-05	1.07721e-05	1.02182e-05	1.23349e-05	1.11338e-05	1.10069e-05	1.13095e-05	1.24916e-05	1.24593e-05	1.07886e-05	1.43503e-05	1.45939e-05	1.13543e-05	1.09345e-05	9.94793e-06	1.16264e-05	1.24598e-05	1.32681e-05	1.16727e-05	1.06606e-05	1.30569e-05	1.08726e-05	1.34704e-05	1.2991e-05	1.10611e-05	1.24753e-05	1.15649e-05	9.07858e-06	1.0302e-05	9.12066e-06	8.86139e-06	1.04734e-05	1.03196e-05	9.14422e-06	1.2473e-05	1.25931e-05	1.01303e-05	1.15238e-05	1.12924e-05	9.67899e-06	1.01532e-05	1.13365e-05	1.07623e-05
Neuron_348	3.10915e-05	2.5267e-05	2.04841e-05	1.80097e-05	1.91287e-05	1.89627e-05	1.8822e-05	1.9851e-05	1.64135e-05	2.04553e-05	1.80312e-05	1.81502e-05	1.8722e-05	1.80178e-05	1.58713e-05	1.67533e-05	1.93812e-05	2.67707e-05	1.54965e-05	1.44577e-05	1.72875e-05	1.81386e-05	1.70302e-05	1.94622e-05	2.01413e-05	1.76157e-05	1.91174e-05	1.71864e-05	2.43927e-05	2.25319e-05	1.80048e-05	1.9962e-05	1.71041e-05	1.58793e-05	1.79203e-05	1.74516e-05	1.41386e-05	1.91622e-05	1.71606e-05	1.75583e-05	1.95665e-05	2.1143e-05	1.9357e-05	1.67615e-05	1.92281e-05	1.72269e-05	1.66026e-05	1.73264e-05	1.6975e-05
Neuron_349	2.1277e-05	1.87036e-05	1.40494e-05	1.29398e-05	1.15006e-05	1.20523e-05	1.14169e-05	1.24827e-05	1.07579e-05	1.16174e-05	1.11684e-05	1.05353e-05	1.10417e-05	1.11527e-05	1.19914e-05	1.22271e-05	1.13467e-05	1.37576e-05	1.01118e-05	1.06678e-05	1.06861e-05	1.03928e-05	1.11391e-05	1.16902e-05	1.19747e-05	1.21778e-05	1.26514e-05	1.12365e-05	1.35859e-05	1.21704e-05	1.07347e-05	1.20348e-05	1.15841e-05	9.94095e-06	1.17489e-05	1.09611e-05	8.31054e-06	1.21259e-05	1.10091e-05	1.26508e-05	1.37945e-05	1.32886e-05	1.13582e-05	9.63008e-06	1.06952e-05	9.28104e-06	9.49115e-06	9.87178e-06	9.59075e-06
Neuron_350	2.47689e-05	1.9641e-05	1.44489e-05	1.25452e-05	1.14193e-05	1.12236e-05	1.20113e-05	1.29325e-05	1.30068e-05	1.32928e-05	1.22238e-05	1.13511e-05	1.07354e-05	1.11984e-05	1.0517e-05	1.13308e-05	1.38729e-05	1.93757e-05	1.22106e-05	1.20424e-05	1.22629e-05	1.46675e-05	1.49222e-05	1.4895e-05	1.21185e-05	1.15981e-05	1.26921e-05	1.1705e-05	1.99382e-05	1.49879e-05	1.29161e-05	1.5797e-05	1.40107e-05	1.02071e-05	1.11165e-05	1.10487e-05	1.01528e-05	1.24346e-05	1.15071e-05	1.22702e-05	1.4904e-05	1.22135e-05	1.2154e-05	1.11014e-05	1.28127e-05	9.84203e-06	1.10512e-05	1.20177e-05	1.09777e-05
Neuron_351	3.5123e-05	3.14033e-05	2.24154e-05	2.04609e-05	1.76419e-05	1.80282e-05	1.71936e-05	2.06132e-05	1.65639e-05	2.23324e-05	1.82851e-05	1.80605e-05	1.61616e-05	1.82462e-05	1.55915e-05	1.70353e-05	1.67323e-05	2.20937e-05	1.43968e-05	1.549e-05	1.86246e-05	1.65629e-05	1.91299e-05	1.91834e-05	1.91368e-05	1.60702e-05	1.87818e-05	1.78946e-05	2.2056e-05	1.97177e-05	1.75316e-05	1.7444e-05	1.58041e-05	1.30341e-05	1.3437e-05	1.53373e-05	1.20993e-05	1.65568e-05	1.41782e-05	1.49917e-05	1.68193e-05	2.21864e-05	1.83658e-05	1.73277e-05	1.8079e-05	1.50139e-05	1.53193e-05	1.87066e-05	1.84905e-05
Neuron_352	1.93304e-05	1.63659e-05	1.32373e-05	1.2434e-05	1.18183e-05	1.13012e-05	1.08003e-05	1.01743e-05	9.70594e-06	1.14424e-05	1.03638e-05	1.06241e-05	1.05963e-05	1.36603e-05	1.22139e-05	1.14384e-05	1.28321e-05	1.55018e-05	1.11032e-05	1.16072e-05	9.64743e-06	1.14053e-05	1.2276e-05	1.48609e-05	1.07692e-05	1.00388e-05	1.23722e-05	1.0073e-05	1.69046e-05	1.15416e-05	1.0903e-05	1.14459e-05	1.25419e-05	1.01373e-05	1.02076e-05	1.01426e-05	9.68595e-06	1.1179e-05	1.17965e-05	1.05034e-05	1.26067e-05	1.19802e-05	1.04865e-05	1.09823e-05	1.12343e-05	1.06311e-05	1.07552e-05	1.08276e-05	9.98415e-06
Neuron_353	2.05802e-05	1.87401e-05	1.39651e-05	1.20971e-05	1.21331e-05	1.16251e-05	1.18944e-05	1.22472e-05	1.16698e-05	1.33121e-05	1.14124e-05	1.06262e-05	1.15827e-05	1.12912e-05	1.15027e-05	1.16435e-05	1.14051e-05	1.77163e-05	1.10455e-05	1.13237e-05	1.18772e-05	1.15073e-05	1.22622e-05	1.23715e-05	1.16735e-05	1.08062e-05	1.33437e-05	1.13055e-05	1.39355e-05	1.13668e-05	1.07624e-05	1.24498e-05	1.17768e-05	1.11616e-05	1.1842e-05	1.0898e-05	9.15399e-06	1.10079e-05	1.08564e-05	1.02126e-05	1.29826e-05	1.1328e-05	1.03936e-05	9.55576e-06	9.69972e-06	9.81838e-06	9.93653e-06	9.92638e-06	1.08929e-05
Neuron_354	2.02278e-05	1.79525e-05	1.32642e-05	1.19115e-05	1.1476e-05	1.01564e-05	1.09488e-05	1.24157e-05	9.45611e-06	1.11305e-05	1.09688e-05	9.91762e-06	1.09674e-05	1.20438e-05	1.22329e-05	1.15608e-05	1.23667e-05	1.27377e-05	9.73746e-06	1.05752e-05	1.01356e-05	1.10847e-05	1.30125e-05	1.2296e-05	1.23436e-05	1.20874e-05	1.23654e-05	1.08625e-05	1.41066e-05	1.37442e-05	1.03658e-05	1.11473e-05	1.16112e-05	1.07119e-05	1.10673e-05	1.16177e-05	9.27317e-06	1.11811e-05	1.14123e-05	1.12978e-05	1.28463e-05	1.1061e-05	1.01145e-05	1.05332e-05	1.07504e-05	9.89747e-06	9.55403e-06	1.04866e-05	1.03155e-05
Neuron_355	2.68691e-05	2.42957e-05	1.99358e-05	1.70673e-05	1.70787e-05	1.80697e-05	1.76937e-05	1.89312e-05	1.69201e-05	1.86582e-05	1.66812e-05	1.67353e-05	1.49093e-05	1.40905e-05	1.31047e-05	1.47209e-05	1.84072e-05	2.26724e-05	1.24796e-05	1.25082e-05	1.32476e-05	1.70746e-05	1.58734e-05	1.71451e-05	1.59447e-05	1.44214e-05	1.67524e-05	1.43022e-05	2.56591e-05	1.81974e-05	1.37454e-05	1.61667e-05	1.51559e-05	1.4549e-05	1.46975e-05	1.44832e-05	1.19183e-05	1.46119e-05	1.32773e-05	1.44054e-05	1.68085e-05	2.07725e-05	1.61159e-05	1.41254e-05	1.49763e-05	1.49665e-05	1.41802e-05	1.42808e-05	1.4058e-05
Neuron_356	2.63169e-05	2.13093e-05	1.85712e-05	1.53252e-05	1.49996e-05	1.63404e-05	1.72059e-05	1.76049e-05	1.53959e-05	1.91713e-05	1.62001e-05	1.59835e-05	1.32299e-05	1.70871e-05	1.55744e-05	1.50769e-05	1.5595e-05	1.91083e-05	1.44521e-05	1.49328e-05	1.49094e-05	1.53449e-05	1.74394e-05	1.8203e-05	1.58592e-05	1.43985e-05	1.55259e-05	1.35381e-05	1.96284e-05	1.62127e-05	1.36745e-05	1.55845e-05	1.52604e-05	1.21525e-05	1.25957e-05	1.28461e-05	1.1947e-05	1.47321e-05	1.20146e-05	1.48257e-05	1.56646e-05	1.86201e-05	1.59634e-05	1.39605e-05	1.54556e-05	1.28743e-05	1.2505e-05	1.41164e-05	1.40109e-05
Neuron_357	9.25536e-06	8.86198e-06	7.6055e-06	7.24193e-06	5.90861e-06	6.44615e-06	5.72854e-06	6.50899e-06	5.39407e-06	6.10267e-06	4.805e-06	6.56849e-06	5.48667e-06	4.74489e-06	5.11757e-06	5.35044e-06	7.20134e-06	1.29145e-05	6.11936e-06	6.79255e-06	6.30153e-06	7.51656e-06	8.85595e-06	1.03922e-05	6.63517e-06	7.80126e-06	7.45072e-06	6.93394e-06	1.60637e-05	8.2648e-06	7.00893e-06	7.13819e-06	7.10979e-06	4.47954e-06	5.16973e-06	5.53003e-06	4.90492e-06	5.738e-06	6.02994e-06	5.77801e-06	6.67784e-06	9.22777e-06	6.64636e-06	7.24269e-06	9.12637e-06	5.87817e-06	5.76344e-06	6.98321e-06	8.04695e-06
Neuron_358	2.47595e-05	2.04457e-05	1.31524e-05	1.28697e-05	1.08211e-05	1.00614e-05	9.45721e-06	1.14381e-05	1.08911e-05	1.06334e-05	9.0576e-06	9.98983e-06	1.09083e-05	9.84293e-06	9.97508e-06	1.05648e-05	1.19608e-05	2.22116e-05	8.83941e-06	1.0098e-05	1.15364e-05	1.01334e-05	9.73274e-06	1.17118e-05	9.67952e-06	9.67172e-06	1.14665e-05	1.11038e-05	2.31816e-05	1.63431e-05	1.3438e-05	1.27274e-05	1.22216e-05	1.03369e-05	9.53318e-06	1.02314e-05	8.22163e-06	1.2274e-05	1.19945e-05	1.00792e-05	1.79986e-05	1.46853e-05	1.22643e-05	1.03361e-05	1.19852e-05	9.15924e-06	9.84191e-06	1.20836e-05	1.26018e-05
Neuron_359	2.15331e-05	1.96752e-05	1.55922e-05	1.40771e-05	1.21804e-05	1.35751e-05	1.38787e-05	1.45351e-05	1.30919e-05	1.49157e-05	1.32065e-05	1.22826e-05	1.25837e-05	1.43491e-05	1.46872e-05	1.37136e-05	1.47619e-05	2.3013e-05	1.37849e-05	1.3651e-05	1.29986e-05	1.62667e-05	1.70645e-05	1.49742e-05	1.45696e-05	1.40083e-05	1.55588e-05	1.30143e-05	1.85506e-05	1.42403e-05	1.43231e-05	1.68523e-05	1.5585e-05	1.34486e-05	1.27293e-05	1.37923e-05	1.17525e-05	1.41199e-05	1.39056e-05	1.37051e-05	1.5892e-05	1.69088e-05	1.30943e-05	1.367e-05	1.5695e-05	1.46696e-05	1.28497e-05	1.29902e-05	1.1611e-05
Neuron_360	1.24733e-05	1.10268e-05	8.36154e-06	7.93167e-06	8.00068e-06	7.59225e-06	7.50952e-06	8.12627e-06	7.3446e-06	8.16363e-06	7.68292e-06	6.88654e-06	7.12976e-06	7.72268e-06	6.53327e-06	6.66297e-06	9.25657e-06	9.40846e-06	7.15119e-06	7.9159e-06	6.88967e-06	9.45311e-06	8.65755e-06	8.18107e-06	6.50559e-06	6.61146e-06	7.93998e-06	6.91813e-06	1.02829e-05	6.94471e-06	6.62602e-06	7.52912e-06	7.84236e-06	7.15376e-06	7.02965e-06	7.54495e-06	6.44639e-06	6.19978e-06	7.33802e-06	6.82455e-06	8.32111e-06	7.13077e-06	7.00426e-06	6.90705e-06	6.90565e-06	5.91806e-06	6.27033e-06	6.47099e-06	6.90937e-06
Neuron_361	2.65575e-05	2.05316e-05	1.66463e-05	1.57982e-05	1.46791e-05	1.59016e-05	1.49753e-05	1.53212e-05	1.48671e-05	1.68903e-05	1.59774e-05	1.52072e-05	1.29271e-05	1.55842e-05	1.55903e-05	1.42945e-05	1.45139e-05	2.08406e-05	1.24529e-05	1.39544e-05	1.20214e-05	1.66773e-05	1.69542e-05	1.73108e-05	1.28455e-05	1.28593e-05	1.28433e-05	1.13756e-05	1.59547e-05	1.37434e-05	1.13339e-05	1.33137e-05	1.27935e-05	1.23147e-05	1.25524e-05	1.18183e-05	1.17023e-05	1.49124e-05	1.17723e-05	1.32769e-05	1.38544e-05	1.65936e-05	1.50982e-05	1.30969e-05	1.2616e-05	1.23971e-05	1.17635e-05	1.1542e-05	1.27761e-05
Neuron_362	1.99794e-05	1.83637e-05	1.54539e-05	1.48574e-05	1.46538e-05	1.41253e-05	1.2903e-05	1.40605e-05	1.21831e-05	1.41859e-05	1.26134e-05	1.37497e-05	1.30625e-05	1.60458e-05	1.48834e-05	1.35925e-05	1.68678e-05	2.19782e-05	1.43856e-05	1.55183e-05	1.27128e-05	1.47738e-05	1.68246e-05	1.77099e-05	1.54105e-05	1.34184e-05	1.57199e-05	1.27912e-05	1.90135e-05	1.37173e-05	1.32542e-05	1.58187e-05	1.46804e-05	1.25638e-05	1.43745e-05	1.39802e-05	1.24706e-05	1.34433e-05	1.31352e-05	1.24556e-05	1.63593e-05	1.53114e-05	1.37297e-05	1.31031e-05	1.67032e-05	1.42023e-05	1.34229e-05	1.42891e-05	1.4486e-05
Neuron_363	1.64226e-05	1.25726e-05	1.06473e-05	8.06123e-06	8.75741e-06	7.91776e-06	8.69534e-06	8.64521e-06	7.05366e-06	9.4761e-06	7.95233e-06	7.92934e-06	8.91413e-06	9.94802e-06	8.90738e-06	8.80832e-06	8.59102e-06	1.15357e-05	8.18861e-06	7.9905e-06	8.16774e-06	8.27856e-06	9.27545e-06	9.20831e-06	9.05553e-06	7.71754e-06	9.01938e-06	7.86703e-06	9.51099e-06	9.55863e-06	8.32566e-06	9.36612e-06	8.87609e-06	7.47371e-06	7.81658e-06	7.21107e-06	7.12858e-06	8.2429e-06	8.56856e-06	7.93405e-06	1.10358e-05	9.84246e-06	8.14554e-06	8.25944e-06	9.23309e-06	7.48778e-06	7.20397e-06	7.9995e-06	7.82013e-06
Neuron_364	2.7172e-05	2.43724e-05	1.82896e-05	1.85089e-05	1.61341e-05	1.53413e-05	1.48007e-05	1.56631e-05	1.40881e-05	1.77273e-05	1.58403e-05	1.46218e-05	1.37541e-05	1.4692e-05	1.62288e-05	1.52192e-05	1.37081e-05	1.81735e-05	1.55359e-05	1.41486e-05	1.52544e-05	1.53056e-05	1.54195e-05	1.57815e-05	1.72494e-05	1.48335e-05	1.66392e-05	1.40549e-05	1.69166e-05	1.68846e-05	1.34927e-05	1.3592e-05	1.42868e-05	1.46198e-05	1.3729e-05	1.34151e-05	1.26188e-05	1.29449e-05	1.42377e-05	1.4515e-05	1.67747e-05	2.05138e-05	1.51997e-05	1.62997e-05	1.45568e-05	1.47362e-05	1.34013e-05	1.39664e-05	1.45435e-05
Neuron_365	2.58299e-05	2.0812e-05	1.65088e-05	1.44607e-05	1.43961e-05	1.49315e-05	1.52972e-05	1.5403e-05	1.25694e-05	1.75515e-05	1.56193e-05	1.47641e-05	1.20889e-05	1.5098e-05	1.46109e-05	1.41107e-05	1.41904e-05	1.60283e-05	1.32607e-05	1.46777e-05	1.39374e-05	1.50466e-05	1.70946e-05	1.63826e-05	1.38404e-05	1.33225e-05	1.39239e-05	1.26201e-05	1.861e-05	1.39833e-05	1.10928e-05	1.3844e-05	1.29039e-05	1.3053e-05	1.0588e-05	1.21961e-05	1.10999e-05	1.25742e-05	1.09848e-05	1.39802e-05	1.42535e-05	1.66952e-05	1.30298e-05	1.23614e-05	1.27254e-05	1.22881e-05	1.13309e-05	1.25623e-05	1.2972e-05
Neuron_366	2.31502e-05	1.9339e-05	1.60215e-05	1.36646e-05	1.41333e-05	1.24946e-05	1.34168e-05	1.37087e-05	1.15487e-05	1.23521e-05	1.2405e-05	1.15405e-05	1.21037e-05	1.30177e-05	1.348e-05	1.37679e-05	1.75251e-05	1.34521e-05	1.33919e-05	1.27842e-05	1.2855e-05	1.50628e-05	1.48491e-05	1.51396e-05	1.32695e-05	1.19712e-05	1.4879e-05	1.26823e-05	1.67041e-05	1.31942e-05	1.2332e-05	1.57373e-05	1.43251e-05	1.21336e-05	1.28163e-05	1.31936e-05	1.10074e-05	1.11418e-05	1.24837e-05	1.25737e-05	1.45247e-05	1.55018e-05	1.42849e-05	1.6159e-05	1.41339e-05	1.31344e-05	1.22073e-05	1.24235e-05	1.33348e-05
Neuron_367	2.00516e-05	1.69421e-05	1.37205e-05	1.19592e-05	1.31784e-05	1.32512e-05	1.39954e-05	1.37793e-05	1.23153e-05	1.34772e-05	1.23298e-05	1.27135e-05	1.0561e-05	1.28412e-05	1.44342e-05	1.3473e-05	1.40174e-05	1.53969e-05	1.42337e-05	1.42073e-05	1.315e-05	1.52373e-05	1.70673e-05	1.61231e-05	1.52855e-05	1.25784e-05	1.60331e-05	1.32247e-05	1.80803e-05	1.20586e-05	1.12193e-05	1.40639e-05	1.38236e-05	1.149e-05	1.30936e-05	1.24534e-05	1.11852e-05	1.19002e-05	1.06403e-05	1.16825e-05	1.27735e-05	1.60249e-05	1.15586e-05	1.12266e-05	1.46531e-05	1.24317e-05	1.18995e-05	1.22062e-05	1.21434e-05
Neuron_368	2.17394e-05	1.93688e-05	1.37103e-05	1.41886e-05	1.12737e-05	1.33514e-05	1.17263e-05	1.47446e-05	1.29781e-05	1.45109e-05	1.27797e-05	1.17887e-05	1.09591e-05	1.14095e-05	1.11014e-05	1.10143e-05	1.13164e-05	1.53191e-05	1.09878e-05	1.14127e-05	1.33468e-05	1.40287e-05	1.66819e-05	1.56595e-05	1.33731e-05	1.32164e-05	1.60417e-05	1.34952e-05	1.83438e-05	1.25274e-05	1.20267e-05	1.40809e-05	1.2181e-05	9.12896e-06	1.00929e-05	1.21676e-05	9.93645e-06	1.13241e-05	9.56974e-06	1.07915e-05	1.29887e-05	1.51356e-05	1.02826e-05	1.14786e-05	1.36818e-05	1.08089e-05	1.03219e-05	1.23234e-05	1.27066e-05
Neuron_369	1.53212e-05	1.31797e-05	1.12195e-05	9.22582e-06	7.89855e-06	7.41199e-06	8.17833e-06	8.55408e-06	7.46531e-06	1.05011e-05	8.05318e-06	8.198e-06	7.668e-06	9.54828e-06	8.88187e-06	8.81153e-06	8.91436e-06	1.50429e-05	8.98996e-06	8.61803e-06	9.75871e-06	8.55726e-06	9.498e-06	1.10802e-05	1.00829e-05	6.98063e-06	9.2875e-06	8.01337e-06	1.58022e-05	9.23753e-06	7.50601e-06	8.23729e-06	8.29504e-06	7.43918e-06	8.10078e-06	6.76489e-06	6.64076e-06	7.26819e-06	7.49397e-06	6.82174e-06	8.79404e-06	9.68555e-06	7.12076e-06	6.91533e-06	8.9511e-06	6.81359e-06	6.84536e-06	7.72457e-06	8.02034e-06
Neuron_370	1.10908e-05	9.14555e-06	6.57575e-06	5.98498e-06	5.60096e-06	5.83274e-06	5.39858e-06	6.43094e-06	6.52617e-06	6.85222e-06	6.24222e-06	6.25801e-06	6.39509e-06	6.69206e-06	6.08571e-06	5.54051e-06	6.79091e-06	1.23141e-05	4.81928e-06	5.23704e-06	5.00228e-06	5.26625e-06	6.45292e-06	1.15601e-05	6.31174e-06	5.94388e-06	6.95412e-06	5.97829e-06	9.07706e-06	7.48577e-06	6.50129e-06	7.46253e-06	6.156e-06	4.63988e-06	6.81239e-06	5.49662e-06	5.73243e-06	6.922e-06	6.21378e-06	5.74642e-06	1.10114e-05	7.8679e-06	7.00064e-06	5.52759e-06	7.51662e-06	6.17003e-06	5.21338e-06	5.54761e-06	5.92095e-06
Neuron_371	2.05764e-05	1.67019e-05	1.27681e-05	1.16292e-05	1.02184e-05	1.04472e-05	1.04939e-05	1.04597e-05	1.04328e-05	1.37352e-05	1.03879e-05	9.44774e-06	8.69921e-06	1.04117e-05	1.04177e-05	9.74794e-06	9.67619e-06	1.71419e-05	9.41825e-06	9.86675e-06	9.91049e-06	1.03976e-05	1.04483e-05	1.03804e-05	1.06366e-05	8.36723e-06	1.06392e-05	9.55688e-06	1.2296e-05	1.10826e-05	8.81723e-06	1.00805e-05	1.02903e-05	1.03197e-05	8.40566e-06	8.38872e-06	8.37167e-06	8.91571e-06	8.26971e-06	9.43416e-06	1.03303e-05	1.34186e-05	1.05958e-05	1.05326e-05	8.07293e-06	7.76961e-06	7.22717e-06	8.12706e-06	8.3735e-06
Neuron_372	1.42241e-05	1.39291e-05	9.96795e-06	1.03792e-05	8.67112e-06	7.42751e-06	6.71491e-06	8.93742e-06	7.89965e-06	7.46627e-06	6.54665e-06	6.66724e-06	7.70202e-06	8.28154e-06	7.92308e-06	7.21907e-06	8.01319e-06	1.20543e-05	7.79827e-06	7.50321e-06	7.60481e-06	8.34797e-06	8.58763e-06	7.98489e-06	6.87747e-06	6.79892e-06	7.31906e-06	5.9517e-06	1.08336e-05	7.55484e-06	7.2861e-06	9.20959e-06	8.099e-06	6.97592e-06	7.42715e-06	7.43696e-06	6.8221e-06	8.34993e-06	8.48761e-06	7.8412e-06	8.82328e-06	8.7626e-06	7.30538e-06	7.75462e-06	7.56264e-06	6.16866e-06	6.19894e-06	7.67857e-06	7.80371e-06
Neuron_373	1.79654e-05	1.48695e-05	1.18955e-05	9.82168e-06	1.01251e-05	9.78261e-06	1.07528e-05	1.16971e-05	1.03045e-05	1.18987e-05	1.07427e-05	9.72982e-06	9.73125e-06	1.07665e-05	1.0008e-05	1.03439e-05	1.09603e-05	1.22459e-05	9.59253e-06	9.45815e-06	9.96573e-06	1.09576e-05	1.12327e-05	1.10989e-05	9.87044e-06	9.42978e-06	1.12764e-05	9.34011e-06	1.29587e-05	1.02569e-05	9.79224e-06	1.12433e-05	1.05299e-05	9.29719e-06	1.0237e-05	1.06776e-05	8.52329e-06	9.48668e-06	9.54381e-06	9.78113e-06	1.16553e-05	1.08426e-05	9.25235e-06	1.03924e-05	1.03476e-05	9.23272e-06	9.15136e-06	9.37625e-06	9.37215e-06
Neuron_374	2.22706e-05	1.41755e-05	1.20409e-05	1.04648e-05	1.00848e-05	9.88016e-06	1.07692e-05	1.13372e-05	9.54589e-06	1.28657e-05	1.15813e-05	1.08715e-05	9.55321e-06	1.20928e-05	1.10301e-05	1.11306e-05	9.82933e-06	1.35326e-05	1.08611e-05	1.11157e-05	1.02509e-05	1.17819e-05	1.3763e-05	1.5483e-05	1.15189e-05	9.73979e-06	1.23035e-05	9.72514e-06	1.5079e-05	1.21622e-05	1.05228e-05	1.13592e-05	1.10475e-05	1.05623e-05	1.11776e-05	9.65923e-06	1.02645e-05	1.02171e-05	9.42829e-06	9.35414e-06	1.19315e-05	1.21067e-05	1.01047e-05	1.1022e-05	1.39227e-05	1.05445e-05	9.62959e-06	1.07319e-05	1.0038e-05
Neuron_375	1.60862e-05	1.55746e-05	1.18672e-05	1.17201e-05	1.03912e-05	1.15172e-05	9.67113e-06	1.15429e-05	1.02701e-05	1.10501e-05	1.0264e-05	9.43489e-06	9.04366e-06	1.04263e-05	1.03613e-05	9.07412e-06	1.08024e-05	1.4552e-05	1.13411e-05	1.10109e-05	1.10133e-05	1.22143e-05	1.44968e-05	1.09845e-05	1.09995e-05	1.08697e-05	1.14633e-05	9.46806e-06	1.68128e-05	1.06047e-05	9.45967e-06	1.18865e-05	1.17075e-05	8.62965e-06	8.90137e-06	9.43786e-06	8.44815e-06	1.14798e-05	9.62007e-06	1.00625e-05	1.25895e-05	1.27846e-05	1.06658e-05	1.0534e-05	1.11167e-05	1.10201e-05	9.94705e-06	1.06642e-05	1.095e-05
Neuron_376	2.96247e-05	2.38602e-05	2.05891e-05	1.73729e-05	1.83967e-05	1.75136e-05	1.92008e-05	1.86329e-05	1.76591e-05	1.85578e-05	1.77826e-05	1.62858e-05	1.61832e-05	1.79575e-05	1.8088e-05	1.76928e-05	1.86176e-05	2.24701e-05	1.72132e-05	1.69359e-05	1.39939e-05	1.88047e-05	2.02815e-05	2.18548e-05	1.71358e-05	1.59816e-05	1.69774e-05	1.54457e-05	1.99101e-05	1.83644e-05	1.52193e-05	1.681e-05	1.62034e-05	1.56949e-05	1.71716e-05	1.54193e-05	1.47302e-05	1.64278e-05	1.60889e-05	1.58236e-05	1.76422e-05	1.86967e-05	1.78124e-05	1.74963e-05	1.66342e-05	1.52508e-05	1.36482e-05	1.45118e-05	1.49686e-05
Neuron_377	2.5351e-05	2.15889e-05	1.59951e-05	1.36621e-05	1.19023e-05	9.93835e-06	1.05253e-05	1.19067e-05	9.46503e-06	1.4259e-05	1.03174e-05	1.18118e-05	1.11783e-05	1.34519e-05	1.05955e-05	1.03249e-05	1.14167e-05	1.64372e-05	9.42926e-06	1.01826e-05	1.1843e-05	1.16942e-05	1.14603e-05	1.48772e-05	1.27818e-05	1.07118e-05	1.21608e-05	1.18407e-05	1.75747e-05	1.29982e-05	1.27958e-05	1.17771e-05	1.21427e-05	9.01354e-06	9.91996e-06	1.13947e-05	9.70903e-06	1.39357e-05	1.17035e-05	1.27661e-05	1.21608e-05	1.17774e-05	1.27224e-05	1.01466e-05	1.30753e-05	9.12787e-06	1.17169e-05	1.30663e-05	1.24186e-05
Neuron_378	2.11298e-05	1.67306e-05	1.4161e-05	1.23443e-05	1.27955e-05	1.12642e-05	1.29372e-05	1.32838e-05	1.1375e-05	1.44318e-05	1.28114e-05	1.23892e-05	1.35764e-05	1.43798e-05	1.34466e-05	1.22996e-05	1.42835e-05	1.66494e-05	1.20709e-05	1.18251e-05	1.15078e-05	1.24136e-05	1.30342e-05	1.53463e-05	1.30057e-05	1.12537e-05	1.40643e-05	1.22707e-05	1.42316e-05	1.42125e-05	1.19155e-05	1.43052e-05	1.30351e-05	1.07089e-05	1.18937e-05	1.11945e-05	1.06888e-05	1.03402e-05	1.15367e-05	1.0424e-05	1.36356e-05	1.35885e-05	1.23439e-05	1.2834e-05	1.33959e-05	1.10651e-05	1.05524e-05	1.11735e-05	1.16811e-05
Neuron_379	1.53058e-05	1.4092e-05	1.14339e-05	9.68761e-06	9.15392e-06	8.7617e-06	9.69622e-06	9.42774e-06	8.07115e-06	1.08091e-05	9.96377e-06	9.25239e-06	9.02952e-06	9.55592e-06	9.86153e-06	8.45057e-06	1.06897e-05	1.35763e-05	8.47569e-06	8.3628e-06	7.74577e-06	8.1712e-06	9.44001e-06	8.80659e-06	8.64208e-06	7.11617e-06	9.06184e-06	8.16539e-06	1.03259e-05	9.68459e-06	8.82015e-06	9.88033e-06	9.14198e-06	8.17645e-06	9.16147e-06	8.80101e-06	8.15476e-06	7.64192e-06	8.578e-06	7.53722e-06	1.07485e-05	1.05734e-05	9.20862e-06	9.13119e-06	1.01546e-05	8.59384e-06	7.5756e-06	8.51527e-06	8.99605e-06
Neuron_380	2.86354e-05	2.25465e-05	1.78352e-05	1.45054e-05	1.35217e-05	1.38576e-05	1.40029e-05	1.49051e-05	1.3008e-05	1.85249e-05	1.61231e-05	1.35627e-05	1.02501e-05	1.43067e-05	1.37203e-05	1.35404e-05	1.5297e-05	2.17659e-05	1.3274e-05	1.4621e-05	1.37437e-05	1.50102e-05	1.67829e-05	1.65711e-05	1.45721e-05	1.30083e-05	1.47799e-05	1.24015e-05	1.95701e-05	1.6682e-05	1.09045e-05	1.44687e-05	1.40293e-05	1.15231e-05	1.14385e-05	1.18615e-05	1.09931e-05	1.26817e-05	1.15613e-05	1.14326e-05	1.47576e-05	1.75561e-05	1.31971e-05	1.31702e-05	1.23629e-05	1.23352e-05	1.05089e-05	1.19745e-05	1.41706e-05
Neuron_381	2.23076e-05	1.95984e-05	1.39526e-05	1.14329e-05	1.10164e-05	1.24853e-05	1.19561e-05	1.40277e-05	1.36075e-05	1.44065e-05	1.3253e-05	1.23334e-05	1.00146e-05	1.18241e-05	1.10464e-05	1.20346e-05	1.42239e-05	2.1613e-05	9.86893e-06	1.09252e-05	1.07906e-05	1.25751e-05	1.39136e-05	1.3537e-05	1.26764e-05	1.17143e-05	1.24286e-05	1.14844e-05	1.78878e-05	1.53269e-05	1.07872e-05	1.36109e-05	1.14123e-05	1.08075e-05	1.05073e-05	1.09509e-05	9.82916e-06	1.08386e-05	1.03244e-05	1.15575e-05	1.40207e-05	1.49838e-05	1.35206e-05	1.24228e-05	1.15726e-05	1.03082e-05	9.22388e-06	9.68401e-06	1.13156e-05
Neuron_382	2.68121e-05	1.86142e-05	1.65996e-05	1.34239e-05	1.23952e-05	1.06751e-05	1.34068e-05	1.30444e-05	1.0372e-05	1.72453e-05	1.24107e-05	1.34489e-05	1.2233e-05	1.63555e-05	1.23518e-05	1.02292e-05	1.26898e-05	2.02076e-05	1.06235e-05	1.12036e-05	1.1178e-05	1.25601e-05	1.24919e-05	1.64366e-05	1.33252e-05	1.06001e-05	1.2529e-05	1.20598e-05	2.21059e-05	1.3972e-05	1.21088e-05	1.35318e-05	1.39232e-05	9.65364e-06	1.1378e-05	1.04921e-05	1.13998e-05	1.2868e-05	1.056e-05	9.64439e-06	1.25183e-05	1.17577e-05	1.16056e-05	1.07165e-05	1.44773e-05	8.93992e-06	1.0196e-05	1.22766e-05	1.32363e-05
Neuron_383	1.33394e-05	1.25832e-05	8.5204e-06	8.72879e-06	8.10105e-06	8.84181e-06	7.86915e-06	8.39782e-06	7.42605e-06	8.96733e-06	6.64041e-06	7.20461e-06	6.3092e-06	7.40636e-06	6.84053e-06	7.642e-06	8.04278e-06	9.05751e-06	6.47207e-06	6.22325e-06	7.66755e-06	7.74586e-06	7.57598e-06	8.19943e-06	8.39154e-06	8.1323e-06	1.06426e-05	9.54605e-06	1.10551e-05	1.16389e-05	9.41739e-06	9.53964e-06	7.77877e-06	7.43974e-06	6.44343e-06	7.07416e-06	6.34791e-06	6.17372e-06	6.26569e-06	7.24962e-06	8.10026e-06	9.34541e-06	7.70924e-06	8.39618e-06	7.54586e-06	6.15634e-06	5.84019e-06	7.08296e-06	8.25508e-06
Neuron_384	1.55962e-05	1.43498e-05	9.76141e-06	9.37585e-06	9.56474e-06	9.37837e-06	8.2037e-06	1.00278e-05	8.73026e-06	1.04475e-05	9.07347e-06	9.37697e-06	8.41263e-06	9.28104e-06	8.31939e-06	8.63824e-06	9.05928e-06	1.25849e-05	7.51184e-06	8.157e-06	8.22689e-06	8.61812e-06	9.08576e-06	1.03349e-05	9.64671e-06	8.65367e-06	1.01899e-05	9.35621e-06	1.28026e-05	1.01767e-05	8.00461e-06	9.52587e-06	9.2321e-06	8.45531e-06	9.4562e-06	9.58543e-06	8.11854e-06	8.49742e-06	8.03769e-06	8.55596e-06	9.58954e-06	1.0901e-05	1.01789e-05	8.36258e-06	9.96645e-06	8.42817e-06	7.79846e-06	7.92544e-06	9.28724e-06
Neuron_385	1.82487e-05	1.68731e-05	1.31878e-05	1.17072e-05	1.2251e-05	1.13646e-05	1.16186e-05	1.26091e-05	1.03498e-05	1.31553e-05	1.1166e-05	1.10053e-05	1.10536e-05	1.24592e-05	1.05813e-05	1.07396e-05	1.3341e-05	1.47175e-05	1.08926e-05	1.08121e-05	1.02145e-05	1.22631e-05	1.19353e-05	1.25241e-05	1.28654e-05	9.66829e-06	1.21375e-05	1.09126e-05	1.32819e-05	1.15507e-05	1.02165e-05	1.18089e-05	1.08992e-05	1.00219e-05	1.1057e-05	1.13544e-05	1.03322e-05	1.06992e-05	1.04202e-05	1.04495e-05	1.37049e-05	1.30329e-05	1.15893e-05	1.02518e-05	1.27031e-05	1.1392e-05	1.17084e-05	1.10828e-05	1.16137e-05
Neuron_386	2.20484e-05	1.97189e-05	1.50662e-05	1.49343e-05	1.45376e-05	1.46853e-05	1.38259e-05	1.56627e-05	1.37703e-05	1.59104e-05	1.42852e-05	1.37079e-05	1.17402e-05	1.27839e-05	1.24388e-05	1.32572e-05	1.46297e-05	1.97224e-05	1.26768e-05	1.36145e-05	1.29337e-05	1.49354e-05	1.52563e-05	1.48404e-05	1.39162e-05	1.32873e-05	1.49951e-05	1.34368e-05	1.74815e-05	1.34898e-05	1.12834e-05	1.46799e-05	1.25244e-05	1.13152e-05	1.16658e-05	1.24162e-05	1.04773e-05	1.42938e-05	1.2508e-05	1.42841e-05	1.37526e-05	1.53271e-05	1.21249e-05	1.0973e-05	1.07487e-05	1.11204e-05	1.09274e-05	1.01759e-05	1.22298e-05
Neuron_387	1.32414e-05	1.19042e-05	7.67613e-06	7.26503e-06	5.33086e-06	7.34463e-06	4.43965e-06	6.57564e-06	7.33674e-06	7.93994e-06	6.82556e-06	6.26606e-06	5.19026e-06	5.9552e-06	5.70779e-06	6.01933e-06	9.00862e-06	1.19626e-05	5.03987e-06	5.4903e-06	5.88268e-06	7.06041e-06	7.70649e-06	1.04312e-05	6.36529e-06	7.11181e-06	8.03288e-06	6.93784e-06	1.41225e-05	1.00742e-05	6.57578e-06	7.24397e-06	6.1398e-06	5.411e-06	5.72419e-06	5.9903e-06	5.83887e-06	7.58225e-06	6.23843e-06	5.55438e-06	7.60263e-06	1.00435e-05	7.5866e-06	8.51653e-06	7.42972e-06	5.7883e-06	5.88359e-06	6.02008e-06	7.76711e-06
Neuron_388	1.90312e-05	1.45635e-05	1.18441e-05	1.03948e-05	9.30268e-06	9.54625e-06	1.024e-05	1.01109e-05	7.85934e-06	1.21015e-05	9.73781e-06	1.05772e-05	8.4479e-06	9.72812e-06	1.035e-05	8.4551e-06	1.01075e-05	1.35987e-05	9.42835e-06	9.66632e-06	9.76539e-06	8.66452e-06	1.17484e-05	1.08008e-05	1.1795e-05	8.08285e-06	1.0693e-05	8.90329e-06	1.15186e-05	8.73978e-06	7.90821e-06	9.94991e-06	9.44733e-06	8.0526e-06	9.69335e-06	8.58897e-06	8.8802e-06	7.81334e-06	7.68153e-06	7.73176e-06	1.0164e-05	1.19565e-05	1.00459e-05	9.14805e-06	1.06182e-05	8.57288e-06	7.78893e-06	8.37551e-06	9.55249e-06
Neuron_389	1.70772e-05	1.43157e-05	1.36855e-05	1.0037e-05	9.60083e-06	9.59653e-06	1.11292e-05	1.0628e-05	1.01049e-05	1.22115e-05	1.05702e-05	1.12248e-05	1.03465e-05	1.17533e-05	1.17077e-05	9.92237e-06	1.0768e-05	1.46011e-05	9.63101e-06	1.00926e-05	1.00266e-05	1.07281e-05	1.2227e-05	1.15077e-05	1.20992e-05	9.83852e-06	1.27797e-05	1.02274e-05	1.6008e-05	1.12233e-05	9.92356e-06	1.12581e-05	1.14017e-05	8.18384e-06	1.09915e-05	9.84521e-06	9.12879e-06	9.52116e-06	9.42009e-06	9.58737e-06	1.11777e-05	1.14682e-05	9.07016e-06	8.98287e-06	1.02439e-05	7.9503e-06	8.38464e-06	9.71446e-06	1.14436e-05
Neuron_390	2.25033e-05	1.75174e-05	1.2978e-05	1.10534e-05	9.6907e-06	8.96032e-06	9.49386e-06	1.07188e-05	9.664e-06	1.15574e-05	9.75114e-06	1.08683e-05	9.73967e-06	1.22222e-05	1.03185e-05	1.05583e-05	1.16642e-05	1.65181e-05	8.30251e-06	1.01202e-05	1.04092e-05	1.21277e-05	1.18376e-05	1.32789e-05	1.00831e-05	1.01298e-05	1.35809e-05	1.10173e-05	2.44672e-05	1.44501e-05	1.17128e-05	1.22031e-05	1.48355e-05	1.03794e-05	1.0749e-05	1.08143e-05	1.08737e-05	1.05907e-05	1.20456e-05	9.68587e-06	9.91178e-06	1.08702e-05	1.04432e-05	1.21064e-05	1.32027e-05	9.77036e-06	1.07139e-05	1.16519e-05	1.25148e-05
Neuron_391	1.63931e-05	1.12486e-05	8.72074e-06	8.57966e-06	8.27808e-06	7.64666e-06	8.16494e-06	9.003e-06	7.85463e-06	9.30948e-06	7.42246e-06	8.01055e-06	8.81967e-06	1.01876e-05	8.88262e-06	8.41121e-06	8.95356e-06	1.18272e-05	6.83406e-06	7.33802e-06	7.56492e-06	7.31575e-06	8.91812e-06	9.06305e-06	8.74129e-06	8.0923e-06	1.00749e-05	8.35775e-06	1.05438e-05	1.09578e-05	9.65847e-06	1.21156e-05	1.04927e-05	8.23192e-06	9.14e-06	7.63138e-06	6.87972e-06	7.7646e-06	7.43727e-06	7.58957e-06	9.49504e-06	9.1867e-06	7.96671e-06	9.64703e-06	9.53485e-06	7.62829e-06	7.33599e-06	7.7949e-06	8.55744e-06
Neuron_392	3.45277e-05	2.82896e-05	2.09356e-05	1.86288e-05	1.77883e-05	1.68475e-05	1.71635e-05	1.84711e-05	1.71531e-05	1.92405e-05	1.69942e-05	1.70434e-05	1.6291e-05	1.82786e-05	1.68648e-05	1.79208e-05	1.95291e-05	2.46821e-05	1.5085e-05	1.58408e-05	1.59372e-05	1.95746e-05	2.09438e-05	2.14821e-05	1.71136e-05	1.69275e-05	1.83131e-05	1.76908e-05	3.17779e-05	2.11158e-05	1.88759e-05	2.04617e-05	1.9132e-05	1.79571e-05	1.73133e-05	1.83507e-05	1.55027e-05	1.87128e-05	1.81445e-05	1.83391e-05	1.98395e-05	1.9721e-05	1.81657e-05	1.6748e-05	1.94946e-05	1.66184e-05	1.70183e-05	1.77461e-05	1.57238e-05
Neuron_393	1.79943e-05	1.70452e-05	1.29485e-05	1.24533e-05	1.12938e-05	1.19789e-05	7.58614e-06	1.17665e-05	1.12398e-05	1.18391e-05	1.05898e-05	9.04478e-06	8.48313e-06	9.00188e-06	9.78744e-06	9.6209e-06	1.03251e-05	2.14393e-05	9.64777e-06	1.05887e-05	1.01952e-05	1.20721e-05	1.60298e-05	1.25302e-05	1.08464e-05	1.10903e-05	1.16087e-05	9.89525e-06	1.47009e-05	1.13824e-05	1.01158e-05	1.4209e-05	1.24837e-05	1.0159e-05	1.02474e-05	1.06389e-05	9.41586e-06	1.22053e-05	9.2919e-06	9.65964e-06	1.10719e-05	1.23382e-05	1.01171e-05	1.01931e-05	1.05487e-05	8.78486e-06	8.52171e-06	9.65045e-06	1.15254e-05
Neuron_394	1.80204e-05	1.63075e-05	1.36899e-05	1.09923e-05	1.0008e-05	1.03909e-05	1.05702e-05	1.17683e-05	1.07742e-05	1.34456e-05	1.04874e-05	9.94052e-06	9.42785e-06	1.23082e-05	9.95629e-06	1.10794e-05	1.36673e-05	1.83009e-05	9.98825e-06	9.24113e-06	9.69675e-06	1.10992e-05	1.16614e-05	1.27792e-05	1.0647e-05	8.62393e-06	1.0342e-05	8.74466e-06	1.46262e-05	1.1851e-05	1.11714e-05	9.68082e-06	9.38119e-06	8.58713e-06	9.85221e-06	8.50976e-06	8.53987e-06	1.11891e-05	1.00318e-05	9.12694e-06	1.00528e-05	1.02277e-05	1.11181e-05	1.03544e-05	1.12282e-05	8.53284e-06	9.09159e-06	9.14043e-06	1.00556e-05
Neuron_395	2.63004e-05	2.07712e-05	1.67882e-05	1.41373e-05	1.30359e-05	1.48437e-05	1.3899e-05	1.53756e-05	1.4198e-05	1.92189e-05	1.54401e-05	1.42678e-05	1.19575e-05	1.46881e-05	1.34716e-05	1.35411e-05	1.50761e-05	2.14554e-05	1.2054e-05	1.40275e-05	1.20562e-05	1.52603e-05	1.58449e-05	1.58232e-05	1.27731e-05	1.21435e-05	1.2307e-05	1.04658e-05	1.65575e-05	1.42373e-05	1.09836e-05	1.24127e-05	1.37109e-05	1.35223e-05	1.21894e-05	1.11054e-05	1.29875e-05	1.40157e-05	1.18577e-05	1.29691e-05	1.37951e-05	1.60857e-05	1.52662e-05	1.21089e-05	1.13936e-05	1.01571e-05	9.40383e-06	9.94876e-06	9.9856e-06
Neuron_396	1.9842e-05	1.71897e-05	1.37122e-05	1.33168e-05	1.21756e-05	1.17639e-05	1.04734e-05	1.21878e-05	1.03038e-05	1.13268e-05	1.1225e-05	1.08825e-05	1.18495e-05	1.14294e-05	1.19087e-05	1.20824e-05	1.30712e-05	1.29534e-05	1.05729e-05	1.08569e-05	1.02049e-05	1.35953e-05	1.19159e-05	1.33392e-05	9.59832e-06	1.03309e-05	1.18899e-05	1.0184e-05	1.33868e-05	1.10937e-05	9.9018e-06	1.05993e-05	1.1509e-05	1.05863e-05	9.69389e-06	9.97031e-06	8.08144e-06	9.2727e-06	9.62207e-06	9.42627e-06	1.11742e-05	1.09998e-05	1.06073e-05	1.08974e-05	1.06337e-05	9.95889e-06	9.84662e-06	1.03383e-05	1.17149e-05
Neuron_397	1.44111e-05	1.10064e-05	8.11252e-06	8.48125e-06	7.80202e-06	7.59551e-06	7.20818e-06	8.26919e-06	8.17362e-06	8.8548e-06	7.7973e-06	8.08901e-06	7.58679e-06	8.73847e-06	8.87249e-06	8.88933e-06	9.42116e-06	1.05294e-05	8.76364e-06	8.40814e-06	8.95853e-06	9.5658e-06	1.11701e-05	1.11853e-05	9.6084e-06	9.06777e-06	1.13922e-05	9.84549e-06	1.56017e-05	1.08932e-05	9.3171e-06	1.0598e-05	8.99792e-06	9.5681e-06	8.39654e-06	7.94104e-06	6.86227e-06	6.82625e-06	7.30681e-06	7.87525e-06	8.61306e-06	8.69303e-06	8.21687e-06	1.01763e-05	1.06483e-05	8.1159e-06	7.89505e-06	9.14099e-06	9.40277e-06
Neuron_398	2.51985e-05	1.98535e-05	1.3521e-05	1.26723e-05	1.18383e-05	1.15593e-05	1.19474e-05	1.26119e-05	1.05577e-05	1.20676e-05	1.12622e-05	1.11731e-05	1.09635e-05	1.19337e-05	1.29682e-05	1.32103e-05	1.14433e-05	1.44852e-05	9.39742e-06	1.11432e-05	9.7429e-06	1.02931e-05	1.09744e-05	1.34311e-05	1.22758e-05	1.22514e-05	1.2476e-05	1.18512e-05	1.4429e-05	1.31459e-05	1.23632e-05	1.25815e-05	1.14757e-05	1.10962e-05	1.1519e-05	1.1621e-05	9.44188e-06	1.22353e-05	1.10608e-05	1.2123e-05	1.2705e-05	1.15084e-05	1.05886e-05	8.8755e-06	1.24291e-05	1.04826e-05	1.03024e-05	1.12365e-05	1.0658e-05
Neuron_399	1.4307e-05	1.36701e-05	9.11322e-06	7.37661e-06	6.97166e-06	7.15286e-06	6.40427e-06	8.83108e-06	6.57608e-06	7.82487e-06	7.1466e-06	6.80568e-06	6.72862e-06	7.15287e-06	6.63818e-06	6.54632e-06	6.92042e-06	8.91742e-06	6.3193e-06	7.20446e-06	7.42909e-06	7.48892e-06	7.97196e-06	9.23392e-06	6.66329e-06	6.83025e-06	7.15967e-06	6.67736e-06	1.15629e-05	7.80319e-06	7.1812e-06	9.24513e-06	7.94333e-06	5.75992e-06	5.66787e-06	6.79643e-06	5.92411e-06	7.37815e-06	7.96381e-06	7.65409e-06	9.14532e-06	8.53197e-06	7.75941e-06	7.10219e-06	8.38089e-06	6.7682e-06	6.60363e-06	8.72812e-06	9.37218e-06
Neuron_400	1.79302e-05	1.57323e-05	1.06848e-05	9.53131e-06	9.29028e-06	9.86964e-06	8.56778e-06	1.03436e-05	8.89268e-06	1.03956e-05	9.77275e-06	8.26016e-06	8.37013e-06	9.60007e-06	9.56565e-06	1.03238e-05	1.05581e-05	1.20033e-05	8.32583e-06	9.18863e-06	9.67308e-06	9.3628e-06	9.22327e-06	9.67632e-06	1.03184e-05	8.65386e-06	1.15501e-05	9.68236e-06	1.17532e-05	8.01761e-06	7.54539e-06	8.85587e-06	8.6277e-06	8.74571e-06	9.41273e-06	9.47148e-06	7.77999e-06	8.26399e-06	8.68778e-06	8.63882e-06	8.43097e-06	1.12932e-05	9.18688e-06	8.73882e-06	8.87218e-06	8.41197e-06	8.15105e-06	8.33115e-06	9.22462e-06
Neuron_401	2.12493e-05	1.69856e-05	1.30052e-05	1.10919e-05	1.04695e-05	1.12377e-05	1.04768e-05	1.14518e-05	1.08283e-05	1.1349e-05	1.03054e-05	1.14305e-05	1.04407e-05	1.29189e-05	1.1858e-05	1.15553e-05	1.0889e-05	1.37166e-05	1.00758e-05	1.11674e-05	9.8055e-06	1.02573e-05	1.10771e-05	1.10958e-05	1.14682e-05	1.17699e-05	1.16964e-05	1.07368e-05	1.46648e-05	1.168e-05	1.09015e-05	1.14872e-05	1.15089e-05	9.81949e-06	1.00294e-05	9.78812e-06	8.4774e-06	1.06061e-05	9.18987e-06	1.12631e-05	1.21607e-05	1.38593e-05	1.06975e-05	9.24094e-06	1.10857e-05	1.00264e-05	9.6288e-06	1.07042e-05	9.80219e-06
Neuron_402	1.73692e-05	1.57474e-05	1.25352e-05	1.19096e-05	1.13832e-05	1.13532e-05	1.14751e-05	1.2205e-05	1.07151e-05	1.23506e-05	1.20108e-05	9.83613e-06	9.75311e-06	1.20886e-05	1.12277e-05	1.07698e-05	1.29924e-05	1.5054e-05	1.09864e-05	1.07169e-05	9.61816e-06	1.14763e-05	1.2107e-05	1.39724e-05	1.13641e-05	1.11744e-05	1.2202e-05	1.07043e-05	1.33574e-05	1.09907e-05	1.00835e-05	1.14952e-05	1.11032e-05	1.11722e-05	1.14254e-05	1.12639e-05	9.63883e-06	1.02939e-05	1.08482e-05	1.01704e-05	1.28182e-05	1.49387e-05	1.21848e-05	1.15344e-05	1.15898e-05	1.11031e-05	1.01949e-05	1.01726e-05	1.20186e-05
Neuron_403	1.60803e-05	1.27648e-05	1.01517e-05	8.95549e-06	8.84082e-06	8.40911e-06	8.54355e-06	9.29403e-06	9.72545e-06	1.06215e-05	8.85281e-06	8.49435e-06	8.44336e-06	9.24335e-06	8.46502e-06	8.9303e-06	9.75727e-06	1.56735e-05	8.48965e-06	8.35089e-06	8.28024e-06	9.4719e-06	9.21776e-06	1.00499e-05	9.7363e-06	8.10316e-06	9.20252e-06	8.42224e-06	1.65252e-05	1.14956e-05	9.71623e-06	9.46167e-06	9.08005e-06	7.1854e-06	8.14185e-06	8.03086e-06	7.91394e-06	9.32025e-06	8.89325e-06	8.54294e-06	1.03415e-05	1.17551e-05	8.59445e-06	9.9231e-06	9.16833e-06	9.03129e-06	8.55335e-06	8.59327e-06	8.22132e-06
Neuron_404	1.40017e-05	1.3891e-05	1.22567e-05	9.86309e-06	9.00399e-06	9.38683e-06	9.39109e-06	9.4009e-06	8.35514e-06	1.06235e-05	9.21726e-06	9.91841e-06	9.61982e-06	1.0243e-05	9.2428e-06	9.7065e-06	9.6044e-06	1.14562e-05	9.62952e-06	8.86139e-06	9.53844e-06	9.52005e-06	9.10288e-06	9.77618e-06	1.02496e-05	8.64798e-06	1.11323e-05	8.04366e-06	1.16264e-05	8.58599e-06	9.36803e-06	7.97861e-06	8.45457e-06	8.18622e-06	7.85285e-06	7.68352e-06	6.96886e-06	9.22924e-06	8.81338e-06	8.64635e-06	1.0079e-05	1.13562e-05	8.56743e-06	8.84736e-06	1.03973e-05	9.51311e-06	8.57902e-06	9.26778e-06	9.1078e-06
Neuron_405	2.22238e-05	1.7896e-05	1.41783e-05	1.29009e-05	1.26974e-05	1.24474e-05	1.18608e-05	1.2646e-05	1.18818e-05	1.42176e-05	1.1926e-05	1.24273e-05	1.21126e-05	1.26477e-05	1.15179e-05	1.18954e-05	1.29092e-05	1.53045e-05	1.0324e-05	1.07609e-05	1.09199e-05	1.21864e-05	1.22961e-05	1.3721e-05	1.38706e-05	1.14439e-05	1.40975e-05	1.16599e-05	1.38054e-05	1.36884e-05	1.12312e-05	1.22518e-05	1.15844e-05	1.04205e-05	1.08442e-05	1.09966e-05	1.04992e-05	1.20093e-05	1.12415e-05	1.16237e-05	1.31672e-05	1.59625e-05	1.40682e-05	1.34278e-05	1.24189e-05	1.27274e-05	1.15225e-05	1.17822e-05	1.21131e-05
Neuron_406	2.98143e-05	2.55331e-05	1.85652e-05	2.05552e-05	1.82144e-05	1.75501e-05	1.57314e-05	1.75892e-05	1.56669e-05	1.74188e-05	1.67e-05	1.42868e-05	1.78266e-05	1.79003e-05	1.83944e-05	1.75849e-05	1.88042e-05	2.3615e-05	1.5144e-05	1.601e-05	1.55419e-05	1.66332e-05	1.53422e-05	1.78782e-05	1.43253e-05	1.45327e-05	1.67494e-05	1.63509e-05	2.10972e-05	1.88733e-05	1.73343e-05	1.83544e-05	1.66538e-05	1.72453e-05	1.59112e-05	1.75909e-05	1.39855e-05	1.70479e-05	1.62172e-05	1.56672e-05	1.87601e-05	2.03333e-05	1.66656e-05	1.7463e-05	1.45983e-05	1.61288e-05	1.53639e-05	1.67047e-05	1.62589e-05
Neuron_407	1.77243e-05	1.83325e-05	1.26497e-05	1.20315e-05	1.00649e-05	9.92933e-06	9.13829e-06	1.03601e-05	9.96019e-06	9.77197e-06	1.0007e-05	9.39154e-06	9.9897e-06	1.05269e-05	1.19612e-05	1.18048e-05	1.22038e-05	1.22331e-05	1.10807e-05	9.87881e-06	1.18714e-05	1.1605e-05	1.32186e-05	1.30384e-05	1.18801e-05	1.1433e-05	1.40705e-05	1.02829e-05	1.32317e-05	1.16014e-05	1.09718e-05	1.1896e-05	1.05999e-05	1.02515e-05	8.99372e-06	9.51366e-06	7.50655e-06	8.15944e-06	1.02427e-05	9.18811e-06	1.10755e-05	1.15179e-05	9.68851e-06	1.20792e-05	1.03591e-05	8.92562e-06	8.23036e-06	9.64913e-06	1.02348e-05
Neuron_408	2.38768e-05	2.02895e-05	1.56106e-05	1.20684e-05	1.11235e-05	1.00851e-05	1.10431e-05	1.12021e-05	1.05967e-05	1.16897e-05	1.0694e-05	1.11596e-05	1.28253e-05	1.17883e-05	1.16493e-05	1.23716e-05	1.13103e-05	1.65237e-05	1.0823e-05	1.0823e-05	1.36303e-05	1.12932e-05	1.18791e-05	1.33939e-05	1.17944e-05	1.27741e-05	1.39361e-05	1.24987e-05	1.62161e-05	1.45991e-05	1.29647e-05	1.30416e-05	1.20182e-05	1.18661e-05	1.05368e-05	1.05328e-05	7.95308e-06	1.18723e-05	1.15349e-05	1.10273e-05	1.25506e-05	1.17568e-05	1.01911e-05	1.14395e-05	1.19525e-05	9.64145e-06	9.61399e-06	1.12752e-05	1.05127e-05
Neuron_409	3.31671e-05	2.81171e-05	2.16614e-05	1.65731e-05	1.57218e-05	1.66252e-05	1.70619e-05	1.75369e-05	1.46834e-05	2.15446e-05	1.78273e-05	1.59366e-05	1.36786e-05	1.79006e-05	1.61006e-05	1.58383e-05	1.55846e-05	2.40936e-05	1.49759e-05	1.63782e-05	1.69256e-05	1.65121e-05	1.68815e-05	1.77249e-05	1.68602e-05	1.47472e-05	1.59771e-05	1.50603e-05	2.31652e-05	1.80928e-05	1.43138e-05	1.48585e-05	1.60493e-05	1.47684e-05	1.26979e-05	1.37363e-05	1.34326e-05	1.61552e-05	1.36721e-05	1.6139e-05	1.77622e-05	2.14097e-05	1.74361e-05	1.46061e-05	1.39215e-05	1.25286e-05	1.22786e-05	1.43505e-05	1.34403e-05
Neuron_410	9.35861e-06	8.56495e-06	7.43514e-06	6.82272e-06	6.03287e-06	6.63036e-06	5.25887e-06	6.54795e-06	5.25544e-06	6.80874e-06	5.22371e-06	5.4815e-06	4.69629e-06	5.73748e-06	5.68385e-06	5.769e-06	5.75897e-06	8.59574e-06	6.6345e-06	6.14525e-06	5.76516e-06	6.30622e-06	7.2009e-06	9.39272e-06	6.17617e-06	5.30449e-06	6.12633e-06	5.55327e-06	1.08401e-05	7.01713e-06	5.08924e-06	6.06455e-06	6.58188e-06	5.0413e-06	5.73542e-06	5.95684e-06	5.30693e-06	5.81999e-06	5.16132e-06	5.77056e-06	9.0634e-06	9.79812e-06	5.67722e-06	5.94683e-06	8.66181e-06	5.78216e-06	5.82643e-06	6.83823e-06	6.36654e-06
Neuron_411	1.94405e-05	1.67982e-05	1.30673e-05	1.21388e-05	1.10894e-05	1.11797e-05	1.12733e-05	1.16577e-05	1.12257e-05	1.37305e-05	1.22002e-05	1.02131e-05	1.05004e-05	1.20432e-05	1.21794e-05	1.22871e-05	1.32013e-05	1.56275e-05	1.08246e-05	1.06456e-05	1.15151e-05	1.07875e-05	1.19678e-05	1.18443e-05	1.17243e-05	1.06955e-05	1.31969e-05	1.08773e-05	1.20275e-05	1.12244e-05	1.07842e-05	1.11913e-05	1.02181e-05	1.32803e-05	1.09954e-05	9.8404e-06	8.90042e-06	1.00027e-05	9.9098e-06	9.14399e-06	1.02902e-05	1.30564e-05	1.18315e-05	1.18503e-05	9.7533e-06	9.58547e-06	8.60846e-06	9.98456e-06	1.048e-05
Neuron_412	1.988e-05	1.64454e-05	1.52061e-05	1.36244e-05	1.0893e-05	1.08383e-05	9.43565e-06	1.14567e-05	1.05762e-05	1.3101e-05	1.20021e-05	9.67962e-06	9.91765e-06	1.20664e-05	1.11821e-05	1.06661e-05	1.17095e-05	1.58061e-05	1.02127e-05	1.09971e-05	9.76345e-06	1.02534e-05	1.17776e-05	1.38674e-05	1.00898e-05	1.07011e-05	1.10041e-05	9.48885e-06	1.62992e-05	1.33616e-05	9.70915e-06	1.1859e-05	1.21701e-05	1.11729e-05	9.54166e-06	9.64043e-06	8.96778e-06	1.15467e-05	1.02702e-05	1.07633e-05	1.42254e-05	1.53037e-05	1.08794e-05	1.18191e-05	9.98533e-06	9.66644e-06	9.0728e-06	9.77796e-06	1.06983e-05
Neuron_413	2.26006e-05	2.0835e-05	1.7431e-05	1.28834e-05	1.23049e-05	1.26719e-05	1.22502e-05	1.40178e-05	1.12601e-05	1.56287e-05	1.18671e-05	1.20638e-05	1.18213e-05	1.45986e-05	1.19045e-05	1.15385e-05	1.40213e-05	1.68269e-05	1.20571e-05	1.25612e-05	1.37834e-05	1.22419e-05	1.4398e-05	1.43454e-05	1.40097e-05	1.10737e-05	1.27677e-05	1.06249e-05	1.55165e-05	1.3352e-05	1.20318e-05	1.42402e-05	1.38304e-05	9.67132e-06	1.16866e-05	1.16429e-05	1.16744e-05	1.40581e-05	1.02405e-05	1.21495e-05	1.36025e-05	1.45769e-05	1.22573e-05	1.11546e-05	1.27926e-05	9.1862e-06	9.90348e-06	1.29733e-05	1.32357e-05
Neuron_414	1.73022e-05	1.67904e-05	1.28354e-05	1.31664e-05	1.13862e-05	1.30796e-05	1.00056e-05	1.05748e-05	1.12421e-05	1.00521e-05	1.13366e-05	9.49945e-06	1.14202e-05	1.16217e-05	1.27183e-05	1.1137e-05	1.3382e-05	1.72474e-05	1.22958e-05	1.14845e-05	1.00884e-05	1.2302e-05	1.31408e-05	1.51403e-05	1.02821e-05	1.10448e-05	1.13841e-05	9.55178e-06	1.49333e-05	1.34937e-05	1.25172e-05	1.21714e-05	1.1615e-05	1.03237e-05	1.1066e-05	9.51934e-06	8.78505e-06	1.34825e-05	1.2076e-05	9.90275e-06	1.42405e-05	1.16565e-05	1.02817e-05	1.09853e-05	1.02009e-05	9.81943e-06	9.35762e-06	1.09083e-05	1.08676e-05
Neuron_415	3.39759e-05	2.89605e-05	1.9809e-05	1.80035e-05	1.69666e-05	1.82303e-05	1.56311e-05	1.88348e-05	1.7574e-05	1.90592e-05	1.67104e-05	1.68884e-05	1.55695e-05	1.93341e-05	1.85532e-05	1.79282e-05	1.83817e-05	2.50246e-05	1.5594e-05	1.65542e-05	1.44424e-05	1.74834e-05	1.81551e-05	2.15779e-05	1.73085e-05	1.56671e-05	1.77086e-05	1.66572e-05	1.7692e-05	1.65918e-05	1.57769e-05	1.60505e-05	1.4783e-05	1.49073e-05	1.64675e-05	1.6286e-05	1.4943e-05	1.72254e-05	1.7211e-05	1.57061e-05	1.87748e-05	2.07168e-05	1.90064e-05	1.95084e-05	1.86903e-05	1.65067e-05	1.47144e-05	1.60665e-05	1.78673e-05
Neuron_416	1.41817e-05	1.0453e-05	9.13589e-06	7.79863e-06	7.83127e-06	8.18455e-06	7.94451e-06	9.28232e-06	8.33052e-06	1.04587e-05	9.0183e-06	8.78337e-06	7.08631e-06	8.68039e-06	7.5137e-06	8.09431e-06	8.79433e-06	9.39847e-06	6.93255e-06	7.53004e-06	7.20816e-06	8.98997e-06	9.13668e-06	9.49194e-06	8.08173e-06	7.21175e-06	7.90662e-06	6.66773e-06	1.09452e-05	8.7124e-06	6.3633e-06	6.78344e-06	7.71808e-06	6.43381e-06	7.66525e-06	6.68342e-06	6.67311e-06	8.06569e-06	6.70243e-06	7.19253e-06	7.97294e-06	9.79778e-06	7.87897e-06	7.60461e-06	8.91413e-06	7.46235e-06	7.16364e-06	7.09222e-06	7.44553e-06
Neuron_417	2.15519e-05	1.6384e-05	1.4333e-05	1.38942e-05	1.20679e-05	1.2006e-05	1.06551e-05	1.23343e-05	1.26211e-05	1.19287e-05	1.24665e-05	1.1347e-05	1.17663e-05	1.22929e-05	1.22301e-05	1.1781e-05	1.4244e-05	1.89531e-05	1.1213e-05	1.17092e-05	9.88676e-06	1.27101e-05	1.347e-05	1.89446e-05	1.04033e-05	1.06796e-05	1.21602e-05	1.02673e-05	1.49862e-05	1.18629e-05	1.18452e-05	1.34148e-05	1.22705e-05	1.12496e-05	1.32013e-05	1.1802e-05	1.04428e-05	1.33219e-05	1.3142e-05	1.13166e-05	1.54403e-05	1.44148e-05	1.27322e-05	1.17827e-05	1.19968e-05	9.92411e-06	1.01173e-05	1.06418e-05	1.19002e-05
Neuron_418	1.31934e-05	1.08292e-05	8.4607e-06	6.90911e-06	7.07334e-06	6.62133e-06	6.87751e-06	7.30672e-06	6.59496e-06	7.36815e-06	6.76616e-06	6.92859e-06	6.48232e-06	7.71366e-06	7.41097e-06	7.69982e-06	7.64139e-06	1.1423e-05	8.08212e-06	9.18452e-06	6.62372e-06	7.14466e-06	8.8938e-06	8.9772e-06	7.94379e-06	7.50405e-06	8.10571e-06	6.51687e-06	8.76229e-06	7.29127e-06	7.19973e-06	7.09865e-06	8.28345e-06	8.32477e-06	8.87106e-06	7.72347e-06	7.08779e-06	8.245e-06	8.03969e-06	7.45447e-06	7.91677e-06	7.8555e-06	6.32028e-06	6.31805e-06	7.29917e-06	6.24731e-06	5.62644e-06	6.12903e-06	6.01749e-06
Neuron_419	1.79091e-05	1.78651e-05	1.43245e-05	1.13044e-05	1.13036e-05	1.12304e-05	1.13901e-05	1.20914e-05	1.0664e-05	1.19039e-05	1.16516e-05	9.93949e-06	1.01264e-05	1.24379e-05	1.22994e-05	1.26945e-05	1.40153e-05	1.45738e-05	1.13341e-05	1.10643e-05	9.89851e-06	1.28e-05	1.31001e-05	1.25206e-05	1.11646e-05	1.14996e-05	1.28776e-05	1.05095e-05	1.43419e-05	1.3243e-05	1.02029e-05	9.93199e-06	1.0264e-05	1.14118e-05	1.00059e-05	9.93625e-06	9.4899e-06	1.04466e-05	1.14029e-05	1.05814e-05	1.30693e-05	1.31164e-05	1.179e-05	1.20144e-05	1.15274e-05	1.09543e-05	9.25355e-06	1.05075e-05	1.11776e-05
Neuron_420	1.86288e-05	1.27616e-05	1.13544e-05	1.03131e-05	8.98059e-06	9.74681e-06	8.95217e-06	9.2852e-06	7.95712e-06	1.08315e-05	9.96511e-06	9.52965e-06	8.14792e-06	1.11491e-05	1.02229e-05	1.10242e-05	1.02829e-05	1.37725e-05	1.06977e-05	1.0752e-05	9.80274e-06	1.04344e-05	1.13046e-05	1.16078e-05	1.0446e-05	8.91182e-06	1.0758e-05	8.12016e-06	1.45952e-05	1.06069e-05	8.57714e-06	9.28636e-06	1.01627e-05	9.5975e-06	1.00675e-05	8.52598e-06	8.72606e-06	8.98286e-06	8.30637e-06	8.66385e-06	9.44856e-06	1.2461e-05	9.45956e-06	9.18306e-06	1.06979e-05	9.24803e-06	8.40668e-06	8.71867e-06	8.49241e-06
Neuron_421	1.92035e-05	1.64259e-05	1.42339e-05	1.28246e-05	1.27857e-05	1.23535e-05	1.23723e-05	1.2191e-05	1.11232e-05	1.32729e-05	1.3192e-05	1.10523e-05	1.25912e-05	1.41937e-05	1.38403e-05	1.21246e-05	1.40897e-05	1.61507e-05	1.09742e-05	1.13468e-05	1.00377e-05	1.29361e-05	1.4105e-05	1.39411e-05	1.14213e-05	1.17019e-05	1.31166e-05	1.11206e-05	1.79304e-05	1.20886e-05	1.17503e-05	1.29846e-05	1.30668e-05	1.1386e-05	1.22101e-05	1.20551e-05	1.05707e-05	1.13096e-05	1.10606e-05	1.089e-05	1.3197e-05	1.49335e-05	1.21382e-05	1.24253e-05	1.30211e-05	1.20755e-05	1.13102e-05	1.20596e-05	1.25251e-05
Neuron_422	3.02409e-05	2.37556e-05	2.06902e-05	1.7083e-05	1.70531e-05	1.74873e-05	1.95035e-05	1.82206e-05	1.58534e-05	2.09233e-05	1.90642e-05	1.70867e-05	1.40952e-05	1.82366e-05	1.62787e-05	1.63699e-05	1.87396e-05	2.36802e-05	1.55461e-05	1.75188e-05	1.49011e-05	1.81775e-05	1.95544e-05	1.98394e-05	1.71345e-05	1.57639e-05	1.66951e-05	1.4661e-05	2.45789e-05	1.81755e-05	1.34059e-05	1.64548e-05	1.68433e-05	1.49203e-05	1.42679e-05	1.34363e-05	1.3525e-05	1.40605e-05	1.24918e-05	1.51672e-05	1.58166e-05	1.85021e-05	1.67572e-05	1.53736e-05	1.68535e-05	1.48057e-05	1.38289e-05	1.51275e-05	1.44583e-05
Neuron_423	2.01981e-05	1.85998e-05	1.36487e-05	1.2951e-05	1.17647e-05	1.15687e-05	9.81569e-06	1.07519e-05	1.04533e-05	1.0615e-05	1.03915e-05	1.0097e-05	1.04433e-05	1.15341e-05	1.10244e-05	1.02433e-05	1.19755e-05	1.70607e-05	1.08527e-05	9.99765e-06	1.05583e-05	1.13734e-05	1.2001e-05	1.23461e-05	1.27496e-05	9.91178e-06	1.27935e-05	1.09045e-05	1.39874e-05	1.04893e-05	1.061e-05	1.18026e-05	9.96263e-06	8.94118e-06	1.11128e-05	1.03123e-05	9.1005e-06	1.07234e-05	9.80043e-06	9.07481e-06	1.24785e-05	1.34553e-05	1.20762e-05	9.87098e-06	1.16192e-05	9.97224e-06	9.1593e-06	1.02348e-05	1.01322e-05
Neuron_424	1.75464e-05	1.52355e-05	1.17771e-05	1.02829e-05	9.56234e-06	9.23372e-06	1.21438e-05	1.01032e-05	7.94694e-06	1.14025e-05	9.4218e-06	9.18201e-06	8.49652e-06	9.55072e-06	9.76867e-06	8.52901e-06	8.63177e-06	1.36386e-05	9.48292e-06	9.25911e-06	9.56294e-06	9.03296e-06	1.09722e-05	1.08914e-05	1.10861e-05	9.85141e-06	1.0577e-05	8.9605e-06	1.57166e-05	1.08328e-05	8.9047e-06	1.10518e-05	1.12464e-05	9.29288e-06	9.45032e-06	9.02748e-06	8.32689e-06	9.24366e-06	9.2428e-06	1.00468e-05	1.18401e-05	1.27224e-05	9.10825e-06	8.45579e-06	1.0289e-05	7.83172e-06	7.46451e-06	8.6675e-06	9.11181e-06
Neuron_425	2.06278e-05	1.81844e-05	1.44698e-05	1.18656e-05	1.20578e-05	1.28703e-05	1.32132e-05	1.24481e-05	1.1022e-05	1.34647e-05	1.30528e-05	1.1844e-05	1.21915e-05	1.38866e-05	1.31011e-05	1.29419e-05	1.41817e-05	1.54028e-05	1.12537e-05	1.17373e-05	1.09728e-05	1.24725e-05	1.25943e-05	1.27123e-05	1.27582e-05	1.18481e-05	1.48568e-05	1.19769e-05	1.47092e-05	1.2283e-05	1.11024e-05	1.26067e-05	1.20389e-05	1.14982e-05	1.34548e-05	1.2574e-05	1.0983e-05	1.19442e-05	1.2908e-05	1.2845e-05	1.37007e-05	1.35915e-05	1.17473e-05	1.05632e-05	1.14013e-05	1.0608e-05	1.00192e-05	1.04251e-05	1.12038e-05
Neuron_426	2.12368e-05	1.93222e-05	1.54732e-05	1.30742e-05	1.17204e-05	1.32544e-05	1.2562e-05	1.363e-05	1.16387e-05	1.44668e-05	1.3304e-05	1.14128e-05	1.17892e-05	1.46731e-05	1.40767e-05	1.2646e-05	1.19307e-05	1.68437e-05	1.15552e-05	1.34294e-05	1.13424e-05	1.4578e-05	1.49374e-05	1.51865e-05	1.19887e-05	1.21193e-05	1.50008e-05	1.1838e-05	1.66342e-05	1.36321e-05	1.24626e-05	1.36573e-05	1.2813e-05	1.19623e-05	1.08629e-05	1.19817e-05	9.96647e-06	1.25795e-05	1.18173e-05	1.13147e-05	1.45552e-05	1.47816e-05	1.18635e-05	1.1746e-05	1.26345e-05	1.13643e-05	1.04021e-05	1.17017e-05	1.1284e-05
Neuron_427	2.75422e-05	2.34341e-05	2.04177e-05	1.67288e-05	1.66726e-05	1.50098e-05	1.60274e-05	1.69633e-05	1.51862e-05	1.78048e-05	1.55475e-05	1.67608e-05	1.7226e-05	1.82308e-05	1.81762e-05	1.6479e-05	1.99263e-05	2.46479e-05	1.62603e-05	1.54366e-05	1.49912e-05	1.70289e-05	1.77498e-05	1.88685e-05	1.69226e-05	1.35492e-05	1.7393e-05	1.42781e-05	2.19551e-05	1.59656e-05	1.60257e-05	1.68531e-05	1.75912e-05	1.30445e-05	1.61897e-05	1.42879e-05	1.28058e-05	1.52972e-05	1.53653e-05	1.34757e-05	1.76093e-05	1.82986e-05	1.78084e-05	1.79143e-05	2.07113e-05	1.48071e-05	1.46746e-05	1.74255e-05	1.70555e-05
Neuron_428	1.59953e-05	1.57501e-05	1.20536e-05	1.07577e-05	1.0302e-05	1.06264e-05	9.99314e-06	1.03613e-05	9.52762e-06	1.02558e-05	1.01749e-05	1.10535e-05	9.60897e-06	1.08598e-05	1.16467e-05	1.02853e-05	1.42228e-05	1.66056e-05	1.11312e-05	1.07926e-05	1.03165e-05	1.16404e-05	1.25593e-05	1.32258e-05	1.17074e-05	1.08105e-05	1.29388e-05	1.0043e-05	1.81612e-05	9.80863e-06	9.49445e-06	9.82353e-06	1.13638e-05	9.21696e-06	1.13241e-05	1.0527e-05	8.65041e-06	1.05419e-05	1.05866e-05	1.02237e-05	1.17218e-05	1.28195e-05	1.06359e-05	1.02396e-05	1.33011e-05	1.14633e-05	1.19087e-05	1.17903e-05	1.20724e-05
Neuron_429	1.75141e-05	1.47984e-05	1.09144e-05	8.02271e-06	7.5936e-06	7.85176e-06	8.72405e-06	8.88726e-06	6.84689e-06	1.01967e-05	8.5002e-06	8.14904e-06	7.96822e-06	9.13635e-06	7.91763e-06	7.19857e-06	7.61829e-06	1.02886e-05	6.59675e-06	7.42339e-06	6.98075e-06	6.97545e-06	7.90475e-06	8.54816e-06	7.71015e-06	7.85288e-06	7.59466e-06	7.52404e-06	1.17864e-05	9.9878e-06	7.36961e-06	9.08941e-06	9.28304e-06	7.10146e-06	6.26193e-06	6.61245e-06	7.86895e-06	8.42607e-06	6.76513e-06	7.57676e-06	9.16877e-06	9.43247e-06	7.26415e-06	6.49391e-06	6.56189e-06	5.82962e-06	6.20458e-06	7.06247e-06	7.43176e-06
Neuron_430	1.19177e-05	9.71483e-06	6.01191e-06	6.0029e-06	5.00965e-06	4.53676e-06	4.46512e-06	4.99904e-06	5.032e-06	5.91496e-06	5.09183e-06	5.27461e-06	6.50951e-06	5.85153e-06	5.30116e-06	5.10943e-06	5.09707e-06	9.52698e-06	4.0181e-06	3.93578e-06	4.62151e-06	4.04471e-06	4.22429e-06	6.17261e-06	5.03807e-06	4.09339e-06	5.02999e-06	5.00147e-06	7.47609e-06	6.9263e-06	5.76936e-06	6.23871e-06	6.27122e-06	5.12153e-06	4.90006e-06	4.30614e-06	3.90227e-06	6.42092e-06	6.09532e-06	5.70535e-06	6.91396e-06	5.93236e-06	6.62685e-06	4.51122e-06	5.06867e-06	4.20367e-06	3.87072e-06	4.9079e-06	5.59849e-06
Neuron_431	2.2694e-05	1.99709e-05	1.46327e-05	1.25665e-05	1.42674e-05	1.24515e-05	1.36478e-05	1.32577e-05	1.1931e-05	1.46897e-05	1.21152e-05	1.19166e-05	1.24074e-05	1.18486e-05	1.11876e-05	1.30779e-05	1.20458e-05	1.94593e-05	1.03887e-05	1.15099e-05	1.17228e-05	1.30132e-05	1.1226e-05	1.15967e-05	1.08761e-05	1.0708e-05	1.17823e-05	1.1754e-05	1.83669e-05	1.77526e-05	1.25678e-05	1.47004e-05	1.32714e-05	1.08005e-05	1.08426e-05	1.11145e-05	9.14957e-06	1.24299e-05	1.10822e-05	1.32144e-05	1.37246e-05	1.18698e-05	1.2081e-05	1.1274e-05	1.04149e-05	1.01212e-05	1.11037e-05	1.06728e-05	1.07872e-05
Neuron_432	2.29211e-05	2.18092e-05	1.30775e-05	1.30836e-05	1.11158e-05	1.16822e-05	1.05608e-05	1.23082e-05	1.2816e-05	1.39643e-05	1.16594e-05	1.07812e-05	9.06629e-06	1.02366e-05	9.88799e-06	1.08659e-05	1.43261e-05	2.27693e-05	1.06037e-05	1.09923e-05	1.21937e-05	1.40896e-05	1.54199e-05	1.42501e-05	1.37843e-05	1.1392e-05	1.67658e-05	1.35777e-05	2.50608e-05	1.36694e-05	1.14182e-05	1.56885e-05	1.4199e-05	1.0686e-05	1.11497e-05	1.10793e-05	9.00123e-06	9.40651e-06	9.54807e-06	1.1147e-05	1.19212e-05	1.50144e-05	1.11679e-05	1.43477e-05	1.30291e-05	1.10927e-05	1.14248e-05	1.16693e-05	1.28212e-05
Neuron_433	1.55694e-05	1.3317e-05	9.90891e-06	9.2161e-06	7.72631e-06	9.01197e-06	7.96527e-06	9.65892e-06	8.22867e-06	8.99192e-06	8.24532e-06	8.76983e-06	9.41832e-06	1.02621e-05	9.53139e-06	9.03674e-06	8.17698e-06	1.4455e-05	7.78106e-06	8.97462e-06	8.34428e-06	9.98855e-06	1.06005e-05	1.07639e-05	8.37395e-06	8.8897e-06	9.02498e-06	8.31631e-06	1.56746e-05	1.16141e-05	1.10585e-05	1.06798e-05	1.04674e-05	1.01172e-05	8.12607e-06	9.31622e-06	8.27794e-06	1.09197e-05	9.23511e-06	8.1155e-06	1.16527e-05	1.02488e-05	1.01999e-05	8.91138e-06	1.02515e-05	8.82278e-06	8.29648e-06	8.88321e-06	8.84295e-06
Neuron_434	1.98239e-05	1.7024e-05	1.44604e-05	1.32782e-05	1.23289e-05	1.18375e-05	1.33151e-05	1.30557e-05	1.1869e-05	1.36541e-05	1.38588e-05	1.27245e-05	1.35423e-05	1.35001e-05	1.31607e-05	1.10199e-05	1.34738e-05	1.6944e-05	1.15112e-05	1.1132e-05	1.08236e-05	1.17803e-05	1.41814e-05	1.35938e-05	1.26288e-05	1.16035e-05	1.35862e-05	1.12906e-05	1.30022e-05	1.27432e-05	1.19987e-05	1.29043e-05	1.19222e-05	1.05315e-05	1.16166e-05	1.05714e-05	9.71586e-06	1.03894e-05	1.21327e-05	1.07204e-05	1.42575e-05	1.42198e-05	1.31613e-05	1.31814e-05	1.31092e-05	1.10361e-05	1.06231e-05	1.20997e-05	1.17099e-05
Neuron_435	2.64536e-05	2.18052e-05	1.46674e-05	1.29554e-05	1.22297e-05	1.20402e-05	1.19706e-05	1.30462e-05	1.21828e-05	1.18513e-05	1.17082e-05	1.04105e-05	1.1977e-05	1.3043e-05	1.34826e-05	1.25752e-05	1.24834e-05	1.69918e-05	1.2156e-05	1.21914e-05	1.25294e-05	1.21441e-05	1.45203e-05	1.37673e-05	1.33807e-05	1.21395e-05	1.60351e-05	1.29429e-05	1.51646e-05	1.4057e-05	1.23856e-05	1.46881e-05	1.37248e-05	1.08732e-05	1.14031e-05	1.08745e-05	9.57405e-06	1.08985e-05	1.20185e-05	1.03679e-05	1.68229e-05	1.27671e-05	1.2003e-05	1.27198e-05	1.28207e-05	1.10257e-05	1.0202e-05	1.17225e-05	1.17915e-05
Neuron_436	2.07815e-05	1.75757e-05	1.23636e-05	1.05268e-05	9.57358e-06	9.75868e-06	9.41129e-06	9.91587e-06	8.90138e-06	1.10537e-05	9.72492e-06	9.13343e-06	1.0292e-05	1.27991e-05	1.05849e-05	1.02587e-05	9.08595e-06	1.44997e-05	8.79227e-06	9.81901e-06	8.47754e-06	9.76327e-06	9.84916e-06	9.66087e-06	8.79422e-06	1.06341e-05	8.98019e-06	9.23926e-06	1.56413e-05	1.21889e-05	1.13102e-05	1.01736e-05	1.05493e-05	9.00173e-06	7.92721e-06	9.022e-06	7.7045e-06	1.14639e-05	1.0109e-05	9.1187e-06	1.18819e-05	9.56416e-06	8.5634e-06	7.89301e-06	8.26125e-06	7.98656e-06	8.12187e-06	9.16849e-06	8.12587e-06
Neuron_437	1.93672e-05	1.68191e-05	1.28837e-05	1.00586e-05	8.77017e-06	9.10453e-06	9.80018e-06	9.98488e-06	9.92155e-06	1.0533e-05	9.57587e-06	1.0309e-05	1.00899e-05	1.09078e-05	1.10968e-05	1.04179e-05	1.20131e-05	1.37981e-05	9.45216e-06	9.84851e-06	1.06916e-05	1.10056e-05	1.16992e-05	1.1121e-05	9.31016e-06	9.47193e-06	1.18554e-05	9.16298e-06	1.68903e-05	1.1655e-05	1.06359e-05	1.04421e-05	1.15462e-05	9.75531e-06	9.84848e-06	1.04206e-05	9.97366e-06	1.12083e-05	1.12996e-05	1.03675e-05	1.00024e-05	9.75198e-06	8.16172e-06	1.05028e-05	1.10578e-05	8.60187e-06	8.39526e-06	9.77832e-06	9.77671e-06
Neuron_438	2.30712e-05	2.02328e-05	1.65274e-05	1.35572e-05	1.15993e-05	1.41281e-05	1.36319e-05	1.33345e-05	1.17866e-05	1.43847e-05	1.2696e-05	1.1887e-05	1.16121e-05	1.54596e-05	1.43754e-05	1.41669e-05	1.38586e-05	1.82701e-05	1.27449e-05	1.55569e-05	1.13739e-05	1.48579e-05	1.4892e-05	1.24092e-05	1.29244e-05	1.37603e-05	1.34562e-05	1.16266e-05	1.63138e-05	1.5786e-05	1.36203e-05	1.14421e-05	1.10712e-05	1.18593e-05	9.87296e-06	1.16267e-05	1.09086e-05	1.36676e-05	1.29605e-05	1.12099e-05	1.41748e-05	1.51921e-05	1.15594e-05	1.25764e-05	1.07119e-05	1.10767e-05	1.07334e-05	1.19658e-05	1.23685e-05
Neuron_439	1.55029e-05	1.47412e-05	1.27065e-05	1.02642e-05	1.0198e-05	1.03666e-05	1.07155e-05	1.111e-05	1.02292e-05	1.22523e-05	1.05926e-05	9.80367e-06	8.11023e-06	9.44832e-06	7.93046e-06	9.33542e-06	1.00893e-05	1.36487e-05	9.8282e-06	9.58301e-06	1.04009e-05	1.12876e-05	1.109e-05	1.17292e-05	1.03505e-05	9.41604e-06	1.05525e-05	8.09729e-06	1.72224e-05	1.14627e-05	8.19816e-06	9.11304e-06	9.77495e-06	8.35721e-06	9.49232e-06	9.91432e-06	8.27855e-06	9.36075e-06	8.28188e-06	9.49904e-06	1.05458e-05	1.36391e-05	9.47061e-06	9.50393e-06	1.09264e-05	1.01465e-05	9.85138e-06	9.76235e-06	9.46889e-06
Neuron_440	4.24548e-05	3.70225e-05	2.70315e-05	2.47387e-05	2.4904e-05	2.56676e-05	2.4532e-05	2.64414e-05	2.22993e-05	2.64397e-05	2.44043e-05	2.33227e-05	2.22352e-05	2.21285e-05	2.09948e-05	2.27724e-05	2.33211e-05	2.6202e-05	1.96066e-05	2.04415e-05	2.21776e-05	2.49125e-05	2.46351e-05	2.49733e-05	2.48726e-05	2.28274e-05	2.47477e-05	2.35542e-05	2.90463e-05	2.65945e-05	2.0912e-05	2.32467e-05	2.05774e-05	2.16001e-05	2.12042e-05	2.31526e-05	1.76096e-05	2.0735e-05	2.08184e-05	2.21294e-05	2.35867e-05	2.80499e-05	2.32752e-05	2.12116e-05	2.10296e-05	2.04545e-05	1.99886e-05	2.11648e-05	2.13288e-05
Neuron_441	2.08105e-05	1.63168e-05	1.37908e-05	1.20582e-05	1.14871e-05	1.26651e-05	1.29747e-05	1.34975e-05	1.32747e-05	1.47792e-05	1.35188e-05	1.29323e-05	1.21677e-05	1.31877e-05	1.14388e-05	1.16241e-05	1.30501e-05	1.8018e-05	1.17039e-05	1.18237e-05	1.16714e-05	1.38207e-05	1.44996e-05	1.34078e-05	1.27752e-05	1.14576e-05	1.45357e-05	1.13556e-05	1.82128e-05	1.24167e-05	1.11073e-05	1.55295e-05	1.36647e-05	1.0107e-05	1.16332e-05	1.17639e-05	1.0829e-05	1.15005e-05	1.04116e-05	1.10448e-05	1.25667e-05	1.27084e-05	1.09969e-05	1.20065e-05	1.2198e-05	1.10068e-05	1.07378e-05	1.03714e-05	1.16668e-05
Neuron_442	2.10496e-05	1.91184e-05	1.67262e-05	1.23267e-05	1.21558e-05	1.0995e-05	1.21222e-05	1.15173e-05	1.04393e-05	1.44205e-05	1.1081e-05	1.17161e-05	9.28089e-06	1.30986e-05	1.0977e-05	1.14177e-05	1.36442e-05	1.89559e-05	1.16368e-05	1.11248e-05	1.26612e-05	1.43929e-05	1.2998e-05	1.37747e-05	1.33023e-05	9.73008e-06	1.36567e-05	1.02139e-05	1.67886e-05	1.10953e-05	1.0038e-05	1.17506e-05	1.24391e-05	1.01511e-05	1.17635e-05	1.00793e-05	1.00715e-05	9.91969e-06	9.74657e-06	1.10575e-05	1.15742e-05	1.39444e-05	1.13183e-05	1.16558e-05	1.27808e-05	9.47441e-06	9.4366e-06	1.09038e-05	1.13065e-05
Neuron_443	2.05114e-05	1.66725e-05	1.34552e-05	1.15009e-05	1.16123e-05	1.05599e-05	1.14842e-05	1.21774e-05	1.11228e-05	1.35794e-05	1.15032e-05	1.0834e-05	1.02569e-05	1.21057e-05	1.02869e-05	1.16372e-05	1.34177e-05	1.4476e-05	1.07176e-05	1.08196e-05	1.07868e-05	1.30718e-05	1.30351e-05	1.35342e-05	1.11561e-05	1.08445e-05	1.3581e-05	1.14144e-05	2.22275e-05	1.19469e-05	9.76957e-06	1.1488e-05	1.20124e-05	9.5226e-06	1.00415e-05	1.06811e-05	9.12263e-06	9.16874e-06	9.84034e-06	1.06451e-05	1.12128e-05	1.30186e-05	1.08388e-05	1.14605e-05	1.2823e-05	1.08531e-05	1.12272e-05	1.12071e-05	1.11812e-05
Neuron_444	1.83962e-05	1.40758e-05	1.0693e-05	1.06042e-05	1.14758e-05	8.9296e-06	9.42785e-06	1.03021e-05	8.24558e-06	1.15612e-05	1.04084e-05	9.70646e-06	9.63245e-06	1.04478e-05	9.67467e-06	9.19297e-06	8.65182e-06	1.41638e-05	1.06122e-05	9.51974e-06	9.34355e-06	9.49311e-06	1.14517e-05	1.1426e-05	1.09663e-05	9.3797e-06	1.08489e-05	9.00758e-06	1.58622e-05	1.06782e-05	8.75121e-06	1.16488e-05	1.14087e-05	8.72435e-06	9.34266e-06	1.00039e-05	9.27804e-06	9.89773e-06	9.42376e-06	9.38955e-06	1.21441e-05	9.92563e-06	9.6036e-06	8.32376e-06	1.25983e-05	9.08434e-06	9.06193e-06	9.6072e-06	1.00585e-05
Neuron_445	2.01311e-05	1.75339e-05	1.3076e-05	1.24982e-05	1.15994e-05	1.08865e-05	1.01046e-05	1.12844e-05	8.73448e-06	1.04117e-05	9.63175e-06	9.75363e-06	1.02676e-05	1.17674e-05	1.14926e-05	1.11352e-05	1.21589e-05	1.54575e-05	1.2189e-05	1.1105e-05	1.00536e-05	1.17477e-05	1.20684e-05	1.33618e-05	1.17623e-05	9.6678e-06	1.3463e-05	1.0012e-05	1.59753e-05	1.1421e-05	1.07596e-05	1.12383e-05	1.12259e-05	9.94954e-06	1.11607e-05	1.12737e-05	1.00744e-05	1.12982e-05	1.11105e-05	1.01872e-05	1.24093e-05	1.2727e-05	1.14883e-05	1.06673e-05	1.2328e-05	9.79282e-06	1.0335e-05	1.12069e-05	1.10999e-05
Neuron_446	3.45837e-05	2.63103e-05	1.84031e-05	1.81009e-05	1.60128e-05	1.67378e-05	1.60762e-05	1.69353e-05	1.37641e-05	1.78892e-05	1.52176e-05	1.42852e-05	1.4348e-05	1.58984e-05	1.72226e-05	1.54847e-05	1.41212e-05	2.23164e-05	1.56467e-05	1.59829e-05	1.6214e-05	1.43606e-05	1.79227e-05	1.75605e-05	1.7877e-05	1.52292e-05	1.69418e-05	1.59976e-05	1.9931e-05	1.73131e-05	1.40106e-05	1.72955e-05	1.75883e-05	1.70525e-05	1.52579e-05	1.46021e-05	1.40413e-05	1.31582e-05	1.32771e-05	1.39466e-05	1.62227e-05	1.9893e-05	1.56505e-05	1.58069e-05	1.49545e-05	1.41916e-05	1.29653e-05	1.35868e-05	1.55332e-05
Neuron_447	1.93548e-05	1.4763e-05	1.21112e-05	1.09759e-05	1.06813e-05	1.08523e-05	1.20269e-05	1.16909e-05	1.08366e-05	1.30346e-05	1.04238e-05	9.4557e-06	8.70433e-06	1.12449e-05	1.04822e-05	1.01644e-05	1.23947e-05	1.43199e-05	9.31754e-06	1.02866e-05	9.5971e-06	1.25917e-05	1.25249e-05	1.19397e-05	1.05456e-05	8.89073e-06	1.27891e-05	9.504e-06	1.42626e-05	1.12631e-05	9.05438e-06	1.18797e-05	1.21246e-05	1.03574e-05	9.71978e-06	9.22176e-06	9.10483e-06	8.91847e-06	9.0873e-06	1.03711e-05	1.09223e-05	1.22061e-05	1.05296e-05	1.10412e-05	9.90774e-06	8.87111e-06	9.51231e-06	9.84318e-06	1.005e-05
Neuron_448	1.6999e-05	1.40929e-05	1.18752e-05	9.44634e-06	8.31704e-06	9.7431e-06	9.70288e-06	9.39467e-06	9.00033e-06	1.09704e-05	1.01159e-05	9.12609e-06	6.68776e-06	9.78041e-06	9.71614e-06	8.90505e-06	1.20558e-05	1.35947e-05	8.78949e-06	9.6247e-06	7.95322e-06	1.03744e-05	1.063e-05	1.02205e-05	8.45754e-06	7.74309e-06	8.6773e-06	7.04897e-06	1.21506e-05	8.2699e-06	6.9212e-06	8.34982e-06	9.32986e-06	8.17283e-06	7.96206e-06	6.93236e-06	7.06767e-06	8.11136e-06	6.88793e-06	8.38417e-06	9.00467e-06	1.12212e-05	9.19764e-06	8.28298e-06	8.36615e-06	8.02138e-06	7.28533e-06	7.00136e-06	7.22363e-06
Neuron_449	2.53687e-05	2.06375e-05	1.67999e-05	1.6271e-05	1.53371e-05	1.38086e-05	1.38423e-05	1.40761e-05	1.27649e-05	1.49699e-05	1.32958e-05	1.30141e-05	1.43242e-05	1.51131e-05	1.54453e-05	1.33879e-05	1.41791e-05	1.65952e-05	1.33436e-05	1.27518e-05	1.25233e-05	1.3612e-05	1.40806e-05	1.57403e-05	1.3368e-05	1.24589e-05	1.4253e-05	1.187e-05	1.41373e-05	1.41611e-05	1.24529e-05	1.21294e-05	1.36799e-05	1.2917e-05	1.23007e-05	1.16827e-05	1.09179e-05	1.30217e-05	1.30272e-05	1.12013e-05	1.57476e-05	1.60946e-05	1.40384e-05	1.46336e-05	1.36319e-05	1.26924e-05	1.11853e-05	1.30529e-05	1.33384e-05
Neuron_450	1.96021e-05	1.52857e-05	1.31892e-05	1.09401e-05	1.0758e-05	1.02327e-05	1.01411e-05	1.13305e-05	1.04414e-05	1.19841e-05	1.12258e-05	1.0883e-05	1.11504e-05	1.23126e-05	1.26307e-05	1.19592e-05	1.28479e-05	1.34585e-05	1.04939e-05	1.00919e-05	1.10192e-05	1.15749e-05	1.27989e-05	1.34214e-05	1.2531e-05	1.13427e-05	1.23748e-05	1.00546e-05	1.44749e-05	1.12799e-05	1.07002e-05	1.07431e-05	1.03206e-05	9.62956e-06	1.08647e-05	9.60975e-06	8.68512e-06	1.04365e-05	9.90364e-06	9.11006e-06	1.10588e-05	1.09756e-05	1.0741e-05	1.18308e-05	1.33165e-05	1.07614e-05	9.85797e-06	1.12638e-05	1.10505e-05
Neuron_451	1.91239e-05	1.50006e-05	1.28276e-05	1.02929e-05	1.07458e-05	1.01951e-05	1.0818e-05	9.93711e-06	8.69048e-06	1.18218e-05	1.02426e-05	1.0134e-05	9.88379e-06	1.07465e-05	9.9873e-06	9.2687e-06	1.04227e-05	1.37255e-05	9.63417e-06	1.03942e-05	9.02128e-06	1.17042e-05	9.77707e-06	9.88734e-06	9.49311e-06	8.12536e-06	1.01919e-05	8.32361e-06	1.35307e-05	1.0158e-05	9.5248e-06	1.10099e-05	1.02149e-05	9.06277e-06	1.08328e-05	1.06934e-05	9.61898e-06	9.18748e-06	9.12868e-06	8.95795e-06	9.23008e-06	1.05794e-05	8.92657e-06	8.30102e-06	9.65899e-06	8.36346e-06	8.56587e-06	8.96812e-06	9.13382e-06
Neuron_452	1.78256e-05	1.65979e-05	1.23999e-05	1.21515e-05	1.02973e-05	1.18661e-05	1.00097e-05	1.17438e-05	1.17975e-05	1.22882e-05	1.11813e-05	1.10475e-05	1.01243e-05	1.0496e-05	9.78815e-06	1.05561e-05	1.357e-05	1.99292e-05	8.98792e-06	1.03343e-05	9.78941e-06	1.12906e-05	1.33459e-05	1.51827e-05	1.17521e-05	1.12756e-05	1.31863e-05	1.1216e-05	2.22159e-05	1.34145e-05	1.04061e-05	1.10341e-05	1.00097e-05	9.00008e-06	1.09263e-05	1.03828e-05	8.0421e-06	1.00123e-05	1.00142e-05	9.4363e-06	1.19027e-05	1.47588e-05	1.12017e-05	9.77123e-06	1.13385e-05	9.4161e-06	9.17065e-06	9.55883e-06	1.04431e-05
Neuron_453	2.05405e-05	2.00738e-05	1.59605e-05	1.38606e-05	1.13984e-05	1.18481e-05	1.10195e-05	1.07708e-05	1.03446e-05	1.28277e-05	1.07982e-05	1.07731e-05	1.18381e-05	1.35096e-05	1.33329e-05	1.13135e-05	1.2413e-05	1.85732e-05	1.24952e-05	1.28361e-05	1.07716e-05	1.20541e-05	1.22231e-05	1.17572e-05	1.20019e-05	1.13064e-05	1.28109e-05	1.0671e-05	1.37447e-05	1.26888e-05	1.20452e-05	1.18838e-05	1.19517e-05	1.00384e-05	9.82511e-06	1.07952e-05	9.81006e-06	1.28e-05	1.19012e-05	1.00585e-05	1.33947e-05	1.35585e-05	1.16993e-05	1.06954e-05	1.11523e-05	9.62674e-06	9.68578e-06	1.11913e-05	1.12559e-05
Neuron_454	1.86032e-05	1.45167e-05	1.20262e-05	1.0682e-05	9.97127e-06	9.67052e-06	1.03175e-05	1.10949e-05	1.0945e-05	1.22536e-05	1.11275e-05	1.08449e-05	9.61451e-06	1.02841e-05	9.58959e-06	9.65071e-06	1.17209e-05	1.51376e-05	9.68937e-06	1.04738e-05	8.88239e-06	1.28081e-05	1.094e-05	1.24493e-05	8.82285e-06	8.23145e-06	9.19899e-06	8.90939e-06	1.65064e-05	1.01238e-05	7.79364e-06	9.41705e-06	9.83671e-06	7.60501e-06	9.00136e-06	9.16183e-06	9.76124e-06	1.00867e-05	9.94774e-06	9.51596e-06	9.60093e-06	1.08748e-05	9.32229e-06	9.08233e-06	9.20815e-06	8.34036e-06	8.48304e-06	8.38133e-06	8.94478e-06
Neuron_455	1.86608e-05	1.64228e-05	1.34945e-05	1.18801e-05	1.20002e-05	1.22175e-05	1.32552e-05	1.18942e-05	1.071e-05	1.27672e-05	1.24687e-05	1.08274e-05	1.14839e-05	1.30893e-05	1.28943e-05	1.1991e-05	1.40268e-05	1.52464e-05	1.19495e-05	1.24998e-05	1.08759e-05	1.16939e-05	1.31412e-05	1.26183e-05	1.21783e-05	1.0615e-05	1.31374e-05	1.03918e-05	1.43855e-05	1.18231e-05	9.56529e-06	1.1126e-05	1.06688e-05	9.76753e-06	1.07513e-05	1.08638e-05	1.00724e-05	9.38642e-06	1.05582e-05	1.04158e-05	1.32556e-05	1.38449e-05	1.14299e-05	1.09778e-05	1.17791e-05	1.11961e-05	1.04687e-05	1.03244e-05	1.14658e-05
Neuron_456	1.88852e-05	1.60427e-05	1.29399e-05	1.23694e-05	1.13759e-05	1.0988e-05	1.10625e-05	1.03328e-05	1.06171e-05	1.08533e-05	1.03462e-05	8.92439e-06	1.04115e-05	1.16899e-05	1.09461e-05	9.80294e-06	1.24239e-05	1.38747e-05	8.82506e-06	8.62676e-06	7.04742e-06	9.39775e-06	9.87077e-06	1.03152e-05	8.42428e-06	8.65918e-06	1.04741e-05	9.43124e-06	1.69171e-05	1.12554e-05	1.11836e-05	1.23485e-05	1.15127e-05	8.6576e-06	9.71633e-06	1.02386e-05	9.24302e-06	9.90153e-06	9.85534e-06	9.00029e-06	1.21694e-05	1.15911e-05	9.22972e-06	1.12358e-05	1.10137e-05	1.04456e-05	1.03283e-05	1.1022e-05	1.12311e-05
Neuron_457	1.92476e-05	1.49824e-05	1.11385e-05	9.28052e-06	8.98094e-06	7.60265e-06	8.37033e-06	8.81189e-06	1.00244e-05	8.8719e-06	8.21364e-06	8.49373e-06	9.62552e-06	8.87603e-06	9.13677e-06	9.75788e-06	1.0806e-05	2.06427e-05	1.09801e-05	9.13632e-06	8.25796e-06	1.05526e-05	1.08606e-05	1.25989e-05	9.70816e-06	9.31933e-06	9.09769e-06	8.66703e-06	1.9067e-05	1.12202e-05	1.06831e-05	1.08632e-05	1.12283e-05	8.04909e-06	9.61742e-06	8.01732e-06	7.22727e-06	9.63584e-06	1.00524e-05	8.0906e-06	1.10401e-05	8.60012e-06	8.29083e-06	9.15004e-06	9.35745e-06	7.28151e-06	7.99964e-06	9.1067e-06	8.47806e-06
Neuron_458	2.55463e-05	2.05462e-05	1.47807e-05	1.48626e-05	1.49679e-05	1.53051e-05	1.63503e-05	1.60011e-05	1.42359e-05	1.57159e-05	1.45304e-05	1.56197e-05	1.53087e-05	1.50811e-05	1.56301e-05	1.48405e-05	1.45381e-05	1.81791e-05	1.30374e-05	1.31452e-05	1.20193e-05	1.52106e-05	1.56849e-05	1.8305e-05	1.46187e-05	1.42542e-05	1.61017e-05	1.44606e-05	1.49037e-05	1.98769e-05	1.52592e-05	1.86358e-05	1.58702e-05	1.25259e-05	1.37171e-05	1.25048e-05	1.16293e-05	1.35651e-05	1.23252e-05	1.37308e-05	1.63318e-05	1.51094e-05	1.51249e-05	1.30766e-05	1.35679e-05	1.25293e-05	1.24549e-05	1.1302e-05	1.26255e-05
Neuron_459	2.06536e-05	1.72778e-05	1.14259e-05	1.07504e-05	9.53929e-06	9.20506e-06	8.52892e-06	9.64743e-06	8.66097e-06	8.3189e-06	8.73482e-06	8.6381e-06	1.09487e-05	9.68468e-06	9.59304e-06	9.08895e-06	8.40683e-06	1.60111e-05	7.24944e-06	8.06718e-06	8.87998e-06	7.92682e-06	7.3206e-06	8.7655e-06	7.59362e-06	9.39277e-06	9.52403e-06	9.51825e-06	1.42915e-05	1.21236e-05	1.04844e-05	1.03031e-05	1.08646e-05	9.07581e-06	7.8257e-06	8.41081e-06	6.55407e-06	1.09708e-05	9.64692e-06	8.62113e-06	1.11364e-05	9.29195e-06	9.44653e-06	8.62372e-06	9.11066e-06	8.52039e-06	8.50325e-06	1.00876e-05	1.01979e-05
Neuron_460	7.07481e-06	5.79544e-06	4.91472e-06	6.0332e-06	4.87376e-06	4.02797e-06	3.51853e-06	4.03059e-06	4.51928e-06	4.48117e-06	4.0563e-06	4.21982e-06	3.80877e-06	3.59652e-06	3.94371e-06	3.83948e-06	5.50222e-06	6.90768e-06	3.48646e-06	4.22716e-06	3.30255e-06	4.18094e-06	4.89509e-06	5.97624e-06	4.3396e-06	4.04951e-06	4.53275e-06	3.81278e-06	8.77537e-06	5.24901e-06	4.1528e-06	5.01598e-06	5.14222e-06	3.73441e-06	3.69694e-06	3.20175e-06	2.84161e-06	3.58511e-06	4.9815e-06	4.6079e-06	4.9684e-06	5.42054e-06	4.17722e-06	4.51213e-06	3.99103e-06	2.60492e-06	2.51239e-06	3.07572e-06	3.42247e-06
Neuron_461	2.28422e-05	1.62801e-05	1.37667e-05	1.07121e-05	1.01517e-05	9.49398e-06	1.04135e-05	1.10085e-05	9.49854e-06	1.25668e-05	1.07445e-05	1.06092e-05	9.78228e-06	1.14708e-05	1.08557e-05	1.00601e-05	1.32516e-05	1.452e-05	9.37836e-06	9.94615e-06	8.70818e-06	1.1336e-05	1.18481e-05	1.40216e-05	1.08248e-05	9.49395e-06	1.29523e-05	9.95169e-06	1.65503e-05	1.19214e-05	1.02336e-05	1.14548e-05	1.2883e-05	8.9706e-06	1.08812e-05	9.04405e-06	9.17517e-06	9.67473e-06	1.11693e-05	9.29646e-06	1.19799e-05	1.19117e-05	9.81376e-06	1.18223e-05	1.19557e-05	9.53445e-06	9.84152e-06	1.1257e-05	1.04972e-05
Neuron_462	1.67508e-05	1.41334e-05	1.04325e-05	9.37183e-06	8.51943e-06	8.76654e-06	8.2583e-06	9.44999e-06	8.1239e-06	9.25297e-06	8.483e-06	8.31586e-06	9.11406e-06	1.05429e-05	9.97092e-06	9.63675e-06	9.21855e-06	1.4613e-05	8.56862e-06	8.21203e-06	8.17753e-06	9.32299e-06	9.61697e-06	9.75326e-06	1.00564e-05	1.03224e-05	9.50052e-06	8.69133e-06	1.29923e-05	1.12455e-05	1.0836e-05	9.36589e-06	9.13766e-06	8.10626e-06	8.19415e-06	8.82983e-06	7.93171e-06	1.00765e-05	9.07517e-06	8.13523e-06	1.00502e-05	9.99758e-06	9.06482e-06	7.2833e-06	8.60035e-06	7.46816e-06	7.83539e-06	8.60858e-06	8.12155e-06
Neuron_463	2.077e-05	1.85455e-05	1.26267e-05	1.21819e-05	1.2134e-05	1.06456e-05	1.03087e-05	1.19268e-05	9.88495e-06	1.08301e-05	9.80706e-06	1.01889e-05	1.01339e-05	1.14046e-05	1.25138e-05	1.17101e-05	1.0833e-05	1.44751e-05	9.32571e-06	1.09072e-05	9.99976e-06	1.00099e-05	1.14485e-05	1.13947e-05	1.14956e-05	1.04506e-05	1.17298e-05	1.11286e-05	1.23296e-05	1.04245e-05	1.00792e-05	1.18161e-05	1.03601e-05	8.85134e-06	1.06903e-05	1.02181e-05	8.56529e-06	1.03296e-05	8.81603e-06	1.08949e-05	1.17247e-05	1.36417e-05	1.22121e-05	1.04488e-05	1.20927e-05	9.98489e-06	1.05089e-05	1.09379e-05	1.08726e-05
Neuron_464	1.75568e-05	1.53607e-05	1.11066e-05	1.00428e-05	8.62952e-06	9.13286e-06	8.81148e-06	9.82283e-06	9.43335e-06	1.04184e-05	7.97865e-06	8.24198e-06	8.61931e-06	1.17187e-05	1.10201e-05	9.83658e-06	9.26814e-06	1.37874e-05	8.57549e-06	9.62639e-06	9.70511e-06	9.96365e-06	1.11368e-05	1.09906e-05	1.01745e-05	1.04879e-05	1.23707e-05	1.02547e-05	1.11842e-05	1.1666e-05	9.76457e-06	1.08456e-05	9.87122e-06	9.1743e-06	8.06103e-06	9.09447e-06	8.3855e-06	9.71603e-06	8.70416e-06	8.1676e-06	1.02165e-05	1.03005e-05	8.63236e-06	9.53323e-06	9.22816e-06	8.40331e-06	7.73236e-06	8.77956e-06	9.55764e-06
Neuron_465	1.38263e-05	1.19022e-05	8.72232e-06	9.54048e-06	8.61405e-06	9.58367e-06	7.94237e-06	9.8989e-06	8.54191e-06	8.80184e-06	7.28581e-06	7.37293e-06	6.69855e-06	7.16164e-06	7.59988e-06	6.8943e-06	7.69278e-06	9.82677e-06	9.52854e-06	8.94204e-06	9.74783e-06	1.07249e-05	1.26285e-05	1.21114e-05	8.86541e-06	8.78673e-06	9.3314e-06	7.84298e-06	1.65827e-05	8.38819e-06	7.75075e-06	1.02581e-05	9.18035e-06	6.61019e-06	6.83537e-06	8.85981e-06	7.21964e-06	8.15899e-06	6.80001e-06	7.86952e-06	8.76323e-06	1.018e-05	7.50604e-06	9.14069e-06	1.20485e-05	8.26282e-06	7.27061e-06	8.78821e-06	8.8076e-06
Neuron_466	3.03735e-05	2.56795e-05	2.07955e-05	2.0242e-05	1.81791e-05	1.90548e-05	1.7715e-05	1.933e-05	1.64019e-05	2.13295e-05	1.92364e-05	1.77956e-05	1.34595e-05	1.8171e-05	1.68131e-05	1.74897e-05	1.79485e-05	2.01381e-05	1.63594e-05	1.91951e-05	1.70112e-05	1.89012e-05	2.05126e-05	2.02199e-05	1.7001e-05	1.67071e-05	1.70757e-05	1.55349e-05	2.33926e-05	1.85232e-05	1.50896e-05	1.67227e-05	1.60698e-05	1.4836e-05	1.39104e-05	1.49235e-05	1.33599e-05	1.60751e-05	1.35419e-05	1.68384e-05	1.64545e-05	2.34206e-05	1.74656e-05	1.58132e-05	1.75791e-05	1.59757e-05	1.47833e-05	1.54416e-05	1.54997e-05
Neuron_467	2.19478e-05	1.79765e-05	1.42873e-05	1.3767e-05	1.26084e-05	1.32187e-05	1.30255e-05	1.33445e-05	1.32943e-05	1.46371e-05	1.33214e-05	1.17176e-05	1.43225e-05	1.46926e-05	1.48987e-05	1.25594e-05	1.17295e-05	2.1336e-05	1.20322e-05	1.32592e-05	1.29644e-05	1.44287e-05	1.68154e-05	1.4912e-05	1.35667e-05	1.33787e-05	1.48921e-05	1.23507e-05	1.50355e-05	1.49331e-05	1.39977e-05	1.49423e-05	1.38597e-05	1.23342e-05	1.163e-05	1.07732e-05	1.08039e-05	1.3253e-05	1.3868e-05	1.21069e-05	1.79211e-05	1.308e-05	1.14113e-05	1.27105e-05	1.37529e-05	1.19891e-05	1.11919e-05	1.22215e-05	1.11834e-05
Neuron_468	1.87344e-05	1.78369e-05	1.05653e-05	1.03099e-05	9.0045e-06	9.9498e-06	7.5776e-06	1.06701e-05	8.34102e-06	9.60024e-06	7.5258e-06	8.31574e-06	9.09424e-06	8.88267e-06	8.37286e-06	8.24852e-06	7.89699e-06	1.39575e-05	8.07161e-06	8.3924e-06	9.2249e-06	8.28558e-06	1.0324e-05	9.97599e-06	1.07894e-05	9.25523e-06	1.11283e-05	1.02217e-05	1.29479e-05	1.10147e-05	1.01895e-05	1.09184e-05	9.03998e-06	8.80637e-06	8.35956e-06	9.54661e-06	6.70606e-06	9.60724e-06	8.18281e-06	8.77433e-06	1.0042e-05	1.17518e-05	9.8193e-06	8.19328e-06	8.93842e-06	7.9443e-06	7.8733e-06	9.38262e-06	9.96686e-06
Neuron_469	2.42027e-05	2.12697e-05	1.5482e-05	1.33541e-05	1.2538e-05	1.23552e-05	1.17349e-05	1.31159e-05	1.06181e-05	1.0671e-05	1.04201e-05	1.04053e-05	1.23475e-05	1.19597e-05	1.23269e-05	1.24556e-05	1.22344e-05	1.41822e-05	1.03377e-05	1.0858e-05	1.12913e-05	1.24916e-05	1.39252e-05	1.46994e-05	1.12235e-05	1.28104e-05	1.35917e-05	1.15214e-05	1.62723e-05	1.28202e-05	1.26567e-05	1.56603e-05	1.37607e-05	1.07199e-05	1.06511e-05	1.23586e-05	9.95639e-06	1.21792e-05	1.14904e-05	1.19101e-05	1.31272e-05	1.17357e-05	1.00255e-05	1.12892e-05	1.31185e-05	1.0061e-05	1.01344e-05	1.18308e-05	1.13758e-05
Neuron_470	2.03617e-05	1.65074e-05	1.31274e-05	9.56101e-06	8.70253e-06	8.23292e-06	9.80423e-06	1.0357e-05	8.34709e-06	1.18033e-05	9.6361e-06	9.49371e-06	8.53641e-06	1.04745e-05	9.87898e-06	8.89444e-06	1.0848e-05	1.41387e-05	7.95089e-06	8.87148e-06	8.68474e-06	1.02164e-05	9.97447e-06	1.03573e-05	9.50497e-06	8.0982e-06	1.06841e-05	9.27327e-06	1.6727e-05	1.19001e-05	9.0287e-06	1.00114e-05	1.22713e-05	8.72528e-06	1.05384e-05	9.52431e-06	9.56885e-06	8.25471e-06	9.67896e-06	8.96052e-06	1.03931e-05	1.15477e-05	1.00586e-05	1.12299e-05	1.15747e-05	9.31841e-06	9.95541e-06	1.14671e-05	1.16093e-05
Neuron_471	2.44905e-05	1.95783e-05	1.55451e-05	1.4639e-05	1.45085e-05	1.36875e-05	1.36688e-05	1.52206e-05	1.26323e-05	1.50968e-05	1.36411e-05	1.30597e-05	1.28012e-05	1.36893e-05	1.31819e-05	1.33158e-05	1.49387e-05	2.02412e-05	1.3811e-05	1.37686e-05	1.38342e-05	1.53433e-05	1.74004e-05	2.07224e-05	1.48572e-05	1.24941e-05	1.60237e-05	1.50967e-05	1.99465e-05	1.59128e-05	1.4598e-05	1.68285e-05	1.46285e-05	1.31622e-05	1.52752e-05	1.4871e-05	1.29313e-05	1.41832e-05	1.46082e-05	1.39054e-05	1.68771e-05	1.93189e-05	1.54028e-05	1.53031e-05	1.63567e-05	1.31984e-05	1.30105e-05	1.40979e-05	1.40124e-05
Neuron_472	2.21278e-05	1.77056e-05	1.37382e-05	1.10592e-05	1.08303e-05	1.15349e-05	1.03571e-05	1.19199e-05	1.04388e-05	1.30794e-05	1.12025e-05	1.11688e-05	8.8712e-06	1.12098e-05	1.11612e-05	1.06533e-05	1.03319e-05	1.24975e-05	1.06901e-05	1.12676e-05	1.09991e-05	1.15308e-05	1.35867e-05	1.27165e-05	1.24117e-05	9.97865e-06	1.25938e-05	1.07319e-05	1.5425e-05	1.06221e-05	9.19776e-06	1.12216e-05	1.07897e-05	8.6791e-06	1.0107e-05	1.03703e-05	9.79154e-06	1.00821e-05	8.89664e-06	1.02142e-05	1.17474e-05	1.39109e-05	1.12302e-05	1.00707e-05	1.356e-05	1.04247e-05	9.75105e-06	1.07505e-05	9.92505e-06
Neuron_473	3.66768e-05	3.16261e-05	2.22142e-05	2.07035e-05	1.9059e-05	1.7396e-05	1.699e-05	1.91015e-05	1.86907e-05	1.81078e-05	1.69664e-05	1.66612e-05	1.91207e-05	1.85855e-05	1.84881e-05	1.76908e-05	1.84362e-05	2.83492e-05	1.66536e-05	1.67747e-05	1.66063e-05	1.9218e-05	1.93498e-05	2.08782e-05	1.84427e-05	1.8298e-05	1.86341e-05	1.74545e-05	2.64002e-05	2.21597e-05	2.1167e-05	2.12797e-05	2.047e-05	1.74765e-05	1.75108e-05	1.67522e-05	1.42224e-05	2.01317e-05	1.93629e-05	1.6309e-05	2.1986e-05	1.75262e-05	1.74111e-05	1.64447e-05	1.73254e-05	1.44718e-05	1.58879e-05	1.79126e-05	1.64382e-05
Neuron_474	1.6512e-05	1.53982e-05	1.1852e-05	1.10729e-05	9.57149e-06	9.74758e-06	8.87304e-06	1.09473e-05	9.86887e-06	1.02446e-05	9.093e-06	8.85388e-06	8.70904e-06	9.35512e-06	9.91435e-06	9.67503e-06	9.42472e-06	1.41763e-05	8.95992e-06	9.15934e-06	1.01234e-05	1.08108e-05	1.23156e-05	9.80072e-06	1.05138e-05	9.42177e-06	1.12322e-05	9.0204e-06	1.17038e-05	1.07916e-05	8.84552e-06	1.10699e-05	9.02328e-06	8.65129e-06	7.78708e-06	8.67671e-06	7.58235e-06	9.88682e-06	1.00755e-05	9.21828e-06	9.94665e-06	1.13115e-05	1.00527e-05	1.11091e-05	1.00881e-05	9.94486e-06	9.03931e-06	9.00757e-06	1.00876e-05
Neuron_475	2.0158e-05	1.7316e-05	1.19475e-05	1.10359e-05	9.44786e-06	1.01296e-05	9.84293e-06	1.05202e-05	1.01985e-05	1.14183e-05	9.13587e-06	9.56972e-06	9.39019e-06	1.07124e-05	9.58868e-06	1.01469e-05	9.24059e-06	1.59532e-05	9.06901e-06	9.42001e-06	1.1168e-05	1.07914e-05	1.1304e-05	1.04345e-05	1.03862e-05	1.03754e-05	1.15827e-05	1.00082e-05	1.37387e-05	1.28146e-05	1.16799e-05	1.23357e-05	1.07724e-05	9.80651e-06	8.49046e-06	9.56754e-06	8.43042e-06	1.19525e-05	1.0344e-05	1.04581e-05	1.27628e-05	1.13199e-05	9.1934e-06	9.88815e-06	8.53434e-06	8.2938e-06	8.15573e-06	1.01787e-05	1.05568e-05
Neuron_476	3.26465e-05	2.72393e-05	2.32144e-05	2.16807e-05	2.1656e-05	2.1293e-05	2.21626e-05	2.33048e-05	2.07766e-05	2.22769e-05	2.2251e-05	1.93215e-05	2.19905e-05	2.47351e-05	2.3931e-05	2.26902e-05	2.52734e-05	2.74199e-05	1.98881e-05	2.04467e-05	1.91715e-05	2.12558e-05	2.3885e-05	2.27936e-05	2.23169e-05	1.98833e-05	2.36214e-05	1.97624e-05	2.60257e-05	1.99362e-05	1.9453e-05	2.27362e-05	2.10687e-05	1.96296e-05	2.09725e-05	2.1288e-05	1.93969e-05	1.95805e-05	2.01649e-05	1.9234e-05	2.40511e-05	2.43358e-05	2.02641e-05	2.03101e-05	2.28929e-05	2.17526e-05	1.99374e-05	2.0382e-05	2.1275e-05
Neuron_477	2.33568e-05	1.83491e-05	1.61513e-05	1.54414e-05	1.52463e-05	1.47966e-05	1.48714e-05	1.50296e-05	1.33395e-05	1.41943e-05	1.46094e-05	1.40264e-05	1.55275e-05	1.62328e-05	1.78335e-05	1.6047e-05	1.64299e-05	1.7866e-05	1.61786e-05	1.45031e-05	1.52614e-05	1.71088e-05	1.78945e-05	1.81724e-05	1.73027e-05	1.68626e-05	1.92697e-05	1.48557e-05	1.84652e-05	1.85546e-05	1.67463e-05	1.71156e-05	1.56551e-05	1.3695e-05	1.32148e-05	1.28597e-05	1.20127e-05	1.46931e-05	1.63325e-05	1.33446e-05	2.07099e-05	1.63815e-05	1.45416e-05	1.71216e-05	1.65406e-05	1.53616e-05	1.35055e-05	1.38436e-05	1.37844e-05
Neuron_478	1.51232e-05	1.38374e-05	1.03044e-05	9.63341e-06	9.24735e-06	9.60492e-06	9.10774e-06	1.01914e-05	8.31706e-06	1.00617e-05	9.13355e-06	9.18986e-06	7.9868e-06	8.80192e-06	7.60666e-06	8.48401e-06	9.82114e-06	1.27144e-05	7.2005e-06	7.53697e-06	7.37791e-06	9.18883e-06	9.32615e-06	9.79452e-06	9.42554e-06	8.38878e-06	1.03878e-05	8.29932e-06	1.14511e-05	1.00091e-05	7.93821e-06	8.93176e-06	8.48581e-06	7.57244e-06	8.38539e-06	8.36478e-06	7.22279e-06	7.7381e-06	8.06944e-06	8.18294e-06	8.90279e-06	1.16369e-05	9.70877e-06	7.94812e-06	9.47815e-06	8.27587e-06	8.09386e-06	7.87537e-06	8.50938e-06
Neuron_479	1.39489e-05	1.23279e-05	7.2267e-06	7.78889e-06	6.74476e-06	6.8755e-06	5.17322e-06	7.78335e-06	6.267e-06	7.78338e-06	5.31739e-06	6.29616e-06	6.29273e-06	6.00532e-06	6.34882e-06	6.37304e-06	5.33249e-06	1.14868e-05	7.41434e-06	7.57885e-06	8.09418e-06	8.49734e-06	9.93893e-06	1.06151e-05	9.12432e-06	7.29823e-06	7.59855e-06	7.61209e-06	1.6784e-05	8.87554e-06	7.62329e-06	7.43627e-06	7.88186e-06	5.91627e-06	6.38173e-06	6.77906e-06	5.16728e-06	7.01764e-06	6.53789e-06	6.26107e-06	8.65246e-06	9.16758e-06	6.44811e-06	6.79418e-06	9.54968e-06	6.58734e-06	6.74248e-06	7.71283e-06	8.11939e-06
Neuron_480	2.02533e-05	1.80936e-05	1.63597e-05	1.16937e-05	1.08112e-05	1.32646e-05	1.31365e-05	1.27818e-05	1.23278e-05	1.37767e-05	1.13261e-05	1.10781e-05	1.16937e-05	1.34883e-05	1.27563e-05	1.17712e-05	1.20585e-05	1.6064e-05	1.1719e-05	1.2181e-05	1.22257e-05	1.22868e-05	1.3905e-05	1.26425e-05	1.353e-05	1.1647e-05	1.43316e-05	1.10476e-05	1.33998e-05	1.31206e-05	1.10188e-05	1.21894e-05	1.18413e-05	1.07708e-05	1.10956e-05	1.10638e-05	9.9856e-06	1.21433e-05	1.09966e-05	1.0773e-05	1.40663e-05	1.41576e-05	1.14632e-05	1.11333e-05	1.19935e-05	1.09148e-05	1.00081e-05	1.10466e-05	1.08681e-05
Neuron_481	1.8155e-05	1.58188e-05	1.01005e-05	1.01132e-05	8.68788e-06	9.92775e-06	7.79159e-06	8.75809e-06	9.09805e-06	9.91006e-06	8.76489e-06	8.692e-06	8.74677e-06	8.95056e-06	8.70743e-06	8.70964e-06	9.22093e-06	1.37431e-05	7.66871e-06	7.63405e-06	9.32679e-06	9.49094e-06	9.25866e-06	9.43215e-06	9.6794e-06	9.60681e-06	1.06211e-05	9.52825e-06	1.47452e-05	1.19707e-05	1.02566e-05	9.87079e-06	8.85411e-06	9.66516e-06	9.98719e-06	1.02519e-05	7.81913e-06	1.02201e-05	9.0352e-06	7.96992e-06	9.50405e-06	1.16901e-05	8.85823e-06	9.24563e-06	8.48022e-06	8.29011e-06	8.99077e-06	9.68763e-06	9.23371e-06
Neuron_482	1.578e-05	1.37438e-05	1.18099e-05	1.09468e-05	9.51874e-06	1.04785e-05	9.58616e-06	1.09729e-05	9.88091e-06	1.17855e-05	9.32087e-06	9.28476e-06	9.47996e-06	9.3755e-06	8.83064e-06	9.95036e-06	1.12075e-05	1.62691e-05	1.03239e-05	1.16451e-05	1.13128e-05	1.1591e-05	1.18038e-05	1.35221e-05	9.94052e-06	1.03547e-05	1.10245e-05	1.03855e-05	1.92069e-05	1.39301e-05	1.24649e-05	1.26769e-05	1.21795e-05	8.52609e-06	9.24623e-06	9.62599e-06	8.05949e-06	1.12911e-05	9.15116e-06	9.88373e-06	1.30959e-05	1.45121e-05	1.04184e-05	9.31436e-06	1.21347e-05	9.94976e-06	1.00191e-05	1.14526e-05	1.04861e-05
Neuron_483	2.00826e-05	1.63302e-05	1.46899e-05	1.31688e-05	1.31456e-05	1.27533e-05	1.23985e-05	1.31085e-05	1.15713e-05	1.26884e-05	1.29717e-05	1.15054e-05	1.25722e-05	1.31881e-05	1.38575e-05	1.31375e-05	1.51547e-05	1.33939e-05	1.15261e-05	1.15563e-05	1.13589e-05	1.25109e-05	1.28271e-05	1.33278e-05	1.2667e-05	1.1224e-05	1.37308e-05	1.12841e-05	1.4319e-05	1.32647e-05	1.11814e-05	1.18584e-05	1.21527e-05	1.14098e-05	1.21274e-05	1.10663e-05	9.55553e-06	9.64364e-06	1.17204e-05	1.07757e-05	1.23921e-05	1.33802e-05	1.21864e-05	1.34292e-05	1.24889e-05	1.19338e-05	1.09805e-05	1.20147e-05	1.20333e-05
Neuron_484	2.19303e-05	1.86517e-05	1.77573e-05	1.62316e-05	1.48396e-05	1.61053e-05	1.49944e-05	1.47299e-05	1.3823e-05	1.71256e-05	1.53783e-05	1.3083e-05	1.36575e-05	1.71562e-05	1.54384e-05	1.5211e-05	1.79804e-05	2.03889e-05	1.48297e-05	1.48673e-05	1.24968e-05	1.67791e-05	1.68021e-05	1.60798e-05	1.46863e-05	1.42994e-05	1.57185e-05	1.24892e-05	2.26192e-05	1.73503e-05	1.42642e-05	1.6001e-05	1.67536e-05	1.39414e-05	1.32595e-05	1.36276e-05	1.32225e-05	1.50024e-05	1.57069e-05	1.32003e-05	1.62862e-05	1.82558e-05	1.38202e-05	1.59961e-05	1.57142e-05	1.63292e-05	1.47269e-05	1.44253e-05	1.33531e-05
Neuron_485	2.73559e-05	2.08305e-05	1.72887e-05	1.41613e-05	1.40663e-05	1.43469e-05	1.53111e-05	1.61508e-05	1.49685e-05	1.79878e-05	1.61334e-05	1.53033e-05	1.29637e-05	1.71298e-05	1.50465e-05	1.61144e-05	1.81083e-05	2.39324e-05	1.55368e-05	1.57921e-05	1.44372e-05	1.90003e-05	1.9139e-05	1.86266e-05	1.59514e-05	1.34224e-05	1.53504e-05	1.34502e-05	3.45369e-05	1.78457e-05	1.32212e-05	1.5467e-05	1.95212e-05	1.22539e-05	1.4268e-05	1.21722e-05	1.30958e-05	1.32126e-05	1.23247e-05	1.34558e-05	1.37152e-05	1.67865e-05	1.45679e-05	1.52811e-05	1.73427e-05	1.4483e-05	1.37593e-05	1.43295e-05	1.38491e-05
Neuron_486	2.51599e-05	2.10806e-05	1.59668e-05	1.45068e-05	1.39621e-05	1.33087e-05	1.2997e-05	1.33148e-05	1.21504e-05	1.72906e-05	1.45184e-05	1.20542e-05	1.0247e-05	1.34465e-05	1.22865e-05	1.20576e-05	1.27918e-05	1.61203e-05	1.25262e-05	1.28821e-05	1.30979e-05	1.27139e-05	1.25043e-05	1.33032e-05	1.25422e-05	1.09247e-05	1.26093e-05	1.21565e-05	1.49666e-05	1.56395e-05	9.59917e-06	1.05659e-05	1.06311e-05	1.1866e-05	9.57766e-06	9.84348e-06	9.30408e-06	1.09127e-05	1.00841e-05	1.13814e-05	1.24587e-05	1.72813e-05	1.32554e-05	1.25628e-05	1.07804e-05	1.05528e-05	9.22546e-06	1.03528e-05	1.09215e-05
Neuron_487	1.95377e-05	1.60487e-05	1.3535e-05	1.20521e-05	1.20634e-05	1.03539e-05	1.07449e-05	1.05115e-05	1.124e-05	1.05114e-05	1.13589e-05	1.03224e-05	1.1441e-05	1.12824e-05	1.31268e-05	1.18374e-05	1.30835e-05	1.30327e-05	1.0762e-05	1.02725e-05	1.15239e-05	1.1287e-05	1.23895e-05	1.37622e-05	1.11248e-05	1.13886e-05	1.44157e-05	1.01964e-05	1.14598e-05	1.16721e-05	1.10846e-05	1.31597e-05	1.19864e-05	1.17827e-05	1.08762e-05	1.04732e-05	8.5001e-06	1.027e-05	1.1834e-05	9.5686e-06	1.42413e-05	1.35573e-05	1.09731e-05	1.39625e-05	1.25606e-05	1.01863e-05	9.42023e-06	1.09013e-05	1.08873e-05
Neuron_488	2.44677e-05	2.0563e-05	1.67607e-05	1.39976e-05	1.24477e-05	1.19771e-05	1.10685e-05	1.16799e-05	1.04976e-05	1.39819e-05	1.2608e-05	1.16012e-05	1.14841e-05	1.34895e-05	1.36162e-05	1.19919e-05	1.28851e-05	1.64175e-05	1.16246e-05	1.21685e-05	1.06914e-05	1.16583e-05	1.19533e-05	1.73575e-05	1.20829e-05	1.11792e-05	1.31773e-05	1.04849e-05	1.41446e-05	1.44457e-05	1.24815e-05	1.13646e-05	1.19421e-05	1.03008e-05	1.11602e-05	1.12006e-05	1.07238e-05	1.32477e-05	1.27419e-05	1.06885e-05	1.6202e-05	1.61082e-05	1.20948e-05	1.33052e-05	1.21018e-05	1.04899e-05	1.06431e-05	1.24599e-05	1.28418e-05
Neuron_489	1.50133e-05	1.26078e-05	1.05608e-05	8.36962e-06	8.11491e-06	7.58092e-06	7.54556e-06	8.61577e-06	6.20182e-06	1.09624e-05	7.8004e-06	8.11675e-06	7.09516e-06	1.05687e-05	8.1707e-06	7.28593e-06	9.5433e-06	1.1857e-05	7.88257e-06	7.80148e-06	8.6495e-06	9.43063e-06	9.0547e-06	1.17628e-05	9.46466e-06	7.10611e-06	8.80153e-06	8.05379e-06	1.26785e-05	7.5691e-06	7.35462e-06	7.49461e-06	7.40171e-06	7.06659e-06	7.19037e-06	7.72364e-06	7.08773e-06	8.45148e-06	7.38189e-06	7.09529e-06	9.1538e-06	1.00608e-05	8.45983e-06	7.72673e-06	1.09134e-05	6.91949e-06	6.98751e-06	8.9885e-06	8.57814e-06
Neuron_490	2.8392e-05	2.12953e-05	1.73578e-05	1.49414e-05	1.4343e-05	1.41759e-05	1.42749e-05	1.59075e-05	1.37604e-05	1.57083e-05	1.58656e-05	1.47067e-05	1.38623e-05	1.4602e-05	1.38135e-05	1.44161e-05	1.51048e-05	1.83291e-05	1.25603e-05	1.42065e-05	1.18962e-05	1.66645e-05	1.62809e-05	2.04498e-05	1.25545e-05	1.409e-05	1.28526e-05	1.25117e-05	1.97051e-05	1.53986e-05	1.27924e-05	1.32375e-05	1.32677e-05	1.13424e-05	1.22431e-05	1.14485e-05	1.05976e-05	1.38358e-05	1.23887e-05	1.23069e-05	1.37571e-05	1.45823e-05	1.25048e-05	1.22497e-05	1.32449e-05	1.21621e-05	1.18651e-05	1.18186e-05	1.2294e-05
Neuron_491	1.5975e-05	1.36163e-05	1.00787e-05	8.83862e-06	8.83384e-06	8.84822e-06	9.55179e-06	9.09317e-06	8.85949e-06	1.04898e-05	8.77858e-06	8.67174e-06	9.23269e-06	9.59387e-06	8.91714e-06	9.50027e-06	8.56195e-06	1.37073e-05	8.18846e-06	8.26353e-06	9.41864e-06	7.962e-06	9.48143e-06	1.07016e-05	9.91616e-06	8.80033e-06	1.14793e-05	9.31408e-06	1.18317e-05	9.63186e-06	9.07278e-06	9.80845e-06	9.55528e-06	8.28741e-06	9.87854e-06	9.18289e-06	7.88008e-06	8.40978e-06	8.67087e-06	8.91394e-06	1.05513e-05	1.0043e-05	8.98902e-06	9.01289e-06	9.50564e-06	8.58477e-06	8.22017e-06	8.92054e-06	9.12085e-06
Neuron_492	1.70655e-05	1.45668e-05	1.15862e-05	9.98337e-06	9.56974e-06	9.13374e-06	9.45144e-06	1.01242e-05	9.12915e-06	1.21744e-05	9.29547e-06	1.00182e-05	8.97073e-06	1.07842e-05	8.69712e-06	8.76767e-06	1.00688e-05	1.2418e-05	8.61718e-06	8.11371e-06	8.47516e-06	8.88576e-06	9.25125e-06	1.08715e-05	1.00542e-05	7.40474e-06	1.02247e-05	8.99609e-06	1.07986e-05	9.5071e-06	7.51945e-06	8.88538e-06	8.40122e-06	7.10973e-06	9.06137e-06	7.29255e-06	7.08784e-06	7.4224e-06	7.046e-06	7.86807e-06	9.99199e-06	1.06331e-05	9.09078e-06	9.06462e-06	9.31954e-06	7.26301e-06	7.63169e-06	8.40655e-06	8.56933e-06
Neuron_493	1.77357e-05	1.67605e-05	1.20707e-05	1.15454e-05	9.81879e-06	1.04755e-05	9.6306e-06	1.07822e-05	1.04295e-05	1.12633e-05	1.02228e-05	1.0256e-05	1.02265e-05	1.11537e-05	1.10537e-05	9.99025e-06	1.12589e-05	1.48171e-05	1.06193e-05	1.05643e-05	1.02272e-05	1.1161e-05	1.14796e-05	1.17562e-05	1.10324e-05	9.19476e-06	1.31333e-05	9.66829e-06	1.60592e-05	1.0578e-05	1.01782e-05	1.1697e-05	1.16753e-05	9.88114e-06	1.02309e-05	1.1049e-05	9.73866e-06	1.00566e-05	1.03947e-05	9.37559e-06	1.13215e-05	1.19144e-05	1.06831e-05	1.12504e-05	1.19064e-05	1.01014e-05	9.98075e-06	1.09753e-05	1.24394e-05
Neuron_494	2.27708e-05	2.04246e-05	1.20334e-05	1.11753e-05	1.00124e-05	1.09077e-05	9.99958e-06	1.21434e-05	1.07336e-05	1.34058e-05	1.03535e-05	1.04751e-05	8.4622e-06	1.00484e-05	9.36651e-06	1.07078e-05	1.03449e-05	1.34583e-05	8.14351e-06	9.11705e-06	1.04118e-05	1.0048e-05	1.05184e-05	1.05297e-05	1.08608e-05	9.14751e-06	1.15145e-05	1.03389e-05	1.55035e-05	1.33333e-05	9.74031e-06	1.06787e-05	1.13875e-05	1.01049e-05	9.52509e-06	1.09232e-05	9.40558e-06	9.31083e-06	9.57892e-06	1.08743e-05	1.05027e-05	1.29335e-05	1.12699e-05	1.13678e-05	1.06564e-05	1.00434e-05	9.38204e-06	1.03885e-05	1.09746e-05
Neuron_495	3.56001e-05	2.94092e-05	2.14923e-05	1.80242e-05	1.69212e-05	1.83527e-05	1.77533e-05	2.04974e-05	1.78214e-05	1.91967e-05	1.7516e-05	1.75661e-05	1.74456e-05	2.01981e-05	1.94858e-05	1.84423e-05	1.83863e-05	2.36397e-05	1.40636e-05	1.67315e-05	1.42953e-05	1.83595e-05	1.75074e-05	1.75108e-05	1.65474e-05	1.61913e-05	1.83808e-05	1.73306e-05	2.08346e-05	1.85408e-05	1.70454e-05	1.76708e-05	1.73187e-05	1.63628e-05	1.56085e-05	1.5447e-05	1.40745e-05	1.78555e-05	1.44573e-05	1.62699e-05	1.89276e-05	1.99866e-05	1.93625e-05	1.58217e-05	1.79084e-05	1.59988e-05	1.54467e-05	1.70304e-05	1.74672e-05
Neuron_496	1.35101e-05	1.26302e-05	9.7682e-06	9.4031e-06	8.15871e-06	8.43759e-06	8.74627e-06	9.51374e-06	8.97884e-06	9.61527e-06	7.94429e-06	7.87301e-06	8.22314e-06	8.59871e-06	8.52415e-06	9.40809e-06	1.08905e-05	1.25152e-05	8.33597e-06	8.30171e-06	8.92082e-06	1.02301e-05	1.0056e-05	9.99011e-06	8.38552e-06	8.35046e-06	1.0451e-05	8.2771e-06	1.1183e-05	8.06092e-06	8.21056e-06	8.99702e-06	8.93968e-06	8.37667e-06	8.35311e-06	7.52461e-06	6.28933e-06	7.57331e-06	7.99474e-06	7.86665e-06	8.73113e-06	9.20001e-06	7.97847e-06	9.35697e-06	8.85674e-06	7.8181e-06	8.11254e-06	8.23075e-06	9.61981e-06
Neuron_497	1.49666e-05	1.45082e-05	1.1702e-05	9.86616e-06	9.23846e-06	9.72812e-06	1.11017e-05	1.04304e-05	1.14067e-05	1.22751e-05	1.06894e-05	1.13698e-05	1.07603e-05	1.082e-05	1.2e-05	1.1916e-05	1.26929e-05	1.1521e-05	1.03058e-05	1.15673e-05	1.11833e-05	1.01436e-05	1.22297e-05	1.07413e-05	1.18733e-05	9.67049e-06	1.42042e-05	1.04889e-05	1.13453e-05	9.73522e-06	8.80405e-06	1.05049e-05	9.89513e-06	8.98001e-06	1.21943e-05	1.07684e-05	9.13802e-06	8.4854e-06	9.10535e-06	1.02009e-05	1.11331e-05	1.14597e-05	9.76222e-06	8.93276e-06	1.01982e-05	8.5389e-06	8.43032e-06	9.20913e-06	1.01151e-05
Neuron_498	1.40255e-05	1.27707e-05	1.04017e-05	9.54847e-06	8.46881e-06	9.14379e-06	8.56529e-06	9.0929e-06	8.59994e-06	9.2068e-06	8.7252e-06	7.93397e-06	9.36477e-06	1.05889e-05	1.09685e-05	9.70838e-06	9.80959e-06	1.17267e-05	9.59296e-06	9.39883e-06	7.85026e-06	9.09276e-06	9.11329e-06	9.42403e-06	8.3781e-06	9.111e-06	9.12361e-06	7.67536e-06	1.10346e-05	1.03701e-05	9.47493e-06	8.9805e-06	9.23454e-06	7.88149e-06	7.66236e-06	8.78775e-06	7.10902e-06	1.07672e-05	9.37805e-06	8.3794e-06	1.16304e-05	1.1097e-05	8.49813e-06	8.85749e-06	8.63141e-06	8.02803e-06	8.24448e-06	1.0289e-05	9.44299e-06
Neuron_499	1.16402e-05	8.12943e-06	6.07611e-06	7.26999e-06	6.69448e-06	7.15394e-06	6.15824e-06	7.30651e-06	6.18937e-06	8.41224e-06	7.58646e-06	7.60673e-06	5.6648e-06	7.75522e-06	8.11516e-06	7.47854e-06	7.12363e-06	9.54268e-06	7.42091e-06	7.03742e-06	7.41684e-06	9.52081e-06	1.11246e-05	9.61794e-06	8.03332e-06	6.81387e-06	7.24191e-06	7.43574e-06	1.00902e-05	7.28151e-06	6.18106e-06	7.02416e-06	7.64054e-06	8.22623e-06	8.71173e-06	7.5992e-06	7.24215e-06	6.6115e-06	6.63656e-06	7.36138e-06	7.62296e-06	9.6423e-06	7.38004e-06	7.39124e-06	8.26559e-06	6.77621e-06	6.04123e-06	5.91099e-06	6.57001e-06
Neuron_500	2.39454e-05	1.85916e-05	1.45229e-05	1.14792e-05	1.03872e-05	9.75909e-06	1.01924e-05	1.09631e-05	9.06876e-06	1.2913e-05	9.35353e-06	1.1166e-05	1.08586e-05	1.21105e-05	1.05077e-05	1.08645e-05	1.02231e-05	1.53714e-05	9.27107e-06	9.28227e-06	1.11206e-05	1.10631e-05	9.70835e-06	1.32879e-05	1.13362e-05	1.0818e-05	1.00463e-05	9.84488e-06	1.44554e-05	1.29547e-05	1.26414e-05	1.0539e-05	1.11549e-05	8.90827e-06	9.70702e-06	1.01964e-05	9.41548e-06	1.21823e-05	1.01222e-05	9.68429e-06	1.11644e-05	1.02728e-05	9.82336e-06	9.04121e-06	1.14803e-05	8.13562e-06	9.82361e-06	1.12646e-05	1.01589e-05
Neuron_501	2.22781e-05	1.83078e-05	1.28933e-05	1.17649e-05	1.13155e-05	1.20992e-05	1.12315e-05	1.33834e-05	1.12299e-05	1.30432e-05	1.14357e-05	1.08162e-05	1.1351e-05	1.09662e-05	1.0325e-05	1.08399e-05	1.17012e-05	1.4403e-05	9.58422e-06	1.07403e-05	1.05409e-05	1.19439e-05	1.31753e-05	1.23671e-05	1.20356e-05	1.17169e-05	1.30222e-05	1.20715e-05	1.46019e-05	1.36561e-05	1.04737e-05	1.38325e-05	1.24222e-05	9.94587e-06	1.05331e-05	1.12848e-05	8.70454e-06	1.08049e-05	9.42127e-06	1.11205e-05	1.35233e-05	1.41722e-05	1.15393e-05	1.13506e-05	1.22094e-05	9.42693e-06	9.45841e-06	1.03902e-05	1.14081e-05
Neuron_502	1.92409e-05	1.6546e-05	1.50524e-05	1.35309e-05	1.26667e-05	1.25603e-05	1.1785e-05	1.31587e-05	1.11102e-05	1.42058e-05	1.20174e-05	1.17044e-05	9.85046e-06	1.01328e-05	9.81268e-06	1.02426e-05	1.17484e-05	1.56639e-05	1.22396e-05	1.156e-05	1.21109e-05	1.4293e-05	1.43543e-05	1.50978e-05	1.26576e-05	1.13292e-05	1.30468e-05	1.07099e-05	1.83507e-05	1.37403e-05	1.13199e-05	1.35904e-05	1.33043e-05	1.02977e-05	1.17688e-05	1.20771e-05	1.00729e-05	1.14244e-05	1.01288e-05	1.21894e-05	1.39812e-05	1.73859e-05	1.21707e-05	1.2446e-05	1.48504e-05	1.19916e-05	1.13686e-05	1.28908e-05	1.22316e-05
Neuron_503	1.93136e-05	1.72278e-05	1.31192e-05	1.30943e-05	1.28345e-05	1.28607e-05	1.1281e-05	1.2098e-05	1.10609e-05	1.19136e-05	1.15657e-05	1.07812e-05	1.14108e-05	1.26023e-05	1.14906e-05	1.12852e-05	1.25969e-05	1.45229e-05	1.05452e-05	1.0393e-05	9.99236e-06	1.17371e-05	1.20579e-05	1.27646e-05	1.30832e-05	1.0688e-05	1.3041e-05	1.12932e-05	1.2675e-05	1.04944e-05	1.05911e-05	1.07815e-05	9.87247e-06	1.15035e-05	1.19876e-05	1.15036e-05	9.70991e-06	1.06552e-05	1.05786e-05	1.00319e-05	1.26603e-05	1.43708e-05	1.23721e-05	1.09382e-05	1.15367e-05	1.16042e-05	1.0797e-05	1.09346e-05	1.15273e-05
Neuron_504	1.66949e-05	1.28749e-05	1.14567e-05	8.91868e-06	9.36613e-06	8.18383e-06	8.49067e-06	8.97423e-06	7.7649e-06	1.03575e-05	7.61735e-06	8.83612e-06	9.69697e-06	1.14367e-05	8.85129e-06	7.68013e-06	8.76772e-06	1.29817e-05	7.44605e-06	7.64992e-06	8.01591e-06	8.04709e-06	7.98458e-06	8.64654e-06	9.00178e-06	7.62709e-06	8.92882e-06	8.15798e-06	1.00797e-05	8.79494e-06	8.54878e-06	9.96563e-06	9.30314e-06	6.79475e-06	8.25021e-06	7.39256e-06	7.78487e-06	9.51871e-06	7.5459e-06	6.9918e-06	9.25852e-06	7.22655e-06	8.59734e-06	7.77271e-06	9.05588e-06	5.98767e-06	7.01922e-06	8.08908e-06	8.77211e-06
Neuron_505	1.21199e-05	1.14842e-05	1.01829e-05	8.15802e-06	8.47888e-06	9.61363e-06	1.00715e-05	9.03609e-06	8.85307e-06	1.08482e-05	9.52265e-06	8.75165e-06	7.3204e-06	1.0529e-05	9.07423e-06	8.94739e-06	1.02668e-05	1.4386e-05	1.00091e-05	1.18019e-05	9.1529e-06	1.10004e-05	1.00361e-05	9.17143e-06	9.07958e-06	8.21799e-06	9.57481e-06	6.90197e-06	1.13872e-05	9.10848e-06	7.94026e-06	8.5222e-06	8.97284e-06	8.91057e-06	7.70941e-06	7.36974e-06	8.11547e-06	8.5365e-06	8.08017e-06	9.57e-06	1.05585e-05	1.21216e-05	9.67027e-06	9.57593e-06	7.94004e-06	7.36396e-06	7.09233e-06	8.11034e-06	7.83148e-06
Neuron_506	1.30221e-05	1.07573e-05	9.38807e-06	8.6313e-06	7.975e-06	9.01017e-06	7.77181e-06	8.31886e-06	7.17577e-06	8.58916e-06	7.81761e-06	7.7957e-06	8.03363e-06	7.95078e-06	9.18317e-06	9.46479e-06	1.05703e-05	1.59873e-05	9.64901e-06	1.02634e-05	8.41133e-06	1.00926e-05	9.83256e-06	9.51141e-06	8.83187e-06	7.82276e-06	9.62967e-06	7.58997e-06	1.19413e-05	1.05637e-05	9.22669e-06	1.02486e-05	8.99349e-06	7.93321e-06	8.55024e-06	8.33531e-06	7.32861e-06	8.2688e-06	8.92958e-06	9.04697e-06	1.04689e-05	1.16114e-05	8.77871e-06	9.85007e-06	1.0648e-05	9.15994e-06	8.18515e-06	8.88671e-06	8.37012e-06
Neuron_507	2.22839e-05	2.14465e-05	1.63438e-05	1.35812e-05	1.16708e-05	1.1219e-05	1.11709e-05	1.29887e-05	1.01705e-05	1.50312e-05	1.18115e-05	1.14039e-05	1.09583e-05	1.25353e-05	1.15259e-05	1.06608e-05	1.18453e-05	1.71249e-05	1.14025e-05	1.11137e-05	1.30344e-05	1.12127e-05	1.13928e-05	1.37934e-05	1.31709e-05	1.08077e-05	1.29358e-05	1.1237e-05	1.38833e-05	1.17302e-05	1.12724e-05	1.16239e-05	1.04141e-05	9.61626e-06	1.02357e-05	9.62916e-06	8.72658e-06	1.06777e-05	9.91917e-06	9.65935e-06	1.23681e-05	1.51235e-05	1.15969e-05	1.16164e-05	1.09065e-05	9.52521e-06	9.25558e-06	1.0875e-05	1.17584e-05
Neuron_508	3.15668e-05	1.90837e-05	1.55683e-05	1.61264e-05	1.70815e-05	1.57054e-05	1.50003e-05	1.5352e-05	1.19427e-05	1.59308e-05	1.41925e-05	1.53944e-05	1.59934e-05	1.76158e-05	1.80928e-05	1.55636e-05	1.68348e-05	2.19529e-05	1.47213e-05	1.3794e-05	1.3552e-05	1.40871e-05	1.66456e-05	2.34387e-05	1.74948e-05	1.35286e-05	1.55967e-05	1.40153e-05	1.5561e-05	1.62134e-05	1.56474e-05	1.74622e-05	1.63369e-05	1.41183e-05	1.72541e-05	1.46309e-05	1.45129e-05	1.66871e-05	1.58948e-05	1.44684e-05	2.00501e-05	1.54249e-05	1.37837e-05	1.45512e-05	1.89921e-05	1.43525e-05	1.41264e-05	1.51964e-05	1.59034e-05
Neuron_509	2.72051e-05	2.11235e-05	1.73427e-05	1.43842e-05	1.532e-05	1.40665e-05	1.43394e-05	1.48166e-05	1.31505e-05	1.6859e-05	1.34012e-05	1.32606e-05	1.20497e-05	1.46327e-05	1.24921e-05	1.30042e-05	1.65835e-05	1.96248e-05	1.18055e-05	1.27871e-05	1.22689e-05	1.57713e-05	1.65229e-05	1.67452e-05	1.50091e-05	1.1752e-05	1.64184e-05	1.26749e-05	2.0829e-05	1.5477e-05	1.26896e-05	1.50292e-05	1.60317e-05	1.10714e-05	1.3169e-05	1.16576e-05	1.17153e-05	1.15995e-05	1.23373e-05	1.31082e-05	1.4203e-05	1.49682e-05	1.34921e-05	1.43141e-05	1.66779e-05	1.15704e-05	1.28426e-05	1.36479e-05	1.3645e-05
Neuron_510	2.7609e-05	2.0539e-05	1.8467e-05	1.48147e-05	1.4591e-05	1.53022e-05	1.53594e-05	1.64511e-05	1.45337e-05	1.89607e-05	1.67029e-05	1.60299e-05	1.40625e-05	1.58583e-05	1.44368e-05	1.45625e-05	1.58337e-05	1.77092e-05	1.28944e-05	1.40117e-05	1.28391e-05	1.71129e-05	1.59085e-05	1.86274e-05	1.50387e-05	1.27362e-05	1.48794e-05	1.3221e-05	2.01461e-05	1.63275e-05	1.27797e-05	1.35195e-05	1.3923e-05	1.27232e-05	1.35957e-05	1.32088e-05	1.25062e-05	1.32394e-05	1.17742e-05	1.23633e-05	1.36803e-05	1.61367e-05	1.32023e-05	1.27476e-05	1.48091e-05	1.33415e-05	1.29758e-05	1.26845e-05	1.3687e-05
Neuron_511	2.25349e-05	2.02165e-05	1.66666e-05	1.34099e-05	1.30502e-05	1.23263e-05	1.41213e-05	1.42247e-05	1.30108e-05	1.41547e-05	1.34183e-05	1.33249e-05	1.32551e-05	1.46972e-05	1.39585e-05	1.42225e-05	1.59733e-05	1.54937e-05	1.18087e-05	1.21533e-05	1.15115e-05	1.31791e-05	1.42713e-05	1.37692e-05	1.23729e-05	1.22792e-05	1.49374e-05	1.15373e-05	1.80391e-05	1.19804e-05	1.06721e-05	1.17666e-05	1.3031e-05	1.12699e-05	1.22309e-05	1.19288e-05	1.06322e-05	1.14743e-05	1.18364e-05	1.18489e-05	1.28513e-05	1.19978e-05	1.10337e-05	1.08185e-05	1.21158e-05	1.05636e-05	9.90248e-06	1.02681e-05	1.13577e-05
Neuron_512	0.000199868	0.000178009	0.00015851	0.000144371	0.00014262	0.000146094	0.00013854	0.000139031	0.000126291	0.00014372	0.000132731	0.000127424	0.000131616	0.000150567	0.000139751	0.000138418	0.000149045	0.000157009	0.000123577	0.000122212	0.000118519	0.000148438	0.000132065	0.0001352	0.000127959	0.000126467	0.000132058	0.000113008	0.000161273	0.000146518	0.000124728	0.000139985	0.000131694	0.000128813	0.000116027	0.000133513	0.000109154	0.000131724	0.000135206	0.000132219	0.00015447	0.000163811	0.000138068	0.000138938	0.00013348	0.00014876	0.000135547	0.00012624	0.000115984
Neuron_513	0.000232165	0.000179136	0.000148536	0.000134551	0.000117497	0.000115256	0.000119689	0.000128416	0.000114681	0.000135911	0.000120224	0.000120009	0.000125521	0.000139833	0.000139952	0.000130307	0.000149375	0.000173693	0.00011651	0.000121125	0.000106835	0.000141779	0.00014217	0.000145306	0.00011792	0.00011445	0.000146807	0.000117566	0.000206652	0.000158853	0.000137489	0.000146488	0.000159871	0.000119516	0.000129732	0.000117085	0.000113496	0.000113126	0.00012545	0.000110595	0.000128062	0.000141223	0.00011948	0.000136013	0.000139624	0.00011345	0.000121014	0.000129254	0.000122971
Neuron_514	0.000264507	0.00020672	0.000165847	0.000141792	0.000134445	0.000132669	0.000137691	0.000141013	0.000146691	0.000163145	0.000131777	0.000134652	0.000118243	0.000138783	0.000126053	0.000138307	0.000161244	0.000185821	0.000121516	0.000113793	0.000125476	0.000148932	0.000143478	0.000137575	0.000128557	0.000116385	0.000165725	0.000126917	0.000271837	0.00013723	0.000124575	0.000142959	0.000157572	0.00012033	0.00013209	0.000122065	0.000113462	0.000107953	0.000120616	0.000118139	0.000125892	0.000153548	0.000122621	0.000150302	0.000139424	0.000127119	0.000121424	0.000119777	0.000127344
Neuron_515	0.000218516	0.000196139	0.000126623	0.000125178	0.0001085	0.000110413	0.000102548	0.000122779	0.000116028	0.000124036	0.000113191	0.00010495	0.000123507	0.000119632	0.000114747	0.000119477	0.00011155	0.000137889	9.16988e-05	0.000108154	0.000120657	0.000112405	0.000123859	0.000132007	0.000116406	0.000130063	0.000148198	0.000127089	0.000141534	0.000132936	0.000122623	0.000139956	0.000124649	0.000109848	0.000104833	0.000112544	8.36315e-05	0.00011177	0.000104326	0.000109729	0.000121965	0.000123297	0.000100319	0.000114438	0.000108039	9.1874e-05	9.57784e-05	0.000107325	0.000114073
Neuron_516	0.000166084	0.000148781	0.000116576	0.000114133	0.000117425	0.000112278	0.000106264	0.00011448	9.70315e-05	0.000117904	0.000111857	0.000103224	0.000109282	0.000112192	0.000105482	0.00010598	0.000114702	0.000116643	8.894e-05	9.24521e-05	8.77036e-05	0.000106251	0.000110708	0.000112045	0.000110975	0.000105893	0.000118107	9.81253e-05	0.000113585	0.000110349	8.85702e-05	9.95874e-05	9.31642e-05	0.000103517	0.000105048	0.000106933	8.36733e-05	9.06671e-05	9.47391e-05	9.30851e-05	0.000101926	0.000113011	0.000100723	9.33038e-05	9.44422e-05	9.65067e-05	8.79115e-05	8.95475e-05	9.64846e-05
Neuron_517	0.000168059	0.000116809	8.16954e-05	7.18075e-05	6.39783e-05	5.65382e-05	6.41602e-05	7.06943e-05	6.28057e-05	8.56851e-05	6.90731e-05	7.82713e-05	7.39404e-05	8.35325e-05	7.24782e-05	6.48734e-05	7.00786e-05	0.000124902	5.94754e-05	6.08095e-05	6.34809e-05	6.64705e-05	7.67655e-05	0.000128241	7.02429e-05	5.62704e-05	8.17098e-05	6.3419e-05	0.000101853	8.48272e-05	7.35828e-05	8.40052e-05	8.91366e-05	6.41592e-05	7.94983e-05	6.53266e-05	7.10167e-05	7.83253e-05	7.34891e-05	6.18812e-05	0.000116361	6.71491e-05	6.34824e-05	7.16733e-05	8.45522e-05	5.17076e-05	6.24243e-05	7.26801e-05	7.63326e-05
Neuron_518	0.000119134	0.00011455	8.13126e-05	7.67982e-05	6.52448e-05	7.41076e-05	6.17444e-05	8.20079e-05	7.44114e-05	7.6278e-05	7.08657e-05	7.39758e-05	7.02643e-05	7.54874e-05	7.70653e-05	6.97807e-05	7.57356e-05	0.000103654	6.48505e-05	6.68759e-05	6.52074e-05	7.54342e-05	9.23983e-05	8.09949e-05	8.80189e-05	7.45515e-05	9.56301e-05	7.85536e-05	8.41841e-05	6.73749e-05	7.01961e-05	8.59836e-05	7.18848e-05	5.89885e-05	7.37885e-05	7.5334e-05	6.34941e-05	7.51076e-05	6.72448e-05	7.17281e-05	8.22499e-05	9.30807e-05	7.43319e-05	7.39646e-05	8.49112e-05	7.23761e-05	6.78661e-05	7.42819e-05	7.61898e-05
Neuron_519	0.00026128	0.000204307	0.000163508	0.000129742	0.000120787	0.000123161	0.000131632	0.000132457	0.000105532	0.000154365	0.000131209	0.000125125	0.000108585	0.000134448	0.000122957	0.000122898	0.0001134	0.00015924	0.000105647	0.000122126	0.000105894	0.000120603	0.00012871	0.000135269	0.000116679	0.00010719	0.000112581	0.00010502	0.000142842	0.000122114	0.00010399	0.000114109	0.000123917	0.000110868	0.000105768	0.000102371	9.59667e-05	0.000102881	0.000105702	0.000110802	0.000120136	0.000133934	0.000117927	0.000105075	0.000114222	9.76649e-05	9.09545e-05	0.000102985	0.000101872
Neuron_520	0.000138033	0.000103923	8.78728e-05	6.79899e-05	6.98584e-05	6.42805e-05	7.03536e-05	7.77329e-05	7.28252e-05	9.13329e-05	7.11289e-05	7.73571e-05	7.93621e-05	8.48771e-05	7.35408e-05	6.95336e-05	8.84602e-05	0.000118612	5.6604e-05	6.7106e-05	6.91292e-05	8.15717e-05	9.02912e-05	9.74814e-05	8.02801e-05	7.74572e-05	9.11452e-05	7.57051e-05	0.000152682	8.99837e-05	7.86292e-05	0.00010258	9.0894e-05	5.22426e-05	7.24406e-05	6.07915e-05	5.9328e-05	6.84016e-05	5.74459e-05	6.14078e-05	7.57873e-05	8.45335e-05	7.03222e-05	7.62992e-05	9.18133e-05	6.18853e-05	7.06799e-05	7.78155e-05	8.4179e-05
Neuron_521	0.000198825	0.000147511	0.000114542	0.000120762	0.000118871	0.000112976	0.000100428	0.000114649	9.29769e-05	0.000111332	9.26106e-05	8.91198e-05	0.000112502	0.000121365	0.000114682	0.000102536	0.00011306	0.000139412	0.000106578	0.000108158	0.000103007	0.000112624	0.000131445	0.000124294	0.000118969	0.000101015	0.000122647	0.000101102	0.000158657	0.000109253	0.000107668	0.000132825	0.000121386	9.08958e-05	0.000103327	0.00010042	9.10528e-05	0.000110368	9.05321e-05	9.62938e-05	0.000121375	0.000116317	9.13704e-05	0.000101068	0.000132462	0.000100383	0.000100724	0.000111473	0.000107285
Neuron_522	0.000186855	0.000160032	0.000123125	0.000123194	0.000112023	0.00010913	0.000108088	0.00011466	0.000100506	0.00013368	0.000114134	9.49557e-05	0.000103723	0.000107365	0.000111059	0.000100388	0.000116271	0.000146852	9.56774e-05	9.86258e-05	9.94912e-05	9.72125e-05	0.000101808	0.000108846	0.000110711	9.41455e-05	0.000114869	0.000106478	0.000123685	0.000111062	9.38108e-05	0.000109531	0.000100512	9.81099e-05	9.97525e-05	0.000102036	8.89884e-05	8.93821e-05	9.33612e-05	9.16984e-05	0.000111768	0.000133477	0.000117037	0.00011491	0.000102911	0.000100943	9.44425e-05	0.000102013	0.000112544
Neuron_523	0.000167849	0.000144383	0.000120715	9.93534e-05	9.49907e-05	9.61973e-05	0.00010869	0.000103596	9.99957e-05	9.99753e-05	9.88509e-05	9.38726e-05	0.000104594	0.000107451	0.000111705	9.93331e-05	0.000113044	0.000135785	9.76669e-05	9.77526e-05	8.9755e-05	9.55179e-05	0.000102407	0.000100089	0.000101658	9.76103e-05	0.000114009	9.44486e-05	0.000116637	9.98236e-05	9.49107e-05	9.97136e-05	9.97641e-05	8.92146e-05	9.29301e-05	9.41547e-05	8.28469e-05	9.27731e-05	9.67455e-05	8.3756e-05	0.000109805	0.000102073	8.9325e-05	8.82361e-05	9.10572e-05	8.08039e-05	7.88511e-05	8.79154e-05	9.15194e-05
Neuron_524	0.000168715	0.000135085	0.000106976	9.95606e-05	9.30939e-05	9.0794e-05	9.281e-05	9.56452e-05	8.4873e-05	0.000107892	9.27378e-05	8.85663e-05	8.50213e-05	9.49885e-05	9.08157e-05	8.96483e-05	9.45636e-05	0.000137274	8.74313e-05	8.32862e-05	8.58147e-05	8.82324e-05	9.51939e-05	0.000110399	0.000101015	8.15778e-05	0.000100851	8.75061e-05	0.000117275	0.000102509	9.32374e-05	0.00010513	0.000102328	9.13603e-05	9.72742e-05	8.81234e-05	8.33489e-05	8.00587e-05	8.82278e-05	8.45661e-05	9.99722e-05	0.000101648	9.72598e-05	9.77051e-05	9.46831e-05	9.09525e-05	8.04802e-05	8.4092e-05	8.62327e-05
Neuron_525	0.000253221	0.000218602	0.00016217	0.000152795	0.000126045	0.000157506	0.000136918	0.000151425	0.000148462	0.000163506	0.000144104	0.000136596	0.000136385	0.000161687	0.000160437	0.000153225	0.000145134	0.000223075	0.000123898	0.000139515	0.000136677	0.000152646	0.000168768	0.00014815	0.000141699	0.000152636	0.00016169	0.00014062	0.000155488	0.000178811	0.000142642	0.000150678	0.000131399	0.000136772	0.00011732	0.000131219	0.000115522	0.000143063	0.000142968	0.000124272	0.000152493	0.000172461	0.000135609	0.000157341	0.000143316	0.00013433	0.00012116	0.00013263	0.000137933
Neuron_526	0.000152058	0.000116539	9.9017e-05	9.28153e-05	8.51416e-05	9.88042e-05	8.51087e-05	9.24019e-05	9.51489e-05	0.000109529	9.91366e-05	9.3179e-05	8.05296e-05	9.58759e-05	8.40081e-05	8.65483e-05	9.53132e-05	0.000152908	8.11682e-05	8.2695e-05	7.55818e-05	0.000100885	0.000108193	0.000106035	8.52591e-05	7.93717e-05	8.44633e-05	6.5745e-05	0.000149929	0.000100188	7.70095e-05	8.44475e-05	8.8625e-05	6.90423e-05	8.05551e-05	6.97617e-05	7.55259e-05	9.07056e-05	7.71256e-05	7.44394e-05	8.65285e-05	0.000100895	7.91496e-05	8.69457e-05	8.93183e-05	8.43047e-05	7.87058e-05	7.68443e-05	7.51154e-05
Neuron_527	0.00010457	9.75554e-05	7.86166e-05	6.96e-05	6.56529e-05	7.0397e-05	6.22305e-05	7.54731e-05	6.47889e-05	7.36134e-05	6.75111e-05	6.05208e-05	6.02089e-05	6.44694e-05	6.65969e-05	6.40488e-05	7.00248e-05	9.41418e-05	6.42364e-05	6.45618e-05	6.27614e-05	7.52129e-05	8.50117e-05	7.17911e-05	6.77135e-05	6.23778e-05	7.12459e-05	5.59446e-05	8.24684e-05	6.5092e-05	5.54295e-05	8.23896e-05	7.17077e-05	5.37796e-05	5.61012e-05	6.11453e-05	5.32797e-05	6.36287e-05	5.94596e-05	6.11607e-05	7.0527e-05	7.33163e-05	6.45509e-05	7.21722e-05	7.26778e-05	7.06228e-05	6.39222e-05	6.02345e-05	6.63251e-05
Neuron_528	0.000226954	0.000148778	0.000123696	0.000120348	0.000110532	0.000106823	9.83055e-05	0.000116458	0.000104822	0.000125465	0.000106656	0.000110814	0.000112662	0.000121776	0.00011946	0.000117398	0.000132217	0.000176834	0.000106188	9.73869e-05	0.000106641	0.000133367	0.000135916	0.000141082	0.000118878	0.000102628	0.000119828	0.000102588	0.000192213	0.000116705	0.000112283	0.000112938	0.000116508	0.000109452	0.000116015	9.807e-05	9.40323e-05	0.000100777	0.000101702	0.000102252	0.000106418	0.000123327	0.000106171	0.000125257	0.000137841	0.00010533	0.000105776	0.000114387	0.000113652
Neuron_529	0.00014241	0.000145445	0.00012487	0.000103222	0.000100101	0.00010528	9.85485e-05	0.000107577	0.000102458	0.000117124	0.000106458	0.000100262	9.86027e-05	0.00010429	0.000111951	0.000112025	0.000117077	0.000138903	0.000109873	0.000100168	0.000106363	0.00012089	0.000134297	0.000118265	0.000118803	0.000102754	0.000129076	9.32135e-05	0.000120223	0.00011257	9.88222e-05	0.000107366	0.000103187	8.65704e-05	0.000102927	9.56449e-05	8.44211e-05	0.000101288	0.00010343	9.04105e-05	0.000107163	0.00010737	8.59963e-05	0.000103756	0.000109265	9.59004e-05	9.12856e-05	9.99709e-05	9.75815e-05
Neuron_530	0.000157622	0.000133091	0.000109973	0.000106895	0.000106115	0.000102641	0.000101965	0.000102607	8.98404e-05	0.000115369	9.9085e-05	9.26081e-05	9.17787e-05	9.5154e-05	8.52313e-05	8.69748e-05	0.000105381	0.000143757	8.72179e-05	8.90311e-05	9.28322e-05	0.000104584	9.9524e-05	0.000103721	0.000102878	8.91432e-05	0.000103579	9.37029e-05	0.000120014	0.000104928	9.2797e-05	0.000122438	0.000105491	8.8398e-05	9.16499e-05	9.36056e-05	8.27295e-05	8.86268e-05	8.29448e-05	8.90631e-05	9.89694e-05	0.000101915	0.00010297	0.00010039	9.48697e-05	9.42063e-05	8.74168e-05	8.63086e-05	9.69343e-05
Neuron_531	9.27589e-05	7.37594e-05	5.44027e-05	5.15077e-05	4.73368e-05	4.47e-05	4.24056e-05	4.66505e-05	5.01395e-05	4.27977e-05	4.49888e-05	4.04778e-05	4.68342e-05	4.30702e-05	4.98273e-05	4.77855e-05	5.21303e-05	8.8224e-05	4.6887e-05	4.24698e-05	4.52896e-05	4.78189e-05	5.41604e-05	6.38621e-05	4.39599e-05	4.39671e-05	4.86813e-05	4.31522e-05	6.69392e-05	5.85543e-05	5.24579e-05	5.147e-05	4.98251e-05	4.38666e-05	4.87734e-05	3.996e-05	3.457e-05	4.64466e-05	4.82134e-05	3.83961e-05	6.27281e-05	4.8004e-05	4.35609e-05	4.88639e-05	4.33837e-05	3.81362e-05	3.52106e-05	4.27236e-05	4.49956e-05
Neuron_532	0.000184677	0.00014694	0.000108982	8.64007e-05	8.47736e-05	8.98836e-05	8.96613e-05	9.69371e-05	8.57789e-05	0.000100379	8.49999e-05	8.46965e-05	6.88758e-05	9.04528e-05	8.78975e-05	9.26767e-05	9.68391e-05	0.00010808	8.24584e-05	9.21521e-05	8.19587e-05	0.000106717	0.000113689	0.000106655	9.44092e-05	8.19666e-05	0.000103786	9.20916e-05	0.000131374	8.85369e-05	7.64546e-05	9.22726e-05	9.2544e-05	6.82836e-05	7.40099e-05	7.68431e-05	7.49505e-05	7.12891e-05	7.34147e-05	7.90306e-05	8.06575e-05	0.000101107	8.1815e-05	9.29334e-05	0.000105949	8.32637e-05	7.79886e-05	8.46646e-05	8.44931e-05
Neuron_533	9.17646e-05	8.32331e-05	6.53816e-05	5.8364e-05	5.80836e-05	5.36736e-05	5.52163e-05	5.79851e-05	5.36155e-05	5.34935e-05	5.80205e-05	5.12098e-05	6.0611e-05	5.71723e-05	5.73536e-05	5.79324e-05	6.78685e-05	7.05453e-05	5.37411e-05	5.17101e-05	4.86351e-05	6.32261e-05	6.41796e-05	6.85354e-05	5.97831e-05	5.64261e-05	5.98182e-05	5.26264e-05	7.51811e-05	6.46262e-05	5.93488e-05	6.21122e-05	5.41846e-05	5.23506e-05	5.47103e-05	5.09299e-05	4.04655e-05	5.12005e-05	5.40335e-05	4.64262e-05	6.06075e-05	5.99449e-05	5.33505e-05	5.59532e-05	5.4599e-05	5.3016e-05	5.0258e-05	5.16726e-05	5.11956e-05
Neuron_534	0.000283138	0.000266157	0.000217746	0.00016393	0.000150312	0.000158695	0.000181843	0.000174318	0.000162221	0.000185445	0.000159524	0.000176914	0.000170988	0.000170961	0.000179682	0.000177643	0.000181575	0.000224053	0.000157673	0.000162082	0.000170234	0.000160984	0.000175287	0.000162271	0.000187247	0.000172644	0.000214308	0.000173961	0.000201309	0.000171979	0.000163515	0.000164914	0.000163696	0.000138051	0.000159964	0.000154519	0.000133062	0.000149994	0.000163301	0.000166747	0.000175027	0.000188931	0.000156796	0.000151951	0.00016799	0.000138233	0.000145752	0.000158944	0.000166492
Neuron_535	0.00013487	0.000117993	8.38156e-05	7.73534e-05	6.85456e-05	6.77112e-05	6.47583e-05	7.97094e-05	7.0343e-05	7.90304e-05	6.7226e-05	7.70194e-05	6.98295e-05	8.00198e-05	7.12917e-05	7.20676e-05	8.12481e-05	0.00010183	5.80614e-05	6.71161e-05	6.77885e-05	8.07698e-05	8.17399e-05	7.78405e-05	7.06656e-05	6.6926e-05	8.18281e-05	6.94873e-05	0.000128799	8.93716e-05	7.67835e-05	7.60431e-05	7.85233e-05	6.62857e-05	5.98206e-05	7.05802e-05	6.13942e-05	6.95198e-05	7.27676e-05	6.72565e-05	8.28211e-05	8.17421e-05	7.4942e-05	7.95152e-05	7.93995e-05	7.21179e-05	6.67837e-05	7.08783e-05	7.67209e-05
Neuron_536	0.000121874	0.00010435	8.15386e-05	7.79916e-05	7.84515e-05	7.41165e-05	7.46595e-05	8.06938e-05	6.76031e-05	7.96179e-05	7.37731e-05	7.68013e-05	7.05266e-05	6.7027e-05	6.65583e-05	6.90183e-05	7.59e-05	9.28182e-05	6.20205e-05	6.49901e-05	6.78354e-05	8.05461e-05	7.97196e-05	9.48526e-05	8.2259e-05	6.90519e-05	8.57228e-05	6.71492e-05	8.09972e-05	8.00884e-05	6.52813e-05	8.43051e-05	7.01549e-05	5.96856e-05	6.91192e-05	6.58989e-05	5.81534e-05	6.97238e-05	6.23226e-05	7.25966e-05	7.99993e-05	8.22856e-05	7.93186e-05	7.34229e-05	7.38792e-05	6.49728e-05	6.63672e-05	6.26522e-05	6.95017e-05
Neuron_537	0.000115702	0.00010786	8.45166e-05	9.02387e-05	8.04589e-05	7.98007e-05	7.10771e-05	7.41688e-05	6.51158e-05	7.86448e-05	7.13089e-05	6.71453e-05	6.96845e-05	7.99707e-05	7.67821e-05	7.11068e-05	8.38882e-05	0.000102029	7.57187e-05	7.54393e-05	6.95532e-05	7.9985e-05	7.69349e-05	7.71174e-05	7.46384e-05	7.16583e-05	7.52026e-05	6.57932e-05	9.04572e-05	7.11301e-05	6.20628e-05	6.79526e-05	6.46396e-05	7.09966e-05	6.67327e-05	7.17197e-05	5.98459e-05	6.41854e-05	6.49769e-05	6.05071e-05	8.14466e-05	9.38439e-05	7.27485e-05	7.50319e-05	7.09546e-05	7.58977e-05	7.05762e-05	7.00582e-05	7.30368e-05
Neuron_538	0.000187519	0.000173242	0.000145513	0.000132424	0.000126506	0.000128514	0.000123988	0.000133405	0.000123199	0.000136087	0.000117082	0.0001207	0.000121999	0.000140251	0.000126236	0.000120782	0.000124076	0.000156502	0.000112299	0.000116743	0.00012069	0.000128922	0.00013415	0.00013092	0.000126781	0.000116667	0.000139404	0.000110153	0.000146218	0.00014305	0.000114314	0.000135006	0.000120024	0.000112332	9.93249e-05	0.000114353	0.000106562	0.000117449	0.000120161	0.000122064	0.000138928	0.000139497	0.000125651	0.000135971	0.000124978	0.000122738	0.000108629	0.000111884	0.000121581
Neuron_539	0.000166851	0.000127978	9.70193e-05	9.82296e-05	8.88318e-05	9.44139e-05	8.77214e-05	9.92142e-05	7.59053e-05	9.74147e-05	9.26695e-05	8.68743e-05	8.90274e-05	9.75524e-05	0.000106141	0.000101655	9.06815e-05	0.00012269	8.29908e-05	8.76621e-05	8.7048e-05	8.72311e-05	0.000103578	0.000106907	9.716e-05	9.87839e-05	0.000106986	9.26791e-05	0.000126415	0.000111921	9.7688e-05	0.00010821	9.12683e-05	0.000100127	9.21713e-05	8.85288e-05	7.79036e-05	8.65083e-05	9.26027e-05	9.38292e-05	0.00010756	0.000127526	0.000100076	9.63417e-05	0.000107145	9.55806e-05	8.81177e-05	9.16137e-05	9.13844e-05
Neuron_540	0.000145458	0.00010742	8.78274e-05	7.64363e-05	7.77305e-05	7.79862e-05	7.6581e-05	8.17869e-05	7.18693e-05	7.92265e-05	7.17979e-05	7.48467e-05	7.62902e-05	8.73256e-05	8.19259e-05	7.60152e-05	7.49032e-05	0.000102879	7.37613e-05	7.65507e-05	6.89127e-05	7.2594e-05	8.29258e-05	8.46561e-05	8.63946e-05	7.27931e-05	9.13168e-05	7.84954e-05	9.85784e-05	8.35199e-05	7.80037e-05	8.67958e-05	8.17017e-05	6.19177e-05	7.20303e-05	6.44971e-05	6.36938e-05	8.03445e-05	7.21859e-05	6.95708e-05	0.000101897	8.21153e-05	7.86804e-05	6.47306e-05	7.7398e-05	6.49856e-05	6.17388e-05	7.09824e-05	6.9146e-05
Neuron_541	0.000148196	0.000128385	0.000105813	9.5489e-05	9.17396e-05	8.31839e-05	8.93437e-05	9.50261e-05	8.89168e-05	8.96741e-05	9.35934e-05	8.52135e-05	9.54327e-05	9.92523e-05	0.000104086	0.000100355	0.000113411	9.57715e-05	9.02901e-05	8.22838e-05	9.01694e-05	9.31549e-05	0.00010194	0.000107903	9.86199e-05	9.35038e-05	0.000111798	8.65809e-05	9.95769e-05	9.42515e-05	8.60414e-05	9.36631e-05	9.50875e-05	8.86681e-05	8.58908e-05	8.24604e-05	7.23033e-05	8.45636e-05	9.03886e-05	7.91202e-05	9.8049e-05	9.25198e-05	8.76834e-05	9.53448e-05	8.89965e-05	8.1612e-05	7.58197e-05	8.52205e-05	8.58264e-05
Neuron_542	0.000228328	0.00019634	0.00017363	0.000156713	0.00015236	0.000164556	0.000149117	0.00016492	0.000145444	0.000164032	0.000149435	0.000143358	0.000132687	0.000134487	0.000140107	0.000148795	0.000189746	0.00026009	0.000141357	0.000130211	0.000136581	0.000158663	0.000159699	0.000161123	0.000168116	0.000149029	0.000174112	0.000131652	0.000243006	0.000182665	0.000148722	0.000172092	0.000145041	0.000138214	0.000155664	0.000146377	0.000120132	0.000150924	0.000146505	0.000145705	0.000167409	0.000214918	0.000167332	0.00014711	0.000171043	0.000158829	0.000148766	0.000146053	0.000144792
Neuron_543	0.000201498	0.000180898	0.000118635	0.000127515	0.000117502	0.000108614	0.000100849	0.00011613	9.87929e-05	0.000119143	0.00010302	9.32786e-05	0.000109207	0.000109498	0.000103846	0.000108061	0.000109338	0.000164541	9.0822e-05	9.86342e-05	0.000110998	0.000105761	9.37137e-05	0.000109858	9.99461e-05	9.99683e-05	0.000114708	0.000108068	0.000149773	0.000129	0.000106568	0.000121977	0.000101955	0.000109689	9.30742e-05	0.000111106	8.31098e-05	0.000106116	0.000103399	0.000112626	0.000120016	0.000133383	0.00012071	0.000119534	9.37639e-05	0.000105893	0.000105634	0.000110963	0.000121645
Neuron_544	0.000148069	0.000120603	9.20867e-05	9.55106e-05	9.06811e-05	8.89051e-05	8.65413e-05	9.68174e-05	8.35118e-05	9.69842e-05	8.89227e-05	9.08681e-05	9.50877e-05	0.000102695	0.00010405	9.57018e-05	9.07344e-05	0.000120911	8.84518e-05	9.11178e-05	8.70967e-05	9.78575e-05	0.000110659	0.000108429	9.90618e-05	8.96522e-05	0.000106196	9.24257e-05	0.000114368	0.000112181	9.36716e-05	0.000106364	9.5826e-05	8.96126e-05	7.86484e-05	8.72113e-05	8.33008e-05	9.43312e-05	0.00010087	8.89842e-05	0.000115501	9.88947e-05	9.08447e-05	9.68658e-05	9.66571e-05	8.64038e-05	8.4793e-05	8.75548e-05	9.3211e-05
Neuron_545	0.000171493	0.000130812	0.000111992	8.51623e-05	8.47476e-05	8.02158e-05	9.23247e-05	9.14333e-05	7.92648e-05	0.000115034	9.04849e-05	8.96708e-05	9.17556e-05	0.000113293	8.6916e-05	8.34559e-05	9.3483e-05	0.000141024	8.41792e-05	8.44224e-05	8.18012e-05	8.34463e-05	9.70097e-05	0.000106693	9.60303e-05	7.95502e-05	9.71483e-05	8.4936e-05	0.000112044	0.000100106	8.69808e-05	0.000101587	9.9361e-05	6.7508e-05	8.23852e-05	7.32291e-05	7.57436e-05	8.82659e-05	7.7703e-05	7.45528e-05	9.13759e-05	7.99554e-05	8.60883e-05	8.20897e-05	9.56187e-05	6.56088e-05	7.10273e-05	8.1308e-05	9.06524e-05
Neuron_546	0.000200126	0.000154942	0.00010749	9.63683e-05	9.26322e-05	8.61724e-05	7.77279e-05	9.57275e-05	7.24992e-05	0.00010366	7.92474e-05	9.40841e-05	8.05872e-05	9.66436e-05	9.61982e-05	9.00779e-05	9.61296e-05	0.000124645	8.15062e-05	8.53421e-05	9.13984e-05	0.000105053	0.00010682	0.000112066	0.000101603	7.93677e-05	0.000109562	9.91951e-05	0.000186988	9.79293e-05	9.01905e-05	9.71021e-05	0.000107417	7.36881e-05	8.6522e-05	8.74822e-05	8.26024e-05	8.75744e-05	8.28909e-05	8.41748e-05	9.15851e-05	0.000110851	9.99118e-05	9.25613e-05	0.000132963	8.87747e-05	9.49183e-05	0.000101221	0.000100087
Neuron_547	0.000142369	0.000126997	0.000106406	9.26003e-05	8.26622e-05	8.7811e-05	8.82166e-05	8.76886e-05	8.15772e-05	9.61605e-05	8.37926e-05	8.21066e-05	8.97873e-05	0.000113715	9.47351e-05	8.50998e-05	8.58605e-05	0.00012152	8.80157e-05	9.25364e-05	7.8056e-05	8.19803e-05	8.5778e-05	8.93251e-05	8.85101e-05	9.60616e-05	9.66882e-05	7.97359e-05	9.64661e-05	9.60587e-05	9.35065e-05	9.25126e-05	9.04309e-05	8.03282e-05	7.95742e-05	7.91285e-05	6.84448e-05	9.50157e-05	8.73248e-05	8.09427e-05	0.000104205	9.87069e-05	7.87427e-05	7.08845e-05	7.73273e-05	7.7122e-05	7.26147e-05	7.95732e-05	7.5705e-05
Neuron_548	0.000163773	0.000142409	0.000119193	0.00011057	0.00010182	0.000111065	0.000100422	0.000112119	9.62923e-05	0.000122092	0.000100552	0.00010586	8.81315e-05	9.19043e-05	8.7251e-05	9.28225e-05	0.000116168	0.000151193	9.29881e-05	9.73687e-05	9.83167e-05	0.000105656	0.000112746	0.00011717	0.00010631	9.65562e-05	0.000109936	8.93718e-05	0.000157608	0.000123783	9.30537e-05	9.99566e-05	9.43759e-05	7.51948e-05	8.98124e-05	9.38066e-05	7.79262e-05	9.57556e-05	8.09107e-05	0.000100112	0.000108803	0.000141775	0.000107973	8.99875e-05	0.000107632	9.21827e-05	9.28466e-05	0.000101579	9.99605e-05
Neuron_549	0.00016746	0.000118137	8.75493e-05	8.24426e-05	8.22078e-05	7.90028e-05	7.1865e-05	8.75598e-05	6.55924e-05	8.98914e-05	7.60473e-05	7.80413e-05	7.0555e-05	8.39772e-05	7.61549e-05	7.37871e-05	8.26992e-05	0.000123223	6.88633e-05	7.20519e-05	7.19923e-05	8.05595e-05	9.28294e-05	0.000151896	9.71707e-05	8.11062e-05	9.23702e-05	7.79924e-05	0.000124314	9.59546e-05	7.23597e-05	7.64646e-05	8.17533e-05	6.19799e-05	8.54996e-05	7.31751e-05	6.58162e-05	8.39316e-05	7.89264e-05	6.13772e-05	0.000102526	9.96823e-05	7.28328e-05	7.77488e-05	0.000102743	6.9811e-05	7.30459e-05	7.93055e-05	8.45186e-05
Neuron_550	0.000199793	0.000149679	0.000126664	0.000108207	0.00010103	9.37096e-05	9.94602e-05	0.000105409	0.000101904	0.000113526	0.000103459	0.000108852	0.000105186	0.000107389	0.000111939	0.000109843	0.000129864	0.000144184	0.000104012	9.25902e-05	0.000111481	0.000117358	0.000120915	0.000122316	0.000106672	9.70993e-05	0.000130945	9.83748e-05	0.000182607	0.000122339	0.000106078	0.000111774	0.000120183	0.000101454	0.000108327	9.49757e-05	8.58325e-05	8.79426e-05	0.000103437	9.36562e-05	0.000107033	0.000108605	9.66649e-05	0.000127846	0.000126856	9.71937e-05	0.000100082	0.000111981	0.000113479
Neuron_551	0.000124806	0.000110197	9.01012e-05	6.88797e-05	6.66908e-05	6.81049e-05	7.14153e-05	7.48966e-05	6.07307e-05	8.12531e-05	6.95014e-05	6.71014e-05	7.69679e-05	8.20013e-05	7.05296e-05	6.86191e-05	7.03643e-05	8.14827e-05	5.89861e-05	6.20532e-05	6.24791e-05	6.06882e-05	6.50592e-05	7.82216e-05	6.91978e-05	7.01272e-05	7.04555e-05	6.65132e-05	9.63961e-05	8.32373e-05	7.61542e-05	7.56733e-05	7.58359e-05	5.87187e-05	5.9199e-05	5.89355e-05	5.28556e-05	7.44909e-05	6.25244e-05	6.16209e-05	7.42484e-05	7.08914e-05	5.95702e-05	6.00321e-05	6.98964e-05	5.76734e-05	6.00992e-05	6.62242e-05	6.5723e-05
Neuron_552	0.00016741	0.000155967	0.000114881	0.00010903	0.000101941	9.92696e-05	9.21324e-05	0.00010386	9.62242e-05	0.000104655	9.69971e-05	9.53819e-05	9.74442e-05	0.000103108	9.87754e-05	9.93281e-05	0.00010941	0.000131934	9.02842e-05	9.46684e-05	8.67621e-05	0.000100771	0.000102052	0.000117816	9.89051e-05	8.81075e-05	0.000112139	9.26887e-05	0.000109898	9.657e-05	8.99949e-05	0.000100183	8.96307e-05	9.12989e-05	9.8949e-05	0.000100669	8.33758e-05	9.4997e-05	9.72294e-05	8.92976e-05	0.000111301	0.000117364	0.00010105	9.43752e-05	9.03663e-05	8.94846e-05	8.642e-05	8.65576e-05	9.85582e-05
Neuron_553	0.000161953	0.000123416	0.000102319	8.74678e-05	8.41156e-05	8.9623e-05	0.000105049	9.13275e-05	8.03945e-05	0.000106785	9.39507e-05	9.39915e-05	7.33697e-05	8.10971e-05	0.000106574	8.8541e-05	9.25997e-05	0.000116498	8.26228e-05	8.77181e-05	7.16805e-05	8.26658e-05	0.000108201	9.95294e-05	0.000103656	7.90136e-05	9.96999e-05	7.97289e-05	0.000117046	8.60136e-05	6.37634e-05	7.95406e-05	8.23979e-05	7.67065e-05	9.73632e-05	7.67797e-05	7.57375e-05	6.58132e-05	6.918e-05	8.2256e-05	9.3565e-05	0.000110982	8.76836e-05	7.33479e-05	8.72849e-05	6.82323e-05	6.49006e-05	6.99795e-05	8.19689e-05
Neuron_554	0.000255374	0.000206129	0.000147805	0.000131707	0.000127725	0.000124747	0.000119158	0.000144343	0.000121275	0.000144046	0.000118307	0.000131593	0.000121987	0.00013783	0.000134843	0.000121303	0.000120448	0.000159817	0.000113254	0.000118915	0.000124275	0.000128552	0.000134023	0.000142681	0.000145011	0.000118889	0.000142242	0.000134275	0.000160722	0.000130374	0.000122918	0.000135728	0.000133398	0.000102127	0.000117648	0.000110433	0.000104496	0.000126482	0.000110797	0.000111808	0.000140452	0.000151165	0.00014063	0.000115087	0.000153217	0.000114749	0.000116397	0.000133591	0.000125377
Neuron_555	0.00019105	0.000154871	0.000141063	0.000131621	0.000133964	0.000137214	0.000131315	0.000128767	0.000112309	0.000130668	0.000121669	0.000122028	0.000120896	0.000123929	0.000123998	0.00012156	0.000132397	0.000159003	0.000112493	0.000109328	0.000102579	0.000115219	0.00011163	0.000119079	0.000129095	0.000114514	0.000137454	0.000112368	0.000143391	0.000131324	0.000107932	0.000125937	0.000111594	0.00010904	0.000116194	0.000121578	9.71553e-05	0.000115211	0.000117463	0.000114225	0.000139494	0.000145872	0.000123542	0.000108086	0.000124952	0.000118157	0.000110292	0.000114214	0.000114606
Neuron_556	0.00017161	0.00016027	0.000126727	0.000108694	0.000103191	0.000105587	9.57318e-05	0.000110536	0.000105139	0.000106189	0.000105413	0.000111567	9.88015e-05	0.000115199	0.000125996	0.000112076	0.000119381	0.000143711	9.43409e-05	9.43748e-05	9.01974e-05	0.000109417	0.000113297	0.000106202	0.000120237	9.9331e-05	0.000127425	0.000103961	0.000133461	9.43593e-05	9.05155e-05	9.67459e-05	9.63194e-05	9.31805e-05	0.000115239	0.000101553	9.19964e-05	0.000103398	9.76875e-05	0.00010521	0.000112265	0.000143636	0.000113838	0.00010333	0.000119599	0.000105043	0.000100877	0.000105246	0.000101773
Neuron_557	0.000159422	0.000132218	0.000100425	0.000100178	8.96001e-05	8.79963e-05	8.36269e-05	9.57996e-05	8.27368e-05	8.60473e-05	8.65374e-05	8.26678e-05	9.90758e-05	9.37682e-05	0.000100884	9.761e-05	9.74281e-05	0.000109989	8.64951e-05	8.818e-05	9.32238e-05	0.000101692	0.000105972	0.00011044	8.8969e-05	0.000100542	0.000113124	8.80362e-05	0.000122149	0.000109476	0.000100758	0.000109092	9.94398e-05	8.98778e-05	8.32135e-05	8.87211e-05	7.02924e-05	8.93703e-05	9.84348e-05	9.33527e-05	0.000108192	0.000110051	8.84813e-05	0.000103402	0.000103919	8.74664e-05	8.62144e-05	9.60521e-05	8.96858e-05
Neuron_558	0.000191276	0.000143634	0.000132976	0.000110169	0.00010674	0.000123023	0.000123387	0.000119493	0.000109136	0.000144202	0.000118203	0.000113576	9.16531e-05	0.000126039	0.000114532	0.000107089	0.000121381	0.000146124	0.000102065	0.000107157	9.55027e-05	0.000113787	0.000115282	0.000105828	0.000107201	9.48492e-05	0.000106413	8.09734e-05	0.000131275	0.000113202	8.18977e-05	8.39577e-05	9.24139e-05	9.58731e-05	8.62478e-05	8.32352e-05	8.60388e-05	9.78424e-05	8.78391e-05	0.000103231	0.000122703	0.000141302	0.000110194	0.00010041	8.97029e-05	9.01361e-05	7.8818e-05	8.96713e-05	9.42441e-05
Neuron_559	0.000158637	0.000135343	0.000107998	9.85365e-05	8.97449e-05	8.99824e-05	9.80734e-05	9.66705e-05	8.80982e-05	0.000104067	9.87161e-05	8.84076e-05	0.000103774	0.000109588	0.000113802	8.91712e-05	9.82359e-05	0.000127035	9.03485e-05	8.97149e-05	8.11722e-05	8.78647e-05	0.000101195	9.61272e-05	9.34069e-05	8.92474e-05	0.000102782	8.62983e-05	0.000111315	0.000109107	9.47124e-05	0.000104497	0.000108471	8.5818e-05	8.88365e-05	8.46941e-05	7.87288e-05	9.15177e-05	9.44719e-05	8.1522e-05	0.000119108	0.00010954	9.45301e-05	9.71279e-05	9.56711e-05	8.02579e-05	7.82792e-05	9.25502e-05	8.9143e-05
Neuron_560	0.000136391	0.000120073	9.61437e-05	7.27197e-05	7.30216e-05	6.70583e-05	7.81859e-05	8.08945e-05	7.95977e-05	9.48063e-05	7.39761e-05	7.46508e-05	7.17313e-05	7.64699e-05	6.96298e-05	7.68625e-05	8.5134e-05	0.00012005	7.11294e-05	6.93618e-05	7.81452e-05	8.04875e-05	8.16635e-05	8.32413e-05	8.57242e-05	6.63819e-05	9.09059e-05	7.25297e-05	0.000111131	7.57365e-05	7.30865e-05	8.46511e-05	7.87897e-05	6.3456e-05	7.66789e-05	7.06723e-05	6.31444e-05	6.71677e-05	6.92887e-05	6.75938e-05	7.24422e-05	7.07605e-05	6.20535e-05	6.28515e-05	7.43316e-05	6.39826e-05	6.7735e-05	6.90263e-05	7.19756e-05
Neuron_561	0.000297026	0.000252811	0.000181876	0.00015602	0.000155854	0.000157472	0.000147472	0.000165249	0.000143679	0.000179184	0.000154307	0.000143569	0.000125214	0.000151708	0.000131562	0.000143503	0.000165841	0.000215121	0.000126246	0.000131434	0.000131228	0.000155627	0.000155521	0.000154608	0.000164775	0.000132566	0.000177827	0.000150819	0.000220813	0.000150347	0.000129366	0.000154324	0.00015998	0.000136841	0.000152377	0.000152111	0.000126355	0.000130431	0.000135217	0.000141177	0.000134676	0.000173562	0.0001437	0.000142931	0.00014925	0.00013988	0.000136218	0.00014125	0.0001416
Neuron_562	0.000265655	0.000228989	0.000177095	0.000164518	0.000162727	0.000154899	0.00015435	0.000162771	0.000151282	0.000171567	0.000157936	0.000148839	0.000162167	0.000174206	0.000162592	0.000155581	0.000170918	0.000216342	0.000137391	0.000148036	0.000128002	0.000156874	0.00016995	0.00017087	0.000166059	0.000149814	0.000184314	0.000154182	0.000207708	0.000165425	0.000142766	0.000166585	0.000162953	0.00014362	0.000154924	0.000150211	0.000129617	0.00013444	0.000140327	0.000127086	0.000165436	0.000158701	0.00014379	0.000142621	0.000155845	0.000136886	0.000135425	0.000140288	0.000151548
Neuron_563	0.000220894	0.000180079	0.000144514	0.000113274	0.000103993	0.000100058	0.000105326	0.000107028	9.2108e-05	0.000140172	0.000103271	0.000105545	9.88932e-05	0.000122617	0.000102272	0.00010107	0.00010623	0.00017176	8.88116e-05	9.02929e-05	0.000105177	9.30491e-05	0.000101443	0.000124576	0.000116117	8.88309e-05	0.000105627	9.86977e-05	0.000135869	0.000121625	0.000100461	0.000102643	9.88222e-05	8.80443e-05	9.20476e-05	8.79467e-05	8.14432e-05	0.000108833	9.64778e-05	9.06282e-05	0.000121266	0.000120192	0.000106363	9.65855e-05	0.000106606	8.31897e-05	8.7986e-05	9.8145e-05	9.92755e-05
Neuron_564	0.000252653	0.000208508	0.000191589	0.000150377	0.000138787	0.00014814	0.000155542	0.000147287	0.000134263	0.000186541	0.000149188	0.000143314	0.000143965	0.000176375	0.000155209	0.000137172	0.000146901	0.000219268	0.000145741	0.000148497	0.000140265	0.000142752	0.00016163	0.000151487	0.000159257	0.00013505	0.000163641	0.000128112	0.000177991	0.000162829	0.00013818	0.000150553	0.000148933	0.000118827	0.000125853	0.000120789	0.000122163	0.000149063	0.000135216	0.000131913	0.000163729	0.00017037	0.000145189	0.00013389	0.000134685	0.000112057	0.000110129	0.000131272	0.000144536
Neuron_565	0.000113104	9.24515e-05	7.65073e-05	7.43598e-05	6.80495e-05	7.65318e-05	6.14963e-05	7.46823e-05	5.65432e-05	7.81642e-05	6.64221e-05	6.31004e-05	5.95727e-05	6.81906e-05	6.38278e-05	6.68823e-05	7.50993e-05	9.92894e-05	6.32691e-05	5.99893e-05	6.71564e-05	6.48529e-05	6.97385e-05	6.9417e-05	7.58873e-05	6.50803e-05	7.143e-05	6.07709e-05	9.64626e-05	7.72789e-05	6.74646e-05	7.78303e-05	6.37136e-05	6.49347e-05	6.62364e-05	7.3481e-05	6.16522e-05	6.78374e-05	6.22901e-05	7.5824e-05	8.01841e-05	9.50475e-05	7.80906e-05	7.14698e-05	7.87907e-05	7.13457e-05	6.77134e-05	7.32798e-05	7.38817e-05
Neuron_566	0.000167903	0.000138097	9.53022e-05	8.25892e-05	7.61433e-05	8.00626e-05	7.33539e-05	8.69252e-05	7.78512e-05	8.94608e-05	7.52568e-05	8.02331e-05	6.95543e-05	8.22623e-05	8.71508e-05	8.9115e-05	8.11882e-05	0.000113324	6.68247e-05	7.78287e-05	6.96907e-05	8.14403e-05	8.23745e-05	9.55203e-05	8.40736e-05	7.55736e-05	8.97801e-05	8.0491e-05	9.05911e-05	6.98083e-05	6.34184e-05	6.77787e-05	6.99699e-05	6.7201e-05	7.67169e-05	7.652e-05	6.89834e-05	7.62383e-05	7.02679e-05	7.28819e-05	7.09085e-05	9.53935e-05	7.86415e-05	7.36075e-05	8.16811e-05	7.52323e-05	7.14563e-05	7.39048e-05	8.13305e-05
Neuron_567	0.000195565	0.00012422	0.000102035	0.000110997	0.000106841	0.000103588	9.26328e-05	0.000111702	7.75688e-05	0.00011195	9.13546e-05	9.34437e-05	9.22844e-05	0.000108394	0.000104926	0.000106556	0.000105985	0.000152769	9.93051e-05	9.61681e-05	0.000103891	0.000112806	0.000126307	0.000126509	0.000115897	9.2189e-05	0.000105137	9.1521e-05	0.000184107	0.000103172	9.54721e-05	0.000108733	9.82168e-05	0.000101079	0.000100688	9.83002e-05	8.83694e-05	9.06653e-05	8.77128e-05	9.65904e-05	9.94721e-05	0.000114285	9.22477e-05	0.000100837	0.000129457	0.000102772	9.74153e-05	0.000100286	0.000103901
Neuron_568	0.000209567	0.000169223	0.000146249	0.00010666	0.000101855	0.000103541	0.00011602	0.000113558	9.27829e-05	0.000145982	0.000110932	0.00011023	8.05192e-05	0.000115468	9.44163e-05	9.75516e-05	0.000119492	0.000149778	9.06699e-05	9.33797e-05	9.65515e-05	9.81711e-05	0.000109771	0.000109998	0.000108231	7.76259e-05	0.000104787	8.73501e-05	0.000137262	9.53716e-05	7.83248e-05	8.60673e-05	9.77082e-05	8.31217e-05	8.67585e-05	7.77919e-05	8.25019e-05	8.27412e-05	7.80676e-05	8.75554e-05	9.28236e-05	0.000120092	0.000108396	9.88573e-05	0.000100907	8.15313e-05	8.25741e-05	9.59516e-05	9.45222e-05
Neuron_569	0.000136065	0.000125364	0.000104738	8.56121e-05	7.43642e-05	8.92115e-05	8.21868e-05	9.95333e-05	9.04233e-05	0.000105607	8.6488e-05	7.62503e-05	7.2811e-05	8.89274e-05	8.81958e-05	8.51559e-05	8.596e-05	0.000139899	8.64707e-05	8.81701e-05	8.88709e-05	9.9766e-05	0.000118496	9.53722e-05	9.81229e-05	8.43422e-05	0.000104424	7.51689e-05	9.68845e-05	7.63494e-05	7.76015e-05	9.88696e-05	8.33141e-05	7.64334e-05	7.32606e-05	8.03951e-05	6.97957e-05	8.66405e-05	8.22009e-05	8.0547e-05	9.20992e-05	9.82523e-05	8.09509e-05	8.69089e-05	9.03672e-05	7.50227e-05	6.79514e-05	7.22948e-05	7.54458e-05
Neuron_570	0.000134883	0.000102445	7.20473e-05	6.70176e-05	6.30886e-05	5.88636e-05	6.20858e-05	7.00142e-05	6.48927e-05	7.7986e-05	6.64264e-05	6.5113e-05	7.44356e-05	7.83875e-05	7.0635e-05	6.43496e-05	6.76973e-05	0.000103963	5.45164e-05	6.13375e-05	5.87964e-05	6.62923e-05	7.26335e-05	8.3715e-05	6.96166e-05	6.86652e-05	7.86473e-05	7.02533e-05	0.000111455	8.41733e-05	6.80614e-05	8.28491e-05	7.71432e-05	4.7983e-05	6.11726e-05	5.53267e-05	4.85263e-05	6.54936e-05	5.25349e-05	5.57546e-05	7.63508e-05	7.1975e-05	6.36575e-05	6.8273e-05	6.9458e-05	4.92313e-05	5.73693e-05	6.56492e-05	7.68137e-05
Neuron_571	0.000143632	9.33652e-05	7.18325e-05	6.34324e-05	6.256e-05	5.78538e-05	5.34431e-05	6.19991e-05	5.29506e-05	6.73746e-05	5.83076e-05	5.99224e-05	5.81913e-05	6.4897e-05	6.60632e-05	6.20371e-05	6.67127e-05	8.56084e-05	5.21635e-05	5.63336e-05	5.61788e-05	6.27488e-05	6.65067e-05	0.000112767	6.49491e-05	6.30777e-05	6.36124e-05	5.67328e-05	8.33183e-05	6.96072e-05	5.78162e-05	6.40933e-05	6.63747e-05	5.40326e-05	6.39707e-05	6.0165e-05	5.85011e-05	6.99459e-05	6.21749e-05	5.84832e-05	7.68226e-05	6.08947e-05	5.45027e-05	6.00047e-05	7.39702e-05	5.30148e-05	5.89661e-05	6.43304e-05	6.51803e-05
Neuron_572	0.000199637	0.000142231	0.000113707	0.000106367	0.000110637	0.000104825	0.000100214	0.000118486	8.65526e-05	0.000112653	9.83524e-05	0.000106172	0.000108798	0.000114175	0.000114348	0.000104533	0.00010684	0.000142141	9.5199e-05	9.31955e-05	9.13643e-05	9.94448e-05	0.000113916	0.000124663	0.000120897	0.000106023	0.000108484	9.69564e-05	0.000146573	0.000116985	0.000103736	0.000115695	0.000106425	9.8777e-05	0.000103747	9.13748e-05	8.52719e-05	0.000102064	9.29952e-05	9.14534e-05	0.000107162	0.000101312	9.86699e-05	9.76381e-05	0.000127288	9.47633e-05	9.28893e-05	0.000102423	0.000106377
Neuron_573	0.000108919	9.54269e-05	7.8879e-05	7.66247e-05	6.56438e-05	7.05508e-05	6.10489e-05	6.79464e-05	5.98264e-05	5.83494e-05	6.09769e-05	6.31381e-05	7.21901e-05	7.32575e-05	7.71805e-05	6.45287e-05	8.06674e-05	0.000114071	7.0283e-05	7.03249e-05	5.79144e-05	6.97337e-05	6.76091e-05	7.61673e-05	6.23878e-05	7.00955e-05	8.04867e-05	6.23305e-05	9.43088e-05	8.47014e-05	8.27482e-05	7.70323e-05	7.39152e-05	6.36599e-05	5.93396e-05	5.94897e-05	5.29999e-05	7.85176e-05	7.06549e-05	6.01043e-05	0.000106551	0.000102782	7.62765e-05	7.34255e-05	7.93342e-05	6.38633e-05	6.33578e-05	7.62281e-05	7.99841e-05
Neuron_574	0.000246017	0.000173033	0.000131547	0.000127725	0.00012618	0.000112291	0.000113826	0.000127453	0.000109795	0.000132978	0.000108926	0.000128132	0.000128645	0.000137617	0.000136043	0.000115369	0.000123838	0.000179481	0.000110423	0.000108738	0.000112105	0.000116026	0.000128368	0.000140594	0.000148332	0.000110146	0.000144479	0.000126948	0.000164238	0.000127312	0.000119992	0.000133423	0.000124658	9.26727e-05	0.000124617	0.000109658	0.000108932	0.000123147	0.000110347	0.00010285	0.000142721	0.000128974	0.00013325	0.000100064	0.000151675	0.000101119	0.000108319	0.000121609	0.000125984
Neuron_575	0.000219839	0.000172855	0.000143085	0.000141411	0.000137399	0.00013516	0.000144335	0.000141779	0.000117519	0.000145945	0.000133509	0.000143699	0.000126293	0.000148183	0.000155521	0.000134872	0.000154395	0.000181259	0.000142349	0.000144225	0.000121598	0.000125955	0.000156915	0.000151329	0.000151897	0.000133203	0.000161063	0.000128152	0.000200905	0.000134623	0.000113218	0.000140333	0.000135058	0.000124166	0.00013851	0.00012688	0.000116676	0.000115999	0.000112382	0.000118268	0.000153285	0.000149494	0.000128858	0.000111747	0.000148802	0.000126319	0.000119362	0.000118676	0.000135177
Neuron_576	0.000112762	0.00010788	8.3338e-05	7.5598e-05	6.88981e-05	7.5726e-05	7.09896e-05	7.45215e-05	7.42885e-05	9.38034e-05	7.62123e-05	7.12031e-05	6.11446e-05	7.12633e-05	6.18099e-05	6.78055e-05	6.77703e-05	9.48812e-05	5.62859e-05	6.19778e-05	6.23126e-05	7.45684e-05	7.47099e-05	6.836e-05	7.08994e-05	6.51614e-05	8.0844e-05	7.15241e-05	8.52399e-05	7.99928e-05	5.99135e-05	6.52083e-05	6.72823e-05	6.46843e-05	6.49609e-05	6.67658e-05	5.69354e-05	5.90814e-05	5.46413e-05	6.08776e-05	5.7891e-05	7.7887e-05	6.74044e-05	6.74044e-05	6.73132e-05	6.63787e-05	6.42461e-05	5.48657e-05	6.785e-05
Neuron_577	6.59743e-05	5.8168e-05	4.37958e-05	3.53854e-05	3.31171e-05	3.28769e-05	3.62379e-05	3.46391e-05	3.57787e-05	4.10662e-05	3.45022e-05	3.44054e-05	3.42761e-05	3.6988e-05	3.69306e-05	3.2902e-05	4.14732e-05	4.8089e-05	3.35319e-05	3.35202e-05	3.12543e-05	3.91698e-05	3.84308e-05	4.15901e-05	3.25784e-05	3.07326e-05	3.6232e-05	3.02153e-05	6.40539e-05	3.93465e-05	3.54694e-05	3.91386e-05	4.43658e-05	3.15987e-05	3.48576e-05	3.206e-05	3.0319e-05	3.14354e-05	3.28783e-05	3.19482e-05	3.83669e-05	3.88383e-05	3.45939e-05	4.23333e-05	4.03761e-05	3.36589e-05	3.3685e-05	3.60801e-05	3.81325e-05
Neuron_578	0.000203752	0.000172223	0.000126471	0.000134144	0.000121779	0.000124037	0.000110402	0.000121938	0.000111251	0.000126958	0.000116249	0.000117879	0.000111256	0.0001215	0.000123334	0.000120471	0.000118209	0.000145874	0.000107537	0.00010351	0.000108405	0.000111066	0.000124083	0.000127337	0.000125138	0.000108335	0.000125512	0.000111692	0.000125955	0.000134573	0.000109915	0.000110074	0.000104204	0.000117431	0.000101723	0.000103705	9.5388e-05	0.000109279	0.00011652	0.000101319	0.000130038	0.00014469	0.000122204	0.000129663	0.000109394	0.000118558	0.000100889	0.000107434	0.000116749
Neuron_579	0.000260186	0.000222688	0.000185187	0.000162161	0.000155878	0.000140955	0.000135131	0.000154882	0.000121388	0.000171366	0.000135473	0.000142952	0.000135645	0.000158791	0.000133118	0.000134066	0.000154036	0.000184727	0.000123278	0.000122377	0.000138128	0.000141165	0.000136667	0.000162789	0.000153615	0.000113723	0.000155372	0.000128769	0.000160222	0.000136887	0.00012844	0.000136498	0.000127876	0.000111455	0.000124872	0.000125788	0.000116416	0.000135039	0.000124984	0.000122721	0.000141651	0.00015972	0.000154996	0.000136149	0.000161455	0.000127213	0.000133039	0.0001311	0.00014426
Neuron_580	0.000258225	0.000203804	0.000171827	0.000157526	0.000161232	0.000146478	0.00015947	0.000157749	0.000140444	0.000166926	0.000151301	0.000149137	0.000164343	0.000168775	0.000161237	0.000150739	0.000165208	0.00022048	0.000144148	0.000147761	0.000136154	0.000152725	0.000163312	0.000202007	0.000158137	0.000140753	0.000169849	0.000143135	0.000171007	0.000163201	0.000146109	0.000177351	0.000161786	0.000128314	0.00014593	0.000130786	0.000126975	0.000143359	0.000140848	0.000129058	0.000186591	0.000149004	0.000134336	0.000139576	0.000146642	0.00012912	0.000133159	0.000135114	0.000154047
Neuron_581	0.000158015	0.000137176	0.000104952	9.9017e-05	8.57111e-05	8.8542e-05	8.03344e-05	8.55967e-05	7.09853e-05	8.30916e-05	7.70989e-05	7.52335e-05	8.26494e-05	8.45462e-05	8.39466e-05	8.56396e-05	9.10926e-05	0.00013394	8.03615e-05	8.39838e-05	8.44783e-05	9.03587e-05	9.30362e-05	8.77344e-05	8.04256e-05	8.44386e-05	9.379e-05	7.84933e-05	0.000169437	0.000109228	9.95659e-05	9.44767e-05	9.48938e-05	7.16016e-05	6.5642e-05	8.29076e-05	7.12907e-05	9.60545e-05	8.69804e-05	8.71422e-05	0.00010023	9.76408e-05	7.9726e-05	8.59151e-05	8.70138e-05	8.00869e-05	8.32985e-05	9.38363e-05	9.16508e-05
Neuron_582	0.000251727	0.000195177	0.00014798	0.000146784	0.000130094	0.000131395	0.000128932	0.000134478	0.000126288	0.000153021	0.000138622	0.000129001	0.000119135	0.000154805	0.000142462	0.000129285	0.000119852	0.000211593	0.000123288	0.000128717	0.000122957	0.000127353	0.00014657	0.000147879	0.000128918	0.000120782	0.00012204	0.000121132	0.000188323	0.000147431	0.000121297	0.000135001	0.000147222	0.000132422	0.000123886	0.000110784	0.000108065	0.000124732	0.000110885	0.000121681	0.000145607	0.000171518	0.000126861	0.000118668	0.000123813	0.000122716	0.000107879	0.000115627	0.000113162
Neuron_583	0.000265691	0.000191066	0.000145758	0.000135719	0.000141422	0.000126092	0.00012819	0.000142054	0.000115115	0.000142855	0.000121305	0.000137185	0.000128827	0.000145408	0.000143932	0.000128791	0.000143508	0.000186586	0.000115137	0.000120468	0.000114456	0.000125703	0.000144727	0.000151443	0.000156559	0.00011577	0.000157591	0.000137759	0.000184851	0.000127002	0.000118143	0.000145241	0.000125298	0.000108963	0.000136111	0.000127555	0.000117456	0.000124834	0.000117561	0.000117653	0.000143276	0.000143349	0.000145736	0.000106879	0.000170035	0.000120706	0.000122627	0.000131165	0.000138514
Neuron_584	0.000168663	0.000127639	0.000114005	0.000102301	0.000109779	0.000110416	0.000111775	0.000116792	9.32662e-05	0.0001199	0.000110031	0.000102884	0.000107548	0.000112088	0.000101814	9.64376e-05	0.000105349	0.000150013	9.51759e-05	9.00975e-05	8.99643e-05	9.49978e-05	9.65492e-05	0.000115676	0.00011401	0.000101829	0.000110593	9.91866e-05	0.000119196	0.000116656	9.71598e-05	0.000126278	0.000111295	9.30399e-05	0.00010479	0.000100559	9.01324e-05	0.000102085	9.57959e-05	9.89864e-05	0.000128561	0.000101529	0.000100813	9.51114e-05	0.000102853	0.000100825	9.35323e-05	9.54519e-05	0.000100932
Neuron_585	0.000197756	0.000167192	0.000132523	0.000122221	0.000115969	0.000111813	0.000102944	0.00012832	9.91152e-05	0.00011835	0.00010132	0.000104565	0.000109487	0.000102562	0.000101255	0.000102969	0.000107782	0.000141687	9.71421e-05	0.000106536	0.000114282	0.000125029	0.000131334	0.000124643	0.000112431	0.000108789	0.000128397	0.000104217	0.000193854	0.000127164	0.000114737	0.000147772	0.000131533	0.000101487	9.13084e-05	0.000115271	9.22988e-05	0.000110245	0.000110904	0.00012255	0.000124641	0.000121562	0.000108692	0.000115518	0.000130662	0.000110072	0.000109357	0.000113536	0.000112221
Neuron_586	0.000201701	0.000183299	0.000140214	0.000131147	0.000106429	0.000114361	0.000102241	0.000112991	9.4146e-05	0.000125033	9.87365e-05	0.000112251	9.85213e-05	0.000101926	0.000107231	9.82736e-05	0.000107713	0.000176451	0.000108484	0.000110169	0.000115927	0.000112221	0.00013285	0.000133256	0.000124089	0.000100986	0.000117339	9.87027e-05	0.000179712	0.000121252	0.000109615	0.000119996	0.000109321	9.0206e-05	8.65041e-05	9.01052e-05	7.97305e-05	0.000104761	9.64013e-05	9.91001e-05	0.000116749	0.000138293	0.000113316	0.000105807	0.000123558	9.0273e-05	9.15888e-05	0.00011424	0.000116624
Neuron_587	0.000242284	0.00018752	0.000158885	0.000129791	0.000126092	0.00013453	0.00014415	0.00014098	0.000113519	0.0001628	0.000146679	0.00013149	0.000104031	0.000157234	0.000136853	0.000138454	0.00013271	0.000166012	0.000129733	0.000142481	0.000121178	0.000145932	0.000157076	0.000153882	0.000122288	0.000120098	0.000128764	0.000111968	0.000198809	0.000131024	0.000103954	0.000120661	0.000127693	0.000124916	0.000105053	0.000109649	0.000113898	0.000118869	0.000108152	0.000127814	0.000140094	0.000163057	0.00012978	0.000114505	0.000136881	0.000123413	0.000108688	0.000115211	0.000110724
Neuron_588	0.000165282	0.000143146	0.000113728	9.31192e-05	8.38005e-05	9.57298e-05	8.93108e-05	0.000100522	9.3599e-05	0.00010684	9.25661e-05	9.0272e-05	7.69227e-05	9.71564e-05	9.48656e-05	9.11913e-05	8.9412e-05	0.000143641	8.58768e-05	9.57685e-05	8.52664e-05	0.000102162	0.000111986	0.000102684	8.72788e-05	8.66694e-05	0.000102011	7.88114e-05	0.000103414	8.54268e-05	7.6457e-05	9.66758e-05	8.92247e-05	7.91312e-05	8.12078e-05	8.62691e-05	8.14768e-05	9.83162e-05	7.80245e-05	9.24561e-05	9.81561e-05	0.000103692	9.00671e-05	8.05009e-05	8.32653e-05	7.74348e-05	7.17556e-05	7.66021e-05	8.42779e-05
Neuron_589	0.000110889	0.000103321	6.45786e-05	5.54217e-05	4.86177e-05	4.63545e-05	4.72938e-05	5.34598e-05	5.77069e-05	6.09311e-05	4.7858e-05	5.20856e-05	4.54399e-05	4.74859e-05	4.45684e-05	4.46166e-05	6.25494e-05	0.000100507	4.42705e-05	4.49602e-05	4.73053e-05	6.46919e-05	6.28129e-05	7.26643e-05	5.35921e-05	4.86305e-05	6.54351e-05	5.6117e-05	0.000139067	6.49848e-05	4.85063e-05	6.51218e-05	7.08252e-05	4.27143e-05	5.07654e-05	4.80307e-05	4.68142e-05	4.8518e-05	5.18642e-05	4.69996e-05	5.17886e-05	6.15324e-05	4.84894e-05	6.80598e-05	6.41819e-05	4.93371e-05	5.17693e-05	5.52056e-05	6.11719e-05
Neuron_590	0.000167118	0.000143618	0.000116659	0.000118464	0.000114426	9.97128e-05	9.98506e-05	0.000105945	9.31738e-05	0.0001057	9.30347e-05	9.38987e-05	0.000101842	0.000102253	9.71964e-05	9.66912e-05	0.000111095	0.000112773	9.14887e-05	9.24378e-05	9.16951e-05	0.000101505	9.59464e-05	0.000116911	9.17174e-05	8.70935e-05	0.000107758	8.86381e-05	0.000110994	0.000101616	8.73728e-05	0.000106708	9.12003e-05	8.34698e-05	9.33924e-05	9.85573e-05	8.46669e-05	9.10088e-05	9.20497e-05	9.72641e-05	0.000106959	0.00010128	9.56309e-05	0.000103942	9.11759e-05	8.52066e-05	8.5438e-05	9.12582e-05	0.000101058
Neuron_591	0.000199611	0.000176316	0.000151608	0.000118792	0.000100043	0.000108737	0.000109155	0.000108275	9.85551e-05	0.000147166	0.000111319	0.000112202	9.53362e-05	0.000125024	0.000111933	0.000107228	0.000135783	0.000216648	0.000104454	0.000106571	0.000103695	0.000113114	0.00011211	0.000110456	0.000113364	9.28061e-05	0.000109096	9.21196e-05	0.000174332	0.000120411	0.000106635	0.000105112	0.000109945	8.96179e-05	9.20706e-05	8.84613e-05	8.75171e-05	0.000102625	0.000108693	9.26053e-05	0.00011252	0.000128042	0.00011769	0.000106299	0.000113987	8.99505e-05	0.000101655	0.000115779	0.00010704
Neuron_592	0.00012029	0.00010292	7.38925e-05	6.87084e-05	6.17004e-05	5.87494e-05	6.18349e-05	7.15247e-05	7.4643e-05	7.50822e-05	6.58041e-05	6.76318e-05	7.46417e-05	7.53367e-05	7.27613e-05	7.00058e-05	8.41996e-05	9.81009e-05	6.32699e-05	6.83305e-05	7.26544e-05	8.59645e-05	9.13808e-05	9.24425e-05	7.5899e-05	7.00979e-05	9.36735e-05	7.22635e-05	9.78584e-05	7.51736e-05	7.26565e-05	9.16022e-05	8.61565e-05	6.00449e-05	7.21619e-05	6.90151e-05	5.84722e-05	6.66566e-05	6.79735e-05	6.61016e-05	7.83238e-05	7.69405e-05	6.874e-05	8.35608e-05	8.06872e-05	6.17355e-05	6.42509e-05	7.37116e-05	7.9083e-05
Neuron_593	0.000142263	0.000107644	8.48128e-05	7.22178e-05	6.61947e-05	6.2834e-05	6.96176e-05	6.84044e-05	6.79139e-05	7.72393e-05	6.55452e-05	6.67016e-05	5.73821e-05	7.52373e-05	6.70083e-05	6.5121e-05	8.48634e-05	0.000101516	5.71357e-05	6.34829e-05	6.05306e-05	8.37982e-05	7.70157e-05	7.75309e-05	6.42897e-05	6.10643e-05	8.42501e-05	6.41166e-05	0.000151155	7.57592e-05	6.53549e-05	8.02321e-05	9.14567e-05	6.65766e-05	6.34578e-05	5.93247e-05	5.84583e-05	5.94571e-05	6.48972e-05	5.96757e-05	6.69853e-05	7.80063e-05	6.38496e-05	8.24291e-05	6.9267e-05	6.00422e-05	6.31003e-05	6.79918e-05	7.02452e-05
Neuron_594	0.000202418	0.000174177	0.000128419	0.000113748	0.000100566	0.000102017	9.60557e-05	0.000118467	9.68608e-05	0.000109446	9.04359e-05	9.62731e-05	9.42118e-05	0.000104992	0.000109063	0.000108113	0.000108612	0.000149316	0.000102515	0.000104677	0.000112468	0.000122755	0.000135672	0.000125099	0.000108888	0.000105901	0.000128784	9.78974e-05	0.000147745	0.000118629	0.000107507	0.000132347	0.000117457	9.52885e-05	9.01641e-05	0.000104606	9.04367e-05	0.000107132	0.000111076	0.000109104	0.000118057	0.00011798	0.000105389	0.000116291	0.000125961	0.000103074	0.00010156	0.000102055	0.000103192
Neuron_595	0.000190499	0.000166229	0.000139464	0.00011768	0.000116128	0.000103793	0.000108849	0.000119842	0.000101197	0.000127687	0.000113022	0.000112849	0.000114463	0.000120099	0.000118075	0.000114062	0.000136581	0.000136229	0.000103408	0.000105853	9.51135e-05	0.000118633	0.000107995	0.000124023	0.000106174	9.02613e-05	0.000109058	9.46654e-05	0.00012046	0.000103386	9.6598e-05	0.000100975	0.000105553	9.57952e-05	0.000102298	0.000102643	9.22204e-05	9.80778e-05	0.000101407	9.67835e-05	0.000108828	0.000117059	0.000116136	0.000113386	0.00011601	0.000100477	0.000101873	0.00010815	0.000114296
Neuron_596	0.000105723	9.18751e-05	7.09505e-05	7.58591e-05	6.87242e-05	6.27627e-05	6.03184e-05	6.58582e-05	6.36132e-05	6.66606e-05	6.86394e-05	6.3851e-05	6.84981e-05	6.73562e-05	7.37212e-05	6.56335e-05	7.00429e-05	7.61415e-05	6.30541e-05	5.68128e-05	6.1849e-05	6.69902e-05	6.61073e-05	6.90419e-05	6.17951e-05	6.02037e-05	7.1689e-05	5.94568e-05	7.10823e-05	6.28003e-05	5.5862e-05	5.71611e-05	5.80352e-05	6.6789e-05	6.2834e-05	5.62245e-05	4.64585e-05	4.80935e-05	6.07939e-05	5.50354e-05	6.87215e-05	7.99648e-05	6.10507e-05	7.22432e-05	6.02277e-05	6.18717e-05	5.61154e-05	6.53615e-05	6.73192e-05
Neuron_597	0.000125233	9.82001e-05	8.25313e-05	6.79452e-05	6.52476e-05	6.02191e-05	6.73176e-05	7.2887e-05	6.67379e-05	8.0944e-05	6.06384e-05	6.36696e-05	5.86942e-05	6.94844e-05	6.14847e-05	6.39619e-05	8.21284e-05	9.60426e-05	5.85571e-05	5.99541e-05	6.87406e-05	7.49889e-05	7.7874e-05	7.80241e-05	6.83233e-05	5.60137e-05	8.21968e-05	6.0684e-05	0.00011907	7.26277e-05	6.46338e-05	8.87546e-05	8.26397e-05	6.04938e-05	7.19145e-05	6.46506e-05	5.95812e-05	5.77412e-05	6.05648e-05	6.34067e-05	6.16961e-05	6.69525e-05	6.02688e-05	7.79526e-05	7.81196e-05	6.17472e-05	5.91731e-05	6.5459e-05	6.6312e-05
Neuron_598	0.00017409	0.000136199	0.00010916	0.000100327	0.000102735	0.000102858	9.98961e-05	0.000108131	0.000102142	0.000119399	0.000100289	9.54688e-05	0.000110872	0.000122763	0.0001081	0.000106388	0.000106465	0.000136297	9.03775e-05	0.000100525	9.59111e-05	9.98909e-05	0.00011362	0.000112463	0.000112175	0.000103773	0.000114641	0.000104955	0.00013233	0.000135203	0.000101361	0.000125958	0.000114598	9.68027e-05	9.45277e-05	9.45271e-05	8.92068e-05	0.000101669	9.28966e-05	9.81121e-05	0.000122051	0.000121053	0.000104817	0.000106544	9.77433e-05	9.51488e-05	8.93241e-05	9.10087e-05	9.82906e-05
Neuron_599	0.000191836	0.000174073	0.000139941	0.000124875	0.000115398	0.000113193	0.000105049	0.000121948	9.5009e-05	0.000129518	0.000110571	0.000104575	9.75803e-05	0.000103724	0.00010384	0.000100146	0.000122625	0.000150419	0.000109576	0.000110452	0.000110025	0.000111211	0.000122864	0.00011417	0.00011184	9.13699e-05	0.000117186	9.2954e-05	0.000174315	9.93349e-05	9.70336e-05	0.000126063	0.000119611	0.000101515	0.000101632	0.000117544	0.000102701	0.00010492	0.000102866	0.000110719	0.000125367	0.000127022	0.000111356	0.000108974	0.000124564	0.000106627	0.000102736	0.00011403	0.000126573
Neuron_600	0.000138771	0.000131356	0.000115211	0.000110157	9.67796e-05	0.000101037	9.26952e-05	9.44734e-05	9.24592e-05	9.98629e-05	9.69432e-05	9.43839e-05	9.76158e-05	0.00011915	0.000105468	9.49671e-05	9.74931e-05	0.000135272	0.000102019	9.75498e-05	8.51298e-05	9.20635e-05	0.000105433	0.000122415	0.000108455	9.70539e-05	0.000115642	8.96958e-05	0.000119046	9.72705e-05	9.94685e-05	0.000106696	9.33036e-05	8.62803e-05	0.000103032	9.27577e-05	8.49484e-05	0.000108773	0.000106199	9.39148e-05	0.000135862	0.000127789	0.000100749	9.48331e-05	0.000101042	9.71808e-05	8.89593e-05	8.99229e-05	8.8372e-05
Neuron_601	0.000228043	0.000196904	0.000158355	0.000123968	0.000112542	0.000102259	0.000106417	0.000121588	9.46196e-05	0.000142334	0.000107591	0.000114891	0.000103983	0.000138114	0.000108835	0.000113975	0.000132423	0.000171657	0.000114922	0.000112505	0.00011318	0.000124698	0.000121368	0.000130357	0.000114511	9.05145e-05	0.00013141	9.53393e-05	0.000231771	0.00012081	0.000114079	0.000117867	0.000137887	9.90713e-05	0.000100854	0.000108789	0.000107175	0.000109377	0.000109765	0.000106248	0.000123884	0.000125365	0.000111678	0.000112808	0.000143006	0.000100167	0.000106619	0.000120276	0.000128876
Neuron_602	0.000206068	0.00017666	0.000139598	0.000119061	0.00010735	0.000108081	9.99674e-05	0.000125291	0.000119709	0.000146327	0.000122486	0.000107569	9.92142e-05	0.000109388	0.000102629	9.81691e-05	0.000110528	0.000190369	0.000101381	0.000104515	0.000111487	0.000111046	0.000127252	0.000139053	0.000129555	0.000100548	0.00011829	0.000100152	0.000143215	0.000128402	9.20624e-05	0.000112324	0.000100402	9.39966e-05	0.00011487	9.97756e-05	9.91192e-05	0.000118978	0.000102613	9.79688e-05	0.000110309	0.000145106	0.000115381	0.000119066	0.000123591	0.000109326	0.00010611	0.000103228	0.000111882
Neuron_603	0.000179512	0.000142935	0.000125716	9.12163e-05	8.99323e-05	8.47492e-05	9.10734e-05	0.000100255	7.34368e-05	0.000121684	9.41839e-05	9.01753e-05	7.8635e-05	0.000112574	8.91074e-05	8.12387e-05	9.12449e-05	0.00014838	8.72391e-05	8.79117e-05	9.18942e-05	9.38182e-05	0.00010427	0.000158003	0.000109548	8.18051e-05	0.000111997	8.27637e-05	0.000135108	0.000100535	7.9121e-05	8.49876e-05	9.56897e-05	8.00505e-05	9.43752e-05	8.07356e-05	8.25287e-05	9.03935e-05	8.52431e-05	7.4899e-05	0.000128724	0.0001289	9.10698e-05	9.17287e-05	0.00011912	7.99643e-05	8.04836e-05	9.64155e-05	0.000103149
Neuron_604	0.000236318	0.000172703	0.000146972	0.000137364	0.000133139	0.000127948	0.000124026	0.000126678	0.000123514	0.000140534	0.000125479	0.000119968	0.000132903	0.00014653	0.000127919	0.000127895	0.000123776	0.000205812	0.000126436	0.00012368	0.000125268	0.000122296	0.000142684	0.000153138	0.00013256	0.000119552	0.000127733	0.000114154	0.000207992	0.000163039	0.000140421	0.000139489	0.000140109	0.000116622	0.000120854	0.000111893	0.00010692	0.000139474	0.000129794	0.000121351	0.000161989	0.000170055	0.00012588	0.000122912	0.000138138	0.0001265	0.00012495	0.000128899	0.000113041
Neuron_605	0.000179808	0.000151752	0.000104219	0.00010245	8.63563e-05	8.47664e-05	7.78772e-05	8.7671e-05	7.28117e-05	8.87494e-05	7.72118e-05	7.69261e-05	8.97669e-05	9.28192e-05	9.22005e-05	7.92607e-05	8.18846e-05	0.000150627	7.96634e-05	8.15658e-05	8.68414e-05	7.73087e-05	8.8912e-05	8.77179e-05	8.29508e-05	7.87245e-05	8.87712e-05	8.53379e-05	0.000134333	0.000113027	9.54431e-05	0.000105059	0.000106947	8.33985e-05	7.80061e-05	7.7469e-05	7.05399e-05	9.42639e-05	8.68198e-05	8.39226e-05	0.00011404	0.000105245	9.1879e-05	8.33975e-05	8.25426e-05	6.98856e-05	7.37455e-05	9.32483e-05	9.44895e-05
Neuron_606	0.000158869	0.000125513	9.67845e-05	9.86709e-05	9.19348e-05	8.36293e-05	9.20466e-05	9.41599e-05	8.8619e-05	0.00010507	9.44918e-05	8.39909e-05	9.75015e-05	0.000103499	9.92789e-05	8.49847e-05	9.73327e-05	0.000156256	8.37248e-05	7.91521e-05	8.02727e-05	7.90003e-05	9.27751e-05	0.000133988	9.58559e-05	8.0816e-05	9.81543e-05	8.6783e-05	9.66727e-05	0.00010065	0.000100438	0.000119902	0.000103551	8.41869e-05	9.97016e-05	8.98529e-05	9.02868e-05	9.80765e-05	9.8779e-05	8.66311e-05	0.000147391	9.42864e-05	9.73202e-05	8.70328e-05	9.48837e-05	7.32255e-05	7.37338e-05	8.34244e-05	8.63366e-05
Neuron_607	0.000245028	0.000211259	0.000141782	0.000132073	0.000120603	0.000117565	0.000106896	0.000128474	0.000115865	0.000132522	0.000108721	0.0001155	0.000112453	0.000122038	0.000122232	0.000129546	0.000126128	0.000178676	9.41011e-05	9.80111e-05	0.000115566	0.000106247	0.000106557	0.000109294	0.000137061	0.000109675	0.000141825	0.000128869	0.000169399	0.000136991	0.000120381	0.000109126	0.00010478	0.000105744	0.000112671	0.000118471	9.25197e-05	0.000119781	0.000115436	0.000118489	0.000121579	0.000154241	0.00013427	0.000114103	0.000120147	0.000105344	0.000110503	0.000121936	0.000117523
Neuron_608	0.00022593	0.000153903	0.000123046	0.000119504	0.000118798	0.000117237	0.000107292	0.000122519	9.92087e-05	0.000129021	0.00010357	0.000108419	0.00010862	0.00012588	0.000125018	0.000114971	0.000114565	0.000143842	0.000122445	0.000121525	0.000117527	0.000133113	0.000153019	0.000155701	0.000132365	0.000109554	0.000125078	0.000112909	0.000167429	0.000113321	0.000109719	0.000128615	0.00012419	9.2698e-05	0.000113226	0.000105045	0.000103787	0.000117277	9.48157e-05	9.99811e-05	0.000126575	0.000136103	0.000102568	0.000103307	0.00015337	0.000108405	0.000104723	0.000115384	0.000107797
Neuron_609	0.000196382	0.000180196	0.000143516	0.000127079	0.000121686	0.000112736	0.000114475	0.000115806	0.000109596	0.000123536	0.000110623	9.66594e-05	0.000101772	0.000111354	0.000106486	0.000103941	0.000128954	0.000176236	0.000107097	0.000105799	0.000102173	0.000120473	0.000122015	0.000126788	0.000104111	9.91083e-05	0.00011638	0.000101297	0.000182663	0.000116042	0.000102478	0.00012674	0.000126943	9.82764e-05	0.000104679	0.000106703	9.20566e-05	9.67106e-05	0.000104092	0.000100457	0.000121156	0.000119915	0.000104602	0.000111901	0.00010123	0.0001021	9.97471e-05	9.99615e-05	0.000107922
Neuron_610	0.000200821	0.00014877	0.000119655	0.000142274	0.000123135	0.0001187	9.53099e-05	0.000124127	0.000101248	0.000125865	0.000100651	9.33037e-05	0.000102304	0.000113894	0.000111426	0.000110009	0.000124175	0.000146039	0.000116607	0.000107175	0.000129182	0.000126575	0.000145458	0.000138398	0.000126222	0.000106345	0.000127223	9.89727e-05	0.000174248	0.000102718	0.000101681	0.000128804	0.000105372	0.000110426	0.00011284	0.000114307	0.000100239	0.000106237	0.000102366	0.000113279	0.000124381	0.000141696	0.000118118	0.000128395	0.000144086	0.000124224	0.000113093	0.000118567	0.000127371
Neuron_611	0.000148841	0.000142194	0.000109016	9.52276e-05	8.80266e-05	9.26058e-05	8.6963e-05	8.47315e-05	9.29244e-05	8.72121e-05	9.02544e-05	8.50014e-05	9.63733e-05	9.78407e-05	9.94911e-05	9.03553e-05	0.000104607	0.00016835	8.61788e-05	8.4911e-05	7.47984e-05	9.17343e-05	9.88189e-05	9.93841e-05	9.06077e-05	9.36914e-05	9.32079e-05	8.25713e-05	0.000131975	0.000111611	0.000102981	9.52874e-05	9.14451e-05	8.35152e-05	9.07424e-05	8.12514e-05	6.78553e-05	9.50893e-05	9.41987e-05	7.57142e-05	0.00011931	0.000118925	9.19402e-05	9.38884e-05	0.000101067	8.42138e-05	8.56654e-05	8.93442e-05	9.11557e-05
Neuron_612	0.000177387	0.000162424	0.000118886	9.52819e-05	8.18186e-05	7.49211e-05	7.49494e-05	9.42247e-05	8.397e-05	0.000105648	7.43166e-05	7.85067e-05	7.13097e-05	8.46059e-05	7.62695e-05	7.57903e-05	9.22547e-05	0.000144	7.5607e-05	7.49217e-05	9.01767e-05	9.27111e-05	9.8461e-05	9.70889e-05	8.8188e-05	7.12188e-05	9.75291e-05	8.37603e-05	0.000143739	9.65469e-05	8.23395e-05	9.88134e-05	9.87746e-05	6.16564e-05	7.20215e-05	7.50463e-05	6.5787e-05	7.94126e-05	7.30933e-05	7.37516e-05	8.43151e-05	8.67778e-05	7.80238e-05	9.07538e-05	9.96852e-05	7.00402e-05	7.76223e-05	8.68954e-05	9.40409e-05
Neuron_613	0.00026689	0.000232031	0.000208318	0.000170921	0.000169486	0.000161739	0.000176135	0.000187099	0.000171679	0.000224367	0.000188781	0.000178468	0.000153213	0.000175764	0.000146395	0.000148019	0.000178476	0.00022527	0.000142612	0.000150515	0.000150944	0.000187177	0.000168774	0.000190905	0.00016523	0.0001403	0.000167886	0.000150124	0.000231329	0.000165439	0.00014246	0.00017984	0.000170051	0.000126904	0.000150259	0.000145475	0.000135553	0.000148002	0.00012581	0.00014111	0.000149785	0.000192809	0.00016562	0.000160495	0.000169763	0.000156149	0.000154138	0.00014619	0.000161462
Neuron_614	0.00019308	0.000171447	0.000145147	0.000133589	0.000118163	0.00011844	0.000122062	0.000115698	0.000104915	0.000131422	0.000127162	0.000114182	0.000101225	0.000130025	0.000137385	0.000119674	0.000131142	0.000164956	0.000128837	0.00012286	0.000107757	0.000117061	0.000131253	0.000140882	0.000126589	0.000108818	0.000143641	0.000104044	0.000163225	0.000122509	0.00010774	0.000122808	0.000117392	0.000109988	0.000121168	0.000110775	0.000100708	0.000111517	0.000112463	0.000108545	0.000131451	0.000158118	0.000125515	0.000109796	0.000119054	0.000111357	0.000105145	0.000108368	0.000113762
Neuron_615	0.000142934	0.000130346	9.88192e-05	7.37812e-05	6.22513e-05	7.17353e-05	7.30591e-05	8.13505e-05	7.68516e-05	8.87615e-05	6.56895e-05	7.24808e-05	6.87851e-05	7.75566e-05	7.01377e-05	7.62036e-05	7.21915e-05	0.000100398	5.94754e-05	6.51995e-05	7.91468e-05	6.77795e-05	7.2699e-05	6.72032e-05	7.66876e-05	7.10088e-05	8.71208e-05	7.12538e-05	7.73284e-05	7.82742e-05	6.70953e-05	7.3834e-05	6.39225e-05	6.6226e-05	6.91047e-05	6.85336e-05	5.65081e-05	6.9324e-05	6.49297e-05	7.30735e-05	6.97405e-05	8.28282e-05	6.82998e-05	7.27797e-05	7.19407e-05	6.12782e-05	5.95784e-05	6.65497e-05	7.54831e-05
Neuron_616	0.000228314	0.000209283	0.00012781	0.000125819	0.000106048	0.00011452	0.000100723	0.000123226	0.000108055	0.000120139	0.000101227	0.000107015	0.000114154	0.000117994	0.000105456	0.0001079	9.87115e-05	0.000166267	8.32388e-05	8.9874e-05	0.000110497	9.87565e-05	0.000110138	0.000118712	0.0001352	0.000114652	0.000141967	0.000130718	0.000144867	0.000133021	0.000121447	0.000117757	9.82059e-05	0.000104124	0.000106624	0.000105727	7.99602e-05	0.000115838	0.000107744	0.000103016	0.000118008	0.000139924	0.000124412	0.000104587	0.00010946	0.000101001	9.94668e-05	0.000111046	0.000114078
Neuron_617	0.000196931	0.000149438	0.000118136	0.00010046	8.57619e-05	9.21986e-05	9.1895e-05	0.000104766	9.80344e-05	0.000124897	0.000102236	0.000106036	8.98221e-05	0.000105573	8.5796e-05	8.92577e-05	9.56897e-05	0.000132347	8.14857e-05	8.48831e-05	9.39225e-05	9.80707e-05	9.56414e-05	0.000134108	0.000100281	8.86887e-05	0.000116642	8.40126e-05	0.000125976	0.000104949	8.73661e-05	8.97022e-05	9.66408e-05	8.22398e-05	9.73327e-05	8.63931e-05	8.28155e-05	9.9753e-05	9.25033e-05	8.03905e-05	9.71903e-05	0.000101565	7.93342e-05	9.01636e-05	0.000101429	8.09808e-05	8.1249e-05	8.71733e-05	9.71961e-05
Neuron_618	0.000120074	9.63587e-05	7.69261e-05	6.95507e-05	7.14168e-05	6.23931e-05	6.80522e-05	7.11927e-05	6.04802e-05	7.33992e-05	6.35511e-05	6.83252e-05	7.13565e-05	7.71515e-05	7.01457e-05	6.67289e-05	7.45958e-05	0.000101471	6.41188e-05	6.49123e-05	6.3994e-05	7.10945e-05	7.50459e-05	8.67537e-05	7.3844e-05	5.94298e-05	7.88087e-05	6.25901e-05	0.00012904	7.73029e-05	6.59951e-05	8.64992e-05	8.25956e-05	6.29868e-05	7.2659e-05	6.89245e-05	6.50059e-05	6.65626e-05	6.80615e-05	6.56944e-05	8.41935e-05	7.4629e-05	7.16765e-05	7.49347e-05	8.50558e-05	6.54517e-05	6.70847e-05	7.13358e-05	7.24198e-05
Neuron_619	0.000216099	0.000206198	0.000158499	0.000170342	0.000147747	0.000156508	0.00013498	0.000136404	0.000126141	0.000134047	0.000133551	0.000128095	0.000132196	0.000142343	0.000155191	0.000142541	0.000145611	0.000159478	0.000136432	0.000129793	0.000118345	0.000135047	0.000133778	0.000154632	0.000137605	0.00013951	0.000147213	0.000122402	0.000140758	0.000131393	0.000131515	0.000126997	0.000116438	0.000111041	0.000119866	0.000125346	0.000102557	0.000147466	0.000144018	0.000128229	0.0001685	0.00018168	0.000131387	0.000133916	0.000128091	0.00013483	0.000131394	0.000141872	0.000136959
Neuron_620	0.000151002	0.000136795	0.000116121	0.000100139	8.79986e-05	8.87427e-05	7.75929e-05	9.46939e-05	8.38207e-05	0.000107381	8.43451e-05	7.95108e-05	7.72214e-05	9.32288e-05	8.07876e-05	8.10561e-05	0.00010399	0.000154048	8.99464e-05	8.34214e-05	9.07722e-05	9.52775e-05	0.000106965	0.000111175	9.70776e-05	7.70562e-05	9.27272e-05	7.01834e-05	0.0001198	8.80206e-05	8.87165e-05	9.64488e-05	8.17836e-05	6.07762e-05	8.39963e-05	7.51817e-05	7.70699e-05	0.000101486	8.35387e-05	8.27392e-05	9.82981e-05	0.00010338	9.21264e-05	9.01898e-05	0.000114731	7.8953e-05	8.32426e-05	9.1426e-05	9.26387e-05
Neuron_621	0.000184087	0.000167842	0.000115699	0.000112771	9.62681e-05	0.000100915	9.23771e-05	0.000107565	9.82333e-05	0.000103558	8.84489e-05	8.67628e-05	9.93161e-05	9.98594e-05	0.000106329	0.000101869	9.45228e-05	0.000139618	8.67656e-05	9.30837e-05	9.72967e-05	8.75073e-05	8.76793e-05	9.28406e-05	9.62584e-05	9.46636e-05	0.000124818	0.000103889	0.00012698	0.000115308	9.85442e-05	0.000100951	9.71983e-05	8.84635e-05	9.06703e-05	8.82302e-05	6.9788e-05	9.21433e-05	8.79986e-05	8.93932e-05	0.000117182	0.000119419	9.31638e-05	9.60298e-05	8.98537e-05	7.68899e-05	7.56675e-05	9.22927e-05	9.75544e-05
Neuron_622	0.000166889	0.000122026	9.14815e-05	8.15608e-05	8.02205e-05	9.68954e-05	8.26798e-05	0.000101644	9.30048e-05	0.00010108	9.72759e-05	9.30353e-05	7.66649e-05	9.8582e-05	9.36387e-05	9.06518e-05	9.09851e-05	0.00015216	7.46898e-05	9.50224e-05	6.30523e-05	9.88023e-05	0.000114941	0.000120705	9.28379e-05	9.56039e-05	8.27964e-05	8.12034e-05	0.000129093	9.71101e-05	7.26782e-05	7.69902e-05	8.1572e-05	7.00116e-05	9.11938e-05	7.12238e-05	7.48298e-05	9.53345e-05	7.34569e-05	7.572e-05	8.29953e-05	0.000111622	8.63014e-05	7.84838e-05	0.000106727	8.96979e-05	8.27499e-05	8.0927e-05	7.98762e-05
Neuron_623	0.000139662	0.000103798	8.44893e-05	7.96848e-05	7.72681e-05	8.13159e-05	8.07407e-05	8.27266e-05	7.27874e-05	7.36027e-05	7.79107e-05	7.66032e-05	8.26659e-05	8.01767e-05	8.50314e-05	7.96071e-05	8.73521e-05	0.000135619	7.78469e-05	7.08316e-05	6.43534e-05	7.12106e-05	7.73739e-05	8.9817e-05	8.57833e-05	7.80528e-05	9.02351e-05	7.61434e-05	0.000107809	9.48852e-05	8.18445e-05	9.36302e-05	8.11979e-05	7.32032e-05	8.31032e-05	7.08258e-05	5.90152e-05	7.76934e-05	8.45565e-05	7.35913e-05	0.000107342	0.000105711	8.58078e-05	7.33823e-05	8.97217e-05	7.47846e-05	7.325e-05	8.22715e-05	7.47532e-05
Neuron_624	0.000114652	0.000107851	8.75507e-05	8.71861e-05	7.59248e-05	8.57443e-05	7.61371e-05	8.59624e-05	7.22109e-05	8.86852e-05	7.52888e-05	6.98071e-05	6.46174e-05	6.77783e-05	8.09846e-05	7.85814e-05	8.50715e-05	0.000119681	8.67009e-05	8.20977e-05	8.24512e-05	8.60048e-05	0.000102916	9.61697e-05	9.21729e-05	7.82801e-05	9.44884e-05	6.93496e-05	0.00012856	7.95947e-05	7.51846e-05	9.49708e-05	8.40493e-05	7.05405e-05	8.39344e-05	8.56452e-05	6.97548e-05	7.37739e-05	7.00468e-05	8.05796e-05	9.67073e-05	0.000116801	7.56198e-05	7.72221e-05	9.50616e-05	7.51064e-05	6.8573e-05	8.69712e-05	8.90739e-05
Neuron_625	0.000112858	9.32418e-05	8.01915e-05	7.0933e-05	6.23113e-05	6.17884e-05	6.24267e-05	6.36308e-05	5.85534e-05	7.58604e-05	6.45266e-05	6.54438e-05	6.63061e-05	6.6914e-05	6.47568e-05	6.38834e-05	7.2384e-05	8.02797e-05	5.67192e-05	5.54901e-05	6.09642e-05	6.62216e-05	6.85633e-05	7.36243e-05	6.65155e-05	5.98735e-05	7.26115e-05	5.73161e-05	7.44364e-05	6.67234e-05	6.14329e-05	6.30672e-05	5.97488e-05	5.31735e-05	5.38706e-05	5.01721e-05	4.77265e-05	5.35397e-05	5.34479e-05	4.96941e-05	5.7914e-05	6.53414e-05	5.99498e-05	7.10965e-05	7.22856e-05	5.68247e-05	5.51613e-05	5.70811e-05	6.88387e-05
Neuron_626	0.000168303	0.000138218	9.30588e-05	9.46787e-05	8.50052e-05	8.08107e-05	7.72346e-05	8.77283e-05	7.4328e-05	9.78811e-05	8.01355e-05	7.20515e-05	8.08858e-05	8.3148e-05	7.72064e-05	8.01978e-05	7.56082e-05	0.000127769	6.6298e-05	7.61591e-05	8.29974e-05	7.889e-05	8.69156e-05	9.1728e-05	7.97635e-05	7.92932e-05	8.56633e-05	8.46567e-05	0.000129153	9.65511e-05	8.73168e-05	0.000101471	9.44409e-05	8.31011e-05	7.2715e-05	8.98667e-05	7.23667e-05	8.33472e-05	7.85495e-05	8.8874e-05	9.2975e-05	9.69328e-05	8.9873e-05	8.35699e-05	8.39812e-05	7.65276e-05	7.91109e-05	9.36601e-05	8.8732e-05
Neuron_627	8.08114e-05	6.1292e-05	4.69972e-05	4.64987e-05	4.04801e-05	3.91183e-05	3.94957e-05	4.30343e-05	4.08801e-05	4.68415e-05	4.29659e-05	3.88395e-05	3.82912e-05	4.34876e-05	4.14826e-05	4.02198e-05	4.32533e-05	7.24467e-05	3.51969e-05	3.62053e-05	3.42398e-05	4.06727e-05	4.85083e-05	5.8484e-05	4.0283e-05	3.66308e-05	5.35175e-05	4.28213e-05	6.31059e-05	4.98543e-05	4.22693e-05	4.95275e-05	4.57449e-05	4.32275e-05	4.45983e-05	3.67499e-05	3.78004e-05	3.7534e-05	4.14217e-05	3.83331e-05	5.11699e-05	5.19788e-05	4.68821e-05	4.36122e-05	4.87542e-05	3.52184e-05	3.64429e-05	3.90552e-05	4.20083e-05
Neuron_628	0.000230985	0.000214103	0.000165887	0.000160257	0.000143909	0.00015155	0.000138649	0.000143666	0.00013355	0.000137408	0.000134318	0.000131151	0.000137126	0.000138068	0.000163227	0.000156934	0.000157432	0.000234065	0.000146935	0.000135411	0.000126397	0.000130789	0.000133422	0.000142738	0.000148721	0.000139294	0.000167123	0.000139432	0.000176414	0.000165476	0.000150522	0.000141489	0.000132762	0.00012718	0.00014614	0.000139485	0.000112842	0.000147735	0.000154032	0.000141052	0.000186431	0.0002011	0.000158968	0.000135014	0.000159028	0.000137552	0.000134458	0.000149959	0.000139377
Neuron_629	0.000253982	0.000196541	0.00015547	0.000147561	0.000135888	0.000140987	0.000152689	0.000157189	0.000148521	0.000161341	0.000149292	0.000149495	0.000165666	0.000174008	0.000172121	0.000147756	0.000148098	0.000208241	0.00013433	0.000145287	0.000135431	0.000140959	0.000164853	0.000175083	0.000158388	0.000146659	0.0001947	0.000159028	0.000170764	0.000170548	0.000156868	0.000180821	0.000174768	0.000139909	0.000157089	0.000141483	0.000131005	0.000147568	0.000149399	0.000127061	0.000193012	0.000154087	0.000144331	0.0001392	0.000149094	0.00012884	0.00012458	0.000143231	0.000147694
Neuron_630	0.000212107	0.000143868	0.000107117	0.000119409	0.000109125	0.000101685	8.57802e-05	0.000111077	8.41738e-05	0.000104539	8.78547e-05	8.44227e-05	9.38022e-05	9.74658e-05	0.00010398	0.000103957	9.51842e-05	0.000129683	0.000110094	9.75668e-05	0.000113309	0.000117783	0.00012942	0.000135234	0.000113148	9.84401e-05	0.000116501	9.44162e-05	0.000159773	9.93784e-05	9.74674e-05	0.000123184	9.46141e-05	0.000100864	9.69076e-05	0.000102121	8.47095e-05	8.95141e-05	8.93507e-05	9.98031e-05	0.000107279	0.000120521	9.83195e-05	0.00012072	0.00013892	0.000108639	9.81431e-05	0.000109164	0.000108592
Neuron_631	0.000213985	0.00018082	0.000152853	0.000138643	0.00014127	0.000146156	0.000144756	0.000158345	0.000133904	0.000160677	0.00015036	0.000131277	0.000135843	0.0001532	0.000138179	0.0001334	0.00015298	0.000206482	0.000123491	0.00012697	0.000114768	0.000131997	0.000143139	0.000167165	0.00015414	0.000138506	0.000156786	0.000141519	0.000197762	0.00015494	0.000135944	0.000162696	0.000140786	0.000137474	0.000155422	0.000142638	0.000120721	0.000136928	0.000131598	0.000135617	0.000164204	0.000174761	0.000148494	0.000122057	0.000140556	0.000139201	0.000123225	0.000121783	0.000129212
Neuron_632	0.000259597	0.000199025	0.000142833	0.000122717	0.00011361	0.000108253	0.000110862	0.000119775	9.86204e-05	0.000135983	0.00011881	0.000106631	0.000103581	0.000125604	0.000116606	0.000114607	0.000120761	0.000167536	9.46628e-05	0.000105288	0.000104168	0.000107716	0.0001158	0.000146854	0.000117285	0.000114614	0.000132564	0.000109363	0.000150443	0.000143473	0.000110151	0.000115359	0.000121883	0.000117959	0.000101793	0.000101832	9.54318e-05	0.000112308	0.000120652	0.000106217	0.000153532	0.000155463	0.000120957	0.000124641	0.000122503	9.73128e-05	9.71536e-05	0.000112854	0.000120247
Neuron_633	0.000236084	0.000203487	0.000175128	0.000184061	0.000180131	0.000173355	0.000158467	0.000169686	0.00014399	0.000170836	0.000159325	0.000146813	0.000173848	0.000178516	0.000178638	0.000168747	0.000187936	0.000204082	0.000159575	0.000156341	0.000146867	0.000178381	0.000168646	0.000163828	0.000157055	0.000149113	0.000160389	0.000133511	0.000177124	0.000175108	0.000144585	0.000143363	0.000141542	0.000149798	0.000153723	0.000157326	0.000130564	0.000147205	0.000146273	0.000143676	0.000179399	0.000178735	0.000148646	0.000173399	0.000167186	0.000159001	0.000150436	0.000156415	0.000153452
Neuron_634	0.0002905	0.000240017	0.000177866	0.000165144	0.000150829	0.000154725	0.000160478	0.000172881	0.000160308	0.000174397	0.000157359	0.000159661	0.000174903	0.00018561	0.00016991	0.000157916	0.000165986	0.000223562	0.000143806	0.000156251	0.000149952	0.000152502	0.000186178	0.000180884	0.00018668	0.000165484	0.000209123	0.000179281	0.000190725	0.000175929	0.000163374	0.000192831	0.000180545	0.000142804	0.000173893	0.00016002	0.00014074	0.000162256	0.000151885	0.000149367	0.0001927	0.000178896	0.000166686	0.000144929	0.000164198	0.000137055	0.000135113	0.000149963	0.000159217
Neuron_635	0.000106306	9.66107e-05	7.74005e-05	6.02244e-05	5.89186e-05	5.20329e-05	6.24815e-05	6.40175e-05	6.08379e-05	7.66493e-05	6.15471e-05	6.62292e-05	6.64093e-05	6.95578e-05	6.28617e-05	6.0554e-05	7.2508e-05	0.000130151	6.21262e-05	6.07521e-05	5.97774e-05	5.82966e-05	7.32903e-05	0.000110212	7.65166e-05	6.15097e-05	7.65855e-05	6.10104e-05	7.44853e-05	6.52533e-05	6.96126e-05	8.37573e-05	6.83847e-05	4.63355e-05	7.52862e-05	5.73039e-05	5.82022e-05	7.39275e-05	6.60623e-05	5.79944e-05	9.13053e-05	6.66981e-05	6.78542e-05	5.85695e-05	7.84774e-05	5.25591e-05	5.33585e-05	5.74746e-05	6.57322e-05
Neuron_636	0.000229041	0.000204742	0.000141553	0.000133495	0.000118605	0.000122414	0.000113499	0.000129884	0.000123197	0.000136812	0.000129763	0.000128269	0.000133328	0.000135764	0.000134561	0.000125724	0.000124577	0.000155768	9.96006e-05	0.000107329	0.000120299	0.000119658	0.000132008	0.000148634	0.000135488	0.000145664	0.000141162	0.000129243	0.000175029	0.000172334	0.000128973	0.000135045	0.000137023	0.0001198	0.000106913	0.000108158	9.42692e-05	0.000135056	0.000123025	0.000109414	0.000151021	0.000176894	0.000116679	0.000141427	0.000134119	0.000118022	0.000110789	0.000128613	0.000138734
Neuron_637	0.0002151	0.000164956	0.000140465	0.000121109	0.000107916	0.000102494	0.000103931	0.000115944	0.000102185	0.000139001	0.000106804	0.000114157	0.000112156	0.000129276	0.00010959	0.000105506	0.000107118	0.000136081	0.000109521	0.000107027	0.000119111	0.000115726	0.000111211	0.000126321	0.000118219	0.000104619	0.000112346	9.7791e-05	0.000159738	0.000116319	0.000112978	0.000110436	0.000115221	9.15988e-05	9.08955e-05	8.88976e-05	8.93014e-05	0.000119663	0.000102254	0.000102611	0.000118673	0.000118512	0.000102197	0.000104317	0.000130313	9.73743e-05	0.000102702	0.000120403	0.000112846
Neuron_638	0.000124081	8.39834e-05	6.76123e-05	6.63855e-05	6.44407e-05	6.24428e-05	6.63431e-05	6.90212e-05	6.66438e-05	6.57129e-05	7.20322e-05	6.02973e-05	7.05858e-05	7.31015e-05	7.3652e-05	7.2953e-05	7.52699e-05	0.00011041	6.54724e-05	6.2088e-05	6.35927e-05	6.58989e-05	7.79769e-05	8.15348e-05	6.67196e-05	6.2336e-05	7.13127e-05	5.74656e-05	8.49565e-05	7.0947e-05	6.65227e-05	6.8548e-05	6.50044e-05	6.60421e-05	7.29478e-05	5.96874e-05	5.43789e-05	6.67414e-05	7.04691e-05	6.03697e-05	7.32579e-05	6.29953e-05	6.54709e-05	6.98456e-05	7.22777e-05	6.32605e-05	5.64646e-05	6.64215e-05	5.84996e-05
Neuron_639	0.000204014	0.000174616	0.00014542	0.000117068	0.000124064	0.000122994	0.000133386	0.000134932	0.000117177	0.000147657	0.000132262	0.000122601	0.000123962	0.000130003	0.000114373	0.00012063	0.000122888	0.000149746	0.000109311	0.00011313	0.000116461	0.000129054	0.000131035	0.000141792	0.000129715	0.000116912	0.000136905	0.000120219	0.000153842	0.000134452	0.00011343	0.000131957	0.000119528	0.000114301	0.000121781	0.00011787	0.00010332	0.00011223	0.000114388	0.000115698	0.000134308	0.000137114	0.000117273	0.000110127	0.000126165	0.000115883	0.000111785	0.000110039	0.000113778
Neuron_640	0.000193521	0.000176719	0.000139636	0.000124482	0.000112293	0.0001284	0.000114481	0.000132729	0.000119308	0.000126291	0.000117301	0.000111588	0.000117754	0.000140458	0.000140011	0.000126942	0.000118335	0.000162802	0.000108395	0.000120313	0.000112604	0.000131699	0.000148311	0.000143281	0.000121824	0.000124558	0.000137298	0.000112847	0.000154819	0.000139819	0.000127871	0.000131476	0.00012424	0.000120951	0.000105847	0.000114456	0.000102735	0.000130818	0.000120357	0.000108066	0.00015207	0.000136596	0.000115827	0.000120875	0.00012188	0.000115115	9.89749e-05	0.00011097	0.000113509
Neuron_641	0.000197758	0.00015911	0.000143004	0.000124255	0.000113773	0.000113432	0.000115552	0.000126231	0.000118063	0.000147317	0.000128765	0.000125162	0.00012556	0.000141815	0.000130627	0.000119325	0.000129739	0.00017326	0.000112026	0.000113291	0.000118151	0.00013069	0.000131999	0.000146658	0.000138439	0.000128205	0.000136475	0.000118854	0.000204514	0.000154776	0.000119555	0.000128987	0.000130918	9.88264e-05	0.000109154	0.000103407	0.000100652	0.000123885	0.000108341	9.92505e-05	0.00013289	0.000155128	0.00010836	0.000122343	0.000137776	0.000112266	0.000111082	0.000125084	0.000130204
Neuron_642	0.000178314	0.000136452	9.56034e-05	8.79613e-05	7.98415e-05	7.39981e-05	8.62475e-05	8.48212e-05	8.27735e-05	9.50286e-05	8.46518e-05	8.46108e-05	9.94176e-05	0.000101207	9.67753e-05	8.56513e-05	8.59328e-05	0.000125454	7.61136e-05	7.65723e-05	8.34843e-05	7.4267e-05	9.49494e-05	0.000111703	9.10234e-05	8.68587e-05	0.000115807	9.91879e-05	9.71892e-05	0.000113988	9.49875e-05	0.000106429	0.000100683	8.06149e-05	8.84369e-05	7.72053e-05	7.72419e-05	8.65373e-05	9.0825e-05	6.93732e-05	0.000134684	8.33225e-05	7.95108e-05	8.97527e-05	8.91216e-05	6.66045e-05	6.61696e-05	7.59952e-05	8.6525e-05
Neuron_643	0.000156917	0.000125749	9.96905e-05	9.56145e-05	9.09725e-05	8.57802e-05	8.75754e-05	9.44933e-05	7.98416e-05	9.59532e-05	8.91197e-05	8.62144e-05	9.62827e-05	9.85277e-05	9.84531e-05	8.81091e-05	8.52068e-05	0.000125119	8.97893e-05	8.40909e-05	8.8696e-05	9.0139e-05	0.000109817	0.000101815	9.78974e-05	8.70581e-05	0.000103473	8.98455e-05	0.000111097	0.000101244	9.13022e-05	0.000107778	0.000102893	8.77011e-05	8.8312e-05	8.04357e-05	7.15523e-05	8.19557e-05	8.73106e-05	7.73123e-05	9.7431e-05	9.29991e-05	8.80818e-05	9.82637e-05	9.13836e-05	8.31048e-05	7.25979e-05	8.091e-05	8.40773e-05
Neuron_644	0.000219126	0.000180209	0.00012717	0.000115749	0.000117566	0.000116874	0.000106611	0.000121118	0.000100106	0.000113399	0.000100589	0.000102521	9.91761e-05	0.000103469	0.000112698	0.000117513	0.000109334	0.000159038	9.94055e-05	9.43889e-05	0.00010798	0.000106599	0.000112825	0.000116155	0.000134308	0.000111978	0.000135906	0.000118621	0.000128577	0.000119223	0.000111459	0.000119469	9.90348e-05	0.000100048	0.00010774	0.000106411	7.91429e-05	0.0001041	0.000107543	0.000101282	0.000119686	0.000133786	0.000117808	9.40725e-05	0.000120289	0.00010751	0.000100981	0.000105525	0.0001001
Neuron_645	0.000187355	0.000171294	0.000125596	0.000115855	0.000113036	0.000108348	0.000106086	0.000118799	0.000108965	0.0001386	0.000115422	0.000111817	0.000106582	0.00011146	0.000105018	0.000107285	0.000121017	0.00014377	9.14822e-05	9.41755e-05	0.0001056	0.000114325	0.0001137	0.000116385	0.00011959	9.3182e-05	0.00011655	0.000110207	0.000139968	0.000114099	9.26689e-05	0.000112925	0.00010338	9.74493e-05	0.000101712	0.000101808	9.01533e-05	8.75819e-05	9.45845e-05	0.000102841	0.000100086	0.000133809	0.000120986	0.000121626	0.000118806	0.000106913	0.000101408	0.000107129	0.00011557
Neuron_646	0.000246826	0.000217357	0.000167675	0.00013127	0.000128868	0.000135392	0.000147699	0.000159043	0.000155519	0.000162529	0.000133196	0.000142474	0.000136688	0.000149448	0.000153202	0.000146496	0.000141289	0.000205567	0.000128335	0.000146566	0.000140441	0.000140092	0.000166907	0.000148171	0.000153028	0.000141659	0.000190683	0.00014693	0.000169238	0.000145194	0.000128957	0.000175455	0.00015849	0.000117697	0.000146303	0.000137886	0.000117678	0.000137609	0.000114175	0.000140789	0.000155587	0.000154632	0.000126291	0.000128711	0.000134229	0.000117673	0.000109566	0.000121912	0.000133376
Neuron_647	0.000217072	0.000166593	0.000139944	0.000119159	0.00011161	0.000122272	0.000125409	0.000125474	0.000108394	0.000149821	0.00013066	0.000123621	0.000101226	0.000133473	0.000122172	0.000116818	0.000117817	0.000159509	0.000110837	0.000125323	0.000106766	0.000120998	0.000138906	0.000136188	0.000118051	0.000116338	0.000112829	0.000105046	0.000159911	0.000118369	9.76031e-05	0.000112301	0.000112646	0.000104098	0.000103985	9.70266e-05	8.95031e-05	9.77911e-05	9.13355e-05	0.000105803	0.000115508	0.000140685	0.000110486	9.9168e-05	0.000117308	0.000103387	9.05435e-05	0.00010064	0.000100892
Neuron_648	0.000207984	0.000157425	0.000111789	9.88305e-05	9.49806e-05	8.99179e-05	8.62531e-05	9.91675e-05	8.11818e-05	9.89985e-05	8.88097e-05	9.17734e-05	8.82829e-05	0.000101183	0.000110287	0.00010599	9.94392e-05	0.000129332	7.85404e-05	9.06876e-05	7.8111e-05	8.94115e-05	9.37359e-05	0.00011723	0.000103174	8.6555e-05	0.000111682	9.77794e-05	0.00012136	8.92099e-05	8.34426e-05	8.88692e-05	9.57862e-05	7.82238e-05	0.000100057	9.7682e-05	8.6507e-05	9.10188e-05	9.34945e-05	8.9384e-05	9.33679e-05	0.000103927	8.75803e-05	8.42311e-05	0.00010181	8.01251e-05	8.76795e-05	9.41782e-05	9.14496e-05
Neuron_649	0.000195019	0.000156881	0.000131642	0.000142761	0.000119576	0.000116856	0.000112374	0.000124346	0.000112	0.000124358	0.000118088	0.000103119	0.000113236	0.000132821	0.00012414	0.000108768	0.000126412	0.000173287	0.000120451	0.000117522	0.000105957	0.000118047	0.000126897	0.000162853	0.000120817	0.000107571	0.000133049	0.000107864	0.000149974	0.000121018	0.000117069	0.000133104	0.000115246	0.000110175	0.0001222	0.00011298	0.000104745	0.000121245	0.00011799	0.000104144	0.000146326	0.000155966	0.000125607	0.000121307	0.000117448	0.000113621	0.000108393	0.00011104	0.00011686
Neuron_650	0.000221704	0.000185127	0.000156347	0.000118843	0.000101467	0.000112965	0.000111957	0.00011423	9.74959e-05	0.000132195	0.000112561	0.000113219	0.000103298	0.000121829	0.000116535	0.000112017	0.000116119	0.000151465	0.000106822	0.000107986	0.000108586	0.000107607	0.000116039	0.000140568	0.000117878	0.000100967	0.000134266	9.92604e-05	0.000133154	0.000125573	0.000104164	0.000103185	0.00010442	9.55898e-05	0.000102904	9.80527e-05	9.449e-05	0.000111987	0.000110465	9.72633e-05	0.000131943	0.000115544	9.24274e-05	0.00011187	0.000101022	8.35904e-05	8.95929e-05	0.00011132	0.00012284
Neuron_651	0.000256659	0.000179723	0.000141404	0.000110523	0.000100887	8.53467e-05	9.87019e-05	0.000105011	9.54324e-05	0.000122466	0.000107712	0.000105106	0.000106258	0.000123553	0.000109178	0.000109846	0.000130046	0.000176725	0.000103727	0.000105566	9.30039e-05	0.000112251	0.000110208	0.000157529	9.67047e-05	7.69758e-05	0.000123779	8.74081e-05	0.000166639	0.000117899	0.00011191	0.000122847	0.000140453	0.000101742	0.000120024	0.000100065	0.000101021	0.000105091	0.000116179	9.50302e-05	0.000127585	0.00010721	9.96872e-05	0.000113908	0.000126636	8.97411e-05	0.000101711	0.000115268	0.000120978
Neuron_652	0.000231132	0.000198268	0.000143275	0.000125746	0.000113921	0.000118521	0.000114059	0.000127878	0.000130448	0.000135371	0.000113103	0.000122239	0.00012087	0.000139164	0.000135005	0.000125509	0.000116266	0.000202786	0.000109191	0.000114971	0.000118148	0.00011327	0.000123157	0.000178823	0.000141135	0.000117549	0.000156947	0.000130957	0.000128866	0.000133344	0.000129348	0.000141858	0.000126932	0.000114448	0.000132491	0.000118244	0.000112602	0.000132168	0.000131729	0.000120273	0.000157479	0.000149679	0.000132399	0.000130654	0.000134273	0.000113785	0.000108116	0.000117607	0.000130373
Neuron_653	0.000118259	0.000108823	7.18636e-05	7.31633e-05	6.78315e-05	6.47275e-05	6.24867e-05	6.48588e-05	6.41021e-05	8.07987e-05	7.6215e-05	6.7726e-05	6.28233e-05	7.48375e-05	6.9754e-05	6.9337e-05	6.82564e-05	9.05602e-05	6.40798e-05	6.58612e-05	7.10964e-05	7.10368e-05	7.62994e-05	8.04339e-05	7.3133e-05	6.36479e-05	8.78785e-05	7.52028e-05	9.80419e-05	8.36284e-05	6.41322e-05	7.15394e-05	6.3338e-05	7.20703e-05	6.48545e-05	6.20081e-05	5.34183e-05	5.89914e-05	6.75627e-05	6.49255e-05	7.85841e-05	9.12243e-05	7.24957e-05	7.58265e-05	6.82445e-05	6.31437e-05	5.55962e-05	6.00232e-05	7.08593e-05
Neuron_654	0.000147931	0.000130484	9.44169e-05	8.14363e-05	8.14844e-05	8.09845e-05	7.89651e-05	9.61911e-05	7.58428e-05	8.99081e-05	8.12305e-05	7.65985e-05	8.36737e-05	8.48688e-05	7.63633e-05	7.86542e-05	8.493e-05	0.000103147	6.72274e-05	7.64534e-05	7.624e-05	8.24555e-05	9.33799e-05	9.08107e-05	9.15266e-05	8.65462e-05	9.41631e-05	8.53098e-05	0.000105356	9.84542e-05	8.18134e-05	0.000103918	9.52531e-05	7.24236e-05	8.14174e-05	8.48804e-05	6.89929e-05	8.42292e-05	7.04993e-05	7.66133e-05	9.23988e-05	8.95991e-05	8.27855e-05	7.45045e-05	9.20957e-05	7.56271e-05	7.69873e-05	8.82867e-05	8.83667e-05
Neuron_655	0.000111052	9.80133e-05	8.24414e-05	7.46357e-05	6.30429e-05	7.21369e-05	6.30001e-05	7.09712e-05	7.26534e-05	7.21559e-05	7.34863e-05	6.47694e-05	7.17867e-05	8.13636e-05	7.53887e-05	7.04894e-05	7.90627e-05	0.00012792	7.01523e-05	7.42937e-05	5.87322e-05	7.06215e-05	8.38988e-05	0.000117992	7.58585e-05	7.49622e-05	8.28841e-05	6.72924e-05	0.000103973	8.11804e-05	7.67929e-05	7.42745e-05	6.761e-05	6.56659e-05	7.76601e-05	6.84778e-05	6.2499e-05	8.30996e-05	7.79045e-05	6.31801e-05	0.00010256	9.60939e-05	7.52215e-05	6.66479e-05	6.95744e-05	6.47472e-05	6.05969e-05	6.54459e-05	6.97938e-05
Neuron_656	0.000148433	0.000122614	0.000108088	8.51282e-05	7.83484e-05	7.1544e-05	7.63425e-05	8.45254e-05	7.30665e-05	0.000101709	8.01082e-05	8.63262e-05	8.50708e-05	0.000104121	8.19011e-05	7.55048e-05	8.79468e-05	9.34453e-05	6.83548e-05	6.95965e-05	7.25638e-05	7.77704e-05	7.07805e-05	9.27842e-05	8.72152e-05	7.54379e-05	7.8755e-05	6.70525e-05	0.000109419	8.19522e-05	7.45756e-05	6.93274e-05	7.72276e-05	6.38221e-05	6.34641e-05	6.37698e-05	6.23068e-05	8.41295e-05	6.76467e-05	6.53068e-05	8.56972e-05	9.09752e-05	7.92263e-05	7.19805e-05	9.13065e-05	6.42164e-05	7.33621e-05	8.71435e-05	8.45927e-05
Neuron_657	0.000169108	0.000145553	0.00011027	9.24973e-05	8.62513e-05	9.56215e-05	8.48962e-05	9.98547e-05	8.7156e-05	9.64941e-05	9.34375e-05	9.09392e-05	7.44796e-05	9.16828e-05	9.73094e-05	9.5617e-05	9.74572e-05	0.00012117	8.26151e-05	8.7555e-05	7.56098e-05	9.99149e-05	0.000102166	9.82263e-05	8.69047e-05	7.71412e-05	9.13183e-05	7.61797e-05	9.73183e-05	8.11254e-05	6.97403e-05	8.33323e-05	7.56261e-05	7.54836e-05	7.46805e-05	7.74669e-05	7.65912e-05	8.45152e-05	6.7538e-05	8.5361e-05	9.00618e-05	0.000111671	9.59401e-05	8.75631e-05	8.74174e-05	8.06654e-05	7.3335e-05	7.76678e-05	9.16613e-05
Neuron_658	0.000111441	8.91833e-05	7.64003e-05	5.85348e-05	6.01027e-05	5.17742e-05	6.21933e-05	6.41977e-05	6.26641e-05	7.31941e-05	6.16603e-05	5.74746e-05	6.40117e-05	6.86199e-05	5.81932e-05	5.85824e-05	6.60323e-05	8.17479e-05	5.84824e-05	5.67845e-05	6.17598e-05	6.77411e-05	7.10773e-05	7.82657e-05	6.48442e-05	5.34153e-05	7.46645e-05	5.6552e-05	8.19967e-05	6.12926e-05	5.91383e-05	7.26802e-05	7.15047e-05	4.99687e-05	6.46321e-05	5.55812e-05	5.29354e-05	5.54428e-05	5.3669e-05	4.92645e-05	6.57533e-05	5.769e-05	4.74897e-05	5.64312e-05	6.91097e-05	4.57983e-05	4.98622e-05	5.62072e-05	5.86575e-05
Neuron_659	6.61434e-05	5.72352e-05	4.76412e-05	3.94315e-05	3.4928e-05	3.5922e-05	3.3035e-05	3.46735e-05	2.68182e-05	3.22831e-05	3.17582e-05	3.69752e-05	3.62702e-05	3.24124e-05	3.70278e-05	3.25457e-05	4.12645e-05	5.47071e-05	3.57393e-05	3.67737e-05	3.34677e-05	3.73801e-05	3.83969e-05	4.14533e-05	3.24045e-05	3.20681e-05	3.73019e-05	2.62571e-05	6.07038e-05	3.87862e-05	3.62913e-05	3.75995e-05	3.5689e-05	2.65849e-05	2.78611e-05	2.88761e-05	2.66822e-05	3.02736e-05	3.09912e-05	2.92335e-05	4.18482e-05	4.02974e-05	3.12152e-05	3.73446e-05	3.96309e-05	2.86322e-05	2.96422e-05	3.57494e-05	3.99098e-05
Neuron_660	0.000210321	0.000166711	0.000122049	0.000113985	0.000116303	0.000110854	0.000111758	0.000113558	9.99742e-05	0.000110678	0.00010386	9.70502e-05	0.000105326	0.000107694	0.000100626	0.000110969	0.000103321	0.00017236	9.59902e-05	9.77248e-05	0.000106072	0.000103468	0.000108352	0.000112659	0.000122541	0.000105699	0.000121299	0.000110456	0.000140751	0.000127456	0.000110228	0.000130757	0.000115089	0.000101508	0.000105758	0.000104809	7.85238e-05	0.00010988	0.00010701	0.000103607	0.000121044	0.000115833	0.000104691	8.18283e-05	0.000100063	9.23139e-05	9.14192e-05	9.3477e-05	9.02395e-05
Neuron_661	0.000158495	0.000133147	9.07678e-05	8.16564e-05	7.01485e-05	6.9127e-05	6.85451e-05	8.59435e-05	7.22681e-05	8.74398e-05	6.83652e-05	7.83917e-05	6.88644e-05	7.55977e-05	7.0704e-05	7.40073e-05	8.11676e-05	0.000112052	5.89439e-05	6.64889e-05	6.94871e-05	7.82863e-05	8.53108e-05	9.45411e-05	8.46529e-05	7.36068e-05	9.75959e-05	8.47582e-05	0.000121157	9.40398e-05	7.9616e-05	8.67587e-05	8.91094e-05	6.79163e-05	7.60653e-05	7.34683e-05	6.45557e-05	7.24031e-05	7.13738e-05	7.26502e-05	7.53421e-05	9.39857e-05	8.24693e-05	7.95221e-05	9.4176e-05	6.55813e-05	7.31689e-05	8.23606e-05	8.45527e-05
Neuron_662	0.000177246	0.000153855	0.000119934	9.85128e-05	8.97329e-05	8.69619e-05	9.42541e-05	9.87722e-05	9.43073e-05	0.000114607	9.188e-05	8.6665e-05	8.31568e-05	9.43427e-05	9.05116e-05	9.87314e-05	9.95648e-05	0.000139392	8.52484e-05	8.19266e-05	8.75734e-05	8.41364e-05	8.89167e-05	0.000113358	9.64963e-05	7.93232e-05	0.000119616	9.33049e-05	0.000125536	8.74558e-05	9.04308e-05	0.000104136	0.000101706	8.17778e-05	0.000101464	8.96622e-05	8.13966e-05	8.52101e-05	8.85714e-05	9.31087e-05	9.38039e-05	0.000103582	9.43195e-05	9.27369e-05	0.000103552	8.31392e-05	8.28375e-05	8.51816e-05	9.13709e-05
Neuron_663	0.000316005	0.000229734	0.00020528	0.000196886	0.000195434	0.000187784	0.000185069	0.000195539	0.000158122	0.000195893	0.000172727	0.000168269	0.000152712	0.00016538	0.000163817	0.000171453	0.00019969	0.000243133	0.000178266	0.000170049	0.000173918	0.000201243	0.000206353	0.00020556	0.00019574	0.000167637	0.000205322	0.000160967	0.000235696	0.000178728	0.000161815	0.000218205	0.000206913	0.000185927	0.000190058	0.00018102	0.000151528	0.00015305	0.000167556	0.0001667	0.000173699	0.000188534	0.000172071	0.000198514	0.000204883	0.000197381	0.00017731	0.000171923	0.00017465
Neuron_664	0.000218238	0.000190909	0.000147788	0.000136309	0.000127111	0.000125363	0.000117371	0.000139112	0.000124984	0.000133258	0.00012166	0.000122222	0.000131568	0.000133421	0.000143131	0.000138739	0.000162854	0.00018047	0.000120436	0.000118269	0.000107795	0.000123803	0.000130588	0.000128719	0.000124794	0.000112409	0.000145523	0.000119259	0.000140779	0.000137795	0.000120803	0.000121281	0.000112883	0.000110359	0.000118331	0.000112544	9.8208e-05	0.000109218	0.000117812	0.000107385	0.000151327	0.000157475	0.000148589	0.000136144	0.000144427	0.000117642	0.000106148	0.000127798	0.000137483
Neuron_665	0.000296154	0.00021391	0.000196332	0.000166956	0.00015745	0.000159087	0.00015749	0.000169791	0.000150276	0.000198826	0.000167257	0.000168726	0.00013466	0.000165508	0.000153391	0.000157367	0.000170057	0.000163238	0.00016528	0.000169646	0.000167868	0.00018827	0.00019756	0.000196509	0.000177333	0.000149026	0.000171489	0.000136877	0.00022325	0.000160928	0.000135884	0.000157082	0.000170129	0.000129773	0.000142566	0.000136428	0.000137781	0.000141122	0.000121594	0.00014562	0.000151314	0.000194159	0.000146832	0.00015789	0.000198217	0.00015591	0.00014763	0.000156581	0.000150397
[truncated: 624 more rows]
[truncated: 1 more columns]

## Sheet: SR0.25_β0.1_test0_Acc
Epoch	Train_Accuracy	Test_Accuracy
0	0.192683	0.3971
1	0.485633	0.5501
2	0.650017	0.7029
3	0.714167	0.7319
4	0.745683	0.7504
5	0.744817	0.7339
6	0.748317	0.7512
7	0.7662	0.7388
8	0.758267	0.7165
9	0.73535	0.6798
10	0.734683	0.768
11	0.774583	0.7514
12	0.75905	0.7283
13	0.7374	0.6907
14	0.7199	0.7244
15	0.77015	0.7346
16	0.722317	0.64
17	0.614367	0.5292
18	0.692367	0.7362
[truncated: 31 more rows]

## Sheet: SR0.25_β0.25_test0_Error
	Epoch_0	Epoch_1	Epoch_2	Epoch_3	Epoch_4	Epoch_5	Epoch_6	Epoch_7	Epoch_8	Epoch_9	Epoch_10	Epoch_11	Epoch_12	Epoch_13	Epoch_14	Epoch_15	Epoch_16	Epoch_17	Epoch_18	Epoch_19	Epoch_20	Epoch_21	Epoch_22	Epoch_23	Epoch_24	Epoch_25	Epoch_26	Epoch_27	Epoch_28	Epoch_29	Epoch_30	Epoch_31	Epoch_32	Epoch_33	Epoch_34	Epoch_35	Epoch_36	Epoch_37	Epoch_38	Epoch_39	Epoch_40	Epoch_41	Epoch_42	Epoch_43	Epoch_44	Epoch_45	Epoch_46	Epoch_47	Epoch_48
[truncated: 1,290 more rows]
[truncated: 1 more columns]

[truncated: 7 more sheets: SR0.25_β0.25_test0_Acc, SR0.25_β1.0_test0_Error, SR0.25_β1.0_test0_Acc, SR0.25_β4.0_test0_Error, SR0.25_β4.0_test0_Acc, SR0.25_β10.0_test0_Error, SR0.25_β10.0_test0_Acc]
