# Supplementary material for: Adjoint propagation of error signal through modular recurrent neural networks for biologically plausible learning
Source: eLife. 2026 Feb 16;15:e108237. doi: 10.7554/eLife.108237 (PMC12959881; doi:10.7554/eLife.108237)
Supplement: Appendix 3—figure 3—source data 1. [file elife-108237-app3-fig3-data1.xlsx]

## Sheet: SR0.1_β1_test0_Error
	Epoch_0	Epoch_1	Epoch_2	Epoch_3	Epoch_4	Epoch_5	Epoch_6	Epoch_7	Epoch_8	Epoch_9	Epoch_10	Epoch_11	Epoch_12	Epoch_13	Epoch_14	Epoch_15	Epoch_16	Epoch_17	Epoch_18	Epoch_19	Epoch_20	Epoch_21	Epoch_22	Epoch_23	Epoch_24	Epoch_25	Epoch_26	Epoch_27	Epoch_28	Epoch_29	Epoch_30	Epoch_31	Epoch_32	Epoch_33	Epoch_34	Epoch_35	Epoch_36	Epoch_37	Epoch_38	Epoch_39	Epoch_40	Epoch_41	Epoch_42	Epoch_43	Epoch_44	Epoch_45	Epoch_46	Epoch_47	Epoch_48
Neuron_0	0.000100443	9.18429e-05	8.12743e-05	5.78976e-05	4.75819e-05	4.14523e-05	3.47888e-05	3.17066e-05	2.74985e-05	2.58695e-05	2.64064e-05	2.44132e-05	2.15031e-05	2.29318e-05	2.7339e-05	2.47623e-05	1.9109e-05	1.85546e-05	2.00584e-05	2.01926e-05	1.97548e-05	1.95501e-05	1.71049e-05	1.73876e-05	2.02621e-05	1.68429e-05	1.96324e-05	1.5124e-05	1.52111e-05	1.60365e-05	1.74558e-05	1.8409e-05	1.49189e-05	1.47748e-05	1.42102e-05	1.49133e-05	1.41198e-05	1.42209e-05	1.4621e-05	1.28633e-05	1.52257e-05	1.41585e-05	1.35532e-05	1.23251e-05	1.33251e-05	1.23363e-05	1.05935e-05	1.43282e-05	1.23811e-05
Neuron_1	0.000196234	0.000181718	0.000164188	0.000118774	0.00010028	8.63854e-05	7.9064e-05	7.04962e-05	5.9234e-05	5.61112e-05	5.45852e-05	4.78997e-05	4.87745e-05	5.14232e-05	5.18655e-05	5.04471e-05	4.5089e-05	3.83832e-05	4.12979e-05	4.4853e-05	4.09492e-05	4.12288e-05	4.11255e-05	3.71899e-05	4.31737e-05	4.21009e-05	4.17729e-05	3.16302e-05	3.70106e-05	3.80522e-05	3.58593e-05	4.2655e-05	3.68703e-05	3.15028e-05	3.42003e-05	3.39124e-05	3.3682e-05	2.99819e-05	3.28601e-05	2.63265e-05	3.6753e-05	3.29673e-05	3.31803e-05	2.79368e-05	2.91395e-05	2.70115e-05	2.5307e-05	2.80401e-05	2.72782e-05
Neuron_2	0.000242824	0.000220599	0.000180164	0.00013981	0.000117048	0.000105159	9.06702e-05	8.5623e-05	7.03582e-05	6.44517e-05	6.58048e-05	6.05906e-05	5.94879e-05	6.20182e-05	6.45684e-05	6.43183e-05	5.6623e-05	5.04551e-05	5.23389e-05	5.54662e-05	4.97287e-05	4.96344e-05	5.11215e-05	4.5704e-05	5.6914e-05	4.91639e-05	5.17948e-05	3.98776e-05	4.65953e-05	4.47772e-05	4.28291e-05	5.04123e-05	4.31888e-05	3.82201e-05	4.24325e-05	4.26778e-05	3.75934e-05	3.60269e-05	4.08755e-05	3.49512e-05	4.35721e-05	3.97617e-05	3.95912e-05	3.41018e-05	3.75075e-05	3.39335e-05	3.10831e-05	3.42438e-05	3.53707e-05
Neuron_3	0.000146086	0.000143947	0.000133304	0.000102045	8.31844e-05	6.86243e-05	5.73754e-05	5.56279e-05	5.08002e-05	4.41232e-05	5.2517e-05	4.55026e-05	4.06868e-05	4.40493e-05	5.26086e-05	4.38718e-05	4.10072e-05	3.71409e-05	3.96367e-05	3.91106e-05	3.48132e-05	3.78775e-05	3.40989e-05	3.3416e-05	3.67734e-05	3.44718e-05	3.74226e-05	3.17554e-05	3.34505e-05	3.26685e-05	3.42046e-05	3.56769e-05	3.26857e-05	3.10299e-05	2.97016e-05	3.11907e-05	3.04078e-05	2.9967e-05	3.13248e-05	2.62203e-05	3.32328e-05	2.97582e-05	2.87079e-05	2.44119e-05	2.81271e-05	2.63536e-05	2.2893e-05	2.66404e-05	2.33354e-05
Neuron_4	0.000167479	0.000138338	0.000132738	9.7224e-05	7.9899e-05	7.04324e-05	5.6481e-05	5.51091e-05	4.5134e-05	4.44827e-05	4.68068e-05	4.23101e-05	3.65779e-05	4.52701e-05	4.85687e-05	3.70064e-05	3.86813e-05	3.52022e-05	3.66667e-05	3.49265e-05	3.69112e-05	3.79264e-05	2.96971e-05	3.08909e-05	3.25503e-05	2.8924e-05	3.17868e-05	3.11474e-05	3.15205e-05	3.1048e-05	3.0468e-05	3.21089e-05	3.04286e-05	2.61655e-05	2.26931e-05	2.98039e-05	2.95409e-05	2.83174e-05	3.26035e-05	2.4243e-05	3.10251e-05	2.33034e-05	2.56088e-05	2.64064e-05	3.01175e-05	2.16619e-05	2.19799e-05	2.2771e-05	2.16526e-05
Neuron_5	0.000193212	0.00018559	0.000169491	0.0001217	0.000117773	0.000103021	9.50105e-05	8.78447e-05	7.58248e-05	7.73472e-05	7.59568e-05	7.03597e-05	6.29684e-05	6.98833e-05	7.19541e-05	6.85942e-05	6.51964e-05	6.02959e-05	6.17173e-05	6.34793e-05	6.10558e-05	6.64559e-05	5.26297e-05	5.35698e-05	6.11823e-05	5.39218e-05	6.25616e-05	4.83832e-05	5.44723e-05	5.23979e-05	5.07436e-05	5.91543e-05	5.64373e-05	4.93876e-05	4.78238e-05	4.98187e-05	4.92049e-05	4.5565e-05	4.78632e-05	4.67861e-05	5.11708e-05	4.88903e-05	5.09692e-05	4.45231e-05	4.48116e-05	4.12599e-05	3.85305e-05	4.01931e-05	3.73961e-05
Neuron_6	0.000266626	0.000241399	0.000210214	0.000149755	0.000130155	0.000123274	0.000107432	0.000100371	8.47514e-05	9.38583e-05	8.69626e-05	7.71441e-05	7.07845e-05	7.80011e-05	7.75552e-05	7.53533e-05	6.98904e-05	6.72037e-05	6.6659e-05	7.05238e-05	6.85333e-05	6.97382e-05	5.7924e-05	5.82357e-05	6.52476e-05	5.88953e-05	6.51433e-05	5.30946e-05	5.85476e-05	5.67046e-05	5.68769e-05	6.27591e-05	5.79282e-05	5.51858e-05	4.9563e-05	5.32557e-05	5.11554e-05	4.92192e-05	4.933e-05	5.29288e-05	5.78718e-05	6.09579e-05	5.76919e-05	4.68147e-05	4.41818e-05	4.5167e-05	4.36616e-05	4.29244e-05	4.15134e-05
Neuron_7	0.000206141	0.000196501	0.0001655	0.00012411	9.92653e-05	9.42741e-05	7.33626e-05	7.78769e-05	6.58786e-05	5.8278e-05	7.12371e-05	6.18667e-05	5.37871e-05	6.05806e-05	6.56819e-05	6.14739e-05	5.93057e-05	5.85265e-05	5.57543e-05	5.65309e-05	4.82354e-05	5.26574e-05	4.93665e-05	4.8499e-05	5.82174e-05	4.86189e-05	5.34121e-05	4.7615e-05	5.02744e-05	4.42042e-05	4.08984e-05	4.7439e-05	4.3307e-05	4.27454e-05	4.50567e-05	4.81463e-05	3.87475e-05	3.81578e-05	4.7378e-05	4.1638e-05	4.53225e-05	4.43034e-05	4.37706e-05	3.64481e-05	4.31059e-05	3.63509e-05	3.49344e-05	3.7148e-05	3.57985e-05
Neuron_8	0.000156722	0.000138227	0.000132351	0.00010682	8.88941e-05	8.20263e-05	7.37599e-05	6.80418e-05	5.72711e-05	5.56045e-05	5.82334e-05	5.34594e-05	4.72186e-05	4.94111e-05	5.44884e-05	5.27051e-05	4.6649e-05	4.50077e-05	4.57835e-05	4.65296e-05	4.17131e-05	4.17086e-05	3.88399e-05	3.7089e-05	4.75182e-05	3.94806e-05	4.4645e-05	3.70113e-05	3.80542e-05	3.48333e-05	3.76306e-05	3.77044e-05	3.55537e-05	3.57422e-05	3.58857e-05	3.63327e-05	3.27169e-05	3.31407e-05	3.43467e-05	2.87482e-05	3.65608e-05	3.5441e-05	3.34011e-05	2.86393e-05	3.04357e-05	3.03591e-05	2.60563e-05	3.15138e-05	2.90604e-05
Neuron_9	0.000107833	0.000119858	9.73202e-05	7.66847e-05	6.59537e-05	5.91344e-05	5.0654e-05	4.76779e-05	4.20517e-05	4.23996e-05	3.75896e-05	3.49694e-05	3.0957e-05	3.53709e-05	3.69468e-05	3.64916e-05	3.3142e-05	3.03791e-05	3.03826e-05	3.10361e-05	3.08121e-05	3.23535e-05	2.7061e-05	2.80577e-05	3.24807e-05	2.85769e-05	3.07459e-05	2.32983e-05	2.72572e-05	2.63384e-05	2.41479e-05	3.16753e-05	2.71584e-05	2.28933e-05	2.2737e-05	2.58499e-05	2.30965e-05	2.10563e-05	2.51414e-05	2.37597e-05	2.55164e-05	2.79464e-05	2.50714e-05	2.17529e-05	2.16899e-05	1.83367e-05	1.93111e-05	2.06959e-05	1.88263e-05
Neuron_10	0.000310263	0.00032499	0.000285188	0.000227572	0.000200868	0.000174752	0.000146195	0.000144127	0.000130758	0.000120141	0.000134919	0.000115033	0.000107425	0.000114012	0.000131236	0.000117777	0.000113413	0.000100523	0.000101813	0.000102712	8.893e-05	9.9102e-05	9.18831e-05	9.26288e-05	0.000100736	9.68742e-05	0.000101235	8.43538e-05	9.36644e-05	8.88996e-05	8.62922e-05	9.97414e-05	9.13323e-05	8.42222e-05	8.74096e-05	8.67404e-05	8.12703e-05	7.43476e-05	8.05365e-05	7.44737e-05	8.88048e-05	8.72888e-05	8.44364e-05	6.49225e-05	7.17951e-05	7.05485e-05	6.57276e-05	6.95942e-05	6.39964e-05
Neuron_11	0.000290171	0.000239484	0.000238423	0.000170442	0.000133954	0.000118818	0.00010354	9.71981e-05	7.82663e-05	7.67108e-05	7.64958e-05	7.16319e-05	5.81646e-05	6.8883e-05	6.96289e-05	6.15484e-05	5.98782e-05	6.01424e-05	6.20735e-05	6.02032e-05	5.87488e-05	6.15565e-05	5.10449e-05	4.84894e-05	6.15671e-05	4.67688e-05	6.10482e-05	5.14094e-05	4.86675e-05	4.98403e-05	4.67423e-05	4.88382e-05	5.09446e-05	4.08188e-05	4.15065e-05	4.92949e-05	4.60199e-05	4.12202e-05	5.23569e-05	3.88598e-05	4.97213e-05	4.01405e-05	4.33632e-05	4.46665e-05	4.73993e-05	3.45221e-05	3.41131e-05	4.02622e-05	3.77435e-05
Neuron_12	0.000285672	0.000277862	0.00022716	0.000151934	0.000118489	0.00010072	7.90688e-05	7.59438e-05	6.76993e-05	5.73328e-05	6.69e-05	5.46663e-05	5.06073e-05	5.34012e-05	6.88649e-05	5.59192e-05	4.24266e-05	4.11537e-05	4.74442e-05	5.24574e-05	4.34473e-05	4.61745e-05	4.41399e-05	4.09966e-05	4.38669e-05	3.7972e-05	4.81093e-05	3.64025e-05	3.34575e-05	3.8092e-05	3.75412e-05	4.18648e-05	4.18497e-05	3.70432e-05	3.22268e-05	3.67072e-05	3.70469e-05	3.18734e-05	3.44178e-05	3.38938e-05	3.69261e-05	2.85893e-05	3.09224e-05	2.76939e-05	3.01414e-05	2.97377e-05	2.14683e-05	3.29082e-05	2.69888e-05
Neuron_13	0.000244445	0.000198087	0.000197981	0.000137517	0.000110384	9.86651e-05	8.64858e-05	8.18292e-05	6.84433e-05	6.45394e-05	6.95204e-05	6.3352e-05	5.86454e-05	6.9939e-05	8.02937e-05	5.87495e-05	6.00921e-05	5.05042e-05	5.57598e-05	5.84125e-05	5.46699e-05	5.86314e-05	5.30492e-05	5.08501e-05	4.92848e-05	4.7631e-05	5.05658e-05	4.69535e-05	4.94898e-05	4.8894e-05	4.80683e-05	5.12245e-05	4.6688e-05	4.14049e-05	4.02236e-05	4.43558e-05	4.36934e-05	4.08463e-05	4.7241e-05	3.61601e-05	4.90756e-05	3.62611e-05	3.86578e-05	3.95759e-05	4.25467e-05	3.65865e-05	3.10474e-05	3.43948e-05	3.2905e-05
Neuron_14	0.000274946	0.000242722	0.000243226	0.000174293	0.000153177	0.000140814	0.000127877	0.000119553	9.64081e-05	9.8222e-05	0.000100689	8.71295e-05	7.95675e-05	8.61161e-05	8.49542e-05	8.70656e-05	8.09379e-05	7.80465e-05	7.63051e-05	7.88811e-05	7.20036e-05	7.28169e-05	6.51934e-05	6.5151e-05	8.58438e-05	7.38449e-05	8.02608e-05	6.16923e-05	6.88086e-05	6.50537e-05	5.83627e-05	7.48048e-05	6.49443e-05	5.7961e-05	6.22724e-05	6.4269e-05	5.83959e-05	5.04684e-05	6.27417e-05	5.23339e-05	6.52509e-05	6.73305e-05	6.53546e-05	5.21169e-05	5.49543e-05	4.76711e-05	4.84683e-05	4.95294e-05	5.07984e-05
Neuron_15	0.000320664	0.00029874	0.000290706	0.000196112	0.000165499	0.000145385	0.000130846	0.000125209	0.000106283	0.000102539	0.000113407	0.000100463	8.60045e-05	0.000103234	0.0001136	9.09635e-05	9.11167e-05	8.45112e-05	8.95239e-05	9.00066e-05	8.48753e-05	9.1921e-05	7.66393e-05	7.36319e-05	8.19541e-05	7.47108e-05	8.36272e-05	7.62472e-05	7.55679e-05	7.34272e-05	6.93037e-05	7.86072e-05	7.33022e-05	6.574e-05	6.4087e-05	7.26952e-05	7.15652e-05	6.2563e-05	7.81253e-05	5.80154e-05	7.70721e-05	6.44276e-05	6.29136e-05	6.44468e-05	6.77409e-05	5.35772e-05	5.10026e-05	5.65528e-05	5.41834e-05
Neuron_16	0.000119429	0.000122808	0.000100171	7.21206e-05	6.16718e-05	5.62145e-05	4.88399e-05	4.62902e-05	3.99482e-05	3.51024e-05	3.96883e-05	3.62925e-05	3.33059e-05	3.59327e-05	4.51507e-05	3.70926e-05	3.3311e-05	2.77528e-05	3.13178e-05	3.28975e-05	2.88366e-05	2.89079e-05	2.88824e-05	2.69568e-05	2.85063e-05	2.60738e-05	2.73663e-05	2.40658e-05	2.67624e-05	2.40737e-05	2.66006e-05	2.86084e-05	2.46667e-05	2.44287e-05	2.3418e-05	2.27727e-05	2.29514e-05	2.23595e-05	2.33527e-05	2.0716e-05	2.51966e-05	2.23328e-05	2.01615e-05	1.81375e-05	2.13785e-05	2.11847e-05	1.67186e-05	1.94183e-05	1.86057e-05
Neuron_17	0.000340284	0.000339994	0.000282214	0.000197764	0.000166454	0.000154029	0.000130653	0.000124131	0.000104691	0.000109125	0.00010127	8.82008e-05	8.26198e-05	8.64544e-05	8.78204e-05	9.22789e-05	7.69201e-05	7.66166e-05	7.57698e-05	8.32675e-05	7.6229e-05	7.81316e-05	6.57245e-05	6.61776e-05	7.35671e-05	7.10945e-05	7.55071e-05	6.04182e-05	6.39004e-05	6.67974e-05	6.37763e-05	7.20875e-05	6.4171e-05	6.01683e-05	5.74084e-05	6.02417e-05	5.74714e-05	5.72022e-05	5.39391e-05	5.91537e-05	6.23387e-05	6.87206e-05	6.22451e-05	5.07816e-05	4.96644e-05	4.92742e-05	4.8749e-05	5.03225e-05	4.54851e-05
Neuron_18	0.00023792	0.000233191	0.000198725	0.000153894	0.000120194	0.000108735	9.20001e-05	8.4181e-05	7.33011e-05	6.60976e-05	7.22209e-05	6.3094e-05	6.30663e-05	6.58839e-05	7.44507e-05	6.47029e-05	5.43499e-05	4.77083e-05	5.41013e-05	5.7632e-05	5.10489e-05	4.97352e-05	5.01556e-05	4.52119e-05	5.27765e-05	4.92694e-05	5.21003e-05	4.01206e-05	4.47858e-05	4.30414e-05	4.7565e-05	5.01825e-05	4.48277e-05	4.14026e-05	3.87521e-05	4.28841e-05	3.98375e-05	4.14288e-05	4.0953e-05	3.3255e-05	4.51803e-05	3.7708e-05	3.70958e-05	3.21546e-05	3.64907e-05	3.59e-05	2.942e-05	3.71342e-05	3.40138e-05
Neuron_19	0.000205631	0.000161414	0.0001507	0.000113276	0.000108074	8.85665e-05	8.42378e-05	7.56463e-05	6.56645e-05	6.6179e-05	6.49462e-05	5.82527e-05	5.49735e-05	5.90005e-05	5.89173e-05	5.94847e-05	5.31683e-05	4.80565e-05	5.04539e-05	5.61519e-05	5.09657e-05	5.51039e-05	4.64766e-05	4.56434e-05	5.13711e-05	4.59512e-05	5.44215e-05	3.84518e-05	4.34326e-05	4.51927e-05	4.52289e-05	4.88364e-05	4.89349e-05	4.36386e-05	4.17854e-05	4.23949e-05	4.12629e-05	3.96454e-05	3.82431e-05	3.96167e-05	4.21878e-05	4.01636e-05	4.326e-05	3.69177e-05	3.6147e-05	3.72132e-05	3.12521e-05	3.57534e-05	3.14639e-05
Neuron_20	0.000297038	0.000279114	0.000244248	0.000184374	0.000147713	0.000137334	0.000117496	0.000109651	0.000101771	9.28603e-05	9.94428e-05	9.10052e-05	7.79863e-05	9.20119e-05	9.91907e-05	8.85006e-05	8.25216e-05	7.51143e-05	7.97216e-05	8.06097e-05	7.34367e-05	7.6459e-05	7.17835e-05	6.91562e-05	8.03629e-05	6.54626e-05	7.39662e-05	6.0611e-05	6.67533e-05	6.07685e-05	6.73356e-05	6.69869e-05	6.13976e-05	6.09433e-05	5.81551e-05	5.95683e-05	5.40604e-05	5.51972e-05	5.98384e-05	5.21633e-05	6.46644e-05	6.17911e-05	5.82093e-05	5.0918e-05	5.42314e-05	5.15309e-05	4.47002e-05	5.49946e-05	4.85423e-05
Neuron_21	0.000259114	0.000216975	0.000199134	0.000158456	0.000142062	0.000134015	0.000113505	0.000105024	8.45458e-05	9.2777e-05	8.67138e-05	8.17685e-05	7.35568e-05	8.14117e-05	7.89446e-05	8.57185e-05	8.04677e-05	7.31308e-05	7.1828e-05	7.45933e-05	6.89318e-05	6.96199e-05	6.00765e-05	6.31315e-05	7.83023e-05	6.61418e-05	6.87396e-05	5.48211e-05	6.59458e-05	5.71215e-05	5.55867e-05	6.79934e-05	5.57694e-05	5.62701e-05	5.58631e-05	5.94517e-05	5.2232e-05	5.31995e-05	5.65151e-05	5.38756e-05	5.68732e-05	6.39614e-05	5.89868e-05	4.98304e-05	5.31323e-05	4.63109e-05	4.92097e-05	4.62993e-05	4.56726e-05
Neuron_22	0.000267363	0.000236052	0.000197984	0.00014067	0.000122917	0.00010688	9.76602e-05	8.91532e-05	7.42821e-05	8.12046e-05	7.44571e-05	6.90138e-05	6.55396e-05	7.00433e-05	6.71099e-05	6.6904e-05	6.031e-05	5.43085e-05	5.8965e-05	6.72044e-05	6.20457e-05	6.12664e-05	5.35062e-05	5.15739e-05	5.50239e-05	5.02108e-05	5.9735e-05	4.19848e-05	4.88126e-05	5.08847e-05	5.39978e-05	5.07651e-05	5.13648e-05	4.58096e-05	3.88884e-05	5.16175e-05	4.41901e-05	4.72721e-05	4.69754e-05	4.30428e-05	4.91315e-05	4.64113e-05	4.65362e-05	4.31737e-05	4.13144e-05	3.91566e-05	3.55296e-05	4.11533e-05	3.57076e-05
Neuron_23	0.000237035	0.00021142	0.000176413	0.000123077	0.000106176	9.13422e-05	7.38835e-05	8.00449e-05	6.19913e-05	6.12641e-05	6.68626e-05	6.12837e-05	5.55662e-05	6.1869e-05	6.13243e-05	5.88056e-05	5.72339e-05	5.54438e-05	5.37406e-05	5.63648e-05	5.32571e-05	5.5163e-05	4.64347e-05	4.82777e-05	5.25761e-05	4.88752e-05	5.04422e-05	4.49519e-05	4.92605e-05	4.64701e-05	4.01104e-05	4.78129e-05	4.32174e-05	3.82054e-05	4.077e-05	4.93122e-05	3.78462e-05	3.77954e-05	4.92967e-05	4.11079e-05	4.38878e-05	4.1074e-05	4.28926e-05	3.96681e-05	4.29627e-05	3.2398e-05	3.43349e-05	3.52049e-05	3.40078e-05
Neuron_24	0.000154508	0.000170179	0.00013169	9.27709e-05	8.11879e-05	7.32724e-05	6.15336e-05	6.04616e-05	5.06939e-05	5.01303e-05	4.77051e-05	4.29687e-05	3.86463e-05	4.22578e-05	4.61265e-05	4.75247e-05	3.94729e-05	3.8059e-05	3.76025e-05	3.91447e-05	3.83891e-05	4.1526e-05	3.29558e-05	3.29464e-05	3.90671e-05	3.38805e-05	3.91987e-05	2.94561e-05	3.28553e-05	3.20691e-05	2.88758e-05	3.89476e-05	3.45828e-05	2.91675e-05	2.71355e-05	3.26815e-05	3.07165e-05	2.70622e-05	3.00452e-05	3.05701e-05	3.06889e-05	3.28572e-05	3.05409e-05	2.72994e-05	2.72649e-05	2.35231e-05	2.34213e-05	2.71978e-05	2.32343e-05
Neuron_25	0.000256241	0.000268539	0.000226375	0.000166573	0.000123965	0.000111199	8.86266e-05	8.19998e-05	7.2713e-05	6.64677e-05	6.87627e-05	5.96142e-05	5.46763e-05	5.9697e-05	7.10985e-05	6.37741e-05	5.00598e-05	4.37833e-05	4.96038e-05	5.28119e-05	5.07994e-05	4.61542e-05	4.43261e-05	4.37936e-05	4.73666e-05	4.42491e-05	4.61845e-05	3.80273e-05	3.91866e-05	3.88601e-05	4.4384e-05	4.6059e-05	3.67422e-05	3.73366e-05	3.3633e-05	3.60959e-05	3.35537e-05	3.46497e-05	3.76562e-05	2.99053e-05	4.13346e-05	3.70687e-05	3.17028e-05	2.97071e-05	3.02549e-05	2.95122e-05	2.58327e-05	3.15912e-05	2.87537e-05
Neuron_26	0.000228309	0.000180158	0.000156286	0.000115825	9.55745e-05	8.36891e-05	6.88881e-05	6.99245e-05	5.49417e-05	5.25498e-05	5.58758e-05	4.70958e-05	4.72656e-05	4.5351e-05	5.23948e-05	4.96494e-05	4.42874e-05	3.89594e-05	4.01326e-05	4.56393e-05	3.72675e-05	3.92749e-05	4.12393e-05	3.93094e-05	3.94303e-05	3.78723e-05	4.34868e-05	3.39873e-05	3.67643e-05	3.87265e-05	3.56543e-05	4.10019e-05	3.81042e-05	3.37883e-05	3.74915e-05	3.53936e-05	3.06492e-05	2.69511e-05	3.0769e-05	3.08894e-05	3.47039e-05	3.21237e-05	3.32913e-05	2.54978e-05	2.67675e-05	2.90998e-05	2.43108e-05	2.60796e-05	2.77334e-05
Neuron_27	0.000356584	0.000345272	0.000317386	0.000267462	0.000222732	0.000204556	0.000178145	0.0001608	0.000141325	0.000142006	0.000137006	0.000128249	0.000116779	0.000125678	0.000128398	0.000126941	0.000119925	0.000105152	0.000110722	0.000109186	0.000103786	0.000100852	9.45589e-05	9.65563e-05	0.000119369	0.000102769	0.000109514	8.07476e-05	9.61252e-05	9.02286e-05	9.5957e-05	0.000101165	8.5956e-05	8.26665e-05	8.3398e-05	9.3174e-05	7.73774e-05	8.18181e-05	8.55681e-05	7.18294e-05	9.24246e-05	9.64503e-05	8.92683e-05	7.35162e-05	7.52642e-05	7.03056e-05	7.01772e-05	7.97725e-05	7.25357e-05
Neuron_28	0.000420973	0.000372586	0.000348429	0.000259751	0.000232466	0.000215084	0.000187723	0.000174961	0.000151322	0.000163287	0.000152772	0.000140912	0.000122665	0.000139583	0.00013943	0.000134359	0.000128343	0.000127652	0.000123997	0.000126079	0.000122114	0.000126335	0.000101081	0.000104608	0.000120985	0.000108705	0.000116465	9.83281e-05	0.000109505	0.000102079	9.53732e-05	0.000114954	0.000104244	9.51761e-05	9.15601e-05	9.56581e-05	9.47386e-05	8.7344e-05	9.52624e-05	9.59987e-05	0.000102256	0.000112527	0.000103548	8.58487e-05	8.76285e-05	7.69948e-05	8.03787e-05	7.70108e-05	7.20482e-05
Neuron_29	9.41474e-05	0.000111478	8.28943e-05	6.24911e-05	5.03892e-05	4.21975e-05	3.30537e-05	3.47449e-05	3.03936e-05	2.51342e-05	2.64653e-05	2.40169e-05	2.2878e-05	2.32567e-05	2.72186e-05	2.66336e-05	2.21561e-05	1.92907e-05	2.07676e-05	2.30845e-05	2.00752e-05	2.10404e-05	1.91167e-05	1.91888e-05	1.8932e-05	1.98476e-05	2.10056e-05	1.60287e-05	1.82041e-05	1.83654e-05	1.69813e-05	1.98709e-05	1.86886e-05	1.56276e-05	1.68949e-05	1.79209e-05	1.54147e-05	1.40607e-05	1.75566e-05	1.55542e-05	1.72106e-05	1.73869e-05	1.58118e-05	1.34736e-05	1.4073e-05	1.27972e-05	1.19668e-05	1.43077e-05	1.31953e-05
Neuron_30	0.0003506	0.000331193	0.00030453	0.000244513	0.000225154	0.000213709	0.000169874	0.000172736	0.000147178	0.000149321	0.000159458	0.000137385	0.000120223	0.000128359	0.000125905	0.000142151	0.000135211	0.000137078	0.00012417	0.000125686	0.000110185	0.000117495	9.94135e-05	0.000108845	0.000138974	0.000116155	0.000130565	9.96378e-05	0.000117229	0.000101256	8.68154e-05	0.00011877	0.000103387	9.90424e-05	0.000104882	0.00011018	9.10156e-05	8.48834e-05	0.000101633	9.98407e-05	9.98276e-05	0.000118574	0.000110444	8.2669e-05	9.35801e-05	7.99888e-05	8.72851e-05	7.99924e-05	7.87e-05
Neuron_31	0.000180466	0.000151904	0.000138872	9.97145e-05	8.45775e-05	6.95517e-05	6.19709e-05	5.79959e-05	5.19288e-05	4.90895e-05	4.95527e-05	4.35097e-05	3.99368e-05	4.26786e-05	4.2344e-05	4.33798e-05	3.66475e-05	3.59113e-05	3.70898e-05	4.03869e-05	3.69742e-05	3.99772e-05	3.32998e-05	3.39592e-05	3.72815e-05	3.32421e-05	4.0125e-05	2.73807e-05	3.00748e-05	3.28782e-05	3.27744e-05	3.43789e-05	3.39044e-05	3.01922e-05	2.91227e-05	2.92895e-05	2.81135e-05	2.72737e-05	2.76676e-05	2.80577e-05	3.02738e-05	2.97355e-05	3.08318e-05	2.56241e-05	2.49568e-05	2.5144e-05	2.25726e-05	2.59988e-05	2.22952e-05
Neuron_32	0.00029522	0.000265801	0.000232953	0.00017113	0.000137347	0.000130388	0.000111639	0.00010309	8.47319e-05	8.91259e-05	8.36727e-05	7.31206e-05	7.35248e-05	7.51836e-05	7.41239e-05	7.07938e-05	6.54757e-05	6.09881e-05	6.01961e-05	6.97578e-05	6.26692e-05	6.21405e-05	5.72228e-05	5.62034e-05	5.82654e-05	5.83357e-05	6.437e-05	4.68861e-05	5.53072e-05	5.58643e-05	5.56147e-05	6.01184e-05	5.49168e-05	5.08591e-05	4.64464e-05	5.08165e-05	4.54189e-05	4.34152e-05	4.56892e-05	4.68923e-05	5.49378e-05	5.56203e-05	5.38569e-05	4.2371e-05	3.86654e-05	4.26827e-05	3.9689e-05	3.85548e-05	3.9178e-05
Neuron_33	0.000187849	0.000176588	0.0001571	0.000117348	9.20331e-05	8.35339e-05	6.95356e-05	7.18093e-05	5.94975e-05	5.13729e-05	6.45228e-05	5.2677e-05	4.57716e-05	4.65368e-05	5.02401e-05	5.30879e-05	4.5918e-05	4.83906e-05	4.61063e-05	4.92728e-05	3.88877e-05	4.15888e-05	4.06383e-05	3.79514e-05	5.01919e-05	4.08544e-05	5.00741e-05	3.95889e-05	3.88548e-05	3.62857e-05	3.45685e-05	3.85705e-05	3.91335e-05	3.55177e-05	3.8236e-05	3.80806e-05	3.25909e-05	2.89956e-05	3.61635e-05	3.35325e-05	3.72467e-05	3.63903e-05	3.56253e-05	2.86848e-05	3.09749e-05	3.01136e-05	2.60651e-05	3.14384e-05	3.1935e-05
Neuron_34	0.000132632	0.000118698	0.000115075	9.36773e-05	8.33512e-05	8.04021e-05	7.05023e-05	6.3576e-05	5.39049e-05	5.95173e-05	5.71551e-05	5.16839e-05	4.72411e-05	5.36588e-05	5.58837e-05	5.1648e-05	5.07618e-05	4.24438e-05	4.51911e-05	4.52716e-05	4.38276e-05	4.13069e-05	3.80456e-05	3.90786e-05	4.69994e-05	4.01687e-05	4.01005e-05	3.45219e-05	4.032e-05	3.46257e-05	3.94885e-05	4.22498e-05	3.41745e-05	3.62859e-05	3.28976e-05	3.54134e-05	3.29125e-05	3.47826e-05	3.38323e-05	3.04893e-05	3.71996e-05	3.96571e-05	3.53835e-05	2.95802e-05	3.00679e-05	2.9943e-05	2.96932e-05	3.0071e-05	2.97274e-05
Neuron_35	0.000264894	0.000272394	0.000234097	0.000163416	0.000136639	0.000109672	0.00010691	9.63425e-05	8.51496e-05	7.69666e-05	7.94751e-05	7.34361e-05	6.84459e-05	7.57012e-05	8.09908e-05	7.15477e-05	6.38749e-05	5.63712e-05	6.30144e-05	6.60014e-05	6.16533e-05	6.8885e-05	5.74485e-05	5.47612e-05	6.38472e-05	5.27978e-05	6.39993e-05	4.83419e-05	4.96507e-05	5.30072e-05	5.69572e-05	5.49817e-05	5.74788e-05	4.51763e-05	4.56741e-05	4.87496e-05	5.01493e-05	4.5492e-05	5.02857e-05	4.09709e-05	5.2793e-05	4.03906e-05	4.61817e-05	4.68007e-05	4.51652e-05	3.93683e-05	3.31043e-05	4.4186e-05	3.81244e-05
Neuron_36	0.000254915	0.000243982	0.000204752	0.000147103	0.000128965	0.000107088	9.96889e-05	9.40158e-05	7.82114e-05	7.8174e-05	7.34181e-05	6.49795e-05	6.14237e-05	6.23319e-05	6.22956e-05	6.83972e-05	5.69794e-05	5.42786e-05	5.53069e-05	6.18477e-05	5.40145e-05	5.93572e-05	5.02922e-05	4.88797e-05	5.61873e-05	5.07573e-05	5.87883e-05	4.26151e-05	4.64824e-05	4.95199e-05	4.63618e-05	5.10731e-05	5.05778e-05	4.38049e-05	4.29031e-05	4.67196e-05	4.38308e-05	4.21066e-05	4.05206e-05	4.19195e-05	4.53195e-05	4.55198e-05	4.57529e-05	3.87603e-05	3.80586e-05	3.67066e-05	3.46091e-05	4.04367e-05	3.35409e-05
Neuron_37	0.000227371	0.000205778	0.00017906	0.00014219	0.000118008	0.000112094	9.61441e-05	8.92897e-05	7.99411e-05	7.25953e-05	7.99426e-05	7.27594e-05	6.76566e-05	7.55969e-05	8.88654e-05	7.39037e-05	6.82473e-05	5.72531e-05	6.38165e-05	6.73039e-05	5.80988e-05	5.93499e-05	5.90047e-05	5.49766e-05	5.97259e-05	5.34479e-05	5.5474e-05	5.0732e-05	5.55955e-05	4.80433e-05	5.52487e-05	5.59873e-05	4.92209e-05	5.23049e-05	4.91119e-05	4.61586e-05	4.49975e-05	4.6574e-05	4.60278e-05	4.18517e-05	5.3041e-05	4.81679e-05	4.36934e-05	3.7501e-05	4.20233e-05	4.49258e-05	3.56356e-05	4.0039e-05	3.85856e-05
Neuron_38	0.000115991	0.000119594	9.6401e-05	7.27572e-05	5.9738e-05	5.20107e-05	4.3811e-05	4.16658e-05	3.58107e-05	3.37614e-05	3.22549e-05	2.90904e-05	2.72886e-05	2.73847e-05	2.88739e-05	3.10722e-05	2.51992e-05	2.41854e-05	2.44361e-05	2.72609e-05	2.46322e-05	2.42642e-05	2.10825e-05	2.02238e-05	2.46562e-05	2.25388e-05	2.51601e-05	1.91594e-05	2.04071e-05	2.02983e-05	1.9455e-05	2.19741e-05	2.02957e-05	1.84442e-05	1.84622e-05	2.03002e-05	1.87467e-05	1.79648e-05	1.93145e-05	1.73036e-05	1.99904e-05	2.0664e-05	1.8372e-05	1.596e-05	1.62912e-05	1.5158e-05	1.46523e-05	1.70961e-05	1.47681e-05
Neuron_39	0.000306628	0.000257852	0.000244928	0.000196918	0.000168355	0.000146198	0.000111895	0.000108265	9.25874e-05	8.25365e-05	9.67754e-05	8.03163e-05	7.86253e-05	8.18313e-05	0.00010236	7.79225e-05	7.47072e-05	6.06174e-05	6.83183e-05	7.44467e-05	6.11337e-05	6.45653e-05	6.90418e-05	6.49774e-05	6.44863e-05	6.34463e-05	7.13589e-05	5.4428e-05	6.04848e-05	5.88989e-05	5.96981e-05	6.75858e-05	6.71465e-05	6.07917e-05	5.88693e-05	5.51138e-05	5.58422e-05	4.75328e-05	5.16587e-05	5.16061e-05	5.89061e-05	5.07056e-05	5.31662e-05	3.95811e-05	4.37836e-05	5.18155e-05	3.75045e-05	4.63535e-05	4.59258e-05
Neuron_40	0.000250098	0.000223895	0.000216374	0.000154389	0.00012143	0.000112474	0.000100224	9.275e-05	7.54833e-05	7.50129e-05	8.02438e-05	6.73425e-05	6.21093e-05	6.25347e-05	6.52931e-05	7.09555e-05	5.62622e-05	5.97732e-05	5.75758e-05	6.4756e-05	5.67303e-05	5.48607e-05	4.90856e-05	4.70508e-05	6.10703e-05	5.21327e-05	6.37095e-05	4.73413e-05	4.71083e-05	4.64072e-05	4.566e-05	4.97597e-05	4.90046e-05	4.49987e-05	4.41234e-05	4.7638e-05	4.2926e-05	4.16483e-05	4.28366e-05	4.17669e-05	4.7408e-05	4.6998e-05	4.58033e-05	3.87623e-05	3.88499e-05	3.80166e-05	3.34408e-05	4.12081e-05	3.63682e-05
Neuron_41	0.000185348	0.000196243	0.000166549	0.000135704	0.000112739	9.76692e-05	8.22151e-05	7.97186e-05	7.26859e-05	6.06614e-05	7.2234e-05	6.27999e-05	5.92353e-05	6.24229e-05	7.65855e-05	6.42305e-05	5.80524e-05	4.98184e-05	5.5284e-05	5.68762e-05	4.74473e-05	5.04095e-05	5.05752e-05	4.70802e-05	5.17743e-05	5.06587e-05	5.12615e-05	4.35037e-05	4.7304e-05	4.49834e-05	4.80938e-05	5.14991e-05	4.72259e-05	4.51604e-05	4.36577e-05	4.25947e-05	4.24923e-05	4.03078e-05	4.16267e-05	3.58502e-05	4.74534e-05	4.18801e-05	3.97018e-05	3.17906e-05	3.66568e-05	3.89435e-05	3.07204e-05	3.61714e-05	3.35631e-05
Neuron_42	0.000170277	0.000173978	0.000152192	0.000130445	0.000109188	0.000106291	9.01162e-05	8.66787e-05	7.44454e-05	7.37241e-05	7.30971e-05	6.70843e-05	5.86724e-05	6.0873e-05	6.14507e-05	6.85487e-05	6.34971e-05	6.0984e-05	5.91862e-05	5.68582e-05	5.14963e-05	5.15471e-05	4.82646e-05	5.00753e-05	6.58593e-05	5.71128e-05	6.02588e-05	4.64883e-05	5.39682e-05	4.81237e-05	4.40189e-05	5.56449e-05	4.66331e-05	4.38705e-05	5.00338e-05	4.94713e-05	4.28413e-05	3.94175e-05	4.50747e-05	4.21078e-05	4.8911e-05	5.6741e-05	5.01073e-05	3.7529e-05	4.00047e-05	3.70205e-05	3.94127e-05	4.08599e-05	3.93954e-05
Neuron_43	0.000106519	0.000128039	0.000103786	7.64104e-05	5.74558e-05	5.54606e-05	4.412e-05	4.5141e-05	3.77304e-05	3.31658e-05	3.8639e-05	3.25496e-05	2.77037e-05	2.99188e-05	3.75078e-05	3.4104e-05	2.92326e-05	2.67369e-05	2.75432e-05	2.80316e-05	2.47102e-05	2.46183e-05	2.43714e-05	2.33434e-05	2.96298e-05	2.40142e-05	2.85053e-05	2.16478e-05	2.36988e-05	2.19421e-05	2.29071e-05	2.52936e-05	2.15032e-05	2.03397e-05	2.03596e-05	2.2878e-05	1.92931e-05	1.73678e-05	2.26431e-05	1.79327e-05	2.28402e-05	2.32691e-05	2.04756e-05	1.7283e-05	1.8227e-05	1.63927e-05	1.48362e-05	2.05048e-05	1.8879e-05
Neuron_44	0.000214358	0.000196445	0.000177634	0.000130228	0.000101967	8.26054e-05	7.35059e-05	6.45669e-05	5.82221e-05	5.07671e-05	5.24926e-05	4.77035e-05	4.07068e-05	4.66637e-05	4.79536e-05	4.45868e-05	3.68399e-05	3.64026e-05	4.12834e-05	4.2645e-05	3.96653e-05	4.18698e-05	3.52501e-05	3.34047e-05	4.24645e-05	3.33638e-05	4.34664e-05	2.88827e-05	2.82875e-05	3.34039e-05	3.50407e-05	3.35873e-05	3.52606e-05	2.79149e-05	2.69549e-05	3.06881e-05	3.01026e-05	2.8173e-05	3.01459e-05	2.50964e-05	3.16422e-05	2.56761e-05	2.83723e-05	2.79393e-05	2.76032e-05	2.39685e-05	1.89076e-05	3.06054e-05	2.39786e-05
Neuron_45	0.000195724	0.000180369	0.000157177	0.000126053	0.000108235	0.000103894	8.91359e-05	8.482e-05	7.32606e-05	7.1311e-05	7.58284e-05	6.93005e-05	5.79093e-05	6.44154e-05	6.93119e-05	6.9342e-05	6.44539e-05	6.04353e-05	6.1058e-05	6.00392e-05	5.37359e-05	5.60276e-05	5.28976e-05	5.16465e-05	6.54903e-05	5.10411e-05	5.8541e-05	4.74895e-05	5.24222e-05	4.57127e-05	4.83992e-05	5.09992e-05	4.54902e-05	4.76364e-05	4.76215e-05	4.7868e-05	4.06301e-05	4.05956e-05	4.52347e-05	4.13451e-05	4.82464e-05	5.04525e-05	4.65411e-05	3.89703e-05	4.07611e-05	3.95038e-05	3.658e-05	4.12943e-05	3.85847e-05
Neuron_46	0.000247397	0.000221628	0.000192833	0.000155588	0.000150872	0.000133235	0.000114546	0.000111261	9.64602e-05	9.87926e-05	9.80877e-05	8.53128e-05	8.29322e-05	8.7295e-05	8.46474e-05	8.73354e-05	8.09503e-05	7.67591e-05	7.39366e-05	8.26644e-05	7.35454e-05	7.92419e-05	6.96169e-05	6.85228e-05	7.65214e-05	7.39572e-05	7.85712e-05	5.733e-05	6.95951e-05	6.86766e-05	6.1684e-05	7.44026e-05	7.15207e-05	6.65171e-05	6.46499e-05	6.57099e-05	5.85059e-05	5.58187e-05	5.72164e-05	6.23748e-05	6.47029e-05	7.07885e-05	6.98339e-05	5.14399e-05	5.18605e-05	5.50438e-05	5.19855e-05	5.07169e-05	4.89865e-05
Neuron_47	0.0002249	0.000184057	0.000177152	0.00012953	0.000104561	9.13493e-05	8.07802e-05	7.13387e-05	5.85923e-05	5.53404e-05	5.48008e-05	5.10021e-05	4.96084e-05	5.60067e-05	5.70321e-05	4.71541e-05	4.47907e-05	3.83065e-05	4.27298e-05	4.31031e-05	4.42388e-05	4.49385e-05	3.89012e-05	3.61637e-05	4.18049e-05	3.81702e-05	4.12033e-05	3.23389e-05	3.67385e-05	3.73035e-05	3.76593e-05	3.87196e-05	3.66956e-05	2.93895e-05	2.8291e-05	3.41889e-05	3.31842e-05	3.16565e-05	3.64944e-05	2.47526e-05	3.7348e-05	2.68278e-05	3.03211e-05	3.08388e-05	3.20922e-05	2.56446e-05	2.43565e-05	2.73884e-05	2.66902e-05
Neuron_48	0.000208589	0.00016832	0.000157324	0.000104711	8.81003e-05	6.86569e-05	6.36598e-05	5.71025e-05	4.39395e-05	4.88495e-05	4.12734e-05	3.64052e-05	3.47167e-05	3.76087e-05	3.51447e-05	3.75107e-05	3.00653e-05	2.81196e-05	3.01936e-05	3.5419e-05	3.36834e-05	3.54301e-05	2.88562e-05	2.62078e-05	3.06299e-05	2.4765e-05	3.26331e-05	2.28242e-05	2.27807e-05	2.75591e-05	2.64329e-05	2.6451e-05	2.80557e-05	2.19324e-05	2.04786e-05	2.52517e-05	2.50826e-05	2.47967e-05	2.38038e-05	2.12202e-05	2.33867e-05	1.90149e-05	2.09774e-05	2.36729e-05	2.2986e-05	1.86894e-05	1.67596e-05	2.22053e-05	1.81493e-05
Neuron_49	0.000262048	0.00021027	0.000181676	0.000146196	0.000124765	0.000121349	9.75457e-05	0.000101126	8.7001e-05	8.02051e-05	9.23334e-05	8.54285e-05	7.3639e-05	8.43295e-05	9.74365e-05	8.09395e-05	8.26969e-05	7.44213e-05	7.58897e-05	7.73462e-05	6.56413e-05	7.10266e-05	6.79494e-05	6.6202e-05	7.16567e-05	6.33283e-05	6.7798e-05	6.37008e-05	6.87917e-05	5.9105e-05	5.68094e-05	6.47911e-05	5.87852e-05	5.83927e-05	6.03473e-05	6.18707e-05	5.2621e-05	5.21567e-05	6.04895e-05	5.4655e-05	6.10196e-05	5.76832e-05	5.63742e-05	4.78709e-05	5.57523e-05	5.08849e-05	4.45496e-05	4.77033e-05	4.52932e-05
Neuron_50	0.000186999	0.000163497	0.000147989	0.000123411	9.91625e-05	9.16125e-05	7.34049e-05	7.05205e-05	6.01613e-05	5.5936e-05	5.88003e-05	5.01223e-05	4.71548e-05	4.8518e-05	5.3588e-05	4.98584e-05	4.14653e-05	4.11247e-05	4.17186e-05	4.60193e-05	4.1182e-05	4.03991e-05	3.62201e-05	3.66419e-05	3.88901e-05	3.9529e-05	4.33042e-05	3.32927e-05	3.48182e-05	3.47828e-05	3.39506e-05	3.82908e-05	3.64099e-05	3.4961e-05	3.05664e-05	3.19873e-05	3.08739e-05	2.7419e-05	3.09307e-05	3.25434e-05	3.45728e-05	3.519e-05	3.43083e-05	2.65099e-05	2.49212e-05	2.80224e-05	2.38554e-05	2.65991e-05	2.46434e-05
Neuron_51	0.000335634	0.000283135	0.000253799	0.000183364	0.000156603	0.000147494	0.000116263	0.000122423	9.7924e-05	9.75645e-05	0.000106687	9.45804e-05	7.92401e-05	9.27629e-05	9.69967e-05	9.54794e-05	9.22103e-05	9.25746e-05	8.33948e-05	8.61551e-05	7.79061e-05	8.48229e-05	7.09738e-05	7.43362e-05	8.8595e-05	7.36716e-05	7.89319e-05	7.41645e-05	7.68789e-05	6.55817e-05	5.97521e-05	7.15125e-05	6.23106e-05	6.31085e-05	6.46653e-05	7.53482e-05	5.83978e-05	6.01866e-05	7.30601e-05	6.464e-05	6.5135e-05	6.65143e-05	6.55945e-05	6.03299e-05	6.72913e-05	5.15677e-05	5.44293e-05	5.62849e-05	5.13389e-05
Neuron_52	0.000173869	0.000184925	0.000146925	0.000101597	8.03157e-05	7.30987e-05	5.23781e-05	5.71032e-05	4.62737e-05	4.23632e-05	4.69128e-05	4.07884e-05	3.58408e-05	4.09505e-05	4.27513e-05	4.22588e-05	3.74563e-05	3.71928e-05	3.59134e-05	3.6011e-05	3.63649e-05	3.78552e-05	2.93946e-05	3.23071e-05	3.77013e-05	3.3239e-05	3.37954e-05	2.88715e-05	3.15842e-05	3.05258e-05	2.72256e-05	3.49018e-05	2.86658e-05	2.54118e-05	2.53086e-05	3.24059e-05	2.54811e-05	2.5332e-05	3.42907e-05	2.73195e-05	2.9525e-05	2.73009e-05	2.64209e-05	2.67278e-05	2.97976e-05	1.96881e-05	2.2935e-05	2.2988e-05	2.28002e-05
Neuron_53	0.000230654	0.000213333	0.000176628	0.000125389	9.84276e-05	8.78247e-05	7.32673e-05	7.32592e-05	6.25948e-05	5.88414e-05	6.09177e-05	5.5381e-05	4.45068e-05	5.22877e-05	5.48968e-05	5.47072e-05	4.7434e-05	4.92294e-05	4.84752e-05	4.8259e-05	4.36585e-05	4.84129e-05	4.16742e-05	4.0459e-05	5.19034e-05	4.09715e-05	4.90562e-05	3.91553e-05	3.81744e-05	3.84334e-05	3.52141e-05	4.05464e-05	3.74595e-05	3.26346e-05	3.31461e-05	4.08421e-05	3.46462e-05	3.26733e-05	3.95939e-05	3.42668e-05	3.74804e-05	3.5441e-05	3.69921e-05	3.39433e-05	3.65213e-05	2.70152e-05	2.7485e-05	3.52744e-05	2.81306e-05
Neuron_54	0.000219326	0.000232791	0.000199337	0.000141689	0.00011641	9.66556e-05	8.41957e-05	8.19928e-05	7.17807e-05	6.24754e-05	6.86699e-05	6.05383e-05	5.41535e-05	5.85962e-05	7.1415e-05	6.33299e-05	5.49005e-05	4.70952e-05	5.31245e-05	5.51046e-05	4.8618e-05	5.19525e-05	4.94056e-05	4.56321e-05	5.01236e-05	4.69422e-05	5.09154e-05	4.20449e-05	4.39564e-05	4.45083e-05	4.40989e-05	4.98498e-05	4.54994e-05	3.90378e-05	3.98692e-05	4.20549e-05	4.17869e-05	3.69316e-05	4.27386e-05	3.47573e-05	4.44314e-05	3.92499e-05	3.58796e-05	3.42675e-05	3.75907e-05	3.32755e-05	2.75839e-05	3.65976e-05	3.23803e-05
Neuron_55	0.000221507	0.000202761	0.000169062	0.000124597	0.000100141	8.13651e-05	7.11884e-05	6.62661e-05	5.5761e-05	4.9649e-05	5.28111e-05	4.61837e-05	4.83666e-05	4.97301e-05	5.28731e-05	4.57285e-05	3.88736e-05	3.37944e-05	3.93687e-05	4.38899e-05	3.71697e-05	3.93863e-05	4.05102e-05	3.5288e-05	3.89307e-05	3.68751e-05	3.93762e-05	2.73444e-05	3.19846e-05	3.47329e-05	3.46341e-05	3.67388e-05	3.4976e-05	3.08647e-05	3.04612e-05	3.11839e-05	2.98164e-05	2.73692e-05	3.04299e-05	2.6852e-05	3.31739e-05	2.63427e-05	2.99166e-05	2.51411e-05	2.56281e-05	2.64755e-05	2.16619e-05	2.49382e-05	2.45703e-05
Neuron_56	0.00023727	0.000231536	0.000204735	0.000148491	0.000126167	0.000106703	9.27995e-05	8.53111e-05	7.85698e-05	7.00188e-05	7.61515e-05	6.7485e-05	6.01179e-05	6.72697e-05	7.58438e-05	6.59187e-05	6.09418e-05	5.43996e-05	5.97651e-05	6.11486e-05	5.5191e-05	6.04075e-05	5.37672e-05	5.14651e-05	5.5983e-05	5.27452e-05	5.7715e-05	4.74611e-05	4.87556e-05	5.06026e-05	4.93486e-05	5.43511e-05	5.1738e-05	4.65232e-05	4.72932e-05	4.77101e-05	4.72894e-05	4.13372e-05	4.80322e-05	4.01908e-05	5.06043e-05	4.46091e-05	4.35411e-05	4.03598e-05	4.10041e-05	3.88061e-05	3.3303e-05	4.01431e-05	3.72769e-05
Neuron_57	0.000236548	0.000185774	0.000182397	0.000140592	0.000129873	0.000121506	0.000109853	9.74751e-05	8.19096e-05	9.28382e-05	8.53539e-05	7.98529e-05	7.03589e-05	8.01779e-05	8.02251e-05	7.94278e-05	7.60861e-05	6.88404e-05	6.99582e-05	7.09922e-05	6.91652e-05	6.89403e-05	5.72702e-05	6.12951e-05	7.23738e-05	6.12018e-05	6.59265e-05	5.35218e-05	6.20144e-05	5.66244e-05	5.74129e-05	6.55009e-05	5.51966e-05	5.36302e-05	5.2309e-05	5.43149e-05	5.23952e-05	5.17093e-05	5.33571e-05	5.04852e-05	5.56207e-05	6.16078e-05	5.61271e-05	4.89634e-05	4.91822e-05	4.42292e-05	4.54129e-05	4.66679e-05	4.3871e-05
Neuron_58	0.000308105	0.00025888	0.000242836	0.000167513	0.000142822	0.000132262	0.000113125	0.000107152	8.59004e-05	9.22561e-05	9.16205e-05	8.54241e-05	7.21778e-05	8.77894e-05	9.40421e-05	7.85247e-05	7.83671e-05	7.32967e-05	7.46887e-05	7.54094e-05	7.34086e-05	7.82449e-05	6.25795e-05	6.24503e-05	7.2213e-05	5.99788e-05	6.3399e-05	6.30557e-05	6.38289e-05	5.6548e-05	5.77219e-05	6.29009e-05	5.43527e-05	5.39533e-05	4.83031e-05	5.85438e-05	5.45649e-05	5.37815e-05	6.26894e-05	5.08512e-05	6.02094e-05	5.29776e-05	5.32499e-05	5.54792e-05	5.78041e-05	4.43001e-05	4.41193e-05	4.7225e-05	4.32515e-05
Neuron_59	0.00016506	0.000155404	0.000140017	9.48287e-05	7.80588e-05	6.41483e-05	5.85837e-05	5.88345e-05	4.65094e-05	4.39435e-05	4.82743e-05	4.30566e-05	3.90769e-05	4.15329e-05	4.52368e-05	4.18647e-05	3.81253e-05	3.43092e-05	3.74343e-05	3.85386e-05	3.55833e-05	3.83363e-05	3.22316e-05	3.07002e-05	3.41999e-05	3.18007e-05	3.65305e-05	2.99499e-05	3.16403e-05	3.10434e-05	3.15917e-05	3.14956e-05	3.13132e-05	2.72604e-05	2.6931e-05	3.0791e-05	2.89723e-05	2.76159e-05	3.11284e-05	2.55918e-05	3.04377e-05	2.62204e-05	2.59117e-05	2.68401e-05	2.80427e-05	2.35514e-05	2.16987e-05	2.48408e-05	2.32922e-05
Neuron_60	0.000233828	0.000225153	0.000190687	0.000136884	0.000119526	0.000110419	9.87607e-05	9.13579e-05	8.14454e-05	8.51228e-05	8.07347e-05	7.61004e-05	6.29933e-05	7.47401e-05	7.58164e-05	6.93931e-05	6.76304e-05	6.34997e-05	6.65061e-05	6.51749e-05	6.32371e-05	6.59371e-05	5.44345e-05	5.55609e-05	6.5006e-05	5.5412e-05	6.06373e-05	4.94533e-05	5.51396e-05	5.30404e-05	5.36162e-05	5.79591e-05	5.32229e-05	4.75932e-05	4.54155e-05	4.98426e-05	4.83554e-05	4.50095e-05	5.01275e-05	4.66066e-05	5.4588e-05	5.70778e-05	5.21276e-05	4.53786e-05	4.57127e-05	3.8649e-05	3.96573e-05	4.35081e-05	3.85309e-05
Neuron_61	0.000263743	0.000280374	0.000253432	0.000208359	0.000183958	0.000169337	0.000141877	0.000137955	0.000120161	0.000117328	0.000121396	0.000101681	9.45271e-05	9.88407e-05	0.000102273	0.000110897	9.85546e-05	9.57716e-05	8.9243e-05	9.32501e-05	8.3549e-05	8.77721e-05	7.70153e-05	8.183e-05	0.000101619	8.7617e-05	9.66464e-05	7.19072e-05	8.41126e-05	7.71824e-05	7.05583e-05	9.39162e-05	8.21944e-05	7.39088e-05	7.72147e-05	7.45632e-05	6.97376e-05	6.21208e-05	6.95105e-05	6.92119e-05	7.59284e-05	8.49478e-05	8.08798e-05	5.84296e-05	6.20586e-05	5.97971e-05	6.13835e-05	5.98728e-05	5.95795e-05
Neuron_62	0.000286727	0.000286265	0.000241854	0.000166536	0.000133785	0.00011955	9.88149e-05	9.41082e-05	7.92071e-05	7.41312e-05	7.76446e-05	6.54197e-05	5.9244e-05	6.58938e-05	7.96065e-05	7.21966e-05	5.56766e-05	5.11959e-05	5.66049e-05	5.96954e-05	5.6235e-05	5.59923e-05	5.14939e-05	5.05847e-05	5.54415e-05	5.13491e-05	5.49598e-05	4.77493e-05	4.43552e-05	4.88836e-05	4.57291e-05	5.94405e-05	5.02359e-05	4.34353e-05	4.19913e-05	4.4462e-05	4.67353e-05	4.09268e-05	4.35113e-05	3.91162e-05	4.69775e-05	3.93942e-05	3.75269e-05	3.55193e-05	3.83429e-05	3.51191e-05	3.01719e-05	3.67249e-05	3.64859e-05
Neuron_63	0.000295587	0.000245189	0.000213713	0.000157581	0.000144589	0.000122241	0.000107775	0.000103929	8.40206e-05	8.61821e-05	8.9137e-05	7.63022e-05	7.47829e-05	7.4197e-05	7.21813e-05	7.79078e-05	6.74451e-05	6.44181e-05	6.50719e-05	7.39203e-05	6.4668e-05	6.67051e-05	5.92652e-05	5.81857e-05	6.29929e-05	6.07401e-05	6.82746e-05	5.02693e-05	5.68807e-05	5.80626e-05	5.49252e-05	5.92735e-05	5.98413e-05	5.63979e-05	5.17513e-05	5.53378e-05	4.95512e-05	5.03182e-05	4.87213e-05	5.28894e-05	5.29146e-05	5.35523e-05	5.51571e-05	4.33891e-05	4.41462e-05	4.67781e-05	4.19362e-05	4.2458e-05	4.00621e-05
Neuron_64	0.000166993	0.000155847	0.000140758	0.000118023	0.000109892	9.80349e-05	7.97057e-05	7.60342e-05	6.9003e-05	6.35816e-05	7.36718e-05	6.22453e-05	5.83057e-05	6.37112e-05	7.33551e-05	6.30809e-05	6.03441e-05	5.2281e-05	5.55199e-05	5.58117e-05	5.04279e-05	5.47393e-05	5.08047e-05	5.01702e-05	5.37445e-05	5.0996e-05	5.33644e-05	4.47409e-05	4.96952e-05	4.71422e-05	4.72974e-05	5.57526e-05	5.25982e-05	4.84883e-05	4.70132e-05	4.62109e-05	4.52274e-05	4.11154e-05	4.25147e-05	4.12291e-05	4.90517e-05	4.49134e-05	4.45289e-05	3.51716e-05	3.77318e-05	4.0574e-05	3.43874e-05	3.7046e-05	3.67449e-05
Neuron_65	0.000260354	0.00018938	0.000173115	0.000132256	0.000112914	0.000104895	8.9831e-05	8.79176e-05	7.13593e-05	7.40529e-05	7.05904e-05	6.8972e-05	5.66767e-05	6.65975e-05	6.5731e-05	6.63736e-05	6.52854e-05	6.25869e-05	6.08448e-05	5.96826e-05	5.54315e-05	5.98501e-05	5.05182e-05	5.23043e-05	6.40482e-05	5.20727e-05	5.71001e-05	4.98421e-05	5.34338e-05	4.80113e-05	4.54677e-05	5.26104e-05	4.55951e-05	4.32236e-05	4.50489e-05	5.37706e-05	4.28409e-05	4.36396e-05	4.98594e-05	4.34434e-05	4.67944e-05	4.76882e-05	4.82468e-05	4.41065e-05	4.69593e-05	3.64239e-05	3.83205e-05	4.24991e-05	3.67158e-05
Neuron_66	0.000204238	0.000190045	0.000170332	0.000119444	9.54299e-05	8.1027e-05	6.69465e-05	6.26181e-05	5.59533e-05	5.49702e-05	5.569e-05	4.81907e-05	4.4984e-05	4.89395e-05	4.97209e-05	4.46969e-05	3.87665e-05	3.90565e-05	4.07598e-05	4.57043e-05	4.24351e-05	4.27802e-05	3.62896e-05	3.6239e-05	4.01262e-05	3.61468e-05	4.376e-05	2.85561e-05	3.12109e-05	3.6298e-05	3.48179e-05	3.60363e-05	3.5829e-05	3.21608e-05	2.74309e-05	3.4834e-05	2.92712e-05	2.86769e-05	3.26985e-05	3.02396e-05	3.34066e-05	3.2892e-05	3.32816e-05	2.82645e-05	2.69503e-05	2.57614e-05	2.25939e-05	2.7986e-05	2.41428e-05
Neuron_67	0.000268569	0.000229865	0.000206997	0.000141744	0.000118953	0.00010885	9.32069e-05	9.00687e-05	7.29056e-05	7.67682e-05	7.62995e-05	6.89227e-05	5.76861e-05	6.83786e-05	7.13376e-05	6.69988e-05	6.28153e-05	6.11971e-05	6.06006e-05	6.25167e-05	5.76129e-05	6.17309e-05	5.0759e-05	5.12727e-05	6.1903e-05	5.00644e-05	5.64657e-05	4.99326e-05	5.10714e-05	4.6335e-05	4.5444e-05	5.09482e-05	4.45359e-05	4.42812e-05	4.15583e-05	4.97498e-05	4.32535e-05	4.36891e-05	4.90102e-05	4.30304e-05	4.69937e-05	4.54028e-05	4.52326e-05	4.31465e-05	4.57829e-05	3.61315e-05	3.66376e-05	4.08746e-05	3.60346e-05
Neuron_68	0.000149401	0.000149736	0.000129295	0.000107151	9.78871e-05	8.58576e-05	6.84359e-05	6.57108e-05	6.00975e-05	5.61676e-05	6.15493e-05	5.31177e-05	4.97563e-05	5.38272e-05	6.18565e-05	5.56576e-05	5.16687e-05	4.55527e-05	4.70335e-05	4.70588e-05	4.43105e-05	4.7576e-05	4.18055e-05	4.34007e-05	4.62058e-05	4.35865e-05	4.54838e-05	3.79657e-05	4.25767e-05	4.05883e-05	4.08379e-05	4.92906e-05	4.40353e-05	3.88252e-05	3.86173e-05	4.09822e-05	3.81512e-05	3.64079e-05	3.79963e-05	3.50185e-05	3.99854e-05	3.66295e-05	3.74852e-05	3.10962e-05	3.42583e-05	3.26842e-05	2.96624e-05	3.24822e-05	3.06669e-05
Neuron_69	0.000260003	0.000238415	0.000215267	0.000167165	0.00014728	0.000126398	0.000107634	9.9746e-05	8.6845e-05	8.27075e-05	8.873e-05	7.8063e-05	7.68939e-05	8.19523e-05	8.85264e-05	7.76007e-05	7.48297e-05	6.41311e-05	6.82082e-05	7.03784e-05	6.5696e-05	7.24677e-05	6.29734e-05	6.08393e-05	6.88804e-05	6.39076e-05	6.92802e-05	5.19687e-05	6.16349e-05	5.90912e-05	5.92666e-05	6.81433e-05	6.47023e-05	5.53343e-05	5.44179e-05	5.69377e-05	5.54883e-05	5.18564e-05	5.42827e-05	4.9014e-05	5.95152e-05	5.16607e-05	5.55642e-05	4.85187e-05	4.92317e-05	4.76623e-05	4.17852e-05	4.71388e-05	4.4651e-05
Neuron_70	0.000174355	0.000155985	0.000112895	8.15626e-05	7.05907e-05	6.37095e-05	4.68449e-05	5.15554e-05	3.9781e-05	3.537e-05	4.03568e-05	3.78848e-05	3.177e-05	3.49087e-05	3.98875e-05	3.94391e-05	3.44019e-05	3.24594e-05	3.29884e-05	3.11202e-05	3.12531e-05	3.39491e-05	2.76304e-05	2.91674e-05	3.25118e-05	2.8326e-05	3.01624e-05	2.60227e-05	2.79916e-05	2.69012e-05	2.55017e-05	3.04989e-05	2.55452e-05	2.25775e-05	2.44444e-05	2.96598e-05	2.27684e-05	2.25172e-05	2.79451e-05	2.37341e-05	2.4912e-05	2.29858e-05	2.28545e-05	2.35872e-05	2.55178e-05	1.90034e-05	1.92849e-05	2.27974e-05	2.11242e-05
Neuron_71	0.000238232	0.0001714	0.00015491	0.000121151	0.000105381	8.85083e-05	7.66741e-05	8.00586e-05	6.47408e-05	6.20247e-05	6.86571e-05	6.39522e-05	5.67991e-05	5.92384e-05	6.00203e-05	6.08446e-05	5.78459e-05	5.49906e-05	5.59576e-05	5.87933e-05	4.97264e-05	5.27069e-05	4.9045e-05	4.82571e-05	5.36045e-05	4.99001e-05	5.66923e-05	4.54093e-05	4.87745e-05	4.66335e-05	4.28983e-05	4.70281e-05	4.80651e-05	4.29769e-05	4.54993e-05	5.08778e-05	3.91811e-05	3.92776e-05	4.55431e-05	4.39489e-05	4.45881e-05	4.32294e-05	4.65414e-05	3.73082e-05	3.95876e-05	3.72211e-05	3.36482e-05	3.73002e-05	3.34697e-05
Neuron_72	0.000202768	0.000203343	0.000198702	0.000151845	0.000115001	0.000113476	9.76459e-05	9.40627e-05	8.15719e-05	7.44781e-05	8.77319e-05	7.77935e-05	6.20363e-05	7.18422e-05	8.01018e-05	7.31351e-05	6.73159e-05	6.44265e-05	6.87919e-05	6.45831e-05	5.81337e-05	5.84438e-05	5.58749e-05	5.28014e-05	7.22454e-05	5.69875e-05	6.41149e-05	5.46044e-05	5.57865e-05	4.98238e-05	5.43087e-05	5.68885e-05	4.83536e-05	4.87205e-05	5.03537e-05	5.21418e-05	4.57193e-05	4.21969e-05	5.41973e-05	3.91167e-05	5.76822e-05	5.60022e-05	4.92012e-05	4.24982e-05	4.47268e-05	4.02777e-05	3.65991e-05	4.56238e-05	4.42296e-05
Neuron_73	0.000236596	0.000218936	0.000191119	0.000145068	0.000115878	0.000105884	9.40371e-05	8.33008e-05	7.92367e-05	7.09733e-05	7.5489e-05	6.85538e-05	6.29813e-05	7.48261e-05	8.08735e-05	6.50692e-05	6.07637e-05	5.16141e-05	6.00087e-05	6.11244e-05	5.68028e-05	5.93057e-05	5.5381e-05	5.11146e-05	5.72363e-05	4.89011e-05	5.32663e-05	4.40266e-05	4.87095e-05	4.56822e-05	5.42212e-05	5.16629e-05	4.67141e-05	4.43735e-05	4.02979e-05	4.30465e-05	4.12888e-05	4.20264e-05	4.51265e-05	3.56586e-05	5.06224e-05	4.29164e-05	4.16752e-05	3.90104e-05	3.99393e-05	3.76308e-05	3.1629e-05	3.98766e-05	3.55029e-05
Neuron_74	0.000177337	0.000153554	0.000149125	0.00011617	9.8535e-05	8.67445e-05	8.02267e-05	7.35964e-05	5.77005e-05	5.77844e-05	6.06125e-05	5.04707e-05	4.59934e-05	4.74098e-05	4.44765e-05	5.32219e-05	4.55593e-05	4.41868e-05	4.38577e-05	4.60651e-05	3.94847e-05	4.1487e-05	3.545e-05	3.54369e-05	5.04852e-05	4.13852e-05	4.75098e-05	3.49917e-05	3.72472e-05	3.53864e-05	3.31146e-05	3.96158e-05	3.74733e-05	3.34911e-05	3.55454e-05	3.55742e-05	3.39779e-05	3.2808e-05	3.30445e-05	2.98847e-05	3.51102e-05	3.60401e-05	3.52999e-05	2.89611e-05	3.14984e-05	2.79394e-05	2.83003e-05	3.04639e-05	2.86154e-05
Neuron_75	0.000220367	0.000165427	0.000156644	0.000116983	0.000100683	8.24951e-05	7.59111e-05	6.53362e-05	5.43702e-05	5.53565e-05	4.98745e-05	4.49855e-05	4.27188e-05	4.44064e-05	4.3772e-05	4.78075e-05	3.50833e-05	3.61574e-05	3.74537e-05	4.36899e-05	4.19902e-05	4.28944e-05	3.30753e-05	3.22292e-05	3.84374e-05	3.28767e-05	4.17929e-05	2.75348e-05	2.76313e-05	3.289e-05	3.1829e-05	3.42302e-05	3.48732e-05	2.92172e-05	2.59054e-05	2.99535e-05	3.10644e-05	2.88789e-05	2.74253e-05	2.86876e-05	2.96412e-05	2.67037e-05	3.01138e-05	2.84436e-05	2.55037e-05	2.40371e-05	2.06171e-05	2.77552e-05	2.04027e-05
Neuron_76	0.00017996	0.000172288	0.000161755	0.00012864	0.000115014	0.000103052	8.97812e-05	8.541e-05	7.31116e-05	6.97066e-05	8.08163e-05	6.54003e-05	6.01301e-05	6.26043e-05	6.80068e-05	6.91216e-05	6.3846e-05	5.95809e-05	5.85446e-05	6.00053e-05	5.21565e-05	5.62586e-05	4.7959e-05	5.02423e-05	6.30352e-05	5.42747e-05	6.15403e-05	4.83353e-05	5.31897e-05	4.73806e-05	4.81921e-05	5.64958e-05	5.26305e-05	4.8904e-05	5.041e-05	4.88602e-05	4.66412e-05	4.28427e-05	4.50348e-05	4.12929e-05	4.93533e-05	5.03343e-05	4.88981e-05	3.72869e-05	4.07899e-05	4.01565e-05	3.78648e-05	4.03621e-05	3.75903e-05
Neuron_77	0.000395115	0.00035814	0.000327924	0.000223476	0.000178942	0.000160033	0.000144498	0.000125778	0.000113446	0.000111754	0.000110241	0.000102288	8.69202e-05	0.000106116	0.000113478	9.74364e-05	8.75885e-05	7.94913e-05	8.88099e-05	9.02801e-05	8.84709e-05	9.21368e-05	7.78026e-05	7.38683e-05	8.51593e-05	6.68829e-05	7.83312e-05	6.74665e-05	6.88671e-05	6.72011e-05	7.64565e-05	7.33885e-05	6.70136e-05	6.39729e-05	5.47714e-05	6.13472e-05	6.25662e-05	6.22121e-05	6.77215e-05	5.46705e-05	7.16509e-05	6.05764e-05	6.02675e-05	6.21254e-05	6.15489e-05	5.26307e-05	4.65527e-05	5.82665e-05	5.01838e-05
Neuron_78	0.000177459	0.000184997	0.000162219	0.000120938	9.1319e-05	7.96723e-05	6.22129e-05	6.2673e-05	5.71213e-05	4.74009e-05	5.66446e-05	4.91894e-05	4.52065e-05	4.9348e-05	5.99279e-05	4.56002e-05	4.41671e-05	3.78654e-05	4.18287e-05	4.0982e-05	3.78019e-05	4.00719e-05	3.62986e-05	3.43728e-05	3.73908e-05	3.23598e-05	3.78553e-05	3.41261e-05	3.55737e-05	3.30856e-05	3.6198e-05	3.63696e-05	3.33938e-05	3.04686e-05	2.70695e-05	3.28805e-05	3.11172e-05	3.00591e-05	3.47858e-05	2.61992e-05	3.43945e-05	2.73258e-05	2.78955e-05	2.65499e-05	2.95918e-05	2.61147e-05	2.21326e-05	2.70252e-05	2.48095e-05
Neuron_79	0.000208306	0.000197101	0.000172495	0.000126837	0.000121862	0.000107317	9.60538e-05	9.31018e-05	7.96017e-05	8.05873e-05	8.18562e-05	7.51553e-05	6.80279e-05	7.35697e-05	7.95801e-05	7.07338e-05	7.20521e-05	6.31957e-05	6.53848e-05	6.66847e-05	5.97511e-05	6.834e-05	5.74019e-05	5.71206e-05	6.34416e-05	5.77778e-05	6.30533e-05	5.37215e-05	6.00598e-05	5.6444e-05	5.344e-05	6.22808e-05	5.90568e-05	5.35793e-05	5.39016e-05	5.26553e-05	5.106e-05	4.65366e-05	5.04809e-05	5.02878e-05	5.66768e-05	5.64505e-05	5.62623e-05	4.56634e-05	4.57977e-05	4.512e-05	4.20703e-05	4.0698e-05	4.0795e-05
Neuron_80	0.00022978	0.000206742	0.000189463	0.000150541	0.000142915	0.000124205	0.000104473	0.000101805	9.02783e-05	8.73525e-05	9.53616e-05	8.06498e-05	7.61843e-05	8.36857e-05	9.51461e-05	8.12138e-05	7.81951e-05	6.86963e-05	7.12162e-05	7.76063e-05	6.75945e-05	7.26236e-05	6.96306e-05	6.73218e-05	6.96398e-05	6.66784e-05	7.28211e-05	5.91528e-05	6.56508e-05	6.40073e-05	6.06511e-05	7.26247e-05	7.0255e-05	6.49995e-05	6.21602e-05	6.0916e-05	5.83377e-05	5.2663e-05	5.58973e-05	5.72256e-05	6.21767e-05	5.95335e-05	5.95994e-05	4.67138e-05	4.89519e-05	5.40788e-05	4.39694e-05	4.66654e-05	4.7849e-05
Neuron_81	0.000151795	0.000135399	0.000134872	8.56918e-05	7.16747e-05	6.25337e-05	5.85535e-05	5.57595e-05	4.13248e-05	4.4671e-05	4.10069e-05	3.95593e-05	3.60124e-05	4.20969e-05	4.14648e-05	3.46233e-05	3.59762e-05	3.22976e-05	3.38172e-05	3.26588e-05	3.45064e-05	3.6549e-05	2.77288e-05	2.89882e-05	3.34306e-05	3.03901e-05	3.14258e-05	2.75344e-05	3.00871e-05	3.0007e-05	2.65211e-05	3.13222e-05	2.6165e-05	1.98531e-05	2.19592e-05	2.83591e-05	2.54106e-05	2.45512e-05	3.07322e-05	2.14047e-05	2.88917e-05	2.53425e-05	2.58923e-05	2.73916e-05	2.74228e-05	1.70097e-05	2.10341e-05	2.15018e-05	2.04953e-05
Neuron_82	0.000212213	0.000161087	0.000154629	0.000123554	0.000110791	0.000101737	8.38075e-05	8.29991e-05	6.61603e-05	6.99363e-05	7.08463e-05	6.28214e-05	5.49258e-05	5.69362e-05	5.58337e-05	6.49568e-05	6.06175e-05	5.95561e-05	5.55929e-05	5.52427e-05	5.07154e-05	5.33923e-05	4.50948e-05	4.96892e-05	6.17821e-05	5.23147e-05	5.88881e-05	4.3802e-05	5.21269e-05	4.90423e-05	3.9531e-05	5.58421e-05	4.56863e-05	4.2968e-05	4.74257e-05	4.98104e-05	4.0849e-05	3.81174e-05	4.40945e-05	4.29213e-05	4.32606e-05	5.2391e-05	4.85332e-05	3.69408e-05	4.07816e-05	3.51593e-05	3.88208e-05	3.57496e-05	3.62294e-05
Neuron_83	0.000344696	0.000351542	0.000308467	0.000241057	0.000201725	0.000182017	0.000137313	0.000137668	0.000121842	0.000112683	0.000129726	0.000107779	9.85769e-05	0.000106603	0.000116383	0.000114288	0.000105246	0.000100423	9.61716e-05	9.55673e-05	8.75688e-05	9.33274e-05	7.92576e-05	8.58644e-05	0.000102346	8.84907e-05	9.72247e-05	7.73151e-05	8.85506e-05	7.90576e-05	7.70935e-05	9.57792e-05	8.40049e-05	7.7327e-05	7.71129e-05	8.43195e-05	7.49941e-05	7.20074e-05	8.21529e-05	7.19586e-05	7.95628e-05	7.93661e-05	7.82973e-05	6.19758e-05	7.38626e-05	6.23571e-05	6.4022e-05	6.4512e-05	6.0791e-05
Neuron_84	0.000220387	0.000214768	0.000196207	0.000136721	0.000117376	0.000100371	9.06642e-05	8.44295e-05	6.97982e-05	6.87993e-05	6.75582e-05	5.67225e-05	5.63885e-05	5.6258e-05	6.10258e-05	6.38851e-05	5.38026e-05	4.71681e-05	4.87804e-05	5.55162e-05	4.80637e-05	4.9672e-05	4.61671e-05	4.48706e-05	5.07866e-05	4.75775e-05	5.15535e-05	4.06948e-05	4.31811e-05	4.35354e-05	4.21572e-05	4.84343e-05	4.47386e-05	4.05689e-05	4.15587e-05	4.09389e-05	4.06922e-05	3.84011e-05	3.58259e-05	3.56279e-05	4.07113e-05	3.91942e-05	3.84273e-05	3.14775e-05	3.33016e-05	3.39159e-05	3.06275e-05	3.47687e-05	3.06863e-05
Neuron_85	0.00011416	0.000109698	9.04622e-05	6.65228e-05	5.51257e-05	5.16102e-05	4.31604e-05	4.15744e-05	3.41858e-05	3.26319e-05	3.52238e-05	3.02024e-05	2.6815e-05	2.93895e-05	3.09426e-05	3.31042e-05	2.76727e-05	2.73257e-05	2.63846e-05	2.80185e-05	2.44472e-05	2.50482e-05	2.31281e-05	2.27898e-05	2.94095e-05	2.3405e-05	2.66186e-05	2.18693e-05	2.27214e-05	2.00895e-05	2.03733e-05	2.29964e-05	2.05053e-05	2.09765e-05	2.15144e-05	2.20957e-05	1.86495e-05	1.91584e-05	2.15326e-05	1.90038e-05	2.09938e-05	2.10211e-05	2.01471e-05	1.72058e-05	1.93851e-05	1.75637e-05	1.6873e-05	1.75305e-05	1.69688e-05
Neuron_86	0.00026816	0.000226692	0.000210151	0.00015856	0.000147415	0.000129344	0.000113087	0.000103094	8.60191e-05	8.9606e-05	8.66872e-05	7.78703e-05	7.28957e-05	7.81902e-05	7.56196e-05	8.22312e-05	7.34831e-05	7.04209e-05	6.76413e-05	7.21825e-05	6.73798e-05	7.11447e-05	5.47198e-05	5.89511e-05	7.02421e-05	6.34566e-05	6.85119e-05	5.49656e-05	6.18121e-05	5.59949e-05	5.23115e-05	6.64356e-05	5.97478e-05	5.38898e-05	5.3817e-05	5.65661e-05	5.41241e-05	5.3484e-05	5.27199e-05	5.19803e-05	5.43405e-05	5.62783e-05	5.5951e-05	4.73804e-05	5.10538e-05	4.47423e-05	4.59408e-05	4.36174e-05	4.06265e-05
Neuron_87	0.000137912	0.000147945	0.00012761	9.99376e-05	8.1838e-05	7.26171e-05	6.48855e-05	6.11261e-05	5.48755e-05	4.66154e-05	5.41925e-05	4.88073e-05	4.45214e-05	4.99249e-05	5.86435e-05	4.76807e-05	4.45758e-05	3.75912e-05	4.32992e-05	4.3181e-05	3.78683e-05	3.97797e-05	3.95958e-05	3.49046e-05	3.96123e-05	3.82272e-05	3.89132e-05	3.28289e-05	3.6561e-05	3.41372e-05	3.56333e-05	3.89103e-05	3.43237e-05	3.13192e-05	3.18321e-05	3.15542e-05	3.17342e-05	2.8745e-05	3.39253e-05	2.5476e-05	3.72507e-05	3.22126e-05	2.90367e-05	2.63486e-05	2.98388e-05	2.71842e-05	2.29337e-05	2.71215e-05	2.62302e-05
Neuron_88	0.000122272	0.000119732	0.000115915	8.10738e-05	6.10808e-05	5.66234e-05	4.79872e-05	4.39804e-05	3.73497e-05	3.90229e-05	3.83441e-05	3.62395e-05	3.02802e-05	3.71432e-05	4.41559e-05	3.13138e-05	3.21016e-05	2.70052e-05	3.08149e-05	2.99628e-05	2.85196e-05	2.84634e-05	2.64647e-05	2.48691e-05	2.75277e-05	2.2709e-05	2.388e-05	2.48299e-05	2.54805e-05	2.1649e-05	2.55464e-05	2.55078e-05	2.1772e-05	2.18066e-05	1.71564e-05	2.06718e-05	2.03277e-05	1.924e-05	2.42705e-05	1.70021e-05	2.6395e-05	2.26458e-05	2.07201e-05	1.99939e-05	2.02598e-05	1.75742e-05	1.66478e-05	1.78841e-05	1.71877e-05
Neuron_89	0.000392562	0.000347169	0.000322772	0.000245712	0.000207976	0.000184781	0.000162389	0.000146388	0.000130732	0.000120215	0.000131045	0.000113519	0.000102693	0.000115402	0.000122281	0.000112112	0.000104338	9.3133e-05	0.000101152	9.99021e-05	9.33876e-05	9.83069e-05	8.85788e-05	8.78377e-05	0.000105164	9.21469e-05	0.000101203	7.79893e-05	8.46626e-05	8.48268e-05	8.4633e-05	9.88376e-05	8.71819e-05	7.63794e-05	7.9417e-05	7.96601e-05	7.8223e-05	6.90289e-05	7.83776e-05	6.32027e-05	8.69849e-05	7.75996e-05	7.76538e-05	6.57899e-05	6.84549e-05	6.3283e-05	5.75349e-05	6.82405e-05	6.5272e-05
Neuron_90	0.000327752	0.000310534	0.000252373	0.000187718	0.000162373	0.000149171	0.000128256	0.000119116	0.000101508	0.000107497	0.000100321	8.89588e-05	8.64621e-05	8.89217e-05	8.71533e-05	9.13173e-05	8.0287e-05	7.56883e-05	7.57591e-05	8.45823e-05	7.66807e-05	7.67762e-05	6.67886e-05	6.77656e-05	7.32671e-05	7.24822e-05	7.57385e-05	5.88357e-05	6.68176e-05	6.62165e-05	6.62968e-05	7.19636e-05	6.59906e-05	6.34444e-05	5.79813e-05	6.40272e-05	5.75093e-05	6.03039e-05	5.51663e-05	6.03028e-05	6.46929e-05	6.94271e-05	6.47274e-05	5.14235e-05	5.06874e-05	5.30012e-05	5.10431e-05	5.13608e-05	4.71396e-05
Neuron_91	0.000266065	0.00025879	0.000229534	0.000181202	0.000160008	0.000145541	0.000129051	0.000122816	0.00010467	0.000106005	0.000104007	9.35283e-05	8.84781e-05	9.03625e-05	8.55473e-05	9.1614e-05	8.79111e-05	8.35578e-05	8.13697e-05	8.51775e-05	7.70494e-05	7.80792e-05	6.99164e-05	7.06948e-05	8.11386e-05	8.17639e-05	8.29891e-05	6.23542e-05	7.56877e-05	7.00676e-05	6.46947e-05	7.70236e-05	7.05391e-05	6.45471e-05	6.66709e-05	7.02554e-05	5.969e-05	5.81619e-05	6.4217e-05	6.02835e-05	7.02626e-05	7.79466e-05	7.09271e-05	5.39338e-05	5.55438e-05	5.33314e-05	5.49321e-05	5.34033e-05	5.29257e-05
Neuron_92	0.000147713	0.00014574	0.000134917	0.000110004	9.29805e-05	8.5735e-05	7.02146e-05	6.72823e-05	6.18909e-05	5.36356e-05	6.46031e-05	5.57517e-05	5.09608e-05	5.60578e-05	6.64623e-05	5.54021e-05	5.24342e-05	4.52139e-05	4.98072e-05	4.87626e-05	4.32454e-05	4.52992e-05	4.2938e-05	4.23676e-05	4.79783e-05	4.36506e-05	4.55735e-05	3.91218e-05	4.36646e-05	3.92905e-05	4.33156e-05	4.83946e-05	4.26401e-05	3.99397e-05	3.72416e-05	3.9843e-05	3.78211e-05	3.67449e-05	3.89969e-05	3.17812e-05	4.29324e-05	3.92323e-05	3.72129e-05	2.99264e-05	3.37584e-05	3.4316e-05	2.87896e-05	3.32566e-05	3.21732e-05
Neuron_93	0.000151563	0.000137467	0.000125444	9.06304e-05	8.30847e-05	6.96102e-05	6.35106e-05	5.66717e-05	5.01067e-05	5.02879e-05	4.87683e-05	4.38782e-05	4.00913e-05	4.44716e-05	4.52137e-05	4.60049e-05	4.00932e-05	3.8951e-05	3.8591e-05	4.0905e-05	3.98345e-05	4.26051e-05	3.31542e-05	3.47222e-05	3.96744e-05	3.43473e-05	3.96982e-05	3.03385e-05	3.33093e-05	3.33513e-05	3.28423e-05	3.81612e-05	3.5702e-05	3.01461e-05	2.98875e-05	3.18998e-05	3.12503e-05	3.01741e-05	3.04763e-05	2.8927e-05	3.12218e-05	3.00001e-05	3.11786e-05	2.8649e-05	2.91466e-05	2.51222e-05	2.41616e-05	2.68152e-05	2.3406e-05
Neuron_94	0.000298439	0.000237214	0.000228479	0.000200952	0.000185533	0.00017182	0.000145551	0.000133889	0.000118002	0.000127551	0.000123209	0.000111671	0.000102926	0.000109324	0.000111063	0.000114085	0.000106231	9.87166e-05	9.76953e-05	9.95377e-05	9.57528e-05	9.29087e-05	8.05327e-05	8.55387e-05	0.00010102	8.94681e-05	9.74229e-05	7.26892e-05	8.84083e-05	8.19948e-05	8.22164e-05	9.37496e-05	8.07836e-05	8.2172e-05	7.7311e-05	8.21133e-05	7.26001e-05	7.48013e-05	7.28868e-05	7.20646e-05	8.00305e-05	9.28455e-05	8.35043e-05	6.31638e-05	6.63891e-05	6.7706e-05	6.71748e-05	6.57912e-05	6.29992e-05
Neuron_95	0.00018405	0.00013518	0.000121159	8.82905e-05	7.5807e-05	6.17206e-05	5.50838e-05	5.40826e-05	4.21017e-05	4.05447e-05	4.24373e-05	3.94187e-05	3.95254e-05	4.0246e-05	3.86332e-05	3.68594e-05	3.40204e-05	3.01568e-05	3.34058e-05	3.63212e-05	3.24129e-05	3.45838e-05	3.09218e-05	2.9079e-05	3.09632e-05	3.07447e-05	3.36276e-05	2.41018e-05	2.84022e-05	2.98539e-05	2.74155e-05	2.97973e-05	2.85067e-05	2.43779e-05	2.3935e-05	2.88024e-05	2.39693e-05	2.40004e-05	2.69847e-05	2.43055e-05	2.68945e-05	2.38492e-05	2.65902e-05	2.39186e-05	2.30563e-05	2.10636e-05	1.96445e-05	2.13765e-05	2.03277e-05
Neuron_96	0.000245574	0.000230776	0.000204416	0.00014898	0.000124909	0.000108034	9.38721e-05	8.52548e-05	7.3291e-05	6.80643e-05	7.3295e-05	6.43928e-05	5.91731e-05	6.4861e-05	6.98298e-05	6.35223e-05	5.6364e-05	5.08366e-05	5.64387e-05	5.87372e-05	5.28157e-05	5.50164e-05	4.95419e-05	4.56285e-05	5.30465e-05	5.0012e-05	5.19347e-05	4.56335e-05	4.52068e-05	4.57257e-05	4.31192e-05	5.02134e-05	4.73154e-05	4.27233e-05	4.2462e-05	4.36347e-05	4.41912e-05	3.9763e-05	4.48683e-05	3.62142e-05	4.71475e-05	4.02311e-05	3.89315e-05	3.66347e-05	3.90128e-05	3.50694e-05	3.08465e-05	3.49727e-05	3.33207e-05
Neuron_97	0.000227793	0.000204818	0.000190974	0.000151451	0.000132675	0.000115617	9.59048e-05	9.4015e-05	8.29926e-05	7.99002e-05	8.45865e-05	7.10975e-05	6.62506e-05	6.83152e-05	7.20443e-05	7.2062e-05	6.27628e-05	6.29879e-05	6.09048e-05	6.3838e-05	5.8135e-05	6.07224e-05	5.30258e-05	5.48331e-05	6.21009e-05	5.69597e-05	6.32526e-05	4.81352e-05	5.28116e-05	5.25714e-05	4.84715e-05	5.77793e-05	5.47414e-05	5.10511e-05	4.83577e-05	4.88715e-05	4.60001e-05	4.3159e-05	4.55434e-05	4.79225e-05	4.91728e-05	5.27986e-05	5.16268e-05	3.90918e-05	3.99473e-05	4.05783e-05	3.88924e-05	3.96008e-05	3.7623e-05
Neuron_98	0.000230764	0.000223725	0.000164541	0.000119469	9.71767e-05	9.16071e-05	6.32374e-05	7.3424e-05	5.90797e-05	5.28109e-05	6.0909e-05	5.30957e-05	4.67656e-05	5.14637e-05	5.38706e-05	5.76389e-05	5.25238e-05	5.25002e-05	4.72382e-05	4.95559e-05	4.61842e-05	4.92994e-05	4.12459e-05	4.40183e-05	4.95065e-05	4.28918e-05	4.49715e-05	4.03778e-05	4.46155e-05	4.00848e-05	3.46918e-05	4.467e-05	3.88984e-05	3.51469e-05	3.76828e-05	4.5001e-05	3.30913e-05	3.34767e-05	4.53841e-05	3.80821e-05	3.70139e-05	3.80744e-05	3.70139e-05	3.49076e-05	3.92644e-05	2.87636e-05	3.1223e-05	3.25515e-05	3.14718e-05
Neuron_99	0.000292604	0.000244404	0.000229542	0.000160188	0.000130189	0.000113334	9.43592e-05	9.5037e-05	8.18693e-05	7.35369e-05	8.40788e-05	7.47138e-05	6.56141e-05	7.64526e-05	8.19979e-05	7.03143e-05	6.74647e-05	6.54507e-05	6.67385e-05	6.86446e-05	6.34753e-05	6.96246e-05	5.8604e-05	5.92237e-05	6.57413e-05	5.78183e-05	6.46197e-05	5.47253e-05	5.53552e-05	5.62862e-05	5.16984e-05	5.67336e-05	5.46246e-05	4.67792e-05	4.90099e-05	5.61281e-05	4.86951e-05	4.56414e-05	5.75107e-05	4.72891e-05	5.35732e-05	4.4885e-05	5.01927e-05	4.82628e-05	5.16731e-05	4.03228e-05	3.74553e-05	4.55868e-05	3.88472e-05
Neuron_100	0.000186022	0.000189838	0.000147338	0.00010006	7.96066e-05	7.11702e-05	6.22328e-05	6.01758e-05	5.32159e-05	4.85996e-05	4.90122e-05	4.42508e-05	4.09302e-05	4.37038e-05	4.87011e-05	4.48537e-05	3.92851e-05	3.62965e-05	3.83238e-05	4.18515e-05	3.55244e-05	4.04109e-05	3.58701e-05	3.37379e-05	3.84836e-05	3.14841e-05	3.8561e-05	3.15173e-05	3.20015e-05	3.20116e-05	3.35344e-05	3.45798e-05	3.60917e-05	2.96561e-05	2.99453e-05	2.99654e-05	2.95702e-05	2.51231e-05	2.91424e-05	2.79841e-05	3.29475e-05	2.94054e-05	3.11987e-05	2.72811e-05	2.54848e-05	2.51889e-05	2.15478e-05	2.63303e-05	2.42411e-05
Neuron_101	0.000160758	0.000145495	0.000128472	9.6497e-05	8.54725e-05	7.9699e-05	7.23177e-05	6.62535e-05	5.75346e-05	6.15244e-05	5.75168e-05	5.56649e-05	4.625e-05	5.4743e-05	5.52688e-05	5.26889e-05	5.21933e-05	4.77055e-05	4.90091e-05	4.82628e-05	4.6394e-05	4.87257e-05	3.97326e-05	4.15072e-05	5.06338e-05	4.21182e-05	4.62563e-05	3.74917e-05	4.27479e-05	3.93515e-05	3.81519e-05	4.42027e-05	3.83913e-05	3.41017e-05	3.51196e-05	3.95735e-05	3.62652e-05	3.48794e-05	3.92814e-05	3.44622e-05	3.90684e-05	4.14862e-05	3.91235e-05	3.525e-05	3.63602e-05	2.857e-05	3.06161e-05	3.34805e-05	2.94096e-05
Neuron_102	0.000376279	0.000298614	0.000272697	0.000217588	0.00017693	0.000160575	0.00013975	0.000133733	0.000105077	9.87297e-05	0.000104075	9.4644e-05	8.59895e-05	9.02207e-05	8.88253e-05	9.82684e-05	8.39243e-05	8.47065e-05	8.30251e-05	8.39111e-05	7.53338e-05	7.53745e-05	7.09619e-05	6.92983e-05	9.25798e-05	8.05342e-05	8.39049e-05	6.90095e-05	7.04826e-05	6.74682e-05	5.91641e-05	7.36622e-05	6.66805e-05	5.73017e-05	6.76582e-05	7.14557e-05	6.02255e-05	5.7677e-05	6.69427e-05	5.6814e-05	6.53448e-05	5.99973e-05	6.48948e-05	5.50936e-05	6.12991e-05	5.0449e-05	5.02807e-05	5.82093e-05	5.12324e-05
Neuron_103	0.000222606	0.000231764	0.000184443	0.000134236	9.74833e-05	8.18293e-05	5.61898e-05	6.27274e-05	5.66699e-05	4.53733e-05	4.94526e-05	4.2317e-05	3.61157e-05	4.01941e-05	5.13939e-05	4.57805e-05	3.61097e-05	3.38549e-05	3.59246e-05	3.54265e-05	3.51007e-05	3.58809e-05	3.1988e-05	3.38144e-05	3.61079e-05	3.32978e-05	3.62514e-05	2.79833e-05	2.8933e-05	3.37808e-05	2.98542e-05	3.93218e-05	3.16532e-05	2.52749e-05	2.57888e-05	3.0853e-05	2.6995e-05	2.39938e-05	3.16794e-05	2.60804e-05	2.93589e-05	2.75868e-05	2.49247e-05	2.27849e-05	2.59644e-05	1.96748e-05	1.94632e-05	2.47693e-05	2.35002e-05
Neuron_104	0.000230575	0.000228056	0.000192244	0.000141253	0.000124982	0.00010552	9.61953e-05	9.14637e-05	7.85046e-05	7.63157e-05	7.25856e-05	6.50732e-05	6.05228e-05	6.38437e-05	6.6138e-05	6.76073e-05	6.058e-05	5.43443e-05	5.63236e-05	6.16258e-05	5.3478e-05	5.83579e-05	5.25733e-05	5.10727e-05	5.63601e-05	5.26242e-05	5.86208e-05	4.48115e-05	4.94372e-05	5.05716e-05	4.77335e-05	5.46925e-05	5.24916e-05	4.46822e-05	4.61219e-05	4.84366e-05	4.47027e-05	4.1921e-05	4.3084e-05	4.17539e-05	4.77299e-05	4.76084e-05	4.68528e-05	3.86718e-05	3.90481e-05	3.79101e-05	3.50326e-05	4.02634e-05	3.55015e-05
Neuron_105	0.000298018	0.000247541	0.000236021	0.000172683	0.000157235	0.000133032	0.000122793	0.000112624	9.49783e-05	9.94948e-05	9.48884e-05	8.63778e-05	7.75301e-05	8.70568e-05	8.28482e-05	8.31382e-05	7.70156e-05	7.41134e-05	7.5007e-05	7.99149e-05	7.58358e-05	7.88075e-05	6.51436e-05	6.50268e-05	7.48109e-05	6.72931e-05	7.79695e-05	5.86583e-05	6.3834e-05	6.59947e-05	6.07884e-05	6.8328e-05	6.75332e-05	5.8637e-05	5.59553e-05	6.33466e-05	5.9151e-05	5.49676e-05	6.08243e-05	5.51679e-05	6.24109e-05	6.09133e-05	6.22548e-05	5.47487e-05	5.39186e-05	4.82165e-05	4.59037e-05	5.06592e-05	4.66819e-05
Neuron_106	0.000318563	0.000268023	0.000260838	0.000178481	0.000138377	0.000130233	0.000114821	0.000103861	8.3415e-05	9.072e-05	8.4834e-05	7.72876e-05	6.65047e-05	8.38896e-05	8.47776e-05	6.73194e-05	7.17475e-05	6.22583e-05	6.55961e-05	6.59995e-05	6.56396e-05	6.72774e-05	5.75873e-05	5.64056e-05	6.30665e-05	5.23899e-05	6.08287e-05	5.25479e-05	5.67645e-05	5.26755e-05	5.67635e-05	5.83169e-05	5.16144e-05	4.47537e-05	3.73702e-05	5.00953e-05	4.94129e-05	4.51059e-05	5.68615e-05	4.06533e-05	5.632e-05	4.61728e-05	4.89789e-05	4.96273e-05	4.94722e-05	3.67559e-05	3.81681e-05	4.0876e-05	3.87772e-05
Neuron_107	0.000150098	0.000140955	0.000118878	9.65404e-05	8.33706e-05	7.41363e-05	6.53927e-05	5.77508e-05	5.01223e-05	5.24491e-05	4.78946e-05	4.36824e-05	4.44139e-05	4.82621e-05	4.70643e-05	4.38881e-05	4.0302e-05	3.41067e-05	3.69307e-05	3.98104e-05	3.90132e-05	3.69677e-05	3.54038e-05	3.33139e-05	3.79125e-05	3.66157e-05	3.68713e-05	2.55309e-05	3.23379e-05	3.22528e-05	3.28627e-05	3.62452e-05	3.16517e-05	2.82958e-05	2.52199e-05	3.18403e-05	2.7334e-05	2.89138e-05	2.93598e-05	2.50644e-05	3.23595e-05	3.14176e-05	3.10936e-05	2.57831e-05	2.49976e-05	2.38899e-05	2.31466e-05	2.5429e-05	2.33005e-05
Neuron_108	0.000219541	0.00019282	0.00018666	0.000140114	0.000125328	0.000111221	9.86901e-05	8.82259e-05	7.69483e-05	8.27788e-05	7.54792e-05	6.9612e-05	6.25666e-05	7.11038e-05	6.97849e-05	6.67035e-05	6.49138e-05	5.94273e-05	6.03304e-05	6.04197e-05	6.06258e-05	6.20234e-05	5.21598e-05	5.23654e-05	6.17851e-05	5.3055e-05	5.80455e-05	4.49518e-05	5.24081e-05	5.03446e-05	4.95974e-05	5.69896e-05	5.06069e-05	4.57131e-05	4.24169e-05	4.74269e-05	4.49413e-05	4.32594e-05	4.60179e-05	4.34832e-05	5.00498e-05	5.47763e-05	5.0079e-05	4.31592e-05	4.13805e-05	3.78279e-05	3.82031e-05	4.00226e-05	3.80106e-05
Neuron_109	0.000156064	0.000138626	0.000118352	9.08922e-05	8.35897e-05	7.40574e-05	6.37209e-05	6.06371e-05	5.13603e-05	5.06929e-05	5.32557e-05	4.52995e-05	4.60378e-05	4.70644e-05	5.05335e-05	4.76654e-05	4.3963e-05	3.82783e-05	3.91269e-05	4.57634e-05	3.79025e-05	4.15365e-05	3.86358e-05	3.71288e-05	3.95734e-05	3.79746e-05	4.26792e-05	3.16112e-05	3.72389e-05	3.52443e-05	3.53644e-05	3.97358e-05	3.90493e-05	3.64685e-05	3.59993e-05	3.38934e-05	3.20227e-05	2.97421e-05	2.96458e-05	3.26947e-05	3.51139e-05	3.36545e-05	3.51024e-05	2.69231e-05	2.72908e-05	3.15642e-05	2.5426e-05	2.71425e-05	2.68887e-05
Neuron_110	0.000201853	0.000183106	0.000156284	0.000107871	8.85449e-05	7.11711e-05	6.42161e-05	6.03843e-05	4.98301e-05	4.90907e-05	4.78068e-05	4.21915e-05	3.68406e-05	4.45351e-05	4.93942e-05	4.25745e-05	3.49721e-05	3.40536e-05	3.7208e-05	3.94727e-05	3.89941e-05	4.18938e-05	3.39016e-05	3.19604e-05	3.56425e-05	3.01301e-05	3.703e-05	2.99948e-05	2.77738e-05	3.21945e-05	3.00438e-05	3.44677e-05	3.32324e-05	2.68904e-05	2.38136e-05	3.07153e-05	3.10165e-05	2.83262e-05	3.05927e-05	2.61997e-05	3.03724e-05	2.33151e-05	2.52885e-05	2.83064e-05	2.86063e-05	2.2079e-05	1.93914e-05	2.56596e-05	2.26254e-05
Neuron_111	0.000326248	0.00027571	0.000256039	0.000187138	0.000175308	0.000149652	0.000130681	0.000123338	0.00010476	0.000103078	0.000109632	9.63128e-05	9.15773e-05	9.76914e-05	0.000108249	9.46189e-05	8.69064e-05	7.71665e-05	8.3026e-05	9.55099e-05	8.04124e-05	8.69855e-05	8.03594e-05	7.89339e-05	7.98099e-05	7.65456e-05	9.05643e-05	6.53236e-05	7.27779e-05	7.50669e-05	7.29327e-05	7.95381e-05	8.12431e-05	7.09338e-05	6.85008e-05	7.13117e-05	6.67466e-05	6.1133e-05	6.58767e-05	6.69648e-05	6.94879e-05	6.37913e-05	7.0028e-05	5.73785e-05	5.74374e-05	6.05931e-05	4.80903e-05	5.8352e-05	5.17238e-05
Neuron_112	0.000212687	0.000184384	0.000174327	0.000127139	0.000106519	9.40622e-05	8.31304e-05	7.39218e-05	6.06069e-05	6.3561e-05	6.22395e-05	5.79312e-05	5.35559e-05	5.73599e-05	6.13264e-05	5.65596e-05	4.99916e-05	4.62871e-05	4.83961e-05	5.06918e-05	4.8125e-05	4.57917e-05	4.04942e-05	3.90344e-05	4.69095e-05	4.03083e-05	4.42543e-05	3.81329e-05	4.01388e-05	3.74563e-05	4.15065e-05	3.99974e-05	3.63207e-05	3.80378e-05	3.3803e-05	3.88061e-05	3.50671e-05	3.78773e-05	3.76792e-05	3.05867e-05	3.90792e-05	3.53113e-05	3.28141e-05	3.10106e-05	3.28811e-05	3.14944e-05	2.82372e-05	3.10556e-05	2.97574e-05
Neuron_113	0.000210877	0.000206742	0.000194861	0.000132921	9.97281e-05	9.30727e-05	8.41085e-05	7.45169e-05	6.06834e-05	6.12462e-05	5.9442e-05	5.4951e-05	4.82421e-05	5.71643e-05	6.00571e-05	5.27589e-05	4.84453e-05	4.28971e-05	4.74952e-05	4.85628e-05	4.72711e-05	4.5193e-05	4.11636e-05	3.82302e-05	4.6409e-05	3.93315e-05	4.26579e-05	3.73609e-05	3.92467e-05	3.48888e-05	3.85847e-05	3.95757e-05	3.50629e-05	3.23048e-05	2.90036e-05	3.37665e-05	3.37309e-05	3.12423e-05	3.8655e-05	2.71364e-05	4.0567e-05	3.47713e-05	3.29597e-05	3.30134e-05	3.38795e-05	2.64568e-05	2.63835e-05	2.89935e-05	2.74392e-05
Neuron_114	0.000143859	0.000140524	0.000115864	8.06978e-05	6.48805e-05	5.4895e-05	4.64988e-05	4.04656e-05	3.35721e-05	3.33932e-05	2.95888e-05	2.65673e-05	2.72925e-05	2.77674e-05	2.57223e-05	2.87088e-05	2.1581e-05	2.11009e-05	2.25185e-05	2.58015e-05	2.38777e-05	2.36016e-05	1.96693e-05	1.92158e-05	2.35463e-05	2.2916e-05	2.34521e-05	1.59977e-05	1.73876e-05	1.96341e-05	1.87191e-05	2.09436e-05	1.90821e-05	1.64498e-05	1.68097e-05	1.73095e-05	1.66932e-05	1.71693e-05	1.6613e-05	1.55324e-05	1.78487e-05	1.74463e-05	1.70856e-05	1.51595e-05	1.50702e-05	1.3403e-05	1.37816e-05	1.5092e-05	1.28634e-05
Neuron_115	0.000232724	0.000163401	0.000163632	0.000141406	0.00012835	0.000109084	9.34858e-05	8.99818e-05	7.70708e-05	7.55484e-05	7.95633e-05	6.63877e-05	6.22512e-05	6.50805e-05	7.09057e-05	6.89168e-05	6.54658e-05	5.9606e-05	5.79072e-05	6.07833e-05	5.38033e-05	5.79857e-05	5.35368e-05	5.38619e-05	5.95169e-05	5.63616e-05	6.1365e-05	4.8027e-05	5.4588e-05	5.32137e-05	4.81812e-05	6.0645e-05	5.42548e-05	5.016e-05	5.33442e-05	4.92881e-05	4.69786e-05	4.19912e-05	4.44649e-05	4.45397e-05	5.04441e-05	5.41385e-05	5.09899e-05	3.70965e-05	3.97562e-05	4.14099e-05	3.83098e-05	3.8936e-05	3.94823e-05
Neuron_116	0.000170091	0.000138165	0.000114613	9.69074e-05	8.2152e-05	7.6094e-05	6.05199e-05	6.38477e-05	5.43815e-05	4.63815e-05	5.75045e-05	5.18641e-05	4.72913e-05	4.89153e-05	6.18624e-05	5.21813e-05	4.91199e-05	4.27022e-05	4.58994e-05	4.71666e-05	3.80061e-05	4.09744e-05	4.28468e-05	4.06646e-05	4.32354e-05	3.88812e-05	4.31141e-05	3.77939e-05	4.04719e-05	3.65087e-05	3.65776e-05	4.04076e-05	3.88562e-05	3.83e-05	3.99494e-05	3.64129e-05	3.28789e-05	3.07143e-05	3.40139e-05	3.29214e-05	3.75419e-05	3.46606e-05	3.26827e-05	2.61357e-05	3.02276e-05	3.34691e-05	2.50233e-05	2.82135e-05	2.90472e-05
Neuron_117	0.000304986	0.000288445	0.000262644	0.000210467	0.000196646	0.000189716	0.000151536	0.000152014	0.000130924	0.000139831	0.000137507	0.000123466	0.000107212	0.000120578	0.000121348	0.000125474	0.000125202	0.000119294	0.00011023	0.000112939	0.000104214	0.000108422	9.16808e-05	0.000100815	0.000117637	0.000102186	0.00010931	8.78984e-05	0.000106525	9.28228e-05	8.02721e-05	0.000108904	9.17979e-05	8.73548e-05	8.95584e-05	9.53093e-05	8.07616e-05	7.75705e-05	9.06481e-05	8.8727e-05	8.84372e-05	0.000107241	9.62829e-05	7.57379e-05	8.26925e-05	7.06251e-05	7.75018e-05	6.96615e-05	6.99369e-05
Neuron_118	0.000333253	0.00029997	0.000270503	0.000212239	0.000197122	0.00017252	0.000146727	0.000143254	0.00012692	0.000123206	0.000128886	0.000112295	0.000103099	0.000113698	0.000116671	0.000113663	0.000109032	0.000102912	0.000100419	0.000102197	9.47691e-05	0.000104537	8.68979e-05	8.99679e-05	0.000103612	9.22195e-05	0.000102329	7.90057e-05	9.24623e-05	8.73948e-05	8.19406e-05	9.90502e-05	9.22194e-05	8.2153e-05	8.15067e-05	8.45664e-05	7.88198e-05	7.434e-05	8.09171e-05	7.76132e-05	8.31582e-05	8.8704e-05	8.68105e-05	7.01234e-05	7.37329e-05	6.77675e-05	6.72565e-05	6.75585e-05	6.3589e-05
Neuron_119	0.000255403	0.000221835	0.000215464	0.000174084	0.000146906	0.00013925	0.0001236	0.00011847	9.98195e-05	9.8191e-05	0.000106234	9.76355e-05	8.09756e-05	8.70999e-05	9.48808e-05	9.22455e-05	8.78779e-05	8.48528e-05	8.49535e-05	8.14365e-05	7.26697e-05	7.37794e-05	7.16034e-05	6.8015e-05	9.0827e-05	7.18404e-05	8.0966e-05	6.88259e-05	7.23362e-05	6.31382e-05	6.75598e-05	6.98751e-05	6.3828e-05	6.57951e-05	6.64644e-05	6.92553e-05	5.75079e-05	5.68795e-05	6.50188e-05	5.34154e-05	6.88768e-05	6.98133e-05	6.39381e-05	5.3323e-05	5.67185e-05	5.51967e-05	4.99752e-05	5.71519e-05	5.65499e-05
Neuron_120	0.000278948	0.000252067	0.000226461	0.000163046	0.000132759	0.000126086	0.000100287	0.000102397	8.91126e-05	9.04263e-05	9.49295e-05	8.36232e-05	6.88527e-05	8.04781e-05	8.47397e-05	8.10162e-05	7.86945e-05	7.55488e-05	7.43824e-05	7.43591e-05	6.60865e-05	6.87622e-05	6.11229e-05	6.52989e-05	7.58539e-05	6.35872e-05	7.00613e-05	5.99693e-05	6.50171e-05	5.76466e-05	5.45598e-05	6.42044e-05	5.50947e-05	5.65411e-05	5.47224e-05	5.95983e-05	5.16325e-05	5.00325e-05	5.95739e-05	5.52511e-05	5.84981e-05	6.39205e-05	5.85653e-05	4.79954e-05	5.3246e-05	4.49651e-05	4.74925e-05	4.793e-05	4.51168e-05
Neuron_121	0.000260521	0.000213169	0.00018164	0.000151625	0.000131892	0.000129287	0.000109514	0.000110902	9.0825e-05	8.34758e-05	9.73394e-05	8.88498e-05	7.48949e-05	7.94901e-05	8.66219e-05	8.74782e-05	8.16038e-05	7.90546e-05	7.88938e-05	7.55248e-05	6.62063e-05	7.02349e-05	6.74172e-05	6.58564e-05	8.51291e-05	6.74577e-05	7.78667e-05	6.3282e-05	6.8119e-05	6.13195e-05	5.90884e-05	6.73792e-05	5.98059e-05	5.94142e-05	6.47631e-05	6.48703e-05	5.21417e-05	4.99402e-05	5.97011e-05	5.357e-05	6.30161e-05	6.31961e-05	5.93803e-05	4.94541e-05	5.37548e-05	5.08117e-05	4.71195e-05	5.20749e-05	5.27801e-05
Neuron_122	0.000286745	0.000269406	0.000238311	0.000174952	0.000135139	0.000122685	0.000111688	9.78416e-05	8.34235e-05	7.70064e-05	7.7037e-05	6.91266e-05	6.98223e-05	7.6678e-05	7.98033e-05	7.19076e-05	6.26688e-05	5.08492e-05	5.78226e-05	6.20415e-05	5.8309e-05	5.65973e-05	5.74804e-05	4.90307e-05	5.85871e-05	5.47623e-05	5.46779e-05	4.0272e-05	5.13979e-05	4.848e-05	5.4273e-05	5.63561e-05	4.53428e-05	4.23159e-05	4.09814e-05	4.42171e-05	4.16932e-05	4.29533e-05	4.44869e-05	3.18009e-05	5.12688e-05	4.417e-05	4.17064e-05	3.82461e-05	4.03891e-05	3.70884e-05	3.28004e-05	3.93274e-05	3.68792e-05
Neuron_123	0.000183151	0.000182273	0.000161311	0.000119842	9.99642e-05	8.20371e-05	7.00595e-05	6.10037e-05	5.7167e-05	5.00798e-05	5.17408e-05	4.66546e-05	4.21029e-05	4.75485e-05	5.38152e-05	4.71236e-05	3.85186e-05	3.48833e-05	4.01612e-05	4.06485e-05	3.98324e-05	4.23241e-05	3.61984e-05	3.65207e-05	4.00771e-05	3.59206e-05	4.02573e-05	3.022e-05	3.02655e-05	3.41194e-05	3.50482e-05	3.94004e-05	3.66433e-05	2.99043e-05	2.94757e-05	3.10875e-05	3.16674e-05	2.8385e-05	3.03913e-05	2.68946e-05	3.32168e-05	2.75422e-05	2.80926e-05	2.74612e-05	2.72694e-05	2.50979e-05	2.00135e-05	2.85618e-05	2.44655e-05
Neuron_124	0.000232461	0.000211687	0.000197023	0.000165165	0.000159801	0.0001429	0.000129064	0.000121634	0.000105894	0.000107852	0.000107213	9.50311e-05	8.93502e-05	9.44214e-05	9.1904e-05	9.80278e-05	9.14494e-05	8.67876e-05	8.38112e-05	8.79842e-05	8.03427e-05	8.67772e-05	7.35998e-05	7.52957e-05	8.87479e-05	8.24353e-05	8.93966e-05	6.5363e-05	7.77687e-05	7.49621e-05	6.87449e-05	8.37686e-05	7.821e-05	7.18231e-05	7.30463e-05	7.19962e-05	6.64317e-05	6.17773e-05	6.38358e-05	6.61649e-05	7.21414e-05	8.05274e-05	7.73695e-05	5.78665e-05	5.88219e-05	5.96123e-05	5.84487e-05	5.81133e-05	5.57741e-05
Neuron_125	0.000152358	0.000145692	0.000127546	9.27258e-05	7.53025e-05	6.66752e-05	4.95923e-05	5.22606e-05	4.71779e-05	4.15357e-05	4.73683e-05	4.06567e-05	3.46549e-05	3.9695e-05	4.37404e-05	3.77461e-05	3.57203e-05	3.57782e-05	3.57441e-05	3.45312e-05	3.27206e-05	3.58976e-05	2.84204e-05	2.99015e-05	3.43374e-05	2.94566e-05	3.40457e-05	2.78798e-05	2.94784e-05	2.90859e-05	2.72752e-05	3.17688e-05	2.97091e-05	2.61848e-05	2.4777e-05	2.8233e-05	2.59865e-05	2.43907e-05	3.00272e-05	2.59093e-05	2.77216e-05	2.67254e-05	2.65888e-05	2.33244e-05	2.57989e-05	2.01262e-05	2.07553e-05	2.20452e-05	2.07013e-05
Neuron_126	0.000242985	0.000184514	0.000167029	0.000112935	9.73123e-05	8.4016e-05	7.85889e-05	7.09148e-05	5.67269e-05	6.12954e-05	5.25968e-05	5.21994e-05	4.35547e-05	5.48271e-05	5.05837e-05	4.8196e-05	4.62513e-05	4.46511e-05	4.61791e-05	4.69307e-05	4.84158e-05	5.21712e-05	3.74219e-05	3.82492e-05	4.73092e-05	3.71167e-05	4.49659e-05	3.66126e-05	3.64089e-05	3.88809e-05	3.65649e-05	3.94468e-05	3.67687e-05	2.94791e-05	2.84073e-05	3.81632e-05	3.67492e-05	3.50949e-05	3.97966e-05	3.0923e-05	3.69842e-05	3.01858e-05	3.53935e-05	3.89944e-05	3.85783e-05	2.53047e-05	2.73025e-05	3.29877e-05	2.62259e-05
Neuron_127	0.000295873	0.000283848	0.000224777	0.00017838	0.000153652	0.000150394	0.000121927	0.000125224	0.000103572	9.51888e-05	0.00010832	9.61754e-05	8.17409e-05	8.70689e-05	9.98113e-05	9.97763e-05	9.04409e-05	8.76303e-05	8.51385e-05	8.39695e-05	7.31226e-05	7.79307e-05	7.48651e-05	7.25552e-05	9.39339e-05	7.05462e-05	8.33089e-05	7.04558e-05	7.43897e-05	6.59404e-05	6.54049e-05	7.56898e-05	6.72216e-05	6.6475e-05	7.0483e-05	7.12023e-05	5.83983e-05	5.49524e-05	6.63707e-05	6.09688e-05	6.74639e-05	6.94719e-05	6.50027e-05	5.43245e-05	5.90203e-05	5.56955e-05	5.14386e-05	5.73729e-05	5.83545e-05
Neuron_128	0.000209164	0.000177272	0.000158465	0.00010537	8.19923e-05	7.12527e-05	6.3254e-05	5.48346e-05	4.50336e-05	4.77823e-05	4.38807e-05	4.02547e-05	3.58959e-05	4.04283e-05	4.05156e-05	3.98305e-05	3.26693e-05	3.17907e-05	3.35391e-05	3.59598e-05	3.58194e-05	3.5098e-05	2.66552e-05	2.85983e-05	3.24255e-05	2.82352e-05	3.10712e-05	2.69817e-05	2.57107e-05	2.58294e-05	2.64187e-05	2.88552e-05	2.45888e-05	2.29721e-05	2.15064e-05	2.32035e-05	2.42334e-05	2.4844e-05	2.53935e-05	2.15328e-05	2.57421e-05	2.22854e-05	2.14322e-05	2.30425e-05	2.39647e-05	1.83826e-05	1.83161e-05	1.95969e-05	1.74426e-05
Neuron_129	0.000153556	0.000149927	0.000125282	0.000102284	8.80161e-05	7.87831e-05	6.10921e-05	5.9031e-05	5.12903e-05	4.71073e-05	5.32296e-05	4.4175e-05	4.12869e-05	4.24516e-05	4.69333e-05	4.55359e-05	3.90804e-05	3.77305e-05	3.88372e-05	3.96282e-05	3.5773e-05	3.80729e-05	3.29458e-05	3.31031e-05	3.81184e-05	3.47124e-05	3.77734e-05	3.10846e-05	3.13672e-05	3.28922e-05	3.05746e-05	3.73138e-05	3.37661e-05	3.14143e-05	3.13201e-05	3.20414e-05	3.02559e-05	2.82767e-05	2.87764e-05	2.73809e-05	3.07209e-05	2.98975e-05	2.93894e-05	2.37917e-05	2.56896e-05	2.52807e-05	2.31978e-05	2.48228e-05	2.34479e-05
Neuron_130	0.000121012	0.0001199	0.000103206	6.77878e-05	5.36137e-05	4.70027e-05	3.90608e-05	3.84931e-05	3.08694e-05	3.0984e-05	3.17053e-05	2.71941e-05	2.38043e-05	2.71254e-05	2.95572e-05	2.68287e-05	2.30482e-05	2.28741e-05	2.32478e-05	2.50567e-05	2.37124e-05	2.44179e-05	2.0054e-05	1.96829e-05	2.35686e-05	1.88991e-05	2.12468e-05	1.89905e-05	1.84054e-05	1.8364e-05	1.76861e-05	1.96713e-05	1.73598e-05	1.61524e-05	1.43064e-05	1.78475e-05	1.66132e-05	1.67952e-05	1.97317e-05	1.62461e-05	1.79403e-05	1.59098e-05	1.56943e-05	1.64714e-05	1.73931e-05	1.2416e-05	1.2965e-05	1.42831e-05	1.37827e-05
Neuron_131	0.000254671	0.000233052	0.000214091	0.00016728	0.000164931	0.000154726	0.000129697	0.000130169	0.000109205	0.000114526	0.00011918	0.000106431	9.38222e-05	0.000105601	0.000104299	0.000104814	0.000106531	0.00010313	9.54084e-05	9.51265e-05	8.90358e-05	9.7357e-05	7.607e-05	8.51644e-05	0.000100916	8.84955e-05	9.49747e-05	7.81666e-05	9.22661e-05	8.12069e-05	7.05414e-05	9.36151e-05	8.19516e-05	7.36587e-05	7.75508e-05	8.53004e-05	7.3601e-05	7.03671e-05	8.00204e-05	7.46356e-05	7.75686e-05	8.61532e-05	8.41444e-05	6.81005e-05	7.54958e-05	6.04884e-05	6.67366e-05	6.17598e-05	5.98011e-05
Neuron_132	0.00032502	0.000317192	0.00027187	0.000196981	0.000179126	0.000169446	0.000139095	0.000138962	0.000113126	0.00011767	0.000120525	0.000112294	9.51944e-05	0.000109339	0.000116533	0.00011134	0.000110018	0.000102577	9.88129e-05	9.9454e-05	9.42448e-05	0.000100946	8.49245e-05	8.91413e-05	0.000104588	8.50709e-05	8.96052e-05	8.0093e-05	9.00419e-05	7.89323e-05	7.46885e-05	8.92456e-05	7.39391e-05	7.35367e-05	7.36672e-05	8.52628e-05	6.78622e-05	6.94751e-05	8.5021e-05	7.26436e-05	7.87793e-05	8.14565e-05	7.64929e-05	7.29402e-05	7.65753e-05	6.05403e-05	6.32924e-05	6.40812e-05	6.28052e-05
Neuron_133	0.000302553	0.000274624	0.000260255	0.000194727	0.000155592	0.000138292	0.000130207	0.000115899	9.43487e-05	8.89109e-05	8.89454e-05	8.36002e-05	7.73571e-05	8.36376e-05	7.91167e-05	7.89445e-05	7.19094e-05	7.00065e-05	7.12331e-05	6.95623e-05	6.65061e-05	6.48558e-05	6.27735e-05	5.53762e-05	7.8565e-05	6.6816e-05	6.94793e-05	5.44396e-05	6.00391e-05	5.74776e-05	5.42954e-05	6.14096e-05	5.39689e-05	4.55795e-05	5.31802e-05	5.79395e-05	5.03479e-05	4.66136e-05	5.89269e-05	4.00084e-05	6.01424e-05	5.39176e-05	5.2749e-05	4.80993e-05	5.14778e-05	4.01236e-05	4.09686e-05	4.59695e-05	4.64256e-05
Neuron_134	0.000280933	0.000256358	0.000232519	0.000181849	0.000158606	0.000144897	0.000126849	0.000114041	9.83211e-05	0.000106237	0.000105226	9.12701e-05	8.68509e-05	9.41611e-05	0.000101668	9.26979e-05	8.68801e-05	7.36506e-05	7.83972e-05	8.33833e-05	8.02373e-05	7.64288e-05	6.99814e-05	6.94442e-05	7.8265e-05	6.95892e-05	7.73289e-05	5.76956e-05	6.8159e-05	6.37657e-05	7.27348e-05	7.33809e-05	6.52504e-05	6.59902e-05	5.54234e-05	6.67335e-05	5.87393e-05	6.37616e-05	6.07757e-05	5.42534e-05	6.75536e-05	6.88432e-05	6.34878e-05	5.32549e-05	5.26544e-05	5.4171e-05	4.97574e-05	5.54471e-05	5.03194e-05
Neuron_135	0.000243107	0.000238191	0.000229199	0.000160092	0.000126242	0.000107973	9.35449e-05	8.9557e-05	7.70724e-05	7.03598e-05	7.92949e-05	7.38516e-05	6.40692e-05	7.38814e-05	8.5558e-05	6.26112e-05	6.51515e-05	5.999e-05	6.36664e-05	5.98614e-05	5.91348e-05	6.0915e-05	5.27297e-05	5.10066e-05	5.48692e-05	5.05594e-05	5.55133e-05	5.38186e-05	5.46682e-05	5.0313e-05	5.13909e-05	5.24533e-05	5.22352e-05	4.53879e-05	4.16829e-05	5.11993e-05	4.87409e-05	4.45133e-05	5.5532e-05	4.02004e-05	5.41548e-05	4.12634e-05	4.33793e-05	4.26624e-05	4.88239e-05	3.86618e-05	3.50891e-05	3.80833e-05	3.65803e-05
Neuron_136	0.000231901	0.000223434	0.000192117	0.000162261	0.000146115	0.000142314	0.000115068	0.000113011	9.62339e-05	0.000100548	0.000102251	8.80662e-05	7.88694e-05	8.25204e-05	8.69827e-05	9.5551e-05	8.63683e-05	8.20777e-05	7.71048e-05	7.95108e-05	7.43449e-05	7.18076e-05	6.51735e-05	7.1209e-05	8.77225e-05	7.2761e-05	8.26744e-05	6.30142e-05	7.17391e-05	6.5092e-05	6.13942e-05	7.80931e-05	6.50389e-05	6.52577e-05	6.62845e-05	6.5456e-05	5.76115e-05	5.51387e-05	5.9576e-05	6.07904e-05	6.48156e-05	7.50878e-05	6.70037e-05	4.99488e-05	5.30825e-05	5.28991e-05	5.34236e-05	5.10056e-05	5.30648e-05
Neuron_137	0.000318395	0.000282106	0.000244776	0.000190687	0.000167537	0.000162236	0.000137199	0.000130467	0.000113032	0.000124982	0.000123085	0.00010815	0.000101789	0.000108002	0.000111776	0.000102972	0.00010164	9.1238e-05	9.27222e-05	0.000100905	9.335e-05	9.07811e-05	8.25591e-05	8.45439e-05	8.68045e-05	8.52222e-05	9.1982e-05	7.17461e-05	8.54138e-05	8.04093e-05	8.49578e-05	9.00979e-05	8.15052e-05	8.14114e-05	7.03338e-05	8.01028e-05	6.96677e-05	7.14151e-05	7.08911e-05	7.35364e-05	8.40377e-05	8.84466e-05	8.21167e-05	6.31664e-05	6.10831e-05	6.80126e-05	6.30474e-05	6.11382e-05	6.15792e-05
Neuron_138	0.000224458	0.000187297	0.000167369	0.000119378	9.11391e-05	8.27353e-05	7.29741e-05	6.40531e-05	5.51683e-05	5.84132e-05	5.0897e-05	4.71238e-05	4.01664e-05	5.06685e-05	5.19329e-05	4.38442e-05	4.19734e-05	3.59329e-05	4.02213e-05	4.05489e-05	4.0057e-05	4.13364e-05	3.63586e-05	3.44918e-05	3.95131e-05	3.07296e-05	3.59486e-05	3.03151e-05	3.18418e-05	3.09197e-05	3.67944e-05	3.53465e-05	3.14077e-05	2.84961e-05	2.35025e-05	2.86205e-05	2.91959e-05	2.80057e-05	3.13597e-05	2.40166e-05	3.41134e-05	2.90711e-05	2.89125e-05	2.87623e-05	2.74608e-05	2.32191e-05	2.2292e-05	2.70277e-05	2.39616e-05
Neuron_139	0.000132156	0.000134924	0.000123053	7.92419e-05	6.7615e-05	5.886e-05	5.54141e-05	5.13158e-05	4.26005e-05	4.33901e-05	4.0807e-05	4.06146e-05	3.42156e-05	4.04158e-05	3.8654e-05	3.50233e-05	3.5677e-05	3.44441e-05	3.54269e-05	3.37342e-05	3.44696e-05	3.79796e-05	2.73372e-05	2.8474e-05	3.50159e-05	2.96107e-05	3.30454e-05	2.75966e-05	2.91922e-05	2.97635e-05	2.7616e-05	3.084e-05	2.77625e-05	2.16308e-05	2.27783e-05	2.88279e-05	2.70292e-05	2.5404e-05	3.01658e-05	2.34522e-05	2.84206e-05	2.60713e-05	2.73537e-05	2.79562e-05	2.78352e-05	1.83157e-05	2.08735e-05	2.33495e-05	1.97222e-05
Neuron_140	0.000125806	0.000150345	0.000115857	9.39184e-05	7.3413e-05	6.34855e-05	5.10524e-05	4.96287e-05	4.1736e-05	3.81187e-05	3.62526e-05	3.27774e-05	3.32489e-05	3.44335e-05	4.13075e-05	3.81745e-05	2.94008e-05	2.35054e-05	2.65205e-05	2.87028e-05	2.801e-05	2.55037e-05	2.58602e-05	2.42889e-05	2.64757e-05	2.69613e-05	2.49799e-05	1.94148e-05	2.33575e-05	2.357e-05	2.53579e-05	2.96393e-05	2.26758e-05	1.9499e-05	1.84587e-05	2.26085e-05	2.00785e-05	2.09578e-05	2.24589e-05	1.67101e-05	2.31329e-05	2.07376e-05	1.88799e-05	1.67782e-05	1.85027e-05	1.64049e-05	1.57724e-05	1.9643e-05	1.76039e-05
Neuron_141	0.000270942	0.000223211	0.000213817	0.000164904	0.000134504	0.000134916	0.000115007	0.000115849	9.52557e-05	8.80335e-05	0.000103597	9.21162e-05	7.24285e-05	7.61338e-05	7.64919e-05	8.90099e-05	8.17306e-05	8.66977e-05	8.22912e-05	7.5232e-05	6.67107e-05	6.8757e-05	6.41439e-05	6.52706e-05	9.64816e-05	7.51739e-05	8.54508e-05	6.94806e-05	6.99353e-05	6.2926e-05	5.60817e-05	7.13618e-05	6.14657e-05	5.83942e-05	6.96882e-05	6.90891e-05	5.56964e-05	4.76033e-05	6.45209e-05	5.41168e-05	6.70102e-05	7.14341e-05	6.65175e-05	5.26138e-05	5.61879e-05	4.82316e-05	4.94039e-05	5.43587e-05	5.66206e-05
Neuron_142	0.000221209	0.000199731	0.00018695	0.000148585	0.000133393	0.00011502	9.69586e-05	9.04333e-05	7.92311e-05	7.30626e-05	8.43372e-05	7.24781e-05	7.03131e-05	7.43701e-05	8.73205e-05	7.1853e-05	6.86249e-05	5.82915e-05	6.35152e-05	6.73039e-05	5.92644e-05	6.46679e-05	5.84381e-05	5.54366e-05	5.93397e-05	5.58383e-05	6.18558e-05	5.12288e-05	5.51497e-05	5.31955e-05	5.64054e-05	5.99029e-05	5.97771e-05	5.53521e-05	5.19795e-05	5.21577e-05	5.31261e-05	4.98514e-05	4.81085e-05	4.53173e-05	5.4627e-05	4.46419e-05	4.74977e-05	4.10018e-05	4.49194e-05	4.80341e-05	3.67327e-05	4.26531e-05	4.06846e-05
Neuron_143	0.000218133	0.000215045	0.000198978	0.000136831	0.00012541	0.000106304	9.65593e-05	9.09846e-05	7.46105e-05	7.50953e-05	7.75951e-05	6.59734e-05	6.35461e-05	6.70505e-05	7.33652e-05	6.91671e-05	6.20725e-05	5.37456e-05	5.71285e-05	6.44051e-05	5.57875e-05	5.86318e-05	5.44182e-05	5.22814e-05	5.52583e-05	5.28487e-05	5.71881e-05	4.76566e-05	5.05143e-05	5.02349e-05	4.83528e-05	5.4186e-05	5.31121e-05	4.84785e-05	4.72609e-05	4.83711e-05	4.72365e-05	4.39893e-05	4.55085e-05	4.22231e-05	4.91222e-05	4.44082e-05	4.43362e-05	3.87712e-05	4.07717e-05	4.06786e-05	3.42959e-05	3.80603e-05	3.65386e-05
Neuron_144	0.000210388	0.000162038	0.000143393	0.000121785	9.92716e-05	9.48832e-05	8.15546e-05	7.78688e-05	6.8769e-05	6.2674e-05	6.78228e-05	6.55407e-05	5.75147e-05	6.48893e-05	7.29072e-05	6.12237e-05	5.96894e-05	5.18633e-05	5.71162e-05	5.49151e-05	4.86499e-05	5.0918e-05	5.10919e-05	4.74757e-05	5.51219e-05	4.68356e-05	4.9818e-05	4.22167e-05	4.88322e-05	4.36888e-05	4.67628e-05	4.88819e-05	4.2655e-05	4.35752e-05	4.25033e-05	4.35784e-05	3.76904e-05	3.85514e-05	4.18209e-05	3.65018e-05	4.52499e-05	4.3676e-05	4.07675e-05	3.37018e-05	3.73949e-05	3.76287e-05	3.19526e-05	3.73925e-05	3.53601e-05
Neuron_145	0.000366142	0.000347504	0.000313201	0.000235611	0.000197134	0.000182588	0.000159474	0.000153686	0.000129841	0.000129492	0.000132595	0.000112381	0.000100359	0.000103394	9.89865e-05	0.000116098	0.000100367	0.000102617	9.88787e-05	0.00010224	8.94427e-05	9.20718e-05	8.04275e-05	8.29843e-05	0.000107831	9.25437e-05	0.000105435	7.73276e-05	8.49843e-05	8.31664e-05	7.32297e-05	9.01805e-05	8.17371e-05	7.67151e-05	8.06525e-05	7.90357e-05	7.28162e-05	6.71004e-05	7.23463e-05	7.15349e-05	7.9141e-05	9.00482e-05	8.23952e-05	6.16519e-05	6.50136e-05	6.1165e-05	6.35257e-05	6.53048e-05	6.02551e-05
Neuron_146	0.0001795	0.000162181	0.000147516	0.00011801	9.73124e-05	9.15619e-05	7.8078e-05	7.51034e-05	6.56498e-05	6.14171e-05	6.64889e-05	6.29432e-05	5.22838e-05	5.99763e-05	6.76191e-05	5.98081e-05	5.71936e-05	5.30741e-05	5.50323e-05	5.28683e-05	4.69297e-05	4.91741e-05	4.78326e-05	4.67356e-05	5.64352e-05	4.68122e-05	5.11683e-05	4.37397e-05	4.78776e-05	4.24121e-05	4.27297e-05	4.70843e-05	4.12216e-05	3.95529e-05	4.14744e-05	4.42635e-05	3.6669e-05	3.71597e-05	4.28931e-05	3.62167e-05	4.31716e-05	4.35367e-05	4.13069e-05	3.41593e-05	3.84823e-05	3.39018e-05	3.18942e-05	3.83663e-05	3.42918e-05
Neuron_147	0.000194928	0.00017758	0.000163372	0.000122115	0.000108903	9.9834e-05	8.80317e-05	8.58669e-05	7.35286e-05	7.12389e-05	7.69532e-05	6.75499e-05	5.99293e-05	6.5452e-05	6.82978e-05	6.60717e-05	6.42638e-05	5.97636e-05	5.99493e-05	6.19009e-05	5.57138e-05	5.84408e-05	5.11778e-05	5.2056e-05	5.86038e-05	5.50845e-05	6.09218e-05	4.97585e-05	5.44715e-05	5.07223e-05	4.70918e-05	5.48156e-05	5.16126e-05	4.70194e-05	4.91868e-05	5.11662e-05	4.64526e-05	4.12632e-05	5.01424e-05	4.21805e-05	5.19519e-05	5.26392e-05	4.8431e-05	4.10459e-05	4.31002e-05	3.85698e-05	3.75534e-05	3.91357e-05	3.85994e-05
Neuron_148	0.000182683	0.000163986	0.000143546	0.000110961	9.67635e-05	8.41803e-05	7.07896e-05	6.39597e-05	5.57768e-05	5.27098e-05	5.75946e-05	4.92417e-05	4.99325e-05	5.13473e-05	5.75097e-05	5.12448e-05	4.68142e-05	3.97411e-05	4.29186e-05	4.7401e-05	4.08952e-05	4.42208e-05	4.06724e-05	3.87985e-05	4.24819e-05	4.11519e-05	4.29363e-05	3.46825e-05	3.80074e-05	3.67689e-05	3.76657e-05	4.15979e-05	4.09039e-05	3.85895e-05	3.74983e-05	3.51022e-05	3.64139e-05	3.39147e-05	3.21464e-05	3.22976e-05	3.76215e-05	3.16165e-05	3.3444e-05	2.81661e-05	2.99504e-05	3.32321e-05	2.57991e-05	2.8159e-05	2.73568e-05
Neuron_149	0.000219993	0.000205197	0.000202255	0.000155063	0.000123402	0.00010832	9.10016e-05	9.27762e-05	8.09098e-05	6.7622e-05	8.67488e-05	7.34309e-05	6.34591e-05	6.6702e-05	8.16567e-05	7.12489e-05	6.60388e-05	6.37604e-05	6.5518e-05	6.66105e-05	5.35553e-05	5.72558e-05	5.95205e-05	5.57263e-05	6.64578e-05	5.7728e-05	6.75829e-05	5.57686e-05	5.53706e-05	5.12437e-05	4.96929e-05	5.6049e-05	5.72996e-05	5.23357e-05	5.62016e-05	5.19999e-05	4.87802e-05	4.0237e-05	4.86427e-05	4.58823e-05	5.42518e-05	4.90043e-05	4.9241e-05	3.8012e-05	4.25146e-05	4.50475e-05	3.41753e-05	4.37761e-05	4.34466e-05
Neuron_150	0.000163789	0.000147073	0.000139948	0.000106284	9.38257e-05	7.89632e-05	6.65509e-05	6.34781e-05	5.58678e-05	5.10215e-05	5.82901e-05	5.09214e-05	4.86033e-05	5.03647e-05	5.97871e-05	4.7789e-05	4.51428e-05	3.96491e-05	4.33362e-05	4.50829e-05	4.04128e-05	4.34451e-05	3.84538e-05	3.71757e-05	3.94885e-05	3.80858e-05	4.08886e-05	3.58205e-05	3.64002e-05	3.60374e-05	3.69718e-05	3.8727e-05	3.93955e-05	3.67761e-05	3.39686e-05	3.33751e-05	3.44437e-05	3.18232e-05	3.27409e-05	3.09725e-05	3.65742e-05	2.97624e-05	3.15226e-05	2.68464e-05	2.95064e-05	3.0733e-05	2.41581e-05	2.60673e-05	2.58276e-05
Neuron_151	0.000156137	0.000138597	0.000134992	8.96162e-05	7.50445e-05	6.13589e-05	5.67814e-05	5.25238e-05	4.17812e-05	4.20442e-05	4.30019e-05	3.83511e-05	3.67654e-05	3.9881e-05	4.33551e-05	3.80225e-05	3.34323e-05	3.0096e-05	3.21162e-05	3.46273e-05	3.33063e-05	3.41477e-05	2.74563e-05	2.59379e-05	2.99167e-05	2.54268e-05	2.973e-05	2.68331e-05	2.64124e-05	2.63695e-05	2.84358e-05	2.76804e-05	2.69592e-05	2.49167e-05	2.07136e-05	2.56014e-05	2.64048e-05	2.74886e-05	2.63151e-05	2.12225e-05	2.61522e-05	2.00338e-05	2.17202e-05	2.24386e-05	2.50855e-05	2.10881e-05	1.84537e-05	2.07351e-05	1.87966e-05
Neuron_152	0.000370039	0.000348758	0.000311332	0.000222047	0.000177654	0.000161068	0.000139596	0.000135687	0.000112704	0.000107655	0.000113481	0.000104474	9.44053e-05	0.000104629	0.000117774	9.39112e-05	9.42527e-05	8.58423e-05	9.04115e-05	9.10629e-05	8.27239e-05	8.95049e-05	8.11783e-05	7.562e-05	8.68323e-05	7.24505e-05	8.72443e-05	7.7424e-05	7.70726e-05	7.4297e-05	7.51881e-05	7.61811e-05	7.83037e-05	6.76284e-05	6.78877e-05	7.04668e-05	6.88192e-05	5.98749e-05	7.48845e-05	6.01459e-05	7.77259e-05	6.21501e-05	6.72172e-05	6.16163e-05	6.49787e-05	5.75051e-05	5.05499e-05	5.51916e-05	5.56852e-05
Neuron_153	0.000169577	0.000160826	0.000138377	0.00010997	9.47255e-05	8.24978e-05	7.19044e-05	6.67062e-05	6.12689e-05	5.73083e-05	5.88102e-05	5.21757e-05	4.59826e-05	5.05031e-05	4.8369e-05	5.25257e-05	4.65711e-05	4.67465e-05	4.62528e-05	4.65328e-05	4.23911e-05	4.58559e-05	3.80916e-05	3.93976e-05	5.0018e-05	4.14388e-05	4.84827e-05	3.37225e-05	3.91461e-05	3.79223e-05	3.58162e-05	4.22726e-05	4.00354e-05	3.49139e-05	3.53652e-05	3.55864e-05	3.40608e-05	3.10544e-05	3.4915e-05	3.30813e-05	3.68816e-05	3.91866e-05	3.94218e-05	3.06762e-05	3.18721e-05	2.8105e-05	2.8747e-05	3.08228e-05	2.67696e-05
Neuron_154	0.000185542	0.000185643	0.000153043	0.000102831	7.91937e-05	7.04407e-05	5.83079e-05	5.86164e-05	4.56652e-05	4.34548e-05	4.33489e-05	3.87919e-05	3.57805e-05	3.92051e-05	4.53623e-05	4.11466e-05	3.27167e-05	3.0378e-05	3.24567e-05	3.41953e-05	3.39256e-05	3.23222e-05	3.03164e-05	2.80575e-05	3.30769e-05	2.91494e-05	3.16831e-05	2.69336e-05	2.62673e-05	3.00414e-05	2.71973e-05	3.22461e-05	2.67247e-05	2.27202e-05	2.36248e-05	2.70157e-05	2.50622e-05	2.37131e-05	2.72475e-05	2.08972e-05	2.63391e-05	2.28079e-05	2.11316e-05	2.18635e-05	2.35354e-05	1.87393e-05	1.82865e-05	2.10987e-05	2.15749e-05
Neuron_155	0.000181468	0.000163784	0.000148045	0.000101403	8.23235e-05	7.22105e-05	5.93433e-05	5.54864e-05	4.36718e-05	4.50829e-05	4.34544e-05	3.71244e-05	3.71661e-05	4.04385e-05	4.11079e-05	3.85539e-05	3.07333e-05	3.05452e-05	3.08845e-05	3.73213e-05	3.40521e-05	3.30232e-05	2.80148e-05	2.80486e-05	3.0402e-05	3.09228e-05	3.29134e-05	2.4636e-05	2.54115e-05	2.74692e-05	2.46884e-05	2.89194e-05	2.73014e-05	2.37802e-05	2.21209e-05	2.7128e-05	2.41842e-05	2.37607e-05	2.64391e-05	2.51644e-05	2.55994e-05	2.34223e-05	2.42856e-05	2.24431e-05	2.28372e-05	1.90098e-05	1.79541e-05	2.15195e-05	1.77595e-05
Neuron_156	0.00018142	0.000192383	0.00015531	0.000121542	9.59208e-05	8.9177e-05	7.32857e-05	6.85902e-05	6.04376e-05	5.48176e-05	5.68006e-05	5.05022e-05	4.81324e-05	5.30133e-05	5.94916e-05	5.5492e-05	4.7848e-05	4.17329e-05	4.40156e-05	4.69319e-05	4.19843e-05	4.18629e-05	4.25498e-05	4.03488e-05	4.61903e-05	4.04662e-05	4.17921e-05	3.42733e-05	3.87116e-05	3.45676e-05	3.65768e-05	4.11847e-05	3.52678e-05	3.45994e-05	3.49285e-05	3.40529e-05	3.08395e-05	3.09337e-05	3.45799e-05	3.04392e-05	3.69417e-05	3.45001e-05	3.21967e-05	2.70506e-05	3.06172e-05	2.92717e-05	2.6043e-05	2.87617e-05	2.79592e-05
Neuron_157	0.000342357	0.000293112	0.000278794	0.000212037	0.000192071	0.000161776	0.000138047	0.000132848	0.000116857	0.000108895	0.000122412	0.000107917	0.000102635	0.000109065	0.000129044	0.000104248	9.93568e-05	8.40894e-05	9.34433e-05	0.000100427	8.49281e-05	9.14912e-05	8.81443e-05	8.65326e-05	8.68198e-05	8.46382e-05	9.29969e-05	7.43805e-05	8.24115e-05	8.10373e-05	8.00018e-05	9.02112e-05	8.96638e-05	8.129e-05	7.66848e-05	7.76232e-05	7.59765e-05	6.72829e-05	7.25915e-05	7.26884e-05	7.72935e-05	6.82407e-05	7.2824e-05	5.98725e-05	6.26854e-05	6.8971e-05	5.20904e-05	6.20761e-05	5.90285e-05
Neuron_158	0.00017878	0.000197686	0.000162332	0.000113496	8.85982e-05	7.69013e-05	6.21729e-05	6.05906e-05	5.20132e-05	4.96817e-05	4.72409e-05	4.36807e-05	3.901e-05	4.43527e-05	5.00841e-05	4.29167e-05	3.6232e-05	3.24053e-05	3.63067e-05	3.67273e-05	3.61398e-05	3.54874e-05	3.22508e-05	3.19587e-05	3.41181e-05	3.08266e-05	3.32246e-05	2.79689e-05	2.87939e-05	2.92993e-05	3.23032e-05	3.39962e-05	2.91126e-05	2.46229e-05	2.37171e-05	2.59939e-05	2.58888e-05	2.31361e-05	2.80066e-05	2.35156e-05	3.13358e-05	2.92394e-05	2.64757e-05	2.4409e-05	2.28814e-05	1.99708e-05	1.97515e-05	2.34556e-05	2.2097e-05
Neuron_159	0.000274203	0.000249854	0.000234392	0.000182335	0.000174202	0.000156957	0.000141428	0.000140379	0.00011814	0.000119769	0.0001261	0.00011107	0.000102151	0.00010819	0.000111376	0.00010868	0.00010674	9.78219e-05	9.79333e-05	0.000103322	9.11376e-05	9.60132e-05	8.7023e-05	8.81698e-05	9.6151e-05	9.3535e-05	9.90609e-05	7.96646e-05	9.12504e-05	8.52457e-05	8.04079e-05	9.32906e-05	8.9333e-05	8.32465e-05	8.26624e-05	8.44441e-05	7.54478e-05	6.97779e-05	7.88205e-05	7.49087e-05	8.54736e-05	8.94718e-05	8.49409e-05	6.58146e-05	6.83687e-05	6.92926e-05	6.45581e-05	6.40343e-05	6.51357e-05
Neuron_160	0.000183291	0.00016624	0.000148111	0.000102948	8.74945e-05	7.33554e-05	6.6578e-05	6.25901e-05	5.05724e-05	4.95666e-05	5.0562e-05	4.43066e-05	4.277e-05	4.30234e-05	4.70021e-05	4.45622e-05	3.75456e-05	3.40827e-05	3.63665e-05	4.21509e-05	3.48545e-05	3.8281e-05	3.35044e-05	3.21564e-05	3.48981e-05	3.07374e-05	3.62725e-05	3.04017e-05	3.0246e-05	3.03465e-05	3.09909e-05	3.2317e-05	3.38038e-05	3.0905e-05	2.91977e-05	2.73612e-05	2.85778e-05	2.60319e-05	2.50582e-05	2.75113e-05	3.02205e-05	2.739e-05	2.85565e-05	2.41182e-05	2.26075e-05	2.57085e-05	2.0955e-05	2.21406e-05	2.13944e-05
Neuron_161	0.000152093	0.00011035	0.0001069	7.50575e-05	6.17677e-05	5.0827e-05	4.25195e-05	4.27998e-05	3.06084e-05	2.93444e-05	3.1874e-05	2.82292e-05	2.46799e-05	2.47953e-05	2.5828e-05	2.83949e-05	2.21006e-05	2.3183e-05	2.33507e-05	2.36786e-05	2.26147e-05	2.33878e-05	1.76519e-05	1.84239e-05	2.42564e-05	2.04963e-05	2.27617e-05	1.96704e-05	1.74312e-05	1.90923e-05	1.59312e-05	1.94793e-05	1.68517e-05	1.54e-05	1.5911e-05	1.95784e-05	1.67559e-05	1.77973e-05	1.87061e-05	1.58852e-05	1.57329e-05	1.41518e-05	1.54051e-05	1.5773e-05	1.723e-05	1.27644e-05	1.30714e-05	1.60635e-05	1.34744e-05
Neuron_162	0.000226555	0.000224317	0.000173796	0.000122527	0.0001031	8.67401e-05	7.40637e-05	7.19701e-05	6.37566e-05	5.98495e-05	6.01744e-05	5.20627e-05	5.10907e-05	5.22974e-05	5.62448e-05	5.42411e-05	4.79254e-05	4.35333e-05	4.53053e-05	5.29068e-05	4.37659e-05	4.90765e-05	4.46162e-05	4.19482e-05	4.48666e-05	4.07499e-05	4.87908e-05	3.47013e-05	3.86589e-05	4.10368e-05	3.95146e-05	4.30602e-05	4.33121e-05	3.80523e-05	3.66524e-05	4.01414e-05	3.58228e-05	3.3468e-05	3.57362e-05	3.59467e-05	3.84597e-05	3.64678e-05	3.8145e-05	3.19166e-05	3.20288e-05	3.25827e-05	2.76101e-05	3.21794e-05	2.8808e-05
Neuron_163	0.000244346	0.000248457	0.000228886	0.000154908	0.000116365	0.000102478	9.2176e-05	8.49678e-05	7.03723e-05	6.76709e-05	6.81054e-05	6.05777e-05	5.15659e-05	5.79597e-05	6.76403e-05	6.21081e-05	5.30109e-05	4.73651e-05	5.14214e-05	5.41157e-05	4.99948e-05	5.09507e-05	4.63251e-05	4.22729e-05	5.23916e-05	4.18686e-05	4.96189e-05	4.04753e-05	4.25531e-05	4.01316e-05	4.23539e-05	4.58092e-05	4.0026e-05	3.58238e-05	3.40916e-05	3.92434e-05	3.82458e-05	3.53423e-05	4.20757e-05	3.01466e-05	4.23767e-05	3.79394e-05	3.46882e-05	3.55651e-05	3.74128e-05	2.98772e-05	2.73793e-05	3.58212e-05	3.073e-05
Neuron_164	0.00015906	0.000147196	0.000134269	0.000101958	9.21352e-05	8.05582e-05	7.39406e-05	6.91521e-05	5.97122e-05	5.8051e-05	5.90936e-05	5.33788e-05	4.9599e-05	5.50295e-05	5.39449e-05	5.22947e-05	5.01761e-05	4.55706e-05	4.72702e-05	4.91405e-05	4.48934e-05	4.73733e-05	4.19257e-05	4.08587e-05	4.77099e-05	4.45744e-05	4.81715e-05	3.74156e-05	4.23629e-05	4.07612e-05	3.79455e-05	4.38235e-05	4.14136e-05	3.61507e-05	3.74248e-05	3.97998e-05	3.65223e-05	3.2718e-05	3.91382e-05	3.27003e-05	4.09931e-05	4.035e-05	3.89565e-05	3.29431e-05	3.34678e-05	3.02979e-05	2.90303e-05	3.16146e-05	3.07993e-05
Neuron_165	0.00022546	0.000197689	0.000182413	0.000134421	0.000108831	9.66409e-05	8.50493e-05	8.65309e-05	7.25351e-05	6.38395e-05	7.61761e-05	6.92479e-05	5.98776e-05	6.26719e-05	7.48893e-05	6.28939e-05	5.94042e-05	5.69409e-05	6.04503e-05	5.93791e-05	4.99306e-05	5.30303e-05	5.33562e-05	4.94995e-05	5.91247e-05	5.15729e-05	5.67596e-05	5.11375e-05	4.95675e-05	4.78284e-05	4.53422e-05	5.09435e-05	4.98562e-05	4.60736e-05	5.0529e-05	4.72385e-05	4.39373e-05	3.65047e-05	4.65726e-05	3.95675e-05	5.1239e-05	4.51843e-05	4.40492e-05	3.63651e-05	3.95101e-05	3.96611e-05	3.2143e-05	3.63715e-05	3.88305e-05
Neuron_166	0.00018201	0.000143696	0.000129935	0.00010988	9.89348e-05	8.57286e-05	6.53403e-05	6.61757e-05	5.57293e-05	5.3556e-05	6.1243e-05	5.37637e-05	4.66176e-05	5.05738e-05	5.25223e-05	5.03901e-05	5.00266e-05	4.855e-05	4.77923e-05	4.45613e-05	4.19283e-05	4.65196e-05	3.73664e-05	4.0313e-05	4.83507e-05	4.06136e-05	4.64598e-05	3.78436e-05	4.19427e-05	4.04445e-05	3.55256e-05	4.56322e-05	3.98695e-05	3.58647e-05	3.65802e-05	4.20748e-05	3.51888e-05	3.39187e-05	3.80282e-05	3.46155e-05	3.68011e-05	3.91564e-05	3.90571e-05	3.20542e-05	3.54988e-05	2.97331e-05	3.09423e-05	3.10914e-05	3.00094e-05
Neuron_167	0.000267234	0.000278684	0.000238919	0.000169832	0.000134652	0.000121265	0.000108418	9.96947e-05	8.7512e-05	7.82298e-05	8.35495e-05	7.59205e-05	6.91147e-05	8.14297e-05	9.0719e-05	7.42459e-05	7.00028e-05	5.85616e-05	6.63227e-05	6.7402e-05	6.39477e-05	6.48266e-05	6.13485e-05	5.50982e-05	6.08172e-05	5.78839e-05	5.86767e-05	5.04236e-05	5.74245e-05	5.22879e-05	5.48445e-05	5.96738e-05	4.96773e-05	4.5439e-05	4.41938e-05	4.99214e-05	4.72762e-05	4.46142e-05	5.56234e-05	3.74871e-05	5.77823e-05	4.81712e-05	4.37184e-05	4.46921e-05	4.85142e-05	3.85096e-05	3.6229e-05	4.12034e-05	3.92013e-05
Neuron_168	0.00018369	0.00017091	0.000161641	0.00013227	0.000109177	9.47453e-05	7.8578e-05	7.6278e-05	7.08169e-05	5.94467e-05	7.24374e-05	6.49083e-05	5.93203e-05	6.26388e-05	8.02395e-05	6.21752e-05	5.87235e-05	4.96635e-05	5.6772e-05	5.9781e-05	4.78264e-05	5.03672e-05	5.29051e-05	4.85857e-05	5.0229e-05	4.85026e-05	5.35221e-05	4.54965e-05	4.80756e-05	4.41928e-05	4.84431e-05	5.034e-05	4.99711e-05	4.7795e-05	4.52896e-05	4.35128e-05	4.28156e-05	3.94422e-05	4.05577e-05	3.77445e-05	4.78888e-05	4.00007e-05	3.97669e-05	3.13343e-05	3.61823e-05	4.20536e-05	2.84993e-05	3.6395e-05	3.49166e-05
Neuron_169	0.000225365	0.000213297	0.000188988	0.000151427	0.000137221	0.000117279	0.000102945	9.36716e-05	8.49568e-05	7.65918e-05	8.46423e-05	7.45913e-05	7.45299e-05	7.87062e-05	8.82034e-05	7.5528e-05	7.18768e-05	5.74565e-05	6.57785e-05	6.89543e-05	5.99864e-05	6.44772e-05	6.40929e-05	5.97244e-05	6.41158e-05	6.12568e-05	6.28237e-05	4.93709e-05	5.7578e-05	5.66636e-05	5.82012e-05	6.27747e-05	6.04251e-05	5.57835e-05	5.49297e-05	5.28826e-05	5.22117e-05	4.82833e-05	4.90657e-05	4.48649e-05	5.69614e-05	4.79536e-05	4.97088e-05	4.08394e-05	4.43599e-05	4.83291e-05	3.78361e-05	4.30232e-05	4.11755e-05
Neuron_170	0.000234446	0.000198921	0.000177614	0.000145077	0.000123401	0.000117978	9.67684e-05	9.12272e-05	8.02189e-05	8.01794e-05	8.25441e-05	7.18657e-05	6.40959e-05	7.39416e-05	8.46121e-05	7.30624e-05	6.97035e-05	5.91319e-05	6.25581e-05	6.34969e-05	5.95126e-05	5.99785e-05	5.71404e-05	5.56772e-05	6.23128e-05	5.27554e-05	5.34905e-05	4.9041e-05	5.56514e-05	4.65185e-05	5.49582e-05	5.59883e-05	4.58096e-05	5.14885e-05	4.46402e-05	4.75001e-05	4.23647e-05	4.51392e-05	4.72523e-05	4.1251e-05	5.18174e-05	5.27882e-05	4.50808e-05	4.06249e-05	4.05256e-05	4.17478e-05	3.78088e-05	4.14028e-05	4.04674e-05
Neuron_171	0.000178712	0.00018287	0.000161786	0.000117441	8.91473e-05	8.36181e-05	7.39164e-05	6.76593e-05	6.12145e-05	5.45755e-05	6.00492e-05	5.43795e-05	4.65113e-05	5.56464e-05	6.30409e-05	5.17308e-05	4.80154e-05	4.19592e-05	4.78411e-05	4.63464e-05	4.34548e-05	4.4614e-05	4.14451e-05	3.80524e-05	4.48447e-05	3.91509e-05	4.21413e-05	3.64713e-05	3.9462e-05	3.54584e-05	3.87391e-05	4.10718e-05	3.45746e-05	3.29522e-05	3.17592e-05	3.35276e-05	3.28099e-05	3.04187e-05	3.8505e-05	2.5839e-05	4.11096e-05	3.59667e-05	3.15137e-05	3.08594e-05	3.28998e-05	2.72383e-05	2.52182e-05	2.97516e-05	2.76239e-05
Neuron_172	0.000275642	0.000254933	0.000252127	0.000189837	0.000147958	0.000145676	0.000126693	0.000116537	0.000101141	0.000102218	0.000107898	9.61788e-05	8.42596e-05	9.45052e-05	0.000105138	9.19727e-05	8.57272e-05	7.67671e-05	8.35516e-05	8.45709e-05	7.84003e-05	7.29598e-05	7.07035e-05	6.84446e-05	8.19188e-05	6.79455e-05	7.63154e-05	6.52008e-05	6.98058e-05	6.10196e-05	7.49495e-05	7.04805e-05	6.24289e-05	6.46941e-05	5.71648e-05	6.50837e-05	5.77618e-05	6.00101e-05	6.39193e-05	5.10135e-05	7.15838e-05	6.90115e-05	6.10529e-05	5.2783e-05	5.34938e-05	5.39619e-05	4.89764e-05	5.59226e-05	5.35236e-05
Neuron_173	0.000125591	0.000132536	0.000119085	9.89575e-05	8.51349e-05	8.36226e-05	6.77175e-05	6.75724e-05	5.73154e-05	5.70544e-05	6.24546e-05	5.30933e-05	4.59665e-05	4.79902e-05	5.1781e-05	5.39742e-05	5.14761e-05	4.91822e-05	4.70915e-05	4.63731e-05	4.13459e-05	4.13481e-05	3.88339e-05	4.09559e-05	5.39804e-05	4.33286e-05	4.84309e-05	3.82759e-05	4.29469e-05	3.65665e-05	3.62156e-05	4.36442e-05	3.71566e-05	3.85362e-05	3.94301e-05	3.91491e-05	3.29233e-05	3.17038e-05	3.66757e-05	3.46672e-05	3.88538e-05	4.43367e-05	3.95262e-05	2.98411e-05	3.15759e-05	3.14519e-05	3.12255e-05	3.12463e-05	3.26857e-05
Neuron_174	0.000163975	0.000133488	0.000124156	9.23604e-05	7.96068e-05	6.81062e-05	6.17396e-05	5.39771e-05	4.52946e-05	4.80858e-05	4.60162e-05	3.99265e-05	3.79673e-05	3.83315e-05	3.6103e-05	4.20301e-05	3.40194e-05	3.44361e-05	3.35703e-05	3.72571e-05	3.5319e-05	3.38203e-05	2.74218e-05	2.85605e-05	3.54309e-05	3.09528e-05	3.66557e-05	2.58219e-05	2.75628e-05	2.79376e-05	2.84706e-05	3.05707e-05	2.86121e-05	2.68488e-05	2.5381e-05	2.67916e-05	2.57475e-05	2.70242e-05	2.41766e-05	2.42553e-05	2.68233e-05	2.78143e-05	2.66858e-05	2.26219e-05	2.28274e-05	2.20282e-05	2.09553e-05	2.32002e-05	1.96605e-05
Neuron_175	0.000231873	0.000263531	0.000196448	0.000134931	0.000107229	9.43932e-05	7.38803e-05	7.48872e-05	5.9506e-05	5.47331e-05	5.51222e-05	4.83717e-05	4.38591e-05	4.64444e-05	6.09124e-05	5.55587e-05	4.50814e-05	3.77269e-05	4.05597e-05	4.20437e-05	4.13281e-05	4.2665e-05	3.80109e-05	3.78566e-05	4.07378e-05	3.42785e-05	3.99712e-05	3.19242e-05	3.52622e-05	3.38944e-05	3.54916e-05	4.1807e-05	3.28941e-05	2.90112e-05	2.75709e-05	3.35731e-05	2.98883e-05	2.75113e-05	3.36858e-05	2.79486e-05	3.20657e-05	3.10817e-05	2.61931e-05	2.84522e-05	2.84338e-05	2.28513e-05	2.22854e-05	2.98832e-05	2.56164e-05
Neuron_176	0.000202658	0.000162261	0.00015987	0.000124717	0.000109665	9.13913e-05	7.73526e-05	7.60719e-05	6.65616e-05	6.04024e-05	7.05219e-05	6.30586e-05	6.02319e-05	6.45418e-05	8.02436e-05	5.99472e-05	5.96256e-05	4.81105e-05	5.63159e-05	6.04775e-05	4.97997e-05	5.3856e-05	5.41105e-05	5.09041e-05	4.80202e-05	4.76636e-05	5.16697e-05	4.57669e-05	4.80688e-05	4.66698e-05	4.7159e-05	4.97725e-05	5.04507e-05	4.79868e-05	4.56432e-05	4.37884e-05	4.45452e-05	3.98127e-05	4.17396e-05	4.03857e-05	4.60817e-05	3.60377e-05	3.91727e-05	3.34723e-05	3.77471e-05	4.17687e-05	2.89138e-05	3.38198e-05	3.29174e-05
Neuron_177	0.000259406	0.000234648	0.000216308	0.000165866	0.000142798	0.000123287	0.000104526	0.000103504	9.13082e-05	8.14211e-05	9.2726e-05	8.08739e-05	7.33244e-05	8.07151e-05	9.35152e-05	7.83967e-05	7.69469e-05	6.67019e-05	7.16158e-05	7.33333e-05	6.44716e-05	6.94801e-05	6.56005e-05	6.32538e-05	6.50999e-05	6.54372e-05	6.8649e-05	5.97778e-05	6.31704e-05	6.06144e-05	5.80115e-05	6.58498e-05	6.18201e-05	5.76392e-05	5.92825e-05	5.84521e-05	5.70287e-05	4.92219e-05	5.90476e-05	4.94954e-05	6.23103e-05	5.62959e-05	5.26507e-05	4.6595e-05	4.95433e-05	4.78091e-05	4.16298e-05	4.61119e-05	4.63229e-05
Neuron_178	0.000366222	0.000272192	0.000245171	0.000174476	0.000145374	0.000123953	0.000103395	0.000107748	8.85551e-05	8.45448e-05	9.00754e-05	8.20719e-05	7.16929e-05	8.64968e-05	9.25444e-05	7.74482e-05	7.66253e-05	7.20168e-05	7.27562e-05	7.77502e-05	7.17533e-05	7.83111e-05	6.4697e-05	6.48327e-05	6.80649e-05	6.25245e-05	6.94668e-05	6.2536e-05	6.41481e-05	6.23121e-05	5.67837e-05	6.32588e-05	6.22872e-05	5.32853e-05	5.34385e-05	6.4028e-05	5.6571e-05	5.33386e-05	6.49159e-05	5.53643e-05	5.99237e-05	4.86375e-05	5.63438e-05	5.46244e-05	5.88796e-05	4.58005e-05	4.26274e-05	4.91587e-05	4.36932e-05
Neuron_179	0.000191584	0.000160751	0.000132296	9.62268e-05	8.48683e-05	7.25656e-05	6.44604e-05	6.15431e-05	5.10332e-05	4.82763e-05	5.29648e-05	4.51037e-05	4.45096e-05	4.46946e-05	5.07407e-05	4.62473e-05	4.01389e-05	3.60255e-05	3.89724e-05	4.52677e-05	3.65707e-05	4.06691e-05	3.81403e-05	3.53039e-05	3.64719e-05	3.37559e-05	4.03958e-05	3.16675e-05	3.31008e-05	3.35793e-05	3.49859e-05	3.49989e-05	3.7414e-05	3.45953e-05	3.20289e-05	3.18791e-05	3.16096e-05	2.82323e-05	2.8497e-05	3.07343e-05	3.27578e-05	2.87261e-05	3.16676e-05	2.602e-05	2.56513e-05	2.94693e-05	2.24784e-05	2.57608e-05	2.4267e-05
Neuron_180	0.00031191	0.000279526	0.000245614	0.000186621	0.00016553	0.000150282	0.000137848	0.000125496	0.000108007	0.000109693	0.000109161	0.0001011	8.55795e-05	9.58166e-05	9.04223e-05	9.53656e-05	8.94408e-05	8.83357e-05	8.87347e-05	8.81807e-05	8.3281e-05	8.6055e-05	7.24603e-05	7.26025e-05	9.99442e-05	7.77956e-05	9.24001e-05	6.69575e-05	7.20644e-05	7.17265e-05	6.91294e-05	7.75182e-05	7.20319e-05	6.56479e-05	6.58754e-05	7.24371e-05	6.46641e-05	5.98347e-05	7.04536e-05	6.04677e-05	7.25459e-05	7.40477e-05	7.16012e-05	6.1954e-05	6.25986e-05	5.41665e-05	5.31238e-05	6.04508e-05	5.73452e-05
Neuron_181	0.000273125	0.000253223	0.000208878	0.000152112	0.000127959	0.000119021	9.53595e-05	9.50842e-05	7.78004e-05	7.55745e-05	7.91283e-05	6.82659e-05	5.97645e-05	6.37723e-05	6.90778e-05	6.92766e-05	5.80717e-05	5.97879e-05	5.9395e-05	5.93828e-05	5.55338e-05	5.70741e-05	5.11162e-05	5.15823e-05	6.4711e-05	5.40437e-05	5.99935e-05	4.78252e-05	4.90324e-05	5.26917e-05	4.50895e-05	6.05756e-05	4.99621e-05	4.53595e-05	4.78734e-05	4.87318e-05	4.32161e-05	3.6247e-05	4.6622e-05	4.22452e-05	4.91885e-05	5.12688e-05	4.75405e-05	3.77614e-05	3.91908e-05	3.54498e-05	3.62193e-05	3.65377e-05	4.04413e-05
Neuron_182	0.000175898	0.000154894	0.000142902	0.000114523	0.000102858	9.40398e-05	7.85102e-05	7.40022e-05	6.37171e-05	6.97118e-05	6.32657e-05	5.82415e-05	5.14614e-05	5.69474e-05	5.6212e-05	6.03686e-05	5.73083e-05	5.36535e-05	5.12296e-05	5.27788e-05	5.06705e-05	5.17365e-05	4.3204e-05	4.64739e-05	5.50589e-05	4.61692e-05	5.14356e-05	3.88597e-05	4.74236e-05	4.41943e-05	3.98877e-05	5.13673e-05	4.40867e-05	4.06109e-05	4.01902e-05	4.27736e-05	3.88174e-05	3.73489e-05	3.99409e-05	4.01185e-05	4.08726e-05	4.9066e-05	4.44166e-05	3.57104e-05	3.72192e-05	3.33023e-05	3.51175e-05	3.38928e-05	3.30199e-05
Neuron_183	0.000277761	0.000230016	0.000202295	0.000152737	0.000133362	0.000118518	0.000105615	9.7241e-05	7.96543e-05	8.14323e-05	7.88838e-05	7.45485e-05	6.52288e-05	7.30125e-05	7.55547e-05	7.78852e-05	6.91068e-05	6.31595e-05	6.47835e-05	6.66513e-05	6.19269e-05	6.62759e-05	5.70848e-05	5.4952e-05	6.91902e-05	5.25267e-05	6.15515e-05	4.93482e-05	5.52709e-05	5.06823e-05	5.40617e-05	5.64613e-05	4.93903e-05	5.04535e-05	4.85322e-05	5.23243e-05	4.57828e-05	4.79314e-05	4.93485e-05	4.48653e-05	4.96294e-05	4.94819e-05	4.83581e-05	4.53912e-05	4.70242e-05	4.23116e-05	3.94948e-05	4.53526e-05	4.02536e-05
Neuron_184	0.000143844	0.000100835	9.24109e-05	8.01386e-05	6.93133e-05	6.30985e-05	4.55195e-05	4.65178e-05	4.01371e-05	3.74072e-05	4.18473e-05	3.60596e-05	3.23606e-05	3.66453e-05	3.89441e-05	3.55655e-05	3.59024e-05	3.20015e-05	3.20397e-05	3.04172e-05	2.9371e-05	3.00699e-05	2.60328e-05	2.85985e-05	3.1672e-05	2.91013e-05	3.07302e-05	2.57453e-05	2.93676e-05	2.70781e-05	2.53238e-05	3.1404e-05	2.66899e-05	2.38134e-05	2.50181e-05	2.84176e-05	2.38626e-05	2.35784e-05	2.70293e-05	2.27339e-05	2.58325e-05	2.51678e-05	2.50067e-05	2.0558e-05	2.47692e-05	1.97834e-05	2.05472e-05	2.1004e-05	1.9809e-05
Neuron_185	0.000319872	0.000301017	0.000282531	0.000226804	0.000206264	0.000182395	0.000157603	0.000151064	0.000136689	0.000126193	0.000145283	0.000124461	0.000115051	0.000124871	0.000143661	0.000122681	0.000120627	0.000101569	0.000110362	0.000112428	9.76581e-05	0.000106044	0.000103814	9.86158e-05	0.000107551	0.000101718	0.000106956	8.91058e-05	9.914e-05	9.21199e-05	9.51379e-05	0.000106289	0.00010177	9.61521e-05	9.3855e-05	8.90521e-05	8.82253e-05	7.85734e-05	8.47708e-05	7.90938e-05	9.65354e-05	8.85926e-05	8.6823e-05	6.92703e-05	7.46488e-05	8.10512e-05	6.64718e-05	7.1985e-05	7.30367e-05
Neuron_186	0.000343447	0.000319557	0.000280222	0.000217779	0.000196025	0.00017979	0.000159936	0.000147032	0.000124786	0.000134225	0.000126505	0.000109482	0.000103294	0.000106007	0.000100957	0.000117791	0.00010262	9.95711e-05	9.49074e-05	0.00010309	9.32058e-05	9.34047e-05	7.80139e-05	8.27186e-05	0.000101101	8.98035e-05	0.000100248	7.57088e-05	8.5841e-05	8.03314e-05	7.7832e-05	8.97277e-05	8.25094e-05	7.97173e-05	7.78633e-05	8.13336e-05	7.44954e-05	7.50451e-05	6.9825e-05	7.32537e-05	7.91309e-05	9.06785e-05	8.30229e-05	6.30393e-05	6.57388e-05	6.58857e-05	6.67875e-05	6.66273e-05	5.89025e-05
Neuron_187	0.000166401	0.000137905	0.00013265	8.75682e-05	7.26088e-05	5.97848e-05	5.76926e-05	5.24358e-05	4.24454e-05	4.29898e-05	4.1368e-05	4.03095e-05	3.45813e-05	4.25068e-05	4.37765e-05	3.7022e-05	3.42523e-05	3.25098e-05	3.50713e-05	3.55329e-05	3.6438e-05	3.87731e-05	2.95918e-05	2.89041e-05	3.30245e-05	2.72006e-05	3.27182e-05	2.85639e-05	2.75244e-05	2.92508e-05	2.93307e-05	2.97866e-05	2.87768e-05	2.31177e-05	2.12739e-05	2.75378e-05	2.82639e-05	2.62344e-05	3.02771e-05	2.27365e-05	2.79091e-05	1.95627e-05	2.43278e-05	2.8055e-05	2.86051e-05	2.02021e-05	1.87414e-05	2.37545e-05	1.91038e-05
Neuron_188	0.000338041	0.000276518	0.000240433	0.000168508	0.000140309	0.000124061	0.000103378	9.94559e-05	7.55371e-05	7.40758e-05	7.73394e-05	6.62596e-05	5.93897e-05	6.2893e-05	5.92921e-05	7.50734e-05	5.84195e-05	6.26259e-05	5.74238e-05	6.32274e-05	5.76653e-05	5.96185e-05	4.62559e-05	4.83295e-05	6.32802e-05	5.15558e-05	6.00798e-05	5.03651e-05	4.72555e-05	4.62881e-05	4.14407e-05	4.93432e-05	4.54067e-05	4.40548e-05	4.56293e-05	5.16302e-05	4.33799e-05	4.55503e-05	4.75145e-05	4.47035e-05	4.29231e-05	4.0837e-05	4.33373e-05	4.06115e-05	4.59646e-05	3.63072e-05	3.72081e-05	4.07092e-05	3.41443e-05
Neuron_189	0.000222813	0.000192509	0.000166917	0.000132269	0.000112953	0.000105775	8.68209e-05	8.15943e-05	6.97213e-05	7.07734e-05	7.1226e-05	6.5573e-05	5.7792e-05	6.31603e-05	7.00773e-05	6.93204e-05	6.21093e-05	5.71825e-05	5.64785e-05	5.82869e-05	5.29706e-05	5.38698e-05	5.03361e-05	5.05079e-05	5.99916e-05	4.77253e-05	5.26393e-05	4.48055e-05	5.02293e-05	4.35593e-05	4.68542e-05	5.07815e-05	4.22075e-05	4.56193e-05	4.47761e-05	4.44309e-05	3.82486e-05	4.00426e-05	4.2833e-05	3.92739e-05	4.44205e-05	4.67899e-05	4.21022e-05	3.56414e-05	3.925e-05	3.794e-05	3.49557e-05	3.72323e-05	3.55403e-05
Neuron_190	0.000211324	0.000206009	0.000184415	0.00013479	0.00010124	9.22717e-05	7.88182e-05	7.02805e-05	6.37845e-05	5.93793e-05	5.90337e-05	5.44076e-05	4.74802e-05	5.69224e-05	6.28982e-05	5.14753e-05	4.79367e-05	3.99154e-05	4.63042e-05	4.65417e-05	4.50767e-05	4.5965e-05	4.18039e-05	3.91095e-05	4.42038e-05	3.72221e-05	4.05473e-05	3.35037e-05	3.72051e-05	3.39487e-05	4.13203e-05	3.86314e-05	3.48132e-05	3.34103e-05	2.73004e-05	3.16171e-05	3.16709e-05	2.99555e-05	3.60926e-05	2.56726e-05	3.87297e-05	3.41207e-05	3.14971e-05	3.1313e-05	2.95166e-05	2.65284e-05	2.42147e-05	3.00235e-05	2.67083e-05
Neuron_191	0.000272886	0.000242824	0.000228207	0.000172788	0.000156845	0.000138806	0.000124113	0.000115393	9.63043e-05	9.98595e-05	9.54971e-05	8.58411e-05	8.34947e-05	9.12006e-05	8.77468e-05	8.63013e-05	8.06776e-05	7.54624e-05	7.49153e-05	8.3298e-05	7.59551e-05	7.85626e-05	7.07085e-05	6.81481e-05	7.68067e-05	7.52772e-05	7.70202e-05	5.96387e-05	6.90186e-05	6.85993e-05	6.1184e-05	7.50113e-05	7.04679e-05	6.31516e-05	6.19331e-05	6.56098e-05	6.0093e-05	5.5663e-05	6.2005e-05	5.84628e-05	6.66158e-05	6.65736e-05	6.59768e-05	5.34474e-05	5.35349e-05	5.2636e-05	4.9827e-05	4.89207e-05	5.01294e-05
Neuron_192	0.00015995	0.000145833	0.000128551	0.000106409	9.47799e-05	8.66102e-05	7.41124e-05	6.81854e-05	5.71296e-05	6.06128e-05	5.71956e-05	5.26838e-05	4.88116e-05	5.38132e-05	5.41498e-05	5.35498e-05	5.07198e-05	4.4879e-05	4.59379e-05	4.55025e-05	4.50621e-05	4.49222e-05	3.97189e-05	4.07106e-05	4.90844e-05	4.16579e-05	4.36514e-05	3.26111e-05	4.13092e-05	3.7927e-05	3.71872e-05	4.40705e-05	3.66178e-05	3.55784e-05	3.37834e-05	3.70976e-05	3.31261e-05	3.2866e-05	3.50145e-05	3.22232e-05	3.7339e-05	4.214e-05	3.67321e-05	3.12502e-05	3.11556e-05	2.9217e-05	3.03324e-05	2.95783e-05	2.99543e-05
Neuron_193	0.000267004	0.000273884	0.000230117	0.000176084	0.000149063	0.000138565	0.000119979	0.000107845	9.58031e-05	9.3348e-05	9.09264e-05	8.66162e-05	7.78314e-05	9.0511e-05	9.99932e-05	8.57285e-05	8.06308e-05	6.73214e-05	7.43176e-05	7.37622e-05	7.1758e-05	7.26098e-05	6.87572e-05	6.50998e-05	7.34869e-05	6.31662e-05	6.26528e-05	5.51189e-05	6.42835e-05	5.67571e-05	6.37426e-05	6.631e-05	5.48034e-05	5.5455e-05	5.15552e-05	5.3737e-05	5.02772e-05	5.03692e-05	5.74652e-05	4.53979e-05	6.15051e-05	5.75545e-05	5.1903e-05	4.88015e-05	4.94434e-05	4.60175e-05	4.24618e-05	4.75049e-05	4.47866e-05
Neuron_194	0.000323675	0.000334856	0.000283256	0.000200202	0.000171684	0.0001468	0.000129711	0.000121401	0.000107856	0.000102997	9.95551e-05	9.37281e-05	8.53041e-05	9.34785e-05	9.27328e-05	9.11737e-05	8.3757e-05	7.91469e-05	8.13919e-05	8.61226e-05	8.06761e-05	8.48756e-05	7.27085e-05	7.17559e-05	7.80877e-05	7.60469e-05	8.11933e-05	6.11155e-05	6.93037e-05	7.23142e-05	6.62824e-05	7.36419e-05	7.07254e-05	6.07195e-05	6.16695e-05	6.98004e-05	6.05204e-05	5.64138e-05	6.79345e-05	5.75662e-05	6.88164e-05	6.73422e-05	6.40526e-05	5.85372e-05	5.72831e-05	4.98969e-05	4.82824e-05	5.53194e-05	5.0269e-05
Neuron_195	0.000322665	0.000264195	0.000245431	0.000191988	0.000173084	0.000149223	0.00012994	0.000122805	0.000101049	0.000102553	0.000102148	9.04701e-05	9.14527e-05	9.16146e-05	9.33759e-05	9.22892e-05	8.26666e-05	7.44362e-05	7.63303e-05	8.93698e-05	7.61302e-05	7.9236e-05	7.34015e-05	7.15766e-05	7.4911e-05	7.75619e-05	8.25448e-05	5.92536e-05	7.04917e-05	6.88908e-05	6.36607e-05	7.62841e-05	7.4093e-05	6.77496e-05	6.52096e-05	6.66571e-05	6.05886e-05	5.79215e-05	5.80301e-05	6.35757e-05	6.50584e-05	6.52923e-05	6.87035e-05	5.17117e-05	5.13138e-05	5.7008e-05	4.93432e-05	5.08676e-05	4.79389e-05
Neuron_196	0.000166317	0.00017129	0.000144449	0.000110786	8.65475e-05	7.44788e-05	5.43395e-05	5.6275e-05	4.99263e-05	3.92056e-05	4.81036e-05	3.91775e-05	3.75899e-05	3.86518e-05	5.03446e-05	4.00883e-05	3.19655e-05	2.98015e-05	3.30675e-05	3.35551e-05	3.03523e-05	3.17292e-05	3.00215e-05	2.98799e-05	3.25222e-05	3.14145e-05	3.31694e-05	2.51894e-05	2.59708e-05	2.883e-05	2.7863e-05	3.31267e-05	2.99375e-05	2.72449e-05	2.47806e-05	2.61885e-05	2.56762e-05	2.24069e-05	2.61576e-05	2.44458e-05	2.78379e-05	2.45969e-05	2.39018e-05	1.94192e-05	2.09483e-05	2.17752e-05	1.78842e-05	2.26525e-05	2.18785e-05
Neuron_197	0.000221254	0.000220889	0.000202495	0.000165401	0.000145832	0.000128499	0.000105379	0.000104412	9.35928e-05	8.73258e-05	0.000100038	8.19382e-05	7.66561e-05	8.14151e-05	9.4938e-05	8.63072e-05	8.08325e-05	7.24951e-05	7.25046e-05	7.38124e-05	6.54619e-05	6.89682e-05	6.70204e-05	6.90013e-05	7.46847e-05	6.86196e-05	7.3289e-05	6.12773e-05	6.78521e-05	6.25225e-05	6.22389e-05	7.6738e-05	6.90376e-05	6.4184e-05	6.323e-05	6.05618e-05	5.86992e-05	5.20656e-05	5.70459e-05	5.69051e-05	6.27222e-05	6.34257e-05	6.09254e-05	4.5484e-05	4.91814e-05	5.29021e-05	4.63017e-05	4.84475e-05	5.06614e-05
Neuron_198	0.000254105	0.000208168	0.000197957	0.000149861	0.00013399	0.000111094	9.93774e-05	8.74757e-05	7.59609e-05	7.48129e-05	7.48422e-05	6.77065e-05	6.13439e-05	6.71454e-05	6.67744e-05	6.9151e-05	6.04559e-05	5.71917e-05	5.89918e-05	6.00889e-05	5.8766e-05	6.3055e-05	4.83282e-05	5.0255e-05	6.02349e-05	5.04732e-05	5.97835e-05	4.51486e-05	4.85111e-05	4.93655e-05	4.99907e-05	5.56328e-05	5.22258e-05	4.45388e-05	4.42176e-05	4.91822e-05	4.70519e-05	4.67684e-05	4.5443e-05	4.04266e-05	4.65164e-05	4.22505e-05	4.5818e-05	4.22358e-05	4.36939e-05	3.72654e-05	3.5872e-05	4.17611e-05	3.46566e-05
Neuron_199	0.000204452	0.000160845	0.000149147	0.000125579	0.000112614	0.000102062	8.33869e-05	8.02177e-05	6.96025e-05	6.80956e-05	7.26635e-05	6.43767e-05	5.75583e-05	6.38123e-05	6.33193e-05	6.38448e-05	6.35925e-05	5.78354e-05	5.76993e-05	5.5555e-05	5.09041e-05	5.64279e-05	4.68272e-05	4.86911e-05	6.00074e-05	5.14988e-05	5.70659e-05	4.60469e-05	5.21021e-05	4.79022e-05	4.53389e-05	5.50779e-05	5.02618e-05	4.43834e-05	4.65616e-05	5.07052e-05	4.49754e-05	4.27721e-05	4.62815e-05	4.06463e-05	4.71838e-05	4.73337e-05	4.84299e-05	3.87725e-05	4.36585e-05	3.72578e-05	3.7807e-05	3.91329e-05	3.49121e-05
Neuron_200	0.00013716	0.000138022	0.000126049	0.000107355	8.70952e-05	8.62975e-05	7.36059e-05	7.04463e-05	6.02188e-05	5.96661e-05	6.35657e-05	5.67916e-05	4.93443e-05	5.23197e-05	5.82602e-05	5.65125e-05	5.27783e-05	4.88474e-05	4.91568e-05	4.79668e-05	4.28443e-05	4.1734e-05	4.1755e-05	4.12806e-05	5.32411e-05	4.47074e-05	4.76903e-05	3.94441e-05	4.33085e-05	3.68504e-05	4.06739e-05	4.28317e-05	3.65854e-05	3.83855e-05	3.84046e-05	3.99429e-05	3.25315e-05	3.47543e-05	3.68613e-05	3.23144e-05	4.07664e-05	4.26902e-05	3.76937e-05	2.97718e-05	3.18591e-05	3.2067e-05	3.08979e-05	3.44322e-05	3.39782e-05
Neuron_201	0.000165294	0.000159054	0.000138542	9.30212e-05	7.20889e-05	5.90099e-05	4.88507e-05	4.95286e-05	3.97713e-05	3.78087e-05	3.67446e-05	3.25534e-05	3.00603e-05	3.15569e-05	3.83944e-05	3.29038e-05	2.8133e-05	2.55566e-05	2.68668e-05	2.74793e-05	2.82258e-05	2.82315e-05	2.50082e-05	2.52569e-05	2.51589e-05	2.52631e-05	2.71742e-05	2.21606e-05	2.36086e-05	2.5675e-05	2.25037e-05	2.91602e-05	2.4226e-05	1.92934e-05	1.94634e-05	2.30646e-05	2.18554e-05	1.84936e-05	2.40026e-05	2.0012e-05	2.33567e-05	2.04686e-05	1.98395e-05	1.91611e-05	2.015e-05	1.56054e-05	1.61031e-05	1.6694e-05	1.67709e-05
Neuron_202	0.000237862	0.000225782	0.000187354	0.000155197	0.00012266	0.000112956	9.68229e-05	9.27585e-05	8.49331e-05	7.40725e-05	8.1892e-05	7.3914e-05	6.5993e-05	7.39457e-05	8.38337e-05	7.12546e-05	6.49311e-05	5.86377e-05	6.39792e-05	6.40125e-05	5.59665e-05	5.58194e-05	5.82667e-05	5.44452e-05	6.42071e-05	5.62735e-05	6.13202e-05	4.8987e-05	5.39949e-05	4.93998e-05	5.24319e-05	5.62382e-05	5.07848e-05	4.78945e-05	4.70418e-05	4.97156e-05	4.34965e-05	4.38622e-05	4.71281e-05	4.09866e-05	5.3432e-05	4.91142e-05	4.6968e-05	3.72835e-05	4.15543e-05	4.14258e-05	3.48782e-05	4.4588e-05	4.10317e-05
Neuron_203	0.000207597	0.000186793	0.000180081	0.000151218	0.00014274	0.000128917	0.000114181	0.000107087	9.35079e-05	9.4745e-05	9.31197e-05	8.23602e-05	7.53059e-05	7.97549e-05	7.62781e-05	8.50744e-05	7.86522e-05	7.60647e-05	7.26496e-05	7.3992e-05	6.73414e-05	7.26494e-05	6.1086e-05	6.28891e-05	8.12196e-05	6.94904e-05	7.80837e-05	5.58246e-05	6.67964e-05	6.19222e-05	5.65968e-05	7.2444e-05	6.63001e-05	5.92685e-05	6.23028e-05	6.06944e-05	5.64139e-05	5.12479e-05	5.50027e-05	5.55238e-05	6.10013e-05	6.94664e-05	6.67346e-05	5.0067e-05	5.11176e-05	4.92225e-05	5.0526e-05	4.98275e-05	4.67502e-05
Neuron_204	0.000247103	0.000233281	0.000205827	0.000152544	0.000138634	0.000118122	0.00010194	9.7668e-05	8.35967e-05	8.04816e-05	8.6466e-05	7.32036e-05	7.09744e-05	7.43403e-05	8.34148e-05	7.51161e-05	6.80167e-05	6.06498e-05	6.36415e-05	7.09961e-05	5.99815e-05	6.63489e-05	5.96259e-05	5.67604e-05	6.23166e-05	5.72296e-05	6.25902e-05	5.18506e-05	5.59337e-05	5.51996e-05	5.43823e-05	5.91419e-05	6.01417e-05	5.6279e-05	5.24247e-05	5.08236e-05	5.25236e-05	4.8556e-05	4.76529e-05	4.93252e-05	5.35111e-05	4.86918e-05	5.06338e-05	4.14741e-05	4.32966e-05	4.69114e-05	3.85552e-05	4.08533e-05	3.94453e-05
Neuron_205	0.000345911	0.000328058	0.000279289	0.000203985	0.000178824	0.000149056	0.000138196	0.000128869	0.000115452	0.000108394	0.000112951	9.90856e-05	8.96341e-05	9.96714e-05	0.00010534	0.00010072	8.95739e-05	8.40326e-05	8.75517e-05	9.21263e-05	8.16741e-05	9.25909e-05	7.84431e-05	7.6476e-05	8.88263e-05	7.78458e-05	9.03049e-05	6.86199e-05	7.24168e-05	7.59836e-05	7.58162e-05	8.04998e-05	7.9422e-05	6.97773e-05	6.80384e-05	7.08758e-05	7.01692e-05	6.51348e-05	6.80023e-05	6.28226e-05	7.34901e-05	6.86008e-05	7.04254e-05	6.04137e-05	6.20904e-05	5.80281e-05	5.22818e-05	6.21294e-05	5.18679e-05
Neuron_206	0.000143436	0.00013589	0.00012282	9.93502e-05	8.18036e-05	7.74702e-05	6.71707e-05	6.48866e-05	5.57445e-05	5.33961e-05	5.77228e-05	5.04205e-05	4.23725e-05	4.59817e-05	4.35649e-05	4.93036e-05	4.48356e-05	4.58657e-05	4.48643e-05	4.29964e-05	3.88236e-05	4.03897e-05	3.60913e-05	3.67251e-05	5.13038e-05	4.10282e-05	4.75518e-05	3.4191e-05	3.77342e-05	3.50128e-05	3.25032e-05	3.87651e-05	3.49112e-05	3.21405e-05	3.53211e-05	3.56761e-05	3.05935e-05	2.82787e-05	3.41852e-05	3.08936e-05	3.61872e-05	3.93236e-05	3.66338e-05	2.89793e-05	3.00655e-05	2.63927e-05	2.77061e-05	3.00321e-05	2.93132e-05
Neuron_207	0.000206123	0.000149242	0.000132634	0.000110405	0.000106837	9.12794e-05	7.81782e-05	7.83899e-05	6.8345e-05	6.52964e-05	7.31501e-05	6.32343e-05	6.21755e-05	6.2921e-05	7.08769e-05	6.30199e-05	6.17069e-05	5.20634e-05	5.50375e-05	6.27824e-05	5.06812e-05	5.68122e-05	5.39137e-05	5.26966e-05	5.19468e-05	5.16287e-05	5.76881e-05	4.46301e-05	5.27056e-05	4.92887e-05	4.89555e-05	5.42874e-05	5.46697e-05	5.14362e-05	5.05414e-05	4.83683e-05	4.40891e-05	4.11768e-05	4.14393e-05	4.65337e-05	4.77655e-05	4.69564e-05	4.89645e-05	3.69073e-05	3.73605e-05	4.43241e-05	3.48914e-05	3.65486e-05	3.58758e-05
Neuron_208	0.000162346	0.000159957	0.000145319	0.000122172	0.000115303	0.000112058	9.0934e-05	8.73919e-05	8.00188e-05	8.35688e-05	8.08025e-05	7.1446e-05	6.43801e-05	7.15884e-05	7.21206e-05	7.44089e-05	7.18261e-05	6.82483e-05	6.41086e-05	6.54523e-05	6.13211e-05	6.29857e-05	5.41749e-05	5.86136e-05	6.67465e-05	5.93871e-05	6.21384e-05	4.95001e-05	6.07767e-05	5.33084e-05	4.98604e-05	6.4168e-05	5.5019e-05	5.30942e-05	5.14035e-05	5.2606e-05	4.82772e-05	4.58485e-05	4.8826e-05	5.13645e-05	5.31789e-05	6.4657e-05	5.66114e-05	4.2855e-05	4.4649e-05	4.30322e-05	4.53722e-05	4.10761e-05	4.039e-05
Neuron_209	0.000237716	0.000211354	0.000184928	0.000129594	0.000102306	9.1341e-05	8.315e-05	7.46581e-05	6.46608e-05	6.78528e-05	6.21017e-05	5.91263e-05	4.88302e-05	6.18464e-05	6.56122e-05	5.32971e-05	5.11314e-05	4.52347e-05	5.11543e-05	5.05089e-05	4.97254e-05	5.27499e-05	4.48225e-05	4.235e-05	4.91417e-05	3.81071e-05	4.39224e-05	3.86091e-05	3.95634e-05	3.90855e-05	4.39853e-05	4.27878e-05	3.89187e-05	3.49432e-05	2.90155e-05	3.64261e-05	3.74758e-05	3.5294e-05	3.98201e-05	3.12835e-05	4.22954e-05	3.54628e-05	3.57279e-05	3.68245e-05	3.56948e-05	2.8497e-05	2.77941e-05	3.38985e-05	2.95259e-05
Neuron_210	0.000279119	0.000255108	0.000235697	0.000163386	0.000131027	0.000114256	0.000103979	8.8759e-05	7.46567e-05	7.39082e-05	7.17038e-05	6.1934e-05	5.73641e-05	6.64173e-05	7.26242e-05	6.75938e-05	5.51009e-05	4.65972e-05	5.1906e-05	5.7454e-05	5.48382e-05	5.53309e-05	4.73738e-05	4.4316e-05	5.08582e-05	4.243e-05	4.91272e-05	4.02623e-05	4.23439e-05	3.90627e-05	4.89405e-05	4.55486e-05	3.99122e-05	3.99478e-05	3.29107e-05	3.62889e-05	3.8562e-05	3.97686e-05	3.87349e-05	2.98909e-05	4.28226e-05	3.65492e-05	3.46545e-05	3.62532e-05	3.52173e-05	3.24744e-05	2.84518e-05	3.59282e-05	2.93954e-05
Neuron_211	0.000321256	0.000292363	0.000261909	0.000193622	0.000167556	0.00013689	0.000117151	0.000107039	9.42951e-05	8.85344e-05	9.27991e-05	7.87991e-05	7.52555e-05	7.83548e-05	8.74778e-05	8.47017e-05	6.83969e-05	6.47189e-05	6.68927e-05	7.44763e-05	6.74305e-05	7.06723e-05	5.93332e-05	6.0618e-05	6.64584e-05	6.07424e-05	6.9583e-05	5.35599e-05	5.53866e-05	5.69644e-05	5.90145e-05	6.50898e-05	6.27331e-05	5.76686e-05	5.39916e-05	5.29198e-05	5.50026e-05	5.30354e-05	4.96767e-05	5.10058e-05	5.34129e-05	4.88635e-05	5.10861e-05	4.42411e-05	4.58655e-05	4.7754e-05	3.98798e-05	4.60855e-05	4.05984e-05
Neuron_212	0.000241491	0.000236277	0.000187529	0.000141369	0.000118531	0.000100737	8.85785e-05	8.34022e-05	7.00499e-05	6.53878e-05	6.53586e-05	6.06609e-05	5.90868e-05	6.50342e-05	7.00228e-05	5.67063e-05	5.29385e-05	4.63264e-05	5.17317e-05	5.32856e-05	4.91877e-05	5.48084e-05	4.87733e-05	4.40924e-05	5.12691e-05	4.44431e-05	4.85468e-05	3.88331e-05	4.22645e-05	4.41705e-05	4.4201e-05	4.59185e-05	4.6023e-05	3.73363e-05	3.61142e-05	3.97105e-05	3.95244e-05	3.54218e-05	4.04023e-05	3.36472e-05	4.43641e-05	3.50153e-05	3.89537e-05	3.63896e-05	3.61999e-05	3.16553e-05	2.82189e-05	3.27682e-05	3.08733e-05
Neuron_213	0.000371587	0.00032508	0.000301973	0.000204318	0.000178202	0.000156162	0.000143623	0.000128577	0.000106611	0.000113792	0.000105637	9.69535e-05	8.35028e-05	9.94275e-05	9.65866e-05	9.63607e-05	8.67245e-05	8.3199e-05	8.56623e-05	9.08315e-05	8.8862e-05	9.30968e-05	7.08464e-05	7.19475e-05	8.88597e-05	7.01942e-05	8.26562e-05	6.63185e-05	6.86483e-05	6.80034e-05	6.8029e-05	7.44499e-05	6.74284e-05	6.13467e-05	5.64382e-05	6.71641e-05	6.47511e-05	6.44604e-05	6.83624e-05	6.00719e-05	6.68248e-05	6.26081e-05	6.41145e-05	6.54384e-05	6.49487e-05	4.98021e-05	5.07412e-05	5.72236e-05	4.82906e-05
Neuron_214	0.000342951	0.000288391	0.000269937	0.000191273	0.00015725	0.000136842	0.000122446	0.000115053	9.8897e-05	8.87445e-05	9.66003e-05	8.74668e-05	7.56975e-05	7.94662e-05	9.0826e-05	8.44431e-05	6.94942e-05	6.96313e-05	7.44938e-05	7.88856e-05	6.83895e-05	7.25475e-05	6.41664e-05	6.31241e-05	7.25492e-05	6.31385e-05	7.63782e-05	6.05605e-05	5.81779e-05	5.99801e-05	6.0117e-05	6.41537e-05	6.56384e-05	5.79693e-05	5.78127e-05	5.39004e-05	5.53922e-05	4.70244e-05	5.37786e-05	5.17123e-05	6.01276e-05	5.37089e-05	5.54661e-05	4.71751e-05	4.6579e-05	4.79155e-05	3.89714e-05	4.79914e-05	4.42664e-05
Neuron_215	0.000284034	0.000214579	0.000172	0.00013372	0.00011438	0.000101835	8.65478e-05	8.72434e-05	6.96862e-05	6.50889e-05	7.19289e-05	6.7012e-05	5.4812e-05	5.83032e-05	5.50135e-05	6.52314e-05	5.70295e-05	5.94838e-05	5.87708e-05	5.72597e-05	5.26491e-05	5.72993e-05	4.71644e-05	4.69243e-05	6.32785e-05	4.86033e-05	6.02518e-05	4.6253e-05	4.69745e-05	4.7705e-05	4.37049e-05	4.88014e-05	4.6746e-05	4.18173e-05	4.52216e-05	5.15585e-05	4.02546e-05	3.93209e-05	4.68665e-05	4.14665e-05	4.50442e-05	4.37865e-05	4.57124e-05	4.15572e-05	4.20361e-05	3.55549e-05	3.47267e-05	4.16726e-05	3.73749e-05
Neuron_216	0.00021287	0.000191708	0.000189792	0.000138525	0.000113704	0.000109117	9.55939e-05	9.4821e-05	7.67597e-05	7.57224e-05	8.22864e-05	7.58196e-05	5.97274e-05	6.60361e-05	6.79721e-05	6.84989e-05	6.60978e-05	6.78842e-05	6.6886e-05	6.43816e-05	5.91001e-05	5.94597e-05	5.17438e-05	5.18945e-05	7.05534e-05	5.76129e-05	6.6965e-05	5.63471e-05	5.59798e-05	5.14261e-05	4.63663e-05	5.45771e-05	5.04487e-05	4.76287e-05	5.09165e-05	5.63194e-05	4.80835e-05	4.21788e-05	5.61334e-05	4.37988e-05	5.42155e-05	5.44316e-05	4.99855e-05	4.39919e-05	4.77356e-05	3.86103e-05	3.84332e-05	4.26518e-05	4.40922e-05
Neuron_217	0.000246044	0.000217763	0.000203708	0.000171026	0.000149037	0.000141268	0.000118848	0.000113325	9.66335e-05	9.92074e-05	0.000102022	9.47156e-05	7.9883e-05	9.01933e-05	9.64479e-05	9.16935e-05	9.09584e-05	8.22941e-05	8.28356e-05	8.04133e-05	7.23057e-05	7.37737e-05	7.09228e-05	7.11214e-05	8.80783e-05	6.92528e-05	7.57912e-05	6.37875e-05	7.29853e-05	6.1827e-05	6.61659e-05	7.11616e-05	6.09013e-05	6.42691e-05	6.26448e-05	6.51469e-05	5.44116e-05	5.5822e-05	6.22417e-05	5.54973e-05	6.49057e-05	7.05466e-05	6.34836e-05	5.15479e-05	5.48552e-05	5.32455e-05	5.09026e-05	5.54058e-05	5.2889e-05
Neuron_218	0.000255872	0.000184453	0.000165913	0.000133458	0.000115611	0.000104959	9.12021e-05	8.98316e-05	7.11415e-05	6.86544e-05	7.28361e-05	6.66419e-05	5.63518e-05	6.12924e-05	6.35319e-05	6.77654e-05	6.04259e-05	5.88611e-05	5.88413e-05	5.90512e-05	5.25258e-05	5.55707e-05	5.0325e-05	4.89182e-05	6.29154e-05	4.78436e-05	5.76802e-05	4.77e-05	4.93239e-05	4.61981e-05	4.43029e-05	4.88419e-05	4.54533e-05	4.51706e-05	4.71647e-05	4.92287e-05	4.12088e-05	4.10567e-05	4.45651e-05	4.1197e-05	4.50904e-05	4.51284e-05	4.48672e-05	3.90795e-05	4.22308e-05	3.83265e-05	3.5212e-05	4.00226e-05	3.706e-05
Neuron_219	0.000275102	0.000250188	0.000213847	0.000158456	0.000138279	0.000116098	0.000106152	9.69779e-05	7.98909e-05	7.93029e-05	7.50569e-05	6.92812e-05	7.1426e-05	7.7129e-05	7.13185e-05	6.85996e-05	6.323e-05	5.65401e-05	5.95873e-05	6.67111e-05	6.14473e-05	6.33591e-05	5.79526e-05	5.22625e-05	5.91745e-05	5.88348e-05	5.82229e-05	4.3972e-05	5.32925e-05	5.43751e-05	4.91531e-05	5.68518e-05	5.33373e-05	4.52383e-05	4.54388e-05	5.17041e-05	4.65485e-05	4.45628e-05	5.05871e-05	4.20706e-05	5.2308e-05	4.71938e-05	4.8742e-05	4.42192e-05	4.46327e-05	3.91304e-05	3.7639e-05	3.79378e-05	3.85366e-05
Neuron_220	0.000135588	0.000124235	0.000117968	9.36463e-05	8.08276e-05	7.6062e-05	6.74715e-05	6.42405e-05	5.43074e-05	5.48708e-05	5.68315e-05	5.31987e-05	4.48234e-05	4.82589e-05	5.11021e-05	5.01468e-05	4.78757e-05	4.615e-05	4.59921e-05	4.48535e-05	4.18391e-05	4.14001e-05	3.80857e-05	3.82904e-05	5.00959e-05	3.92489e-05	4.51124e-05	3.63445e-05	3.86e-05	3.53141e-05	3.7339e-05	3.81456e-05	3.45313e-05	3.54181e-05	3.51661e-05	3.78402e-05	3.14305e-05	3.1072e-05	3.60484e-05	2.95674e-05	3.73092e-05	3.76789e-05	3.47442e-05	3.00611e-05	3.08302e-05	2.88598e-05	2.70188e-05	3.05932e-05	3.0058e-05
Neuron_221	7.1621e-05	7.63676e-05	6.27155e-05	4.82633e-05	3.71283e-05	3.22231e-05	2.42422e-05	2.52098e-05	2.30895e-05	1.85004e-05	2.21584e-05	2.06608e-05	1.71882e-05	1.77596e-05	2.43823e-05	1.81661e-05	1.54335e-05	1.55195e-05	1.74326e-05	1.62486e-05	1.53328e-05	1.55184e-05	1.42485e-05	1.37106e-05	1.49386e-05	1.41864e-05	1.5256e-05	1.34466e-05	1.2803e-05	1.35211e-05	1.31735e-05	1.51912e-05	1.34268e-05	1.21651e-05	1.16304e-05	1.32959e-05	1.2238e-05	1.05278e-05	1.39099e-05	1.10842e-05	1.34904e-05	1.14781e-05	1.00958e-05	9.81545e-06	1.11478e-05	9.83257e-06	7.75113e-06	1.03147e-05	1.00009e-05
Neuron_222	0.000193494	0.000139317	0.000142604	0.000125164	0.000109851	0.00010735	8.80422e-05	8.65261e-05	7.11499e-05	7.49336e-05	7.72592e-05	7.16075e-05	5.98485e-05	6.47133e-05	6.86513e-05	7.02679e-05	7.0779e-05	6.52605e-05	6.35645e-05	6.02944e-05	5.35223e-05	5.39837e-05	5.12331e-05	5.45841e-05	6.81547e-05	5.63231e-05	6.08108e-05	5.1025e-05	5.86279e-05	4.92166e-05	4.67167e-05	5.6603e-05	4.68124e-05	4.99049e-05	5.19925e-05	5.34877e-05	4.38784e-05	4.30849e-05	4.92409e-05	4.59529e-05	5.00206e-05	5.91928e-05	5.263e-05	3.94292e-05	4.44352e-05	4.11291e-05	4.25711e-05	4.17612e-05	4.22318e-05
Neuron_223	0.000270219	0.000280895	0.000239258	0.000183985	0.0001581	0.000137114	0.00011485	0.000108162	0.000100058	8.81342e-05	9.62184e-05	8.43798e-05	7.9427e-05	8.67434e-05	9.86742e-05	8.37934e-05	7.90128e-05	6.80389e-05	7.45143e-05	7.70744e-05	6.78752e-05	7.31414e-05	7.10575e-05	6.65786e-05	7.11209e-05	6.96277e-05	7.08e-05	5.89128e-05	6.44461e-05	6.44385e-05	6.18978e-05	7.10649e-05	6.60363e-05	5.95221e-05	6.09066e-05	6.076e-05	5.79278e-05	5.04324e-05	5.97499e-05	5.04117e-05	6.49814e-05	5.81245e-05	5.61891e-05	4.77084e-05	4.9593e-05	4.95802e-05	4.257e-05	4.87237e-05	4.75053e-05
Neuron_224	0.000325486	0.000285559	0.000270043	0.000207031	0.000168566	0.000160041	0.000137322	0.000128367	0.000107815	0.000104541	0.000109436	9.24815e-05	8.99709e-05	9.1658e-05	9.64869e-05	9.36386e-05	8.09184e-05	7.82629e-05	7.79453e-05	8.76479e-05	7.85693e-05	7.8687e-05	7.16462e-05	6.91705e-05	8.04579e-05	7.60937e-05	8.85715e-05	6.07164e-05	6.99214e-05	6.75729e-05	6.64436e-05	7.44645e-05	7.04477e-05	6.36522e-05	5.86469e-05	6.53582e-05	5.83756e-05	5.39948e-05	6.0652e-05	5.98365e-05	6.83495e-05	6.95847e-05	6.90127e-05	5.40899e-05	5.12224e-05	5.33038e-05	4.75324e-05	5.53803e-05	5.0954e-05
Neuron_225	0.000262289	0.000265363	0.000229372	0.00016222	0.000121743	0.000107311	8.79541e-05	8.55386e-05	7.25343e-05	6.5555e-05	6.8825e-05	6.17076e-05	5.61678e-05	6.23603e-05	6.89523e-05	6.37567e-05	5.24281e-05	5.05926e-05	5.32611e-05	5.50969e-05	4.90167e-05	4.9358e-05	4.91957e-05	4.58107e-05	5.52396e-05	4.91029e-05	5.19196e-05	4.1993e-05	4.33171e-05	4.28854e-05	4.00359e-05	4.84625e-05	4.16364e-05	3.63205e-05	3.82448e-05	4.29425e-05	3.77648e-05	3.56231e-05	4.13191e-05	3.59598e-05	4.21673e-05	3.83347e-05	3.86006e-05	3.28882e-05	3.76817e-05	3.06455e-05	2.98327e-05	3.64726e-05	3.18945e-05
Neuron_226	0.000346595	0.000319056	0.000285199	0.000195809	0.000156744	0.000139015	0.000121127	0.000109714	9.32469e-05	8.83388e-05	9.25682e-05	8.41192e-05	7.86433e-05	9.12235e-05	9.79177e-05	8.11016e-05	7.45937e-05	6.65619e-05	7.28749e-05	7.81776e-05	7.17436e-05	7.46019e-05	6.47157e-05	6.08107e-05	6.84999e-05	6.16086e-05	6.40302e-05	5.95415e-05	6.02533e-05	5.66936e-05	5.77793e-05	6.22578e-05	5.69642e-05	5.31386e-05	4.97063e-05	5.37733e-05	5.39741e-05	5.36577e-05	5.85936e-05	4.80937e-05	6.00207e-05	4.67655e-05	4.86778e-05	4.94558e-05	5.45667e-05	4.56609e-05	4.01498e-05	4.40346e-05	4.06889e-05
Neuron_227	0.000199523	0.000221128	0.000174531	0.00013165	0.000105726	9.09138e-05	7.63428e-05	7.49256e-05	6.57389e-05	5.89703e-05	6.10273e-05	5.35635e-05	4.75518e-05	5.24363e-05	6.21604e-05	5.81999e-05	4.91898e-05	4.32961e-05	4.63936e-05	4.8513e-05	4.38693e-05	4.49184e-05	4.1149e-05	4.04096e-05	4.72049e-05	4.15352e-05	4.69707e-05	3.77164e-05	3.98906e-05	3.84041e-05	3.87878e-05	4.49427e-05	3.81527e-05	3.33462e-05	3.42292e-05	4.02598e-05	3.60363e-05	3.54284e-05	3.91011e-05	3.10482e-05	3.81235e-05	3.61916e-05	3.43911e-05	3.03816e-05	3.39623e-05	2.76874e-05	2.63029e-05	3.4438e-05	2.70057e-05
Neuron_228	0.000388127	0.000344396	0.00030968	0.000224133	0.000165876	0.000157015	0.00013684	0.000124609	0.000108558	0.000106347	0.000105772	9.90587e-05	8.31797e-05	0.000105174	0.000113822	8.8501e-05	8.56491e-05	7.49194e-05	8.6351e-05	8.22553e-05	7.98883e-05	8.13e-05	7.59351e-05	6.89024e-05	8.08848e-05	6.671e-05	7.15867e-05	6.58432e-05	6.99353e-05	6.35443e-05	7.18753e-05	7.24206e-05	6.10419e-05	5.85072e-05	5.12215e-05	5.96402e-05	5.78754e-05	5.38562e-05	6.94049e-05	4.64039e-05	7.44735e-05	6.17431e-05	5.73852e-05	5.68405e-05	5.82344e-05	4.77639e-05	4.58066e-05	5.21328e-05	5.15659e-05
Neuron_229	0.000198141	0.000163098	0.000153975	0.000114646	8.96262e-05	8.26317e-05	7.56667e-05	6.35036e-05	5.2301e-05	5.40921e-05	4.92928e-05	4.49153e-05	4.3328e-05	5.14236e-05	5.04499e-05	4.47363e-05	3.97293e-05	3.36395e-05	3.75544e-05	4.00642e-05	4.02538e-05	3.861e-05	3.46243e-05	3.16473e-05	3.80272e-05	3.35361e-05	3.30185e-05	2.85421e-05	3.18487e-05	2.80208e-05	3.30469e-05	3.31032e-05	2.83259e-05	2.63838e-05	2.21366e-05	2.64141e-05	2.71827e-05	2.774e-05	3.03224e-05	2.05833e-05	3.33784e-05	2.67187e-05	2.62424e-05	2.69524e-05	2.66057e-05	2.17993e-05	2.18103e-05	2.4033e-05	2.15852e-05
Neuron_230	0.000114659	9.56813e-05	9.17732e-05	7.50604e-05	6.33016e-05	5.62945e-05	4.98723e-05	5.02067e-05	4.08267e-05	3.67791e-05	4.46088e-05	3.96521e-05	3.37607e-05	3.4484e-05	3.7113e-05	3.89517e-05	3.41271e-05	3.46381e-05	3.48513e-05	3.47067e-05	2.85859e-05	2.92222e-05	2.94511e-05	2.79119e-05	3.66017e-05	3.1828e-05	3.56375e-05	2.94753e-05	2.90316e-05	2.62971e-05	2.469e-05	2.88913e-05	2.86187e-05	2.55393e-05	2.92106e-05	2.79601e-05	2.41337e-05	2.14162e-05	2.58991e-05	2.42318e-05	2.69773e-05	2.61112e-05	2.66458e-05	2.04784e-05	2.23945e-05	2.21008e-05	1.92168e-05	2.27292e-05	2.24518e-05
Neuron_231	0.000153922	0.000162718	0.000144134	0.000109967	8.60096e-05	8.28649e-05	7.10066e-05	6.54106e-05	6.09282e-05	5.81325e-05	6.38271e-05	5.58738e-05	4.94362e-05	5.95413e-05	7.11326e-05	5.31247e-05	5.04829e-05	4.23263e-05	4.86598e-05	4.81766e-05	4.45155e-05	4.52568e-05	4.41889e-05	4.15093e-05	4.37401e-05	3.81511e-05	4.01481e-05	3.78156e-05	4.14999e-05	3.60677e-05	4.43854e-05	4.48649e-05	3.68225e-05	3.84115e-05	3.23185e-05	3.49761e-05	3.33294e-05	3.41144e-05	3.67074e-05	2.84245e-05	4.26389e-05	3.75692e-05	3.36459e-05	2.92566e-05	3.08172e-05	3.14688e-05	2.67104e-05	3.11247e-05	3.01348e-05
Neuron_232	0.000290711	0.000254986	0.000226964	0.000187821	0.000162273	0.000139439	0.000123677	0.000122263	0.00010303	9.16547e-05	0.000108765	9.77768e-05	8.80355e-05	9.21772e-05	0.000100363	9.29996e-05	8.91163e-05	8.26907e-05	8.7179e-05	8.70647e-05	7.20399e-05	7.81291e-05	7.80144e-05	7.28467e-05	8.90822e-05	7.71546e-05	8.73623e-05	6.96329e-05	7.36859e-05	6.9782e-05	6.6733e-05	7.26783e-05	7.47193e-05	6.54795e-05	7.22603e-05	7.19194e-05	6.17177e-05	5.65046e-05	6.66043e-05	6.04033e-05	7.09525e-05	6.31717e-05	6.70424e-05	5.4757e-05	5.90926e-05	5.80183e-05	4.84367e-05	5.79411e-05	5.61118e-05
Neuron_233	0.000229731	0.000223964	0.000207817	0.000159698	0.000131852	0.00011949	0.00010114	9.32195e-05	9.03504e-05	7.77991e-05	9.22651e-05	8.23805e-05	7.57244e-05	8.59046e-05	0.000105769	7.87295e-05	7.63064e-05	6.15182e-05	7.33985e-05	7.55056e-05	6.5776e-05	6.81226e-05	6.94057e-05	6.31901e-05	6.40474e-05	6.08498e-05	6.37355e-05	5.74786e-05	6.21016e-05	5.87398e-05	6.60448e-05	6.73198e-05	6.02288e-05	6.02498e-05	5.61567e-05	5.44068e-05	5.37663e-05	5.24053e-05	5.41572e-05	4.66455e-05	6.37053e-05	5.4544e-05	4.92232e-05	4.2989e-05	4.75825e-05	5.2127e-05	3.81466e-05	4.55977e-05	4.46542e-05
Neuron_234	0.00019854	0.000208742	0.000183919	0.000143268	0.000122635	0.000105389	8.95876e-05	8.94366e-05	7.96239e-05	6.97375e-05	8.1721e-05	7.04257e-05	6.51223e-05	6.85035e-05	8.05095e-05	6.92018e-05	6.6457e-05	5.68862e-05	6.21262e-05	6.25633e-05	5.25156e-05	5.78499e-05	5.79213e-05	5.55901e-05	5.89128e-05	5.71814e-05	5.94174e-05	4.91359e-05	5.45413e-05	5.21812e-05	5.21704e-05	5.72887e-05	5.48377e-05	5.09433e-05	5.13122e-05	4.97756e-05	4.73365e-05	4.21303e-05	4.69232e-05	4.30791e-05	5.26741e-05	4.91869e-05	4.72781e-05	3.72911e-05	4.07352e-05	4.29131e-05	3.57965e-05	4.08299e-05	3.99001e-05
Neuron_235	0.000178546	0.000147474	0.000147232	0.00011601	0.000105014	8.97316e-05	8.00188e-05	7.54974e-05	6.34515e-05	6.16494e-05	6.63484e-05	5.77471e-05	5.67492e-05	6.19395e-05	6.50731e-05	5.65459e-05	5.47914e-05	4.7275e-05	5.06575e-05	5.41913e-05	4.85646e-05	5.06921e-05	4.83415e-05	4.61047e-05	4.91267e-05	4.84911e-05	5.00745e-05	4.13566e-05	4.62956e-05	4.47938e-05	4.37697e-05	4.90273e-05	4.71505e-05	4.25864e-05	4.1955e-05	4.19139e-05	4.12999e-05	3.76171e-05	4.18201e-05	3.70337e-05	4.49151e-05	3.90734e-05	4.05732e-05	3.46318e-05	3.64696e-05	3.63865e-05	3.05577e-05	3.28719e-05	3.3226e-05
Neuron_236	0.000183752	0.000186531	0.000162765	0.000113589	9.89316e-05	8.76371e-05	7.70091e-05	7.33916e-05	6.03129e-05	6.22531e-05	5.90911e-05	5.59116e-05	5.37908e-05	5.64622e-05	5.38689e-05	5.31003e-05	4.96134e-05	4.6351e-05	4.80608e-05	5.14212e-05	4.86861e-05	4.81657e-05	4.27292e-05	4.21921e-05	4.30665e-05	4.59384e-05	4.61444e-05	3.65787e-05	4.24426e-05	4.28684e-05	3.81338e-05	4.36301e-05	4.04236e-05	3.59194e-05	3.62163e-05	4.10167e-05	3.49579e-05	3.41802e-05	4.01542e-05	3.50997e-05	4.11771e-05	3.95621e-05	3.73356e-05	3.40375e-05	3.45134e-05	3.01024e-05	2.9598e-05	2.93132e-05	2.83438e-05
Neuron_237	0.000118426	0.000104056	9.47028e-05	7.42705e-05	7.02628e-05	6.15391e-05	5.46476e-05	5.14009e-05	4.45397e-05	4.42302e-05	4.54893e-05	3.8843e-05	3.57801e-05	3.78859e-05	4.06031e-05	4.10688e-05	3.60791e-05	3.52078e-05	3.43088e-05	3.61434e-05	3.29236e-05	3.57747e-05	3.05891e-05	3.07833e-05	3.65098e-05	3.21844e-05	3.59411e-05	2.84079e-05	3.04951e-05	3.03078e-05	2.78194e-05	3.53579e-05	3.26466e-05	2.96075e-05	2.97088e-05	2.91331e-05	2.78921e-05	2.55416e-05	2.57811e-05	2.72058e-05	2.92656e-05	3.11941e-05	2.99061e-05	2.35195e-05	2.38313e-05	2.42554e-05	2.27278e-05	2.35014e-05	2.2624e-05
Neuron_238	0.000179563	0.000182942	0.000159823	0.0001102	8.4173e-05	7.48002e-05	6.33038e-05	6.06758e-05	5.04305e-05	5.03031e-05	4.84797e-05	4.60414e-05	3.92996e-05	4.56816e-05	4.99318e-05	4.29583e-05	3.86203e-05	3.56382e-05	3.92132e-05	3.79595e-05	3.68566e-05	3.6111e-05	3.32651e-05	3.16012e-05	3.89764e-05	3.10614e-05	3.46285e-05	3.10117e-05	3.09881e-05	2.95569e-05	3.14554e-05	3.3648e-05	3.00945e-05	2.57428e-05	2.54618e-05	2.73308e-05	2.6871e-05	2.32293e-05	3.11312e-05	2.39932e-05	3.37076e-05	3.04275e-05	2.75038e-05	2.60584e-05	2.6228e-05	2.10631e-05	2.15783e-05	2.32604e-05	2.42208e-05
Neuron_239	0.000327477	0.000310281	0.000268302	0.000193257	0.000153565	0.000141594	0.000115885	0.000111982	9.6047e-05	9.61875e-05	9.76526e-05	8.67528e-05	7.31777e-05	8.23077e-05	8.97854e-05	8.82463e-05	7.71069e-05	7.50147e-05	7.52389e-05	7.65403e-05	6.82584e-05	7.04011e-05	6.24604e-05	6.41785e-05	7.75001e-05	6.47753e-05	7.21751e-05	6.03103e-05	6.21209e-05	5.66154e-05	5.76854e-05	6.38872e-05	5.516e-05	5.52405e-05	5.4622e-05	5.75371e-05	5.28783e-05	5.19966e-05	5.64665e-05	5.34083e-05	5.82381e-05	6.27071e-05	5.5912e-05	4.73069e-05	5.13721e-05	4.43013e-05	4.5338e-05	5.07203e-05	4.43113e-05
Neuron_240	0.000312215	0.000296674	0.000269277	0.0001691	0.00013216	0.000121259	0.000109281	0.000100612	8.23618e-05	8.93962e-05	8.39211e-05	7.96063e-05	6.71179e-05	8.63092e-05	9.18766e-05	6.86706e-05	7.06509e-05	6.29961e-05	6.82259e-05	6.7755e-05	6.86932e-05	7.27172e-05	5.87167e-05	5.63958e-05	6.13823e-05	5.05119e-05	5.73677e-05	5.70847e-05	5.58044e-05	5.16688e-05	5.68752e-05	5.6921e-05	5.24882e-05	4.55163e-05	3.55547e-05	5.10445e-05	5.09968e-05	4.68739e-05	5.77763e-05	4.25588e-05	5.91093e-05	4.52737e-05	4.82917e-05	5.25085e-05	5.17681e-05	3.68271e-05	3.84754e-05	4.13326e-05	3.77941e-05
Neuron_241	0.000222183	0.000155551	0.000143839	0.00011746	0.000104416	0.000102557	8.33865e-05	8.1146e-05	6.86757e-05	7.45264e-05	6.91917e-05	6.39604e-05	5.43494e-05	5.99192e-05	6.12304e-05	6.53387e-05	6.28568e-05	5.8761e-05	5.63637e-05	5.56337e-05	5.19194e-05	5.26446e-05	4.69224e-05	5.18841e-05	5.96887e-05	5.26897e-05	5.71616e-05	4.5426e-05	5.25398e-05	4.92845e-05	4.40329e-05	5.69792e-05	4.45814e-05	4.31964e-05	4.82503e-05	4.91834e-05	4.11583e-05	3.99025e-05	4.37753e-05	4.25063e-05	4.60233e-05	5.41885e-05	4.83043e-05	3.76087e-05	4.06495e-05	3.60254e-05	3.84696e-05	3.82583e-05	3.64805e-05
Neuron_242	0.000239107	0.000233259	0.000193165	0.000129916	0.00010589	9.61995e-05	8.13671e-05	8.02276e-05	6.3807e-05	6.334e-05	6.39481e-05	5.64634e-05	5.19353e-05	5.62119e-05	6.53542e-05	5.57948e-05	4.98243e-05	4.57001e-05	4.81219e-05	5.23973e-05	4.60515e-05	5.06292e-05	4.48755e-05	4.2117e-05	4.52383e-05	3.82176e-05	4.7128e-05	4.22752e-05	4.04959e-05	4.17656e-05	4.13568e-05	4.36353e-05	4.36595e-05	3.77659e-05	3.58926e-05	3.68087e-05	3.78993e-05	3.32048e-05	3.75744e-05	3.46181e-05	4.08786e-05	3.31037e-05	3.58746e-05	3.26384e-05	3.30688e-05	3.12272e-05	2.70562e-05	2.86677e-05	2.91851e-05
Neuron_243	0.000217464	0.00018884	0.000181213	0.000148763	0.000117248	0.000100748	8.84227e-05	8.40182e-05	7.17931e-05	6.4883e-05	7.17936e-05	6.26791e-05	5.28992e-05	5.85275e-05	5.95002e-05	5.89279e-05	5.45298e-05	5.07395e-05	5.41776e-05	5.13869e-05	4.52346e-05	4.82561e-05	4.4337e-05	4.22989e-05	5.90046e-05	4.69259e-05	5.52598e-05	4.10165e-05	4.40167e-05	4.16871e-05	4.29059e-05	4.60584e-05	4.095e-05	3.66818e-05	3.9731e-05	4.36835e-05	3.73336e-05	3.6842e-05	4.30651e-05	3.19458e-05	4.43785e-05	4.20718e-05	4.10258e-05	3.44789e-05	3.75768e-05	3.15259e-05	3.00164e-05	3.83449e-05	3.48309e-05
Neuron_244	0.000144064	0.000115518	0.000111805	9.03681e-05	8.29702e-05	6.92255e-05	5.72698e-05	5.6673e-05	5.00634e-05	4.71955e-05	5.26764e-05	4.44962e-05	4.32749e-05	4.48186e-05	5.16726e-05	4.38984e-05	4.33846e-05	3.61749e-05	3.8749e-05	4.20929e-05	3.51191e-05	3.92888e-05	3.82141e-05	3.6946e-05	3.83093e-05	3.62357e-05	3.97516e-05	3.07444e-05	3.60224e-05	3.46766e-05	3.47052e-05	3.90107e-05	3.90086e-05	3.65697e-05	3.47508e-05	3.31231e-05	3.29565e-05	2.93373e-05	2.94827e-05	3.16367e-05	3.41435e-05	3.19566e-05	3.29713e-05	2.51366e-05	2.68965e-05	3.12673e-05	2.45508e-05	2.66367e-05	2.61852e-05
Neuron_245	0.000182391	0.000144567	0.000124738	9.96719e-05	8.13582e-05	6.99271e-05	6.17697e-05	5.64978e-05	4.57152e-05	4.50119e-05	3.96817e-05	3.94829e-05	4.07276e-05	4.27795e-05	3.56095e-05	3.94329e-05	3.36364e-05	3.20943e-05	3.31225e-05	3.61071e-05	3.47443e-05	3.26998e-05	3.07517e-05	2.9245e-05	3.43381e-05	3.55667e-05	3.44626e-05	2.39952e-05	2.88565e-05	3.001e-05	2.5282e-05	3.22005e-05	2.74898e-05	2.23268e-05	2.48152e-05	2.89077e-05	2.31297e-05	2.34723e-05	2.61302e-05	2.31973e-05	2.74802e-05	2.52624e-05	2.76635e-05	2.33852e-05	2.37154e-05	1.97612e-05	2.02656e-05	2.17164e-05	1.95324e-05
Neuron_246	0.000195051	0.00019482	0.000172328	0.000119603	9.67266e-05	8.40559e-05	7.19467e-05	7.03543e-05	5.87001e-05	5.60151e-05	5.86044e-05	5.51284e-05	4.82391e-05	5.51553e-05	5.63085e-05	4.8645e-05	4.64018e-05	4.545e-05	4.76689e-05	4.70659e-05	4.55858e-05	4.70135e-05	3.94895e-05	3.72703e-05	4.36841e-05	4.17347e-05	4.23837e-05	3.78916e-05	3.94563e-05	3.97439e-05	3.44093e-05	4.02448e-05	3.66937e-05	3.21805e-05	3.23421e-05	3.90673e-05	3.4703e-05	3.08324e-05	4.23215e-05	2.99861e-05	3.96426e-05	3.55984e-05	3.29659e-05	3.32862e-05	3.52075e-05	2.58935e-05	2.68664e-05	2.82104e-05	2.82694e-05
Neuron_247	0.000320503	0.00028423	0.000254652	0.000194835	0.000169957	0.000149489	0.000121894	0.000116743	0.00010656	0.000104639	0.000102371	9.20397e-05	8.44336e-05	8.68636e-05	9.30976e-05	9.21775e-05	7.941e-05	7.83215e-05	7.84822e-05	8.12098e-05	7.88927e-05	8.06433e-05	6.89885e-05	7.25888e-05	7.61134e-05	7.62239e-05	8.06779e-05	6.12425e-05	6.92782e-05	7.01664e-05	6.10809e-05	8.14848e-05	7.02989e-05	6.50857e-05	6.3624e-05	6.31668e-05	5.94815e-05	5.24185e-05	5.73067e-05	6.53101e-05	6.57352e-05	7.31926e-05	6.89061e-05	5.19678e-05	4.89643e-05	5.22557e-05	4.90972e-05	4.91976e-05	4.6709e-05
Neuron_248	0.000178312	0.000166611	0.000141399	0.000104596	8.45201e-05	7.16482e-05	6.36131e-05	5.98671e-05	5.06704e-05	4.82014e-05	4.593e-05	4.04419e-05	3.93385e-05	4.14414e-05	3.90641e-05	4.04361e-05	3.54265e-05	3.42993e-05	3.4443e-05	3.63229e-05	3.33031e-05	3.54644e-05	3.11413e-05	2.989e-05	3.59607e-05	3.39576e-05	3.51177e-05	2.53281e-05	2.97647e-05	3.10621e-05	2.80318e-05	3.24573e-05	2.98717e-05	2.57282e-05	2.708e-05	2.67848e-05	2.58192e-05	2.38802e-05	2.60892e-05	2.43381e-05	2.9164e-05	3.07566e-05	2.94043e-05	2.34828e-05	2.37529e-05	2.15122e-05	2.25321e-05	2.31971e-05	2.2051e-05
Neuron_249	0.000197544	0.000175247	0.000155946	0.000125122	0.00011436	0.000108731	9.2636e-05	8.95002e-05	7.49537e-05	7.80045e-05	8.02444e-05	7.262e-05	6.14952e-05	6.75876e-05	6.61585e-05	7.28872e-05	7.04428e-05	6.77336e-05	6.49323e-05	6.51237e-05	5.85162e-05	6.16869e-05	5.34297e-05	5.69702e-05	7.31975e-05	5.87683e-05	6.6909e-05	5.06175e-05	5.911e-05	5.22729e-05	4.83499e-05	5.83837e-05	5.19258e-05	5.03604e-05	5.2127e-05	5.62361e-05	4.65485e-05	4.52006e-05	5.19199e-05	4.87665e-05	5.26964e-05	5.86372e-05	5.57428e-05	4.49197e-05	4.81383e-05	4.15501e-05	4.38079e-05	4.41912e-05	4.17127e-05
Neuron_250	0.000308285	0.000262289	0.000253602	0.000173207	0.000137748	0.000125162	0.000113064	0.000108301	9.13831e-05	8.47672e-05	9.21481e-05	8.50063e-05	7.12242e-05	7.59258e-05	8.53853e-05	7.82814e-05	6.9852e-05	7.08857e-05	7.31617e-05	7.54452e-05	6.64721e-05	7.07448e-05	6.23334e-05	5.91486e-05	7.06659e-05	5.9695e-05	7.41065e-05	6.1192e-05	5.99478e-05	5.78334e-05	5.70134e-05	5.98962e-05	6.30704e-05	5.59146e-05	5.5965e-05	5.30391e-05	5.34226e-05	4.40396e-05	5.52423e-05	5.12205e-05	6.10546e-05	5.686e-05	5.67084e-05	4.80453e-05	4.83978e-05	4.6463e-05	4.03753e-05	4.52136e-05	4.3885e-05
Neuron_251	0.000232277	0.00020146	0.000184591	0.000136417	0.000113366	0.000100461	8.81215e-05	8.14389e-05	6.857e-05	6.47769e-05	6.63196e-05	6.60765e-05	5.62022e-05	6.45267e-05	6.74011e-05	5.77542e-05	5.71014e-05	5.21561e-05	5.60807e-05	5.21698e-05	5.13102e-05	5.54972e-05	4.63825e-05	4.70187e-05	5.53806e-05	4.68022e-05	4.99324e-05	4.34385e-05	4.64389e-05	4.478e-05	4.44579e-05	4.80881e-05	4.12424e-05	3.72589e-05	3.89355e-05	4.43774e-05	3.81922e-05	3.86443e-05	4.48801e-05	3.56336e-05	4.35491e-05	3.79973e-05	4.01147e-05	3.90457e-05	4.10678e-05	3.27423e-05	3.08738e-05	3.75959e-05	3.28336e-05
Neuron_252	0.000203413	0.000172965	0.000166627	0.000149576	0.000141426	0.000127616	0.000111845	0.000105655	9.17379e-05	9.22942e-05	9.49929e-05	8.33295e-05	7.54354e-05	8.03257e-05	7.93939e-05	8.54112e-05	8.10908e-05	7.72965e-05	7.38732e-05	7.46835e-05	6.69576e-05	7.26496e-05	6.19401e-05	6.38277e-05	7.95541e-05	7.02272e-05	7.84456e-05	5.80102e-05	6.89879e-05	6.40799e-05	5.6391e-05	7.33858e-05	6.64928e-05	6.08605e-05	6.38694e-05	6.26694e-05	5.75133e-05	5.23446e-05	5.59353e-05	5.57776e-05	6.22228e-05	7.03022e-05	6.65623e-05	4.86347e-05	5.16725e-05	5.02769e-05	5.08001e-05	4.9586e-05	4.80349e-05
Neuron_253	0.000167312	0.00013519	0.000137603	9.49935e-05	7.7986e-05	6.98046e-05	5.84168e-05	5.41405e-05	4.13366e-05	4.29397e-05	4.61439e-05	3.97214e-05	3.76639e-05	4.12642e-05	4.29038e-05	3.81262e-05	3.57395e-05	3.3885e-05	3.35658e-05	3.45302e-05	3.58047e-05	3.67688e-05	2.71994e-05	2.86138e-05	3.17286e-05	2.75508e-05	3.37801e-05	2.95553e-05	2.93724e-05	2.83899e-05	2.86063e-05	3.03691e-05	2.89387e-05	2.43963e-05	2.23395e-05	2.78706e-05	2.74652e-05	2.62382e-05	2.91882e-05	2.36986e-05	2.80849e-05	2.18086e-05	2.50301e-05	2.61303e-05	2.74778e-05	2.03969e-05	2.06969e-05	2.13627e-05	1.98312e-05
Neuron_254	0.000181091	0.000116746	0.000107931	7.7018e-05	6.24313e-05	5.66772e-05	4.64621e-05	4.76342e-05	3.6275e-05	3.67219e-05	3.6568e-05	3.25802e-05	2.94532e-05	3.34642e-05	3.70961e-05	3.33594e-05	3.01825e-05	2.86766e-05	2.82649e-05	3.06088e-05	2.90072e-05	2.90327e-05	2.57235e-05	2.65586e-05	2.74137e-05	2.69062e-05	2.73736e-05	2.55318e-05	2.54868e-05	2.6139e-05	2.21525e-05	2.80869e-05	2.41124e-05	2.03429e-05	2.24652e-05	2.52767e-05	2.26689e-05	2.16458e-05	2.44694e-05	2.16832e-05	2.28901e-05	1.87126e-05	2.13388e-05	2.01965e-05	2.26175e-05	1.77606e-05	1.72014e-05	1.97296e-05	1.71725e-05
Neuron_255	0.000260111	0.000256179	0.000242999	0.000159187	0.000124836	0.000115325	0.000103864	0.000100396	8.04332e-05	7.81586e-05	8.67721e-05	7.58476e-05	6.7352e-05	6.95865e-05	7.97826e-05	7.35566e-05	6.74539e-05	6.49464e-05	6.54998e-05	6.89153e-05	5.84509e-05	6.2868e-05	5.74318e-05	5.37474e-05	6.65487e-05	5.43564e-05	6.83043e-05	5.78547e-05	5.71768e-05	5.12786e-05	5.27544e-05	5.58568e-05	5.72232e-05	5.04592e-05	5.36938e-05	4.97339e-05	4.89554e-05	4.22235e-05	5.0957e-05	4.67832e-05	5.58486e-05	5.05683e-05	5.10054e-05	4.34046e-05	4.54954e-05	4.36563e-05	3.79056e-05	4.17389e-05	4.17792e-05
Neuron_256	0.000802324	0.000789455	0.000641558	0.000433227	0.000383989	0.000350406	0.000295558	0.000286235	0.000223382	0.000232499	0.00022477	0.000209276	0.000190887	0.000208337	0.000219792	0.000218128	0.00020394	0.000175252	0.000180196	0.000180868	0.000180153	0.000187459	0.000160298	0.000165669	0.000191168	0.000169404	0.000171594	0.000134821	0.000166384	0.00015383	0.000142018	0.000181329	0.000141639	0.000127088	0.00013215	0.00015669	0.000131069	0.000127473	0.00015178	0.000128425	0.000144019	0.000151169	0.000138381	0.000133032	0.000136572	0.000104568	0.000116059	0.000118029	0.000118175
Neuron_257	0.000556651	0.000557883	0.000471448	0.000360976	0.000281022	0.000262346	0.000231943	0.000209946	0.000176229	0.000159757	0.00017751	0.000151283	0.000141112	0.00015398	0.00016569	0.000163241	0.000134651	0.000119521	0.00013156	0.00013767	0.000119973	0.000119641	0.000114042	0.000103806	0.000141772	0.000119875	0.000130586	9.98633e-05	0.000109933	9.95823e-05	0.000111819	0.000117735	9.97394e-05	9.64599e-05	9.65681e-05	9.90949e-05	9.55969e-05	9.46682e-05	0.000101288	7.61002e-05	0.000111066	0.000101252	9.43063e-05	8.13732e-05	9.03188e-05	8.08933e-05	7.283e-05	9.30518e-05	8.3235e-05
Neuron_258	0.000343559	0.000332057	0.000264769	0.000200223	0.00017499	0.000153278	0.00013352	0.000118627	9.78091e-05	9.96998e-05	8.22553e-05	7.57279e-05	8.01729e-05	8.53142e-05	7.69876e-05	8.44608e-05	6.85399e-05	6.20528e-05	6.35783e-05	6.95917e-05	6.93532e-05	6.75753e-05	6.1111e-05	5.77536e-05	7.50218e-05	7.03365e-05	6.75981e-05	4.46363e-05	5.68315e-05	5.95395e-05	5.26729e-05	7.14401e-05	5.7599e-05	4.56336e-05	5.0341e-05	5.56906e-05	5.05424e-05	4.63792e-05	5.10034e-05	4.48862e-05	5.63399e-05	5.77859e-05	5.60206e-05	4.64122e-05	4.65659e-05	3.82637e-05	4.33473e-05	4.49051e-05	4.33913e-05
Neuron_259	0.000738475	0.000610061	0.000548155	0.000433152	0.000395571	0.000375652	0.000324967	0.000310244	0.000255259	0.000270695	0.000263764	0.000249184	0.000215096	0.000249381	0.00023483	0.000244617	0.000242764	0.000227606	0.0002227	0.000221972	0.000206541	0.000219181	0.000186681	0.000194245	0.000244444	0.000201118	0.000215158	0.000172994	0.000201091	0.000180493	0.000167167	0.000200673	0.000172104	0.000164977	0.000169346	0.000192845	0.000156961	0.000159545	0.000183178	0.000161719	0.000178687	0.000193549	0.000186963	0.000161521	0.000170795	0.000137964	0.00014878	0.000150993	0.000142447
Neuron_260	0.000348273	0.000331028	0.000292792	0.000222059	0.000184176	0.000152411	0.000133702	0.000116923	0.000100524	9.42515e-05	9.44121e-05	7.98379e-05	8.29198e-05	8.50026e-05	9.46767e-05	8.88786e-05	7.12177e-05	6.22545e-05	6.85941e-05	7.72204e-05	6.85986e-05	6.9094e-05	6.42081e-05	6.18679e-05	7.01328e-05	6.74966e-05	7.10732e-05	5.38038e-05	5.6053e-05	5.87758e-05	5.90915e-05	6.9305e-05	6.60731e-05	5.82586e-05	5.52689e-05	5.40168e-05	5.94621e-05	5.45205e-05	5.07633e-05	5.15427e-05	5.63867e-05	4.71875e-05	4.98271e-05	4.34571e-05	4.65361e-05	4.90931e-05	3.99873e-05	4.77925e-05	4.33758e-05
Neuron_261	0.00044727	0.000354904	0.000348918	0.000253904	0.000211051	0.000172013	0.000153972	0.000146436	0.000118478	0.000121017	0.000120135	0.000103836	0.000100031	9.92912e-05	0.000105263	0.000105903	9.29156e-05	8.62409e-05	8.66954e-05	0.000100746	8.67681e-05	9.37191e-05	8.15231e-05	7.87401e-05	8.74022e-05	7.81857e-05	9.62627e-05	7.14526e-05	7.84408e-05	7.79513e-05	7.58137e-05	8.55116e-05	8.4325e-05	7.54974e-05	7.45413e-05	7.18922e-05	7.06178e-05	6.43305e-05	6.27482e-05	6.97593e-05	7.3365e-05	7.30587e-05	7.56317e-05	6.06215e-05	5.8175e-05	6.43855e-05	5.36795e-05	5.79614e-05	5.62124e-05
Neuron_262	0.000589191	0.000531641	0.000478833	0.000369997	0.000306669	0.00027886	0.000235349	0.000221635	0.000205496	0.000177908	0.000206781	0.00017874	0.000155061	0.000171429	0.000193824	0.000171551	0.000161448	0.000147158	0.000159819	0.000155387	0.000140015	0.000153338	0.000138766	0.000135483	0.000159461	0.00014334	0.000153771	0.000127239	0.000132208	0.000131558	0.000127533	0.000149512	0.000135144	0.000123379	0.000129178	0.000126881	0.000121973	0.000103648	0.000126683	0.000100437	0.000137948	0.00012621	0.000120213	0.00010181	0.000105736	0.000100044	9.03146e-05	0.000104519	0.000102095
Neuron_263	0.000610542	0.000625418	0.000495581	0.000394842	0.000343505	0.000321459	0.000268312	0.000258975	0.000229422	0.000237349	0.000230002	0.000205905	0.000193452	0.000202442	0.000215897	0.000204241	0.000192846	0.00017131	0.000177601	0.000181337	0.000171145	0.000164383	0.000157538	0.000162716	0.000171619	0.000170117	0.000173106	0.000130373	0.000159764	0.00015611	0.000160856	0.000172756	0.000144216	0.000137725	0.000133889	0.000152198	0.000126122	0.000133778	0.00013452	0.00012605	0.000154086	0.000166343	0.000147215	0.000113527	0.000115467	0.000115721	0.000117177	0.000122997	0.000113058
Neuron_264	0.000437002	0.000415584	0.000387547	0.0002673	0.000222261	0.000181086	0.00016215	0.000146938	0.000126573	0.000121402	0.000120404	0.000113046	9.98724e-05	0.000119317	0.000125481	0.000101014	9.95289e-05	8.5992e-05	9.81613e-05	0.000101223	9.40882e-05	0.000104089	8.99935e-05	8.33409e-05	9.031e-05	7.83117e-05	8.89158e-05	7.51255e-05	7.76331e-05	8.17073e-05	8.06032e-05	8.12925e-05	8.32665e-05	7.02822e-05	6.48456e-05	7.69129e-05	7.53913e-05	7.00564e-05	7.88037e-05	6.10591e-05	8.05916e-05	6.13119e-05	6.64013e-05	7.10749e-05	7.25603e-05	6.00281e-05	5.02926e-05	6.31508e-05	5.53983e-05
Neuron_265	0.000820186	0.000846198	0.000789395	0.000559658	0.000482418	0.00042187	0.000369223	0.000354295	0.000314138	0.000282245	0.00033601	0.000303933	0.000270404	0.000313385	0.000376449	0.00027383	0.000280642	0.000239852	0.000272489	0.000272663	0.000244168	0.000260583	0.000247641	0.000228629	0.00023042	0.000228433	0.000230088	0.000226422	0.000233871	0.00022055	0.000218356	0.000238892	0.000225387	0.000209606	0.000199282	0.00020794	0.00021096	0.000188711	0.000221251	0.000176609	0.000236246	0.000188467	0.000180112	0.000176147	0.000196746	0.000181696	0.000146787	0.000159762	0.000159628
Neuron_266	0.000510938	0.000457888	0.000431746	0.000315668	0.000284434	0.000244192	0.000234135	0.000215471	0.000182358	0.000183349	0.000183616	0.000165781	0.000146022	0.00016087	0.000153105	0.000161307	0.000149784	0.000142262	0.000145374	0.000150727	0.000138644	0.000147897	0.00012264	0.000122104	0.000148406	0.00013083	0.000150308	0.000112818	0.000123511	0.000122835	0.000118555	0.000130378	0.00012808	0.000111817	0.000112008	0.000120146	0.000112242	0.000103686	0.000113919	0.000100862	0.000121316	0.000120141	0.000120182	0.00010364	0.000103145	9.24759e-05	8.94372e-05	9.96217e-05	8.89111e-05
Neuron_267	0.000329478	0.00027478	0.000255003	0.000189261	0.000157447	0.000135809	0.00011178	0.000105081	8.84978e-05	8.71338e-05	8.59505e-05	8.01905e-05	6.91174e-05	8.32828e-05	8.47878e-05	7.0025e-05	7.15345e-05	6.55044e-05	6.85519e-05	6.7459e-05	6.85201e-05	7.21515e-05	5.90137e-05	5.77829e-05	6.51956e-05	5.53353e-05	6.65063e-05	5.53404e-05	5.81553e-05	5.57558e-05	5.58238e-05	6.01042e-05	5.98158e-05	4.76659e-05	4.38807e-05	5.4779e-05	5.32873e-05	4.72428e-05	5.86192e-05	4.62572e-05	5.63656e-05	4.67789e-05	5.0505e-05	5.06641e-05	5.26012e-05	3.92274e-05	3.91549e-05	4.26459e-05	4.04044e-05
Neuron_268	0.000340647	0.000317162	0.000283136	0.00022758	0.000184882	0.000163197	0.000154336	0.000128145	0.000110502	0.000114841	0.000105176	9.69937e-05	9.99259e-05	0.00011053	0.000108566	9.5148e-05	9.01456e-05	6.9598e-05	8.11218e-05	8.6715e-05	8.28054e-05	7.98444e-05	7.73839e-05	6.97795e-05	8.35837e-05	7.48823e-05	7.53786e-05	5.19918e-05	7.16653e-05	6.59446e-05	8.036e-05	7.38344e-05	6.3874e-05	5.9587e-05	5.16522e-05	6.54552e-05	5.55695e-05	6.48694e-05	6.41232e-05	4.32211e-05	7.19646e-05	6.26463e-05	6.33759e-05	5.5696e-05	5.45483e-05	5.23922e-05	4.97529e-05	5.76199e-05	5.33904e-05
Neuron_269	0.000576378	0.000481551	0.000449947	0.000317819	0.000273967	0.000226075	0.000197011	0.000190601	0.000155968	0.000150007	0.000161937	0.000140763	0.000131884	0.000137191	0.000151373	0.000149035	0.000125245	0.00012079	0.000121219	0.000138726	0.000116154	0.00012054	0.000111402	0.000107161	0.000120461	0.000111282	0.000130525	0.000103868	0.000103642	0.000101567	9.50962e-05	0.000107561	0.000109221	9.69555e-05	0.000100255	0.000105215	9.58889e-05	9.1206e-05	9.64189e-05	9.67684e-05	9.63004e-05	8.65048e-05	9.6559e-05	8.02567e-05	8.80368e-05	8.3744e-05	7.07667e-05	8.58677e-05	7.12118e-05
Neuron_270	0.000450038	0.000414743	0.000381954	0.000257887	0.000198056	0.00018371	0.000156309	0.000145816	0.00013152	0.000116204	0.000133623	0.000123965	9.80623e-05	0.000118193	0.000136423	0.000111605	0.000102253	9.73163e-05	0.000110337	0.000105353	9.68835e-05	0.000103627	8.82185e-05	8.24383e-05	0.000101548	8.58751e-05	9.58675e-05	8.87327e-05	8.43846e-05	8.18535e-05	8.38735e-05	9.24075e-05	8.08484e-05	7.57014e-05	7.48341e-05	8.0765e-05	7.91584e-05	6.96138e-05	8.98387e-05	6.28849e-05	9.25891e-05	7.92557e-05	7.17663e-05	7.104e-05	7.62447e-05	6.18103e-05	5.57414e-05	6.74734e-05	6.33514e-05
Neuron_271	0.000319032	0.000287313	0.000263232	0.000196629	0.000166	0.00013503	0.000116089	0.000110933	9.36701e-05	8.32458e-05	9.5878e-05	8.57729e-05	7.80461e-05	8.07072e-05	9.88393e-05	8.88672e-05	7.48054e-05	7.08622e-05	7.41139e-05	7.87031e-05	6.73809e-05	6.92192e-05	6.56253e-05	6.67607e-05	7.10913e-05	6.75089e-05	7.49089e-05	6.32113e-05	6.14257e-05	6.08338e-05	5.80646e-05	6.7151e-05	6.32381e-05	5.64103e-05	5.95373e-05	5.94966e-05	5.62279e-05	5.32705e-05	5.64213e-05	5.55797e-05	5.80277e-05	5.11344e-05	5.36869e-05	4.53867e-05	5.11625e-05	4.933e-05	4.01245e-05	5.01117e-05	4.41041e-05
Neuron_272	0.000443671	0.00043216	0.000363811	0.00026659	0.000205389	0.000188452	0.000129811	0.000130527	0.00011829	9.90238e-05	0.000122851	9.87688e-05	9.23647e-05	9.57398e-05	0.000119358	9.18707e-05	8.41696e-05	7.60863e-05	8.54927e-05	8.54762e-05	7.63427e-05	8.12784e-05	7.79507e-05	7.55475e-05	7.71634e-05	7.3128e-05	8.19228e-05	6.50555e-05	6.75583e-05	7.4791e-05	7.15574e-05	8.13158e-05	7.26464e-05	6.84034e-05	6.55708e-05	6.74711e-05	6.23891e-05	5.59271e-05	6.60403e-05	5.6926e-05	7.10253e-05	5.94221e-05	5.89025e-05	4.84311e-05	5.40614e-05	5.62335e-05	4.4315e-05	5.33453e-05	5.30264e-05
Neuron_273	0.000387719	0.00032666	0.000324844	0.000234852	0.00018165	0.000167621	0.000149251	0.000129903	0.000111092	0.000113376	0.000113616	9.81472e-05	9.05303e-05	9.79758e-05	0.000103027	0.000100855	8.48855e-05	7.85102e-05	8.27325e-05	8.94157e-05	8.48299e-05	7.71742e-05	7.10389e-05	6.94092e-05	8.27963e-05	7.13796e-05	8.24978e-05	6.63665e-05	6.76417e-05	6.21725e-05	7.49501e-05	7.27687e-05	6.40972e-05	6.35614e-05	5.88243e-05	6.11059e-05	5.92179e-05	6.17775e-05	6.05753e-05	5.19289e-05	7.00643e-05	6.65637e-05	5.91134e-05	5.34482e-05	5.35249e-05	5.30383e-05	4.71911e-05	5.46522e-05	5.12589e-05
Neuron_274	0.000785798	0.000802025	0.000643823	0.000516705	0.000441751	0.000391731	0.000331495	0.000332276	0.000290668	0.000270887	0.000293896	0.000252852	0.000226999	0.000232843	0.000246917	0.000257353	0.000231821	0.000222976	0.000219283	0.000225955	0.000193378	0.000210805	0.000187489	0.000191441	0.000219946	0.000208161	0.000229708	0.000175123	0.000196233	0.000188013	0.000177892	0.000202645	0.00019138	0.000175428	0.000185014	0.00018308	0.000163012	0.000151778	0.000163432	0.000164231	0.000185169	0.000204623	0.000186225	0.000138638	0.000144701	0.000143249	0.000143141	0.000152621	0.000140264
Neuron_275	0.000796814	0.000676288	0.000677019	0.000544871	0.000503657	0.000472251	0.0003895	0.000391135	0.000325059	0.000336441	0.000364478	0.000319139	0.000274559	0.00030292	0.000292552	0.000314324	0.000322079	0.000311429	0.000285563	0.000280898	0.000248773	0.00027379	0.000223081	0.00025037	0.000309799	0.00026972	0.000295609	0.000242501	0.000278537	0.000242028	0.000204488	0.00027616	0.000236807	0.000222232	0.000245005	0.000257642	0.000216679	0.000205112	0.00023874	0.000223147	0.000232133	0.000267106	0.000256755	0.000193273	0.000223688	0.000182134	0.000201916	0.000186586	0.000179267
Neuron_276	0.000349198	0.000371509	0.000314425	0.000224309	0.000173396	0.000154709	0.000115633	0.000120483	9.97657e-05	8.65919e-05	9.66013e-05	8.73865e-05	8.09557e-05	8.62577e-05	0.000103805	8.54636e-05	8.11251e-05	6.87002e-05	7.39503e-05	6.87472e-05	7.05448e-05	7.06646e-05	6.33221e-05	6.36027e-05	6.54553e-05	6.69342e-05	6.62464e-05	6.32752e-05	6.75423e-05	6.56212e-05	6.30429e-05	7.56077e-05	5.64279e-05	4.94439e-05	5.25465e-05	6.18968e-05	5.70693e-05	5.44202e-05	6.40326e-05	4.80411e-05	5.9859e-05	5.08984e-05	5.07049e-05	4.7691e-05	5.58172e-05	4.26996e-05	4.21316e-05	4.78578e-05	4.52276e-05
Neuron_277	0.000623617	0.000561961	0.000509152	0.000391334	0.000326109	0.000282148	0.000243111	0.000212637	0.000178553	0.000165414	0.000171206	0.000146262	0.000143483	0.000152205	0.000158599	0.000164025	0.000126631	0.000117333	0.000125929	0.00013509	0.000124747	0.000122665	0.000104113	0.000104939	0.000131694	0.00011849	0.000123441	0.000100231	0.000100834	9.89685e-05	0.000105416	0.000123426	0.000107552	9.69937e-05	9.43709e-05	9.42672e-05	9.99524e-05	9.84052e-05	9.13243e-05	7.90375e-05	0.000104016	8.77165e-05	8.8334e-05	7.86976e-05	8.53663e-05	8.06263e-05	7.0937e-05	8.24226e-05	7.66659e-05
Neuron_278	0.00041248	0.00042137	0.000327457	0.000247433	0.000189247	0.000169998	0.000137519	0.000136202	0.000123445	0.000104817	0.000102072	9.58654e-05	8.77995e-05	0.000100891	0.000124872	0.000102976	8.29157e-05	7.12516e-05	8.24516e-05	8.43137e-05	7.94757e-05	7.8292e-05	8.10658e-05	7.75016e-05	8.00346e-05	7.72416e-05	7.87614e-05	6.21337e-05	6.67168e-05	7.05925e-05	6.96363e-05	8.58975e-05	6.79427e-05	5.75241e-05	5.82665e-05	6.39666e-05	5.97245e-05	5.47199e-05	6.40808e-05	5.5213e-05	6.98436e-05	6.09465e-05	5.65029e-05	4.9499e-05	5.4167e-05	4.84582e-05	4.18154e-05	5.78937e-05	5.10001e-05
Neuron_279	0.000580541	0.000572275	0.000490845	0.000362779	0.000290228	0.000255404	0.000218936	0.000205191	0.000197437	0.000167482	0.000187465	0.000172184	0.000152414	0.000174863	0.000207657	0.000167424	0.000154979	0.000132268	0.000151592	0.000159446	0.000137433	0.00014734	0.00014065	0.000130849	0.000140475	0.000123073	0.00013831	0.000115756	0.00012375	0.000117136	0.000128214	0.00012984	0.000123987	0.0001182	0.000112712	0.000109964	0.000109427	0.00010412	0.000113162	0.000100467	0.000124723	0.000105373	0.000102646	9.26646e-05	0.000102126	0.000101743	7.72794e-05	9.70302e-05	8.73768e-05
Neuron_280	0.000596686	0.000608282	0.000528684	0.000364252	0.000320021	0.00030929	0.000263323	0.00025458	0.000215148	0.000237024	0.000220833	0.000206484	0.00017626	0.000207424	0.000219313	0.000189529	0.000194053	0.000180633	0.000181614	0.00017897	0.000174109	0.000180289	0.000148849	0.000154966	0.000169353	0.00015717	0.000159256	0.000149964	0.000163214	0.000148642	0.000139954	0.000170157	0.000142704	0.000131509	0.000126963	0.000143654	0.000135831	0.000125452	0.000144303	0.000132732	0.000154443	0.000158528	0.000144496	0.000125613	0.000131448	0.000106536	0.000115852	0.00011065	0.000104589
Neuron_281	0.000458579	0.000415701	0.000363994	0.000250921	0.000221549	0.000190144	0.000164284	0.000158678	0.000130356	0.000127645	0.000131128	0.00011311	0.000114407	0.000118925	0.00012927	0.000115049	0.000107122	9.09156e-05	9.78735e-05	0.000113985	9.59513e-05	0.000100973	0.000100382	9.46497e-05	9.25764e-05	9.41753e-05	9.95404e-05	7.74045e-05	8.95605e-05	9.30687e-05	8.57996e-05	9.83385e-05	9.326e-05	8.29624e-05	8.35883e-05	8.64315e-05	7.81814e-05	7.15163e-05	7.99821e-05	7.58377e-05	8.56656e-05	7.75421e-05	7.97409e-05	6.69636e-05	6.95266e-05	7.09314e-05	5.98858e-05	6.40126e-05	6.44424e-05
Neuron_282	0.000545574	0.000534406	0.000479116	0.000360565	0.000283661	0.000261799	0.000208966	0.000204025	0.000170948	0.000148466	0.000164002	0.000148122	0.000132885	0.000143215	0.000173515	0.000145888	0.000131742	0.000122011	0.000128247	0.000125278	0.000121477	0.000126453	0.000112325	0.00010662	0.000128065	0.000109923	0.000129355	0.000102099	0.000110487	0.000102292	0.000103642	0.000114533	0.000112392	9.23909e-05	9.0099e-05	0.000107897	9.97195e-05	8.68379e-05	0.0001132	8.50308e-05	0.000109675	9.17754e-05	9.18179e-05	8.92534e-05	9.68096e-05	7.69852e-05	7.17942e-05	9.04602e-05	8.39424e-05
Neuron_283	0.000550334	0.000331857	0.00033703	0.000260929	0.000245669	0.000232033	0.000191164	0.000194397	0.000154954	0.000167903	0.000167509	0.000159508	0.000132701	0.000156152	0.000145584	0.000149244	0.000155586	0.000151206	0.000143337	0.000139359	0.000134027	0.000145089	0.0001082	0.000123178	0.000149027	0.000128298	0.000136928	0.000120047	0.000133125	0.000118976	9.99209e-05	0.000132755	0.0001147	0.000102813	0.00010899	0.000129051	0.000109633	0.000105128	0.000124578	0.00011071	0.000113527	0.000118253	0.000121504	0.00010756	0.000117131	8.46565e-05	9.66345e-05	9.29399e-05	8.49837e-05
Neuron_284	0.000281018	0.000353674	0.000277793	0.000199635	0.000146607	0.000139096	0.000108351	0.000119301	9.79277e-05	8.42165e-05	0.000100987	8.74839e-05	7.15462e-05	7.34239e-05	9.09722e-05	8.91874e-05	7.64347e-05	7.5096e-05	7.64672e-05	7.29087e-05	6.48843e-05	6.44186e-05	6.2784e-05	6.21678e-05	7.92093e-05	6.80847e-05	7.78127e-05	6.12421e-05	6.40054e-05	5.97683e-05	5.77158e-05	6.79419e-05	5.67369e-05	5.12232e-05	5.61815e-05	6.34216e-05	5.23766e-05	4.60751e-05	6.17922e-05	5.07555e-05	6.16666e-05	6.38688e-05	5.32799e-05	4.60174e-05	5.13855e-05	4.14026e-05	4.10956e-05	5.32264e-05	5.14264e-05
Neuron_285	0.000422834	0.000374016	0.000331834	0.00025833	0.000212016	0.000210297	0.00016538	0.000169301	0.000139927	0.00014341	0.000141342	0.000137424	0.000116339	0.000130281	0.000153438	0.000132182	0.00013198	0.000117367	0.00011794	0.000112874	0.000106063	0.000107273	0.000102491	0.000107471	0.000118398	0.000106446	0.000104122	9.85731e-05	0.000110111	9.37317e-05	9.06547e-05	0.000112353	8.41415e-05	8.5452e-05	9.05085e-05	0.000101262	8.10523e-05	8.04121e-05	9.74608e-05	8.39593e-05	9.56411e-05	9.91552e-05	9.04437e-05	7.71445e-05	8.50577e-05	7.12881e-05	7.51129e-05	7.9393e-05	7.4288e-05
Neuron_286	0.000562174	0.000441386	0.000407693	0.000285414	0.000236104	0.000210927	0.000181724	0.000182847	0.000136338	0.00013592	0.000138804	0.000126356	0.000117683	0.000124952	0.000129655	0.000130439	0.000117772	0.000110091	0.000108294	0.000115506	0.000106476	0.000110247	0.000100764	9.64969e-05	0.000115085	0.000100889	0.000104993	8.86006e-05	9.7272e-05	9.62392e-05	8.51367e-05	0.000102789	8.70507e-05	7.83318e-05	8.58655e-05	9.38794e-05	7.867e-05	7.96738e-05	9.11777e-05	7.71848e-05	8.59084e-05	8.06965e-05	8.05167e-05	7.67432e-05	8.55964e-05	6.92616e-05	6.68888e-05	7.09102e-05	7.17009e-05
Neuron_287	0.000633797	0.000563937	0.000525235	0.000366143	0.000303908	0.000275112	0.000238932	0.000234843	0.000187113	0.000175619	0.000192473	0.000176341	0.00016642	0.000192845	0.000220755	0.000169975	0.000166654	0.000143433	0.000154915	0.000164374	0.00015322	0.000162074	0.000142516	0.000135696	0.000138062	0.000131183	0.000136095	0.000132904	0.000138027	0.000128429	0.000131517	0.00013719	0.000129065	0.000117697	0.00010728	0.000123942	0.000123632	0.000118014	0.000133284	0.000104181	0.000134478	9.7931e-05	0.000106184	0.000111829	0.000123413	0.000103711	8.98649e-05	9.64911e-05	9.19888e-05
Neuron_288	0.000496879	0.00039818	0.000368094	0.000311331	0.000256832	0.000223163	0.000198144	0.000185439	0.000162668	0.000145704	0.000158917	0.0001506	0.000129638	0.00014151	0.000158256	0.000138842	0.000131128	0.000118354	0.000130161	0.00012902	0.000111886	0.000118729	0.000115477	0.000106547	0.000129568	0.000106247	0.000123757	9.80212e-05	0.00010397	0.000102057	0.000105041	0.000107526	0.000104641	9.852e-05	0.000100139	9.9857e-05	9.00232e-05	8.73637e-05	9.4344e-05	8.37829e-05	0.000103165	9.43649e-05	9.26322e-05	7.84942e-05	8.58549e-05	8.59993e-05	6.84639e-05	8.65285e-05	8.00025e-05
Neuron_289	0.000745559	0.000713522	0.000644748	0.00045969	0.000351567	0.000328738	0.00027814	0.000255413	0.000240592	0.00021383	0.000243328	0.000215596	0.000190776	0.000227585	0.000273543	0.000204229	0.000192007	0.000162205	0.000187248	0.000192347	0.000172587	0.000180827	0.000171909	0.000156802	0.000159409	0.000145751	0.00015077	0.00015115	0.000156534	0.000138118	0.000161048	0.000159437	0.000141354	0.000144929	0.000123279	0.000127678	0.000132651	0.000127603	0.000143225	0.0001147	0.000160568	0.0001308	0.000119618	0.000114791	0.000124753	0.0001202	9.80664e-05	0.00011048	0.000106341
Neuron_290	0.000429353	0.000379128	0.000341385	0.000243613	0.000190161	0.000172361	0.000142111	0.000128626	0.000106703	0.000104372	0.000104428	9.5081e-05	8.938e-05	9.87171e-05	0.000106461	9.59364e-05	8.4866e-05	7.79015e-05	7.967e-05	8.48063e-05	8.52028e-05	7.99761e-05	6.57848e-05	6.93295e-05	7.521e-05	6.67308e-05	7.61504e-05	7.04317e-05	6.85799e-05	6.39006e-05	6.85844e-05	6.82885e-05	5.93308e-05	5.57211e-05	5.40974e-05	6.17032e-05	6.03729e-05	6.23554e-05	6.78664e-05	4.9772e-05	6.6368e-05	4.95453e-05	5.03219e-05	5.50052e-05	6.03413e-05	4.63763e-05	4.54811e-05	4.98273e-05	4.33252e-05
Neuron_291	0.000356556	0.000331596	0.000271045	0.000231645	0.000182016	0.000176885	0.000140525	0.000142298	0.000123033	0.000114603	0.000114837	0.000107893	9.47244e-05	0.000103369	0.000121869	0.000112533	0.000101296	8.74936e-05	9.2687e-05	8.84202e-05	8.28981e-05	7.7659e-05	8.4568e-05	8.40265e-05	9.54064e-05	8.76564e-05	8.70227e-05	7.22197e-05	8.25497e-05	7.50657e-05	7.77624e-05	8.91948e-05	6.77493e-05	6.85318e-05	7.12274e-05	7.70546e-05	6.11388e-05	6.19641e-05	6.95075e-05	6.11323e-05	7.6543e-05	7.88456e-05	6.83572e-05	5.33584e-05	5.86753e-05	5.74052e-05	5.43522e-05	6.51791e-05	5.96098e-05
Neuron_292	0.000645596	0.000597065	0.000511103	0.000351408	0.000292243	0.000251726	0.000206465	0.000218398	0.000175098	0.000167288	0.000183242	0.000165331	0.000153618	0.000174921	0.000176629	0.000162829	0.000154475	0.000146471	0.000145459	0.000158471	0.000144238	0.000152348	0.000129867	0.0001282	0.000143028	0.000133036	0.000138072	0.000122774	0.000132348	0.000122635	0.000112238	0.00012835	0.000122488	0.000107288	0.000112033	0.000130647	0.000107965	0.000106527	0.000132684	0.000113218	0.000121813	0.000105936	0.000115001	0.000108181	0.000117553	9.23547e-05	9.11426e-05	9.67789e-05	9.01443e-05
Neuron_293	0.000258277	0.000211909	0.000196021	0.000141448	0.000126932	0.000118233	9.94696e-05	9.73543e-05	7.92518e-05	8.30936e-05	7.90429e-05	6.86107e-05	6.43062e-05	7.01593e-05	6.94632e-05	7.31727e-05	6.88118e-05	6.27361e-05	6.06802e-05	6.46346e-05	6.06904e-05	6.40285e-05	5.30668e-05	5.45987e-05	6.24837e-05	5.92519e-05	6.2701e-05	5.13249e-05	5.82906e-05	5.66325e-05	5.02553e-05	6.3846e-05	5.46406e-05	4.78467e-05	5.14254e-05	5.41699e-05	5.01561e-05	4.85015e-05	4.92381e-05	4.63525e-05	5.09276e-05	5.2574e-05	5.19617e-05	4.35487e-05	4.72481e-05	4.02014e-05	4.18755e-05	4.20432e-05	3.853e-05
Neuron_294	0.00047764	0.000446169	0.000395635	0.000321173	0.000272066	0.000250366	0.000224583	0.000204199	0.000177277	0.000177976	0.000172784	0.000159747	0.00014417	0.000153606	0.000146974	0.000155068	0.000144512	0.000137884	0.00013893	0.000138717	0.000131245	0.000132748	0.00011446	0.00011563	0.000151086	0.000130917	0.000143575	0.000102648	0.000120603	0.000117386	0.000111993	0.000127263	0.000114151	0.00010526	0.000109419	0.00011835	0.00010005	9.81994e-05	0.000108171	9.36429e-05	0.000116536	0.000127449	0.000117021	9.29133e-05	9.45909e-05	8.76648e-05	8.88105e-05	9.52851e-05	9.2243e-05
Neuron_295	0.000370943	0.000368654	0.000335652	0.000242044	0.000214023	0.000183776	0.000166021	0.000163063	0.000138171	0.000131453	0.000140936	0.000129776	0.000116984	0.000129578	0.000140765	0.000120532	0.000120623	0.000105963	0.00011463	0.000116772	0.000104009	0.000112915	0.000103507	9.81056e-05	0.000105244	0.000102105	0.00010641	9.014e-05	0.000100777	9.67969e-05	9.36167e-05	0.000101056	9.78101e-05	8.64499e-05	8.80887e-05	9.47787e-05	8.74752e-05	7.89977e-05	9.55419e-05	7.83109e-05	9.84144e-05	8.95313e-05	8.56214e-05	7.86829e-05	8.29098e-05	7.32788e-05	6.67341e-05	7.28233e-05	6.93413e-05
Neuron_296	0.000297209	0.000222907	0.000230318	0.000167321	0.000145214	0.000120269	0.000104163	0.000105326	8.38051e-05	7.81692e-05	9.33855e-05	8.862e-05	7.63461e-05	8.69066e-05	0.000100099	7.58835e-05	7.91525e-05	7.1547e-05	7.81982e-05	7.44728e-05	6.92504e-05	7.65418e-05	6.40317e-05	6.47287e-05	7.05563e-05	6.54507e-05	6.80679e-05	6.61076e-05	6.73792e-05	6.41454e-05	6.14857e-05	6.63348e-05	6.21904e-05	5.52402e-05	5.69313e-05	6.3984e-05	5.90689e-05	5.40781e-05	6.72479e-05	5.3766e-05	6.24627e-05	5.02534e-05	5.47415e-05	5.46951e-05	6.04998e-05	4.98072e-05	4.35206e-05	5.04214e-05	4.66373e-05
Neuron_297	0.000604834	0.000520209	0.000442358	0.000309446	0.000249216	0.00020464	0.00019161	0.000164166	0.000127059	0.000126737	0.000110387	0.000104558	0.00010991	0.000120945	9.91164e-05	0.000107824	9.06264e-05	8.04086e-05	8.94858e-05	9.0877e-05	9.9015e-05	0.000103346	8.26016e-05	7.67729e-05	0.000102331	8.94934e-05	9.59778e-05	5.51952e-05	7.3365e-05	8.32305e-05	7.58924e-05	8.92762e-05	7.62023e-05	5.11784e-05	5.73697e-05	7.59475e-05	6.79956e-05	6.63323e-05	7.63337e-05	5.26318e-05	7.5647e-05	6.23019e-05	6.98181e-05	7.47367e-05	6.9707e-05	4.50699e-05	5.49158e-05	6.40318e-05	5.65168e-05
Neuron_298	0.000658757	0.00055414	0.000548317	0.000338325	0.00026801	0.000246106	0.000222865	0.000206509	0.000159075	0.000175938	0.000165752	0.000148321	0.000129515	0.000166906	0.000169887	0.000131352	0.000138434	0.000129982	0.000128049	0.000135992	0.000137786	0.000143146	0.000109237	0.000109797	0.00011859	0.000102068	0.000120108	0.000117152	0.000114569	0.000104203	0.000105729	0.000112917	0.000105012	8.77035e-05	7.06996e-05	0.000104385	0.000103345	9.45674e-05	0.000118795	8.53752e-05	0.000112706	8.37731e-05	9.47944e-05	0.000105704	0.000107337	7.1864e-05	7.71212e-05	7.93626e-05	7.2175e-05
Neuron_299	0.000377888	0.000305728	0.000266974	0.000196231	0.00017068	0.000146721	0.00012599	0.000118453	9.42105e-05	9.94758e-05	9.28429e-05	8.906e-05	7.53696e-05	8.53955e-05	8.18664e-05	8.71809e-05	8.16516e-05	7.69752e-05	7.67663e-05	7.69371e-05	7.43595e-05	8.35528e-05	6.58697e-05	6.59879e-05	8.48606e-05	6.37968e-05	7.53524e-05	5.77381e-05	6.41743e-05	6.34991e-05	6.08255e-05	6.77827e-05	6.12015e-05	5.44416e-05	5.38809e-05	6.67706e-05	5.54298e-05	5.57159e-05	6.34744e-05	5.45478e-05	5.85245e-05	5.96149e-05	6.07194e-05	5.97856e-05	5.95326e-05	4.53879e-05	4.74969e-05	5.47393e-05	4.93028e-05
Neuron_300	0.000459445	0.000465412	0.000387239	0.000318732	0.00026962	0.000238477	0.000202835	0.000195049	0.000177235	0.000161561	0.000169403	0.00015208	0.000136072	0.00014472	0.000147368	0.000147833	0.000137608	0.00013108	0.000133398	0.000133367	0.000120422	0.000129963	0.000112687	0.000111724	0.000136357	0.000126194	0.000133266	0.000103437	0.000114695	0.000113045	0.000102701	0.000124631	0.000113857	0.000101877	0.000108592	0.000109651	9.87481e-05	8.62618e-05	0.000104028	9.14884e-05	0.000111554	0.000118269	0.000109157	8.58217e-05	8.65211e-05	8.28151e-05	8.32542e-05	8.64411e-05	8.54831e-05
Neuron_301	0.0005693	0.00057651	0.000520818	0.000429132	0.000365983	0.000321977	0.000256443	0.000242445	0.000221826	0.000196156	0.000230488	0.000193645	0.00018044	0.000190308	0.0002309	0.00020606	0.000178928	0.000161947	0.000170474	0.000171303	0.000157228	0.000161608	0.000145608	0.000151594	0.000164478	0.000153634	0.000161749	0.000137929	0.000147703	0.000138454	0.000147611	0.000171474	0.000151882	0.000141588	0.000134276	0.000139105	0.000135441	0.000130855	0.00013081	0.000119463	0.000143851	0.000129633	0.000127134	0.000103615	0.000117656	0.000119085	0.000100612	0.000115427	0.000108638
Neuron_302	0.000329592	0.000341138	0.000297887	0.000227017	0.000177909	0.000159194	0.000134373	0.000134858	0.00011342	9.68283e-05	0.00011311	0.000101014	8.01413e-05	8.55184e-05	9.87373e-05	0.000101991	8.33179e-05	8.77279e-05	8.74827e-05	8.34516e-05	7.61295e-05	7.84969e-05	7.20244e-05	7.36893e-05	9.72852e-05	7.89278e-05	9.38891e-05	7.17508e-05	6.86466e-05	6.99738e-05	6.471e-05	7.60053e-05	6.83787e-05	5.86527e-05	6.78588e-05	7.18493e-05	5.97009e-05	5.3834e-05	6.76929e-05	5.96642e-05	6.8847e-05	6.55705e-05	6.47595e-05	5.63076e-05	5.97058e-05	4.99181e-05	4.71397e-05	6.35659e-05	5.694e-05
Neuron_303	0.000492412	0.000444004	0.000407874	0.000295172	0.000270157	0.000229977	0.0002026	0.000193561	0.000163781	0.000159061	0.000168334	0.000149618	0.000142783	0.000162096	0.000175409	0.00014409	0.000136423	0.000121289	0.000130323	0.000142083	0.000128302	0.000135276	0.000124319	0.000119817	0.000122643	0.000122346	0.000129485	0.000104758	0.000116011	0.000117812	0.000106485	0.000126094	0.000122783	0.000105066	0.000101289	0.000111669	0.000105581	9.44014e-05	0.000109947	0.000101035	0.000112717	0.000100013	0.000103868	9.32123e-05	9.5206e-05	8.86155e-05	7.69245e-05	8.43413e-05	8.23544e-05
Neuron_304	0.000379106	0.000334875	0.00032451	0.000235102	0.000202783	0.000169308	0.000149579	0.000136423	0.000115596	0.000113664	0.000126344	0.000105814	0.000103257	0.000108155	0.000123214	0.000105336	9.99913e-05	8.89483e-05	9.08146e-05	9.91063e-05	8.84497e-05	9.85197e-05	8.46894e-05	8.17172e-05	9.02439e-05	7.85028e-05	9.5507e-05	7.73963e-05	8.26522e-05	7.73131e-05	8.15851e-05	8.74689e-05	8.75982e-05	7.69598e-05	7.38739e-05	7.43586e-05	7.71331e-05	7.02293e-05	7.25234e-05	6.75308e-05	7.96497e-05	6.63031e-05	7.32297e-05	6.48401e-05	6.69661e-05	6.63658e-05	5.5025e-05	6.10853e-05	5.78207e-05
Neuron_305	0.000266909	0.000264397	0.000253198	0.000178988	0.000137114	0.00012733	0.000107797	0.000106084	8.77533e-05	7.90771e-05	9.08556e-05	8.19774e-05	6.44867e-05	7.00992e-05	8.03749e-05	7.79604e-05	6.89705e-05	6.97329e-05	7.22041e-05	6.81596e-05	6.17361e-05	6.31143e-05	5.76673e-05	5.44932e-05	7.44249e-05	6.03183e-05	6.95682e-05	6.04316e-05	5.73275e-05	5.35256e-05	4.90193e-05	6.04792e-05	5.23567e-05	4.72433e-05	5.44284e-05	5.70954e-05	5.13246e-05	4.26202e-05	5.90897e-05	4.35635e-05	5.80868e-05	5.4321e-05	4.91769e-05	4.50552e-05	5.03648e-05	3.87478e-05	3.65285e-05	4.53783e-05	4.26046e-05
Neuron_306	0.000463249	0.000438573	0.000379927	0.000305958	0.000286474	0.000245675	0.000209512	0.000201153	0.00018003	0.000169561	0.000182913	0.000160185	0.000155529	0.000162287	0.000188811	0.00016534	0.000157154	0.000131046	0.000141171	0.000153429	0.000127402	0.000142298	0.00013783	0.000130305	0.000136274	0.000128239	0.000137592	0.000112608	0.000127192	0.000122847	0.000123933	0.000137459	0.00013432	0.000127119	0.000123212	0.000117001	0.000116982	0.000106012	0.000103743	0.000107838	0.000120922	0.000110968	0.000113251	8.91869e-05	9.69482e-05	0.000108511	8.52888e-05	9.4195e-05	9.04391e-05
Neuron_307	0.000443312	0.000353501	0.000326462	0.00026898	0.000220886	0.000204748	0.000172115	0.00016476	0.000137317	0.000123948	0.000141911	0.000126455	0.000113181	0.0001199	0.000121376	0.000123248	0.000112359	0.000103274	0.000110727	0.000105281	9.43296e-05	9.81142e-05	8.84635e-05	8.64747e-05	0.000115878	9.97321e-05	0.000104906	8.52835e-05	9.34223e-05	8.75936e-05	8.61904e-05	0.000102478	8.42682e-05	7.97846e-05	8.35511e-05	9.19497e-05	7.99431e-05	7.89503e-05	8.55913e-05	6.67886e-05	9.02608e-05	8.51131e-05	8.37778e-05	6.82868e-05	7.75111e-05	6.84431e-05	6.65082e-05	7.30142e-05	7.11496e-05
Neuron_308	0.00029783	0.000292079	0.00026294	0.00018888	0.000150072	0.000124215	0.000109434	0.000101369	8.70895e-05	7.65848e-05	8.55399e-05	7.91086e-05	7.43047e-05	7.81248e-05	9.49844e-05	7.88113e-05	6.9333e-05	5.8434e-05	6.74826e-05	7.16983e-05	6.21645e-05	6.60338e-05	6.06782e-05	5.62183e-05	5.85362e-05	5.62334e-05	6.05048e-05	5.24537e-05	5.53219e-05	5.19661e-05	5.83251e-05	5.80406e-05	5.36086e-05	5.20571e-05	4.8793e-05	4.70083e-05	5.02581e-05	4.8922e-05	4.96449e-05	4.31916e-05	5.39524e-05	4.27986e-05	4.05112e-05	4.16896e-05	4.67678e-05	4.57215e-05	3.4082e-05	4.06995e-05	3.82573e-05
Neuron_309	0.000490755	0.000426823	0.000389612	0.000311567	0.000298383	0.0002571	0.000226127	0.000214449	0.000188433	0.000185343	0.000188119	0.00016438	0.000158378	0.000169681	0.000179451	0.000171909	0.000158068	0.000140019	0.00014296	0.000155688	0.000140839	0.00014904	0.000136841	0.00013848	0.000146496	0.000140722	0.000153119	0.000113691	0.000134044	0.0001329	0.000125255	0.000151329	0.000140519	0.000125162	0.000126448	0.000124496	0.000114861	0.000108369	0.000110385	0.000116311	0.000123532	0.000124196	0.000127414	9.76214e-05	9.91786e-05	0.0001061	9.31347e-05	9.88418e-05	9.44659e-05
Neuron_310	0.00039713	0.000354041	0.000341313	0.000266828	0.000218124	0.000209963	0.000166955	0.000164613	0.000139035	0.000128015	0.00015114	0.000131453	0.000110266	0.000116367	0.000131014	0.000129814	0.000115521	0.000110715	0.000116284	0.000112119	9.95052e-05	9.90236e-05	8.85259e-05	9.10206e-05	0.000120267	9.70024e-05	0.000110583	9.4834e-05	9.5855e-05	8.48979e-05	8.99682e-05	0.000103863	8.6467e-05	8.80996e-05	8.92224e-05	9.56321e-05	8.22672e-05	8.01261e-05	8.88394e-05	7.35935e-05	9.49576e-05	9.14777e-05	8.4899e-05	6.94919e-05	7.84106e-05	7.25938e-05	6.64605e-05	7.47963e-05	7.32268e-05
Neuron_311	0.000393799	0.000458721	0.000352336	0.000250986	0.000183577	0.000165845	0.000117537	0.000127416	0.000109297	8.75134e-05	0.000108373	8.97744e-05	7.88248e-05	7.79094e-05	0.000114377	9.70727e-05	6.8631e-05	6.90319e-05	7.67029e-05	7.69905e-05	6.87233e-05	6.69994e-05	6.7177e-05	6.51986e-05	7.20323e-05	6.5251e-05	7.71154e-05	5.90362e-05	5.64178e-05	6.34115e-05	6.09076e-05	7.36153e-05	6.15658e-05	5.49282e-05	5.34155e-05	6.1606e-05	5.39849e-05	4.87542e-05	5.67066e-05	5.17173e-05	6.09558e-05	5.45571e-05	4.6372e-05	4.07813e-05	4.70984e-05	4.37371e-05	3.50018e-05	5.35746e-05	4.67602e-05
Neuron_312	0.000486552	0.00047175	0.000435382	0.000327976	0.000304493	0.000274395	0.000236459	0.00022487	0.00019096	0.000190939	0.000197755	0.000168614	0.000158615	0.000170439	0.000183025	0.000179061	0.00016103	0.000150896	0.000147832	0.000156018	0.000142551	0.000147354	0.000131873	0.000135118	0.00015922	0.000143998	0.000153889	0.000124655	0.000136456	0.000128766	0.000118961	0.000154446	0.000137892	0.000124204	0.000124919	0.000125181	0.000119239	0.000107622	0.000118961	0.000113085	0.000130076	0.000132951	0.000127796	0.000100689	0.000105554	0.000101206	9.744e-05	9.73365e-05	0.000100172
Neuron_313	0.000569126	0.000501022	0.000463716	0.000332728	0.000269441	0.000248116	0.000193872	0.000195805	0.000160567	0.000156123	0.000177674	0.000151754	0.00012813	0.000144839	0.000148667	0.00015596	0.000143732	0.00014615	0.000135467	0.000135606	0.000121263	0.000130975	0.000109393	0.000116267	0.000146924	0.000123679	0.000137416	0.000118786	0.000120388	0.000109002	9.60245e-05	0.000120786	0.000105615	0.000101753	0.00010762	0.000122332	0.000102359	9.92679e-05	0.000117089	0.000103491	0.000107576	0.000106457	0.000109351	9.26298e-05	0.0001094	8.16399e-05	8.83798e-05	9.459e-05	7.98489e-05
Neuron_314	0.000505298	0.000469932	0.000419028	0.000306087	0.000256015	0.000235338	0.000189331	0.00018612	0.000152374	0.0001457	0.000161004	0.000143061	0.000115323	0.000126988	0.000140188	0.00013895	0.000118896	0.000122667	0.000124651	0.000122113	0.000111731	0.000113995	9.77493e-05	0.00010126	0.000132677	0.000103678	0.000123138	0.000103746	9.84774e-05	9.63837e-05	9.08371e-05	0.00011296	9.72209e-05	9.16164e-05	9.66261e-05	9.72674e-05	9.06051e-05	7.50763e-05	9.85881e-05	8.36858e-05	9.9404e-05	9.68443e-05	9.1554e-05	7.80902e-05	8.42274e-05	7.25574e-05	6.7747e-05	7.81085e-05	7.96533e-05
Neuron_315	0.000504124	0.000524786	0.000469245	0.000378457	0.000300728	0.000264659	0.0002309	0.000209562	0.000186506	0.000169518	0.000182488	0.000160823	0.000146583	0.000164074	0.000181286	0.000162348	0.000144269	0.000121289	0.000137582	0.000139135	0.000127844	0.000128538	0.000120963	0.000115506	0.000140121	0.000121936	0.00013332	9.96981e-05	0.000115368	0.000109435	0.000125182	0.000124459	0.000105335	0.000101004	9.55946e-05	0.000108482	9.5424e-05	9.97702e-05	0.000110642	7.85348e-05	0.000116781	0.000108737	0.000102339	8.98047e-05	9.22715e-05	8.56877e-05	7.64036e-05	9.91015e-05	8.5198e-05
Neuron_316	0.000573028	0.000584521	0.000547853	0.000423289	0.00035426	0.000336278	0.000301377	0.000287648	0.000249205	0.000238088	0.000255231	0.000229287	0.000186671	0.000201223	0.000198733	0.00021832	0.00020564	0.000208977	0.000202826	0.000198973	0.000174042	0.000183201	0.000161656	0.000161504	0.000227226	0.000184539	0.000210269	0.00016249	0.000172439	0.000158423	0.000146242	0.000174708	0.000162006	0.000146848	0.000163056	0.000168142	0.000145986	0.000126845	0.000162503	0.000136344	0.0001655	0.000178766	0.000165754	0.000132904	0.000140932	0.000120111	0.000120851	0.000137121	0.000131262
Neuron_317	0.000490757	0.000410762	0.000391635	0.000302171	0.000280861	0.000244808	0.000226595	0.000204949	0.00017407	0.000186563	0.00016827	0.0001584	0.000140954	0.000153402	0.000138655	0.000162343	0.000145878	0.000145172	0.000139643	0.000144551	0.00013713	0.000148857	0.000113688	0.000116705	0.000146219	0.000125586	0.000145698	0.000106653	0.000122962	0.000121273	0.000108149	0.000133694	0.000123335	0.000108541	0.000110959	0.000115117	0.000110121	0.000104802	0.000103849	0.000107655	0.000109759	0.000124197	0.000122232	0.000100236	0.000102066	9.01275e-05	9.35191e-05	9.59855e-05	8.4124e-05
Neuron_318	0.00081442	0.000863403	0.000724591	0.000501337	0.000412579	0.000376056	0.000315303	0.000297873	0.000242821	0.000238442	0.000236008	0.000220826	0.000197256	0.0002295	0.000262744	0.00022449	0.000210202	0.000180149	0.000190208	0.000193318	0.000191251	0.000197062	0.000170142	0.000169406	0.000182379	0.000165528	0.000163086	0.000153796	0.000170488	0.000145998	0.000156868	0.000172913	0.000143114	0.000142176	0.000128933	0.000150043	0.000137265	0.00013559	0.000164396	0.000125869	0.000159947	0.000141859	0.000129218	0.000136927	0.000142825	0.000116094	0.000115256	0.000121412	0.000117455
Neuron_319	0.000612977	0.000516804	0.000479223	0.000366676	0.000327808	0.000289419	0.000255389	0.000240041	0.000206344	0.000202556	0.000208397	0.000187414	0.000177718	0.000184582	0.000196244	0.000183674	0.0001683	0.000155552	0.00016184	0.000173778	0.000153577	0.00016712	0.000145127	0.000142616	0.000158448	0.000149511	0.000163297	0.000127672	0.000143176	0.000139237	0.000134715	0.00015765	0.000151037	0.000139342	0.000133699	0.000125053	0.000127833	0.000112618	0.000117452	0.000127557	0.000139438	0.000139099	0.000139295	0.000108344	0.00010599	0.000116884	0.000101784	0.000101291	0.000101711
Neuron_320	0.000535962	0.000539271	0.000435154	0.000330795	0.00028517	0.000255941	0.000216877	0.000204197	0.000175788	0.000181351	0.000163234	0.000150359	0.000155978	0.000153806	0.000142908	0.00015379	0.000140216	0.000130103	0.000129299	0.000149225	0.000131038	0.000135097	0.000124212	0.00012079	0.000127946	0.000133923	0.000134438	9.43279e-05	0.00012057	0.000120618	0.000109479	0.000128941	0.00011937	0.000107415	0.000107342	0.000116257	9.4836e-05	9.67244e-05	0.000100727	0.00010569	0.000112693	0.000122542	0.000119837	9.01223e-05	8.70535e-05	9.07401e-05	8.81393e-05	8.57673e-05	8.20825e-05
Neuron_321	0.000678614	0.000653188	0.00059233	0.000406315	0.000314178	0.000288388	0.00024901	0.000231204	0.000184973	0.00019069	0.000187633	0.000174081	0.000148175	0.00017607	0.000195223	0.000167791	0.000144647	0.000134272	0.000149527	0.000150043	0.000139126	0.000139317	0.000127638	0.000117179	0.000146555	0.000114479	0.000125236	0.000119742	0.000115338	0.000107512	0.000119307	0.000126285	0.000108034	0.000104643	9.24325e-05	0.000103977	0.000103916	9.65618e-05	0.000115534	8.72983e-05	0.000123686	0.000104586	9.51619e-05	9.63075e-05	0.000100659	8.44095e-05	8.09404e-05	8.9631e-05	9.13022e-05
Neuron_322	0.000481182	0.000464102	0.000427514	0.000334509	0.000266418	0.000245882	0.000210737	0.000197103	0.00018204	0.000161016	0.000185962	0.000160336	0.00014426	0.000160068	0.000183355	0.000161514	0.000144784	0.000127876	0.000141326	0.000145128	0.000127006	0.000127651	0.00012192	0.000115047	0.000133523	0.000119389	0.000129566	0.00011063	0.000118692	0.000106811	0.000119553	0.000125721	0.000108863	0.000110049	0.000104224	0.000110418	0.000103617	0.00010353	0.000107295	8.20937e-05	0.000120628	0.000112664	0.000100984	8.40825e-05	9.33293e-05	9.20387e-05	7.80771e-05	9.35316e-05	8.33888e-05
Neuron_323	0.00038029	0.000429834	0.000320474	0.000204165	0.000157108	0.00015035	0.000114694	0.000126249	0.000101893	9.14927e-05	0.000101791	9.00748e-05	7.74903e-05	8.43201e-05	0.000106897	9.33159e-05	7.85796e-05	7.70784e-05	7.73309e-05	7.62197e-05	7.1934e-05	7.44044e-05	6.96948e-05	6.8615e-05	7.99348e-05	6.5721e-05	7.41822e-05	7.12094e-05	6.55686e-05	6.68699e-05	5.89893e-05	7.75914e-05	6.42121e-05	5.29118e-05	6.19554e-05	6.39214e-05	5.79696e-05	4.61121e-05	6.72892e-05	5.4338e-05	6.76447e-05	5.92361e-05	5.4468e-05	5.12844e-05	5.62052e-05	4.3095e-05	4.35569e-05	4.59827e-05	5.34564e-05
Neuron_324	0.000654843	0.000592312	0.00051388	0.000350081	0.000274459	0.000259491	0.000210884	0.000219546	0.000164889	0.000162909	0.000171094	0.000143985	0.000121511	0.000130504	0.000140149	0.000153686	0.000124516	0.000127923	0.000124261	0.000127122	0.000119285	0.000116903	0.000107678	0.000108443	0.000144403	0.000113084	0.000132399	0.000107994	0.000102688	0.000111972	9.43635e-05	0.00012792	0.00010219	9.11412e-05	0.000102354	0.000104785	9.41848e-05	7.84427e-05	0.000102156	8.66205e-05	0.000102515	0.000100054	9.49175e-05	8.2204e-05	8.8333e-05	7.31295e-05	7.34738e-05	8.03469e-05	8.96767e-05
Neuron_325	0.000555528	0.000542055	0.000354394	0.000255448	0.000208095	0.000192653	0.000135879	0.000142458	0.000106587	9.28912e-05	0.000101188	8.83925e-05	7.93639e-05	8.0534e-05	9.28362e-05	0.000100862	6.89179e-05	7.23592e-05	7.44408e-05	7.45072e-05	7.13635e-05	7.31259e-05	6.2971e-05	6.45428e-05	7.89887e-05	6.70773e-05	6.99574e-05	5.86665e-05	5.43438e-05	6.13429e-05	5.4705e-05	7.26374e-05	5.94583e-05	5.13184e-05	5.51128e-05	6.44256e-05	5.07056e-05	4.80983e-05	5.80717e-05	5.43342e-05	5.54426e-05	5.15316e-05	4.9231e-05	4.85088e-05	4.97045e-05	3.99261e-05	4.2218e-05	5.03853e-05	4.72732e-05
Neuron_326	0.000298594	0.000318938	0.000231838	0.000177883	0.000151178	0.000142483	0.000105369	0.000111614	9.26075e-05	9.08353e-05	8.95368e-05	7.92656e-05	7.07132e-05	7.60474e-05	8.47365e-05	9.20137e-05	8.02838e-05	7.47986e-05	6.94813e-05	7.20596e-05	6.78505e-05	7.00841e-05	6.3736e-05	6.81835e-05	7.94716e-05	6.74249e-05	7.00917e-05	5.76532e-05	6.61002e-05	6.07389e-05	5.50772e-05	7.50678e-05	5.93078e-05	5.38217e-05	5.77553e-05	6.63849e-05	5.04275e-05	4.86753e-05	6.17079e-05	5.62391e-05	5.7919e-05	6.40915e-05	5.81285e-05	4.95489e-05	5.47114e-05	4.3875e-05	4.78374e-05	4.74629e-05	4.87907e-05
Neuron_327	0.000332479	0.000266557	0.000256723	0.000208213	0.0001882	0.000168547	0.00014015	0.000135075	0.000113404	0.000119681	0.000117002	0.000103218	0.000102209	0.000104356	0.000102684	0.000101681	9.18357e-05	8.85469e-05	8.91487e-05	0.00010021	9.07109e-05	8.73299e-05	8.04713e-05	8.14672e-05	8.40347e-05	9.10099e-05	9.29414e-05	6.8601e-05	8.0566e-05	8.13014e-05	7.1181e-05	8.83512e-05	8.28771e-05	7.70578e-05	7.30008e-05	7.76023e-05	6.75017e-05	6.58933e-05	6.97041e-05	7.56565e-05	7.54302e-05	8.34838e-05	7.97921e-05	6.01136e-05	5.8778e-05	6.41035e-05	5.85759e-05	5.7024e-05	5.51841e-05
Neuron_328	0.000507253	0.000491556	0.000434412	0.000301068	0.00026842	0.000250219	0.000207819	0.000198441	0.000161046	0.000168944	0.000167516	0.000158017	0.000137657	0.00015842	0.000178937	0.000154128	0.000150431	0.000133556	0.000136321	0.000137569	0.000136156	0.000139774	0.000117492	0.000120213	0.000132269	0.000113315	0.000115717	0.000111445	0.000121277	0.000101588	0.000108937	0.000120225	9.85156e-05	0.000103475	9.40332e-05	0.0001085	9.60712e-05	9.78167e-05	0.000113261	9.40335e-05	0.000111131	0.000103081	9.54693e-05	9.80411e-05	0.000101377	8.44267e-05	8.43534e-05	8.47299e-05	8.12716e-05
Neuron_329	0.000228264	0.000227681	0.000194737	0.000163036	0.000138907	0.000132189	0.00011416	0.00010567	9.71483e-05	8.72909e-05	0.000102644	9.05762e-05	8.65738e-05	9.27673e-05	0.000113501	9.01535e-05	8.43292e-05	6.84283e-05	7.80438e-05	8.19609e-05	7.0126e-05	6.95631e-05	7.32029e-05	6.70561e-05	6.98886e-05	6.52005e-05	6.92591e-05	5.82483e-05	6.85246e-05	5.99278e-05	7.29537e-05	6.90073e-05	6.21202e-05	6.68909e-05	5.87274e-05	6.06292e-05	5.44492e-05	5.93102e-05	5.76664e-05	4.85372e-05	6.65266e-05	5.98746e-05	5.38578e-05	4.33965e-05	5.06324e-05	5.69271e-05	4.31277e-05	5.0344e-05	4.8475e-05
Neuron_330	0.000424817	0.000350832	0.000358792	0.000256094	0.000204166	0.000178679	0.000155216	0.000148332	0.000115	0.000126314	0.000123806	0.000114408	0.00010455	0.00011735	0.000119328	0.000101491	0.000105489	8.89501e-05	9.73868e-05	9.30128e-05	9.47118e-05	8.77341e-05	8.11209e-05	8.22526e-05	8.73796e-05	8.40241e-05	8.60968e-05	7.39486e-05	8.67436e-05	8.10828e-05	8.28792e-05	8.46365e-05	7.03645e-05	6.65068e-05	6.38504e-05	8.02767e-05	6.73418e-05	7.14384e-05	8.27366e-05	5.89522e-05	8.40515e-05	7.46009e-05	6.71661e-05	6.57119e-05	7.10512e-05	5.61335e-05	5.82319e-05	5.87847e-05	6.03379e-05
Neuron_331	0.000783222	0.000700273	0.000671626	0.000496486	0.000425221	0.00035068	0.000310103	0.000282804	0.000236211	0.000223498	0.000238905	0.000198535	0.000190711	0.000195541	0.000217725	0.000210787	0.000170588	0.000158416	0.000167509	0.000183971	0.000167156	0.000171547	0.000149698	0.000147443	0.000170356	0.000150575	0.000174618	0.000135232	0.000134523	0.000141586	0.000145025	0.000159368	0.000154444	0.000141107	0.000130588	0.000128513	0.000136541	0.000129951	0.000120733	0.000122971	0.000133236	0.00011895	0.000123271	0.000108285	0.000113004	0.000115797	9.49618e-05	0.000112217	0.000104095
Neuron_332	0.000403181	0.000361822	0.000327476	0.000245115	0.000212805	0.000175381	0.00017468	0.000149214	0.000136402	0.000128723	0.000126064	0.000117788	9.96801e-05	0.000115083	0.000105084	0.000116407	0.000102289	9.68252e-05	0.000103484	0.000104671	9.94893e-05	0.000109923	8.55389e-05	8.7035e-05	0.000114305	9.13878e-05	0.000110904	7.46234e-05	8.21878e-05	8.713e-05	8.97557e-05	9.38426e-05	9.13391e-05	7.38214e-05	7.78819e-05	8.25859e-05	8.16104e-05	7.48943e-05	7.8976e-05	6.77767e-05	8.59436e-05	7.93212e-05	8.56893e-05	7.75064e-05	7.58465e-05	6.29572e-05	6.08989e-05	7.77699e-05	6.1309e-05
Neuron_333	0.000645694	0.000579974	0.000507496	0.000400748	0.00035169	0.000314087	0.000281608	0.000261119	0.000235367	0.000235484	0.000229354	0.000206009	0.000184902	0.000199415	0.000185437	0.000200276	0.000182782	0.0001856	0.000180953	0.000186469	0.00017521	0.000181657	0.000149899	0.000154517	0.000185052	0.000167414	0.000189667	0.000132316	0.00015324	0.000155693	0.000148926	0.000165072	0.000157797	0.000141668	0.000140676	0.000147099	0.000133375	0.000128974	0.000136104	0.000136344	0.000149945	0.000164928	0.000155928	0.000123808	0.000121226	0.000116191	0.00011618	0.000124755	0.00010902
Neuron_334	0.000828018	0.000754204	0.0007521	0.000583197	0.000542415	0.00049226	0.000437227	0.000414821	0.000353299	0.000365937	0.000369563	0.000327818	0.000296019	0.000318453	0.000310432	0.000318336	0.000304322	0.000297793	0.000287901	0.000301456	0.000275939	0.000282848	0.000240843	0.000252147	0.000292974	0.000273242	0.000299056	0.000230041	0.00026034	0.000246621	0.000223188	0.000271207	0.00025315	0.000234351	0.000231619	0.00024199	0.000219395	0.000201296	0.000226217	0.000214223	0.000243158	0.000264135	0.000249954	0.000192881	0.000198139	0.000188794	0.00018575	0.000186312	0.000180503
Neuron_335	0.000777689	0.000799374	0.000668093	0.000526804	0.00049135	0.000439713	0.000356585	0.000354601	0.000315193	0.000307092	0.000311094	0.000278125	0.000253365	0.000280309	0.000297265	0.000290762	0.000272412	0.00025776	0.000247381	0.000248513	0.000237765	0.000260934	0.000209816	0.000221452	0.000255587	0.000230879	0.00024168	0.000194021	0.000230792	0.000207522	0.000191981	0.000253763	0.000226415	0.000195405	0.000193672	0.000219097	0.0001952	0.000182566	0.000206454	0.00019585	0.000205115	0.000220035	0.000210331	0.000176162	0.000188098	0.000159816	0.000167545	0.000163083	0.000157124
Neuron_336	0.000491556	0.000403058	0.000368708	0.000280725	0.000235778	0.000205067	0.000187795	0.000167779	0.000140578	0.000136603	0.000135563	0.000127964	0.000109264	0.000117349	0.000121246	0.000128621	0.000103694	0.00010619	0.000109443	0.000113119	0.000104871	0.000108132	9.05393e-05	8.82296e-05	0.000115911	8.79487e-05	0.000108873	8.37705e-05	8.13325e-05	8.51189e-05	8.77665e-05	8.97449e-05	8.37275e-05	8.02314e-05	8.23847e-05	8.29398e-05	7.69615e-05	7.66811e-05	7.82172e-05	6.98973e-05	8.23854e-05	7.70059e-05	7.75871e-05	7.28464e-05	7.25728e-05	6.69434e-05	5.90971e-05	7.38319e-05	6.36781e-05
Neuron_337	0.000277833	0.00024675	0.00022606	0.000192951	0.000191193	0.000173333	0.000146812	0.000143144	0.000122184	0.000125565	0.000130995	0.000115338	0.000104911	0.000113075	0.000115104	0.000118666	0.000116489	0.000109703	0.0001028	0.000103209	9.26503e-05	0.000102958	8.66306e-05	9.10655e-05	0.000109106	9.61736e-05	0.00010534	8.28212e-05	9.8789e-05	8.75004e-05	8.00986e-05	0.000104038	9.3798e-05	8.48259e-05	8.70109e-05	9.09122e-05	8.02615e-05	7.62952e-05	8.11134e-05	7.93563e-05	8.49602e-05	9.57928e-05	9.22477e-05	6.98903e-05	7.6129e-05	7.10294e-05	7.22908e-05	6.899e-05	6.74648e-05
Neuron_338	0.000387932	0.000351162	0.000354809	0.000243758	0.000209426	0.000173523	0.000151569	0.000146244	0.000117756	0.000121049	0.00012849	0.000116253	0.000104827	0.000120822	0.000133514	0.000103687	0.000106776	9.46856e-05	9.97595e-05	9.73475e-05	0.000100082	0.000100444	8.19137e-05	8.39841e-05	8.69367e-05	8.03835e-05	8.67062e-05	8.6216e-05	8.89508e-05	8.38896e-05	8.33227e-05	9.01517e-05	8.02631e-05	7.18634e-05	6.43143e-05	8.22504e-05	7.95469e-05	7.98475e-05	8.64649e-05	6.55432e-05	8.4469e-05	6.4885e-05	6.86123e-05	6.95734e-05	7.96806e-05	6.14757e-05	5.97217e-05	5.99653e-05	5.87032e-05
Neuron_339	0.000680104	0.00058597	0.000536344	0.000452218	0.000399714	0.000391272	0.000327655	0.00031037	0.000263572	0.000277517	0.000277307	0.000259769	0.00023251	0.000256981	0.000277808	0.000260858	0.000256152	0.00021844	0.000225443	0.00022218	0.000210462	0.000211379	0.000198901	0.000199834	0.000237017	0.000193242	0.000200328	0.000169409	0.000206981	0.000173787	0.000196366	0.000205483	0.000167318	0.00018528	0.000171172	0.000183574	0.000151323	0.000165684	0.000171187	0.00015282	0.000180776	0.000200242	0.0001757	0.000148384	0.000150418	0.000153861	0.0001454	0.000152565	0.000150978
Neuron_340	0.00047658	0.000397567	0.000310377	0.000222031	0.000188822	0.000157572	0.000134837	0.000136032	0.000110121	0.000100722	0.000101857	9.87827e-05	8.43991e-05	9.59476e-05	9.83972e-05	9.8014e-05	8.65975e-05	7.86818e-05	8.55993e-05	8.66416e-05	8.48266e-05	9.2814e-05	7.17242e-05	7.14739e-05	8.392e-05	7.11775e-05	8.2918e-05	6.42201e-05	6.85773e-05	6.97205e-05	7.08486e-05	7.28058e-05	7.13851e-05	5.76508e-05	5.94222e-05	7.13168e-05	6.28863e-05	6.06218e-05	7.11963e-05	5.91689e-05	6.55057e-05	5.47435e-05	5.9739e-05	6.4527e-05	6.58277e-05	4.98037e-05	4.68138e-05	6.05195e-05	5.14042e-05
Neuron_341	0.00031511	0.000278145	0.000262234	0.000215382	0.000171647	0.000163033	0.000140079	0.000144674	0.000113947	0.000101917	0.000123399	0.000103335	8.25167e-05	8.54465e-05	8.92128e-05	0.000102751	9.43569e-05	9.46291e-05	9.04654e-05	8.44064e-05	7.20554e-05	7.6673e-05	7.15642e-05	7.2268e-05	0.000107303	8.42418e-05	9.91888e-05	7.74554e-05	7.99332e-05	7.21049e-05	6.498e-05	8.20298e-05	6.83095e-05	6.26482e-05	8.04353e-05	7.55842e-05	6.28871e-05	5.33171e-05	7.16045e-05	5.82328e-05	7.33319e-05	7.97574e-05	7.32445e-05	5.64733e-05	6.21455e-05	5.2349e-05	5.40397e-05	6.2502e-05	6.44496e-05
Neuron_342	0.000380684	0.000417231	0.00035495	0.000273116	0.00021236	0.000194198	0.000154761	0.000160467	0.000136606	0.000112854	0.000133973	0.000123296	0.000101671	0.000106389	0.00013266	0.000119296	0.000100552	0.000102568	0.000105827	0.000100698	8.98783e-05	8.9632e-05	8.87557e-05	8.53383e-05	0.000107701	9.37433e-05	0.000101976	8.92629e-05	8.40114e-05	8.19515e-05	7.44085e-05	9.27549e-05	8.51684e-05	7.49269e-05	8.30067e-05	8.50556e-05	7.63521e-05	6.17652e-05	8.55049e-05	6.93074e-05	8.48568e-05	7.85774e-05	7.37751e-05	6.28117e-05	6.94848e-05	6.1521e-05	5.38053e-05	6.9681e-05	6.89742e-05
Neuron_343	0.00110906	0.00108854	0.00100315	0.000737766	0.000629498	0.000566021	0.000478948	0.000455753	0.00040704	0.000367314	0.000427612	0.000369226	0.000325117	0.000360098	0.000415059	0.00035513	0.000342662	0.000305309	0.000328787	0.000328075	0.000288096	0.00030619	0.000286019	0.00027416	0.00030827	0.000290205	0.000305589	0.000274713	0.000281135	0.000261316	0.000251568	0.000296404	0.0002741	0.000256259	0.000259548	0.000259324	0.000256089	0.000218603	0.000263438	0.000211427	0.00028179	0.000256331	0.000237728	0.000205492	0.000224418	0.000209359	0.000183952	0.000206288	0.000202684
Neuron_344	0.000412259	0.00037259	0.000359261	0.000314765	0.000319237	0.000283556	0.000244289	0.000236217	0.000204174	0.00020513	0.000218349	0.000185665	0.000175044	0.000185703	0.000201674	0.00019824	0.000187387	0.000168968	0.000165942	0.000175937	0.000153891	0.000168118	0.000151349	0.000152464	0.000170317	0.000156201	0.000169805	0.000135944	0.000158148	0.000145032	0.000141137	0.000170465	0.00016065	0.000151229	0.000148379	0.000142056	0.000137051	0.000126352	0.00012639	0.00013482	0.00014265	0.000149907	0.000146017	0.000108579	0.000117557	0.000126349	0.000112394	0.000111891	0.000109895
Neuron_345	0.00047381	0.000440317	0.000399208	0.000289261	0.000231116	0.000195815	0.000163882	0.000148781	0.000132378	0.000132271	0.000131958	0.000116744	0.000109358	0.00011981	0.000131349	0.00011367	9.73613e-05	8.86563e-05	9.69593e-05	0.000106823	0.000102453	9.77166e-05	8.66239e-05	8.58254e-05	9.25183e-05	7.99543e-05	9.64165e-05	6.88666e-05	7.50466e-05	8.01016e-05	9.07967e-05	8.43303e-05	7.57103e-05	7.31336e-05	6.11436e-05	7.93222e-05	6.83897e-05	7.47594e-05	7.76681e-05	6.08566e-05	7.79292e-05	6.92335e-05	6.88642e-05	6.52754e-05	6.5747e-05	5.9032e-05	5.15152e-05	6.66659e-05	5.45376e-05
Neuron_346	0.000336081	0.000351804	0.000288017	0.000222763	0.00018203	0.000164751	0.000123028	0.000120426	0.000116963	9.79715e-05	0.000120214	0.000103577	9.23335e-05	0.000104645	0.000139835	0.00010396	9.09561e-05	7.8218e-05	9.04185e-05	9.12173e-05	8.14375e-05	8.25994e-05	8.43478e-05	8.08285e-05	7.93839e-05	7.88848e-05	8.04738e-05	7.30399e-05	7.5583e-05	7.27324e-05	7.76918e-05	9.11445e-05	7.78151e-05	7.40887e-05	6.88978e-05	6.93793e-05	6.83646e-05	6.2362e-05	6.74937e-05	6.24931e-05	7.65904e-05	6.82393e-05	6.02657e-05	4.99948e-05	5.67946e-05	6.17025e-05	4.52924e-05	5.80404e-05	5.76248e-05
Neuron_347	0.000464231	0.000440685	0.00040507	0.000295544	0.000233716	0.000209179	0.000191249	0.000169016	0.000150031	0.000144572	0.000149058	0.000136491	0.000122729	0.000148805	0.000163208	0.000130434	0.000122021	0.000104105	0.000119579	0.000118132	0.000113993	0.000116215	0.000108268	9.98997e-05	0.000115253	9.83654e-05	0.000105674	9.20879e-05	0.000101284	9.27092e-05	0.000102356	0.000109135	9.17298e-05	8.51517e-05	7.8858e-05	8.55097e-05	8.582e-05	8.12567e-05	9.54987e-05	6.97252e-05	0.000105075	8.97242e-05	8.33885e-05	8.01152e-05	8.37296e-05	7.1168e-05	6.5889e-05	7.55471e-05	7.33396e-05
Neuron_348	0.000679449	0.000550089	0.00053336	0.000411597	0.000378651	0.000356912	0.00031096	0.000287839	0.000232054	0.000259633	0.000237546	0.000223302	0.000198583	0.000227069	0.000209716	0.000222294	0.000216568	0.000207237	0.000197681	0.000206494	0.00019075	0.000198188	0.000157382	0.000169743	0.000209353	0.000185675	0.000191042	0.000160097	0.000183389	0.00016303	0.000142381	0.00018821	0.000159568	0.000146677	0.000151953	0.000168203	0.000152367	0.000148225	0.000162495	0.00015052	0.000158552	0.000174648	0.000168119	0.000143485	0.000153705	0.000122806	0.000136943	0.000128088	0.000119072
Neuron_349	0.000439504	0.00039714	0.000350306	0.000269799	0.000218868	0.000214301	0.000179818	0.00017914	0.000147866	0.000146376	0.000148272	0.000133967	0.000113637	0.000118967	0.000130537	0.000141512	0.000125918	0.000119635	0.000117563	0.00011574	0.000102434	0.00010034	0.000101905	0.00010219	0.000129713	0.000110192	0.000117622	9.71847e-05	0.000104588	9.55713e-05	8.74435e-05	0.000109357	8.83307e-05	8.64595e-05	9.72733e-05	9.96712e-05	8.27294e-05	7.84545e-05	8.99298e-05	8.31055e-05	9.4782e-05	0.000103677	9.39582e-05	7.31358e-05	7.97286e-05	7.20463e-05	7.42834e-05	8.19614e-05	7.58236e-05
Neuron_350	0.000611739	0.000504706	0.000450847	0.000319009	0.000283238	0.000238792	0.000209721	0.000186253	0.000152553	0.000165247	0.00014737	0.000132666	0.000135998	0.000132963	0.000122278	0.00014115	0.000113082	0.000110386	0.000109619	0.000135226	0.00012095	0.000119669	9.72291e-05	0.000100157	0.000104757	0.000104397	0.000117154	8.44635e-05	9.2574e-05	9.67265e-05	9.24254e-05	9.935e-05	0.000100127	9.31203e-05	8.75246e-05	9.23241e-05	8.40485e-05	8.90867e-05	8.17974e-05	8.88797e-05	8.70922e-05	8.8287e-05	8.99358e-05	7.69002e-05	7.40844e-05	7.77312e-05	6.8842e-05	7.18065e-05	6.27743e-05
Neuron_351	0.00078467	0.000811366	0.000651147	0.000416043	0.000346421	0.000306076	0.000256922	0.000261972	0.000214841	0.000210945	0.000213992	0.000192688	0.000168112	0.00018778	0.000212864	0.000180642	0.000165533	0.000158884	0.000166483	0.000168698	0.000156124	0.000173109	0.00014111	0.000137502	0.000152561	0.000135447	0.000154392	0.000139129	0.00013599	0.000139006	0.000130237	0.000146093	0.000139067	0.000116792	0.000112648	0.00012832	0.000127187	0.000114828	0.00012977	0.00011931	0.000136043	0.000122128	0.000122726	0.000112522	0.000119203	9.51754e-05	9.45749e-05	0.000102038	9.40048e-05
Neuron_352	0.000511705	0.00042295	0.000385171	0.000329887	0.000305407	0.000274585	0.000247213	0.000223401	0.000198272	0.000216945	0.000205941	0.000186263	0.000172525	0.00018905	0.000184592	0.0001786	0.000175321	0.000153409	0.000162233	0.000165606	0.000159533	0.000154628	0.000139348	0.000140948	0.000159514	0.00014493	0.000154492	0.000115506	0.000140283	0.000133796	0.000147424	0.000147995	0.000135017	0.000131927	0.000114306	0.000135717	0.000118755	0.000127685	0.000122118	0.000114134	0.000137667	0.000142493	0.000134906	0.000109697	0.000109002	0.000110552	0.000105835	0.000111477	0.000103081
Neuron_353	0.000504125	0.000498807	0.000439541	0.000332086	0.000265699	0.000235483	0.000187846	0.000180432	0.000149358	0.000136882	0.000155868	0.000125026	0.000113813	0.000115712	0.000124155	0.000142755	0.000109724	0.000111049	0.000108537	0.000113974	0.000102213	0.000102592	8.57455e-05	9.24667e-05	0.00012591	9.8141e-05	0.000118302	9.01801e-05	8.92314e-05	8.53233e-05	8.46683e-05	0.000103891	9.23062e-05	8.56521e-05	8.75884e-05	8.47918e-05	8.22827e-05	7.73467e-05	8.35392e-05	7.95537e-05	8.74818e-05	8.53484e-05	8.19274e-05	6.81339e-05	7.51429e-05	6.86215e-05	6.47511e-05	7.11069e-05	7.03002e-05
Neuron_354	0.000479332	0.000424633	0.000380223	0.00027335	0.000264289	0.000231432	0.000208443	0.000195529	0.000159149	0.000168663	0.000165858	0.000143332	0.000135937	0.000144125	0.000149937	0.000147476	0.000134594	0.000123669	0.000124508	0.000137563	0.000123955	0.000133752	0.000111451	0.000108952	0.000125587	0.000110578	0.000126309	0.000103758	0.000110812	0.000108031	0.000103782	0.000119695	0.000116984	0.00010724	0.00010154	0.000101512	0.000103795	9.8382e-05	9.31647e-05	9.82295e-05	0.000103837	9.95946e-05	0.000102972	8.66178e-05	8.91217e-05	9.00557e-05	7.98935e-05	8.03557e-05	7.77478e-05
Neuron_355	0.000533213	0.000456907	0.000446088	0.000358757	0.000325648	0.000291611	0.000250329	0.000237821	0.00020683	0.000217131	0.000212427	0.000190447	0.000165731	0.000177285	0.000170216	0.000189862	0.000178101	0.000179945	0.000168511	0.000169581	0.000155248	0.000165137	0.000133662	0.000144926	0.000176554	0.000154338	0.000176593	0.000130942	0.00015338	0.000143202	0.000124996	0.000160463	0.000144514	0.000132954	0.000140669	0.000136238	0.000125911	0.000116059	0.000126091	0.000130092	0.000134978	0.000163429	0.000150311	0.000109096	0.00011788	0.000108025	0.000114106	0.000109978	0.00010067
Neuron_356	0.000455966	0.000439406	0.000367373	0.000260948	0.000218719	0.000197591	0.000172195	0.000159207	0.00013311	0.000138947	0.00012396	0.000115593	0.00011204	0.000116187	0.00011236	0.000113118	9.91167e-05	9.71997e-05	9.89368e-05	0.000104574	9.82441e-05	0.000103565	8.74214e-05	8.39486e-05	9.55138e-05	9.09581e-05	9.42929e-05	7.70966e-05	8.32676e-05	8.51842e-05	7.84437e-05	9.21422e-05	8.51374e-05	7.48695e-05	7.372e-05	7.32034e-05	7.36704e-05	6.68758e-05	7.05798e-05	7.44001e-05	8.33872e-05	8.48572e-05	8.22799e-05	6.76731e-05	6.35776e-05	6.19057e-05	6.10615e-05	5.91516e-05	5.72395e-05
Neuron_357	0.00035669	0.000337085	0.000304444	0.00020986	0.000153004	0.000121652	9.94265e-05	0.00010064	7.86328e-05	7.13646e-05	7.59437e-05	6.65894e-05	5.97327e-05	6.38938e-05	7.35471e-05	6.17376e-05	5.56761e-05	5.01644e-05	5.36183e-05	5.17981e-05	4.9834e-05	5.60001e-05	4.43931e-05	4.45811e-05	5.16615e-05	4.38838e-05	5.30434e-05	4.31218e-05	4.52267e-05	4.5539e-05	4.37004e-05	4.89731e-05	4.29148e-05	3.34458e-05	3.33622e-05	4.12702e-05	3.86131e-05	3.41112e-05	4.58764e-05	3.47634e-05	4.24792e-05	3.95284e-05	3.72917e-05	3.81797e-05	3.69376e-05	2.67372e-05	2.88595e-05	3.41685e-05	3.3226e-05
Neuron_358	0.000575189	0.000528371	0.000448048	0.000295886	0.000230303	0.000195992	0.000160688	0.000146777	0.000119108	0.000109549	0.000109868	9.30767e-05	8.77829e-05	9.14179e-05	0.000107744	0.000109411	7.01858e-05	7.18462e-05	7.68296e-05	9.1718e-05	7.83599e-05	7.86827e-05	6.72435e-05	6.33407e-05	7.6618e-05	6.68405e-05	8.00907e-05	6.13211e-05	5.20323e-05	5.89e-05	5.98131e-05	6.65048e-05	6.24297e-05	5.60336e-05	5.15071e-05	5.65904e-05	5.96235e-05	5.85779e-05	5.33014e-05	5.39864e-05	5.52625e-05	4.62764e-05	4.59232e-05	4.52933e-05	5.0283e-05	4.50956e-05	3.66919e-05	5.40279e-05	4.06215e-05
Neuron_359	0.000530278	0.000533049	0.000490382	0.000372494	0.000297009	0.000270001	0.000227114	0.00022356	0.000183338	0.000167592	0.000195783	0.000167488	0.000143058	0.000146704	0.00016584	0.000175325	0.000144496	0.000142194	0.00014438	0.000144428	0.000127979	0.000124262	0.000114585	0.000116468	0.000157094	0.000129335	0.000146866	0.000121512	0.000118954	0.00010994	0.000114392	0.000123825	0.000105676	0.000104266	0.000112759	0.000116135	0.000101146	9.83683e-05	0.000113275	9.28414e-05	0.000116313	0.000114613	0.000105441	8.86695e-05	9.54971e-05	8.70509e-05	8.06081e-05	0.000100867	9.30263e-05
Neuron_360	0.000258375	0.000240929	0.000214718	0.000168182	0.000156591	0.000132236	0.000116993	0.00010645	9.52796e-05	9.27093e-05	8.75746e-05	7.9307e-05	7.63938e-05	8.45113e-05	8.4271e-05	8.30353e-05	7.24261e-05	6.57608e-05	6.80478e-05	7.35034e-05	6.93676e-05	7.2624e-05	6.47998e-05	6.46222e-05	7.29769e-05	6.65146e-05	7.29777e-05	5.21183e-05	6.03714e-05	6.23635e-05	5.90936e-05	7.12885e-05	6.5603e-05	5.51886e-05	5.57708e-05	5.81859e-05	5.44198e-05	5.1032e-05	5.37387e-05	5.12427e-05	5.80415e-05	5.63896e-05	5.82436e-05	4.86143e-05	4.84575e-05	4.64335e-05	4.29352e-05	4.87598e-05	4.44592e-05
Neuron_361	0.000679214	0.000576063	0.000518163	0.000420001	0.000374639	0.000330607	0.000271894	0.000260701	0.000236437	0.000230225	0.00023131	0.000206469	0.000192679	0.000201144	0.000201673	0.000201971	0.000179424	0.000175886	0.000174731	0.000188164	0.000173229	0.000179244	0.000156669	0.000161179	0.000169445	0.000169673	0.000181415	0.000134564	0.000157061	0.000157245	0.000140095	0.000176314	0.000161059	0.000151071	0.000141986	0.000145559	0.00013112	0.000122997	0.000128738	0.000147289	0.000145902	0.000162067	0.000157693	0.000116805	0.000112143	0.000122694	0.000110606	0.00011188	0.000105898
Neuron_362	0.000540116	0.00055261	0.0004245	0.000345512	0.000303037	0.000295395	0.000215427	0.000219575	0.000181311	0.000169139	0.000189509	0.000160316	0.000149353	0.000156978	0.000172066	0.000179444	0.000156792	0.000144971	0.000143517	0.000139972	0.000131195	0.000134752	0.00012112	0.000127938	0.000160993	0.000136103	0.000143019	0.000116703	0.000131569	0.000119813	0.000114038	0.000154979	0.000126091	0.000111824	0.000119419	0.000130068	0.00011027	0.000102153	0.000119077	0.000106495	0.000123779	0.000122263	0.000118434	9.45898e-05	0.000106887	9.18085e-05	9.50662e-05	9.5108e-05	0.000100598
Neuron_363	0.000370307	0.000346717	0.00032315	0.000237894	0.00019621	0.000176985	0.000154427	0.000143496	0.000120551	0.000119216	0.000125955	0.000116377	0.000107181	0.000116328	0.00013085	0.000111693	0.000102403	9.16217e-05	9.76528e-05	0.00010026	9.40461e-05	9.18541e-05	8.34899e-05	7.94247e-05	9.02208e-05	7.9789e-05	8.78398e-05	8.02771e-05	8.50275e-05	7.71423e-05	8.47112e-05	8.13121e-05	7.40219e-05	7.58632e-05	7.00525e-05	7.67172e-05	7.11915e-05	7.6124e-05	7.91362e-05	6.15253e-05	8.29883e-05	7.12212e-05	6.68417e-05	6.26443e-05	6.99784e-05	6.50931e-05	5.64093e-05	6.1177e-05	5.84648e-05
Neuron_364	0.000568339	0.000567077	0.000481468	0.000397695	0.000310148	0.00028947	0.000231537	0.000235093	0.000214554	0.000178366	0.00021247	0.00020363	0.000166906	0.000179222	0.000226967	0.000182167	0.000168186	0.000161219	0.000174515	0.000161758	0.000143952	0.000141516	0.000146469	0.000138891	0.000162639	0.00014463	0.000153225	0.00013783	0.000141306	0.000132895	0.000132631	0.000145524	0.000129327	0.000129041	0.000130924	0.000137562	0.000115329	0.000106633	0.000135882	0.000108137	0.000138271	0.000130841	0.000116462	9.35902e-05	0.000107174	0.000105915	8.93301e-05	0.000108462	0.000110771
Neuron_365	0.000711211	0.000633244	0.000535419	0.000388301	0.000346476	0.000315499	0.000269065	0.00026257	0.000223772	0.000226276	0.000230073	0.000201152	0.000187616	0.000193617	0.000199314	0.000200054	0.000176536	0.000171235	0.000171313	0.000189238	0.000165483	0.000180765	0.000154816	0.000153759	0.000166494	0.000156666	0.000172861	0.000138322	0.000151212	0.000152569	0.000143687	0.000163379	0.000157869	0.000151069	0.000142576	0.000137813	0.00013272	0.000122707	0.000123823	0.000142586	0.000146229	0.000150586	0.000150873	0.000115434	0.000111307	0.000123871	0.000110078	0.00010851	0.000108236
Neuron_366	0.000550247	0.000483245	0.000424076	0.000319305	0.000305606	0.000256809	0.000228093	0.000215026	0.000184345	0.00018091	0.000190555	0.000164276	0.000164797	0.000166937	0.00018542	0.000171481	0.000157749	0.000134523	0.000143077	0.000165946	0.000138153	0.000149344	0.000140166	0.000134418	0.000137015	0.000133567	0.000148029	0.000115155	0.000130059	0.000125863	0.000128631	0.000138637	0.000139707	0.000132702	0.000128993	0.000122492	0.000118139	0.000112476	0.000108678	0.000115985	0.00012291	0.000114096	0.000118511	9.6288e-05	0.000100251	0.000113482	8.98735e-05	9.53761e-05	9.34016e-05
Neuron_367	0.0004923	0.000479257	0.000403162	0.000312586	0.00025415	0.000240407	0.000199949	0.000205619	0.000169441	0.000162704	0.00018712	0.00016277	0.000141879	0.000147734	0.000150504	0.000163958	0.000149169	0.000147418	0.000144842	0.000143597	0.000127355	0.000125734	0.000120612	0.000121925	0.00015889	0.000130332	0.000148848	0.000114802	0.000125919	0.000114248	0.00011411	0.000126965	0.000112743	0.00010606	0.000112499	0.000124739	9.68617e-05	9.29823e-05	0.000117107	9.85641e-05	0.000121836	0.000122873	0.000116231	9.32412e-05	9.80743e-05	8.92409e-05	8.9213e-05	9.81572e-05	0.000102427
Neuron_368	0.000648985	0.000708526	0.00057595	0.000407361	0.000313412	0.000283112	0.000237924	0.000242014	0.000199739	0.000171969	0.000195372	0.000166042	0.00014845	0.000151409	0.000170551	0.000174407	0.000148628	0.000139027	0.000142988	0.000142166	0.000124845	0.000128478	0.000125694	0.000122098	0.000153537	0.000138781	0.00015103	0.000113778	0.000124475	0.000121259	0.000112533	0.000138708	0.000114207	9.64034e-05	0.000115701	0.000116627	0.00010367	8.6522e-05	0.000113212	8.9445e-05	0.000119178	0.000118372	0.000107786	8.70306e-05	9.60009e-05	7.8863e-05	7.96129e-05	9.80671e-05	9.33448e-05
Neuron_369	0.000289104	0.000305725	0.000243511	0.000170406	0.000131536	0.000120206	9.64112e-05	9.91463e-05	8.05796e-05	6.90485e-05	7.78102e-05	7.06656e-05	5.89261e-05	6.41368e-05	7.54822e-05	7.03748e-05	6.08858e-05	6.02043e-05	6.14712e-05	6.13665e-05	5.86386e-05	5.9401e-05	4.89869e-05	4.83567e-05	5.97911e-05	5.20044e-05	5.88217e-05	4.99683e-05	5.13141e-05	4.789e-05	4.33672e-05	5.15807e-05	4.64431e-05	3.99479e-05	4.26845e-05	5.15242e-05	4.58242e-05	3.91827e-05	5.70148e-05	3.91341e-05	4.98579e-05	4.52194e-05	3.92334e-05	4.26298e-05	4.75026e-05	3.21475e-05	3.34819e-05	4.24021e-05	3.75311e-05
Neuron_370	0.000282563	0.00025618	0.000245874	0.000171023	0.000126603	0.000108168	8.76237e-05	8.90334e-05	6.99352e-05	6.72701e-05	6.75076e-05	6.19443e-05	5.41736e-05	6.49591e-05	6.08396e-05	5.8199e-05	5.44939e-05	5.42665e-05	5.44561e-05	5.3196e-05	5.275e-05	5.58577e-05	4.73199e-05	4.63793e-05	6.06802e-05	5.21446e-05	5.62927e-05	4.27396e-05	4.53908e-05	4.70048e-05	3.98186e-05	4.80452e-05	4.20659e-05	3.32449e-05	3.77959e-05	4.66896e-05	3.74523e-05	3.67209e-05	4.94519e-05	3.62681e-05	4.34503e-05	4.02349e-05	4.27228e-05	4.03262e-05	4.35352e-05	2.80327e-05	3.24328e-05	3.84682e-05	3.49262e-05
Neuron_371	0.000583895	0.000573188	0.000507373	0.000336752	0.000266763	0.000232433	0.000194939	0.000181101	0.000153756	0.000150495	0.000153525	0.000136591	0.000115952	0.000135851	0.00015379	0.000129295	0.000113479	0.000105769	0.000115975	0.000118882	0.000120656	0.000122779	9.64275e-05	9.63481e-05	0.000104742	9.24757e-05	0.000103051	9.23115e-05	9.0606e-05	8.93007e-05	9.47098e-05	9.92446e-05	8.8934e-05	8.22641e-05	6.7186e-05	8.31034e-05	8.66561e-05	7.94651e-05	9.55792e-05	7.64106e-05	9.54719e-05	8.02012e-05	7.55966e-05	8.42044e-05	8.36382e-05	6.38535e-05	6.39766e-05	6.97011e-05	6.41226e-05
Neuron_372	0.000311608	0.000334625	0.000282786	0.000202595	0.000166868	0.000142321	0.000112916	0.000109398	9.33328e-05	8.52141e-05	9.16826e-05	8.02431e-05	7.4194e-05	7.8491e-05	9.36444e-05	8.52335e-05	7.22243e-05	6.4805e-05	6.94355e-05	6.86327e-05	7.03273e-05	7.42816e-05	5.96005e-05	6.2224e-05	6.77909e-05	6.0387e-05	7.16057e-05	5.34896e-05	5.86645e-05	5.93914e-05	6.08852e-05	7.03682e-05	6.26031e-05	4.99938e-05	4.88419e-05	5.8258e-05	5.48129e-05	5.04454e-05	5.68958e-05	4.8804e-05	5.68344e-05	4.83052e-05	4.89134e-05	4.93312e-05	5.13341e-05	4.11604e-05	3.8633e-05	4.96012e-05	4.30263e-05
Neuron_373	0.000384686	0.00037836	0.000332951	0.000256991	0.000230361	0.000198702	0.00018098	0.000171346	0.0001514	0.000142596	0.000149756	0.000131914	0.000120682	0.000128455	0.000136408	0.000132542	0.000124298	0.000111053	0.000115803	0.000121264	0.00010691	0.000115771	0.00010462	0.000103196	0.000115742	0.000106646	0.000118571	9.17886e-05	0.000102887	9.88147e-05	0.000100139	0.000109326	0.000104687	9.44391e-05	9.72411e-05	9.58966e-05	9.0097e-05	8.38244e-05	8.96461e-05	8.40164e-05	9.85937e-05	9.7465e-05	9.45236e-05	7.78477e-05	8.05738e-05	7.97216e-05	7.24098e-05	8.0919e-05	7.49613e-05
Neuron_374	0.000501073	0.000419695	0.000357978	0.0002788	0.000241856	0.000194325	0.00017952	0.00016858	0.000142935	0.000134749	0.000134449	0.000125606	0.000122728	0.000132874	0.000128614	0.000121298	0.000113351	9.71801e-05	0.000109877	0.000117369	0.00010373	0.000114027	0.000104395	9.44563e-05	0.00010899	9.78004e-05	0.000110552	7.67429e-05	9.18497e-05	9.50561e-05	9.61242e-05	9.62892e-05	9.94269e-05	8.24006e-05	8.27531e-05	9.09101e-05	8.24703e-05	7.99095e-05	8.71219e-05	7.59348e-05	9.04134e-05	7.94615e-05	8.65406e-05	7.79983e-05	7.81802e-05	7.26455e-05	6.31419e-05	7.45732e-05	6.89344e-05
Neuron_375	0.000419982	0.000410605	0.000342497	0.000279466	0.000218441	0.000209094	0.000161991	0.000164088	0.000140742	0.000140332	0.000142352	0.000122355	0.000114686	0.00012013	0.000146846	0.000134061	0.000115116	9.6786e-05	0.000104214	0.00011034	0.000100857	9.21443e-05	9.66133e-05	9.71823e-05	0.000102252	9.31636e-05	9.92689e-05	8.38597e-05	9.26687e-05	8.69984e-05	0.000100188	0.00010568	8.51727e-05	8.45012e-05	7.65375e-05	9.14089e-05	7.47036e-05	7.98052e-05	8.34048e-05	7.12867e-05	9.40544e-05	9.10477e-05	7.84361e-05	6.48632e-05	6.77252e-05	7.0546e-05	6.50157e-05	7.26022e-05	7.33063e-05
Neuron_376	0.000765861	0.000605748	0.000555556	0.000463673	0.00043877	0.000374682	0.000329073	0.000314555	0.000269573	0.000261277	0.000277362	0.000242097	0.000244893	0.000253102	0.00027471	0.000248722	0.000234927	0.000199721	0.000208421	0.000235596	0.000199941	0.000215059	0.000209144	0.000200611	0.000208506	0.000209083	0.00022106	0.000165103	0.000201059	0.000189284	0.000184399	0.000219649	0.000207426	0.000190268	0.000187253	0.000181297	0.000169869	0.000157553	0.000157043	0.000172392	0.000183793	0.000178402	0.000186566	0.00013859	0.000144224	0.000163294	0.000135071	0.000140999	0.000139842
Neuron_377	0.000613941	0.000573882	0.000494732	0.000333842	0.000301277	0.00026279	0.000241973	0.000225818	0.000184875	0.000192117	0.000179626	0.000164125	0.000147767	0.000168282	0.000172082	0.000162513	0.000152178	0.000140654	0.000144701	0.000151003	0.000144351	0.000159882	0.000123331	0.000121715	0.000142227	0.000120879	0.000140755	0.00012027	0.000122797	0.000123399	0.000118735	0.000131878	0.000127302	0.000105207	0.000102923	0.000120689	0.000119343	0.000112004	0.000117012	0.000104737	0.000120124	0.000105768	0.000113874	0.000109127	0.000112771	8.84825e-05	8.90504e-05	9.84185e-05	8.37026e-05
Neuron_378	0.00052871	0.00049221	0.00045205	0.000341007	0.000312273	0.000275255	0.000251257	0.000234334	0.000199916	0.000201691	0.000198029	0.000180485	0.000168567	0.000186628	0.000176519	0.000177143	0.000167098	0.00015724	0.000158364	0.000168081	0.000155885	0.000163823	0.000140546	0.000138553	0.000160868	0.000152323	0.000162325	0.000122687	0.000141277	0.00013963	0.000126189	0.000147527	0.000142001	0.000125775	0.000123587	0.000134502	0.00012166	0.000112176	0.000130148	0.000115396	0.000136846	0.000138997	0.000134791	0.000112315	0.000111338	0.000103213	0.000100421	0.000104524	0.00010246
Neuron_379	0.000415966	0.000415347	0.000403393	0.00029476	0.000245896	0.000217632	0.000186937	0.000172759	0.000153877	0.000142223	0.000164548	0.000146289	0.0001232	0.000145259	0.000169126	0.000136269	0.00013112	0.000117092	0.000129726	0.000125237	0.000115517	0.000122109	0.000108972	0.000107555	0.000121762	0.000106337	0.000118384	0.00010507	0.000106996	0.000101232	0.000104293	0.000118778	0.000105587	9.63216e-05	9.3993e-05	9.54589e-05	9.91497e-05	8.58041e-05	0.000102481	8.01772e-05	0.000109543	9.56739e-05	9.01392e-05	8.1924e-05	8.98118e-05	7.95552e-05	6.77103e-05	8.10842e-05	7.84122e-05
Neuron_380	0.000771157	0.00056868	0.00051665	0.000383639	0.000301613	0.000278264	0.000227132	0.000226466	0.000184198	0.000178658	0.000184863	0.000163055	0.00014456	0.000146939	0.000157071	0.000155913	0.000135919	0.000135984	0.000136927	0.000149547	0.000127012	0.000132104	0.000123824	0.000121565	0.000131855	0.00012274	0.000146367	0.000115218	0.000117289	0.000120943	0.00011226	0.000122567	0.000119921	0.000112412	0.000114252	0.000108675	9.77322e-05	8.53014e-05	0.000101712	0.000102219	0.000116654	0.000115419	0.000113292	8.65867e-05	8.5304e-05	9.20157e-05	7.87716e-05	8.6024e-05	8.65746e-05
Neuron_381	0.000530437	0.000437362	0.000403477	0.000302133	0.000278272	0.000253985	0.00021107	0.000202547	0.00017289	0.000186574	0.000175947	0.000150783	0.000144644	0.000148942	0.00014267	0.0001577	0.000138724	0.000141207	0.000128721	0.000144602	0.00013484	0.000139575	0.000118224	0.000121603	0.000133358	0.000128759	0.000143233	0.000100679	0.000118909	0.000124289	0.000107456	0.000135412	0.000121093	0.000114652	0.000114576	0.000113209	9.94478e-05	9.75881e-05	9.67399e-05	0.000112284	0.000108287	0.000129913	0.000121143	8.9498e-05	8.81042e-05	9.32801e-05	9.0455e-05	8.75844e-05	8.554e-05
Neuron_382	0.000649083	0.000532909	0.000519703	0.000342672	0.000267302	0.000236799	0.000211496	0.000193396	0.000144844	0.000148749	0.000140979	0.000128437	0.000122216	0.000157246	0.000153676	0.000116578	0.000124439	0.000108596	0.000108837	0.000111498	0.000123711	0.000125582	0.000100291	9.7126e-05	0.000104232	0.000100186	9.73492e-05	9.58169e-05	0.000103409	9.38322e-05	9.31036e-05	9.92583e-05	8.44612e-05	6.82256e-05	5.9345e-05	9.35696e-05	8.53547e-05	8.08165e-05	0.000111112	6.3386e-05	0.00010211	6.73311e-05	8.0714e-05	9.56191e-05	9.67957e-05	5.57811e-05	6.99224e-05	6.92625e-05	6.32699e-05
Neuron_383	0.000350147	0.00033255	0.000305639	0.00022792	0.000182977	0.000165525	0.00012556	0.000129326	0.000108632	9.84373e-05	0.000118652	9.86526e-05	8.91078e-05	9.04643e-05	0.000105271	8.96278e-05	8.4541e-05	8.32415e-05	8.45401e-05	8.43621e-05	7.49469e-05	8.329e-05	7.06066e-05	6.9117e-05	7.99821e-05	6.88697e-05	8.91374e-05	6.70045e-05	7.17001e-05	6.98148e-05	6.49984e-05	7.76576e-05	7.39464e-05	6.67407e-05	6.03642e-05	6.60459e-05	6.26816e-05	5.19836e-05	6.50657e-05	6.38649e-05	6.79874e-05	6.56651e-05	6.74199e-05	5.49239e-05	5.48175e-05	5.45097e-05	4.93529e-05	5.14967e-05	5.24363e-05
Neuron_384	0.000457739	0.000415509	0.000363492	0.000282911	0.000249158	0.000238652	0.000194383	0.000192424	0.000163483	0.000167338	0.000179315	0.000154068	0.000131163	0.00014396	0.000146774	0.000156971	0.000149587	0.000145147	0.000138811	0.000140019	0.000122517	0.000126671	0.000115539	0.000121275	0.000153153	0.000124263	0.000141597	0.00011029	0.000126128	0.000110494	0.000100523	0.000126163	0.00010944	0.000112342	0.000112624	0.000117854	0.000100032	9.55591e-05	0.000111509	0.000107617	0.000113575	0.000128592	0.000117699	9.06922e-05	0.000101235	9.11402e-05	9.49547e-05	9.05723e-05	8.8239e-05
Neuron_385	0.00046043	0.000425085	0.000386972	0.000303917	0.000293889	0.000262113	0.000230406	0.000217931	0.000184933	0.000192118	0.000189991	0.000175639	0.000158473	0.000181054	0.000172254	0.000170954	0.000170544	0.000160909	0.000156699	0.000155102	0.000150838	0.000164332	0.000128378	0.000136576	0.00016415	0.000143606	0.000153088	0.000122314	0.000145496	0.000133233	0.000121082	0.000151606	0.000136148	0.000115823	0.00012028	0.000135391	0.000121437	0.000116849	0.000129657	0.000116771	0.000128519	0.00013253	0.000134227	0.000115253	0.000122854	9.70258e-05	0.000105769	0.000102773	9.62814e-05
Neuron_386	0.00054609	0.000481134	0.000445272	0.000352419	0.000293577	0.000258232	0.000213119	0.000213102	0.000188214	0.000179636	0.000190521	0.000158144	0.000145303	0.000149252	0.000160141	0.000166186	0.000144803	0.000141101	0.000136319	0.000143337	0.000130912	0.000134159	0.000120336	0.00012807	0.000142958	0.000132168	0.000147235	0.000113854	0.000123405	0.00012307	0.000110271	0.000141444	0.00012507	0.000115267	0.00011319	0.000114033	0.000106641	9.79967e-05	0.000106129	0.000109111	0.00011479	0.000122765	0.000117686	8.91875e-05	9.22941e-05	9.25475e-05	8.96358e-05	8.98739e-05	9.14735e-05
Neuron_387	0.000335004	0.000269173	0.000225772	0.000164745	0.000123893	0.000108468	7.55726e-05	8.24746e-05	7.32074e-05	6.26937e-05	7.12876e-05	5.79599e-05	4.65397e-05	5.02395e-05	5.62689e-05	5.25567e-05	4.24403e-05	4.89444e-05	4.79625e-05	4.72168e-05	4.23838e-05	4.42397e-05	3.92441e-05	4.19571e-05	4.52608e-05	3.85258e-05	5.15795e-05	3.67418e-05	3.47625e-05	4.26918e-05	3.54545e-05	4.22622e-05	3.60044e-05	3.36394e-05	3.58464e-05	3.47111e-05	3.0638e-05	2.69736e-05	3.59401e-05	3.31874e-05	3.68335e-05	3.86273e-05	3.43472e-05	2.64591e-05	2.90025e-05	2.50444e-05	2.41432e-05	2.83309e-05	2.71487e-05
Neuron_388	0.000498371	0.000460917	0.00037838	0.000259477	0.000203429	0.000196532	0.000157718	0.000162828	0.000129648	0.000115827	0.000133322	0.000124019	9.3761e-05	0.000103287	0.000115938	0.000117766	9.95702e-05	0.000109098	0.000108521	9.79307e-05	9.2766e-05	9.77515e-05	8.66748e-05	8.69513e-05	0.000120936	8.66683e-05	0.000106207	9.15833e-05	8.23485e-05	8.5343e-05	7.70413e-05	9.51753e-05	8.09947e-05	7.20896e-05	8.62135e-05	8.46947e-05	7.27244e-05	5.71337e-05	8.82324e-05	7.03222e-05	8.68252e-05	8.20509e-05	7.73943e-05	7.00239e-05	7.30195e-05	5.82669e-05	5.63788e-05	6.77807e-05	7.37996e-05
Neuron_389	0.000528603	0.000446183	0.000440806	0.000292125	0.000220662	0.00020824	0.000193127	0.000170447	0.000133153	0.000136668	0.000133227	0.000121193	0.000106886	0.000131506	0.000130574	0.00011255	0.000109868	9.57128e-05	0.000103904	0.00010439	0.000102677	0.000104612	9.39389e-05	8.61518e-05	0.000107792	8.81686e-05	9.91193e-05	8.13271e-05	9.08089e-05	8.49812e-05	8.8752e-05	9.35373e-05	7.57116e-05	6.6768e-05	6.53585e-05	8.03735e-05	7.38792e-05	7.03221e-05	8.91706e-05	5.54107e-05	9.08112e-05	7.36349e-05	7.44206e-05	7.71412e-05	7.84027e-05	5.68213e-05	6.06108e-05	6.79041e-05	6.56213e-05
Neuron_390	0.000497794	0.000438441	0.000405122	0.000293431	0.000241885	0.000183381	0.000176128	0.000147079	0.000134504	0.000121318	0.000115696	0.000110482	9.8253e-05	0.000112439	0.000107778	0.000102198	8.67779e-05	7.90861e-05	9.46147e-05	9.90732e-05	9.44566e-05	0.000104046	8.46388e-05	7.87608e-05	9.7432e-05	7.66404e-05	9.91739e-05	6.21073e-05	6.43111e-05	8.10248e-05	8.48389e-05	7.87913e-05	8.51763e-05	6.5469e-05	6.20725e-05	7.03424e-05	7.30067e-05	6.73585e-05	6.93234e-05	5.89665e-05	7.25605e-05	5.36606e-05	6.73638e-05	6.9985e-05	6.57281e-05	5.62209e-05	4.41335e-05	6.87881e-05	5.19499e-05
Neuron_391	0.000447854	0.000375785	0.000341568	0.000222212	0.000172798	0.000148049	0.000138098	0.000126588	9.18062e-05	9.66973e-05	8.95481e-05	8.45615e-05	8.35744e-05	8.99382e-05	8.60599e-05	8.00154e-05	7.52373e-05	6.57073e-05	7.00529e-05	7.00163e-05	7.32183e-05	7.43486e-05	6.52624e-05	5.96698e-05	7.4456e-05	6.3829e-05	6.41885e-05	5.05028e-05	6.07645e-05	6.11058e-05	5.86999e-05	6.70002e-05	5.14152e-05	4.38916e-05	4.37164e-05	5.6812e-05	4.97442e-05	5.07691e-05	5.86893e-05	4.1005e-05	5.7089e-05	4.69443e-05	5.05622e-05	5.43403e-05	5.42233e-05	3.83178e-05	4.2637e-05	4.46029e-05	4.51109e-05
Neuron_392	0.000781606	0.000734987	0.000596714	0.000450522	0.000409684	0.000352294	0.000316278	0.000301542	0.000258988	0.000250803	0.000256759	0.000223719	0.000212734	0.000216351	0.00022231	0.000235699	0.000204361	0.000190122	0.000192966	0.000213404	0.000183534	0.000198883	0.000174858	0.00017199	0.000190649	0.000180221	0.000199971	0.000152644	0.000169937	0.000170066	0.000165155	0.000180871	0.000177665	0.00016296	0.000160503	0.000162345	0.000150919	0.000146032	0.000141723	0.00015049	0.000160115	0.000165904	0.000162793	0.000128316	0.00013142	0.000137211	0.000124516	0.000133779	0.000118752
Neuron_393	0.000665413	0.000578864	0.000492848	0.000372408	0.000280315	0.000242346	0.00017167	0.000184687	0.000162927	0.000144638	0.00014875	0.000124248	0.000115937	0.000115767	0.000149714	0.000131823	0.000105296	9.52588e-05	0.000101906	0.000111617	0.000107637	9.58859e-05	9.77721e-05	0.000105121	9.42564e-05	0.000102202	0.000110224	8.13227e-05	8.55797e-05	0.000102532	8.72328e-05	0.000112594	8.9004e-05	8.0947e-05	7.86214e-05	8.85552e-05	7.73882e-05	6.88323e-05	8.15375e-05	8.12981e-05	8.63312e-05	8.73355e-05	7.96592e-05	6.22069e-05	6.02711e-05	6.30899e-05	5.67106e-05	6.79854e-05	6.35212e-05
Neuron_394	0.000532213	0.00045681	0.000458144	0.00032029	0.000259514	0.000213541	0.000178882	0.000171899	0.00014214	0.000136354	0.000151129	0.000127598	0.00012401	0.00012653	0.000152582	0.0001195	0.000120316	0.00010418	0.000106949	0.00010826	0.000103415	0.000108675	9.72694e-05	9.69953e-05	9.74563e-05	9.29541e-05	0.000107407	9.27432e-05	9.92384e-05	9.35162e-05	9.23416e-05	0.000103674	9.86e-05	8.47727e-05	8.2917e-05	9.02914e-05	8.83726e-05	7.8289e-05	8.90949e-05	7.5285e-05	9.31155e-05	7.51368e-05	8.08126e-05	7.36732e-05	7.85578e-05	7.21861e-05	6.32855e-05	6.68359e-05	6.81935e-05
Neuron_395	0.000622295	0.000537237	0.000510944	0.000362225	0.000290081	0.000247674	0.000215907	0.000198455	0.000170355	0.000171316	0.000162374	0.000147196	0.000133921	0.000138567	0.000146094	0.000141398	0.000118095	0.00012022	0.000122915	0.000133087	0.00012494	0.000127494	0.000107236	0.000105009	0.000112042	0.000104807	0.000122124	9.65765e-05	0.000100624	0.000105196	9.40658e-05	0.000112859	0.000108851	9.68056e-05	8.81753e-05	8.71487e-05	9.40875e-05	7.93482e-05	8.78843e-05	9.41645e-05	9.95797e-05	0.000101275	9.74524e-05	8.26527e-05	7.69885e-05	7.77635e-05	6.9534e-05	7.10297e-05	6.67705e-05
Neuron_396	0.000396611	0.000376577	0.000319452	0.000246691	0.000211281	0.000175719	0.000143154	0.000143689	0.000127235	0.000114391	0.000118614	0.000101156	9.7871e-05	9.89431e-05	0.000123507	0.000114078	9.06767e-05	8.17067e-05	8.54379e-05	9.58919e-05	8.60844e-05	8.75591e-05	8.30618e-05	8.51827e-05	8.44674e-05	8.46957e-05	9.42136e-05	7.05175e-05	7.58977e-05	8.03121e-05	7.27145e-05	9.6106e-05	8.5969e-05	7.57254e-05	7.27166e-05	7.58639e-05	7.24071e-05	6.38129e-05	6.57088e-05	7.48809e-05	7.18501e-05	7.1723e-05	7.11137e-05	5.52944e-05	5.72865e-05	6.24125e-05	5.09687e-05	6.14185e-05	5.59246e-05
Neuron_397	0.000390402	0.000368554	0.000291894	0.000215676	0.000177184	0.000161877	0.000129903	0.00013889	0.000115788	9.72777e-05	0.000124431	0.000114003	0.000100457	0.000107162	0.000135573	0.000107143	0.000101281	8.96396e-05	0.000100415	9.68972e-05	8.53089e-05	9.37516e-05	8.72967e-05	8.26869e-05	8.94667e-05	7.84969e-05	8.91207e-05	7.73739e-05	8.25448e-05	7.67659e-05	7.86812e-05	8.38064e-05	7.78801e-05	7.53212e-05	7.35303e-05	7.70581e-05	6.91926e-05	6.65402e-05	7.84122e-05	6.85632e-05	7.83188e-05	6.81016e-05	6.52273e-05	6.16586e-05	7.00566e-05	6.61023e-05	5.30132e-05	6.22226e-05	6.06689e-05
Neuron_398	0.000606125	0.000435299	0.000405718	0.000314418	0.000258645	0.000234907	0.000198091	0.00019993	0.000159027	0.000146794	0.000162328	0.000143632	0.000123607	0.000127234	0.000138563	0.000149696	0.000126224	0.000128425	0.000126313	0.000128884	0.000112841	0.000115094	0.000106067	0.000106642	0.000132924	0.000113937	0.000127336	0.000111069	0.000106479	0.000102277	8.95502e-05	0.000110802	0.000103036	9.28421e-05	0.000103648	0.000111197	9.42457e-05	8.94037e-05	9.82476e-05	9.18939e-05	9.64382e-05	9.02033e-05	9.70491e-05	8.22268e-05	9.16846e-05	8.07234e-05	7.46623e-05	8.97521e-05	7.5496e-05
Neuron_399	0.000405048	0.000477241	0.000336694	0.000224946	0.000178948	0.000156967	0.000125092	0.000129558	0.00010279	9.33011e-05	8.88584e-05	7.69548e-05	6.69899e-05	7.19702e-05	9.35153e-05	9.66412e-05	6.49247e-05	6.25163e-05	6.42583e-05	7.10627e-05	6.94085e-05	6.86582e-05	5.94962e-05	5.85543e-05	6.82462e-05	5.70393e-05	6.7994e-05	5.66442e-05	4.97977e-05	5.87125e-05	5.32835e-05	6.97878e-05	5.83487e-05	4.46756e-05	4.92042e-05	5.59685e-05	5.32968e-05	4.55369e-05	5.45688e-05	4.73391e-05	5.0013e-05	4.50989e-05	4.08715e-05	4.38226e-05	4.56989e-05	3.51931e-05	3.4208e-05	4.6616e-05	4.27928e-05
Neuron_400	0.000455954	0.000415628	0.000367643	0.000276601	0.000232491	0.000206799	0.000177981	0.000167152	0.000151737	0.000148491	0.000145141	0.000132995	0.000114145	0.000130438	0.000124235	0.000122776	0.000114753	0.000117458	0.000116866	0.000114622	0.000110472	0.000117886	9.31755e-05	9.70483e-05	0.000117239	0.000100059	0.000113361	8.40452e-05	9.52478e-05	9.61875e-05	8.76777e-05	0.000101304	9.54623e-05	8.30478e-05	8.24325e-05	8.66188e-05	8.29229e-05	7.66225e-05	8.75759e-05	8.37295e-05	9.13681e-05	9.92811e-05	9.40729e-05	7.91553e-05	7.95494e-05	6.67498e-05	6.95907e-05	7.33517e-05	6.61091e-05
Neuron_401	0.000564979	0.000477608	0.000471517	0.000349368	0.000282565	0.000254961	0.00023424	0.000214603	0.00017003	0.000178846	0.000179164	0.000155567	0.000148669	0.000151501	0.000148434	0.000162814	0.000136306	0.000129836	0.000134483	0.000149615	0.000132032	0.000121657	0.000115323	0.000110049	0.000140225	0.000124037	0.000136284	0.000104129	0.000110415	0.000105328	0.000110183	0.00011456	0.000109472	0.000102085	9.71034e-05	0.000111545	9.80746e-05	0.000103339	9.98549e-05	8.94205e-05	0.000110372	0.000107004	0.000103569	8.81736e-05	9.03318e-05	8.73738e-05	8.00015e-05	9.20846e-05	8.57097e-05
Neuron_402	0.000433275	0.000401305	0.000357872	0.000290114	0.000238738	0.000225124	0.000182829	0.000178184	0.00015926	0.000141011	0.000172722	0.000148684	0.000122237	0.000135815	0.000154407	0.000143571	0.000134248	0.000127344	0.00013362	0.000125314	0.00010946	0.000116116	0.000105584	0.000108141	0.000140537	0.000112906	0.000130382	0.000107118	0.000112538	0.000100955	0.000106612	0.000125142	0.000106077	0.000101021	0.000102929	0.000109665	9.63094e-05	9.02879e-05	0.000105658	8.35017e-05	0.000111645	0.000107101	0.000101696	8.0511e-05	9.20214e-05	8.47778e-05	7.63301e-05	8.94195e-05	8.95186e-05
Neuron_403	0.000290423	0.000262592	0.000235337	0.000191652	0.000163581	0.00014883	0.000125748	0.000116318	9.73305e-05	0.00010238	0.00010063	9.22116e-05	8.67524e-05	9.23811e-05	9.71149e-05	9.12862e-05	8.56785e-05	7.50328e-05	7.88795e-05	8.03797e-05	7.64024e-05	6.96861e-05	6.9921e-05	6.91429e-05	8.15642e-05	7.13007e-05	7.49387e-05	6.00554e-05	6.80917e-05	6.37606e-05	6.83086e-05	7.13239e-05	6.11865e-05	6.39393e-05	5.88987e-05	6.5428e-05	5.60156e-05	5.94373e-05	6.22303e-05	5.16037e-05	6.64737e-05	6.64104e-05	6.07749e-05	4.9493e-05	5.19113e-05	5.27797e-05	4.97315e-05	5.07656e-05	5.26553e-05
Neuron_404	0.000295363	0.000321414	0.000335474	0.000238621	0.000194568	0.000183176	0.000158731	0.000159397	0.000129483	0.000134755	0.000150029	0.000139735	0.000118736	0.000138786	0.000151606	0.000118641	0.000130162	0.000117068	0.000122019	0.000114148	0.000113332	0.000109901	9.62073e-05	9.73235e-05	0.000109757	9.85333e-05	0.000103722	0.000101446	0.00011072	9.24565e-05	9.9966e-05	9.73774e-05	8.52479e-05	8.52973e-05	7.66531e-05	0.000103125	8.54407e-05	8.8052e-05	0.000108845	7.31466e-05	0.000104808	9.2354e-05	8.24294e-05	8.42764e-05	9.32131e-05	7.25739e-05	7.42329e-05	7.50866e-05	7.57016e-05
Neuron_405	0.000537457	0.000475603	0.000441137	0.00034667	0.000320745	0.000289909	0.000240949	0.000234061	0.000203335	0.000217469	0.000214168	0.00018406	0.000176285	0.000187846	0.000188863	0.00018143	0.000170323	0.000167252	0.00016056	0.000175152	0.000165111	0.000162163	0.000144143	0.000147917	0.000159836	0.000157329	0.000167235	0.000123887	0.000145409	0.00014776	0.000134455	0.000158208	0.000147517	0.000141528	0.000128413	0.000141783	0.000123117	0.000122296	0.000124883	0.000132645	0.000141059	0.000157382	0.000144714	0.000110113	0.000108668	0.000115379	0.000108295	0.000106882	0.000105049
Neuron_406	0.000703016	0.000633904	0.000548186	0.000456847	0.000419131	0.000373486	0.000303538	0.000285341	0.000247842	0.000236966	0.000266131	0.000222003	0.0002132	0.000222824	0.0002483	0.0002339	0.000210875	0.000191137	0.000197183	0.000201574	0.000181101	0.000193631	0.000172032	0.000171353	0.000193959	0.000180817	0.000190045	0.000159677	0.00017126	0.000165085	0.000163091	0.0001949	0.000179181	0.00016672	0.000160493	0.000166709	0.000159748	0.000153551	0.000151094	0.000142491	0.000164552	0.000154642	0.000152675	0.000124045	0.000136587	0.000137772	0.00012534	0.00013205	0.000127651
Neuron_407	0.000485408	0.000518406	0.000428641	0.000339839	0.000297473	0.000251717	0.00020807	0.000204954	0.000184314	0.000158215	0.000183925	0.000159874	0.000160021	0.000162965	0.000201928	0.000158002	0.000150078	0.000120911	0.000139347	0.000148978	0.000119684	0.000132929	0.000140065	0.000128688	0.000126582	0.000126463	0.000133431	0.000107552	0.000122306	0.000118628	0.0001217	0.00012869	0.000126476	0.000120529	0.000119197	0.000110211	0.000108296	9.71058e-05	0.000101411	0.000101931	0.000119096	0.000100728	0.000103791	8.13958e-05	8.87021e-05	0.000103048	7.72152e-05	8.78855e-05	8.80642e-05
Neuron_408	0.000683396	0.000594209	0.000524982	0.00036629	0.000319974	0.000261206	0.000231496	0.000219256	0.000175925	0.000169449	0.000180389	0.000151227	0.00015287	0.00014902	0.000166385	0.000160846	0.000129018	0.000116861	0.000127193	0.000149482	0.000122652	0.000132052	0.000122112	0.000114042	0.000121504	0.00011092	0.000131205	0.000100202	0.000101293	0.00011043	0.000109399	0.000111895	0.0001171	0.000109183	9.96848e-05	0.000101726	0.000102854	0.00010054	9.08788e-05	9.53507e-05	0.000100263	8.35518e-05	9.06093e-05	8.11332e-05	8.53491e-05	9.24047e-05	7.01348e-05	8.41595e-05	7.68421e-05
Neuron_409	0.000657432	0.000539426	0.000490899	0.000355987	0.000312946	0.000288259	0.000247162	0.00022933	0.000196844	0.000206266	0.00019913	0.000171829	0.000160155	0.000169518	0.000169492	0.00017146	0.000147193	0.000148426	0.000148003	0.000161111	0.000153114	0.00015423	0.000126904	0.000125472	0.000145365	0.0001333	0.00014886	0.000116999	0.000124328	0.00012681	0.000123684	0.000136849	0.000129034	0.000123931	0.000110245	0.000115613	0.000113433	0.000111455	0.00010743	0.000117839	0.000123461	0.00013292	0.000124042	0.000101321	9.66194e-05	0.000100422	9.43081e-05	9.54982e-05	9.01728e-05
Neuron_410	0.000313436	0.00032128	0.000268232	0.000209422	0.00017397	0.000147958	0.00013268	0.000126935	0.000108163	0.000100636	0.000100878	9.24119e-05	8.54053e-05	9.18848e-05	8.89243e-05	8.97692e-05	8.36982e-05	7.74362e-05	8.07639e-05	8.19744e-05	7.76422e-05	8.01768e-05	6.90921e-05	6.71191e-05	7.99437e-05	7.60783e-05	8.17088e-05	6.00127e-05	6.99002e-05	6.83203e-05	6.30078e-05	7.22006e-05	6.78144e-05	5.60897e-05	6.14424e-05	6.86227e-05	5.94701e-05	5.50296e-05	6.90978e-05	5.35965e-05	6.89718e-05	6.78526e-05	6.37546e-05	5.75273e-05	5.77978e-05	4.6926e-05	4.95002e-05	5.4675e-05	5.20346e-05
Neuron_411	0.000554035	0.000457773	0.000417546	0.000324396	0.000281557	0.000249769	0.000210659	0.000207456	0.000180895	0.000164566	0.000186583	0.000162469	0.000151071	0.00015534	0.000181478	0.000153297	0.00014197	0.000129395	0.000138546	0.00015121	0.000124144	0.000138695	0.000129146	0.000124377	0.000127074	0.000119857	0.000137361	0.000112475	0.000118939	0.00011811	0.000118563	0.000126375	0.000131272	0.000122297	0.000115741	0.000106157	0.000107286	9.11504e-05	9.9285e-05	0.000107771	0.000117485	0.000110986	0.000113479	8.82894e-05	8.44009e-05	0.00010146	7.88944e-05	8.38696e-05	8.49997e-05
Neuron_412	0.000553261	0.000445624	0.000420977	0.000340377	0.000281141	0.00026145	0.000225447	0.000205804	0.000169583	0.000180937	0.00017862	0.000152685	0.000148824	0.000155131	0.000161811	0.000145713	0.000136449	0.00011648	0.00012718	0.000134203	0.000128413	0.000117626	0.000116424	0.000112327	0.000120464	0.000115782	0.000120461	9.20393e-05	0.000109247	0.000108754	0.00011962	0.000118926	0.000102635	0.000103264	8.59682e-05	0.000104372	9.22795e-05	9.68861e-05	9.66191e-05	8.43097e-05	0.000111018	0.000109428	0.000101436	8.3787e-05	8.04271e-05	8.6261e-05	7.96874e-05	8.22445e-05	8.49973e-05
Neuron_413	0.00058643	0.000605071	0.000506462	0.000326669	0.000249103	0.000236281	0.000200881	0.000191538	0.0001541	0.000160634	0.000144232	0.000132626	0.000121343	0.000134527	0.000143839	0.000128954	0.000115166	0.000110052	0.000110809	0.000120352	0.000111674	0.000115995	9.9823e-05	9.51453e-05	0.000102929	9.24349e-05	0.000106397	9.57604e-05	9.58777e-05	9.3705e-05	9.18156e-05	0.000104792	9.4042e-05	7.86504e-05	7.39319e-05	8.27588e-05	8.46218e-05	7.2159e-05	8.71509e-05	8.02675e-05	9.50678e-05	8.46282e-05	8.53644e-05	7.74709e-05	7.67501e-05	6.47631e-05	6.55656e-05	6.36355e-05	6.44968e-05
Neuron_414	0.000451198	0.000454707	0.000385935	0.000323147	0.000254026	0.000226694	0.000184912	0.000178431	0.000161732	0.000136659	0.000152078	0.000141669	0.000131564	0.0001379	0.000173264	0.000144616	0.000122946	0.000106819	0.000121465	0.000123077	0.000109622	0.000101594	0.000110829	0.000106575	0.000115846	0.000113758	0.000115851	9.34418e-05	0.000102695	0.000100207	0.00010415	0.000117457	9.97793e-05	9.55072e-05	9.4199e-05	9.72425e-05	8.56423e-05	8.52622e-05	8.89974e-05	8.15903e-05	0.000101589	8.96452e-05	8.37832e-05	6.47871e-05	7.59732e-05	8.22073e-05	6.45656e-05	8.16546e-05	7.68327e-05
Neuron_415	0.00077032	0.000640582	0.000565516	0.000427775	0.000352868	0.000305222	0.000256583	0.000253098	0.000220726	0.000199094	0.000226996	0.000190094	0.000179645	0.000190752	0.00021	0.000188639	0.000170627	0.000162448	0.000167024	0.000190419	0.000152405	0.000165865	0.000164258	0.000150819	0.000168777	0.000152562	0.000184492	0.00013166	0.000143703	0.000142497	0.000135994	0.000149862	0.000158161	0.000138507	0.000136892	0.000144155	0.000124857	0.000111557	0.000129193	0.000128932	0.000142203	0.000129744	0.000140931	0.000110055	0.000113462	0.000117929	9.42083e-05	0.000115837	0.000106414
Neuron_416	0.000402468	0.000311346	0.000302638	0.000236895	0.000208386	0.000179168	0.000156327	0.000154154	0.000128662	0.00012877	0.000133723	0.000115538	0.000106651	0.000112647	0.000112549	0.000113602	0.000107387	0.000100217	9.93693e-05	0.000106211	9.52927e-05	9.99858e-05	8.91282e-05	8.95386e-05	9.69827e-05	9.38439e-05	0.000104972	7.97378e-05	9.04729e-05	8.98517e-05	8.2591e-05	9.49938e-05	9.09572e-05	8.43408e-05	8.145e-05	8.482e-05	7.58958e-05	7.31313e-05	7.83438e-05	7.81801e-05	8.25978e-05	8.61135e-05	8.51819e-05	6.65782e-05	6.82902e-05	6.99235e-05	6.41627e-05	6.43437e-05	6.44275e-05
Neuron_417	0.000644943	0.000534558	0.000489328	0.000404597	0.000357063	0.000314222	0.000260059	0.000251168	0.000221758	0.000215013	0.000215316	0.000187114	0.000179452	0.000189096	0.000190936	0.000193539	0.000173479	0.000162605	0.000159656	0.000171902	0.000157202	0.000163321	0.000149366	0.000152538	0.000164961	0.00016332	0.000170911	0.000125005	0.000149937	0.00014884	0.000135447	0.000171408	0.000152147	0.000140303	0.000139455	0.000135507	0.000124039	0.000117054	0.00012043	0.000132563	0.000137011	0.000146643	0.000144959	0.000105588	0.000107672	0.000116612	0.000107398	0.000105469	0.000104664
Neuron_418	0.000318943	0.000257393	0.00024012	0.000187418	0.000150594	0.000129617	0.000113753	0.000111424	9.46194e-05	8.43608e-05	9.44814e-05	8.75685e-05	7.37463e-05	7.93881e-05	9.11379e-05	8.32848e-05	7.54263e-05	7.0642e-05	7.70095e-05	7.64813e-05	6.52751e-05	6.72131e-05	6.68956e-05	6.3302e-05	7.48236e-05	6.41331e-05	7.41319e-05	6.19397e-05	6.11487e-05	6.12246e-05	5.77152e-05	6.52728e-05	6.38304e-05	5.80855e-05	6.14582e-05	6.04227e-05	5.63564e-05	5.01902e-05	5.44581e-05	5.18633e-05	6.00759e-05	5.35464e-05	5.45941e-05	4.54238e-05	5.05375e-05	5.08235e-05	3.93402e-05	5.09017e-05	4.60449e-05
Neuron_419	0.000663646	0.000571812	0.000522829	0.000409401	0.00036907	0.000327988	0.00027808	0.000273565	0.000226895	0.000215202	0.00024208	0.000200476	0.000196128	0.000199586	0.00023046	0.000201273	0.000187861	0.000165504	0.000170846	0.000204185	0.000158484	0.000175779	0.000170118	0.000159194	0.000164418	0.000157655	0.000190049	0.000139751	0.000157932	0.000149571	0.000149538	0.000162728	0.000171699	0.000156719	0.000147551	0.000145259	0.000137317	0.000122638	0.000128291	0.000140257	0.000145683	0.000138195	0.000149595	0.000111468	0.000114036	0.000133277	0.000102067	0.00011679	0.000111328
Neuron_420	0.000440412	0.000358244	0.000336431	0.000281931	0.000232997	0.000220043	0.0001884	0.00018297	0.000156843	0.000151595	0.000167951	0.00015111	0.000131324	0.000139573	0.000144491	0.000138597	0.000131021	0.000128301	0.000132314	0.000132543	0.000116818	0.000111346	0.000109809	0.000106989	0.000131692	0.000115541	0.00012933	0.000101501	0.000109333	0.000102465	0.000105419	0.000109343	0.000103837	9.86525e-05	9.78576e-05	0.000109351	8.80472e-05	8.66073e-05	0.000101421	8.77421e-05	0.000110117	0.000112284	0.000103873	8.19566e-05	8.3901e-05	8.37556e-05	7.59117e-05	8.64246e-05	8.52674e-05
Neuron_421	0.000465718	0.000436282	0.000407902	0.000335832	0.000315593	0.000273625	0.000247106	0.00023005	0.000205899	0.000199724	0.000214864	0.000184723	0.000168419	0.000182577	0.000194629	0.000189015	0.000177651	0.000160972	0.000164023	0.000169363	0.00015203	0.000167087	0.000145875	0.000149231	0.000170752	0.00015293	0.00017248	0.000129584	0.000146447	0.000142045	0.000142346	0.000163477	0.000154126	0.000137994	0.000139879	0.000136591	0.000132211	0.000121055	0.000125116	0.000121943	0.000140152	0.000140145	0.000139947	0.000111722	0.000114756	0.000115384	0.000104447	0.000114335	0.000107559
Neuron_422	0.000770091	0.000624091	0.000588154	0.000433969	0.000393319	0.000339885	0.000303214	0.000290564	0.000252539	0.000246778	0.000259049	0.000234709	0.000216884	0.00022859	0.000250955	0.00022446	0.000213595	0.000191163	0.000201988	0.00021658	0.000187703	0.000208758	0.000187297	0.000182638	0.000194948	0.000180306	0.000201987	0.000161378	0.000181147	0.000176655	0.000171191	0.000196156	0.000190291	0.000174027	0.00017242	0.000160738	0.000157972	0.00013989	0.000147686	0.000157435	0.000174149	0.0001704	0.000171399	0.000135576	0.000132183	0.000147302	0.000122846	0.000126903	0.000126228
Neuron_423	0.000398543	0.000365156	0.000332147	0.000248057	0.000200914	0.000184988	0.000140804	0.000148232	0.000122615	0.000124202	0.000136842	0.000120987	0.000108302	0.000122743	0.000126141	0.000119265	0.000116301	0.000109271	0.000106741	0.000108316	0.000102616	0.00010189	8.85163e-05	9.31744e-05	0.000107149	9.58687e-05	9.82628e-05	8.66787e-05	9.78187e-05	8.55341e-05	8.72008e-05	9.56588e-05	7.99367e-05	7.99822e-05	7.6507e-05	9.80167e-05	7.32723e-05	8.0315e-05	9.56841e-05	7.65799e-05	8.86542e-05	8.54771e-05	8.17988e-05	7.48484e-05	8.32873e-05	6.66634e-05	7.00099e-05	7.2883e-05	6.9108e-05
Neuron_424	0.000481923	0.000433914	0.000423719	0.00029815	0.000225541	0.000211253	0.000191503	0.000184562	0.000147209	0.000134914	0.000154722	0.000136803	0.00010703	0.00011585	0.000122322	0.000135145	0.000110481	0.000121018	0.000120835	0.00011482	0.000101886	0.000103077	9.25262e-05	8.75219e-05	0.000135141	0.000102557	0.000120252	0.000102189	9.17576e-05	8.69002e-05	8.29016e-05	9.52066e-05	8.59872e-05	7.81867e-05	9.13592e-05	8.96842e-05	8.30331e-05	7.13844e-05	9.29959e-05	7.32623e-05	9.49301e-05	9.05284e-05	8.26261e-05	7.5343e-05	8.09892e-05	6.51143e-05	6.41717e-05	7.76859e-05	7.67837e-05
Neuron_425	0.000451681	0.000419793	0.000404427	0.000301759	0.000266269	0.000241483	0.000209829	0.000196779	0.000170182	0.000159985	0.00018433	0.000154961	0.000139341	0.000152063	0.000167924	0.000154036	0.000146494	0.000131162	0.000137398	0.000139617	0.000121413	0.000127358	0.000118935	0.000116338	0.000138825	0.000124107	0.000134735	0.00011432	0.000121019	0.000110146	0.000109081	0.000128358	0.000119515	0.00011041	0.000112371	0.000109504	0.000109262	9.45767e-05	0.000107749	9.08354e-05	0.000117866	0.000111025	0.00010635	8.59334e-05	9.44203e-05	9.04576e-05	8.05588e-05	8.87833e-05	8.6992e-05
Neuron_426	0.000539573	0.000560734	0.000469634	0.00034392	0.000277254	0.000253185	0.000217327	0.00020197	0.000184773	0.000163396	0.000176521	0.000158505	0.000145725	0.000162316	0.000201698	0.000163687	0.000145134	0.000121184	0.000137185	0.00014655	0.000130461	0.000131882	0.000130246	0.000120081	0.000122689	0.000114723	0.000117969	0.000109087	0.000116596	0.000104956	0.000116	0.000123205	0.000108029	0.000108731	9.74833e-05	9.70419e-05	0.000100925	9.65197e-05	0.000103875	8.93822e-05	0.000114375	9.94609e-05	8.85106e-05	8.19986e-05	9.24791e-05	9.14662e-05	7.33288e-05	8.47964e-05	7.94329e-05
Neuron_427	0.000662755	0.00058139	0.000536426	0.000399739	0.000336439	0.000313935	0.000275637	0.000255986	0.00021768	0.000213284	0.000218574	0.000210564	0.000184468	0.000219377	0.000236771	0.000189188	0.000192804	0.000169946	0.000183089	0.000180023	0.000169527	0.000178968	0.000162047	0.000156344	0.000175954	0.000153942	0.000159213	0.000144386	0.000159828	0.000143534	0.000145063	0.000158537	0.000137495	0.000127821	0.000127454	0.000142323	0.000127253	0.000126398	0.000147581	0.00011711	0.0001493	0.000131604	0.000133449	0.000124226	0.00013477	0.00011051	0.000103499	0.000118976	0.000108122
Neuron_428	0.000396751	0.000410475	0.000342024	0.000256676	0.000195607	0.000182804	0.000135764	0.000143377	0.000114543	9.76954e-05	0.000122132	9.89222e-05	7.95613e-05	8.21614e-05	9.3733e-05	0.000107864	8.77898e-05	9.76995e-05	8.57208e-05	8.20448e-05	7.36835e-05	7.92256e-05	6.89306e-05	7.23911e-05	0.000104797	7.27285e-05	9.27099e-05	7.62333e-05	7.21563e-05	6.47751e-05	6.3192e-05	7.84164e-05	6.94774e-05	6.47049e-05	7.41065e-05	7.31344e-05	5.78744e-05	5.02485e-05	7.12767e-05	6.29531e-05	6.91986e-05	7.0998e-05	6.67268e-05	5.67796e-05	5.97541e-05	5.14451e-05	5.07052e-05	5.88148e-05	6.29657e-05
Neuron_429	0.000392263	0.00033903	0.000303821	0.000204361	0.000167232	0.000148918	0.000136885	0.000123031	9.36802e-05	9.94938e-05	9.03341e-05	7.62972e-05	7.48561e-05	7.65817e-05	7.23137e-05	8.2209e-05	6.09185e-05	6.20595e-05	6.39681e-05	7.7123e-05	6.8438e-05	6.99966e-05	5.78288e-05	5.44366e-05	6.43007e-05	5.78746e-05	6.91677e-05	5.13704e-05	5.02137e-05	5.66693e-05	5.33197e-05	5.82027e-05	5.7634e-05	5.13866e-05	4.48275e-05	4.74279e-05	5.14129e-05	4.85066e-05	4.50855e-05	4.78422e-05	4.99466e-05	4.80399e-05	5.00527e-05	4.52843e-05	4.18759e-05	4.23704e-05	3.76014e-05	4.12278e-05	3.8246e-05
Neuron_430	0.000229618	0.000214605	0.000183196	0.000124434	9.71135e-05	8.45887e-05	7.34557e-05	6.70768e-05	5.09978e-05	5.01623e-05	5.07361e-05	4.2895e-05	4.05229e-05	4.28799e-05	4.14741e-05	4.79016e-05	3.33781e-05	3.59583e-05	3.62618e-05	4.14967e-05	3.57195e-05	3.64718e-05	3.22852e-05	2.88905e-05	4.12142e-05	3.49252e-05	3.93023e-05	2.89073e-05	2.67031e-05	2.97632e-05	2.68403e-05	3.10982e-05	3.06004e-05	2.52651e-05	2.62156e-05	2.97258e-05	2.74047e-05	2.61562e-05	2.90485e-05	2.7222e-05	2.74087e-05	2.37405e-05	2.66037e-05	2.50894e-05	2.65045e-05	2.07181e-05	2.0382e-05	2.63027e-05	2.07084e-05
Neuron_431	0.0006153	0.000528501	0.000504041	0.000369842	0.000352285	0.000313736	0.000283106	0.000252032	0.000209496	0.000227781	0.000206311	0.000185638	0.000174287	0.000182542	0.000172303	0.000194942	0.00016497	0.000164831	0.000159446	0.000172223	0.000164858	0.00017049	0.000133936	0.00013424	0.000162657	0.000147752	0.000160679	0.000124697	0.000138034	0.000134292	0.000119556	0.000152291	0.000140379	0.000128516	0.000124708	0.000122325	0.000124166	0.000119297	0.000113944	0.000127406	0.000126014	0.000141175	0.000134189	0.000110794	0.000108454	0.000104724	0.000102737	9.9492e-05	9.43744e-05
Neuron_432	0.000558139	0.000586041	0.000484679	0.0003304	0.000252897	0.000212197	0.000175357	0.000166792	0.000150588	0.000134139	0.000132268	0.00012087	0.000106942	0.00012278	0.00013761	0.0001177	9.83012e-05	8.71309e-05	0.000102528	0.000102799	0.000106201	0.00010649	9.2112e-05	9.14082e-05	9.79578e-05	8.63642e-05	9.68608e-05	7.03716e-05	7.63224e-05	8.77783e-05	8.82933e-05	9.46466e-05	8.08142e-05	6.4637e-05	6.13741e-05	7.58114e-05	7.12306e-05	6.397e-05	8.33579e-05	6.10594e-05	8.17621e-05	6.98947e-05	6.69566e-05	7.21539e-05	6.83586e-05	4.99915e-05	5.0657e-05	6.66959e-05	5.67237e-05
Neuron_433	0.000310778	0.00029502	0.000260702	0.0002045	0.000166703	0.000152256	0.000128017	0.000118825	9.93419e-05	9.94906e-05	0.000102079	8.88495e-05	8.48494e-05	8.69533e-05	9.93456e-05	9.32327e-05	8.21831e-05	6.87258e-05	7.43167e-05	8.04476e-05	7.13755e-05	6.48253e-05	6.61476e-05	6.36812e-05	7.51539e-05	6.72795e-05	7.17678e-05	5.66831e-05	6.4675e-05	5.68075e-05	6.39969e-05	6.61651e-05	5.79232e-05	5.82799e-05	5.25742e-05	6.17189e-05	5.2528e-05	5.71132e-05	5.79338e-05	4.84462e-05	6.09734e-05	5.9247e-05	5.49849e-05	4.48596e-05	4.73779e-05	4.82859e-05	4.30947e-05	5.05573e-05	4.48814e-05
Neuron_434	0.000429904	0.000404457	0.000366246	0.00027656	0.000217777	0.000195125	0.000161487	0.000150121	0.000143185	0.000124619	0.000141371	0.000127428	0.000112976	0.000133222	0.000154442	0.000116944	0.000110983	9.53799e-05	0.000111728	0.00011137	0.000100897	0.00010435	0.00010259	9.32171e-05	9.99425e-05	9.15271e-05	9.23393e-05	8.55816e-05	9.08065e-05	8.7256e-05	9.32302e-05	9.98875e-05	8.72831e-05	8.374e-05	7.8154e-05	7.90644e-05	7.94804e-05	7.33896e-05	8.55232e-05	6.64073e-05	9.74323e-05	8.32997e-05	7.40362e-05	6.68828e-05	7.31426e-05	7.09595e-05	5.85535e-05	6.79223e-05	6.6758e-05
Neuron_435	0.000498273	0.000522789	0.000424279	0.000313562	0.000250356	0.00021589	0.00017034	0.000167578	0.000154131	0.000125991	0.000146775	0.000125721	0.000121458	0.000127754	0.00016078	0.000139967	0.000116533	0.000100823	0.000110321	0.000123655	0.00010147	0.000106608	0.000108122	0.000102718	0.000105987	0.000102407	0.000108222	9.22595e-05	9.40471e-05	9.05971e-05	9.16177e-05	0.000103582	9.85545e-05	9.19719e-05	9.19971e-05	8.51693e-05	8.47314e-05	7.86087e-05	8.45203e-05	8.12848e-05	9.25775e-05	7.87218e-05	7.62654e-05	6.43243e-05	7.56712e-05	7.96079e-05	5.8862e-05	7.13605e-05	6.8438e-05
Neuron_436	0.000537366	0.000447147	0.000431778	0.000319851	0.000268723	0.000227875	0.000209336	0.000183272	0.000149724	0.000151832	0.00015019	0.000125651	0.000128876	0.000131312	0.000139278	0.000140137	0.000108314	9.51011e-05	0.00010478	0.00012574	0.000112675	0.000107607	9.51497e-05	8.83737e-05	0.00010442	9.03309e-05	0.000106985	8.21946e-05	8.47907e-05	8.57203e-05	9.87531e-05	9.50687e-05	8.86005e-05	8.74897e-05	7.42892e-05	8.38438e-05	8.47649e-05	9.57732e-05	7.52051e-05	6.67676e-05	8.55318e-05	7.23666e-05	7.32124e-05	6.82686e-05	7.22293e-05	7.46053e-05	6.18047e-05	7.63704e-05	6.3906e-05
Neuron_437	0.000431076	0.000399885	0.000358062	0.000275074	0.000225251	0.000191805	0.000177004	0.00015925	0.000145647	0.000130178	0.000138732	0.000128141	0.000118677	0.000131112	0.000146961	0.000125334	0.0001118	9.40258e-05	0.000111149	0.000117656	0.000104407	0.000110349	0.000103295	9.19871e-05	0.000104784	9.10209e-05	0.000104786	8.02775e-05	8.76533e-05	9.04525e-05	0.000102192	9.61628e-05	9.26155e-05	8.78737e-05	7.90081e-05	8.40942e-05	8.33622e-05	8.46245e-05	8.03122e-05	6.92041e-05	9.18685e-05	7.67098e-05	7.54848e-05	7.14066e-05	7.58722e-05	7.6769e-05	5.72064e-05	7.6277e-05	6.50556e-05
Neuron_438	0.000567791	0.000516881	0.000505572	0.000385483	0.000309247	0.000273057	0.000240156	0.000224256	0.000194299	0.000180031	0.000203067	0.000172606	0.000165113	0.000177908	0.00020874	0.000175052	0.000155773	0.000129115	0.000146825	0.000159744	0.000139545	0.000140584	0.000135488	0.00012518	0.000138501	0.00012315	0.000138977	0.000113922	0.000126877	0.000118645	0.000139775	0.000135501	0.000120262	0.000125361	0.000108461	0.000113149	0.000110148	0.000118661	0.000109679	9.41176e-05	0.000125063	0.000110982	0.000103234	8.96325e-05	9.9329e-05	0.000107185	8.38282e-05	0.00010106	9.40024e-05
Neuron_439	0.000334533	0.000314876	0.000280235	0.000250398	0.000216803	0.000205925	0.000174716	0.000167765	0.000146474	0.000148623	0.000156035	0.000138916	0.000122586	0.000127404	0.00013592	0.000136145	0.000133312	0.00012114	0.00012139	0.000119823	0.000107964	0.000102843	9.84204e-05	0.000102396	0.000126939	0.000112723	0.00012081	9.62224e-05	0.000110897	9.54766e-05	9.98471e-05	0.000107164	9.52995e-05	9.61677e-05	9.79477e-05	0.00010334	8.73981e-05	8.72638e-05	9.68809e-05	8.31335e-05	0.000103556	0.000113776	9.8224e-05	7.57513e-05	8.25528e-05	8.05861e-05	7.99936e-05	8.27872e-05	8.32638e-05
Neuron_440	0.00102883	0.000974778	0.000843884	0.000646452	0.000595232	0.000523695	0.000460011	0.000445904	0.000383773	0.00037951	0.00038529	0.000335224	0.000311872	0.000334039	0.000345467	0.000346551	0.000317179	0.000295153	0.00029301	0.000316137	0.000273045	0.000300386	0.000264836	0.000262346	0.000297321	0.000273836	0.000295417	0.000237953	0.000265193	0.000259048	0.000243496	0.000287276	0.000270564	0.000250524	0.000247022	0.000239406	0.000232648	0.000217648	0.000219488	0.000231744	0.00024538	0.000257178	0.000251225	0.000193621	0.000205147	0.000208803	0.000194206	0.00019418	0.000184847
Neuron_441	0.000538914	0.000525848	0.000499132	0.000378408	0.000309445	0.000281429	0.000244736	0.000228991	0.00019215	0.000195259	0.000193434	0.000168166	0.000156302	0.000167187	0.000162477	0.000170417	0.000157475	0.00014758	0.000145053	0.000149228	0.000143251	0.000140795	0.000127251	0.000130823	0.000163904	0.000138251	0.000157111	0.000113268	0.000130626	0.000126663	0.000118494	0.000141657	0.000123456	0.000109987	0.00011419	0.000121342	0.000107444	0.000100534	0.000119305	0.000102032	0.000122099	0.00012621	0.000121404	9.88356e-05	0.000101561	9.00871e-05	9.28327e-05	9.5794e-05	9.83213e-05
Neuron_442	0.000466763	0.000516973	0.000480118	0.000335038	0.000258221	0.000235949	0.000205417	0.000206277	0.0001705	0.000153207	0.00017282	0.000160395	0.00013195	0.000146519	0.000163643	0.000151423	0.000139281	0.000138222	0.000140759	0.000131183	0.000126989	0.00012561	0.000116042	0.000112471	0.000144521	0.000123303	0.000135844	0.000112981	0.000120608	0.000111472	0.000103193	0.000121698	0.000103851	8.98504e-05	0.000102142	0.000118249	9.9338e-05	8.94252e-05	0.000124622	8.57246e-05	0.000118028	0.000108447	9.46341e-05	9.51223e-05	0.000105616	7.61441e-05	8.0245e-05	9.46063e-05	9.10294e-05
Neuron_443	0.00048215	0.000467123	0.00038142	0.00029938	0.000263784	0.000232108	0.00021015	0.000196915	0.000176381	0.0001724	0.000167647	0.000152457	0.000137824	0.000147232	0.000137963	0.000152745	0.000137721	0.000133242	0.000132612	0.00013817	0.00012391	0.000136219	0.00011365	0.000114262	0.000136803	0.000124451	0.000137377	9.91928e-05	0.000114621	0.000114193	0.000108319	0.000121787	0.000118038	0.00010264	0.000105182	0.000111287	9.96694e-05	9.42549e-05	9.92808e-05	9.78923e-05	0.000109786	0.000119252	0.000115285	9.16433e-05	9.01719e-05	8.46523e-05	8.5206e-05	9.41612e-05	7.96841e-05
Neuron_444	0.000534023	0.000507522	0.000402305	0.000305082	0.000267892	0.000245648	0.000193668	0.000196508	0.000156616	0.000157689	0.000155226	0.000135536	0.000126956	0.000140027	0.000130429	0.000153934	0.0001367	0.000134041	0.000121445	0.00012931	0.00012139	0.000127825	0.000103503	0.000111007	0.000140946	0.000121151	0.000123492	9.65739e-05	0.000116313	0.000103464	9.01467e-05	0.00012486	0.000104188	9.41004e-05	9.80281e-05	0.000114149	9.23855e-05	9.20833e-05	0.000108309	9.88057e-05	9.95105e-05	0.000110313	0.000105212	9.26935e-05	0.000100558	7.67437e-05	8.87828e-05	8.19236e-05	8.15109e-05
Neuron_445	0.000492436	0.000468174	0.000414181	0.000311045	0.000270252	0.000234455	0.000190367	0.000184501	0.000157113	0.000154347	0.000163651	0.000139584	0.000127773	0.000140293	0.000148288	0.000146146	0.000134665	0.000124446	0.000123799	0.00012551	0.000119763	0.000129416	0.000101803	0.000109097	0.000127421	0.000106831	0.000119792	9.84758e-05	0.000109286	0.000102996	0.000100241	0.000121466	0.000108516	9.50005e-05	9.09101e-05	0.00011122	9.87666e-05	9.88862e-05	0.000105421	9.00876e-05	0.000100214	9.4641e-05	9.54608e-05	8.80269e-05	9.86541e-05	7.85614e-05	8.03275e-05	8.59196e-05	7.81223e-05
Neuron_446	0.000939851	0.000733658	0.000618275	0.000473393	0.000381939	0.000369036	0.000308004	0.000316034	0.000252274	0.000226212	0.000262633	0.00024218	0.000196907	0.000205171	0.000220381	0.000228133	0.000198253	0.000207445	0.000213542	0.000201146	0.000176687	0.000183404	0.00017431	0.000166286	0.000228561	0.00018259	0.000204485	0.000174474	0.000165446	0.000166112	0.000148899	0.000178469	0.000156975	0.000151686	0.000171099	0.000169819	0.000141236	0.000126449	0.000162188	0.000135441	0.000166033	0.000161093	0.000152001	0.000129374	0.000137049	0.000126379	0.000117561	0.000133087	0.000143018
Neuron_447	0.000642409	0.000546075	0.00050597	0.00038422	0.00031865	0.000279585	0.000246201	0.000217782	0.000194206	0.000192904	0.000182852	0.000167974	0.000153992	0.000168361	0.000162844	0.000157825	0.000141452	0.000137397	0.00014251	0.00015446	0.000146525	0.00015042	0.000124702	0.000124205	0.000142149	0.000130282	0.000153419	0.000104346	0.000117675	0.000123657	0.000125376	0.000131047	0.000127673	0.000112437	0.000101079	0.000113364	0.000108379	0.000101351	0.00010686	0.000105448	0.000121216	0.000120586	0.000122958	0.00010446	9.41837e-05	9.32085e-05	8.4816e-05	9.77884e-05	8.57321e-05
Neuron_448	0.000421769	0.000380102	0.000357987	0.000274857	0.000218506	0.000203605	0.000171175	0.000165776	0.000144945	0.000136339	0.000145986	0.000131161	0.00011705	0.000119949	0.000130988	0.000126176	0.000110632	0.000110771	0.000112847	0.000118723	0.000108704	0.000102068	9.91443e-05	0.000100256	0.000108523	0.000105495	0.000119273	8.78488e-05	9.55357e-05	9.58023e-05	9.17197e-05	0.000103225	9.51933e-05	8.81424e-05	8.56526e-05	9.39379e-05	7.99295e-05	7.379e-05	8.5423e-05	8.32247e-05	9.49534e-05	9.65946e-05	9.20441e-05	7.26481e-05	7.19886e-05	7.36802e-05	6.38796e-05	7.58653e-05	6.91325e-05
Neuron_449	0.000655998	0.000610682	0.000547277	0.000430278	0.000338767	0.000291375	0.000238635	0.000226076	0.000203252	0.000166324	0.000193257	0.000177553	0.000166748	0.000175019	0.000218762	0.000167323	0.000148176	0.000134007	0.00015161	0.000152107	0.0001376	0.000139612	0.000135997	0.000124918	0.000138296	0.000134256	0.000137451	0.00011551	0.000124854	0.000122455	0.000129476	0.000136526	0.000129107	0.000118047	0.00010775	0.00011712	0.000114834	0.000105193	0.000119401	9.63398e-05	0.000125963	0.000103249	0.00010253	8.93049e-05	0.0001009	0.000100831	7.92653e-05	9.69227e-05	9.56501e-05
Neuron_450	0.000572265	0.000448491	0.000418673	0.000325431	0.000290871	0.000253469	0.000208516	0.000223092	0.000182306	0.000167924	0.000203061	0.000186443	0.000169923	0.000188569	0.000224232	0.000173313	0.00018019	0.000157506	0.000167203	0.000172657	0.000148231	0.000163156	0.000150701	0.000148435	0.000147986	0.000147792	0.000147345	0.000145209	0.0001528	0.000139386	0.000129847	0.000146047	0.000141717	0.000130961	0.000135989	0.000142233	0.000128062	0.000119183	0.000142046	0.000124562	0.000139004	0.000114291	0.000124627	0.000112032	0.000127761	0.00011654	9.66357e-05	0.000104914	9.98281e-05
Neuron_451	0.000412152	0.000390875	0.000365237	0.000269397	0.000247381	0.000218473	0.000202936	0.000190257	0.000162715	0.000159182	0.000164334	0.000147727	0.000135398	0.000150268	0.000148185	0.000142521	0.00013873	0.000126293	0.000130756	0.000136425	0.000122987	0.000131648	0.000115297	0.000114022	0.000130025	0.000121546	0.000132366	0.000102932	0.000116236	0.000112345	0.000105627	0.000119091	0.000115595	0.00010102	0.000103128	0.000110302	0.000100323	9.133e-05	0.000106755	9.18098e-05	0.00011334	0.0001102	0.000108206	9.22357e-05	9.32217e-05	8.43892e-05	8.07256e-05	8.71256e-05	8.29025e-05
Neuron_452	0.000536848	0.000475236	0.00040976	0.000308603	0.000244847	0.000207266	0.000170806	0.000179079	0.000150321	0.000132469	0.000154943	0.000129305	0.000110478	0.000114831	0.000135462	0.000126913	0.000114493	0.000108039	0.000111823	0.000108808	9.38812e-05	0.00010426	9.38457e-05	9.49732e-05	0.000115695	9.96605e-05	0.000118995	8.91106e-05	9.47252e-05	9.54967e-05	9.03206e-05	0.000101893	9.3575e-05	8.19029e-05	9.24303e-05	8.87874e-05	8.16355e-05	7.24798e-05	8.59422e-05	7.44992e-05	9.40213e-05	9.57786e-05	8.75781e-05	6.85936e-05	7.37626e-05	6.6414e-05	6.51548e-05	7.73095e-05	7.11716e-05
Neuron_453	0.000475355	0.000472065	0.000419469	0.000312197	0.000236767	0.000220974	0.000191552	0.000171498	0.000146622	0.000147645	0.000136988	0.00012299	0.000120415	0.000140031	0.000148396	0.000128899	0.000110136	9.12013e-05	0.000104309	0.000109997	0.000105707	0.00010304	9.99063e-05	9.00748e-05	0.000104982	9.38062e-05	9.19989e-05	7.9086e-05	8.95361e-05	8.22676e-05	9.94857e-05	0.000102906	8.10613e-05	7.90121e-05	6.82331e-05	7.98454e-05	7.55479e-05	7.92722e-05	8.19647e-05	5.94445e-05	9.39828e-05	8.07664e-05	7.62116e-05	7.12561e-05	7.11031e-05	6.654e-05	6.27195e-05	7.14174e-05	6.86613e-05
Neuron_454	0.000294741	0.000242369	0.000223627	0.000146633	0.000116449	9.8013e-05	7.81529e-05	8.08264e-05	6.57924e-05	6.40148e-05	6.75765e-05	5.71407e-05	5.37484e-05	6.01567e-05	7.29274e-05	5.68439e-05	4.97178e-05	4.63897e-05	4.94483e-05	5.4562e-05	5.09248e-05	5.12671e-05	4.73951e-05	4.63331e-05	4.2414e-05	4.56785e-05	4.84334e-05	4.27955e-05	4.22211e-05	4.65289e-05	4.03927e-05	5.03977e-05	4.43597e-05	3.62899e-05	3.58114e-05	4.14252e-05	4.08445e-05	3.43702e-05	4.17028e-05	3.69051e-05	4.08076e-05	3.20643e-05	3.5225e-05	3.38192e-05	3.60094e-05	2.97573e-05	2.70183e-05	3.10876e-05	3.01798e-05
Neuron_455	0.000489316	0.00043938	0.000401333	0.000326798	0.000289078	0.000265137	0.000221533	0.000211449	0.00018697	0.000171488	0.000201576	0.000167844	0.000154725	0.00016554	0.000185578	0.000168641	0.000164495	0.000143801	0.000150746	0.000148245	0.000132256	0.000140307	0.000130168	0.0001325	0.000153554	0.000141028	0.000149992	0.000122523	0.000135413	0.000128036	0.000125138	0.000151483	0.00013288	0.000122238	0.000127907	0.000125623	0.000119611	0.000107011	0.000118712	0.000100408	0.000132771	0.000125841	0.000121435	9.40951e-05	0.000102745	0.000101864	9.37644e-05	0.000100928	0.000101649
Neuron_456	0.000448815	0.000401302	0.000360267	0.000303765	0.000255721	0.000235851	0.00020107	0.000189969	0.000172474	0.000158163	0.000184003	0.000158848	0.000145674	0.000158617	0.00017422	0.000159103	0.00015109	0.000130494	0.000140307	0.000137814	0.00012367	0.000125963	0.000118022	0.000118176	0.000141223	0.000125037	0.000135809	0.00010693	0.000126741	0.000111042	0.000123692	0.000135245	0.000111233	0.000108196	0.000105307	0.000117601	0.00010043	0.000105318	0.000110018	8.46434e-05	0.000120162	0.000113971	0.000107429	8.54569e-05	9.60664e-05	9.17886e-05	8.53875e-05	9.59617e-05	9.09966e-05
Neuron_457	0.000517911	0.000408401	0.000371274	0.000282067	0.000247332	0.000202522	0.000178163	0.000168223	0.000141067	0.000135218	0.000143429	0.000128326	0.000121301	0.000123187	0.000134079	0.000134576	0.00011078	0.000106912	0.000109932	0.000125916	0.000107231	0.000108969	0.000101441	0.000101765	0.000106695	0.000102267	0.000120349	8.97718e-05	9.21179e-05	9.51539e-05	9.05015e-05	0.000100213	9.88221e-05	8.87877e-05	9.07793e-05	9.1535e-05	8.32706e-05	7.86273e-05	8.12006e-05	8.535e-05	8.74368e-05	7.91545e-05	8.76007e-05	7.07954e-05	7.44955e-05	7.51365e-05	6.19786e-05	7.50738e-05	6.31509e-05
Neuron_458	0.000628652	0.000604886	0.00052951	0.000417247	0.000361254	0.000327179	0.000280036	0.000255416	0.000227597	0.000229718	0.000209855	0.000191031	0.000180276	0.000200369	0.000195591	0.00019726	0.000177485	0.000167791	0.000166264	0.000170822	0.000169435	0.00017149	0.000147557	0.000148722	0.000175288	0.000163211	0.000163329	0.000122288	0.000150265	0.000141756	0.000132421	0.000169259	0.000143276	0.000127005	0.000126327	0.000132391	0.000125804	0.000116161	0.000130543	0.000126753	0.000142693	0.000157816	0.000142418	0.000116952	0.000115435	0.000104162	0.000112365	0.000108359	0.00010465
Neuron_459	0.000501788	0.000464791	0.000403133	0.000317009	0.000251329	0.000217664	0.000190159	0.000172192	0.000142429	0.000134268	0.000127318	0.000116118	0.000111529	0.000114556	0.000126069	0.000126756	9.38379e-05	8.8072e-05	9.57483e-05	0.000105704	9.30881e-05	8.89721e-05	8.46151e-05	7.84404e-05	9.65082e-05	8.67861e-05	9.07113e-05	7.04123e-05	7.31974e-05	7.52135e-05	7.77295e-05	8.40511e-05	7.51073e-05	7.14793e-05	6.54612e-05	7.505e-05	6.93762e-05	7.43531e-05	6.9277e-05	6.13172e-05	7.3389e-05	6.62976e-05	6.30915e-05	5.63492e-05	6.05021e-05	5.96452e-05	5.19792e-05	6.54307e-05	5.73531e-05
Neuron_460	0.000244584	0.000212057	0.000198327	0.000144507	0.000112871	9.35016e-05	7.57618e-05	7.43105e-05	6.66421e-05	5.74777e-05	6.68853e-05	5.97788e-05	5.31506e-05	5.79399e-05	7.24532e-05	5.26766e-05	5.04767e-05	4.48211e-05	5.06139e-05	4.94646e-05	4.64821e-05	4.67103e-05	4.51142e-05	4.27706e-05	4.32357e-05	4.25741e-05	4.56658e-05	4.03482e-05	4.11279e-05	4.26973e-05	4.24597e-05	4.54535e-05	4.3506e-05	3.83661e-05	3.67069e-05	3.81134e-05	3.81677e-05	3.36091e-05	4.0035e-05	3.24287e-05	4.14944e-05	3.28334e-05	3.23971e-05	2.97946e-05	3.40409e-05	3.18043e-05	2.51185e-05	2.97635e-05	2.97478e-05
Neuron_461	0.000447923	0.000409129	0.000370928	0.000263606	0.000214976	0.000191985	0.000177273	0.00015357	0.00013601	0.000139566	0.000128862	0.000124951	0.000106155	0.000127621	0.000131406	0.000118528	0.000112036	9.66661e-05	0.000108904	0.000106437	0.000108389	0.000111189	9.28961e-05	9.19737e-05	0.000109193	8.61793e-05	9.81872e-05	7.75829e-05	8.62619e-05	8.13393e-05	9.4924e-05	9.25997e-05	8.24644e-05	7.65478e-05	6.75635e-05	7.79161e-05	7.78055e-05	7.52821e-05	8.28009e-05	6.61878e-05	8.91284e-05	8.12466e-05	7.81196e-05	7.90162e-05	7.47078e-05	6.30684e-05	6.08027e-05	7.34454e-05	6.29873e-05
Neuron_462	0.000521288	0.000452978	0.000432151	0.000330039	0.000292159	0.0002628	0.000218125	0.000202535	0.000171241	0.00016865	0.000181061	0.000156447	0.000144056	0.000157807	0.000164253	0.000161861	0.000151023	0.000137778	0.000136876	0.000139591	0.000129911	0.000137057	0.000108579	0.000115069	0.000136422	0.000122658	0.000131153	0.000116776	0.000122326	0.000110984	0.000108494	0.000127342	0.000115546	0.000104922	0.000106335	0.000118821	0.000109933	0.000111258	0.000110681	9.45943e-05	0.000109266	0.000101563	0.000106392	9.07496e-05	0.000106643	8.79691e-05	8.78913e-05	9.2043e-05	7.84346e-05
Neuron_463	0.000498303	0.000412231	0.000371313	0.00027788	0.000224409	0.000196827	0.000158546	0.000167952	0.000141178	0.000130281	0.000148564	0.000131693	0.000109876	0.000118246	0.000124047	0.000132522	0.000116416	0.000121289	0.000115416	0.000119704	0.000103363	0.000104935	9.88447e-05	0.000100866	0.000118235	0.000108145	0.000122477	9.9399e-05	0.000100679	9.64393e-05	7.98192e-05	0.000100976	9.46362e-05	8.44487e-05	9.26402e-05	0.000102771	8.05592e-05	7.6214e-05	9.48587e-05	9.01698e-05	9.06817e-05	9.1213e-05	9.48882e-05	7.45696e-05	8.22802e-05	7.09286e-05	6.83722e-05	7.89987e-05	6.76511e-05
Neuron_464	0.000586971	0.000546994	0.000513836	0.000367425	0.000268421	0.000242379	0.000209127	0.000192104	0.000160528	0.000151996	0.000162346	0.000138098	0.000133355	0.000142432	0.000161201	0.000139917	0.000123688	0.000103995	0.000114832	0.000120133	0.000113517	0.000107847	0.000109837	9.85837e-05	0.000117554	0.000103133	0.000113293	8.00462e-05	0.000100523	9.68331e-05	0.000108482	0.000110072	8.60729e-05	8.73913e-05	7.96731e-05	9.08762e-05	7.81558e-05	8.18176e-05	8.89634e-05	6.18938e-05	9.93237e-05	9.31839e-05	8.40299e-05	7.35273e-05	7.55524e-05	7.25475e-05	6.47627e-05	7.97955e-05	7.43247e-05
Neuron_465	0.000289488	0.000323885	0.000201131	0.000151749	0.000125313	0.000115615	7.44392e-05	9.11437e-05	7.04211e-05	5.62159e-05	6.57374e-05	5.88684e-05	5.31646e-05	5.28018e-05	6.88049e-05	7.12665e-05	5.39637e-05	5.04943e-05	5.09577e-05	5.03962e-05	4.82868e-05	4.85773e-05	4.60967e-05	4.89553e-05	5.0683e-05	4.88425e-05	4.91318e-05	4.33363e-05	4.59912e-05	4.46594e-05	4.01734e-05	5.49226e-05	4.44097e-05	3.78096e-05	4.41444e-05	4.8804e-05	3.59946e-05	3.39832e-05	4.42917e-05	4.15603e-05	4.2245e-05	4.199e-05	3.76197e-05	3.34015e-05	3.55419e-05	3.03708e-05	3.21492e-05	3.68688e-05	3.53312e-05
Neuron_466	0.00069905	0.000661503	0.00054264	0.000419783	0.000368746	0.000334581	0.000274373	0.000271874	0.000236081	0.00023957	0.000236486	0.000211328	0.000200083	0.000200189	0.000203287	0.000203539	0.000186793	0.000184339	0.00018063	0.000195984	0.000174365	0.000185209	0.000157906	0.000161645	0.000167866	0.000169715	0.000179047	0.000140514	0.000161009	0.000160702	0.00014723	0.000169612	0.000158428	0.000151439	0.000147835	0.000148023	0.000129186	0.000127297	0.000130374	0.000149618	0.00015245	0.000171835	0.000160927	0.000120296	0.000113555	0.000124365	0.000116964	0.000112594	0.000109398
Neuron_467	0.00046065	0.000469252	0.000411826	0.000343206	0.000271802	0.000249406	0.000213065	0.000195822	0.000177348	0.000155724	0.000175958	0.000153315	0.000153515	0.000164615	0.000186661	0.000153289	0.000143204	0.000119574	0.000131839	0.000140223	0.000120608	0.000117955	0.000127714	0.000113592	0.000126977	0.000118168	0.000122027	0.000100305	0.000117834	0.000103743	0.000118858	0.000118831	0.000105923	0.000107556	0.00010018	0.000105186	9.2494e-05	9.87551e-05	0.000101733	8.12416e-05	0.000116248	0.00010228	9.59555e-05	7.67576e-05	8.74317e-05	9.28943e-05	7.54347e-05	8.49219e-05	8.43221e-05
Neuron_468	0.000472041	0.000487898	0.000403368	0.000273322	0.000209887	0.000188228	0.000152045	0.000150593	0.000119147	0.000117824	0.000114654	0.000103559	9.17596e-05	0.000103423	0.000111029	0.000104404	8.61346e-05	8.45719e-05	8.92682e-05	9.44841e-05	8.55043e-05	8.67574e-05	7.60782e-05	7.42496e-05	9.04924e-05	8.00102e-05	8.4545e-05	6.97088e-05	6.9078e-05	6.9478e-05	6.61966e-05	7.79024e-05	6.50047e-05	5.87526e-05	5.86125e-05	6.90409e-05	6.35598e-05	6.15401e-05	7.12485e-05	6.12429e-05	6.94999e-05	6.47561e-05	6.32246e-05	5.95238e-05	6.45681e-05	4.70978e-05	4.98729e-05	5.95381e-05	5.1899e-05
Neuron_469	0.000581917	0.000553977	0.000503366	0.00036965	0.000338854	0.000289577	0.000269835	0.000253501	0.000211758	0.000211287	0.000213178	0.000180071	0.000172732	0.000175882	0.000183132	0.000195232	0.000170771	0.000154967	0.000157574	0.000173104	0.000149004	0.000161801	0.000144169	0.000141077	0.000163589	0.00014664	0.000164575	0.000129241	0.000139818	0.000136913	0.000133888	0.000152862	0.000146764	0.000133752	0.000133191	0.000132959	0.000128539	0.000122164	0.000115302	0.000119165	0.00013187	0.00013433	0.000131164	0.000105063	0.000109403	0.000111633	0.000101058	0.000110408	0.000100281
Neuron_470	0.000417812	0.000358801	0.000336391	0.000222432	0.000179562	0.000151591	0.000146056	0.000124844	0.000104407	0.000104043	9.25351e-05	8.87956e-05	7.33195e-05	8.76871e-05	8.36265e-05	8.44736e-05	6.84931e-05	6.92721e-05	7.62107e-05	7.88842e-05	7.97907e-05	8.25572e-05	6.28431e-05	5.83366e-05	7.58001e-05	5.68845e-05	7.65436e-05	5.60669e-05	5.30178e-05	6.03987e-05	6.28828e-05	5.99094e-05	6.06222e-05	4.89483e-05	4.3686e-05	5.54823e-05	5.68322e-05	5.43418e-05	5.86532e-05	4.53889e-05	5.85239e-05	4.68283e-05	5.08893e-05	5.80887e-05	5.46748e-05	3.98083e-05	3.83145e-05	5.24357e-05	4.03974e-05
Neuron_471	0.000548479	0.000572707	0.000464568	0.000380836	0.000330542	0.000285063	0.00024533	0.000236942	0.000213824	0.000191369	0.000200569	0.000177281	0.000168887	0.000179988	0.000198092	0.000181563	0.00017116	0.000148337	0.00015642	0.000164601	0.000144003	0.000155313	0.00014883	0.000141891	0.000157269	0.000153962	0.00015786	0.000127058	0.000142558	0.000138514	0.00013202	0.000155158	0.000142434	0.00012671	0.000135243	0.000133671	0.00012339	0.000110411	0.000126322	0.000112497	0.000139171	0.000137129	0.00012935	0.000102726	0.000107318	0.000107563	9.86902e-05	0.000108299	0.000105849
Neuron_472	0.000518869	0.000535153	0.000450267	0.000332453	0.000272932	0.000246403	0.000195837	0.000190658	0.0001606	0.000166193	0.000161071	0.000135589	0.000144153	0.000140172	0.000136079	0.000137575	0.000127354	0.000122301	0.000116849	0.000142375	0.000121215	0.000122116	0.000115224	0.000113191	0.000113064	0.000118239	0.000128265	8.59164e-05	0.000110007	0.000111468	9.86728e-05	0.000115284	0.000111003	0.000103589	9.8037e-05	0.000109524	8.57099e-05	8.63374e-05	9.65632e-05	0.000100693	0.000103421	0.000112402	0.000108254	8.03163e-05	7.8422e-05	8.54488e-05	7.89322e-05	7.62857e-05	7.57928e-05
Neuron_473	0.000741356	0.000642222	0.000581064	0.000422773	0.000367652	0.00029619	0.000261494	0.00022732	0.000190874	0.000182446	0.000187802	0.000157752	0.000161301	0.000161419	0.000179026	0.000175028	0.000134094	0.000124277	0.000131771	0.000153251	0.00013973	0.000140869	0.000116185	0.000115835	0.000133059	0.000122026	0.000138332	0.000106429	0.000105006	0.000111449	0.000117167	0.000125594	0.00012349	0.000114476	0.000105401	0.000103964	0.000113582	0.00011314	9.43979e-05	9.72239e-05	0.000105489	8.72771e-05	9.35155e-05	8.68154e-05	9.06819e-05	9.64172e-05	7.59835e-05	9.18613e-05	7.92891e-05
Neuron_474	0.000398699	0.000388101	0.000313828	0.000264118	0.000224085	0.000200233	0.000167503	0.000154746	0.000131818	0.000133442	0.000124039	0.000113637	0.000108787	0.00011942	0.000121011	0.000119415	0.000105652	9.2456e-05	9.77736e-05	9.87087e-05	9.79943e-05	9.66519e-05	8.86909e-05	8.72284e-05	0.000107461	9.24459e-05	9.6418e-05	6.81263e-05	8.40521e-05	8.27351e-05	8.29393e-05	9.58751e-05	7.90707e-05	7.38159e-05	7.15745e-05	8.17634e-05	7.00982e-05	7.05047e-05	7.61796e-05	6.60921e-05	7.96528e-05	8.52752e-05	7.79252e-05	6.68265e-05	6.64224e-05	6.06611e-05	6.25015e-05	6.57698e-05	6.40502e-05
Neuron_475	0.000419953	0.000416484	0.000369134	0.000259048	0.000207057	0.000186712	0.000162662	0.000145361	0.000120978	0.000130747	0.000122612	0.000108444	0.000104855	0.000109886	0.000116479	0.000112437	9.94021e-05	8.66259e-05	9.1346e-05	9.6891e-05	9.36765e-05	9.15518e-05	7.75681e-05	7.85103e-05	9.02168e-05	8.1264e-05	8.89521e-05	7.17781e-05	7.92302e-05	7.5247e-05	8.36242e-05	8.61695e-05	7.43753e-05	7.19774e-05	6.5466e-05	7.10186e-05	6.89009e-05	7.1219e-05	6.67896e-05	6.49614e-05	7.80236e-05	7.84811e-05	7.21653e-05	6.18489e-05	6.01254e-05	6.04711e-05	5.8022e-05	6.10677e-05	5.81086e-05
Neuron_476	0.000918545	0.000827971	0.000772356	0.000650181	0.00060359	0.000533762	0.00047424	0.000446203	0.000384326	0.000372199	0.000408834	0.000345142	0.000328077	0.000347582	0.000366319	0.000355382	0.000342574	0.000301887	0.000305928	0.000311201	0.000274413	0.000300667	0.000273811	0.000271402	0.000321934	0.000296715	0.000314417	0.000243555	0.000285938	0.000263454	0.000258881	0.000304818	0.000280993	0.000254714	0.000267021	0.000261678	0.000245242	0.000226121	0.000239211	0.000218695	0.000268104	0.000268714	0.0002625	0.00020222	0.000215852	0.00021391	0.000203918	0.000210195	0.000204184
Neuron_477	0.00061247	0.000575955	0.000533046	0.000422488	0.000345718	0.000332207	0.00028832	0.000263532	0.000225275	0.000230761	0.00023412	0.000213292	0.000202128	0.000224978	0.00024969	0.000211867	0.000209063	0.000166094	0.000182801	0.000182558	0.000177274	0.000173568	0.000170285	0.000160343	0.000183278	0.000160433	0.000158459	0.00013504	0.000168641	0.000139381	0.000171136	0.000168911	0.000134695	0.000148789	0.000128277	0.000144396	0.000123237	0.00013694	0.000139111	0.000110449	0.000157499	0.000155946	0.000136708	0.000120909	0.000119688	0.000124754	0.000113301	0.000123506	0.000121942
Neuron_478	0.000390362	0.000355082	0.000332571	0.000254125	0.00021974	0.00019211	0.000167386	0.000157052	0.00013845	0.000138507	0.000136669	0.000124352	0.000104923	0.000117408	0.000108569	0.000118702	0.000111654	0.000112672	0.000108525	0.000107989	9.88824e-05	0.000108026	8.56565e-05	9.02932e-05	0.000115734	9.53346e-05	0.000111587	8.32034e-05	9.37221e-05	8.97722e-05	8.07004e-05	9.76654e-05	9.07304e-05	8.07538e-05	8.34638e-05	8.82517e-05	7.88522e-05	7.4696e-05	8.32576e-05	7.92837e-05	8.51637e-05	9.74027e-05	9.31029e-05	7.38684e-05	7.84723e-05	6.62772e-05	6.91757e-05	7.27209e-05	6.34631e-05
Neuron_479	0.00041381	0.000397763	0.000337641	0.000257808	0.000197295	0.000181391	0.000152758	0.000138161	0.000117113	0.000110172	0.000106115	9.6077e-05	8.88665e-05	9.89566e-05	0.000105089	9.75632e-05	7.93187e-05	7.27916e-05	8.16679e-05	8.57105e-05	8.14447e-05	7.77477e-05	7.20912e-05	6.6393e-05	8.03454e-05	7.10174e-05	7.35543e-05	6.04632e-05	6.24873e-05	6.07228e-05	6.62442e-05	6.89723e-05	6.42912e-05	5.80899e-05	5.07983e-05	5.65507e-05	5.9166e-05	5.28601e-05	6.36539e-05	5.00381e-05	6.65761e-05	5.84475e-05	5.58916e-05	5.23201e-05	5.25351e-05	4.58249e-05	4.31357e-05	5.08708e-05	4.58794e-05
Neuron_480	0.00045652	0.000411864	0.000423287	0.000304256	0.000235284	0.000227068	0.00020305	0.000184289	0.000155829	0.000159029	0.000161768	0.000145084	0.000130277	0.000144738	0.000152669	0.000139168	0.000128861	0.000115095	0.000125848	0.000126442	0.000119987	0.000109505	0.000109791	0.000100651	0.000127651	0.000106125	0.000114575	9.68539e-05	0.000104283	9.35095e-05	0.000106287	0.000107421	9.45495e-05	9.12189e-05	8.61079e-05	9.40921e-05	8.71842e-05	8.47077e-05	9.49428e-05	7.40936e-05	0.000106843	0.000102987	9.2615e-05	8.08124e-05	8.14847e-05	7.63878e-05	7.17246e-05	8.11043e-05	7.77318e-05
Neuron_481	0.000381333	0.000368174	0.000307838	0.00025136	0.000213171	0.000199518	0.000168461	0.000165273	0.00014489	0.000145397	0.000151485	0.000130802	0.000121965	0.000124776	0.000126206	0.00012775	0.00012123	0.000115956	0.00011382	0.000117575	0.000106776	0.000104559	9.62066e-05	0.000100039	0.000110515	0.00010716	0.000114635	8.52088e-05	0.00010134	9.57942e-05	9.53004e-05	0.000101977	9.478e-05	9.30667e-05	8.65291e-05	9.47153e-05	8.09407e-05	8.24766e-05	8.53256e-05	8.38099e-05	9.58612e-05	0.000107283	9.40821e-05	6.98237e-05	7.27087e-05	7.54631e-05	7.38394e-05	7.44797e-05	7.11156e-05
Neuron_482	0.00039913	0.000418323	0.000333246	0.000267949	0.000220912	0.000204527	0.000170392	0.000162377	0.000138446	0.000138531	0.000127617	0.000117321	0.000111978	0.000118717	0.000122296	0.000124567	0.000110009	9.74632e-05	0.000100014	0.000105138	9.64385e-05	9.2286e-05	8.6634e-05	8.68126e-05	0.00010295	9.85246e-05	9.57462e-05	7.53003e-05	9.09192e-05	8.28274e-05	8.56317e-05	9.78231e-05	8.04333e-05	7.46698e-05	7.52987e-05	8.39385e-05	7.38037e-05	7.63854e-05	7.70066e-05	7.03358e-05	8.41843e-05	9.27704e-05	8.13955e-05	6.39493e-05	6.77195e-05	6.2981e-05	6.65039e-05	7.10511e-05	6.35942e-05
Neuron_483	0.000490195	0.000446621	0.00042591	0.000310237	0.000271946	0.000233622	0.000204481	0.00019092	0.000172355	0.000156962	0.000177687	0.00016474	0.000148589	0.000172354	0.000200525	0.000148181	0.000149721	0.000126683	0.000146757	0.000149206	0.000131958	0.000143743	0.000135849	0.000124262	0.000129582	0.000121733	0.000129617	0.00011434	0.000122225	0.000119108	0.000121029	0.000127956	0.000126179	0.000114078	0.000107248	0.000111938	0.000113996	0.000101967	0.000114394	9.70152e-05	0.000122714	9.66085e-05	9.90375e-05	9.50736e-05	0.000103214	9.93994e-05	7.60142e-05	8.85332e-05	8.71881e-05
Neuron_484	0.000499145	0.000473535	0.000431024	0.000369452	0.000328511	0.000310951	0.000268413	0.000247755	0.000222213	0.000235714	0.000237223	0.000213725	0.00019743	0.000218932	0.000235191	0.000206882	0.000209897	0.000173505	0.000185604	0.000187626	0.000174632	0.00016883	0.000162162	0.000162854	0.000182571	0.000160002	0.000167453	0.000134482	0.000167432	0.000142045	0.000172434	0.000164248	0.000141236	0.000152987	0.000129763	0.000154315	0.000127667	0.000146516	0.000141166	0.000120353	0.000155604	0.000160644	0.000144818	0.000118528	0.00012136	0.000127204	0.000119014	0.000128281	0.000120046
Neuron_485	0.000643839	0.000490181	0.000465143	0.000343822	0.000313173	0.000262604	0.000240062	0.000219509	0.00018542	0.000194565	0.000183534	0.000170891	0.000162815	0.000172057	0.00015773	0.000164709	0.000145509	0.000141121	0.000146264	0.000167397	0.000156196	0.000157804	0.000129386	0.00013368	0.000136233	0.000132587	0.000155359	0.000109279	0.000122231	0.000132387	0.000124462	0.000129775	0.000132637	0.000115743	0.000110287	0.000124821	0.00011084	0.000111606	0.000114063	0.000115092	0.000120549	0.00011626	0.000121642	0.0001086	0.000102009	9.74309e-05	8.69405e-05	9.67116e-05	8.39176e-05
Neuron_486	0.000708065	0.000585712	0.00051463	0.000376554	0.000291949	0.000261352	0.000220035	0.000212738	0.000185514	0.000170472	0.000175747	0.000160377	0.000135491	0.000149177	0.000159398	0.000142953	0.000126329	0.000129249	0.000136682	0.000140867	0.000124987	0.000136759	0.000119341	0.00011108	0.000128236	0.000109035	0.000132616	0.000108572	0.000105223	0.000111291	0.000106931	0.000110079	0.000117538	0.000102416	9.66501e-05	9.63301e-05	9.57886e-05	7.92859e-05	0.000101418	9.50267e-05	0.000111716	0.000102102	0.000104062	8.83843e-05	8.31838e-05	8.16724e-05	7.16207e-05	8.16961e-05	7.83392e-05
Neuron_487	0.00046156	0.000418161	0.000373397	0.000335277	0.000278839	0.000245535	0.000207533	0.00019821	0.000183723	0.000155514	0.000183854	0.000171089	0.000161739	0.000170586	0.000206799	0.000160648	0.000156049	0.000129703	0.000149675	0.000153516	0.000126762	0.000131989	0.000139816	0.00012527	0.000137733	0.000129409	0.000136124	0.000112011	0.000128322	0.000118969	0.00012939	0.000130615	0.000125102	0.000124071	0.000119052	0.000116426	0.000106343	0.000104465	0.000110614	9.60803e-05	0.000125979	0.000109919	0.000105779	8.33045e-05	9.41568e-05	0.000108911	7.81946e-05	9.48328e-05	9.32461e-05
Neuron_488	0.0005713	0.000514086	0.000461862	0.000341773	0.000266568	0.000243811	0.000210783	0.000196691	0.000181455	0.000162562	0.000178045	0.000160791	0.00014483	0.00017631	0.000205027	0.00014972	0.000145755	0.00012165	0.000141851	0.000144514	0.000129803	0.000139166	0.000134206	0.000121346	0.000125698	0.000113476	0.000122322	0.00011107	0.000118692	0.000110144	0.000122156	0.000124872	0.000113422	0.000107576	9.54827e-05	0.000101345	0.000102908	9.6288e-05	0.000110259	8.899e-05	0.000121357	9.7879e-05	9.50731e-05	8.93356e-05	9.55835e-05	9.20091e-05	7.36087e-05	8.72956e-05	8.45949e-05
Neuron_489	0.00037461	0.000388046	0.000359754	0.000237247	0.000202109	0.000169278	0.000154367	0.000152686	0.000123013	0.000116377	0.000127327	0.000114254	0.000106286	0.000120028	0.000135891	0.000111589	0.000107109	9.28163e-05	0.00010041	0.000106856	9.91053e-05	0.000104209	9.21051e-05	8.6522e-05	8.60551e-05	8.8442e-05	8.9668e-05	8.49081e-05	8.91745e-05	8.49979e-05	8.24279e-05	8.94816e-05	8.37777e-05	7.47316e-05	7.17533e-05	8.42311e-05	8.01901e-05	7.41532e-05	8.90102e-05	6.73222e-05	8.72753e-05	6.91701e-05	6.85922e-05	7.3753e-05	7.898e-05	6.39258e-05	5.90352e-05	6.38534e-05	5.90092e-05
Neuron_490	0.000746472	0.000584091	0.000550937	0.000429691	0.000380684	0.000317785	0.000280352	0.000272942	0.000230982	0.000228204	0.000234547	0.000202104	0.000189377	0.000199987	0.00020218	0.000201705	0.00018558	0.000170063	0.000174004	0.000190787	0.000169342	0.000178981	0.00015983	0.000159229	0.000169654	0.000161935	0.000185428	0.000136911	0.000154984	0.000158102	0.00014632	0.000168389	0.000164556	0.000150201	0.000142886	0.000146804	0.000136996	0.000131497	0.000132378	0.000139314	0.000143485	0.000143501	0.000148745	0.000116873	0.00011824	0.000125765	0.000109476	0.000114486	0.000111692
Neuron_491	0.000419335	0.000395755	0.000357688	0.000262524	0.000214549	0.000193	0.000177051	0.000166914	0.000134922	0.000129211	0.000141555	0.000122887	0.000110287	0.000115608	0.000109911	0.000122931	0.000108873	0.00010579	0.000106534	0.000108821	9.64002e-05	0.000101016	8.61354e-05	8.46773e-05	0.000111994	9.88882e-05	0.000109908	8.32833e-05	9.08788e-05	8.48956e-05	8.11124e-05	9.0239e-05	8.66301e-05	7.69565e-05	8.07509e-05	8.49182e-05	7.77493e-05	7.22449e-05	8.36693e-05	6.90321e-05	8.5299e-05	8.66444e-05	8.25206e-05	6.98573e-05	7.43307e-05	6.33067e-05	6.29875e-05	6.98391e-05	6.64023e-05
Neuron_492	0.000453939	0.000464212	0.000401712	0.000285558	0.000241951	0.00021062	0.000167346	0.000169591	0.000149383	0.000139297	0.000156201	0.000137153	0.000120357	0.000137984	0.00015198	0.000125936	0.000123954	0.000117371	0.000120899	0.000113636	0.00011414	0.000121974	9.76593e-05	0.000103049	0.000114355	0.00010087	0.000109534	9.56835e-05	0.000102693	0.000100244	9.5535e-05	0.000110345	0.000101313	8.67446e-05	8.31026e-05	9.79692e-05	9.07214e-05	8.4588e-05	0.000103486	8.53302e-05	9.73162e-05	8.84691e-05	8.90173e-05	8.32729e-05	9.10687e-05	6.93763e-05	7.19292e-05	7.45738e-05	7.25496e-05
Neuron_493	0.000394951	0.000428727	0.000365299	0.000284827	0.000219713	0.000198092	0.000152989	0.000151319	0.000138569	0.000115614	0.000138148	0.000114405	0.000101571	0.000110688	0.000129856	0.000118389	0.000101062	9.81437e-05	0.000101354	9.90326e-05	8.90069e-05	9.56708e-05	8.4297e-05	8.70684e-05	0.000109482	8.81508e-05	0.000101359	7.82591e-05	8.23384e-05	8.04063e-05	8.25519e-05	9.70543e-05	8.79733e-05	7.68923e-05	7.32006e-05	8.09484e-05	7.58352e-05	6.83092e-05	8.2321e-05	6.82913e-05	8.55983e-05	7.89187e-05	7.72254e-05	6.37648e-05	7.00865e-05	6.31792e-05	5.7886e-05	6.8862e-05	6.69087e-05
Neuron_494	0.000493334	0.000484157	0.000410679	0.000290284	0.000232631	0.000201198	0.000165854	0.000159569	0.000143722	0.000141687	0.000141322	0.000123416	0.000110032	0.000120682	0.000121096	0.000114505	0.000100053	0.000104352	0.000106003	0.000114022	0.000106838	0.000111145	9.35858e-05	9.01626e-05	0.000106408	9.25838e-05	0.000111995	7.40544e-05	8.19172e-05	9.49907e-05	8.92478e-05	9.65292e-05	9.27797e-05	8.46438e-05	7.42314e-05	8.82785e-05	7.65867e-05	7.48436e-05	8.23617e-05	7.96363e-05	8.56809e-05	8.9286e-05	8.68116e-05	7.25993e-05	7.03751e-05	6.74879e-05	6.22183e-05	7.20788e-05	6.44077e-05
Neuron_495	0.000635955	0.000584582	0.000508123	0.00035733	0.000301291	0.000262795	0.00021665	0.000208682	0.000177112	0.000163897	0.000170537	0.00014647	0.000143472	0.000143209	0.000172719	0.000162965	0.000125552	0.000118137	0.00012285	0.000149522	0.000121135	0.000122529	0.000121039	0.000117195	0.000119928	0.00012079	0.000137501	0.000102202	0.000106525	0.000107941	9.66856e-05	0.000122487	0.000118544	0.000102788	9.92378e-05	0.000107932	9.90246e-05	8.9685e-05	9.59429e-05	0.000103981	9.75932e-05	9.02045e-05	9.9268e-05	7.7842e-05	8.23848e-05	8.61238e-05	6.76643e-05	8.66518e-05	7.22093e-05
Neuron_496	0.000341582	0.00035155	0.000309577	0.000236511	0.000184249	0.000151014	0.000120592	0.000113709	0.000106725	8.6181e-05	9.86676e-05	8.73422e-05	7.58414e-05	8.30015e-05	0.000103983	8.79793e-05	6.68932e-05	6.42798e-05	7.312e-05	7.32651e-05	6.96229e-05	7.05303e-05	6.44818e-05	6.40643e-05	6.97099e-05	6.20624e-05	7.25225e-05	5.38709e-05	5.30345e-05	6.0688e-05	6.32445e-05	6.88194e-05	6.21034e-05	5.57306e-05	4.97585e-05	5.36138e-05	5.35361e-05	5.01294e-05	5.34768e-05	4.9081e-05	5.70345e-05	4.93643e-05	4.72646e-05	4.3197e-05	4.53702e-05	4.54662e-05	3.42792e-05	4.97307e-05	4.32138e-05
Neuron_497	0.00033968	0.00036785	0.000337929	0.000255167	0.000212486	0.00019972	0.000176655	0.000174244	0.00014915	0.000137137	0.000161711	0.000136763	0.000115336	0.000121172	0.000129624	0.000135825	0.000128376	0.000122597	0.000120857	0.000118437	0.000100387	0.000108363	9.77161e-05	9.86462e-05	0.000133297	0.000111521	0.000125884	0.000101227	0.000108491	9.36739e-05	9.06306e-05	0.000108538	9.88534e-05	9.23949e-05	0.000102483	9.86549e-05	9.01881e-05	7.74285e-05	9.66874e-05	7.92505e-05	0.000101009	0.000105536	9.6211e-05	7.58764e-05	8.42889e-05	7.62006e-05	7.29459e-05	8.10827e-05	8.09647e-05
Neuron_498	0.000328044	0.000312788	0.00027463	0.000226898	0.000181945	0.000177268	0.000147553	0.00013733	0.000122691	0.000120727	0.000118455	0.000110838	0.000102641	0.000114725	0.000126542	0.000108749	0.00010492	8.81455e-05	9.39467e-05	9.32111e-05	8.64456e-05	8.30714e-05	8.71959e-05	8.4284e-05	9.41901e-05	8.6253e-05	8.41151e-05	7.19068e-05	8.72499e-05	7.49134e-05	8.44402e-05	8.90082e-05	7.00979e-05	7.38908e-05	7.12352e-05	7.71196e-05	6.36614e-05	6.96071e-05	7.12219e-05	6.04658e-05	8.03712e-05	7.96214e-05	7.31038e-05	5.71879e-05	6.22694e-05	6.39363e-05	6.0064e-05	6.6275e-05	6.2145e-05
Neuron_499	0.000273358	0.000220861	0.000166614	0.000130004	0.000109189	9.73633e-05	7.45779e-05	8.18372e-05	6.91191e-05	5.59928e-05	7.3555e-05	6.50449e-05	5.6491e-05	5.74079e-05	6.94615e-05	6.08553e-05	5.35196e-05	5.26167e-05	5.67443e-05	5.59881e-05	4.697e-05	5.11587e-05	5.08481e-05	4.86685e-05	5.26866e-05	4.68076e-05	5.33946e-05	4.50162e-05	4.47017e-05	4.74642e-05	4.28395e-05	4.93546e-05	4.69166e-05	4.26074e-05	4.64164e-05	4.65022e-05	3.79209e-05	3.33328e-05	4.27163e-05	4.07248e-05	4.35822e-05	4.0406e-05	4.0177e-05	3.28533e-05	3.42117e-05	3.55929e-05	2.91587e-05	3.37939e-05	3.58954e-05
Neuron_500	0.000574333	0.000481759	0.000474141	0.000331689	0.000283778	0.000243447	0.00021507	0.000192086	0.000145665	0.000154991	0.000152633	0.00013178	0.000127739	0.00013894	0.000142464	0.000132939	0.000117533	0.000108982	0.000111381	0.000120314	0.000121698	0.000121395	9.16934e-05	9.16511e-05	0.000108013	9.15588e-05	0.000109267	9.68886e-05	9.26781e-05	9.43499e-05	9.54744e-05	0.000100505	9.76722e-05	8.50085e-05	7.423e-05	9.33858e-05	9.72215e-05	9.78392e-05	9.12979e-05	7.58522e-05	9.08e-05	6.73219e-05	7.81218e-05	8.23075e-05	9.06108e-05	7.26198e-05	6.88649e-05	7.53379e-05	6.7143e-05
Neuron_501	0.000419238	0.00040375	0.000327958	0.000235845	0.000212165	0.000190233	0.000163881	0.000160894	0.00013517	0.000136741	0.000130428	0.000113856	0.000108732	0.000111966	0.000114584	0.0001243	0.000105144	9.96286e-05	9.88501e-05	0.000109827	9.55014e-05	0.00010421	9.16816e-05	9.05511e-05	0.000100785	9.68893e-05	0.000102593	8.11031e-05	8.84684e-05	9.22494e-05	8.37139e-05	0.000100363	9.14954e-05	8.25799e-05	8.5055e-05	8.24849e-05	7.90795e-05	7.42119e-05	7.14565e-05	7.98065e-05	8.28304e-05	9.04381e-05	8.59388e-05	6.70802e-05	6.72033e-05	6.95091e-05	6.6524e-05	6.82096e-05	6.37149e-05
Neuron_502	0.000381868	0.000426018	0.000356951	0.00028934	0.000235412	0.000217242	0.000181548	0.000177467	0.000156347	0.000148539	0.000152156	0.000137878	0.000119358	0.000125291	0.000133861	0.000136069	0.000127532	0.000120174	0.000119129	0.000119363	0.0001083	0.000107222	9.84236e-05	0.000102263	0.000127333	0.000113302	0.000123092	9.26026e-05	0.000105926	9.93688e-05	9.6277e-05	0.000109325	9.52962e-05	8.7753e-05	9.59407e-05	0.000101049	8.41782e-05	8.14501e-05	9.45127e-05	8.09186e-05	0.000100626	0.000110581	9.614e-05	7.56924e-05	7.98792e-05	7.33461e-05	7.43344e-05	8.31175e-05	7.86531e-05
Neuron_503	0.000373923	0.000329098	0.000309547	0.000238845	0.000213277	0.000200017	0.000157106	0.000160303	0.000135543	0.000134137	0.000153592	0.000131682	0.00011176	0.000128501	0.000128947	0.000130818	0.000131057	0.000126298	0.000118574	0.000116181	0.000104942	0.000114794	9.32632e-05	0.000102727	0.00012584	0.000107717	0.000118998	0.00010088	0.000111753	9.76598e-05	8.83204e-05	0.000111081	9.81317e-05	9.11497e-05	9.67267e-05	0.000106797	9.09708e-05	8.71362e-05	0.000101351	9.07588e-05	9.56342e-05	0.000100439	0.000100669	8.10174e-05	9.49184e-05	7.42643e-05	7.94691e-05	7.94214e-05	7.25822e-05
Neuron_504	0.000289869	0.000271091	0.000254233	0.000175441	0.000135965	0.000115239	0.00010665	9.45373e-05	7.59292e-05	7.48253e-05	6.95972e-05	6.48694e-05	6.44673e-05	7.29483e-05	7.06978e-05	6.22567e-05	5.54635e-05	5.09618e-05	5.53089e-05	5.73218e-05	5.75603e-05	5.79243e-05	4.91504e-05	4.57207e-05	5.41e-05	5.06237e-05	5.11057e-05	4.36666e-05	4.63399e-05	4.68425e-05	4.50165e-05	5.12173e-05	4.46804e-05	3.47915e-05	3.48672e-05	4.29731e-05	4.38365e-05	4.16614e-05	4.78534e-05	3.35567e-05	4.697e-05	3.22885e-05	3.74484e-05	4.15604e-05	4.40762e-05	3.10577e-05	3.14465e-05	3.42632e-05	3.26043e-05
Neuron_505	0.000506545	0.000438628	0.000412407	0.000324891	0.000279107	0.000257999	0.000225569	0.000201468	0.000178939	0.000184381	0.000181832	0.000165035	0.000157406	0.000168096	0.000170368	0.000155607	0.000147905	0.000131323	0.000141027	0.000149224	0.000142869	0.000136096	0.000123765	0.000123085	0.000133792	0.000128557	0.000140433	0.000101568	0.000122561	0.000117072	0.000126157	0.000130076	0.000119246	0.000113415	9.90889e-05	0.00011479	0.000102597	0.000103287	0.0001056	9.90223e-05	0.000122564	0.000122462	0.000117706	9.58567e-05	8.95711e-05	9.52946e-05	8.63501e-05	9.19823e-05	8.74231e-05
Neuron_506	0.000354306	0.000257843	0.000254909	0.000196674	0.000166024	0.000156127	0.000132137	0.000128874	0.000104735	0.000107621	0.000112483	0.000108083	9.08328e-05	0.000107354	0.000121626	9.69181e-05	0.000102356	8.92793e-05	9.38367e-05	9.13344e-05	8.51022e-05	8.84322e-05	8.191e-05	8.08166e-05	9.00927e-05	7.75087e-05	8.04765e-05	7.68916e-05	8.60056e-05	7.40305e-05	7.32864e-05	8.20762e-05	6.83003e-05	6.78833e-05	6.86286e-05	7.35763e-05	6.36477e-05	6.45747e-05	7.65762e-05	6.14641e-05	7.5735e-05	7.29657e-05	6.90453e-05	6.17299e-05	6.78958e-05	5.85316e-05	5.51679e-05	5.92633e-05	5.82788e-05
Neuron_507	0.000448722	0.000410359	0.000387276	0.000265358	0.000201846	0.000196656	0.000171719	0.000164575	0.000142979	0.000136373	0.000150118	0.000138723	0.000109646	0.000137451	0.000156442	0.000121891	0.000119395	0.000110558	0.00012314	0.000116392	0.000108833	0.000115748	0.000101251	9.42342e-05	0.000112706	9.3372e-05	0.000105946	0.000100996	9.99801e-05	9.04811e-05	9.5065e-05	0.000103135	8.67878e-05	8.42173e-05	8.01629e-05	8.99587e-05	8.79652e-05	7.83231e-05	0.000101632	7.02278e-05	0.000104526	8.97617e-05	8.04885e-05	8.04096e-05	8.68423e-05	6.91748e-05	6.57256e-05	7.43134e-05	7.26406e-05
Neuron_508	0.000865151	0.000557154	0.000518606	0.000398988	0.000347796	0.000319869	0.000276875	0.000269315	0.00019488	0.000207644	0.000203416	0.000198453	0.000181077	0.000202318	0.000185878	0.00019171	0.000184528	0.000175052	0.000172495	0.000169217	0.000164014	0.000173146	0.000143918	0.000142886	0.000186809	0.000161019	0.000154378	0.000137521	0.000154439	0.000140329	0.00012488	0.000153101	0.000123979	0.000116859	0.000125334	0.000150818	0.00012092	0.000125685	0.000147549	0.000117804	0.000136356	0.000129787	0.00013407	0.000130492	0.00013789	0.00010187	0.000111712	0.000112331	0.000109744
Neuron_509	0.000635255	0.000612685	0.0005466	0.000381983	0.000339638	0.000287497	0.000259325	0.000232259	0.000207765	0.000206799	0.000187834	0.000182234	0.000157616	0.000182595	0.000172614	0.000173256	0.000157942	0.000155046	0.000159962	0.000158552	0.000162324	0.000176702	0.000130328	0.000134403	0.000161832	0.000139509	0.00016001	0.000116845	0.000128596	0.000132544	0.000124782	0.000145573	0.000137339	0.000111661	0.000108201	0.000126081	0.000122376	0.000111364	0.000126706	0.000114028	0.000128473	0.000123426	0.000126652	0.000121736	0.000117915	9.12945e-05	9.37244e-05	0.000105403	9.01144e-05
Neuron_510	0.000603485	0.000485678	0.000467845	0.000347998	0.000311422	0.000266713	0.000234302	0.000229231	0.000193128	0.000191924	0.000198454	0.000178445	0.00015918	0.000182427	0.000189888	0.000167665	0.000164693	0.000149029	0.000155546	0.000163531	0.000149116	0.000158091	0.000141808	0.000138155	0.000147088	0.000139964	0.000155347	0.000125587	0.000138143	0.000138904	0.000127342	0.00014636	0.000140283	0.000122538	0.000121298	0.000130494	0.000121871	0.000111179	0.000129811	0.000115496	0.000131084	0.000122451	0.000125178	0.000109038	0.000112339	0.00010322	9.22007e-05	9.86155e-05	9.88086e-05
Neuron_511	0.000500395	0.000475258	0.000447705	0.000360404	0.000315276	0.000277013	0.000235508	0.000223326	0.00019929	0.000184712	0.000216641	0.000179793	0.000161136	0.000171826	0.000190295	0.000184405	0.0001695	0.000158758	0.000160773	0.000159532	0.000142756	0.0001541	0.00013228	0.000137614	0.000168747	0.000144712	0.00016613	0.00012785	0.000140124	0.000129009	0.000134678	0.000153611	0.000144073	0.000131157	0.000132549	0.000130699	0.00012684	0.000115977	0.000124102	0.000111897	0.000136138	0.000131867	0.000129318	0.000101943	0.000111228	0.00010783	9.9273e-05	0.000110725	0.000103164
Neuron_512	0.00141094	0.00129018	0.00118313	0.000985286	0.000888485	0.000857272	0.000731858	0.000668472	0.0005934	0.000633711	0.000617809	0.000552516	0.000500907	0.000568174	0.000590892	0.000566781	0.000548754	0.000472631	0.00048716	0.000494561	0.000476178	0.000466011	0.000418018	0.000435468	0.000502581	0.000435999	0.000451923	0.000367217	0.000439972	0.000387274	0.000420728	0.00045869	0.000386425	0.000401183	0.000364482	0.000400303	0.000355041	0.000374065	0.000367081	0.000344538	0.00040712	0.000451205	0.000397134	0.000330899	0.000332515	0.000329631	0.000322488	0.000325645	0.000319517
Neuron_513	0.00146794	0.00126555	0.00122121	0.000967859	0.000859482	0.000727498	0.000631841	0.000580894	0.000517991	0.00048941	0.000527033	0.000473462	0.000426522	0.000481269	0.000506291	0.000450153	0.000442244	0.000393796	0.000416949	0.000408415	0.000389147	0.000428409	0.000352956	0.000351059	0.000404215	0.00036173	0.000393976	0.000327237	0.000355727	0.000351003	0.000356001	0.000386257	0.00036596	0.000323319	0.000309976	0.000347343	0.000332651	0.000323665	0.000332739	0.000282417	0.000346493	0.000303501	0.000318476	0.000287793	0.000312437	0.000276922	0.000249333	0.000289062	0.000254614
Neuron_514	0.00167276	0.00160064	0.00154825	0.00120369	0.00101475	0.000912693	0.000818863	0.000747757	0.000658371	0.000663197	0.000679178	0.000613743	0.000545501	0.000602365	0.000584239	0.000575708	0.000554675	0.000511068	0.000533747	0.000527705	0.000502973	0.000493563	0.000440683	0.000453125	0.00055795	0.000473535	0.000531762	0.000393156	0.000449263	0.000426395	0.000448966	0.000463145	0.000426251	0.000401406	0.000379517	0.000431088	0.000379532	0.00038107	0.000418268	0.000346028	0.000441388	0.000441242	0.000423105	0.000355564	0.000365186	0.00033495	0.000324615	0.000358198	0.000342171
Neuron_515	0.00162357	0.00145241	0.00129211	0.000924568	0.000773723	0.000639713	0.000566164	0.000553268	0.000456863	0.000426918	0.000467308	0.000376981	0.000362587	0.000361766	0.000394148	0.000392302	0.000316739	0.000303932	0.000320768	0.000359845	0.000303017	0.000321256	0.000294026	0.000281648	0.00031775	0.000282529	0.000337006	0.000253173	0.000255037	0.000275239	0.000267944	0.000285819	0.000285612	0.000267612	0.000246468	0.000251101	0.000247668	0.000238564	0.000234831	0.000236029	0.000257767	0.000240786	0.00023849	0.000201503	0.000210713	0.000219065	0.000186563	0.000213449	0.000199786
Neuron_516	0.00103619	0.000967413	0.00089987	0.000783583	0.000740697	0.00065127	0.000551276	0.000529526	0.000468512	0.000451201	0.000503025	0.000426315	0.000402469	0.00043013	0.000462493	0.000438905	0.000426924	0.000384347	0.000379776	0.000385645	0.000340731	0.000371037	0.000334663	0.000339748	0.000390431	0.000361148	0.000382553	0.000304674	0.000358659	0.00032122	0.000316859	0.000378781	0.000351545	0.000323605	0.000324096	0.000323987	0.0003058	0.000282776	0.000301748	0.000285378	0.000326477	0.000332841	0.00032542	0.000244046	0.000268925	0.000268609	0.000253036	0.00025301	0.00024785
Neuron_517	0.00108151	0.00101192	0.000896368	0.000624149	0.000474406	0.000416509	0.000383216	0.000340791	0.000274687	0.000271643	0.000244415	0.000233165	0.000215631	0.000255232	0.000223388	0.0002164	0.000201502	0.000193852	0.00020343	0.000202133	0.000204745	0.00022238	0.000178939	0.00016083	0.000228591	0.000165151	0.000211752	0.000151313	0.000159368	0.000171158	0.000169347	0.000172075	0.000174048	0.000120427	0.00012248	0.00016178	0.000150066	0.000140079	0.000176644	0.000121103	0.000169275	0.000129559	0.000154303	0.000163834	0.000159061	0.000106789	0.000113716	0.000140828	0.000126313
Neuron_518	0.000653433	0.000797911	0.000598813	0.000425118	0.000321645	0.000293741	0.000233925	0.000248097	0.00020942	0.000171539	0.000201117	0.000168651	0.000146002	0.000151127	0.000188121	0.000183539	0.000146178	0.000138441	0.000145969	0.000143992	0.000126294	0.000129622	0.000128726	0.000127286	0.000157342	0.000138397	0.000156351	0.000114771	0.000121663	0.000126231	0.000115612	0.000147878	0.000115503	9.63772e-05	0.00011613	0.00011882	0.000105025	8.67273e-05	0.000114023	9.43777e-05	0.000123035	0.000118114	0.000107913	8.63564e-05	9.5069e-05	7.68397e-05	7.8913e-05	0.000103812	9.29922e-05
Neuron_519	0.00169283	0.00138748	0.00133927	0.00098841	0.000811429	0.000669051	0.000612365	0.000568448	0.000493233	0.000455975	0.000479598	0.000438197	0.000389108	0.000411334	0.000467414	0.000414836	0.000361433	0.000344974	0.000374747	0.000404003	0.00034609	0.00037472	0.000342485	0.000314015	0.000363973	0.000309084	0.000373157	0.000300412	0.000297823	0.00030532	0.000306861	0.000322899	0.000338769	0.000299275	0.00028974	0.00028487	0.000290698	0.000252081	0.000278304	0.000261505	0.000307177	0.000263278	0.000279628	0.000245378	0.000244683	0.000251006	0.000193752	0.000244165	0.000218604
Neuron_520	0.000965464	0.000837969	0.00080542	0.000488669	0.000384933	0.000317291	0.000323053	0.000275446	0.000204122	0.000223074	0.000191098	0.000180101	0.000177722	0.00021406	0.000183098	0.000164241	0.000160133	0.000140035	0.000151472	0.000154497	0.000176977	0.000174947	0.000140983	0.000131686	0.000157149	0.000139943	0.000148639	0.000114714	0.000132698	0.000141751	0.000127814	0.000143161	0.000119391	8.29521e-05	8.81455e-05	0.00012445	0.000115331	0.000111711	0.000140876	8.12369e-05	0.000134414	9.5828e-05	0.000112313	0.000133093	0.000127347	7.22367e-05	8.97869e-05	9.62877e-05	8.952e-05
Neuron_521	0.00136355	0.00118179	0.000975375	0.000727457	0.000616919	0.000562404	0.000444128	0.000442319	0.00034976	0.000352246	0.000360762	0.000327616	0.000307215	0.000337396	0.000331044	0.000341305	0.000314263	0.000286178	0.000285206	0.000288936	0.000285565	0.000285986	0.000244289	0.000249028	0.000296088	0.000266154	0.000256907	0.000221622	0.00026465	0.00023937	0.000230221	0.000283687	0.000218735	0.000200686	0.000202548	0.000262101	0.000204931	0.00022236	0.000254529	0.00019492	0.00023483	0.000217392	0.000215221	0.000207275	0.00023319	0.000170586	0.000188831	0.000191556	0.000187272
Neuron_522	0.00116036	0.00107709	0.00094652	0.000685031	0.000573799	0.000538199	0.000435522	0.000425795	0.000354537	0.000344093	0.000368839	0.000328864	0.000281982	0.000309217	0.000327516	0.00031474	0.000279655	0.000278795	0.000288364	0.000282455	0.000257196	0.000266877	0.000239542	0.000234392	0.00030802	0.00025173	0.000277399	0.000231119	0.000236514	0.00023228	0.000211256	0.000270462	0.000234307	0.000213735	0.000222764	0.000231301	0.000211724	0.00017767	0.000231053	0.000190454	0.000237345	0.000230413	0.000220221	0.000182077	0.000193813	0.000170982	0.000163223	0.000177253	0.000191184
Neuron_523	0.000875177	0.000857379	0.000785169	0.000638166	0.000550959	0.000513576	0.000433574	0.000407334	0.000346407	0.000328344	0.000372993	0.000311987	0.000287136	0.000303878	0.000313924	0.000322652	0.000297079	0.000275218	0.000276883	0.000273771	0.000244274	0.000257564	0.000227067	0.000230102	0.000308002	0.000260011	0.000284075	0.000219138	0.000246348	0.000222468	0.000221643	0.000270375	0.000239406	0.000216997	0.000226867	0.000234487	0.000215683	0.000201453	0.000218124	0.000185836	0.000233216	0.000225088	0.000225685	0.000177323	0.000198676	0.000181174	0.000177188	0.000189559	0.00018675
Neuron_524	0.00106137	0.000912299	0.000808684	0.000655802	0.00053721	0.000489077	0.00043969	0.000401173	0.000343046	0.000334787	0.000324629	0.000319127	0.000274797	0.000302495	0.000299412	0.000296096	0.000274175	0.000260049	0.000276414	0.000263169	0.00025098	0.000257417	0.000234094	0.0002199	0.000301149	0.000240676	0.000261811	0.000199787	0.000221715	0.000214223	0.000221211	0.00023182	0.000209285	0.000199878	0.00019941	0.000222419	0.000182368	0.000183937	0.000210116	0.000169677	0.000219672	0.000218244	0.000209218	0.000184856	0.000179079	0.000166886	0.000161638	0.000187629	0.000178527
Neuron_525	0.00162302	0.00138775	0.00129774	0.00100759	0.000746778	0.000665437	0.000541102	0.000528161	0.000464556	0.000417338	0.000481211	0.00040371	0.000376543	0.000403262	0.000495586	0.000403724	0.000359336	0.000304137	0.000337391	0.000356546	0.000317665	0.000310066	0.000322196	0.000294738	0.000310923	0.000288316	0.000321449	0.000253071	0.000294967	0.000283308	0.000319497	0.000317293	0.000260677	0.000282543	0.0002478	0.000267054	0.000234702	0.00025331	0.000257898	0.000201903	0.000291866	0.00026844	0.00023482	0.000197385	0.000219248	0.000236049	0.00018509	0.000228122	0.000215643
Neuron_526	0.000909542	0.000737145	0.000689104	0.000554102	0.000459606	0.0004101	0.000345246	0.000325942	0.000291027	0.000296663	0.000298242	0.000253961	0.000230996	0.000244653	0.000241638	0.000249566	0.000225808	0.000226626	0.000219739	0.000230413	0.000219479	0.000212626	0.000185172	0.000197339	0.000220498	0.000204239	0.000236217	0.000165297	0.00019086	0.000194613	0.000188904	0.000210089	0.000190052	0.000180058	0.000173811	0.000182449	0.000162213	0.000163928	0.00016636	0.000167618	0.000182998	0.00020458	0.000186817	0.00014456	0.000144405	0.000147279	0.000144035	0.000148511	0.000140156
Neuron_527	0.000881758	0.000831167	0.000732583	0.000596042	0.000525125	0.000503846	0.0004083	0.000396947	0.000337089	0.000358698	0.000361217	0.000315272	0.000285541	0.000304267	0.00033594	0.000320328	0.000309555	0.00027591	0.000272585	0.000277941	0.00026512	0.000246964	0.000238455	0.000252708	0.000290134	0.000246146	0.000272312	0.000220441	0.000248255	0.00022968	0.00023274	0.000264068	0.000222193	0.000226493	0.000218478	0.000231445	0.000198866	0.000197921	0.00021785	0.000196097	0.000232615	0.000246567	0.000217974	0.000174542	0.000183224	0.000182921	0.00017585	0.000171908	0.00018492
Neuron_528	0.00130092	0.000909061	0.00089645	0.000706033	0.000601306	0.000544725	0.000460269	0.000454177	0.000375996	0.000349408	0.000398186	0.000385956	0.000328508	0.000367529	0.000409482	0.000342036	0.000349884	0.000315556	0.00033692	0.00032007	0.000290408	0.00031912	0.00027927	0.000278643	0.000315147	0.000276616	0.000299325	0.0002728	0.000287707	0.000266111	0.00025591	0.000283945	0.000254295	0.000237389	0.000250856	0.00027172	0.000234474	0.000232314	0.000267038	0.000228698	0.000262419	0.000231721	0.000239818	0.000220624	0.000245861	0.00021213	0.000185833	0.0002158	0.000197575
Neuron_529	0.0010368	0.00110329	0.00101984	0.0008011	0.000634861	0.000607442	0.000514097	0.000500794	0.00043761	0.000404846	0.000467319	0.000414508	0.000367568	0.000398727	0.000469317	0.000402303	0.000380735	0.00034498	0.000358229	0.000355089	0.00032172	0.000319408	0.000316683	0.000306032	0.000354622	0.000296254	0.000337006	0.000301966	0.000313558	0.000282351	0.000299037	0.000308132	0.000281777	0.000277611	0.000277494	0.000284228	0.000252568	0.000251204	0.000286424	0.000230938	0.000301118	0.000274617	0.000256583	0.000218629	0.000245631	0.000236743	0.000201499	0.000226311	0.000233948
Neuron_530	0.000996394	0.00102772	0.000950463	0.000765971	0.000690355	0.000649549	0.000558421	0.000532907	0.000451962	0.000467654	0.000454606	0.000405987	0.000368201	0.000392284	0.000381878	0.000413415	0.000375295	0.000373727	0.000354264	0.000364575	0.000339625	0.000346056	0.000296973	0.000311915	0.000399342	0.000338855	0.000375323	0.000277418	0.000316823	0.000303631	0.000269502	0.000350615	0.000304387	0.000282914	0.000292414	0.000297121	0.000263942	0.000242553	0.000273072	0.000265693	0.000294495	0.000333931	0.00031086	0.000237443	0.000242541	0.000227709	0.000234023	0.000231247	0.000233595
Neuron_531	0.000619243	0.000521991	0.000429858	0.000326682	0.000273306	0.000219681	0.000172253	0.000170201	0.00015131	0.000126222	0.000151881	0.000131181	0.000124908	0.000123334	0.000155989	0.000131775	0.000104141	9.94564e-05	0.000110231	0.000121871	0.000103093	0.000104929	0.000101538	0.000103848	9.89035e-05	9.85992e-05	0.000113344	8.88175e-05	8.54086e-05	9.55563e-05	9.03831e-05	0.000102213	9.75761e-05	9.09087e-05	8.82126e-05	8.64746e-05	8.35928e-05	7.7001e-05	7.92957e-05	8.13287e-05	8.29457e-05	6.84501e-05	7.6172e-05	6.26704e-05	6.71404e-05	7.49904e-05	5.29152e-05	7.01587e-05	6.24286e-05
Neuron_532	0.000966158	0.000919319	0.000745339	0.00052564	0.000449687	0.000376792	0.000329122	0.000304808	0.000273302	0.000255674	0.000255883	0.000232106	0.000225173	0.000242138	0.000241482	0.000229995	0.000207989	0.000186814	0.000201697	0.000230249	0.000198087	0.00021785	0.000193088	0.000183561	0.000197324	0.000179345	0.000209677	0.000145825	0.000168413	0.000178482	0.000176385	0.000183171	0.000186192	0.000159557	0.000156312	0.000171777	0.000151777	0.000145248	0.000162488	0.000149255	0.000168291	0.000152387	0.000162939	0.000144969	0.0001427	0.000136113	0.00011542	0.000139605	0.000122174
Neuron_533	0.000614789	0.000489776	0.000455161	0.00037312	0.000355004	0.000298947	0.000265921	0.000249345	0.000213459	0.000208434	0.000220768	0.00019074	0.000183738	0.000191016	0.000202523	0.000195673	0.000179146	0.000156442	0.000164287	0.000181937	0.000157954	0.000164616	0.000153529	0.000152537	0.000163592	0.000157766	0.000170967	0.000133714	0.000151155	0.000142321	0.000144089	0.000162162	0.000157024	0.000148362	0.000145379	0.000134948	0.000133555	0.000126667	0.000125196	0.000130923	0.000141637	0.000135501	0.000137136	0.000107453	0.00011458	0.000125383	0.000105508	0.000109677	0.000108258
Neuron_534	0.00160123	0.00148901	0.00152166	0.00106557	0.000820716	0.000747464	0.000684787	0.000625737	0.000524158	0.000497092	0.000564479	0.000488686	0.000401452	0.000444688	0.000478377	0.000484449	0.00042202	0.000406168	0.000428549	0.000421768	0.000377193	0.000392819	0.000346928	0.000324322	0.000454176	0.000349409	0.000423562	0.000346424	0.000345993	0.000315754	0.00033194	0.000367219	0.000324987	0.000303202	0.000315434	0.000316492	0.00031547	0.000284231	0.000328861	0.000256529	0.000348149	0.000326062	0.000302188	0.000271863	0.000301031	0.000253946	0.000226447	0.000284967	0.000261767
Neuron_535	0.000718821	0.000736377	0.000582165	0.000421411	0.000340077	0.000303564	0.000262883	0.000244145	0.000213395	0.000185047	0.000201599	0.000179499	0.000161825	0.000183912	0.000219572	0.000185794	0.000155278	0.000133875	0.000152892	0.000159599	0.000147353	0.000155829	0.000140302	0.000129208	0.000146531	0.000119751	0.000144979	0.000111048	0.000120601	0.00011851	0.000137625	0.000134993	0.000122605	0.000114866	0.000101045	0.000111948	0.000110891	0.000106702	0.000113562	9.45531e-05	0.000121484	0.000105408	0.000100867	0.000100085	0.000101739	9.53701e-05	7.73061e-05	0.000108973	8.75973e-05
Neuron_536	0.000849759	0.000852748	0.000753212	0.000608924	0.000560493	0.000512536	0.000432744	0.000415524	0.000364536	0.00037341	0.000356485	0.000322287	0.000295278	0.000322068	0.000307504	0.000338061	0.000315329	0.000306155	0.000287222	0.000292087	0.000274106	0.00029686	0.000243474	0.00025465	0.000310633	0.000272081	0.000295824	0.000219867	0.000271576	0.000248325	0.000216471	0.000294043	0.000259024	0.000228198	0.000231765	0.000247508	0.00022162	0.000207108	0.000229387	0.000227492	0.000235268	0.000272173	0.000258953	0.000200102	0.000212201	0.00018732	0.000202159	0.000187626	0.000182097
Neuron_537	0.000703821	0.000713833	0.00063809	0.000549721	0.000484788	0.000462595	0.000356749	0.00035418	0.000309532	0.000279218	0.00034522	0.000294027	0.000251854	0.00027046	0.00031286	0.00028961	0.000277349	0.000258992	0.000265697	0.000244257	0.000224245	0.000237363	0.000207559	0.000221175	0.000273039	0.000232701	0.000254192	0.000216489	0.000230521	0.000206926	0.000205805	0.000256614	0.000221728	0.000211537	0.000215507	0.000224095	0.000199024	0.000182756	0.000208824	0.000178112	0.000222261	0.000216386	0.00020755	0.00016125	0.000183653	0.000173022	0.000163804	0.000173765	0.000173856
Neuron_538	0.00138978	0.00141505	0.0012372	0.000994278	0.000814363	0.000766818	0.000630635	0.000595158	0.000500644	0.000511762	0.000525652	0.000459949	0.000442218	0.000477257	0.000545924	0.000467414	0.000449733	0.00035735	0.000387697	0.000395797	0.000381816	0.000370329	0.000355463	0.000347615	0.000397664	0.000348798	0.000363238	0.000280081	0.000354354	0.000305478	0.000359052	0.000372176	0.00029936	0.00032039	0.000274885	0.000315471	0.000274201	0.000292542	0.000301885	0.000249751	0.000337551	0.00034572	0.000299211	0.000254717	0.000250736	0.000261057	0.000246474	0.000263597	0.000261445
Neuron_539	0.00104694	0.000862246	0.000833267	0.000673715	0.000559488	0.000538911	0.000469751	0.000462665	0.000377219	0.000361903	0.000400511	0.000361486	0.000299361	0.00031268	0.000344734	0.00035083	0.000319489	0.000322773	0.000316786	0.000307493	0.000274374	0.000276298	0.000261481	0.000252141	0.000348355	0.000270166	0.000316952	0.000265179	0.000262915	0.000239921	0.000240399	0.000259679	0.000239088	0.000244354	0.000254909	0.000260989	0.00021746	0.000208848	0.000238803	0.000203086	0.000249271	0.000254396	0.000235384	0.000194493	0.000208358	0.000202811	0.000183862	0.000212838	0.000214955
Neuron_540	0.000714512	0.000663773	0.000564827	0.000419231	0.000342657	0.000290451	0.00026444	0.00024673	0.000193947	0.000191127	0.000184518	0.000171562	0.000168228	0.000174832	0.000147204	0.000173106	0.000152969	0.000150203	0.000147812	0.000158791	0.000144251	0.000141788	0.000133066	0.00012279	0.000165422	0.000149057	0.000153549	0.000107311	0.000129873	0.000124645	0.000112175	0.00013189	0.000121911	9.97814e-05	0.000115185	0.000131877	0.000101891	0.00010255	0.000123344	0.000103096	0.000125691	0.000120464	0.000123704	0.000103964	0.000108911	8.85306e-05	9.44401e-05	9.96324e-05	9.80527e-05
Neuron_541	0.000972487	0.000879937	0.000738117	0.000585007	0.000547317	0.000483351	0.00041442	0.000405605	0.000354122	0.000338134	0.000369681	0.000316872	0.000313259	0.000321573	0.000362781	0.000321199	0.000302929	0.000260017	0.000276282	0.000306102	0.000252371	0.000281596	0.000273098	0.0002611	0.000265142	0.000258054	0.00027511	0.000226225	0.00025444	0.0002487	0.000246249	0.000274857	0.000265919	0.000254327	0.000249404	0.000229548	0.000222241	0.000201174	0.000201751	0.000226423	0.000242148	0.000231198	0.000236972	0.000178165	0.000183991	0.000214854	0.000173283	0.00017791	0.000180837
Neuron_542	0.00163709	0.0011946	0.00121861	0.0010501	0.00094702	0.000890598	0.000757038	0.000716102	0.000610017	0.000659558	0.000654442	0.000596544	0.000501332	0.000554298	0.000558418	0.000583065	0.000575767	0.000540291	0.000527686	0.000517139	0.000473889	0.00047382	0.000425131	0.000463363	0.000568974	0.000473831	0.000535605	0.000413095	0.000482343	0.000433671	0.000406316	0.000492226	0.000415933	0.000415356	0.000430921	0.000433247	0.000380595	0.000364762	0.000403632	0.000391328	0.00042575	0.00050359	0.000447393	0.000337588	0.000366834	0.00034205	0.000356206	0.000351721	0.000341174
Neuron_543	0.00115161	0.00114046	0.000916575	0.000619699	0.000544298	0.000469417	0.000380019	0.000368186	0.000304998	0.000299173	0.000304776	0.000253558	0.000235474	0.000250402	0.000288225	0.000278876	0.000206595	0.00020968	0.000215653	0.000240305	0.000216295	0.00022474	0.000191998	0.00019157	0.000218311	0.000194081	0.000220124	0.000175577	0.000165591	0.000183197	0.000168144	0.000212898	0.000197369	0.000176109	0.000161548	0.000176078	0.000173427	0.00015784	0.000160864	0.000168115	0.000170773	0.000163065	0.000156825	0.000136918	0.000142252	0.000138854	0.000123455	0.000145308	0.000134341
Neuron_544	0.00113706	0.00106804	0.000846346	0.000669739	0.00058146	0.000518759	0.000440331	0.000407505	0.000351942	0.00033857	0.000338331	0.000313559	0.000291594	0.00031961	0.000337993	0.000305145	0.000272412	0.000251737	0.00026585	0.000269602	0.000253577	0.000260115	0.000241695	0.000224539	0.000282896	0.00022613	0.000246815	0.000188235	0.000214819	0.000213298	0.000229791	0.000230026	0.000205869	0.000203757	0.0001821	0.000213889	0.000174867	0.000187538	0.000206517	0.000165455	0.000214309	0.000205806	0.000195341	0.000176418	0.000174932	0.000166687	0.000148966	0.000176666	0.000166762
Neuron_545	0.00112156	0.00107417	0.000968127	0.00065726	0.000548975	0.000484502	0.00043882	0.000396583	0.000314587	0.000333226	0.000301312	0.000278783	0.000274641	0.000302304	0.000292627	0.000264508	0.000265161	0.000234184	0.000236039	0.000249237	0.000238851	0.000256037	0.000220648	0.000207779	0.000240314	0.000216637	0.000238861	0.000192678	0.000222944	0.000213594	0.000200689	0.000237902	0.000207434	0.000170007	0.000174609	0.000196588	0.000188795	0.000169523	0.000196282	0.000165963	0.00021341	0.000183657	0.000200954	0.000178951	0.000182943	0.000147691	0.000155083	0.00014202	0.000150001
Neuron_546	0.0011592	0.00108878	0.000899954	0.000614412	0.00050933	0.00041751	0.000355566	0.000347702	0.000291374	0.000272334	0.00027866	0.000254788	0.000219559	0.00026235	0.000278824	0.000245357	0.000226832	0.000214562	0.000223258	0.000228637	0.000228372	0.00024946	0.000193417	0.000190324	0.000215583	0.000177086	0.000199466	0.000179031	0.00017962	0.000184185	0.000175636	0.000186458	0.000185295	0.000151113	0.000137857	0.000187148	0.000171832	0.000160255	0.000202529	0.000153925	0.000180318	0.000144177	0.000154568	0.000175762	0.000183915	0.000125967	0.000124945	0.00015313	0.000131793
Neuron_547	0.000898838	0.000816672	0.000819185	0.000579935	0.000451513	0.00041687	0.000381381	0.000337868	0.000277305	0.000267676	0.000283227	0.000242863	0.000220826	0.00023885	0.000247084	0.000254132	0.000212599	0.000198488	0.000211863	0.000222382	0.000199979	0.00019588	0.00018108	0.000167627	0.000231103	0.000190559	0.000207916	0.000170851	0.000173359	0.000162879	0.000168821	0.000189689	0.000163562	0.000152027	0.00015763	0.000161327	0.000158425	0.000155806	0.000160034	0.000123299	0.000176367	0.000162777	0.00015072	0.000135749	0.000147733	0.000127885	0.000117251	0.000142968	0.000130082
Neuron_548	0.00111405	0.00114741	0.000993684	0.000743833	0.000649371	0.000586595	0.000501977	0.000483489	0.000420979	0.000436689	0.000413878	0.000388851	0.00033016	0.000365044	0.000369751	0.000363678	0.000352017	0.000346839	0.000338862	0.000332472	0.000309942	0.000338084	0.000274139	0.000281593	0.00032471	0.000300207	0.000315301	0.000269114	0.000300449	0.000280067	0.000248842	0.000308528	0.000277361	0.000245052	0.000258291	0.000265257	0.000248503	0.000225609	0.000257186	0.000259914	0.000273079	0.000315694	0.000282423	0.000227162	0.000235248	0.000200222	0.000217527	0.000212403	0.000196018
Neuron_549	0.00113093	0.000893888	0.000722144	0.000587432	0.000484069	0.000416991	0.000325672	0.000322601	0.00027011	0.000256267	0.000249191	0.000218614	0.000191308	0.000224339	0.000200396	0.000225566	0.000202401	0.000202942	0.000196651	0.000200538	0.000190783	0.000206729	0.000168237	0.00017251	0.000223002	0.000170717	0.000201965	0.000145147	0.000159794	0.000163158	0.000146635	0.000172843	0.000162858	0.000137132	0.000140047	0.000168906	0.000139421	0.00013381	0.000164359	0.000142885	0.000150028	0.000154853	0.000158023	0.000147026	0.000153676	0.000111109	0.000121138	0.000135043	0.000123237
Neuron_550	0.00138975	0.00119371	0.00113726	0.000811983	0.000651987	0.000526644	0.000480289	0.00044663	0.000376124	0.000339748	0.000379967	0.00035417	0.00031921	0.000358058	0.000399715	0.000320945	0.000307607	0.00027163	0.000307261	0.000306137	0.000286124	0.000319231	0.000269916	0.000252797	0.000280382	0.000236063	0.00027918	0.000238616	0.000246775	0.00025102	0.000262413	0.000258373	0.000252558	0.000220769	0.00020451	0.000233321	0.000229922	0.000223148	0.000242705	0.000198946	0.000245701	0.000184282	0.000206345	0.000216696	0.000229313	0.000197463	0.000159135	0.000199805	0.000175439
Neuron_551	0.00090116	0.000833528	0.000848267	0.00058317	0.000475784	0.000442392	0.000408431	0.000378485	0.000298498	0.000315853	0.000320171	0.000289277	0.000255247	0.000274844	0.000278029	0.000275255	0.000260954	0.000243907	0.000251185	0.000250523	0.000232686	0.000223138	0.000207932	0.000201891	0.000257147	0.000222819	0.000239099	0.000204389	0.00021584	0.000199015	0.000194807	0.000211232	0.00018963	0.000181576	0.000182146	0.000211763	0.000184833	0.000182345	0.000206664	0.000159822	0.000209936	0.000200942	0.000182989	0.000168411	0.000184003	0.000152652	0.000151569	0.000163307	0.000162372
Neuron_552	0.00114762	0.00112002	0.000993222	0.000773258	0.000657656	0.000565805	0.000469339	0.000460365	0.000422686	0.000393342	0.000420056	0.000355866	0.000320792	0.000348378	0.000374203	0.000358583	0.000330646	0.000319009	0.00031392	0.000321902	0.000288304	0.000314689	0.000275435	0.000284575	0.000327759	0.000282294	0.000323947	0.00024529	0.000274558	0.00027016	0.000255424	0.00030743	0.000288984	0.000257646	0.000249653	0.00025581	0.000242582	0.000223269	0.000248231	0.000240602	0.000258714	0.000271321	0.000265865	0.000205477	0.000221077	0.00020897	0.000201392	0.000210684	0.000198675
Neuron_553	0.00104283	0.000849907	0.000795914	0.000593699	0.000465444	0.000439757	0.000373911	0.000397564	0.000331667	0.000282542	0.000354843	0.000318569	0.000249975	0.000261991	0.000300796	0.000294255	0.000266098	0.000282692	0.000281072	0.000270033	0.000225951	0.000234544	0.000228019	0.000225076	0.000293848	0.000243678	0.000280091	0.000243302	0.000228699	0.000215661	0.000198147	0.000231194	0.000220923	0.000205272	0.00024065	0.000225016	0.000191982	0.00015575	0.000215769	0.000188701	0.000227339	0.000227862	0.000215856	0.00016626	0.000178089	0.000173065	0.000150131	0.000180733	0.000184076
Neuron_554	0.00129065	0.00111799	0.000993911	0.00068113	0.000543873	0.000484956	0.000408886	0.000395833	0.000316335	0.000338015	0.000330544	0.000299101	0.000294283	0.000331677	0.000324688	0.000281047	0.000264288	0.000249067	0.000258154	0.000292803	0.000279163	0.000267982	0.000227107	0.000223819	0.000237946	0.00023718	0.000243066	0.000197183	0.000220856	0.000221907	0.000216296	0.000224672	0.000214264	0.00018967	0.000166359	0.000225821	0.00019663	0.000199609	0.000230109	0.000192703	0.000220724	0.000188536	0.000199353	0.000189739	0.000197796	0.00016007	0.000160255	0.00016421	0.000151813
Neuron_555	0.00111664	0.00101426	0.000972976	0.000849385	0.000768003	0.00075157	0.000643016	0.000605868	0.000531713	0.000567094	0.000572716	0.000506713	0.000461127	0.000502922	0.000501731	0.000511831	0.000501689	0.000456955	0.000451557	0.000451243	0.000418448	0.000401407	0.0003775	0.0003908	0.000485842	0.000424493	0.000446989	0.000342361	0.000420292	0.000361386	0.000368786	0.000425295	0.000364273	0.000370491	0.000359342	0.000379911	0.00032577	0.000331702	0.000342371	0.000327518	0.000378462	0.000439793	0.000390879	0.000286472	0.000306797	0.000306839	0.000314253	0.000302462	0.000300442
Neuron_556	0.001281	0.00116687	0.00110921	0.000879336	0.000722388	0.000680941	0.000550056	0.000550776	0.000478489	0.000448259	0.000550323	0.000469481	0.000402305	0.000441556	0.000481758	0.00046488	0.000441564	0.000414659	0.000416799	0.000402292	0.000355769	0.000367966	0.00033091	0.000342673	0.000427706	0.000366248	0.000408276	0.000344472	0.00037272	0.000321659	0.000331715	0.000368368	0.000310226	0.000314103	0.000320979	0.000363751	0.000294512	0.000307342	0.000338799	0.000278766	0.000343203	0.000339462	0.000324213	0.000260763	0.000308524	0.000262878	0.000257977	0.000286355	0.000259403
Neuron_557	0.00107337	0.000905226	0.000804423	0.000600925	0.000510288	0.000445687	0.000389756	0.000373986	0.000305605	0.000289562	0.00030862	0.000282845	0.000265437	0.000269787	0.000315965	0.000291904	0.000251963	0.000225361	0.000242777	0.000268454	0.000223147	0.000235225	0.000225659	0.000206245	0.000236742	0.000198004	0.000229655	0.000192964	0.000203305	0.000192802	0.00019626	0.000208581	0.000201357	0.000197224	0.000189456	0.000187908	0.000181359	0.000182408	0.000174445	0.000170395	0.000186832	0.000170413	0.000166633	0.000145905	0.000169202	0.00017325	0.000134008	0.000156072	0.000146624
Neuron_558	0.00121003	0.00100006	0.000987323	0.000758049	0.000607094	0.000580049	0.000483447	0.000454001	0.000399848	0.00040157	0.000413185	0.000358669	0.000336706	0.000354996	0.000382008	0.000342603	0.000319989	0.000299649	0.000303401	0.000329762	0.000305487	0.000290313	0.000269306	0.000270986	0.000276675	0.000278359	0.000308519	0.000237365	0.00027273	0.000255936	0.000268997	0.000287826	0.000267328	0.000261536	0.00022654	0.000245876	0.000226937	0.00021426	0.000225701	0.000229919	0.000269705	0.000280874	0.00026189	0.000202025	0.000188539	0.00021535	0.000190273	0.000190828	0.000189176
Neuron_559	0.00100802	0.000942932	0.00087583	0.000704423	0.00057112	0.000514861	0.000456675	0.000412869	0.000379752	0.000331462	0.000380731	0.000337727	0.000319018	0.000350934	0.000398628	0.000333022	0.000312851	0.000254246	0.000297651	0.000302623	0.000267071	0.000270772	0.000276769	0.000248433	0.000278886	0.00026866	0.000267836	0.000223593	0.000258876	0.000239931	0.000267022	0.000279064	0.000243276	0.000237486	0.000227023	0.000229683	0.000221802	0.000217571	0.000225746	0.00017751	0.000262317	0.000229283	0.000212596	0.000178236	0.000198926	0.000208345	0.000166118	0.000193586	0.000187905
Neuron_560	0.00063671	0.000618061	0.000582119	0.000388833	0.000318477	0.000282007	0.000234838	0.000228704	0.00017978	0.000179565	0.00019676	0.000166843	0.000144441	0.000156044	0.00017075	0.00017265	0.000145125	0.000144421	0.000144552	0.000147521	0.000137419	0.000139288	0.000117069	0.000119118	0.000158088	0.000121997	0.000145931	0.00012707	0.000120647	0.000115699	0.000108899	0.000135228	0.000115101	0.000105273	0.000109893	0.000114677	0.000112099	9.98171e-05	0.00012405	9.9735e-05	0.000119611	0.000107245	0.000103955	0.000100183	0.000109957	8.59378e-05	8.33503e-05	9.38058e-05	9.36732e-05
Neuron_561	0.00195627	0.00178482	0.00157566	0.00122225	0.00102973	0.000909987	0.000797833	0.000753268	0.000673214	0.00064487	0.000664682	0.000595084	0.000500168	0.000557679	0.000509418	0.000573272	0.000524799	0.000539327	0.000530819	0.000521839	0.000468292	0.000510462	0.000420989	0.000431472	0.00058087	0.000465423	0.000560257	0.000393489	0.000439766	0.000428652	0.000388639	0.000453682	0.000435593	0.000384992	0.000402893	0.000424519	0.000380489	0.000348586	0.000407715	0.000379071	0.000421311	0.000456454	0.000448035	0.00035683	0.000376899	0.000314406	0.000327798	0.000356681	0.000313568
Neuron_562	0.00151189	0.0014177	0.00128151	0.00105251	0.000932054	0.000816668	0.000709307	0.000654865	0.000580767	0.000548747	0.000601638	0.000510446	0.000477844	0.000515639	0.00052863	0.000523993	0.000484095	0.000449334	0.000455326	0.000456014	0.00041843	0.000451217	0.000389714	0.000395732	0.000498806	0.000422484	0.000474867	0.00034311	0.00040461	0.000377907	0.000384038	0.000443646	0.000414024	0.000363755	0.00036661	0.00038079	0.000355445	0.000331801	0.000362737	0.000317536	0.000388792	0.000381743	0.000384094	0.000309049	0.00032367	0.000303172	0.000290174	0.000321059	0.000296857
Neuron_563	0.00122531	0.00105124	0.00100956	0.000658484	0.000561548	0.000492212	0.000435986	0.00040645	0.000320916	0.000357195	0.000349734	0.000316341	0.00027907	0.000335205	0.000346459	0.000282604	0.000278288	0.000269742	0.00027423	0.000278575	0.000287339	0.000293103	0.000221151	0.000228323	0.000248935	0.000219124	0.000236059	0.000237378	0.000227878	0.00021948	0.000212256	0.000234364	0.000212848	0.000191631	0.000161509	0.000210433	0.00021563	0.000201848	0.000236691	0.000189402	0.000227977	0.000191776	0.000198811	0.000212109	0.00021604	0.000153753	0.000165424	0.000159738	0.000147863
Neuron_564	0.00142112	0.00136763	0.00128089	0.00091842	0.000693816	0.000659029	0.000580485	0.000506991	0.000422763	0.000445829	0.000405991	0.000362783	0.000353004	0.00040465	0.000411307	0.000360307	0.000341897	0.00028482	0.000308394	0.000323244	0.000315017	0.000300145	0.00029161	0.000274421	0.000318798	0.000270317	0.000292962	0.000237855	0.000272872	0.000250434	0.000292157	0.000294234	0.000240602	0.00021752	0.000202031	0.000231771	0.000221744	0.000213701	0.000243922	0.000181989	0.0002783	0.000247902	0.000241708	0.000215259	0.000206919	0.000182251	0.000186082	0.000199354	0.000198845
Neuron_565	0.000914206	0.000751828	0.000730862	0.000610361	0.000555836	0.000529556	0.000458516	0.000431687	0.000366375	0.000394494	0.00037892	0.000354344	0.000302558	0.00033324	0.000321927	0.000353453	0.000339307	0.000325083	0.000312634	0.000312101	0.000285884	0.000294757	0.000250126	0.000265463	0.000334824	0.00028243	0.000313549	0.000243656	0.000287471	0.000258589	0.000238126	0.000295644	0.000252233	0.000246369	0.000253217	0.000262064	0.000233612	0.000223903	0.000240053	0.000238231	0.000248727	0.000298801	0.000271244	0.000206936	0.000222728	0.000203606	0.000213923	0.000210824	0.000197835
Neuron_566	0.00107146	0.00100016	0.00089704	0.00064532	0.000477569	0.000410608	0.000331698	0.00032848	0.000282213	0.000249368	0.000253741	0.000223621	0.000188558	0.000201936	0.000229297	0.000224844	0.000170994	0.000182104	0.000188219	0.000201015	0.000180541	0.000187417	0.000168161	0.00015836	0.000199548	0.000165046	0.000210037	0.000141874	0.000139148	0.000160181	0.000139057	0.000171098	0.000165113	0.00013041	0.000131196	0.000151954	0.000137975	0.000111957	0.00014302	0.000134222	0.000148232	0.000144838	0.000144211	0.000126102	0.000125087	0.000104364	9.15953e-05	0.00013854	0.000114612
Neuron_567	0.00147897	0.000996966	0.000824045	0.000665713	0.000630318	0.000608892	0.000475868	0.000517328	0.000381289	0.000399308	0.000447524	0.000409564	0.000338435	0.000364554	0.000370126	0.000416841	0.000402846	0.000399907	0.000367912	0.000349863	0.000318909	0.000347965	0.000291668	0.00031614	0.00040084	0.000321773	0.000354388	0.000315044	0.000338117	0.000293953	0.000259492	0.000326534	0.000272595	0.000280748	0.000300687	0.000344698	0.000252765	0.000258402	0.000313038	0.000286379	0.000281106	0.000312249	0.000300919	0.000258519	0.000288746	0.000231216	0.000250436	0.000243065	0.000240571
Neuron_568	0.00139021	0.00128563	0.00114925	0.000744176	0.000610984	0.000533748	0.000491361	0.000452174	0.000372653	0.000392101	0.000372402	0.00035543	0.000311755	0.000378157	0.00035823	0.000295403	0.00030569	0.000297185	0.000308706	0.000305647	0.00030858	0.000334549	0.000258524	0.000248238	0.000291894	0.000246977	0.000285635	0.000248055	0.000256568	0.000254206	0.000242685	0.000261704	0.0002588	0.000206213	0.000186318	0.000237658	0.000234957	0.000207891	0.00026151	0.00021078	0.000262502	0.000221604	0.000241264	0.000241572	0.000236493	0.000170021	0.000180912	0.000180699	0.00016853
Neuron_569	0.000944692	0.00106332	0.000906639	0.000625587	0.000458753	0.000424443	0.000347893	0.000336886	0.000284868	0.000263243	0.000269067	0.000240535	0.000202986	0.000229933	0.000287561	0.000249436	0.000223999	0.000190624	0.000206951	0.000209151	0.000201522	0.000194905	0.000190146	0.000182031	0.000205391	0.00017505	0.000198185	0.000161393	0.000181653	0.000163627	0.00017569	0.000193812	0.000162274	0.000143979	0.000139092	0.000161393	0.000147602	0.0001297	0.000174608	0.000126116	0.000172923	0.000166594	0.000142735	0.000138299	0.000145426	0.000116021	0.000111932	0.000141969	0.000127468
Neuron_570	0.000816512	0.000700415	0.000608434	0.000430272	0.000354915	0.000323976	0.000291822	0.000260054	0.000213009	0.000224318	0.00019447	0.00017692	0.000166781	0.000189365	0.000174452	0.000182651	0.000162559	0.000149188	0.000150346	0.000158811	0.000156507	0.000156045	0.00013865	0.000141384	0.000166595	0.000150413	0.000155479	0.000110122	0.000133736	0.00013949	0.000126191	0.000153119	0.000123095	0.000101225	0.000113203	0.000126922	0.000110974	0.000109207	0.000118985	0.000102851	0.000128157	0.000132399	0.000128084	0.000109934	0.000109087	8.51416e-05	0.000100014	0.00010597	9.54124e-05
Neuron_571	0.000940698	0.000730523	0.000631619	0.000460023	0.000400939	0.000362506	0.00030666	0.000301948	0.000249434	0.000260571	0.000236491	0.000229016	0.000190399	0.000230592	0.000215577	0.000219551	0.000218879	0.000210851	0.000202665	0.000205206	0.000195483	0.000216043	0.000165419	0.00017761	0.000210929	0.000182982	0.0002006	0.000166353	0.000180883	0.000172423	0.000147249	0.000186808	0.000163515	0.000137469	0.000149525	0.000181598	0.000154838	0.000148911	0.000175039	0.000151688	0.000163455	0.000163052	0.000168826	0.000157375	0.000165001	0.000114448	0.000130218	0.000140441	0.00011723
Neuron_572	0.00132517	0.000877974	0.000841278	0.000631517	0.000539066	0.000510084	0.000417058	0.000424984	0.000323919	0.000324936	0.000335906	0.000316031	0.000275773	0.000314745	0.000311884	0.000312542	0.000301127	0.000291391	0.000277823	0.000276978	0.000260915	0.00027467	0.000242062	0.000244823	0.000288323	0.000256061	0.000257122	0.000238365	0.000255422	0.000233636	0.000202391	0.000253039	0.000208375	0.000196349	0.000220902	0.000251232	0.000197156	0.000199626	0.000240446	0.000200432	0.000218442	0.000212308	0.000220297	0.000201696	0.000222532	0.000169829	0.000182045	0.000186224	0.000173695
Neuron_573	0.000779556	0.000754436	0.000659056	0.000576365	0.000458053	0.000413315	0.000326357	0.000301524	0.000274635	0.000234035	0.00025903	0.000234787	0.000233132	0.000244788	0.000299956	0.0002405	0.000208885	0.000171464	0.000198827	0.000210925	0.000185673	0.000176888	0.00018652	0.000171919	0.000185501	0.000183456	0.00018339	0.000147228	0.000173325	0.000158809	0.000179739	0.000191877	0.000169325	0.000163372	0.000145457	0.000160015	0.000149482	0.000152756	0.000153185	0.00012761	0.000168625	0.000141798	0.000136992	0.000110849	0.000130465	0.000141063	0.000107388	0.000137459	0.000125633
Neuron_574	0.00157461	0.00133481	0.00116834	0.000827128	0.000671053	0.000603338	0.000493242	0.000493363	0.000382301	0.000391838	0.000397416	0.000374011	0.000340295	0.000401848	0.000377145	0.00035244	0.00034696	0.000334086	0.000328086	0.000329926	0.000337403	0.000340351	0.00027081	0.000279551	0.000332836	0.000300034	0.000289229	0.000260866	0.000295108	0.000269761	0.000252816	0.000290385	0.000245927	0.000218917	0.000219773	0.000294461	0.00023804	0.000244453	0.000307124	0.000228792	0.000273753	0.000238645	0.000250485	0.000254752	0.000273714	0.000185033	0.000209074	0.000217379	0.000200137
Neuron_575	0.00139893	0.00111557	0.00100565	0.000836109	0.000735753	0.000720382	0.000558208	0.000581864	0.000457024	0.0004276	0.000520506	0.000450346	0.000377205	0.000397296	0.000408921	0.000447286	0.000422293	0.000414752	0.000408655	0.000376833	0.000336647	0.000349685	0.000310157	0.000327547	0.000451778	0.000359312	0.000404164	0.000336426	0.000355178	0.000314565	0.000293834	0.000375163	0.000317662	0.000308543	0.000335408	0.000359025	0.000290465	0.000268855	0.000324763	0.000283054	0.000332398	0.000335625	0.000325891	0.000261917	0.000292122	0.000254287	0.000260167	0.000267246	0.000275071
Neuron_576	0.0008157	0.000762586	0.000736615	0.000573543	0.000500241	0.000446423	0.000384445	0.000370359	0.000325	0.00031521	0.000339225	0.00028743	0.00025924	0.000277024	0.000274373	0.000280124	0.000259792	0.000259634	0.000250473	0.000254079	0.000235275	0.000243566	0.000208628	0.000218988	0.000256391	0.000231873	0.000261856	0.000196411	0.000221258	0.000214022	0.000195953	0.000231708	0.000218812	0.000200724	0.000195085	0.000202571	0.000186576	0.000172912	0.000196861	0.000188449	0.000206297	0.000220516	0.000213352	0.00016577	0.000169255	0.000161381	0.000156989	0.000162095	0.00015583
Neuron_577	0.000634668	0.000611247	0.000558313	0.000449924	0.000374214	0.000333265	0.000300641	0.00027297	0.000250433	0.000226946	0.000248125	0.000234757	0.00021119	0.000234831	0.000259002	0.00021232	0.000206477	0.00017831	0.000200896	0.000199629	0.000181878	0.000184643	0.000175844	0.000164643	0.000187907	0.000163915	0.000180238	0.000149181	0.000167756	0.000154975	0.000177575	0.000166511	0.000158176	0.000153388	0.000142033	0.000157201	0.00014007	0.000145753	0.000154661	0.000118147	0.000168202	0.000143473	0.000138058	0.000124084	0.000133765	0.000132579	0.000107927	0.000131364	0.000122759
Neuron_578	0.00123254	0.00118405	0.0010345	0.000809731	0.000657426	0.000605555	0.000502513	0.000479178	0.000432513	0.000404105	0.000441846	0.000412589	0.000367268	0.000402876	0.000467554	0.000360488	0.000355836	0.000317814	0.000350436	0.000339178	0.00031082	0.000307526	0.0003077	0.000279562	0.000324766	0.000283828	0.000298735	0.000253505	0.000292678	0.00027149	0.000301896	0.000288283	0.00026009	0.000272189	0.000241247	0.000276781	0.000228808	0.000241964	0.000275034	0.000210712	0.000288547	0.000268247	0.000243105	0.000204468	0.000223546	0.000228232	0.00019392	0.000221562	0.000223357
Neuron_579	0.0017173	0.00167969	0.00157437	0.00110567	0.00102641	0.000887844	0.000778398	0.000757549	0.000634794	0.000659511	0.000672849	0.000617676	0.000545689	0.000627407	0.000670044	0.000562799	0.000588342	0.00054174	0.000541547	0.000528914	0.000526528	0.000575661	0.000452022	0.000464375	0.000511004	0.00045735	0.000501588	0.00045817	0.000497102	0.000448572	0.000422573	0.000506523	0.000479189	0.000416052	0.000386549	0.000454068	0.000435778	0.000397353	0.000459982	0.000411439	0.000462415	0.000425985	0.00043671	0.000399382	0.00042105	0.000343828	0.000345353	0.000326793	0.00032244
Neuron_580	0.00152907	0.0014824	0.00132993	0.00100884	0.000860765	0.000747757	0.000657669	0.000614916	0.00052247	0.000504468	0.000500838	0.000440291	0.000433444	0.000473963	0.00048538	0.000459865	0.000409252	0.000371009	0.000379893	0.000397672	0.00037747	0.000382098	0.000358898	0.000350769	0.000403084	0.000384158	0.000390978	0.000299604	0.000347482	0.000343266	0.00031951	0.000400997	0.000349526	0.000291715	0.00030076	0.000322025	0.000298522	0.000270991	0.000319013	0.000277052	0.000336725	0.000317604	0.00031704	0.000267911	0.000276119	0.000246752	0.000240319	0.000251078	0.000257295
Neuron_581	0.000972545	0.000958032	0.000838013	0.000627467	0.000517456	0.00045185	0.000400762	0.000365362	0.000307855	0.00031661	0.00029671	0.000262209	0.000251909	0.000270991	0.000300501	0.000281593	0.000231919	0.000195271	0.00021928	0.000243078	0.000225582	0.00022177	0.000199965	0.000188249	0.0002168	0.000181316	0.000210508	0.000157275	0.000177721	0.000173187	0.000211486	0.000199563	0.000179499	0.000169486	0.00013407	0.000181279	0.000164847	0.000180347	0.000168922	0.000136854	0.000180349	0.000164062	0.000157643	0.000150241	0.00014694	0.000141774	0.000127523	0.000163719	0.000138249
Neuron_582	0.00152789	0.00124564	0.00114503	0.00085587	0.000662035	0.000610114	0.000523954	0.000506855	0.000419412	0.00039283	0.000422284	0.000387528	0.000338387	0.000351049	0.000356948	0.000359167	0.000305097	0.000320852	0.000332581	0.000341898	0.000303402	0.000296837	0.000276207	0.000263789	0.000329593	0.000298908	0.000325622	0.000260403	0.00025782	0.000270072	0.000252642	0.000277142	0.000261743	0.000243512	0.000249932	0.000267933	0.000227837	0.000214258	0.000252548	0.000226116	0.000275195	0.000266433	0.000249798	0.000208044	0.000205408	0.000202599	0.000186644	0.000210188	0.000209317
Neuron_583	0.00163513	0.00131759	0.00116121	0.000863258	0.000725153	0.00067148	0.000536213	0.000547034	0.000422667	0.000423825	0.000457493	0.000403257	0.000355606	0.000409938	0.00037402	0.00041332	0.000401239	0.00040148	0.000361108	0.000360188	0.000342015	0.000362128	0.000307538	0.000322536	0.000413495	0.000351359	0.000367956	0.000308144	0.000340387	0.000305288	0.000257317	0.000337497	0.000281344	0.000260324	0.000289632	0.000347591	0.000255466	0.000259764	0.000330294	0.000278307	0.000294679	0.000304222	0.00031041	0.000272881	0.000304552	0.000214781	0.000253182	0.000251543	0.000236874
Neuron_584	0.000954218	0.000874983	0.000809142	0.000682944	0.000644067	0.000607229	0.000543139	0.000488101	0.000419932	0.000453836	0.000415261	0.000374858	0.000365804	0.000389049	0.000352	0.000390474	0.000368689	0.000343613	0.000329831	0.000339564	0.00032779	0.000321161	0.000282135	0.00028704	0.000365317	0.000328777	0.00034348	0.000241748	0.000313542	0.000284808	0.000267436	0.000329548	0.000285461	0.000266952	0.000272266	0.000282942	0.000252459	0.000245958	0.000250249	0.000245273	0.000281832	0.000326424	0.000300873	0.000224653	0.000233573	0.000224032	0.000237302	0.000223076	0.000219765
Neuron_585	0.00115226	0.00117868	0.000999018	0.000733719	0.000644411	0.000570919	0.000497031	0.000453531	0.000387077	0.000402999	0.000365823	0.000321564	0.000299716	0.000328973	0.000357046	0.000360504	0.000304844	0.000265786	0.000276389	0.000305038	0.000297141	0.00029064	0.000247796	0.000254286	0.000293621	0.000249767	0.000278535	0.000214043	0.00024083	0.000229645	0.000237943	0.000277172	0.00023717	0.00022077	0.000202352	0.00023021	0.000221767	0.000221026	0.000216664	0.000204381	0.000224867	0.000236944	0.000213351	0.000197178	0.000193453	0.00017869	0.000173447	0.00019973	0.000174158
Neuron_586	0.00116147	0.00118488	0.000926309	0.000652588	0.000510622	0.000494554	0.000390277	0.000407308	0.000334677	0.000326501	0.000354607	0.000312367	0.00027047	0.000284464	0.000330227	0.00031799	0.000266886	0.000267112	0.000269758	0.000276366	0.000250108	0.000239635	0.000226456	0.0002277	0.000275284	0.000221227	0.000256765	0.000223341	0.000218481	0.00021096	0.000217777	0.000244928	0.000209876	0.000204536	0.000204521	0.000215443	0.000186736	0.000172723	0.000208392	0.000187017	0.000228618	0.000225355	0.000198603	0.000167413	0.000171621	0.000165345	0.000154612	0.000166851	0.000182032
Neuron_587	0.00133622	0.00113211	0.000956287	0.000719414	0.000612727	0.000545031	0.000465525	0.000459361	0.000381154	0.000373108	0.00039005	0.000348106	0.000332562	0.000326498	0.000333861	0.000333994	0.000298708	0.00028829	0.000296854	0.000341129	0.000283145	0.00029948	0.000271945	0.000262144	0.00027246	0.000266453	0.000311104	0.000231368	0.000258059	0.000255612	0.000248795	0.000256731	0.00027355	0.00025573	0.000232829	0.000248091	0.000217051	0.000205327	0.00022234	0.00023784	0.000249586	0.000246939	0.000256238	0.000199172	0.000188765	0.000212827	0.00017953	0.000191606	0.000180869
Neuron_588	0.001156	0.00105013	0.000931507	0.000707845	0.000561156	0.000494481	0.000422596	0.000400295	0.000341477	0.00033689	0.000320886	0.000281771	0.000261877	0.000274337	0.000305868	0.000298244	0.000245041	0.000230681	0.000238908	0.000270991	0.000247462	0.000239135	0.000222252	0.000216187	0.000238389	0.000220661	0.000258589	0.000183619	0.000199637	0.000208844	0.000200426	0.000232594	0.000212417	0.000188041	0.000170578	0.000204546	0.000185561	0.000175563	0.000184711	0.000179498	0.000201049	0.000192066	0.000193226	0.000164682	0.000160414	0.000155382	0.000135694	0.000173259	0.000143676
Neuron_589	0.000721749	0.000668524	0.000581488	0.000394305	0.000313685	0.000244981	0.000207654	0.000193309	0.000159802	0.000151776	0.000139846	0.000129561	0.00011146	0.000117153	0.000129513	0.000139395	9.30725e-05	9.95642e-05	0.000106351	0.000109759	0.000120184	0.000121277	8.71301e-05	9.70301e-05	0.000105871	8.85043e-05	0.000116509	7.66772e-05	7.10766e-05	9.53464e-05	9.19115e-05	0.000105937	8.56675e-05	6.60293e-05	7.18544e-05	8.38033e-05	7.68992e-05	7.45517e-05	7.80742e-05	6.9302e-05	7.71508e-05	6.71576e-05	6.73737e-05	8.01448e-05	7.64775e-05	5.26995e-05	5.22407e-05	7.78394e-05	5.91016e-05
Neuron_590	0.00108116	0.00106439	0.00091242	0.000699718	0.000660834	0.000569779	0.00048314	0.000464727	0.000409476	0.000399442	0.000412212	0.000368095	0.00033702	0.000367419	0.000398286	0.00037468	0.000352154	0.000321624	0.000323638	0.00032399	0.000306833	0.00034363	0.00028774	0.000288497	0.000330886	0.000296527	0.000323585	0.000255591	0.000294474	0.000275279	0.000261708	0.000330484	0.000303987	0.000262595	0.000257959	0.000279331	0.000260148	0.000239322	0.000253716	0.000254549	0.000270295	0.00027263	0.000271448	0.000229093	0.000235281	0.000219872	0.000208467	0.000222487	0.000211651
Neuron_591	0.00120846	0.00114936	0.00109266	0.000715978	0.00055987	0.000501931	0.000450205	0.000406771	0.000344354	0.000368473	0.00035885	0.000338257	0.000284101	0.000365123	0.000403076	0.000296346	0.000299959	0.000259731	0.000291678	0.00028795	0.000292382	0.000304258	0.00025152	0.000244702	0.000262887	0.000214857	0.000238802	0.000236498	0.000241027	0.000217439	0.000253777	0.000243935	0.000215122	0.000198656	0.000158449	0.000206596	0.000208074	0.000198925	0.000242838	0.000172011	0.000251581	0.000197178	0.000199484	0.00021825	0.000212035	0.000159506	0.000159044	0.000175698	0.000158423
Neuron_592	0.000785287	0.000749069	0.00063925	0.000467577	0.000391355	0.000328076	0.000287367	0.000268107	0.000230432	0.000214723	0.000218865	0.000201274	0.000193851	0.000206424	0.000228701	0.000193597	0.000170131	0.000150097	0.000170902	0.000178096	0.000163336	0.00017789	0.000161298	0.000152178	0.000164719	0.000150423	0.000167364	0.000128597	0.000137977	0.000150768	0.000152464	0.000157906	0.000152055	0.000128029	0.000128322	0.000130462	0.00013028	0.000116132	0.00012815	0.000114765	0.000146607	0.000117855	0.000128401	0.000115714	0.000113989	0.000108457	9.25705e-05	0.000110024	0.000103231
Neuron_593	0.000860567	0.000737044	0.000646192	0.000469982	0.000375842	0.000320589	0.000286799	0.000245115	0.000229639	0.000212552	0.00021543	0.000197918	0.00016893	0.000198112	0.000201884	0.000185469	0.000153932	0.000147709	0.000171757	0.000173034	0.000170016	0.000177835	0.000142038	0.000136528	0.000168766	0.000133508	0.000167206	0.000116069	0.000119184	0.000136416	0.000156902	0.000147446	0.000135686	0.000118771	0.000107008	0.000131161	0.000121538	0.000126062	0.000129199	9.84982e-05	0.000137034	0.000115026	0.000119362	0.000120514	0.000113974	9.94614e-05	8.59139e-05	0.000124777	9.88142e-05
Neuron_594	0.00113404	0.00115028	0.000952015	0.000764783	0.000666463	0.000618573	0.000514716	0.000485273	0.000415441	0.0004304	0.000406771	0.000364822	0.000335009	0.000368021	0.000414546	0.000393717	0.000357903	0.000297033	0.000309926	0.000325132	0.000315048	0.000306382	0.000282291	0.000289098	0.000325409	0.000279756	0.000295949	0.000238218	0.000281795	0.000253784	0.000275569	0.000308073	0.000248689	0.000254841	0.000232929	0.000260394	0.000230321	0.000243135	0.00024119	0.000220287	0.000256652	0.000272131	0.000240613	0.000208372	0.000210598	0.00020684	0.000198949	0.000216975	0.000202069
Neuron_595	0.0011834	0.00103068	0.00098063	0.000735432	0.000719509	0.000627571	0.000544208	0.000534649	0.000451889	0.000450761	0.000480802	0.000426583	0.000401479	0.000444874	0.00048238	0.000417001	0.000402631	0.000354691	0.000372799	0.000406083	0.000353349	0.000375469	0.000352272	0.000343427	0.000354861	0.000349568	0.000372139	0.000299507	0.000344046	0.000332762	0.000308354	0.000363726	0.000352257	0.000317763	0.000306118	0.000318512	0.000294575	0.000267119	0.000303021	0.000295495	0.000320247	0.00030727	0.000312284	0.000252414	0.000259653	0.000268281	0.000226778	0.00023949	0.000239908
Neuron_596	0.000611862	0.000551256	0.000506138	0.000405198	0.000343294	0.000300881	0.000237997	0.000237976	0.000215092	0.000181933	0.000220961	0.000188711	0.000179154	0.000182124	0.000235002	0.000177913	0.000166399	0.00014537	0.000159334	0.000172409	0.00013868	0.000152022	0.000154188	0.000145542	0.000142645	0.000141334	0.000156814	0.00013096	0.0001369	0.000133721	0.000135297	0.000148103	0.000153462	0.000144979	0.00013306	0.000122489	0.000127797	0.00010427	0.000116601	0.000120999	0.000133248	0.000114075	0.00012006	9.19559e-05	9.45224e-05	0.000120026	8.20476e-05	9.83728e-05	9.91277e-05
Neuron_597	0.000821716	0.000824786	0.000786464	0.000518682	0.000438916	0.000376044	0.000358508	0.000315206	0.00026755	0.00028211	0.000254807	0.000246259	0.00022113	0.000255271	0.000241306	0.00022767	0.000222174	0.000207324	0.000215689	0.000214201	0.000227128	0.000240143	0.000182608	0.000187496	0.00021858	0.000187875	0.000216305	0.000162035	0.000183644	0.000187521	0.000178095	0.000202854	0.000181337	0.000147696	0.000139434	0.000172496	0.000166863	0.000155375	0.000180022	0.00015004	0.000184286	0.000166003	0.000171933	0.000175246	0.000167452	0.000123552	0.000130844	0.000143678	0.000125137
Neuron_598	0.00115156	0.00111304	0.00094898	0.000799776	0.000705765	0.000656277	0.000567812	0.000523143	0.000456007	0.000476371	0.000430179	0.000394137	0.000381903	0.000399172	0.000372556	0.000410855	0.000377297	0.000360486	0.000341356	0.00035963	0.00034266	0.000346007	0.000300359	0.000308747	0.000360247	0.000349955	0.000355094	0.000257691	0.000321231	0.00031952	0.000284848	0.000352307	0.000301643	0.000279474	0.000289372	0.000303452	0.000261406	0.000254841	0.000261271	0.000266599	0.000300328	0.000348666	0.000314343	0.00023371	0.000235989	0.000231899	0.000244637	0.000234922	0.000224352
Neuron_599	0.00128294	0.00124498	0.000966472	0.000743742	0.000650213	0.000602608	0.000457567	0.000467034	0.000385619	0.000369319	0.000409683	0.000345813	0.00029712	0.000320621	0.000355143	0.00037453	0.000324658	0.000314071	0.0003086	0.00030443	0.000279528	0.000298914	0.000254851	0.000271348	0.000347032	0.000265834	0.000316017	0.000254243	0.000263792	0.000254828	0.000240978	0.000312054	0.00026533	0.000240889	0.000245559	0.000273861	0.000236759	0.000217981	0.000248242	0.00023301	0.000256671	0.000255283	0.000245712	0.000209993	0.000226045	0.000194761	0.000194752	0.000209545	0.000213472
Neuron_600	0.000915777	0.000860888	0.000788015	0.000657329	0.000546404	0.000517872	0.000406058	0.000419323	0.000344406	0.000340054	0.000387166	0.000342756	0.000304014	0.00032191	0.000337963	0.000340741	0.000327466	0.000300246	0.000302284	0.000291607	0.000268087	0.000258832	0.000250105	0.000250912	0.000318888	0.000268802	0.000288388	0.000235423	0.000277864	0.000235922	0.000248566	0.000277384	0.000226793	0.000230773	0.000230639	0.000274797	0.000200523	0.000218795	0.000252337	0.000203418	0.000255139	0.000254253	0.000236164	0.000192797	0.000219274	0.000195141	0.000195511	0.000205031	0.000206349
Neuron_601	0.00154909	0.00152178	0.00139113	0.000966211	0.000810976	0.000695023	0.000607202	0.000560115	0.000468665	0.000456044	0.000463569	0.00042127	0.000376022	0.000430804	0.000463322	0.000397042	0.000382336	0.000350632	0.000361483	0.000365794	0.000366405	0.000390439	0.000311256	0.00030586	0.000342551	0.00029375	0.000352077	0.000292429	0.000310785	0.000296073	0.000298276	0.000324009	0.000326538	0.000261424	0.000229499	0.000306305	0.000298789	0.000266968	0.000317878	0.000254149	0.000307653	0.000246889	0.000269873	0.000279029	0.000287772	0.000216863	0.000212171	0.000239597	0.000212013
Neuron_602	0.00154018	0.0013378	0.00119774	0.000873396	0.000693852	0.000635293	0.000503174	0.000508269	0.000409058	0.00041158	0.000426641	0.00039325	0.000329997	0.00038634	0.000422749	0.000355549	0.000348974	0.000331633	0.000338708	0.000327523	0.000328394	0.000317046	0.000286355	0.000289851	0.000331607	0.000287262	0.000319711	0.00028516	0.000285251	0.000292765	0.000256676	0.000309176	0.000258829	0.000242582	0.000244982	0.000282164	0.000244489	0.00021815	0.000299981	0.000225357	0.000288325	0.000263375	0.00023862	0.000225847	0.000246321	0.000191683	0.000192795	0.000196535	0.000221402
Neuron_603	0.00132667	0.00127668	0.00113436	0.000818595	0.000645271	0.000577547	0.000502411	0.000463874	0.000375591	0.000360546	0.000351107	0.000319917	0.000292303	0.000354454	0.000372999	0.000302285	0.000300338	0.000251381	0.000272342	0.000276047	0.000281086	0.000290826	0.000245442	0.000228849	0.000269307	0.000233625	0.000250716	0.000208004	0.00024	0.000207297	0.000232669	0.000233982	0.000208124	0.000178161	0.000154794	0.000213034	0.000196159	0.000186101	0.000247587	0.000150857	0.000234763	0.000188801	0.000191828	0.000212695	0.000210245	0.000146884	0.000156116	0.000178836	0.000162191
Neuron_604	0.00159787	0.00133269	0.00121722	0.000990062	0.000888209	0.000804549	0.000727924	0.000655626	0.00053849	0.000597934	0.000580109	0.000523906	0.000503677	0.000541214	0.000517837	0.000508767	0.000490837	0.000426014	0.000454302	0.000468265	0.000451828	0.000413009	0.00038363	0.000384057	0.000438103	0.000418388	0.000422326	0.000334408	0.000398632	0.00036661	0.000397461	0.000395319	0.000362433	0.000352161	0.000315943	0.000379013	0.000331975	0.000358501	0.000357365	0.0003028	0.000385274	0.000382689	0.000352409	0.000298371	0.00031056	0.000297574	0.000289488	0.000293779	0.000285674
Neuron_605	0.00122797	0.00111594	0.000909664	0.00064925	0.000520034	0.000461575	0.000407871	0.000372289	0.000278039	0.000290108	0.00026961	0.000235787	0.000226575	0.000241735	0.000233023	0.00026298	0.000187424	0.000185311	0.000199364	0.000218475	0.0002011	0.000196219	0.000175672	0.000160161	0.000223191	0.000177789	0.000192889	0.000152543	0.000145414	0.000160599	0.000165384	0.000186216	0.000158532	0.000140631	0.000137184	0.000156143	0.00014702	0.000150945	0.000149508	0.000124798	0.000160048	0.000137982	0.000135545	0.000134164	0.00013486	0.000116441	0.00011323	0.000132884	0.000132667
Neuron_606	0.00113606	0.00105582	0.000964091	0.000760087	0.000643125	0.000585045	0.000516365	0.000468457	0.000397223	0.000388034	0.000389741	0.000349207	0.000321324	0.000344679	0.000328179	0.000351789	0.000322855	0.000300717	0.000309252	0.000307997	0.000280171	0.000292511	0.000261688	0.000257535	0.000352608	0.000300683	0.000319424	0.000235763	0.000269831	0.000253346	0.000241048	0.000297508	0.000261593	0.000229342	0.000256181	0.000255899	0.000232862	0.000209458	0.000242089	0.000201519	0.000268314	0.000269035	0.000262135	0.000207439	0.000215062	0.000191015	0.000195636	0.000207419	0.000202746
Neuron_607	0.00143031	0.00131607	0.00112997	0.000816374	0.000663805	0.000610905	0.000515504	0.000505167	0.000444229	0.00043883	0.000444689	0.000403524	0.000326062	0.000385277	0.000393485	0.000384348	0.000363171	0.000357287	0.000357813	0.000355792	0.000319163	0.000344774	0.000297544	0.00030429	0.000373932	0.000299385	0.000349308	0.000279364	0.000295311	0.000281679	0.000265	0.000302319	0.00027325	0.000255961	0.000253041	0.000287135	0.000251927	0.000239393	0.000282492	0.000255252	0.000280937	0.000295566	0.000281913	0.000241343	0.000259143	0.000206282	0.00021506	0.000242031	0.000210281
Neuron_608	0.00136421	0.00124999	0.0010191	0.00070629	0.000584285	0.000494288	0.000425739	0.000425624	0.000325763	0.000329792	0.000317139	0.000303142	0.000299718	0.000320641	0.000310175	0.000296093	0.000278039	0.00024652	0.00025731	0.000271181	0.000278862	0.000267037	0.000227813	0.000224554	0.000234737	0.000246211	0.000234997	0.000190288	0.00023545	0.000227992	0.00021963	0.000242119	0.000208737	0.000172379	0.000167018	0.00022573	0.00018913	0.000187101	0.000235022	0.000177194	0.000221984	0.000189948	0.00018903	0.000195368	0.000203694	0.000150396	0.00016258	0.00016521	0.000157394
Neuron_609	0.00110531	0.00100252	0.000932839	0.000727243	0.000616937	0.000553102	0.000465348	0.000429215	0.000368616	0.000345368	0.000389205	0.000331511	0.000291276	0.000312146	0.000336358	0.000343085	0.000293749	0.000286263	0.000295105	0.00029179	0.0002697	0.000277262	0.000229872	0.000244898	0.000318954	0.000256605	0.000300539	0.000238481	0.000240141	0.000227057	0.000235283	0.000277676	0.000245976	0.0002265	0.00023223	0.000237253	0.00022673	0.000209207	0.000223562	0.000194149	0.000239614	0.000224525	0.000224554	0.00018811	0.000205068	0.000185866	0.000171902	0.000199122	0.000185301
Neuron_610	0.00160226	0.00125388	0.000989246	0.000805466	0.000735816	0.000690303	0.000452484	0.000515937	0.000397902	0.000389264	0.000456145	0.000406515	0.000347922	0.000374837	0.000404468	0.000421909	0.000408054	0.000378515	0.000359796	0.000333365	0.000320125	0.000350121	0.000285267	0.000324809	0.000370262	0.000316607	0.000333601	0.000298039	0.000342849	0.000303078	0.000266322	0.000366127	0.000289788	0.000274824	0.000287155	0.000343101	0.000259296	0.000260079	0.000310134	0.000284	0.000280961	0.000298764	0.000282416	0.000246987	0.000284998	0.00022126	0.000245526	0.000233518	0.000243233
Neuron_611	0.00100579	0.000896347	0.000826939	0.000674625	0.000528473	0.000456635	0.000363669	0.000349622	0.000328337	0.000281687	0.000334652	0.000283631	0.000266324	0.000279368	0.000335958	0.000283685	0.000248951	0.000222604	0.000242357	0.000255356	0.000222525	0.000221606	0.000217332	0.000208009	0.000222074	0.000209753	0.00023427	0.000186279	0.000202573	0.000200933	0.00022222	0.000225567	0.000198714	0.000204118	0.000185978	0.000188952	0.000174424	0.000182377	0.000182644	0.000155288	0.000205667	0.000186055	0.000166887	0.000136329	0.000156599	0.000172788	0.000130826	0.000158377	0.000147189
Neuron_612	0.00112349	0.00120892	0.00102803	0.000718382	0.000579793	0.000515255	0.000431298	0.000413963	0.00035554	0.00035975	0.000359214	0.000327257	0.000273284	0.000313163	0.00035731	0.000306327	0.000277601	0.000258867	0.000279328	0.000274862	0.000267337	0.000270975	0.000230126	0.000241192	0.000269242	0.000231364	0.000256611	0.000214272	0.000220797	0.000221852	0.000225391	0.000243916	0.000204839	0.0001879	0.00018461	0.000203867	0.000194239	0.000183088	0.000208881	0.000186087	0.000221652	0.000216584	0.00019744	0.000184993	0.000187896	0.000148267	0.000153816	0.000183996	0.000158001
Neuron_613	0.0020298	0.00180984	0.00175658	0.0012957	0.00112813	0.00103156	0.000890227	0.000843048	0.000714649	0.000748855	0.00074184	0.000668162	0.00060204	0.000674407	0.000669187	0.000632888	0.000615164	0.000603904	0.000588216	0.000607038	0.000587095	0.000579565	0.000499625	0.000520403	0.000586138	0.000554515	0.000601337	0.000464991	0.000529566	0.000523228	0.000452683	0.000560255	0.000504902	0.000455222	0.000453587	0.000499919	0.000447776	0.000401903	0.000491091	0.000430483	0.000503422	0.000521969	0.000486795	0.000408236	0.000411637	0.000365757	0.000363055	0.000368959	0.000368372
Neuron_614	0.00111611	0.00105168	0.000940409	0.000739974	0.000587759	0.000581971	0.000467726	0.000478504	0.000400572	0.000361744	0.000439853	0.000385859	0.000310409	0.000338902	0.000361613	0.000376576	0.000342514	0.000341929	0.000345702	0.000316849	0.000284354	0.000291351	0.000270629	0.000273163	0.000390521	0.000296179	0.000347083	0.000282651	0.000290767	0.000258008	0.000265784	0.000310706	0.000259659	0.000248829	0.000271258	0.000289836	0.000234946	0.000217213	0.000280071	0.000219127	0.000288633	0.000285178	0.000266521	0.000215862	0.000240054	0.000208067	0.000201189	0.000231526	0.000240635
Neuron_615	0.000858156	0.000868475	0.000846821	0.000536572	0.000384666	0.000336164	0.000312172	0.000300736	0.000224791	0.000218249	0.000245063	0.000210308	0.000178392	0.000181144	0.000188094	0.000206306	0.00016612	0.000181251	0.000180131	0.000177057	0.000166575	0.000166053	0.000145306	0.000134582	0.000191345	0.000149366	0.000185574	0.000149699	0.000139003	0.000142105	0.000124277	0.000144918	0.000137729	0.000112612	0.000125434	0.000140497	0.000127008	0.000115174	0.000141319	0.000114356	0.000134809	0.000124866	0.000118273	0.000119355	0.000130551	9.5271e-05	9.584e-05	0.000117194	0.000110415
Neuron_616	0.00131703	0.0012553	0.00109969	0.00074732	0.000578482	0.000504641	0.000409379	0.000402163	0.000344313	0.000309262	0.000357442	0.000294308	0.000261354	0.000285819	0.000315635	0.00029897	0.000253687	0.000254142	0.000257316	0.00026358	0.000232484	0.000249796	0.000206273	0.000209032	0.00025728	0.000220034	0.000258198	0.000213034	0.000204918	0.000205229	0.000194785	0.000220406	0.00020486	0.000189207	0.000185363	0.000205567	0.000191061	0.000187804	0.000207526	0.000176314	0.000194291	0.000180233	0.000183843	0.000159805	0.000188767	0.000151656	0.000147614	0.000168388	0.000140021
Neuron_617	0.00132374	0.00112034	0.00107707	0.000748763	0.000559689	0.000486269	0.000427837	0.000415893	0.000338062	0.000329953	0.000339354	0.000307418	0.000253753	0.000300772	0.000298366	0.000273815	0.000263213	0.000258003	0.000265253	0.000257627	0.000253549	0.000275625	0.000216195	0.000213269	0.000269614	0.000213227	0.000270654	0.000212598	0.000218449	0.000221389	0.000207699	0.000226424	0.000211644	0.000172377	0.000170769	0.000213225	0.00019976	0.000179453	0.000235392	0.000168922	0.000212736	0.000178301	0.000188447	0.000201205	0.000206147	0.00014195	0.000146007	0.000174712	0.000162397
Neuron_618	0.000795683	0.000693221	0.0006219	0.000439552	0.000388628	0.000330426	0.000290394	0.000267572	0.000203945	0.00021421	0.000204312	0.0001985	0.000185997	0.000218799	0.000200386	0.00018427	0.000181808	0.000162349	0.000173201	0.000166845	0.000183639	0.0001904	0.000140476	0.000144915	0.00017648	0.000152034	0.00015992	0.000129816	0.000150855	0.000145519	0.000141179	0.000157695	0.000142808	0.000109508	0.000104282	0.000147219	0.00013419	0.000130454	0.000160333	0.000110739	0.000150156	0.000115512	0.00013141	0.000142907	0.000147812	9.27768e-05	0.000108802	0.000114869	0.000105345
Neuron_619	0.00124398	0.0013108	0.00111364	0.000953881	0.000774113	0.000743521	0.000609367	0.000583127	0.000511701	0.000512002	0.000525674	0.000469963	0.000439676	0.000468893	0.000527739	0.000462193	0.00044234	0.000378238	0.000400964	0.000397881	0.000363856	0.000338778	0.00035652	0.000352478	0.000402402	0.000366838	0.000363637	0.000293904	0.000359828	0.000306962	0.000358861	0.000362339	0.000294585	0.00031532	0.000289589	0.000330047	0.000263145	0.000296731	0.000300103	0.000254566	0.00034106	0.000347937	0.000304027	0.000235571	0.000252332	0.000263297	0.000252408	0.000275373	0.000263822
Neuron_620	0.00105194	0.000977693	0.000955863	0.000643373	0.000517923	0.000447191	0.00035866	0.000359657	0.000283406	0.00027673	0.000309178	0.000282205	0.000248969	0.000288488	0.000333492	0.000252883	0.000266952	0.000228181	0.000240307	0.000221814	0.000243145	0.000239644	0.000196235	0.000208698	0.000197622	0.000199434	0.000204429	0.000206815	0.000226468	0.000203624	0.000205192	0.000227338	0.000183517	0.000166067	0.000145846	0.000209733	0.000182686	0.000183608	0.000227468	0.00015147	0.000212994	0.000162111	0.000160759	0.000175879	0.000201386	0.00013747	0.000147809	0.000149503	0.000142273
Neuron_621	0.00104779	0.0010853	0.000939611	0.00070404	0.000531158	0.000497808	0.000415624	0.000414475	0.000355771	0.000305959	0.000372203	0.00031936	0.000275609	0.000284953	0.000338677	0.000318487	0.000264107	0.00026938	0.000278972	0.000278053	0.000234116	0.000233072	0.00023783	0.000222415	0.000291184	0.000242619	0.000277723	0.000227167	0.000221686	0.000207008	0.00020986	0.000232867	0.000217091	0.000201273	0.000209587	0.00021629	0.000190775	0.000178865	0.000207519	0.000179361	0.000221826	0.00020704	0.000194187	0.000157637	0.000179523	0.000169703	0.000146031	0.00019067	0.000180359
Neuron_622	0.00123072	0.0008598	0.000811282	0.000635388	0.000517994	0.000448285	0.000352643	0.000368256	0.000302161	0.000295596	0.000311084	0.000275875	0.000252952	0.000253937	0.000264876	0.000274995	0.00023954	0.000245606	0.000235388	0.000261627	0.000228509	0.000210913	0.000211484	0.000217952	0.000218407	0.00023215	0.000253956	0.000193597	0.000208382	0.000212703	0.000173242	0.000217172	0.000202286	0.000183856	0.000193531	0.000209515	0.000164371	0.000159297	0.000181962	0.000192407	0.000188434	0.000200724	0.000199802	0.000146879	0.000150603	0.000153203	0.000137751	0.000147946	0.000136389
Neuron_623	0.000837798	0.000650653	0.000624508	0.000513233	0.000429629	0.000394699	0.00034655	0.000324992	0.0002558	0.000258377	0.000258411	0.000245693	0.000219542	0.000238153	0.000226125	0.00024452	0.000230498	0.0002209	0.000213802	0.000208452	0.00019108	0.000199729	0.000184332	0.000181319	0.000243156	0.000205103	0.000211547	0.000171622	0.000194374	0.000171218	0.000159868	0.000191084	0.0001588	0.000153755	0.000171253	0.00018499	0.000146172	0.000148395	0.00017746	0.000144982	0.000174888	0.00017662	0.000173186	0.000145814	0.000161238	0.000132031	0.000139756	0.000144945	0.000141871
Neuron_624	0.000859251	0.00102309	0.000842307	0.000629514	0.000483858	0.000466626	0.000370164	0.000393173	0.000333709	0.000274863	0.000325052	0.000290573	0.000233532	0.000246949	0.000285033	0.000294685	0.000257598	0.000254756	0.000254635	0.000240597	0.00021054	0.000213227	0.000209515	0.000207844	0.000285578	0.000241647	0.000261051	0.000217244	0.000219161	0.000203291	0.000181369	0.000239089	0.000191169	0.000169992	0.000217982	0.000213523	0.000178877	0.000140923	0.000214438	0.000163604	0.000211451	0.000218835	0.000193874	0.000152523	0.00017108	0.000138454	0.000138908	0.000168798	0.000171924
Neuron_625	0.000921131	0.000819322	0.000835699	0.000562947	0.000455787	0.000387344	0.000349405	0.000330236	0.000267539	0.00025464	0.000284164	0.000251986	0.000230756	0.000253562	0.000287214	0.000227925	0.000227515	0.000194959	0.00021733	0.000213799	0.000201237	0.000212952	0.000197367	0.000183182	0.000195158	0.000190064	0.000195337	0.000174358	0.000188389	0.000191004	0.000179263	0.000200542	0.000175148	0.000155576	0.000158224	0.000171621	0.00016664	0.000152001	0.000177504	0.00013521	0.000184612	0.00014972	0.000146883	0.000147832	0.000159736	0.000135411	0.000120315	0.000131578	0.000132681
Neuron_626	0.00110938	0.000951745	0.000827858	0.000612935	0.00047456	0.000420513	0.000344677	0.000341556	0.000278212	0.000244661	0.000260607	0.000237146	0.000194139	0.000196154	0.000216815	0.000243997	0.000175788	0.000199822	0.000201154	0.000199362	0.000184993	0.000182815	0.000160341	0.000158078	0.000214078	0.000170322	0.000198991	0.000167267	0.000141732	0.000155198	0.000136194	0.000166476	0.00015397	0.000136311	0.000153471	0.000159804	0.000142139	0.000123329	0.000150407	0.000132497	0.000149284	0.000142356	0.000139651	0.000124358	0.000125317	0.000109865	0.000100302	0.00013348	0.000115807
Neuron_627	0.000937058	0.000701565	0.000678943	0.000544649	0.000449328	0.000371583	0.00033044	0.000312323	0.000261113	0.000259763	0.000265743	0.000249554	0.000214992	0.000235096	0.000225544	0.000224958	0.000215183	0.00020179	0.000215439	0.000208818	0.00019599	0.000199351	0.000176363	0.000176623	0.000218488	0.000181522	0.000207829	0.000160114	0.000167736	0.000172574	0.000170715	0.000175739	0.000165437	0.000147233	0.000146503	0.000183215	0.000146736	0.000151162	0.000170039	0.000138516	0.000167002	0.000158878	0.000162299	0.000145516	0.000150258	0.000125573	0.000121336	0.000147312	0.00012956
Neuron_628	0.00136807	0.00139841	0.0012462	0.00109094	0.000867707	0.000842313	0.000720079	0.000693951	0.000606147	0.000557589	0.000635335	0.000570156	0.000505696	0.000544466	0.000599098	0.000548965	0.000521095	0.000482519	0.000497222	0.000477338	0.000426374	0.000411307	0.000430793	0.000407531	0.000523663	0.000445285	0.000474831	0.000391916	0.000436238	0.000369976	0.000405191	0.000418399	0.000375234	0.000375448	0.000381586	0.000399689	0.000329922	0.000338332	0.000378308	0.000306072	0.000413097	0.000403447	0.000372315	0.000287969	0.000322872	0.000322197	0.000294343	0.000341973	0.000342314
Neuron_629	0.00163674	0.00151376	0.00137104	0.00101764	0.000794373	0.00071211	0.000646288	0.000572818	0.000484994	0.000439693	0.000469382	0.000407223	0.000388469	0.000412522	0.000402511	0.000421764	0.000366274	0.000335549	0.000356392	0.000357382	0.000326152	0.000329134	0.000313879	0.000288011	0.00040535	0.000350106	0.000363996	0.000265943	0.000305371	0.000292801	0.000290057	0.00034197	0.000290871	0.000249705	0.000281132	0.000284444	0.000271509	0.00024435	0.000280733	0.000204054	0.000307253	0.000280342	0.00027641	0.000230468	0.000254031	0.000216192	0.000207308	0.000244239	0.000231676
Neuron_630	0.00174247	0.00143711	0.00108288	0.000839746	0.000727288	0.000637035	0.000490907	0.000543519	0.00042835	0.000388258	0.000456115	0.000412771	0.00036942	0.000383446	0.00042861	0.000428329	0.000388985	0.00035694	0.00036202	0.000371431	0.000319181	0.000354866	0.000327069	0.000322047	0.000352788	0.000308209	0.00034184	0.000300227	0.000322749	0.000302045	0.000281738	0.000331633	0.000308343	0.000278357	0.000300351	0.000331215	0.000258428	0.000252271	0.000298234	0.000280393	0.000281476	0.000268036	0.000276681	0.000242464	0.000267585	0.000241126	0.000219434	0.000241726	0.000238751
Neuron_631	0.00127409	0.00108774	0.00102466	0.000863996	0.000782043	0.000744676	0.000633916	0.000618249	0.000512633	0.000516897	0.000566654	0.000491875	0.000421328	0.000435606	0.000421996	0.000504805	0.000471248	0.000466129	0.000438361	0.000435251	0.000373157	0.000396245	0.000334408	0.000361238	0.000491177	0.00041108	0.000466393	0.000364279	0.000405379	0.000349379	0.000307311	0.000403261	0.000357088	0.000345674	0.000379136	0.000378524	0.000325415	0.000303308	0.000339527	0.00033146	0.000354938	0.000401952	0.000381684	0.000283689	0.000319226	0.000284506	0.000297654	0.000292258	0.000280019
Neuron_632	0.00169438	0.0014248	0.0012172	0.000886741	0.000762028	0.000646393	0.000569134	0.000535618	0.000447814	0.000447821	0.00043289	0.000378654	0.000345808	0.000379694	0.000391695	0.00036082	0.000323072	0.000307342	0.000325691	0.000352575	0.0003199	0.000360283	0.000297489	0.00028146	0.000323521	0.000261743	0.000332821	0.000256103	0.000257	0.00028616	0.000280509	0.000288223	0.000302303	0.000258653	0.00023943	0.000254219	0.000260605	0.000237988	0.000243413	0.000240189	0.000270969	0.000234628	0.000256886	0.000234796	0.000228503	0.000213947	0.000185879	0.000218588	0.000197146
Neuron_633	0.00153294	0.00142968	0.00124693	0.00106609	0.00098335	0.000900768	0.000703249	0.000684841	0.000605846	0.00056665	0.000643781	0.000564405	0.000539988	0.000579255	0.000659036	0.000573608	0.000555995	0.000482056	0.000505099	0.000478865	0.000462557	0.000491946	0.000427961	0.000433143	0.000473484	0.000456528	0.000442147	0.00040626	0.000463726	0.000412362	0.000415655	0.000504444	0.000446022	0.000405785	0.000390975	0.00043664	0.000402827	0.000396282	0.000407563	0.000355687	0.000421533	0.000381091	0.000378847	0.00032488	0.000374343	0.000348538	0.000322064	0.000332548	0.000327211
Neuron_634	0.00167808	0.00169506	0.00145038	0.00111387	0.000925372	0.000835508	0.000747574	0.000700329	0.000597013	0.000559525	0.000572942	0.000495892	0.000467389	0.00048568	0.000489773	0.000521982	0.000467082	0.000430545	0.000432557	0.000448179	0.000391334	0.000413256	0.000381486	0.000371845	0.00048063	0.000428473	0.000458423	0.000338213	0.00039139	0.000372479	0.000349329	0.000426801	0.000372114	0.000318516	0.000363643	0.000358252	0.000330875	0.000297093	0.000332251	0.00028419	0.000373527	0.000378045	0.000366218	0.000279949	0.000299149	0.000266817	0.000277132	0.000297813	0.000273943
Neuron_635	0.000680949	0.000632962	0.000598387	0.000400335	0.000299907	0.000262375	0.000243485	0.000226495	0.000177343	0.00017438	0.000171168	0.000164421	0.000140767	0.000162596	0.000155045	0.000148267	0.000133614	0.00013671	0.000142263	0.000133054	0.000138674	0.000134161	0.000117491	0.000108425	0.000149536	0.000125796	0.00013547	0.000112642	0.000113869	0.000114296	0.000100336	0.000121015	0.000103656	8.10862e-05	9.55148e-05	0.000112439	9.89753e-05	8.61386e-05	0.000125425	7.97404e-05	0.000121834	0.00010185	9.73935e-05	0.000103795	0.000109948	7.0146e-05	7.82281e-05	8.55441e-05	8.5008e-05
Neuron_636	0.00146323	0.00120198	0.00112113	0.000836642	0.000673085	0.000598286	0.0005043	0.000472338	0.000388154	0.000363688	0.000396319	0.000346033	0.000328183	0.000355105	0.000407148	0.000331548	0.000297154	0.000268736	0.000293862	0.000308723	0.000291716	0.000290809	0.000260673	0.00023956	0.000268448	0.000246901	0.00027436	0.000236444	0.000242324	0.000251677	0.000262441	0.00025783	0.000249222	0.000229343	0.000198749	0.000230014	0.000231571	0.000232783	0.00023911	0.000189937	0.000243006	0.000188202	0.00019626	0.000188915	0.000212841	0.000194965	0.000163463	0.000186218	0.000179358
Neuron_637	0.00127054	0.00110203	0.0010379	0.00074244	0.000605181	0.000517711	0.000468024	0.000443184	0.000339736	0.000368683	0.000362342	0.000329634	0.000314448	0.000341384	0.00031833	0.000305555	0.00029072	0.000262005	0.000280848	0.000293886	0.000288739	0.000273762	0.000234004	0.000232013	0.000253035	0.000245167	0.000260807	0.000213682	0.000239963	0.00023325	0.000239369	0.000234806	0.000218996	0.000202356	0.000178598	0.000236537	0.000206815	0.000222568	0.0002338	0.000191849	0.000229111	0.000198601	0.000201437	0.000198831	0.000205767	0.00017271	0.000172695	0.000174314	0.000168777
Neuron_638	0.000918478	0.000639643	0.000583547	0.000475012	0.000417572	0.000338372	0.000285225	0.000291183	0.000243666	0.000220054	0.000262392	0.000231362	0.000224196	0.000222753	0.000260227	0.000230938	0.000208519	0.000186302	0.000200494	0.000221385	0.000180223	0.000193139	0.000188283	0.000183119	0.000179175	0.000179407	0.000200881	0.00016618	0.000174318	0.000172091	0.000165692	0.000179382	0.000179282	0.000172286	0.000173333	0.000172998	0.000149966	0.000144604	0.000152422	0.000157999	0.000159439	0.000140321	0.000155514	0.000123364	0.00013367	0.000147842	0.000113216	0.000127395	0.000120891
Neuron_639	0.00122472	0.00116199	0.00108413	0.000825433	0.000761644	0.000680145	0.000616346	0.000594211	0.000502227	0.000500305	0.000525815	0.000456904	0.000423127	0.000440878	0.000446472	0.000461948	0.000436572	0.000404333	0.000402572	0.000427034	0.000372136	0.000390587	0.000352018	0.000352746	0.000404388	0.000388226	0.000409601	0.000326865	0.000371099	0.000344096	0.000324193	0.000378582	0.000358137	0.000331923	0.000336842	0.000341096	0.000309838	0.000290202	0.000319786	0.000295485	0.000347541	0.000364752	0.000340289	0.00026666	0.000280541	0.000275672	0.000263718	0.000265718	0.000260671
Neuron_640	0.00125177	0.00128021	0.0011107	0.000858263	0.000741537	0.000693639	0.000586779	0.000541246	0.000457507	0.000478918	0.000473954	0.000412438	0.000397879	0.000423561	0.000486336	0.000439518	0.000401758	0.000325577	0.00034553	0.000372566	0.000353219	0.000338291	0.000317939	0.000314464	0.000349848	0.000308145	0.000323999	0.00026503	0.000315026	0.000269881	0.000321025	0.000330972	0.000273768	0.000294307	0.000250337	0.000287202	0.000254587	0.000282254	0.000267115	0.000231969	0.000293835	0.000300217	0.000264914	0.000228878	0.000227671	0.000240718	0.000221612	0.000243902	0.000221247
Neuron_641	0.00128855	0.00112517	0.00115596	0.00084211	0.000665783	0.00062813	0.00055116	0.00053313	0.00042411	0.000434282	0.000456138	0.000417668	0.000367496	0.000406931	0.000431416	0.000378447	0.00037872	0.000352321	0.000360211	0.000348378	0.000336066	0.000323156	0.000308634	0.000292134	0.000362361	0.000309054	0.00033998	0.000294893	0.000317074	0.000294386	0.000291567	0.000306643	0.000267767	0.00025881	0.000264995	0.000302383	0.000255863	0.000250748	0.000302982	0.000217483	0.000305977	0.000279323	0.000261163	0.000236474	0.000260955	0.000219885	0.000214101	0.000225966	0.000242691
Neuron_642	0.00122408	0.0010384	0.000946173	0.000697793	0.000524734	0.000435692	0.000385739	0.000347334	0.000287616	0.000251625	0.000269187	0.00023103	0.000233622	0.000246161	0.000246445	0.000217895	0.0001813	0.000169255	0.000195705	0.000200387	0.000190718	0.000193835	0.000184268	0.000158836	0.000203748	0.00018225	0.000193625	0.000133316	0.000148274	0.000170587	0.000162525	0.000180064	0.000161758	0.000133007	0.000134727	0.000147555	0.00014689	0.000133036	0.00015817	0.000113812	0.000165208	0.000128633	0.000137525	0.000133009	0.000135266	0.000113574	0.000104954	0.000127068	0.000124195
Neuron_643	0.00101516	0.000969081	0.000843096	0.000647896	0.000529831	0.000461874	0.000401542	0.000376282	0.000316962	0.000286152	0.000306858	0.000282315	0.00027571	0.000285967	0.000327411	0.0002818	0.000245988	0.000215196	0.000244036	0.000262855	0.000224355	0.000229962	0.0002353	0.00020656	0.00024058	0.000217364	0.000230703	0.000190299	0.000200956	0.000203995	0.000206153	0.00022174	0.000211223	0.000195149	0.000195694	0.000186208	0.000187078	0.000170156	0.000179896	0.000162113	0.000204591	0.000167698	0.000171114	0.000147025	0.000162281	0.000171363	0.000129624	0.000152015	0.000157517
Neuron_644	0.00132015	0.00116615	0.00105388	0.000801994	0.000651159	0.000611694	0.000506856	0.000490826	0.00041798	0.000408368	0.000447266	0.000393048	0.000331228	0.000366411	0.000402723	0.000399949	0.000364471	0.000354821	0.000347095	0.000350433	0.000298879	0.000312007	0.000297369	0.000293929	0.00036866	0.000294311	0.000333618	0.000286414	0.000296719	0.000255054	0.000257349	0.000285022	0.000254601	0.000273479	0.000266681	0.000275229	0.000234345	0.000233636	0.000262509	0.00024448	0.000270073	0.000281909	0.000260441	0.000209739	0.000237247	0.000222513	0.000209971	0.000230468	0.000214091
Neuron_645	0.00118727	0.00117594	0.000989758	0.000741894	0.000686003	0.000607437	0.000515514	0.000502412	0.000445418	0.000431186	0.000456279	0.000396611	0.000369218	0.000399004	0.000411491	0.000382109	0.000366088	0.00034185	0.000345726	0.000377	0.000331427	0.00035553	0.000320355	0.000311991	0.000340903	0.000324699	0.000350352	0.00027008	0.000307183	0.000309719	0.000283553	0.00032468	0.000321866	0.000296542	0.000284207	0.000300421	0.000262727	0.000242613	0.000278731	0.000272837	0.000295806	0.000304534	0.000298815	0.000233456	0.000235988	0.000243533	0.000221373	0.000225493	0.000226192
Neuron_646	0.00169726	0.00175754	0.00160741	0.00110123	0.000796794	0.000741247	0.000642306	0.00062569	0.000505163	0.000472668	0.000507632	0.000441341	0.000386944	0.000401795	0.000426542	0.000471481	0.000377374	0.000379618	0.00038123	0.00038484	0.000356168	0.000340131	0.000332059	0.000310339	0.000437165	0.000361762	0.000403268	0.000308354	0.000315996	0.000312571	0.000293191	0.000353239	0.000298334	0.000257777	0.000300383	0.000310677	0.000275329	0.000242332	0.000297864	0.00024778	0.00031367	0.000312209	0.000289743	0.000249747	0.000260089	0.00021738	0.00021211	0.000270582	0.000253938
Neuron_647	0.00136834	0.00113388	0.00104865	0.00075783	0.000600098	0.000526297	0.000463424	0.000473826	0.000385787	0.000356136	0.000395052	0.000360598	0.000313377	0.000315604	0.000344608	0.00034187	0.000298732	0.000300801	0.000310889	0.00032469	0.00027239	0.000282273	0.000270136	0.000256654	0.000308771	0.000272006	0.000307436	0.000259482	0.000254993	0.000254154	0.000233761	0.000263465	0.000262756	0.000238083	0.000263201	0.000250009	0.000219197	0.000193627	0.000231532	0.000220496	0.000256746	0.000252212	0.000242803	0.00019475	0.000196897	0.000202229	0.000172478	0.000193022	0.000194594
Neuron_648	0.00117178	0.000981148	0.00084579	0.000621197	0.00050892	0.000466348	0.000399231	0.000394174	0.000326951	0.000315272	0.000326817	0.000294211	0.000240284	0.000273325	0.000287226	0.000307129	0.000268133	0.000276366	0.000261157	0.00026367	0.000235478	0.000255331	0.000225393	0.000224647	0.000292446	0.00023165	0.000269064	0.000222395	0.000221569	0.000207914	0.00018978	0.000227319	0.00020493	0.00018542	0.000199564	0.000235185	0.000190051	0.000184461	0.000215855	0.000192623	0.000207793	0.00020491	0.000209573	0.000183542	0.00019978	0.000154988	0.000160957	0.000193747	0.000156534
Neuron_649	0.00122073	0.00102453	0.00093262	0.000798908	0.000657453	0.000595215	0.000482539	0.000474096	0.000412524	0.000373702	0.000435317	0.000390836	0.000334443	0.000366189	0.00038873	0.000371803	0.000354758	0.000324738	0.000346643	0.000321518	0.000289568	0.000305344	0.000274937	0.000275116	0.000355571	0.000294007	0.000328268	0.000264505	0.000297278	0.000268544	0.00027713	0.00031819	0.000264049	0.000257654	0.000255657	0.000295927	0.000241884	0.000245525	0.000276657	0.000218409	0.000285578	0.000275703	0.000263694	0.000217587	0.000243955	0.00021821	0.000209527	0.000231492	0.000227195
Neuron_650	0.00131391	0.00121451	0.00114458	0.000773824	0.000555664	0.00052864	0.000469477	0.000433727	0.00036551	0.000369962	0.000367801	0.000331388	0.000278521	0.000338046	0.000378441	0.000315551	0.000297215	0.000263713	0.000287363	0.000283055	0.000268924	0.000282737	0.0002518	0.000236313	0.000291194	0.000212631	0.000265429	0.000229142	0.000241115	0.000219862	0.000249148	0.0002572	0.000216183	0.000200105	0.000174702	0.000213145	0.000206695	0.000195501	0.000239854	0.000168863	0.000244608	0.000206562	0.000199736	0.000202967	0.000211114	0.000167826	0.000161302	0.000190904	0.000182287
Neuron_651	0.0014588	0.00120128	0.00113276	0.000816746	0.000673559	0.000539916	0.000519438	0.000464609	0.000399384	0.000386361	0.000375717	0.000351175	0.000309977	0.000369974	0.000348486	0.000318729	0.000297359	0.000276872	0.000306017	0.000312048	0.000304989	0.000333973	0.000271147	0.00025351	0.000309648	0.000255818	0.000310424	0.000224376	0.000234921	0.000264647	0.000263332	0.000261563	0.000270084	0.000213062	0.00020517	0.000244014	0.000241645	0.000221767	0.000255281	0.000201956	0.000253172	0.000200011	0.000227697	0.000239868	0.0002326	0.000184082	0.000166681	0.000214561	0.000185873
Neuron_652	0.00156601	0.00142057	0.00129071	0.000969469	0.000715067	0.000605204	0.000531708	0.000486191	0.00041769	0.000391834	0.000389113	0.000352554	0.000323085	0.000350886	0.000338316	0.000334845	0.000274005	0.000285394	0.00030191	0.000310964	0.000290544	0.000293484	0.000267143	0.000240118	0.000328365	0.000263891	0.000320856	0.000203732	0.000222682	0.000243543	0.000236996	0.000252027	0.00024811	0.000200606	0.000193837	0.000239955	0.000204319	0.000192483	0.000231601	0.000189221	0.000247066	0.000229378	0.000233106	0.000208133	0.000203932	0.000169321	0.000158963	0.000211941	0.000182653
Neuron_653	0.000918038	0.000780894	0.000648775	0.000508407	0.000428755	0.000375353	0.000306514	0.00030732	0.000269704	0.000240071	0.000272162	0.000233784	0.000220342	0.000226002	0.000252927	0.000218469	0.000194123	0.000185952	0.00019762	0.000214815	0.000181669	0.000200387	0.000182747	0.000175855	0.000182395	0.000174835	0.000198711	0.000151534	0.000162847	0.000173476	0.00016878	0.000177164	0.000183895	0.000164575	0.000158392	0.000153483	0.000145444	0.000129316	0.000147984	0.00015394	0.000167492	0.000156327	0.000161961	0.000126316	0.000121148	0.000135023	0.000113177	0.000123596	0.000121944
Neuron_654	0.00094596	0.000886541	0.000748344	0.000530563	0.000452986	0.000407772	0.000356679	0.000333471	0.000266003	0.000277957	0.000248705	0.000224443	0.000212152	0.000230394	0.000209368	0.000249515	0.000211882	0.000203187	0.000196988	0.000214502	0.000196355	0.000203682	0.00016993	0.000171782	0.000218854	0.000196064	0.000209001	0.000161262	0.000177106	0.000176647	0.00015314	0.000198033	0.000168468	0.000142293	0.000158753	0.000173584	0.000158551	0.000155303	0.000157582	0.000145359	0.000157316	0.000164065	0.000164783	0.000142218	0.000153842	0.000120184	0.000132941	0.000138989	0.000119686
Neuron_655	0.000869579	0.000787282	0.000760617	0.000612215	0.000479259	0.000437326	0.000378804	0.000349501	0.000292763	0.000290619	0.000301639	0.000266845	0.000250187	0.000273592	0.000292827	0.000256976	0.000240599	0.000202749	0.000226302	0.000229745	0.000204754	0.000200261	0.000204326	0.000184309	0.000230144	0.00019661	0.000213359	0.000159934	0.000193766	0.000176764	0.000203824	0.000193835	0.000169173	0.000171313	0.000150533	0.000185461	0.000150809	0.000167238	0.000178143	0.000127933	0.000193785	0.000182724	0.000170312	0.0001403	0.000147976	0.000145549	0.000131024	0.000158368	0.000147548
Neuron_656	0.000891942	0.0008696	0.000813171	0.000563729	0.000457096	0.000417412	0.000346243	0.000330585	0.00026995	0.000283787	0.000288816	0.000266806	0.000245086	0.000295315	0.000313008	0.000248026	0.000254484	0.000218105	0.000230173	0.000230663	0.000236736	0.000229556	0.000191842	0.00019522	0.000201165	0.000196033	0.000197127	0.000199407	0.000212924	0.000191964	0.000200898	0.000211707	0.000176803	0.000163736	0.000144193	0.000194083	0.000179821	0.000187641	0.000207192	0.000144556	0.000200609	0.000153035	0.000160651	0.000166578	0.000187141	0.000138678	0.000142633	0.000145965	0.000131651
Neuron_657	0.00119814	0.00110979	0.000957327	0.000695606	0.000576142	0.000498148	0.000399693	0.000392639	0.000347663	0.000312793	0.000333308	0.000282198	0.000270341	0.000286204	0.000334777	0.000293894	0.000246959	0.000231597	0.000238436	0.000283393	0.000233548	0.000247464	0.000242872	0.000232611	0.000236108	0.000233299	0.000271002	0.000189425	0.000206312	0.000216159	0.000194264	0.000235961	0.000234113	0.000200439	0.00018588	0.000215553	0.000186764	0.000162488	0.000192232	0.000200341	0.000196555	0.000185789	0.000204121	0.000160236	0.000161379	0.000163624	0.000131529	0.000172036	0.000146082
Neuron_658	0.000768925	0.00069135	0.000575039	0.000434686	0.000365155	0.000322625	0.000289423	0.000259858	0.000219393	0.00020741	0.000198032	0.000191812	0.000186164	0.000204825	0.000210988	0.000197787	0.00017671	0.000150444	0.000165407	0.000171176	0.000163653	0.000166666	0.000159431	0.000146193	0.000173811	0.000149753	0.000155988	0.000116494	0.000142398	0.000138602	0.000138257	0.000154671	0.000131313	0.000114361	0.000122013	0.000128525	0.000116796	0.0001156	0.000129886	0.000103799	0.00013372	0.00012161	0.000119184	0.000111728	0.000118964	9.97527e-05	9.45543e-05	0.000107705	0.000103649
Neuron_659	0.000485999	0.000434582	0.000430877	0.000317682	0.000277013	0.000239597	0.000216245	0.0001996	0.000169125	0.000161539	0.000176555	0.000155586	0.000142815	0.00016283	0.000174568	0.00015177	0.000143164	0.000124928	0.000136573	0.000138257	0.000128876	0.00013825	0.000123892	0.000120692	0.000137361	0.000121835	0.000131374	0.000106957	0.000116826	0.000118412	0.000117122	0.000129739	0.000121775	0.000106528	0.000103167	0.000109253	0.000107289	9.80165e-05	0.000111763	9.26377e-05	0.00011565	0.000101035	0.000102956	9.50934e-05	9.78295e-05	9.00047e-05	7.70227e-05	9.14251e-05	8.7376e-05
Neuron_660	0.00103402	0.000942768	0.000858808	0.000658356	0.000611105	0.000555039	0.000493302	0.000459248	0.00038368	0.000394876	0.000402992	0.00034568	0.000310804	0.000324456	0.000304933	0.000372851	0.000327082	0.000326621	0.000307521	0.000325375	0.00028237	0.000297448	0.000241693	0.000256647	0.000340733	0.000285025	0.000330111	0.000247591	0.000277122	0.000249765	0.000225191	0.0002841	0.000263808	0.00024839	0.000257734	0.000254652	0.000235593	0.00022525	0.000228163	0.000234849	0.000242752	0.000277922	0.000264614	0.000199773	0.000218282	0.000201675	0.000206889	0.000202214	0.000181516
Neuron_661	0.000927568	0.000867687	0.000796656	0.000529879	0.00041895	0.000330066	0.000296023	0.00027674	0.000224601	0.000222447	0.000216256	0.000202488	0.000163904	0.000204513	0.000199337	0.000169162	0.000157533	0.000159237	0.000171005	0.000167962	0.00017479	0.000192065	0.000134292	0.000135298	0.000168922	0.000132625	0.000162576	0.000130863	0.000122656	0.000142996	0.000134221	0.000137756	0.000133251	0.000101002	9.49364e-05	0.000132598	0.0001264	0.000119145	0.000148197	0.000107934	0.000133317	0.000103335	0.000118996	0.000138647	0.00013592	8.23784e-05	8.75461e-05	0.000117149	9.28139e-05
Neuron_662	0.00100143	0.000968686	0.000897784	0.000666936	0.00052966	0.000470335	0.000422734	0.000403048	0.000349881	0.000320202	0.000351709	0.000310018	0.00025618	0.00027717	0.000264561	0.000291928	0.000266773	0.000271686	0.000271009	0.0002623	0.000230576	0.000252581	0.000217211	0.000214503	0.00030393	0.00023814	0.000286329	0.000206254	0.000219531	0.000212284	0.000200834	0.00022458	0.000218669	0.000191429	0.000206472	0.000213091	0.00019139	0.000168965	0.000210231	0.000176481	0.000216389	0.00022495	0.000215971	0.000177108	0.000185201	0.000156729	0.000154142	0.000184603	0.000172015
Neuron_663	0.00175774	0.00148907	0.00126213	0.00101777	0.000910793	0.000846378	0.000716763	0.000676112	0.000567348	0.000586562	0.00057145	0.000542331	0.000469389	0.000517898	0.000508689	0.00055632	0.000515219	0.000479717	0.000483351	0.000477065	0.000447576	0.000467018	0.000407185	0.000421107	0.00053375	0.000421744	0.000473903	0.000356939	0.000419871	0.000388895	0.000374016	0.000440908	0.000375743	0.000369498	0.000373088	0.000401368	0.000340919	0.00033593	0.00037538	0.000348365	0.00038249	0.000417974	0.000394926	0.000334021	0.000347493	0.000305285	0.000312651	0.000322776	0.000309147
Neuron_664	0.00114739	0.0011308	0.000995948	0.000758314	0.000618097	0.000542059	0.000403097	0.000392606	0.00034685	0.000295435	0.000353369	0.000285117	0.000281552	0.000289228	0.000374479	0.000283873	0.000252373	0.000220196	0.000241506	0.000264552	0.000218648	0.000232719	0.000241484	0.000228643	0.000233015	0.000225307	0.000256937	0.000193439	0.000208004	0.000204413	0.00020621	0.00024138	0.000236748	0.000209981	0.000198626	0.000196711	0.000198138	0.000162248	0.000183031	0.000185179	0.00020773	0.000175177	0.000187329	0.000144944	0.000156032	0.000173373	0.000130103	0.000171773	0.000161807
Neuron_665	0.00199403	0.00189468	0.00163864	0.00120655	0.0010444	0.000924835	0.00080186	0.000785132	0.000659786	0.000680644	0.000672639	0.000624678	0.0005785	0.000600566	0.000588766	0.000573032	0.000559582	0.000523477	0.000540868	0.000565367	0.000528233	0.00052271	0.000462397	0.000467319	0.000477716	0.000497219	0.000522536	0.000397525	0.000475852	0.000468695	0.000448328	0.000467644	0.000452961	0.000416744	0.000398437	0.000464022	0.000384217	0.000386901	0.000437534	0.000405998	0.000452645	0.000466767	0.000430428	0.000370325	0.000367847	0.000349063	0.00033297	0.000341786	0.000328275
[truncated: 624 more rows]
[truncated: 1 more columns]

## Sheet: SR0.1_β1_test0_Acc
Epoch	Train_Accuracy	Test_Accuracy
0	0.1525	0.2043
1	0.415083	0.5044
2	0.605717	0.7039
3	0.740033	0.7556
4	0.781517	0.7809
5	0.803483	0.8036
6	0.8253	0.8211
7	0.8349	0.826
8	0.841633	0.8281
9	0.847417	0.8328
10	0.852483	0.8376
11	0.857	0.8428
12	0.86135	0.8462
13	0.865067	0.8523
14	0.868133	0.852
15	0.871517	0.8532
16	0.873933	0.8541
17	0.876317	0.8539
18	0.879567	0.8615
19	0.8811	0.8616
20	0.884283	0.8634
21	0.8859	0.8637
22	0.8884	0.866
23	0.89	0.865
24	0.891267	0.8693
25	0.893883	0.8708
[truncated: 24 more rows]

## Sheet: SR0.25_β1_test0_Error
	Epoch_0	Epoch_1	Epoch_2	Epoch_3	Epoch_4	Epoch_5	Epoch_6	Epoch_7	Epoch_8	Epoch_9	Epoch_10	Epoch_11	Epoch_12	Epoch_13	Epoch_14	Epoch_15	Epoch_16	Epoch_17	Epoch_18	Epoch_19	Epoch_20	Epoch_21	Epoch_22	Epoch_23	Epoch_24	Epoch_25	Epoch_26	Epoch_27	Epoch_28	Epoch_29	Epoch_30	Epoch_31	Epoch_32	Epoch_33	Epoch_34	Epoch_35	Epoch_36	Epoch_37	Epoch_38	Epoch_39	Epoch_40	Epoch_41	Epoch_42	Epoch_43	Epoch_44	Epoch_45	Epoch_46	Epoch_47	Epoch_48
[truncated: 1,290 more rows]
[truncated: 1 more columns]

[truncated: 3 more sheets: SR0.25_β1_test0_Acc, SR0.5_β1_test0_Error, SR0.5_β1_test0_Acc]
