# Supplementary material for: Adjoint propagation of error signal through modular recurrent neural networks for biologically plausible learning
Source: eLife. 2026 Feb 16;15:e108237. doi: 10.7554/eLife.108237 (PMC12959881; doi:10.7554/eLife.108237)
Supplement: Appendix 4—figure 1—source data 1. [file elife-108237-app4-fig1-data1.xlsx]

## Sheet: Right_Subplot_ΔW1-W3
Epoch	ΔW1_Mean	ΔW1_Min	ΔW1_Max	ΔW2_Mean	ΔW2_Min	ΔW2_Max	ΔW3_Mean	ΔW3_Min	ΔW3_Max
1	0.794914	0.59659	0.947375	1	1	1	1	1	1
2	0.768194	0.632751	0.915953	1	1	1	1	1	1
3	0.840662	0.706523	0.955423	1	1	1	1	1	1
4	0.855644	0.628634	0.950217	1	1	1	1	1	1
5	0.863129	0.727806	0.968746	1	1	1	1	1	1
6	0.881917	0.741382	0.96403	1	1	1	1	1	1
7	0.879998	0.73064	0.957534	1	1	1	1	1	1
8	0.876728	0.702755	0.96975	1	1	1	1	1	1
9	0.878501	0.742055	0.974822	1	1	1	1	1	1
10	0.885558	0.742981	0.974399	1	1	1	1	1	1
11	0.896937	0.784308	0.978485	1	1	1	1	1	1
12	0.896556	0.768058	0.969756	1	1	1	1	1	1
13	0.894814	0.701392	0.963745	1	1	1	1	1	1
14	0.899184	0.725225	0.96616	1	1	1	1	1	1
15	0.895776	0.765752	0.976108	1	1	1	1	1	1
16	0.896961	0.792138	0.972275	1	1	1	1	1	1
17	0.901319	0.771317	0.971663	1	1	1	1	1	1
18	0.908813	0.811986	0.98388	1	1	1	1	1	1
19	0.911269	0.814209	0.974781	1	1	1	1	1	1
20	0.905066	0.772365	0.974055	1	1	1	1	1	1

## Sheet: Left_Subplot_e1-e5
Epoch	e1_Mean	e1_Min	e1_Max	e2_Mean	e2_Min	e2_Max	e3_Mean	e3_Min	e3_Max	e4_Mean	e4_Min	e4_Max	e5_Mean	e5_Min	e5_Max
1	0.706076	0.417211	0.858158	1	1	1	0.709053	0.480646	0.854044	0.684788	0.43579	0.862993	1	1	1
2	0.748598	0.441614	0.941695	1	1	1	0.748645	0.501576	0.917167	0.733796	0.515721	0.906066	1	1	1
3	0.796703	0.432903	0.94915	1	1	1	0.782322	0.419002	0.94355	0.770991	0.405167	0.942967	1	1	1
4	0.788656	0.471258	0.949075	1	1	1	0.774327	0.370255	0.947972	0.764252	0.422817	0.964242	1	1	1
5	0.786395	0.438521	0.962752	1	1	1	0.773321	0.394541	0.953944	0.764025	0.435696	0.962115	1	1	1
6	0.810145	0.48112	0.968766	1	1	1	0.800121	0.341292	0.963626	0.787047	0.403225	0.9702	1	1	1
7	0.806288	0.411631	0.96083	1	1	1	0.798113	0.450199	0.958344	0.785258	0.359096	0.968712	1	1	1
8	0.799517	0.387729	0.978088	1	1	1	0.788605	0.434883	0.973757	0.781271	0.422614	0.97732	1	1	1
9	0.814257	0.534438	0.971898	1	1	1	0.802322	0.418772	0.976406	0.7886	0.40659	0.969065	1	1	1
10	0.811754	0.417083	0.978368	1	1	1	0.801163	0.460052	0.97932	0.783697	0.44177	0.980573	1	1	1
11	0.831252	0.436271	0.981771	1	1	1	0.829132	0.525271	0.978402	0.820025	0.576414	0.980781	1	1	1
12	0.835573	0.38859	0.975275	1	1	1	0.822373	0.340572	0.976077	0.809373	0.344691	0.974953	1	1	1
13	0.829911	0.333315	0.973634	1	1	1	0.822638	0.210712	0.968516	0.820172	0.2616	0.977508	1	1	1
14	0.838606	0.462265	0.977763	1	1	1	0.830221	0.453143	0.969425	0.823797	0.398687	0.975062	1	1	1
15	0.832845	0.483555	0.98261	1	1	1	0.823632	0.422418	0.975022	0.816298	0.436947	0.975997	1	1	1
16	0.835846	0.365941	0.974809	1	1	1	0.823247	0.50838	0.975236	0.816297	0.508105	0.981579	1	1	1
17	0.839549	0.387102	0.97124	1	1	1	0.830075	0.403575	0.976244	0.825023	0.457918	0.972687	1	1	1
18	0.844419	0.450243	0.990169	1	1	1	0.835916	0.502667	0.986409	0.833419	0.455312	0.990274	1	1	1
19	0.858095	0.438534	0.979123	1	1	1	0.845255	0.479597	0.973023	0.838723	0.525297	0.975169	1	1	1
20	0.844338	0.368346	0.980042	1	1	1	0.836588	0.312215	0.977092	0.836723	0.427492	0.972894	1	1	1
