# Supplementary material for: Adjoint propagation of error signal through modular recurrent neural networks for biologically plausible learning
Source: eLife. 2026 Feb 16;15:e108237. doi: 10.7554/eLife.108237 (PMC12959881; doi:10.7554/eLife.108237)
Supplement: Appendix 4—figure 2—source data 1. [file elife-108237-app4-fig2-data1.xlsx]

## Sheet: Right_Subplot_ΔW1-W3
Epoch	ΔW1_Mean	ΔW1_Min	ΔW1_Max	ΔW2_Mean	ΔW2_Min	ΔW2_Max	ΔW3_Mean	ΔW3_Min	ΔW3_Max
1	0.791554	0.594906	0.946383	0.999936	0.999802	0.999984	0.999959	0.999821	0.999995
2	0.763045	0.625368	0.915054	0.999587	0.998572	0.999895	0.999768	0.999186	0.999953
3	0.838267	0.712602	0.956081	0.998746	0.996158	0.999551	0.999239	0.998046	0.999732
4	0.852495	0.625618	0.948263	0.997561	0.990881	0.999556	0.998307	0.993075	0.999591
5	0.859897	0.734218	0.964679	0.996888	0.992213	0.999472	0.997385	0.992968	0.999537
6	0.879403	0.718376	0.965528	0.997027	0.993278	0.99936	0.997084	0.993538	0.999351
7	0.876658	0.731068	0.958413	0.996674	0.991152	0.999268	0.996602	0.990494	0.999254
8	0.872899	0.704013	0.966566	0.996151	0.987508	0.999318	0.995779	0.983693	0.999255
9	0.875211	0.750907	0.975662	0.995705	0.983461	0.999363	0.995218	0.97581	0.999238
10	0.882453	0.725951	0.972657	0.99507	0.959287	0.999569	0.994465	0.954763	0.999492
11	0.893134	0.769007	0.978851	0.995878	0.986754	0.999328	0.995288	0.981734	0.999368
12	0.890578	0.777989	0.968427	0.994848	0.974934	0.999062	0.994042	0.954162	0.999281
13	0.889102	0.717463	0.961149	0.995187	0.974966	0.999197	0.994452	0.970487	0.999158
14	0.894674	0.701759	0.965047	0.995426	0.975003	0.999515	0.994903	0.966512	0.999505
15	0.891389	0.764064	0.976162	0.995475	0.982921	0.999282	0.994944	0.979147	0.99941
16	0.891405	0.754691	0.971099	0.99504	0.979613	0.999307	0.994212	0.977652	0.999206
17	0.895249	0.752308	0.96801	0.994979	0.980833	0.999557	0.994348	0.979824	0.999384
18	0.898583	0.79698	0.981481	0.9952	0.977501	0.999582	0.994647	0.976551	0.999566
19	0.902676	0.814627	0.97133	0.995507	0.986105	0.999109	0.995078	0.979768	0.999345
20	0.893202	0.764314	0.969474	0.994854	0.976388	0.999281	0.994461	0.977779	0.999258

## Sheet: Left_Subplot_e1-e5
Epoch	e1_Mean	e1_Min	e1_Max	e2_Mean	e2_Min	e2_Max	e3_Mean	e3_Min	e3_Max	e4_Mean	e4_Min	e4_Max	e5_Mean	e5_Min	e5_Max
1	0.700219	0.404714	0.851555	0.998344	0.994335	0.999567	0.706409	0.478799	0.849349	0.683954	0.433684	0.858845	0.996996	0.981648	0.999424
2	0.741452	0.429075	0.937506	0.996608	0.990411	0.999075	0.74374	0.490489	0.915592	0.728589	0.511815	0.900486	0.995072	0.981032	0.998883
3	0.792165	0.42305	0.947241	0.994457	0.963293	0.998874	0.776886	0.379225	0.942599	0.764386	0.357094	0.944857	0.993651	0.936276	0.998953
4	0.785902	0.438913	0.947862	0.992723	0.956966	0.999031	0.769999	0.342085	0.949042	0.75836	0.414218	0.951855	0.992626	0.963136	0.999087
5	0.779503	0.415923	0.96365	0.992982	0.963542	0.999473	0.765429	0.357462	0.953895	0.755572	0.40248	0.961843	0.993325	0.971954	0.999416
6	0.803874	0.469	0.966628	0.994242	0.975358	0.999599	0.794973	0.30978	0.962017	0.78037	0.375017	0.96836	0.99402	0.973383	0.999455
7	0.799651	0.413689	0.957476	0.994142	0.963762	0.998998	0.795065	0.461171	0.952875	0.780193	0.357837	0.960521	0.994006	0.968813	0.99924
8	0.788474	0.415458	0.97342	0.993064	0.973637	0.999406	0.779916	0.424962	0.971974	0.772106	0.40706	0.976937	0.993133	0.971645	0.999484
9	0.802112	0.473069	0.974084	0.992197	0.964467	0.999593	0.793541	0.386627	0.976593	0.778204	0.380758	0.970719	0.991773	0.938234	0.999774
10	0.803844	0.403909	0.973489	0.991418	0.936639	0.999551	0.793049	0.43417	0.974913	0.774649	0.411959	0.975351	0.990675	0.930395	0.9996
11	0.821423	0.49371	0.977567	0.993602	0.96867	0.999562	0.820771	0.507507	0.975255	0.811423	0.540604	0.979501	0.993748	0.955098	0.999654
12	0.826168	0.321424	0.975307	0.990896	0.929258	0.999397	0.812341	0.279382	0.971337	0.798027	0.34491	0.970313	0.990637	0.930225	0.999522
13	0.818851	0.315395	0.968237	0.992474	0.954387	0.999432	0.813048	0.230951	0.970411	0.808442	0.245409	0.969837	0.992334	0.936125	0.999576
14	0.827614	0.424761	0.974948	0.992856	0.940233	0.99968	0.819758	0.4005	0.973222	0.811202	0.370062	0.982987	0.992721	0.914596	0.999659
15	0.821514	0.421772	0.976268	0.99312	0.95609	0.999517	0.813785	0.43314	0.973972	0.804902	0.429753	0.970646	0.992913	0.958818	0.999755
16	0.823844	0.406825	0.976829	0.99249	0.946365	0.999474	0.812016	0.471802	0.976085	0.802665	0.508409	0.979038	0.992149	0.962257	0.999771
17	0.829516	0.465871	0.972661	0.992273	0.952039	0.999784	0.8205	0.494138	0.971717	0.8133	0.443156	0.970749	0.992274	0.960919	0.99982
18	0.832874	0.478062	0.98846	0.993134	0.943138	0.999869	0.824306	0.487991	0.98587	0.816167	0.501073	0.988876	0.99306	0.942512	0.999888
19	0.848058	0.41161	0.975812	0.993951	0.966073	0.999543	0.837983	0.481212	0.975475	0.829167	0.505591	0.977807	0.994022	0.96106	0.999555
20	0.82779	0.346033	0.97884	0.992507	0.916076	0.99948	0.824007	0.306711	0.977003	0.820394	0.426067	0.976701	0.992353	0.920653	0.999833
