# Supplementary material for: Adjoint propagation of error signal through modular recurrent neural networks for biologically plausible learning
Source: eLife. 2026 Feb 16;15:e108237. doi: 10.7554/eLife.108237 (PMC12959881; doi:10.7554/eLife.108237)
Supplement: Figure 2—source data 1. [file elife-108237-fig2-data1.xlsx]

## Sheet: Sheet1
Epoch	MNIST-Training-Ave	MNIST-Test-Ave	MNIST-Training-Max	MNIST-Test-Max	MNIST-Training-Min	MNIST-Test-Min	FMNIST-Training-Ave	FMNIST-Test-Ave	FMNIST-Training-Max	FMNIST-Test-Max	FMNIST-Training-Min	FMNIST-Test-Min
1	0.818667	0.8273	0.818667	0.8273	0.818667	0.8273	0.674367	0.6636	0.674367	0.6636	0.674367	0.6636
2	0.889883	0.8933	0.889883	0.8933	0.889883	0.8933	0.77745	0.7677	0.77745	0.7677	0.77745	0.7677
3	0.90555	0.9104	0.90555	0.9104	0.90555	0.9104	0.8184	0.805	0.8184	0.805	0.8184	0.805
4	0.91705	0.9195	0.91705	0.9195	0.91705	0.9195	0.836083	0.8251	0.836083	0.8251	0.836083	0.8251
5	0.92525	0.9255	0.92525	0.9255	0.92525	0.9255	0.846583	0.8325	0.846583	0.8325	0.846583	0.8325
6	0.931933	0.9309	0.931933	0.9309	0.931933	0.9309	0.853767	0.8395	0.853767	0.8395	0.853767	0.8395
7	0.93735	0.9358	0.93735	0.9358	0.93735	0.9358	0.857867	0.8429	0.857867	0.8429	0.857867	0.8429
8	0.9429	0.9389	0.9429	0.9389	0.9429	0.9389	0.862817	0.8479	0.862817	0.8479	0.862817	0.8479
9	0.947483	0.9431	0.947483	0.9431	0.947483	0.9431	0.86585	0.8491	0.86585	0.8491	0.86585	0.8491
10	0.950233	0.9462	0.950233	0.9462	0.950233	0.9462	0.869617	0.8544	0.869617	0.8544	0.869617	0.8544
11	0.954483	0.9498	0.954483	0.9498	0.954483	0.9498	0.875817	0.8581	0.875817	0.8581	0.875817	0.8581
12	0.95715	0.9518	0.95715	0.9518	0.95715	0.9518	0.877867	0.8599	0.877867	0.8599	0.877867	0.8599
13	0.96045	0.9546	0.96045	0.9546	0.96045	0.9546	0.880783	0.8628	0.880783	0.8628	0.880783	0.8628
14	0.962817	0.9556	0.962817	0.9556	0.962817	0.9556	0.882667	0.8623	0.882667	0.8623	0.882667	0.8623
15	0.965767	0.9574	0.965767	0.9574	0.965767	0.9574	0.887383	0.868	0.887383	0.868	0.887383	0.868
16	0.967683	0.9596	0.967683	0.9596	0.967683	0.9596	0.888067	0.8654	0.888067	0.8654	0.888067	0.8654
17	0.9695	0.9605	0.9695	0.9605	0.9695	0.9605	0.891183	0.869	0.891183	0.869	0.891183	0.869
18	0.972017	0.9621	0.972017	0.9621	0.972017	0.9621	0.893083	0.8695	0.893083	0.8695	0.893083	0.8695
19	0.973517	0.9637	0.973517	0.9637	0.973517	0.9637	0.895817	0.8711	0.895817	0.8711	0.895817	0.8711
20	0.976033	0.9644	0.976033	0.9644	0.976033	0.9644	0.896283	0.8719	0.896283	0.8719	0.896283	0.8719
21	0.977367	0.966	0.977367	0.966	0.977367	0.966	0.89885	0.8729	0.89885	0.8729	0.89885	0.8729
22	0.97915	0.9667	0.97915	0.9667	0.97915	0.9667	0.900283	0.8741	0.900283	0.8741	0.900283	0.8741
23	0.980167	0.9675	0.980167	0.9675	0.980167	0.9675	0.903317	0.8741	0.903317	0.8741	0.903317	0.8741
24	0.981333	0.9681	0.981333	0.9681	0.981333	0.9681	0.904633	0.8771	0.904633	0.8771	0.904633	0.8771
25	0.982817	0.9681	0.982817	0.9681	0.982817	0.9681	0.9065	0.877	0.9065	0.877	0.9065	0.877
26	0.984267	0.9691	0.984267	0.9691	0.984267	0.9691	0.908967	0.8776	0.908967	0.8776	0.908967	0.8776
27	0.985333	0.9697	0.985333	0.9697	0.985333	0.9697	0.910733	0.8789	0.910733	0.8789	0.910733	0.8789
28	0.98695	0.9704	0.98695	0.9704	0.98695	0.9704	0.911533	0.878	0.911533	0.878	0.911533	0.878
29	0.98745	0.9707	0.98745	0.9707	0.98745	0.9707	0.911533	0.8778	0.911533	0.8778	0.911533	0.8778
30	0.989117	0.9705	0.989117	0.9705	0.989117	0.9705	0.915733	0.8808	0.915733	0.8808	0.915733	0.8808
31	0.99045	0.971	0.99045	0.971	0.99045	0.971	0.9124	0.8769	0.9124	0.8769	0.9124	0.8769
32	0.99075	0.9707	0.99075	0.9707	0.99075	0.9707	0.916867	0.8787	0.916867	0.8787	0.916867	0.8787
33	0.991583	0.9716	0.991583	0.9716	0.991583	0.9716	0.92005	0.8846	0.92005	0.8846	0.92005	0.8846
34	0.992533	0.9716	0.992533	0.9716	0.992533	0.9716	0.9196	0.8825	0.9196	0.8825	0.9196	0.8825
35	0.993817	0.9729	0.993817	0.9729	0.993817	0.9729	0.92185	0.8827	0.92185	0.8827	0.92185	0.8827
36	0.994367	0.9721	0.994367	0.9721	0.994367	0.9721	0.924683	0.8841	0.924683	0.8841	0.924683	0.8841
37	0.994533	0.9728	0.994533	0.9728	0.994533	0.9728	0.92595	0.8844	0.92595	0.8844	0.92595	0.8844
38	0.995217	0.9731	0.995217	0.9731	0.995217	0.9731	0.924683	0.8819	0.924683	0.8819	0.924683	0.8819
39	0.995933	0.9738	0.995933	0.9738	0.995933	0.9738	0.928083	0.8848	0.928083	0.8848	0.928083	0.8848
40	0.996417	0.9731	0.996417	0.9731	0.996417	0.9731	0.928283	0.8829	0.928283	0.8829	0.928283	0.8829
41	0.997317	0.973	0.997317	0.973	0.997317	0.973	0.9277	0.8861	0.9277	0.8861	0.9277	0.8861
42	0.997367	0.9725	0.997367	0.9725	0.997367	0.9725	0.9341	0.8875	0.9341	0.8875	0.9341	0.8875
43	0.997883	0.9736	0.997883	0.9736	0.997883	0.9736	0.933667	0.8866	0.933667	0.8866	0.933667	0.8866
44	0.998317	0.9747	0.998317	0.9747	0.998317	0.9747	0.935167	0.8865	0.935167	0.8865	0.935167	0.8865
45	0.9985	0.974	0.9985	0.974	0.9985	0.974	0.93655	0.8873	0.93655	0.8873	0.93655	0.8873
46	0.998783	0.9741	0.998783	0.9741	0.998783	0.9741	0.938867	0.8878	0.938867	0.8878	0.938867	0.8878
47	0.998883	0.9737	0.998883	0.9737	0.998883	0.9737	0.937483	0.8839	0.937483	0.8839	0.937483	0.8839
48	0.999183	0.973	0.999183	0.973	0.999183	0.973	0.938767	0.8873	0.938767	0.8873	0.938767	0.8873
49	0.999317	0.9746	0.999317	0.9746	0.999317	0.9746	0.9427	0.8875	0.9427	0.8875	0.9427	0.8875
50	0.9993	0.9719	0.9993	0.9719	0.9993	0.9719	0.942267	0.8858	0.942267	0.8858	0.942267	0.8858
51	0.9996	0.9734	0.9996	0.9734	0.9996	0.9734	0.944967	0.8864	0.944967	0.8864	0.944967	0.8864
52	0.999583	0.9741	0.999583	0.9741	0.999583	0.9741	0.945483	0.8897	0.945483	0.8897	0.945483	0.8897
53	0.9997	0.9743	0.9997	0.9743	0.9997	0.9743	0.9432	0.8838	0.9432	0.8838	0.9432	0.8838
54	0.99975	0.9744	0.99975	0.9744	0.99975	0.9744	0.948133	0.8872	0.948133	0.8872	0.948133	0.8872
55	0.999817	0.9746	0.999817	0.9746	0.999817	0.9746	0.947217	0.8881	0.947217	0.8881	0.947217	0.8881
56	0.9999	0.9739	0.9999	0.9739	0.9999	0.9739	0.949433	0.8862	0.949433	0.8862	0.949433	0.8862
57							0.947967	0.8856	0.947967	0.8856	0.947967	0.8856
58							0.94965	0.8873	0.94965	0.8873	0.94965	0.8873
59							0.952517	0.8879	0.952517	0.8879	0.952517	0.8879
60							0.9539	0.889	0.9539	0.889	0.9539	0.889
61							0.955	0.8878	0.955	0.8878	0.955	0.8878
62							0.955017	0.8895	0.955017	0.8895	0.955017	0.8895
63							0.959367	0.8889	0.959367	0.8889	0.959367	0.8889
64							0.95115	0.8866	0.95115	0.8866	0.95115	0.8866
65							0.9554	0.8848	0.9554	0.8848	0.9554	0.8848
66							0.955633	0.8824	0.955633	0.8824	0.955633	0.8824
67							0.959783	0.8887	0.959783	0.8887	0.959783	0.8887
68							0.961167	0.8875	0.961167	0.8875	0.961167	0.8875
69							0.963733	0.8879	0.963733	0.8879	0.963733	0.8879
70							0.961983	0.8879	0.961983	0.8879	0.961983	0.8879
71							0.958783	0.8823	0.958783	0.8823	0.958783	0.8823
72							0.965567	0.8888	0.965567	0.8888	0.965567	0.8888
73							0.968083	0.8884	0.968083	0.8884	0.968083	0.8884
74							0.965867	0.888	0.965867	0.888	0.965867	0.888
75							0.96055	0.8852	0.96055	0.8852	0.96055	0.8852
76							0.969317	0.8851	0.969317	0.8851	0.969317	0.8851
77							0.9664	0.8869	0.9664	0.8869	0.9664	0.8869
78							0.969133	0.8868	0.969133	0.8868	0.969133	0.8868
79							0.96525	0.8853	0.96525	0.8853	0.96525	0.8853
80							0.970517	0.8893	0.970517	0.8893	0.970517	0.8893
81							0.9714	0.8856	0.9714	0.8856	0.9714	0.8856
82							0.975133	0.8888	0.975133	0.8888	0.975133	0.8888
83							0.973467	0.8854	0.973467	0.8854	0.973467	0.8854
84							0.97315	0.8861	0.97315	0.8861	0.97315	0.8861
85							0.97375	0.885	0.97375	0.885	0.97375	0.885
86							0.973567	0.8869	0.973567	0.8869	0.973567	0.8869
87							0.973467	0.886	0.973467	0.886	0.973467	0.886
88							0.977083	0.8859	0.977083	0.8859	0.977083	0.8859
89							0.9644	0.8775	0.9644	0.8775	0.9644	0.8775
90							0.979033	0.8866	0.979033	0.8866	0.979033	0.8866
91							0.975883	0.8873	0.975883	0.8873	0.975883	0.8873
92							0.979517	0.8875	0.979517	0.8875	0.979517	0.8875
93							0.978817	0.8869	0.978817	0.8869	0.978817	0.8869
94							0.982967	0.8893	0.982967	0.8893	0.982967	0.8893
95							0.982217	0.8849	0.982217	0.8849	0.982217	0.8849
96							0.97995	0.8832	0.97995	0.8832	0.97995	0.8832
97							0.98145	0.8864	0.98145	0.8864	0.98145	0.8864
98							0.982067	0.8863	0.982067	0.8863	0.982067	0.8863
99							0.985117	0.888	0.985117	0.888	0.985117	0.888
100							0.978283	0.8853	0.978283	0.8853	0.978283	0.8853
