# Supplementary material for: Adjoint propagation of error signal through modular recurrent neural networks for biologically plausible learning
Source: eLife. 2026 Feb 16;15:e108237. doi: 10.7554/eLife.108237 (PMC12959881; doi:10.7554/eLife.108237)
Supplement: Figure 2—source data 2. [file elife-108237-fig2-data2.xlsx]

## Sheet: Sheet1
SR	FTMLE,te=8 (ave,min,max)	MLE,te=10000 (ave,min,max)	Test Accuracy (ave,min,max)
0.01	[-4.6091040029995005, -4.610121592095352, -4.608265956051543]	[-4.657256858916592, -4.722552991106687, -4.633672909301597]	[0.8663000000000001, 0.8655, 0.8674]
0.1	[-2.3061895908258525, -2.307237757505491, -2.305069167597601]	[-2.342430292141778, -2.361497808747582, -2.3176343722867885]	[0.8893799999999998, 0.8884, 0.8905]
0.25	[-1.389586252681652, -1.389978742878769, -1.388879010957637]	[-1.4287681045892078, -1.479083429414421, -1.3866950086395298]	[0.8900599999999999, 0.889, 0.8911]
0.5	[-0.6977634898272699, -0.6993307604431765, -0.6961194425027469]	[-0.7321830636374087, -0.7530781873805793, -0.7054329615405787]	[0.8871, 0.8849, 0.889]
0.75	[-0.29419247374193747, -0.2966187558159561, -0.29133747152483797]	[-0.33162159632642985, -0.3619862199454847, -0.3045959302504818]	[0.8807599999999999, 0.8784, 0.8842]
1	[-0.01777141268686511, -0.029532396363335052, -0.012314348450592209]	[-0.04424261083468646, -0.06028332299960204, -0.0326348937444799]	[0.86568, 0.8622, 0.8712]
1.25	[0.003618330396717423, -7.01041362836597e-05, 0.008203572770595675]	[0.14261007717958493, 0.11686463405969465, 0.16319847540821136]	[0.8394600000000001, 0.835, 0.843]
1.5	[0.03487550223536025, 0.014049486781544192, 0.057088744734558584]	[0.281903143667405, 0.2561624887755054, 0.3212756178537575]	[0.8122999999999999, 0.8078, 0.8168]
2	[0.1361880303480399, 0.12549751022181319, 0.14862460297511146]	[0.4224754397639797, 0.3997567873776601, 0.4399999459860893]	[0.6378999999999999, 0.6269, 0.659]
