# Supplementary material for: Adjoint propagation of error signal through modular recurrent neural networks for biologically plausible learning
Source: eLife. 2026 Feb 16;15:e108237. doi: 10.7554/eLife.108237 (PMC12959881; doi:10.7554/eLife.108237)
Supplement: Figure 2—source data 3. [file elife-108237-fig2-data3.xlsx]

## Sheet: u1
	Epoch_0	Epoch_1	Epoch_2	Epoch_3	Epoch_4	Epoch_5	Epoch_6	Epoch_7	Epoch_8	Epoch_9	Epoch_10	Epoch_11	Epoch_12	Epoch_13	Epoch_14	Epoch_15	Epoch_16	Epoch_17	Epoch_18	Epoch_19	Epoch_20	Epoch_21	Epoch_22	Epoch_23	Epoch_24	Epoch_25	Epoch_26	Epoch_27	Epoch_28	Epoch_29	Epoch_30	Epoch_31	Epoch_32	Epoch_33	Epoch_34	Epoch_35	Epoch_36	Epoch_37	Epoch_38	Epoch_39	Epoch_40	Epoch_41	Epoch_42	Epoch_43	Epoch_44	Epoch_45	Epoch_46	Epoch_47	Epoch_48
Neuron_0	0.00987451	0.00986326	0.00986483	0.00986482	0.00986482	0.00986482	0.00986482	0.00986482	0.00986482	0.00986482	0.00986482	0.00986482	0.00986482	0.00986482	0.00986482	0.00986482	0.00986482	0.00986482	0.00986482	0.00986482	0.00986482	0.00986482	0.00986482	0.00986482	0.00986482	0.00986482	0.00986482	0.00986482	0.00986482	0.00986482	0.00986482	0.00986482	0.00986482	0.00986482	0.00986482	0.00986482	0.00986482	0.00986482	0.00986482	0.00986482	0.00986482	0.00986482	0.00986482	0.00986482	0.00986482	0.00986482	0.00986482	0.00986482	0.00986482
Neuron_1	0.0984241	0.09727	0.0972766	0.0972766	0.0972766	0.0972766	0.0972766	0.0972766	0.0972766	0.0972766	0.0972766	0.0972766	0.0972766	0.0972766	0.0972766	0.0972766	0.0972766	0.0972766	0.0972766	0.0972766	0.0972766	0.0972766	0.0972766	0.0972766	0.0972766	0.0972766	0.0972766	0.0972766	0.0972766	0.0972766	0.0972766	0.0972766	0.0972766	0.0972766	0.0972766	0.0972766	0.0972766	0.0972766	0.0972766	0.0972766	0.0972766	0.0972766	0.0972766	0.0972766	0.0972766	0.0972766	0.0972766	0.0972766	0.0972766
Neuron_2	0.0483249	0.0480707	0.0480639	0.0480638	0.0480638	0.0480638	0.0480638	0.0480638	0.0480638	0.0480638	0.0480638	0.0480638	0.0480638	0.0480638	0.0480638	0.0480638	0.0480638	0.0480638	0.0480638	0.0480638	0.0480638	0.0480638	0.0480638	0.0480638	0.0480638	0.0480638	0.0480638	0.0480638	0.0480638	0.0480638	0.0480638	0.0480638	0.0480638	0.0480638	0.0480638	0.0480638	0.0480638	0.0480638	0.0480638	0.0480638	0.0480638	0.0480638	0.0480638	0.0480638	0.0480638	0.0480638	0.0480638	0.0480638	0.0480638
Neuron_3	0.0815851	0.0820185	0.0820236	0.0820235	0.0820235	0.0820235	0.0820235	0.0820235	0.0820235	0.0820235	0.0820235	0.0820235	0.0820235	0.0820235	0.0820235	0.0820235	0.0820235	0.0820235	0.0820235	0.0820235	0.0820235	0.0820235	0.0820235	0.0820235	0.0820235	0.0820235	0.0820235	0.0820235	0.0820235	0.0820235	0.0820235	0.0820235	0.0820235	0.0820235	0.0820235	0.0820235	0.0820235	0.0820235	0.0820235	0.0820235	0.0820235	0.0820235	0.0820235	0.0820235	0.0820235	0.0820235	0.0820235	0.0820235	0.0820235
Neuron_4	0.0102921	0.00995507	0.0099661	0.00996612	0.00996612	0.00996612	0.00996612	0.00996612	0.00996612	0.00996612	0.00996612	0.00996612	0.00996612	0.00996612	0.00996612	0.00996612	0.00996612	0.00996612	0.00996612	0.00996612	0.00996612	0.00996612	0.00996612	0.00996612	0.00996612	0.00996612	0.00996612	0.00996612	0.00996612	0.00996612	0.00996612	0.00996612	0.00996612	0.00996612	0.00996612	0.00996612	0.00996612	0.00996612	0.00996612	0.00996612	0.00996612	0.00996612	0.00996612	0.00996612	0.00996612	0.00996612	0.00996612	0.00996612	0.00996612
Neuron_5	0.00866536	0.00866185	0.0086527	0.0086527	0.0086527	0.0086527	0.0086527	0.0086527	0.0086527	0.0086527	0.0086527	0.0086527	0.0086527	0.0086527	0.0086527	0.0086527	0.0086527	0.0086527	0.0086527	0.0086527	0.0086527	0.0086527	0.0086527	0.0086527	0.0086527	0.0086527	0.0086527	0.0086527	0.0086527	0.0086527	0.0086527	0.0086527	0.0086527	0.0086527	0.0086527	0.0086527	0.0086527	0.0086527	0.0086527	0.0086527	0.0086527	0.0086527	0.0086527	0.0086527	0.0086527	0.0086527	0.0086527	0.0086527	0.0086527
Neuron_6	0.0919459	0.092713	0.0927104	0.0927104	0.0927104	0.0927104	0.0927104	0.0927104	0.0927104	0.0927104	0.0927104	0.0927104	0.0927104	0.0927104	0.0927104	0.0927104	0.0927104	0.0927104	0.0927104	0.0927104	0.0927104	0.0927104	0.0927104	0.0927104	0.0927104	0.0927104	0.0927104	0.0927104	0.0927104	0.0927104	0.0927104	0.0927104	0.0927104	0.0927104	0.0927104	0.0927104	0.0927104	0.0927104	0.0927104	0.0927104	0.0927104	0.0927104	0.0927104	0.0927104	0.0927104	0.0927104	0.0927104	0.0927104	0.0927104
Neuron_7	0.00160089	0.00123601	0.00124553	0.00124555	0.00124555	0.00124555	0.00124555	0.00124555	0.00124555	0.00124555	0.00124555	0.00124555	0.00124555	0.00124555	0.00124555	0.00124555	0.00124555	0.00124555	0.00124555	0.00124555	0.00124555	0.00124555	0.00124555	0.00124555	0.00124555	0.00124555	0.00124555	0.00124555	0.00124555	0.00124555	0.00124555	0.00124555	0.00124555	0.00124555	0.00124555	0.00124555	0.00124555	0.00124555	0.00124555	0.00124555	0.00124555	0.00124555	0.00124555	0.00124555	0.00124555	0.00124555	0.00124555	0.00124555	0.00124555
Neuron_8	0.0985497	0.0980257	0.0980289	0.0980289	0.0980289	0.0980289	0.0980289	0.0980289	0.0980289	0.0980289	0.0980289	0.0980289	0.0980289	0.0980289	0.0980289	0.0980289	0.0980289	0.0980289	0.0980289	0.0980289	0.0980289	0.0980289	0.0980289	0.0980289	0.0980289	0.0980289	0.0980289	0.0980289	0.0980289	0.0980289	0.0980289	0.0980289	0.0980289	0.0980289	0.0980289	0.0980289	0.0980289	0.0980289	0.0980289	0.0980289	0.0980289	0.0980289	0.0980289	0.0980289	0.0980289	0.0980289	0.0980289	0.0980289	0.0980289
Neuron_9	0.0875876	0.0865829	0.0865907	0.0865906	0.0865906	0.0865906	0.0865906	0.0865906	0.0865906	0.0865906	0.0865906	0.0865906	0.0865906	0.0865906	0.0865906	0.0865906	0.0865906	0.0865906	0.0865906	0.0865906	0.0865906	0.0865906	0.0865906	0.0865906	0.0865906	0.0865906	0.0865906	0.0865906	0.0865906	0.0865906	0.0865906	0.0865906	0.0865906	0.0865906	0.0865906	0.0865906	0.0865906	0.0865906	0.0865906	0.0865906	0.0865906	0.0865906	0.0865906	0.0865906	0.0865906	0.0865906	0.0865906	0.0865906	0.0865906
Neuron_10	0.0142632	0.0150164	0.0150157	0.0150157	0.0150157	0.0150157	0.0150157	0.0150157	0.0150157	0.0150157	0.0150157	0.0150157	0.0150157	0.0150157	0.0150157	0.0150157	0.0150157	0.0150157	0.0150157	0.0150157	0.0150157	0.0150157	0.0150157	0.0150157	0.0150157	0.0150157	0.0150157	0.0150157	0.0150157	0.0150157	0.0150157	0.0150157	0.0150157	0.0150157	0.0150157	0.0150157	0.0150157	0.0150157	0.0150157	0.0150157	0.0150157	0.0150157	0.0150157	0.0150157	0.0150157	0.0150157	0.0150157	0.0150157	0.0150157
Neuron_11	0.0143852	0.0148792	0.014884	0.014884	0.014884	0.014884	0.014884	0.014884	0.014884	0.014884	0.014884	0.014884	0.014884	0.014884	0.014884	0.014884	0.014884	0.014884	0.014884	0.014884	0.014884	0.014884	0.014884	0.014884	0.014884	0.014884	0.014884	0.014884	0.014884	0.014884	0.014884	0.014884	0.014884	0.014884	0.014884	0.014884	0.014884	0.014884	0.014884	0.014884	0.014884	0.014884	0.014884	0.014884	0.014884	0.014884	0.014884	0.014884	0.014884
Neuron_12	0.00123624	0.00127681	0.0012736	0.00127355	0.00127355	0.00127355	0.00127355	0.00127355	0.00127355	0.00127355	0.00127355	0.00127355	0.00127355	0.00127355	0.00127355	0.00127355	0.00127355	0.00127355	0.00127355	0.00127355	0.00127355	0.00127355	0.00127355	0.00127355	0.00127355	0.00127355	0.00127355	0.00127355	0.00127355	0.00127355	0.00127355	0.00127355	0.00127355	0.00127355	0.00127355	0.00127355	0.00127355	0.00127355	0.00127355	0.00127355	0.00127355	0.00127355	0.00127355	0.00127355	0.00127355	0.00127355	0.00127355	0.00127355	0.00127355
Neuron_13	0.022199	0.0223908	0.0223973	0.0223974	0.0223974	0.0223974	0.0223974	0.0223974	0.0223974	0.0223974	0.0223974	0.0223974	0.0223974	0.0223974	0.0223974	0.0223974	0.0223974	0.0223974	0.0223974	0.0223974	0.0223974	0.0223974	0.0223974	0.0223974	0.0223974	0.0223974	0.0223974	0.0223974	0.0223974	0.0223974	0.0223974	0.0223974	0.0223974	0.0223974	0.0223974	0.0223974	0.0223974	0.0223974	0.0223974	0.0223974	0.0223974	0.0223974	0.0223974	0.0223974	0.0223974	0.0223974	0.0223974	0.0223974	0.0223974
Neuron_14	0.0733032	0.0732083	0.0732085	0.0732085	0.0732085	0.0732085	0.0732085	0.0732085	0.0732085	0.0732085	0.0732085	0.0732085	0.0732085	0.0732085	0.0732085	0.0732085	0.0732085	0.0732085	0.0732085	0.0732085	0.0732085	0.0732085	0.0732085	0.0732085	0.0732085	0.0732085	0.0732085	0.0732085	0.0732085	0.0732085	0.0732085	0.0732085	0.0732085	0.0732085	0.0732085	0.0732085	0.0732085	0.0732085	0.0732085	0.0732085	0.0732085	0.0732085	0.0732085	0.0732085	0.0732085	0.0732085	0.0732085	0.0732085	0.0732085
Neuron_15	0.0135962	0.0136938	0.0136882	0.0136882	0.0136882	0.0136882	0.0136882	0.0136882	0.0136882	0.0136882	0.0136882	0.0136882	0.0136882	0.0136882	0.0136882	0.0136882	0.0136882	0.0136882	0.0136882	0.0136882	0.0136882	0.0136882	0.0136882	0.0136882	0.0136882	0.0136882	0.0136882	0.0136882	0.0136882	0.0136882	0.0136882	0.0136882	0.0136882	0.0136882	0.0136882	0.0136882	0.0136882	0.0136882	0.0136882	0.0136882	0.0136882	0.0136882	0.0136882	0.0136882	0.0136882	0.0136882	0.0136882	0.0136882	0.0136882
Neuron_16	0.0656408	0.0652073	0.0652005	0.0652005	0.0652005	0.0652005	0.0652005	0.0652005	0.0652005	0.0652005	0.0652005	0.0652005	0.0652005	0.0652005	0.0652005	0.0652005	0.0652005	0.0652005	0.0652005	0.0652005	0.0652005	0.0652005	0.0652005	0.0652005	0.0652005	0.0652005	0.0652005	0.0652005	0.0652005	0.0652005	0.0652005	0.0652005	0.0652005	0.0652005	0.0652005	0.0652005	0.0652005	0.0652005	0.0652005	0.0652005	0.0652005	0.0652005	0.0652005	0.0652005	0.0652005	0.0652005	0.0652005	0.0652005	0.0652005
Neuron_17	0.0173881	0.017936	0.0179364	0.0179364	0.0179364	0.0179364	0.0179364	0.0179364	0.0179364	0.0179364	0.0179364	0.0179364	0.0179364	0.0179364	0.0179364	0.0179364	0.0179364	0.0179364	0.0179364	0.0179364	0.0179364	0.0179364	0.0179364	0.0179364	0.0179364	0.0179364	0.0179364	0.0179364	0.0179364	0.0179364	0.0179364	0.0179364	0.0179364	0.0179364	0.0179364	0.0179364	0.0179364	0.0179364	0.0179364	0.0179364	0.0179364	0.0179364	0.0179364	0.0179364	0.0179364	0.0179364	0.0179364	0.0179364	0.0179364
Neuron_18	0.00129625	0.00114399	0.00113793	0.00113795	0.00113795	0.00113795	0.00113795	0.00113795	0.00113795	0.00113795	0.00113795	0.00113795	0.00113795	0.00113795	0.00113795	0.00113795	0.00113795	0.00113795	0.00113795	0.00113795	0.00113795	0.00113795	0.00113795	0.00113795	0.00113795	0.00113795	0.00113795	0.00113795	0.00113795	0.00113795	0.00113795	0.00113795	0.00113795	0.00113795	0.00113795	0.00113795	0.00113795	0.00113795	0.00113795	0.00113795	0.00113795	0.00113795	0.00113795	0.00113795	0.00113795	0.00113795	0.00113795	0.00113795	0.00113795
Neuron_19	0.0181894	0.0190331	0.0190355	0.0190354	0.0190354	0.0190354	0.0190354	0.0190354	0.0190354	0.0190354	0.0190354	0.0190354	0.0190354	0.0190354	0.0190354	0.0190354	0.0190354	0.0190354	0.0190354	0.0190354	0.0190354	0.0190354	0.0190354	0.0190354	0.0190354	0.0190354	0.0190354	0.0190354	0.0190354	0.0190354	0.0190354	0.0190354	0.0190354	0.0190354	0.0190354	0.0190354	0.0190354	0.0190354	0.0190354	0.0190354	0.0190354	0.0190354	0.0190354	0.0190354	0.0190354	0.0190354	0.0190354	0.0190354	0.0190354
Neuron_20	0.049549	0.049448	0.049449	0.049449	0.049449	0.049449	0.049449	0.049449	0.049449	0.049449	0.049449	0.049449	0.049449	0.049449	0.049449	0.049449	0.049449	0.049449	0.049449	0.049449	0.049449	0.049449	0.049449	0.049449	0.049449	0.049449	0.049449	0.049449	0.049449	0.049449	0.049449	0.049449	0.049449	0.049449	0.049449	0.049449	0.049449	0.049449	0.049449	0.049449	0.049449	0.049449	0.049449	0.049449	0.049449	0.049449	0.049449	0.049449	0.049449
Neuron_21	0.0216572	0.0212236	0.0212218	0.0212218	0.0212218	0.0212218	0.0212218	0.0212218	0.0212218	0.0212218	0.0212218	0.0212218	0.0212218	0.0212218	0.0212218	0.0212218	0.0212218	0.0212218	0.0212218	0.0212218	0.0212218	0.0212218	0.0212218	0.0212218	0.0212218	0.0212218	0.0212218	0.0212218	0.0212218	0.0212218	0.0212218	0.0212218	0.0212218	0.0212218	0.0212218	0.0212218	0.0212218	0.0212218	0.0212218	0.0212218	0.0212218	0.0212218	0.0212218	0.0212218	0.0212218	0.0212218	0.0212218	0.0212218	0.0212218
Neuron_22	0.0560837	0.0560444	0.0560451	0.056045	0.056045	0.056045	0.056045	0.056045	0.056045	0.056045	0.056045	0.056045	0.056045	0.056045	0.056045	0.056045	0.056045	0.056045	0.056045	0.056045	0.056045	0.056045	0.056045	0.056045	0.056045	0.056045	0.056045	0.056045	0.056045	0.056045	0.056045	0.056045	0.056045	0.056045	0.056045	0.056045	0.056045	0.056045	0.056045	0.056045	0.056045	0.056045	0.056045	0.056045	0.056045	0.056045	0.056045	0.056045	0.056045
Neuron_23	0.0319521	0.031824	0.0318296	0.0318295	0.0318295	0.0318295	0.0318295	0.0318295	0.0318295	0.0318295	0.0318295	0.0318295	0.0318295	0.0318295	0.0318295	0.0318295	0.0318295	0.0318295	0.0318295	0.0318295	0.0318295	0.0318295	0.0318295	0.0318295	0.0318295	0.0318295	0.0318295	0.0318295	0.0318295	0.0318295	0.0318295	0.0318295	0.0318295	0.0318295	0.0318295	0.0318295	0.0318295	0.0318295	0.0318295	0.0318295	0.0318295	0.0318295	0.0318295	0.0318295	0.0318295	0.0318295	0.0318295	0.0318295	0.0318295
Neuron_24	0.0347906	0.0339923	0.0340088	0.0340087	0.0340087	0.0340087	0.0340087	0.0340087	0.0340087	0.0340087	0.0340087	0.0340087	0.0340087	0.0340087	0.0340087	0.0340087	0.0340087	0.0340087	0.0340087	0.0340087	0.0340087	0.0340087	0.0340087	0.0340087	0.0340087	0.0340087	0.0340087	0.0340087	0.0340087	0.0340087	0.0340087	0.0340087	0.0340087	0.0340087	0.0340087	0.0340087	0.0340087	0.0340087	0.0340087	0.0340087	0.0340087	0.0340087	0.0340087	0.0340087	0.0340087	0.0340087	0.0340087	0.0340087	0.0340087
Neuron_25	0.0427745	0.0417138	0.0417091	0.041709	0.041709	0.041709	0.041709	0.041709	0.041709	0.041709	0.041709	0.041709	0.041709	0.041709	0.041709	0.041709	0.041709	0.041709	0.041709	0.041709	0.041709	0.041709	0.041709	0.041709	0.041709	0.041709	0.041709	0.041709	0.041709	0.041709	0.041709	0.041709	0.041709	0.041709	0.041709	0.041709	0.041709	0.041709	0.041709	0.041709	0.041709	0.041709	0.041709	0.041709	0.041709	0.041709	0.041709	0.041709	0.041709
Neuron_26	0.0798176	0.079535	0.0795393	0.0795392	0.0795392	0.0795392	0.0795392	0.0795392	0.0795392	0.0795392	0.0795392	0.0795392	0.0795392	0.0795392	0.0795392	0.0795392	0.0795392	0.0795392	0.0795392	0.0795392	0.0795392	0.0795392	0.0795392	0.0795392	0.0795392	0.0795392	0.0795392	0.0795392	0.0795392	0.0795392	0.0795392	0.0795392	0.0795392	0.0795392	0.0795392	0.0795392	0.0795392	0.0795392	0.0795392	0.0795392	0.0795392	0.0795392	0.0795392	0.0795392	0.0795392	0.0795392	0.0795392	0.0795392	0.0795392
Neuron_27	0.0719386	0.0718842	0.0718885	0.0718885	0.0718885	0.0718885	0.0718885	0.0718885	0.0718885	0.0718885	0.0718885	0.0718885	0.0718885	0.0718885	0.0718885	0.0718885	0.0718885	0.0718885	0.0718885	0.0718885	0.0718885	0.0718885	0.0718885	0.0718885	0.0718885	0.0718885	0.0718885	0.0718885	0.0718885	0.0718885	0.0718885	0.0718885	0.0718885	0.0718885	0.0718885	0.0718885	0.0718885	0.0718885	0.0718885	0.0718885	0.0718885	0.0718885	0.0718885	0.0718885	0.0718885	0.0718885	0.0718885	0.0718885	0.0718885
Neuron_28	0.0125953	0.0121512	0.0121548	0.0121547	0.0121547	0.0121547	0.0121547	0.0121547	0.0121547	0.0121547	0.0121547	0.0121547	0.0121547	0.0121547	0.0121547	0.0121547	0.0121547	0.0121547	0.0121547	0.0121547	0.0121547	0.0121547	0.0121547	0.0121547	0.0121547	0.0121547	0.0121547	0.0121547	0.0121547	0.0121547	0.0121547	0.0121547	0.0121547	0.0121547	0.0121547	0.0121547	0.0121547	0.0121547	0.0121547	0.0121547	0.0121547	0.0121547	0.0121547	0.0121547	0.0121547	0.0121547	0.0121547	0.0121547	0.0121547
Neuron_29	0.0015836	0.00169194	0.0016907	0.00169085	0.00169085	0.00169085	0.00169085	0.00169085	0.00169085	0.00169085	0.00169085	0.00169085	0.00169085	0.00169085	0.00169085	0.00169085	0.00169085	0.00169085	0.00169085	0.00169085	0.00169085	0.00169085	0.00169085	0.00169085	0.00169085	0.00169085	0.00169085	0.00169085	0.00169085	0.00169085	0.00169085	0.00169085	0.00169085	0.00169085	0.00169085	0.00169085	0.00169085	0.00169085	0.00169085	0.00169085	0.00169085	0.00169085	0.00169085	0.00169085	0.00169085	0.00169085	0.00169085	0.00169085	0.00169085
Neuron_30	0.0714329	0.0711334	0.0711339	0.0711339	0.0711339	0.0711339	0.0711339	0.0711339	0.0711339	0.0711339	0.0711339	0.0711339	0.0711339	0.0711339	0.0711339	0.0711339	0.0711339	0.0711339	0.0711339	0.0711339	0.0711339	0.0711339	0.0711339	0.0711339	0.0711339	0.0711339	0.0711339	0.0711339	0.0711339	0.0711339	0.0711339	0.0711339	0.0711339	0.0711339	0.0711339	0.0711339	0.0711339	0.0711339	0.0711339	0.0711339	0.0711339	0.0711339	0.0711339	0.0711339	0.0711339	0.0711339	0.0711339	0.0711339	0.0711339
Neuron_31	0.00510599	0.00489086	0.00488113	0.00488105	0.00488105	0.00488105	0.00488105	0.00488105	0.00488105	0.00488105	0.00488105	0.00488105	0.00488105	0.00488105	0.00488105	0.00488105	0.00488105	0.00488105	0.00488105	0.00488105	0.00488105	0.00488105	0.00488105	0.00488105	0.00488105	0.00488105	0.00488105	0.00488105	0.00488105	0.00488105	0.00488105	0.00488105	0.00488105	0.00488105	0.00488105	0.00488105	0.00488105	0.00488105	0.00488105	0.00488105	0.00488105	0.00488105	0.00488105	0.00488105	0.00488105	0.00488105	0.00488105	0.00488105	0.00488105
Neuron_32	0.0509578	0.0511121	0.0511142	0.0511142	0.0511142	0.0511142	0.0511142	0.0511142	0.0511142	0.0511142	0.0511142	0.0511142	0.0511142	0.0511142	0.0511142	0.0511142	0.0511142	0.0511142	0.0511142	0.0511142	0.0511142	0.0511142	0.0511142	0.0511142	0.0511142	0.0511142	0.0511142	0.0511142	0.0511142	0.0511142	0.0511142	0.0511142	0.0511142	0.0511142	0.0511142	0.0511142	0.0511142	0.0511142	0.0511142	0.0511142	0.0511142	0.0511142	0.0511142	0.0511142	0.0511142	0.0511142	0.0511142	0.0511142	0.0511142
Neuron_33	0.0384544	0.0393283	0.0393224	0.0393223	0.0393223	0.0393223	0.0393223	0.0393223	0.0393223	0.0393223	0.0393223	0.0393223	0.0393223	0.0393223	0.0393223	0.0393223	0.0393223	0.0393223	0.0393223	0.0393223	0.0393223	0.0393223	0.0393223	0.0393223	0.0393223	0.0393223	0.0393223	0.0393223	0.0393223	0.0393223	0.0393223	0.0393223	0.0393223	0.0393223	0.0393223	0.0393223	0.0393223	0.0393223	0.0393223	0.0393223	0.0393223	0.0393223	0.0393223	0.0393223	0.0393223	0.0393223	0.0393223	0.0393223	0.0393223
Neuron_34	0.0108122	0.0105541	0.0105521	0.0105521	0.0105521	0.0105521	0.0105521	0.0105521	0.0105521	0.0105521	0.0105521	0.0105521	0.0105521	0.0105521	0.0105521	0.0105521	0.0105521	0.0105521	0.0105521	0.0105521	0.0105521	0.0105521	0.0105521	0.0105521	0.0105521	0.0105521	0.0105521	0.0105521	0.0105521	0.0105521	0.0105521	0.0105521	0.0105521	0.0105521	0.0105521	0.0105521	0.0105521	0.0105521	0.0105521	0.0105521	0.0105521	0.0105521	0.0105521	0.0105521	0.0105521	0.0105521	0.0105521	0.0105521	0.0105521
Neuron_35	0.0210204	0.0220395	0.0220385	0.0220385	0.0220385	0.0220385	0.0220385	0.0220385	0.0220385	0.0220385	0.0220385	0.0220385	0.0220385	0.0220385	0.0220385	0.0220385	0.0220385	0.0220385	0.0220385	0.0220385	0.0220385	0.0220385	0.0220385	0.0220385	0.0220385	0.0220385	0.0220385	0.0220385	0.0220385	0.0220385	0.0220385	0.0220385	0.0220385	0.0220385	0.0220385	0.0220385	0.0220385	0.0220385	0.0220385	0.0220385	0.0220385	0.0220385	0.0220385	0.0220385	0.0220385	0.0220385	0.0220385	0.0220385	0.0220385
Neuron_36	0.0185593	0.0173585	0.017364	0.017364	0.017364	0.017364	0.017364	0.017364	0.017364	0.017364	0.017364	0.017364	0.017364	0.017364	0.017364	0.017364	0.017364	0.017364	0.017364	0.017364	0.017364	0.017364	0.017364	0.017364	0.017364	0.017364	0.017364	0.017364	0.017364	0.017364	0.017364	0.017364	0.017364	0.017364	0.017364	0.017364	0.017364	0.017364	0.017364	0.017364	0.017364	0.017364	0.017364	0.017364	0.017364	0.017364	0.017364	0.017364	0.017364
Neuron_37	0.0307699	0.0297332	0.0297348	0.0297348	0.0297348	0.0297348	0.0297348	0.0297348	0.0297348	0.0297348	0.0297348	0.0297348	0.0297348	0.0297348	0.0297348	0.0297348	0.0297348	0.0297348	0.0297348	0.0297348	0.0297348	0.0297348	0.0297348	0.0297348	0.0297348	0.0297348	0.0297348	0.0297348	0.0297348	0.0297348	0.0297348	0.0297348	0.0297348	0.0297348	0.0297348	0.0297348	0.0297348	0.0297348	0.0297348	0.0297348	0.0297348	0.0297348	0.0297348	0.0297348	0.0297348	0.0297348	0.0297348	0.0297348	0.0297348
Neuron_38	0.0403228	0.0404257	0.0404293	0.0404294	0.0404294	0.0404294	0.0404294	0.0404294	0.0404294	0.0404294	0.0404294	0.0404294	0.0404294	0.0404294	0.0404294	0.0404294	0.0404294	0.0404294	0.0404294	0.0404294	0.0404294	0.0404294	0.0404294	0.0404294	0.0404294	0.0404294	0.0404294	0.0404294	0.0404294	0.0404294	0.0404294	0.0404294	0.0404294	0.0404294	0.0404294	0.0404294	0.0404294	0.0404294	0.0404294	0.0404294	0.0404294	0.0404294	0.0404294	0.0404294	0.0404294	0.0404294	0.0404294	0.0404294	0.0404294
Neuron_39	0.0403995	0.0406275	0.0406214	0.0406214	0.0406214	0.0406214	0.0406214	0.0406214	0.0406214	0.0406214	0.0406214	0.0406214	0.0406214	0.0406214	0.0406214	0.0406214	0.0406214	0.0406214	0.0406214	0.0406214	0.0406214	0.0406214	0.0406214	0.0406214	0.0406214	0.0406214	0.0406214	0.0406214	0.0406214	0.0406214	0.0406214	0.0406214	0.0406214	0.0406214	0.0406214	0.0406214	0.0406214	0.0406214	0.0406214	0.0406214	0.0406214	0.0406214	0.0406214	0.0406214	0.0406214	0.0406214	0.0406214	0.0406214	0.0406214
Neuron_40	0.0990043	0.0989273	0.0989268	0.098927	0.098927	0.098927	0.098927	0.098927	0.098927	0.098927	0.098927	0.098927	0.098927	0.098927	0.098927	0.098927	0.098927	0.098927	0.098927	0.098927	0.098927	0.098927	0.098927	0.098927	0.098927	0.098927	0.098927	0.098927	0.098927	0.098927	0.098927	0.098927	0.098927	0.098927	0.098927	0.098927	0.098927	0.098927	0.098927	0.098927	0.098927	0.098927	0.098927	0.098927	0.098927	0.098927	0.098927	0.098927	0.098927
Neuron_41	0.0864815	0.0864079	0.0864054	0.0864054	0.0864054	0.0864054	0.0864054	0.0864054	0.0864054	0.0864054	0.0864054	0.0864054	0.0864054	0.0864054	0.0864054	0.0864054	0.0864054	0.0864054	0.0864054	0.0864054	0.0864054	0.0864054	0.0864054	0.0864054	0.0864054	0.0864054	0.0864054	0.0864054	0.0864054	0.0864054	0.0864054	0.0864054	0.0864054	0.0864054	0.0864054	0.0864054	0.0864054	0.0864054	0.0864054	0.0864054	0.0864054	0.0864054	0.0864054	0.0864054	0.0864054	0.0864054	0.0864054	0.0864054	0.0864054
Neuron_42	0.035733	0.036326	0.0363297	0.0363297	0.0363297	0.0363297	0.0363297	0.0363297	0.0363297	0.0363297	0.0363297	0.0363297	0.0363297	0.0363297	0.0363297	0.0363297	0.0363297	0.0363297	0.0363297	0.0363297	0.0363297	0.0363297	0.0363297	0.0363297	0.0363297	0.0363297	0.0363297	0.0363297	0.0363297	0.0363297	0.0363297	0.0363297	0.0363297	0.0363297	0.0363297	0.0363297	0.0363297	0.0363297	0.0363297	0.0363297	0.0363297	0.0363297	0.0363297	0.0363297	0.0363297	0.0363297	0.0363297	0.0363297	0.0363297
Neuron_43	0.0684644	0.0681896	0.0681881	0.068188	0.068188	0.068188	0.068188	0.068188	0.068188	0.068188	0.068188	0.068188	0.068188	0.068188	0.068188	0.068188	0.068188	0.068188	0.068188	0.068188	0.068188	0.068188	0.068188	0.068188	0.068188	0.068188	0.068188	0.068188	0.068188	0.068188	0.068188	0.068188	0.068188	0.068188	0.068188	0.068188	0.068188	0.068188	0.068188	0.068188	0.068188	0.068188	0.068188	0.068188	0.068188	0.068188	0.068188	0.068188	0.068188
Neuron_44	0.0317191	0.0320271	0.0320272	0.0320272	0.0320272	0.0320272	0.0320272	0.0320272	0.0320272	0.0320272	0.0320272	0.0320272	0.0320272	0.0320272	0.0320272	0.0320272	0.0320272	0.0320272	0.0320272	0.0320272	0.0320272	0.0320272	0.0320272	0.0320272	0.0320272	0.0320272	0.0320272	0.0320272	0.0320272	0.0320272	0.0320272	0.0320272	0.0320272	0.0320272	0.0320272	0.0320272	0.0320272	0.0320272	0.0320272	0.0320272	0.0320272	0.0320272	0.0320272	0.0320272	0.0320272	0.0320272	0.0320272	0.0320272	0.0320272
Neuron_45	0.0446448	0.0444623	0.0444637	0.0444637	0.0444637	0.0444637	0.0444637	0.0444637	0.0444637	0.0444637	0.0444637	0.0444637	0.0444637	0.0444637	0.0444637	0.0444637	0.0444637	0.0444637	0.0444637	0.0444637	0.0444637	0.0444637	0.0444637	0.0444637	0.0444637	0.0444637	0.0444637	0.0444637	0.0444637	0.0444637	0.0444637	0.0444637	0.0444637	0.0444637	0.0444637	0.0444637	0.0444637	0.0444637	0.0444637	0.0444637	0.0444637	0.0444637	0.0444637	0.0444637	0.0444637	0.0444637	0.0444637	0.0444637	0.0444637
Neuron_46	0.0956227	0.0947703	0.094769	0.094769	0.094769	0.094769	0.094769	0.094769	0.094769	0.094769	0.094769	0.094769	0.094769	0.094769	0.094769	0.094769	0.094769	0.094769	0.094769	0.094769	0.094769	0.094769	0.094769	0.094769	0.094769	0.094769	0.094769	0.094769	0.094769	0.094769	0.094769	0.094769	0.094769	0.094769	0.094769	0.094769	0.094769	0.094769	0.094769	0.094769	0.094769	0.094769	0.094769	0.094769	0.094769	0.094769	0.094769	0.094769	0.094769
Neuron_47	0.0964798	0.0958095	0.0958109	0.0958108	0.0958108	0.0958108	0.0958108	0.0958108	0.0958108	0.0958108	0.0958108	0.0958108	0.0958108	0.0958108	0.0958108	0.0958108	0.0958108	0.0958108	0.0958108	0.0958108	0.0958108	0.0958108	0.0958108	0.0958108	0.0958108	0.0958108	0.0958108	0.0958108	0.0958108	0.0958108	0.0958108	0.0958108	0.0958108	0.0958108	0.0958108	0.0958108	0.0958108	0.0958108	0.0958108	0.0958108	0.0958108	0.0958108	0.0958108	0.0958108	0.0958108	0.0958108	0.0958108	0.0958108	0.0958108
Neuron_48	0.0529616	0.0539564	0.0539575	0.0539574	0.0539574	0.0539574	0.0539574	0.0539574	0.0539574	0.0539574	0.0539574	0.0539574	0.0539574	0.0539574	0.0539574	0.0539574	0.0539574	0.0539574	0.0539574	0.0539574	0.0539574	0.0539574	0.0539574	0.0539574	0.0539574	0.0539574	0.0539574	0.0539574	0.0539574	0.0539574	0.0539574	0.0539574	0.0539574	0.0539574	0.0539574	0.0539574	0.0539574	0.0539574	0.0539574	0.0539574	0.0539574	0.0539574	0.0539574	0.0539574	0.0539574	0.0539574	0.0539574	0.0539574	0.0539574
Neuron_49	0.0421823	0.042032	0.0420435	0.0420434	0.0420434	0.0420434	0.0420434	0.0420434	0.0420434	0.0420434	0.0420434	0.0420434	0.0420434	0.0420434	0.0420434	0.0420434	0.0420434	0.0420434	0.0420434	0.0420434	0.0420434	0.0420434	0.0420434	0.0420434	0.0420434	0.0420434	0.0420434	0.0420434	0.0420434	0.0420434	0.0420434	0.0420434	0.0420434	0.0420434	0.0420434	0.0420434	0.0420434	0.0420434	0.0420434	0.0420434	0.0420434	0.0420434	0.0420434	0.0420434	0.0420434	0.0420434	0.0420434	0.0420434	0.0420434
Neuron_50	0.0220209	0.0219454	0.0219389	0.0219389	0.0219389	0.0219389	0.0219389	0.0219389	0.0219389	0.0219389	0.0219389	0.0219389	0.0219389	0.0219389	0.0219389	0.0219389	0.0219389	0.0219389	0.0219389	0.0219389	0.0219389	0.0219389	0.0219389	0.0219389	0.0219389	0.0219389	0.0219389	0.0219389	0.0219389	0.0219389	0.0219389	0.0219389	0.0219389	0.0219389	0.0219389	0.0219389	0.0219389	0.0219389	0.0219389	0.0219389	0.0219389	0.0219389	0.0219389	0.0219389	0.0219389	0.0219389	0.0219389	0.0219389	0.0219389
Neuron_51	0.0277697	0.0270495	0.0270399	0.0270399	0.0270399	0.0270399	0.0270399	0.0270399	0.0270399	0.0270399	0.0270399	0.0270399	0.0270399	0.0270399	0.0270399	0.0270399	0.0270399	0.0270399	0.0270399	0.0270399	0.0270399	0.0270399	0.0270399	0.0270399	0.0270399	0.0270399	0.0270399	0.0270399	0.0270399	0.0270399	0.0270399	0.0270399	0.0270399	0.0270399	0.0270399	0.0270399	0.0270399	0.0270399	0.0270399	0.0270399	0.0270399	0.0270399	0.0270399	0.0270399	0.0270399	0.0270399	0.0270399	0.0270399	0.0270399
Neuron_52	0.0894112	0.0891896	0.0891913	0.0891914	0.0891914	0.0891914	0.0891914	0.0891914	0.0891914	0.0891914	0.0891914	0.0891914	0.0891914	0.0891914	0.0891914	0.0891914	0.0891914	0.0891914	0.0891914	0.0891914	0.0891914	0.0891914	0.0891914	0.0891914	0.0891914	0.0891914	0.0891914	0.0891914	0.0891914	0.0891914	0.0891914	0.0891914	0.0891914	0.0891914	0.0891914	0.0891914	0.0891914	0.0891914	0.0891914	0.0891914	0.0891914	0.0891914	0.0891914	0.0891914	0.0891914	0.0891914	0.0891914	0.0891914	0.0891914
Neuron_53	6.37258e-05	0.000741289	0.000744424	0.000744347	0.000744347	0.000744347	0.000744347	0.000744347	0.000744347	0.000744347	0.000744347	0.000744347	0.000744347	0.000744347	0.000744347	0.000744347	0.000744347	0.000744347	0.000744347	0.000744347	0.000744347	0.000744347	0.000744347	0.000744347	0.000744347	0.000744347	0.000744347	0.000744347	0.000744347	0.000744347	0.000744347	0.000744347	0.000744347	0.000744347	0.000744347	0.000744347	0.000744347	0.000744347	0.000744347	0.000744347	0.000744347	0.000744347	0.000744347	0.000744347	0.000744347	0.000744347	0.000744347	0.000744347	0.000744347
Neuron_54	0.0756976	0.0760541	0.0760529	0.0760529	0.0760529	0.0760529	0.0760529	0.0760529	0.0760529	0.0760529	0.0760529	0.0760529	0.0760529	0.0760529	0.0760529	0.0760529	0.0760529	0.0760529	0.0760529	0.0760529	0.0760529	0.0760529	0.0760529	0.0760529	0.0760529	0.0760529	0.0760529	0.0760529	0.0760529	0.0760529	0.0760529	0.0760529	0.0760529	0.0760529	0.0760529	0.0760529	0.0760529	0.0760529	0.0760529	0.0760529	0.0760529	0.0760529	0.0760529	0.0760529	0.0760529	0.0760529	0.0760529	0.0760529	0.0760529
Neuron_55	0.0432816	0.0435672	0.0435618	0.0435617	0.0435617	0.0435617	0.0435617	0.0435617	0.0435617	0.0435617	0.0435617	0.0435617	0.0435617	0.0435617	0.0435617	0.0435617	0.0435617	0.0435617	0.0435617	0.0435617	0.0435617	0.0435617	0.0435617	0.0435617	0.0435617	0.0435617	0.0435617	0.0435617	0.0435617	0.0435617	0.0435617	0.0435617	0.0435617	0.0435617	0.0435617	0.0435617	0.0435617	0.0435617	0.0435617	0.0435617	0.0435617	0.0435617	0.0435617	0.0435617	0.0435617	0.0435617	0.0435617	0.0435617	0.0435617
Neuron_56	0.0603126	0.0603201	0.0603158	0.0603158	0.0603158	0.0603158	0.0603158	0.0603158	0.0603158	0.0603158	0.0603158	0.0603158	0.0603158	0.0603158	0.0603158	0.0603158	0.0603158	0.0603158	0.0603158	0.0603158	0.0603158	0.0603158	0.0603158	0.0603158	0.0603158	0.0603158	0.0603158	0.0603158	0.0603158	0.0603158	0.0603158	0.0603158	0.0603158	0.0603158	0.0603158	0.0603158	0.0603158	0.0603158	0.0603158	0.0603158	0.0603158	0.0603158	0.0603158	0.0603158	0.0603158	0.0603158	0.0603158	0.0603158	0.0603158
Neuron_57	0.0307593	0.0308058	0.0308103	0.0308102	0.0308102	0.0308102	0.0308102	0.0308102	0.0308102	0.0308102	0.0308102	0.0308102	0.0308102	0.0308102	0.0308102	0.0308102	0.0308102	0.0308102	0.0308102	0.0308102	0.0308102	0.0308102	0.0308102	0.0308102	0.0308102	0.0308102	0.0308102	0.0308102	0.0308102	0.0308102	0.0308102	0.0308102	0.0308102	0.0308102	0.0308102	0.0308102	0.0308102	0.0308102	0.0308102	0.0308102	0.0308102	0.0308102	0.0308102	0.0308102	0.0308102	0.0308102	0.0308102	0.0308102	0.0308102
Neuron_58	0.0201905	0.0202177	0.0202257	0.0202258	0.0202258	0.0202258	0.0202258	0.0202258	0.0202258	0.0202258	0.0202258	0.0202258	0.0202258	0.0202258	0.0202258	0.0202258	0.0202258	0.0202258	0.0202258	0.0202258	0.0202258	0.0202258	0.0202258	0.0202258	0.0202258	0.0202258	0.0202258	0.0202258	0.0202258	0.0202258	0.0202258	0.0202258	0.0202258	0.0202258	0.0202258	0.0202258	0.0202258	0.0202258	0.0202258	0.0202258	0.0202258	0.0202258	0.0202258	0.0202258	0.0202258	0.0202258	0.0202258	0.0202258	0.0202258
Neuron_59	0.0492401	0.049517	0.0495139	0.0495139	0.0495139	0.0495139	0.0495139	0.0495139	0.0495139	0.0495139	0.0495139	0.0495139	0.0495139	0.0495139	0.0495139	0.0495139	0.0495139	0.0495139	0.0495139	0.0495139	0.0495139	0.0495139	0.0495139	0.0495139	0.0495139	0.0495139	0.0495139	0.0495139	0.0495139	0.0495139	0.0495139	0.0495139	0.0495139	0.0495139	0.0495139	0.0495139	0.0495139	0.0495139	0.0495139	0.0495139	0.0495139	0.0495139	0.0495139	0.0495139	0.0495139	0.0495139	0.0495139	0.0495139	0.0495139
Neuron_60	0.0635892	0.0630007	0.0629996	0.0629995	0.0629995	0.0629995	0.0629995	0.0629995	0.0629995	0.0629995	0.0629995	0.0629995	0.0629995	0.0629995	0.0629995	0.0629995	0.0629995	0.0629995	0.0629995	0.0629995	0.0629995	0.0629995	0.0629995	0.0629995	0.0629995	0.0629995	0.0629995	0.0629995	0.0629995	0.0629995	0.0629995	0.0629995	0.0629995	0.0629995	0.0629995	0.0629995	0.0629995	0.0629995	0.0629995	0.0629995	0.0629995	0.0629995	0.0629995	0.0629995	0.0629995	0.0629995	0.0629995	0.0629995	0.0629995
Neuron_61	0.0503419	0.0506904	0.0506869	0.050687	0.0506869	0.0506869	0.0506869	0.0506869	0.0506869	0.0506869	0.0506869	0.0506869	0.0506869	0.0506869	0.0506869	0.0506869	0.0506869	0.0506869	0.0506869	0.0506869	0.0506869	0.0506869	0.0506869	0.0506869	0.0506869	0.0506869	0.0506869	0.0506869	0.0506869	0.0506869	0.0506869	0.0506869	0.0506869	0.0506869	0.0506869	0.0506869	0.0506869	0.0506869	0.0506869	0.0506869	0.0506869	0.0506869	0.0506869	0.0506869	0.0506869	0.0506869	0.0506869	0.0506869	0.0506869
Neuron_62	0.0588181	0.0586336	0.0586264	0.0586264	0.0586264	0.0586264	0.0586264	0.0586264	0.0586264	0.0586264	0.0586264	0.0586264	0.0586264	0.0586264	0.0586264	0.0586264	0.0586264	0.0586264	0.0586264	0.0586264	0.0586264	0.0586264	0.0586264	0.0586264	0.0586264	0.0586264	0.0586264	0.0586264	0.0586264	0.0586264	0.0586264	0.0586264	0.0586264	0.0586264	0.0586264	0.0586264	0.0586264	0.0586264	0.0586264	0.0586264	0.0586264	0.0586264	0.0586264	0.0586264	0.0586264	0.0586264	0.0586264	0.0586264	0.0586264
Neuron_63	0.0581066	0.058551	0.058554	0.058554	0.058554	0.058554	0.058554	0.058554	0.058554	0.058554	0.058554	0.058554	0.058554	0.058554	0.058554	0.058554	0.058554	0.058554	0.058554	0.058554	0.058554	0.058554	0.058554	0.058554	0.058554	0.058554	0.058554	0.058554	0.058554	0.058554	0.058554	0.058554	0.058554	0.058554	0.058554	0.058554	0.058554	0.058554	0.058554	0.058554	0.058554	0.058554	0.058554	0.058554	0.058554	0.058554	0.058554	0.058554	0.058554
Neuron_64	0.0299955	0.030437	0.030436	0.030436	0.030436	0.030436	0.030436	0.030436	0.030436	0.030436	0.030436	0.030436	0.030436	0.030436	0.030436	0.030436	0.030436	0.030436	0.030436	0.030436	0.030436	0.030436	0.030436	0.030436	0.030436	0.030436	0.030436	0.030436	0.030436	0.030436	0.030436	0.030436	0.030436	0.030436	0.030436	0.030436	0.030436	0.030436	0.030436	0.030436	0.030436	0.030436	0.030436	0.030436	0.030436	0.030436	0.030436	0.030436	0.030436
Neuron_65	0.0673571	0.0672111	0.0672061	0.0672061	0.0672061	0.0672061	0.0672061	0.0672061	0.0672061	0.0672061	0.0672061	0.0672061	0.0672061	0.0672061	0.0672061	0.0672061	0.0672061	0.0672061	0.0672061	0.0672061	0.0672061	0.0672061	0.0672061	0.0672061	0.0672061	0.0672061	0.0672061	0.0672061	0.0672061	0.0672061	0.0672061	0.0672061	0.0672061	0.0672061	0.0672061	0.0672061	0.0672061	0.0672061	0.0672061	0.0672061	0.0672061	0.0672061	0.0672061	0.0672061	0.0672061	0.0672061	0.0672061	0.0672061	0.0672061
Neuron_66	0.0352227	0.0347852	0.0347889	0.0347888	0.0347888	0.0347888	0.0347888	0.0347888	0.0347888	0.0347888	0.0347888	0.0347888	0.0347888	0.0347888	0.0347888	0.0347888	0.0347888	0.0347888	0.0347888	0.0347888	0.0347888	0.0347888	0.0347888	0.0347888	0.0347888	0.0347888	0.0347888	0.0347888	0.0347888	0.0347888	0.0347888	0.0347888	0.0347888	0.0347888	0.0347888	0.0347888	0.0347888	0.0347888	0.0347888	0.0347888	0.0347888	0.0347888	0.0347888	0.0347888	0.0347888	0.0347888	0.0347888	0.0347888	0.0347888
Neuron_67	0.0141262	0.0146046	0.0145933	0.0145934	0.0145934	0.0145934	0.0145934	0.0145934	0.0145934	0.0145934	0.0145934	0.0145934	0.0145934	0.0145934	0.0145934	0.0145934	0.0145934	0.0145934	0.0145934	0.0145934	0.0145934	0.0145934	0.0145934	0.0145934	0.0145934	0.0145934	0.0145934	0.0145934	0.0145934	0.0145934	0.0145934	0.0145934	0.0145934	0.0145934	0.0145934	0.0145934	0.0145934	0.0145934	0.0145934	0.0145934	0.0145934	0.0145934	0.0145934	0.0145934	0.0145934	0.0145934	0.0145934	0.0145934	0.0145934
Neuron_68	0.00174552	0.00101399	0.00101596	0.00101598	0.00101598	0.00101598	0.00101598	0.00101598	0.00101598	0.00101598	0.00101598	0.00101598	0.00101598	0.00101598	0.00101598	0.00101598	0.00101598	0.00101598	0.00101598	0.00101598	0.00101598	0.00101598	0.00101598	0.00101598	0.00101598	0.00101598	0.00101598	0.00101598	0.00101598	0.00101598	0.00101598	0.00101598	0.00101598	0.00101598	0.00101598	0.00101598	0.00101598	0.00101598	0.00101598	0.00101598	0.00101598	0.00101598	0.00101598	0.00101598	0.00101598	0.00101598	0.00101598	0.00101598	0.00101598
Neuron_69	0.0387487	0.0390282	0.0390236	0.0390236	0.0390236	0.0390236	0.0390236	0.0390236	0.0390236	0.0390236	0.0390236	0.0390236	0.0390236	0.0390236	0.0390236	0.0390236	0.0390236	0.0390236	0.0390236	0.0390236	0.0390236	0.0390236	0.0390236	0.0390236	0.0390236	0.0390236	0.0390236	0.0390236	0.0390236	0.0390236	0.0390236	0.0390236	0.0390236	0.0390236	0.0390236	0.0390236	0.0390236	0.0390236	0.0390236	0.0390236	0.0390236	0.0390236	0.0390236	0.0390236	0.0390236	0.0390236	0.0390236	0.0390236	0.0390236
Neuron_70	0.0048362	0.00486352	0.00486386	0.00486381	0.00486381	0.00486381	0.00486381	0.00486381	0.00486381	0.00486381	0.00486381	0.00486381	0.00486381	0.00486381	0.00486381	0.00486381	0.00486381	0.00486381	0.00486381	0.00486381	0.00486381	0.00486381	0.00486381	0.00486381	0.00486381	0.00486381	0.00486381	0.00486381	0.00486381	0.00486381	0.00486381	0.00486381	0.00486381	0.00486381	0.00486381	0.00486381	0.00486381	0.00486381	0.00486381	0.00486381	0.00486381	0.00486381	0.00486381	0.00486381	0.00486381	0.00486381	0.00486381	0.00486381	0.00486381
Neuron_71	0.0128733	0.0126779	0.0126809	0.012681	0.012681	0.012681	0.012681	0.012681	0.012681	0.012681	0.012681	0.012681	0.012681	0.012681	0.012681	0.012681	0.012681	0.012681	0.012681	0.012681	0.012681	0.012681	0.012681	0.012681	0.012681	0.012681	0.012681	0.012681	0.012681	0.012681	0.012681	0.012681	0.012681	0.012681	0.012681	0.012681	0.012681	0.012681	0.012681	0.012681	0.012681	0.012681	0.012681	0.012681	0.012681	0.012681	0.012681	0.012681	0.012681
Neuron_72	0.0109811	0.0108546	0.010857	0.010857	0.010857	0.010857	0.010857	0.010857	0.010857	0.010857	0.010857	0.010857	0.010857	0.010857	0.010857	0.010857	0.010857	0.010857	0.010857	0.010857	0.010857	0.010857	0.010857	0.010857	0.010857	0.010857	0.010857	0.010857	0.010857	0.010857	0.010857	0.010857	0.010857	0.010857	0.010857	0.010857	0.010857	0.010857	0.010857	0.010857	0.010857	0.010857	0.010857	0.010857	0.010857	0.010857	0.010857	0.010857	0.010857
Neuron_73	0.0716921	0.0716903	0.0716846	0.0716846	0.0716846	0.0716846	0.0716846	0.0716846	0.0716846	0.0716846	0.0716846	0.0716846	0.0716846	0.0716846	0.0716846	0.0716846	0.0716846	0.0716846	0.0716846	0.0716846	0.0716846	0.0716846	0.0716846	0.0716846	0.0716846	0.0716846	0.0716846	0.0716846	0.0716846	0.0716846	0.0716846	0.0716846	0.0716846	0.0716846	0.0716846	0.0716846	0.0716846	0.0716846	0.0716846	0.0716846	0.0716846	0.0716846	0.0716846	0.0716846	0.0716846	0.0716846	0.0716846	0.0716846	0.0716846
Neuron_74	0.0788572	0.0796102	0.0796151	0.0796152	0.0796152	0.0796152	0.0796152	0.0796152	0.0796152	0.0796152	0.0796152	0.0796152	0.0796152	0.0796152	0.0796152	0.0796152	0.0796152	0.0796152	0.0796152	0.0796152	0.0796152	0.0796152	0.0796152	0.0796152	0.0796152	0.0796152	0.0796152	0.0796152	0.0796152	0.0796152	0.0796152	0.0796152	0.0796152	0.0796152	0.0796152	0.0796152	0.0796152	0.0796152	0.0796152	0.0796152	0.0796152	0.0796152	0.0796152	0.0796152	0.0796152	0.0796152	0.0796152	0.0796152	0.0796152
Neuron_75	0.00397492	0.00363365	0.0036268	0.00362683	0.00362683	0.00362683	0.00362683	0.00362683	0.00362683	0.00362683	0.00362683	0.00362683	0.00362683	0.00362683	0.00362683	0.00362683	0.00362683	0.00362683	0.00362683	0.00362683	0.00362683	0.00362683	0.00362683	0.00362683	0.00362683	0.00362683	0.00362683	0.00362683	0.00362683	0.00362683	0.00362683	0.00362683	0.00362683	0.00362683	0.00362683	0.00362683	0.00362683	0.00362683	0.00362683	0.00362683	0.00362683	0.00362683	0.00362683	0.00362683	0.00362683	0.00362683	0.00362683	0.00362683	0.00362683
Neuron_76	0.0295035	0.0291483	0.0291422	0.0291422	0.0291422	0.0291422	0.0291422	0.0291422	0.0291422	0.0291422	0.0291422	0.0291422	0.0291422	0.0291422	0.0291422	0.0291422	0.0291422	0.0291422	0.0291422	0.0291422	0.0291422	0.0291422	0.0291422	0.0291422	0.0291422	0.0291422	0.0291422	0.0291422	0.0291422	0.0291422	0.0291422	0.0291422	0.0291422	0.0291422	0.0291422	0.0291422	0.0291422	0.0291422	0.0291422	0.0291422	0.0291422	0.0291422	0.0291422	0.0291422	0.0291422	0.0291422	0.0291422	0.0291422	0.0291422
Neuron_77	0.0728832	0.0720954	0.0720978	0.0720977	0.0720977	0.0720977	0.0720977	0.0720977	0.0720977	0.0720977	0.0720977	0.0720977	0.0720977	0.0720977	0.0720977	0.0720977	0.0720977	0.0720977	0.0720977	0.0720977	0.0720977	0.0720977	0.0720977	0.0720977	0.0720977	0.0720977	0.0720977	0.0720977	0.0720977	0.0720977	0.0720977	0.0720977	0.0720977	0.0720977	0.0720977	0.0720977	0.0720977	0.0720977	0.0720977	0.0720977	0.0720977	0.0720977	0.0720977	0.0720977	0.0720977	0.0720977	0.0720977	0.0720977	0.0720977
Neuron_78	0.0456521	0.0453845	0.045376	0.045376	0.045376	0.045376	0.045376	0.045376	0.045376	0.045376	0.045376	0.045376	0.045376	0.045376	0.045376	0.045376	0.045376	0.045376	0.045376	0.045376	0.045376	0.045376	0.045376	0.045376	0.045376	0.045376	0.045376	0.045376	0.045376	0.045376	0.045376	0.045376	0.045376	0.045376	0.045376	0.045376	0.045376	0.045376	0.045376	0.045376	0.045376	0.045376	0.045376	0.045376	0.045376	0.045376	0.045376	0.045376	0.045376
Neuron_79	0.0817407	0.0822089	0.0822002	0.0822002	0.0822002	0.0822002	0.0822002	0.0822002	0.0822002	0.0822002	0.0822002	0.0822002	0.0822002	0.0822002	0.0822002	0.0822002	0.0822002	0.0822002	0.0822002	0.0822002	0.0822002	0.0822002	0.0822002	0.0822002	0.0822002	0.0822002	0.0822002	0.0822002	0.0822002	0.0822002	0.0822002	0.0822002	0.0822002	0.0822002	0.0822002	0.0822002	0.0822002	0.0822002	0.0822002	0.0822002	0.0822002	0.0822002	0.0822002	0.0822002	0.0822002	0.0822002	0.0822002	0.0822002	0.0822002
Neuron_80	0.0389045	0.0386591	0.0386641	0.0386641	0.0386641	0.0386641	0.0386641	0.0386641	0.0386641	0.0386641	0.0386641	0.0386641	0.0386641	0.0386641	0.0386641	0.0386641	0.0386641	0.0386641	0.0386641	0.0386641	0.0386641	0.0386641	0.0386641	0.0386641	0.0386641	0.0386641	0.0386641	0.0386641	0.0386641	0.0386641	0.0386641	0.0386641	0.0386641	0.0386641	0.0386641	0.0386641	0.0386641	0.0386641	0.0386641	0.0386641	0.0386641	0.0386641	0.0386641	0.0386641	0.0386641	0.0386641	0.0386641	0.0386641	0.0386641
Neuron_81	0.0286032	0.0281867	0.0281888	0.0281888	0.0281888	0.0281888	0.0281888	0.0281888	0.0281888	0.0281888	0.0281888	0.0281888	0.0281888	0.0281888	0.0281888	0.0281888	0.0281888	0.0281888	0.0281888	0.0281888	0.0281888	0.0281888	0.0281888	0.0281888	0.0281888	0.0281888	0.0281888	0.0281888	0.0281888	0.0281888	0.0281888	0.0281888	0.0281888	0.0281888	0.0281888	0.0281888	0.0281888	0.0281888	0.0281888	0.0281888	0.0281888	0.0281888	0.0281888	0.0281888	0.0281888	0.0281888	0.0281888	0.0281888	0.0281888
Neuron_82	0.0577124	0.0574655	0.0574635	0.0574636	0.0574636	0.0574636	0.0574636	0.0574636	0.0574636	0.0574636	0.0574636	0.0574636	0.0574636	0.0574636	0.0574636	0.0574636	0.0574636	0.0574636	0.0574636	0.0574636	0.0574636	0.0574636	0.0574636	0.0574636	0.0574636	0.0574636	0.0574636	0.0574636	0.0574636	0.0574636	0.0574636	0.0574636	0.0574636	0.0574636	0.0574636	0.0574636	0.0574636	0.0574636	0.0574636	0.0574636	0.0574636	0.0574636	0.0574636	0.0574636	0.0574636	0.0574636	0.0574636	0.0574636	0.0574636
Neuron_83	0.0185934	0.0186568	0.018657	0.0186569	0.0186569	0.0186569	0.0186569	0.0186569	0.0186569	0.0186569	0.0186569	0.0186569	0.0186569	0.0186569	0.0186569	0.0186569	0.0186569	0.0186569	0.0186569	0.0186569	0.0186569	0.0186569	0.0186569	0.0186569	0.0186569	0.0186569	0.0186569	0.0186569	0.0186569	0.0186569	0.0186569	0.0186569	0.0186569	0.0186569	0.0186569	0.0186569	0.0186569	0.0186569	0.0186569	0.0186569	0.0186569	0.0186569	0.0186569	0.0186569	0.0186569	0.0186569	0.0186569	0.0186569	0.0186569
Neuron_84	0.0203444	0.0205497	0.0205482	0.0205482	0.0205482	0.0205482	0.0205482	0.0205482	0.0205482	0.0205482	0.0205482	0.0205482	0.0205482	0.0205482	0.0205482	0.0205482	0.0205482	0.0205482	0.0205482	0.0205482	0.0205482	0.0205482	0.0205482	0.0205482	0.0205482	0.0205482	0.0205482	0.0205482	0.0205482	0.0205482	0.0205482	0.0205482	0.0205482	0.0205482	0.0205482	0.0205482	0.0205482	0.0205482	0.0205482	0.0205482	0.0205482	0.0205482	0.0205482	0.0205482	0.0205482	0.0205482	0.0205482	0.0205482	0.0205482
Neuron_85	0.00601176	0.00513534	0.005148	0.00514801	0.00514801	0.00514801	0.00514801	0.00514801	0.00514801	0.00514801	0.00514801	0.00514801	0.00514801	0.00514801	0.00514801	0.00514801	0.00514801	0.00514801	0.00514801	0.00514801	0.00514801	0.00514801	0.00514801	0.00514801	0.00514801	0.00514801	0.00514801	0.00514801	0.00514801	0.00514801	0.00514801	0.00514801	0.00514801	0.00514801	0.00514801	0.00514801	0.00514801	0.00514801	0.00514801	0.00514801	0.00514801	0.00514801	0.00514801	0.00514801	0.00514801	0.00514801	0.00514801	0.00514801	0.00514801
Neuron_86	0.0729591	0.0720507	0.0720528	0.0720529	0.0720529	0.0720529	0.0720529	0.0720529	0.0720529	0.0720529	0.0720529	0.0720529	0.0720529	0.0720529	0.0720529	0.0720529	0.0720529	0.0720529	0.0720529	0.0720529	0.0720529	0.0720529	0.0720529	0.0720529	0.0720529	0.0720529	0.0720529	0.0720529	0.0720529	0.0720529	0.0720529	0.0720529	0.0720529	0.0720529	0.0720529	0.0720529	0.0720529	0.0720529	0.0720529	0.0720529	0.0720529	0.0720529	0.0720529	0.0720529	0.0720529	0.0720529	0.0720529	0.0720529	0.0720529
Neuron_87	0.0166679	0.0164261	0.0164241	0.0164242	0.0164242	0.0164242	0.0164242	0.0164242	0.0164242	0.0164242	0.0164242	0.0164242	0.0164242	0.0164242	0.0164242	0.0164242	0.0164242	0.0164242	0.0164242	0.0164242	0.0164242	0.0164242	0.0164242	0.0164242	0.0164242	0.0164242	0.0164242	0.0164242	0.0164242	0.0164242	0.0164242	0.0164242	0.0164242	0.0164242	0.0164242	0.0164242	0.0164242	0.0164242	0.0164242	0.0164242	0.0164242	0.0164242	0.0164242	0.0164242	0.0164242	0.0164242	0.0164242	0.0164242	0.0164242
Neuron_88	0.0268702	0.027617	0.0276125	0.0276125	0.0276125	0.0276125	0.0276125	0.0276125	0.0276125	0.0276125	0.0276125	0.0276125	0.0276125	0.0276125	0.0276125	0.0276125	0.0276125	0.0276125	0.0276125	0.0276125	0.0276125	0.0276125	0.0276125	0.0276125	0.0276125	0.0276125	0.0276125	0.0276125	0.0276125	0.0276125	0.0276125	0.0276125	0.0276125	0.0276125	0.0276125	0.0276125	0.0276125	0.0276125	0.0276125	0.0276125	0.0276125	0.0276125	0.0276125	0.0276125	0.0276125	0.0276125	0.0276125	0.0276125	0.0276125
Neuron_89	0.0949451	0.0947021	0.0947079	0.0947079	0.0947079	0.0947079	0.0947079	0.0947079	0.0947079	0.0947079	0.0947079	0.0947079	0.0947079	0.0947079	0.0947079	0.0947079	0.0947079	0.0947079	0.0947079	0.0947079	0.0947079	0.0947079	0.0947079	0.0947079	0.0947079	0.0947079	0.0947079	0.0947079	0.0947079	0.0947079	0.0947079	0.0947079	0.0947079	0.0947079	0.0947079	0.0947079	0.0947079	0.0947079	0.0947079	0.0947079	0.0947079	0.0947079	0.0947079	0.0947079	0.0947079	0.0947079	0.0947079	0.0947079	0.0947079
Neuron_90	0.0557187	0.0547388	0.0547397	0.0547397	0.0547397	0.0547397	0.0547397	0.0547397	0.0547397	0.0547397	0.0547397	0.0547397	0.0547397	0.0547397	0.0547397	0.0547397	0.0547397	0.0547397	0.0547397	0.0547397	0.0547397	0.0547397	0.0547397	0.0547397	0.0547397	0.0547397	0.0547397	0.0547397	0.0547397	0.0547397	0.0547397	0.0547397	0.0547397	0.0547397	0.0547397	0.0547397	0.0547397	0.0547397	0.0547397	0.0547397	0.0547397	0.0547397	0.0547397	0.0547397	0.0547397	0.0547397	0.0547397	0.0547397	0.0547397
Neuron_91	0.0610444	0.0615076	0.0615078	0.0615077	0.0615077	0.0615077	0.0615077	0.0615077	0.0615077	0.0615077	0.0615077	0.0615077	0.0615077	0.0615077	0.0615077	0.0615077	0.0615077	0.0615077	0.0615077	0.0615077	0.0615077	0.0615077	0.0615077	0.0615077	0.0615077	0.0615077	0.0615077	0.0615077	0.0615077	0.0615077	0.0615077	0.0615077	0.0615077	0.0615077	0.0615077	0.0615077	0.0615077	0.0615077	0.0615077	0.0615077	0.0615077	0.0615077	0.0615077	0.0615077	0.0615077	0.0615077	0.0615077	0.0615077	0.0615077
Neuron_92	0.0772833	0.0778618	0.07787	0.0778699	0.0778699	0.0778699	0.0778699	0.0778699	0.0778699	0.0778699	0.0778699	0.0778699	0.0778699	0.0778699	0.0778699	0.0778699	0.0778699	0.0778699	0.0778699	0.0778699	0.0778699	0.0778699	0.0778699	0.0778699	0.0778699	0.0778699	0.0778699	0.0778699	0.0778699	0.0778699	0.0778699	0.0778699	0.0778699	0.0778699	0.0778699	0.0778699	0.0778699	0.0778699	0.0778699	0.0778699	0.0778699	0.0778699	0.0778699	0.0778699	0.0778699	0.0778699	0.0778699	0.0778699	0.0778699
Neuron_93	0.0532874	0.0535856	0.0535812	0.0535812	0.0535812	0.0535812	0.0535812	0.0535812	0.0535812	0.0535812	0.0535812	0.0535812	0.0535812	0.0535812	0.0535812	0.0535812	0.0535812	0.0535812	0.0535812	0.0535812	0.0535812	0.0535812	0.0535812	0.0535812	0.0535812	0.0535812	0.0535812	0.0535812	0.0535812	0.0535812	0.0535812	0.0535812	0.0535812	0.0535812	0.0535812	0.0535812	0.0535812	0.0535812	0.0535812	0.0535812	0.0535812	0.0535812	0.0535812	0.0535812	0.0535812	0.0535812	0.0535812	0.0535812	0.0535812
Neuron_94	0.0859999	0.0856445	0.0856515	0.0856515	0.0856515	0.0856515	0.0856515	0.0856515	0.0856515	0.0856515	0.0856515	0.0856515	0.0856515	0.0856515	0.0856515	0.0856515	0.0856515	0.0856515	0.0856515	0.0856515	0.0856515	0.0856515	0.0856515	0.0856515	0.0856515	0.0856515	0.0856515	0.0856515	0.0856515	0.0856515	0.0856515	0.0856515	0.0856515	0.0856515	0.0856515	0.0856515	0.0856515	0.0856515	0.0856515	0.0856515	0.0856515	0.0856515	0.0856515	0.0856515	0.0856515	0.0856515	0.0856515	0.0856515	0.0856515
Neuron_95	0.00226997	0.00120198	0.00120436	0.0012043	0.0012043	0.0012043	0.0012043	0.0012043	0.0012043	0.0012043	0.0012043	0.0012043	0.0012043	0.0012043	0.0012043	0.0012043	0.0012043	0.0012043	0.0012043	0.0012043	0.0012043	0.0012043	0.0012043	0.0012043	0.0012043	0.0012043	0.0012043	0.0012043	0.0012043	0.0012043	0.0012043	0.0012043	0.0012043	0.0012043	0.0012043	0.0012043	0.0012043	0.0012043	0.0012043	0.0012043	0.0012043	0.0012043	0.0012043	0.0012043	0.0012043	0.0012043	0.0012043	0.0012043	0.0012043
Neuron_96	0.00127228	0.00141022	0.00141344	0.00141352	0.00141352	0.00141352	0.00141352	0.00141352	0.00141352	0.00141352	0.00141352	0.00141352	0.00141352	0.00141352	0.00141352	0.00141352	0.00141352	0.00141352	0.00141352	0.00141352	0.00141352	0.00141352	0.00141352	0.00141352	0.00141352	0.00141352	0.00141352	0.00141352	0.00141352	0.00141352	0.00141352	0.00141352	0.00141352	0.00141352	0.00141352	0.00141352	0.00141352	0.00141352	0.00141352	0.00141352	0.00141352	0.00141352	0.00141352	0.00141352	0.00141352	0.00141352	0.00141352	0.00141352	0.00141352
Neuron_97	0.0311144	0.0307718	0.0307794	0.0307793	0.0307793	0.0307793	0.0307793	0.0307793	0.0307793	0.0307793	0.0307793	0.0307793	0.0307793	0.0307793	0.0307793	0.0307793	0.0307793	0.0307793	0.0307793	0.0307793	0.0307793	0.0307793	0.0307793	0.0307793	0.0307793	0.0307793	0.0307793	0.0307793	0.0307793	0.0307793	0.0307793	0.0307793	0.0307793	0.0307793	0.0307793	0.0307793	0.0307793	0.0307793	0.0307793	0.0307793	0.0307793	0.0307793	0.0307793	0.0307793	0.0307793	0.0307793	0.0307793	0.0307793	0.0307793
Neuron_98	0.0920069	0.0917433	0.0917522	0.0917521	0.0917521	0.0917521	0.0917521	0.0917521	0.0917521	0.0917521	0.0917521	0.0917521	0.0917521	0.0917521	0.0917521	0.0917521	0.0917521	0.0917521	0.0917521	0.0917521	0.0917521	0.0917521	0.0917521	0.0917521	0.0917521	0.0917521	0.0917521	0.0917521	0.0917521	0.0917521	0.0917521	0.0917521	0.0917521	0.0917521	0.0917521	0.0917521	0.0917521	0.0917521	0.0917521	0.0917521	0.0917521	0.0917521	0.0917521	0.0917521	0.0917521	0.0917521	0.0917521	0.0917521	0.0917521
Neuron_99	0.0890857	0.0886957	0.0886926	0.0886926	0.0886926	0.0886926	0.0886926	0.0886926	0.0886926	0.0886926	0.0886926	0.0886926	0.0886926	0.0886926	0.0886926	0.0886926	0.0886926	0.0886926	0.0886926	0.0886926	0.0886926	0.0886926	0.0886926	0.0886926	0.0886926	0.0886926	0.0886926	0.0886926	0.0886926	0.0886926	0.0886926	0.0886926	0.0886926	0.0886926	0.0886926	0.0886926	0.0886926	0.0886926	0.0886926	0.0886926	0.0886926	0.0886926	0.0886926	0.0886926	0.0886926	0.0886926	0.0886926	0.0886926	0.0886926
Neuron_100	0.0194418	0.019425	0.0194207	0.0194207	0.0194207	0.0194207	0.0194207	0.0194207	0.0194207	0.0194207	0.0194207	0.0194207	0.0194207	0.0194207	0.0194207	0.0194207	0.0194207	0.0194207	0.0194207	0.0194207	0.0194207	0.0194207	0.0194207	0.0194207	0.0194207	0.0194207	0.0194207	0.0194207	0.0194207	0.0194207	0.0194207	0.0194207	0.0194207	0.0194207	0.0194207	0.0194207	0.0194207	0.0194207	0.0194207	0.0194207	0.0194207	0.0194207	0.0194207	0.0194207	0.0194207	0.0194207	0.0194207	0.0194207	0.0194207
Neuron_101	0.0500138	0.0499587	0.0499627	0.0499627	0.0499627	0.0499627	0.0499627	0.0499627	0.0499627	0.0499627	0.0499627	0.0499627	0.0499627	0.0499627	0.0499627	0.0499627	0.0499627	0.0499627	0.0499627	0.0499627	0.0499627	0.0499627	0.0499627	0.0499627	0.0499627	0.0499627	0.0499627	0.0499627	0.0499627	0.0499627	0.0499627	0.0499627	0.0499627	0.0499627	0.0499627	0.0499627	0.0499627	0.0499627	0.0499627	0.0499627	0.0499627	0.0499627	0.0499627	0.0499627	0.0499627	0.0499627	0.0499627	0.0499627	0.0499627
Neuron_102	0.0494087	0.0490599	0.0490522	0.0490522	0.0490522	0.0490522	0.0490522	0.0490522	0.0490522	0.0490522	0.0490522	0.0490522	0.0490522	0.0490522	0.0490522	0.0490522	0.0490522	0.0490522	0.0490522	0.0490522	0.0490522	0.0490522	0.0490522	0.0490522	0.0490522	0.0490522	0.0490522	0.0490522	0.0490522	0.0490522	0.0490522	0.0490522	0.0490522	0.0490522	0.0490522	0.0490522	0.0490522	0.0490522	0.0490522	0.0490522	0.0490522	0.0490522	0.0490522	0.0490522	0.0490522	0.0490522	0.0490522	0.0490522	0.0490522
Neuron_103	0.0748995	0.0731713	0.0731752	0.0731752	0.0731752	0.0731752	0.0731752	0.0731752	0.0731752	0.0731752	0.0731752	0.0731752	0.0731752	0.0731752	0.0731752	0.0731752	0.0731752	0.0731752	0.0731752	0.0731752	0.0731752	0.0731752	0.0731752	0.0731752	0.0731752	0.0731752	0.0731752	0.0731752	0.0731752	0.0731752	0.0731752	0.0731752	0.0731752	0.0731752	0.0731752	0.0731752	0.0731752	0.0731752	0.0731752	0.0731752	0.0731752	0.0731752	0.0731752	0.0731752	0.0731752	0.0731752	0.0731752	0.0731752	0.0731752
Neuron_104	0.0148455	0.0151637	0.0151618	0.0151617	0.0151617	0.0151617	0.0151617	0.0151617	0.0151617	0.0151617	0.0151617	0.0151617	0.0151617	0.0151617	0.0151617	0.0151617	0.0151617	0.0151617	0.0151617	0.0151617	0.0151617	0.0151617	0.0151617	0.0151617	0.0151617	0.0151617	0.0151617	0.0151617	0.0151617	0.0151617	0.0151617	0.0151617	0.0151617	0.0151617	0.0151617	0.0151617	0.0151617	0.0151617	0.0151617	0.0151617	0.0151617	0.0151617	0.0151617	0.0151617	0.0151617	0.0151617	0.0151617	0.0151617	0.0151617
Neuron_105	0.0191203	0.0179297	0.0179246	0.0179246	0.0179246	0.0179246	0.0179246	0.0179246	0.0179246	0.0179246	0.0179246	0.0179246	0.0179246	0.0179246	0.0179246	0.0179246	0.0179246	0.0179246	0.0179246	0.0179246	0.0179246	0.0179246	0.0179246	0.0179246	0.0179246	0.0179246	0.0179246	0.0179246	0.0179246	0.0179246	0.0179246	0.0179246	0.0179246	0.0179246	0.0179246	0.0179246	0.0179246	0.0179246	0.0179246	0.0179246	0.0179246	0.0179246	0.0179246	0.0179246	0.0179246	0.0179246	0.0179246	0.0179246	0.0179246
Neuron_106	0.0473419	0.0471955	0.0471979	0.0471979	0.0471979	0.0471979	0.0471979	0.0471979	0.0471979	0.0471979	0.0471979	0.0471979	0.0471979	0.0471979	0.0471979	0.0471979	0.0471979	0.0471979	0.0471979	0.0471979	0.0471979	0.0471979	0.0471979	0.0471979	0.0471979	0.0471979	0.0471979	0.0471979	0.0471979	0.0471979	0.0471979	0.0471979	0.0471979	0.0471979	0.0471979	0.0471979	0.0471979	0.0471979	0.0471979	0.0471979	0.0471979	0.0471979	0.0471979	0.0471979	0.0471979	0.0471979	0.0471979	0.0471979	0.0471979
Neuron_107	0.0486011	0.0483203	0.0483251	0.0483252	0.0483252	0.0483252	0.0483252	0.0483252	0.0483252	0.0483252	0.0483252	0.0483252	0.0483252	0.0483252	0.0483252	0.0483252	0.0483252	0.0483252	0.0483252	0.0483252	0.0483252	0.0483252	0.0483252	0.0483252	0.0483252	0.0483252	0.0483252	0.0483252	0.0483252	0.0483252	0.0483252	0.0483252	0.0483252	0.0483252	0.0483252	0.0483252	0.0483252	0.0483252	0.0483252	0.0483252	0.0483252	0.0483252	0.0483252	0.0483252	0.0483252	0.0483252	0.0483252	0.0483252	0.0483252
Neuron_108	0.0180706	0.0185195	0.0185256	0.0185256	0.0185256	0.0185256	0.0185256	0.0185256	0.0185256	0.0185256	0.0185256	0.0185256	0.0185256	0.0185256	0.0185256	0.0185256	0.0185256	0.0185256	0.0185256	0.0185256	0.0185256	0.0185256	0.0185256	0.0185256	0.0185256	0.0185256	0.0185256	0.0185256	0.0185256	0.0185256	0.0185256	0.0185256	0.0185256	0.0185256	0.0185256	0.0185256	0.0185256	0.0185256	0.0185256	0.0185256	0.0185256	0.0185256	0.0185256	0.0185256	0.0185256	0.0185256	0.0185256	0.0185256	0.0185256
Neuron_109	0.0128809	0.0134708	0.0134685	0.0134684	0.0134684	0.0134684	0.0134684	0.0134684	0.0134684	0.0134684	0.0134684	0.0134684	0.0134684	0.0134684	0.0134684	0.0134684	0.0134684	0.0134684	0.0134684	0.0134684	0.0134684	0.0134684	0.0134684	0.0134684	0.0134684	0.0134684	0.0134684	0.0134684	0.0134684	0.0134684	0.0134684	0.0134684	0.0134684	0.0134684	0.0134684	0.0134684	0.0134684	0.0134684	0.0134684	0.0134684	0.0134684	0.0134684	0.0134684	0.0134684	0.0134684	0.0134684	0.0134684	0.0134684	0.0134684
Neuron_110	0.0915644	0.0908884	0.0908918	0.0908918	0.0908918	0.0908918	0.0908918	0.0908918	0.0908918	0.0908918	0.0908918	0.0908918	0.0908918	0.0908918	0.0908918	0.0908918	0.0908918	0.0908918	0.0908918	0.0908918	0.0908918	0.0908918	0.0908918	0.0908918	0.0908918	0.0908918	0.0908918	0.0908918	0.0908918	0.0908918	0.0908918	0.0908918	0.0908918	0.0908918	0.0908918	0.0908918	0.0908918	0.0908918	0.0908918	0.0908918	0.0908918	0.0908918	0.0908918	0.0908918	0.0908918	0.0908918	0.0908918	0.0908918	0.0908918
Neuron_111	0.0816044	0.0798821	0.0798918	0.0798918	0.0798918	0.0798918	0.0798918	0.0798918	0.0798918	0.0798918	0.0798918	0.0798918	0.0798918	0.0798918	0.0798918	0.0798918	0.0798918	0.0798918	0.0798918	0.0798918	0.0798918	0.0798918	0.0798918	0.0798918	0.0798918	0.0798918	0.0798918	0.0798918	0.0798918	0.0798918	0.0798918	0.0798918	0.0798918	0.0798918	0.0798918	0.0798918	0.0798918	0.0798918	0.0798918	0.0798918	0.0798918	0.0798918	0.0798918	0.0798918	0.0798918	0.0798918	0.0798918	0.0798918	0.0798918
Neuron_112	0.0752895	0.0753541	0.0753471	0.0753471	0.0753471	0.0753471	0.0753471	0.0753471	0.0753471	0.0753471	0.0753471	0.0753471	0.0753471	0.0753471	0.0753471	0.0753471	0.0753471	0.0753471	0.0753471	0.0753471	0.0753471	0.0753471	0.0753471	0.0753471	0.0753471	0.0753471	0.0753471	0.0753471	0.0753471	0.0753471	0.0753471	0.0753471	0.0753471	0.0753471	0.0753471	0.0753471	0.0753471	0.0753471	0.0753471	0.0753471	0.0753471	0.0753471	0.0753471	0.0753471	0.0753471	0.0753471	0.0753471	0.0753471	0.0753471
Neuron_113	0.0894013	0.0884824	0.0884861	0.0884861	0.0884861	0.0884861	0.0884861	0.0884861	0.0884861	0.0884861	0.0884861	0.0884861	0.0884861	0.0884861	0.0884861	0.0884861	0.0884861	0.0884861	0.0884861	0.0884861	0.0884861	0.0884861	0.0884861	0.0884861	0.0884861	0.0884861	0.0884861	0.0884861	0.0884861	0.0884861	0.0884861	0.0884861	0.0884861	0.0884861	0.0884861	0.0884861	0.0884861	0.0884861	0.0884861	0.0884861	0.0884861	0.0884861	0.0884861	0.0884861	0.0884861	0.0884861	0.0884861	0.0884861	0.0884861
Neuron_114	0.0775409	0.0773372	0.0773414	0.0773413	0.0773413	0.0773413	0.0773413	0.0773413	0.0773413	0.0773413	0.0773413	0.0773413	0.0773413	0.0773413	0.0773413	0.0773413	0.0773413	0.0773413	0.0773413	0.0773413	0.0773413	0.0773413	0.0773413	0.0773413	0.0773413	0.0773413	0.0773413	0.0773413	0.0773413	0.0773413	0.0773413	0.0773413	0.0773413	0.0773413	0.0773413	0.0773413	0.0773413	0.0773413	0.0773413	0.0773413	0.0773413	0.0773413	0.0773413	0.0773413	0.0773413	0.0773413	0.0773413	0.0773413	0.0773413
Neuron_115	0.0602037	0.0609879	0.0609992	0.0609991	0.0609991	0.0609991	0.0609991	0.0609991	0.0609991	0.0609991	0.0609991	0.0609991	0.0609991	0.0609991	0.0609991	0.0609991	0.0609991	0.0609991	0.0609991	0.0609991	0.0609991	0.0609991	0.0609991	0.0609991	0.0609991	0.0609991	0.0609991	0.0609991	0.0609991	0.0609991	0.0609991	0.0609991	0.0609991	0.0609991	0.0609991	0.0609991	0.0609991	0.0609991	0.0609991	0.0609991	0.0609991	0.0609991	0.0609991	0.0609991	0.0609991	0.0609991	0.0609991	0.0609991	0.0609991
Neuron_116	0.065805	0.0664274	0.0664281	0.0664281	0.0664281	0.0664281	0.0664281	0.0664281	0.0664281	0.0664281	0.0664281	0.0664281	0.0664281	0.0664281	0.0664281	0.0664281	0.0664281	0.0664281	0.0664281	0.0664281	0.0664281	0.0664281	0.0664281	0.0664281	0.0664281	0.0664281	0.0664281	0.0664281	0.0664281	0.0664281	0.0664281	0.0664281	0.0664281	0.0664281	0.0664281	0.0664281	0.0664281	0.0664281	0.0664281	0.0664281	0.0664281	0.0664281	0.0664281	0.0664281	0.0664281	0.0664281	0.0664281	0.0664281	0.0664281
Neuron_117	0.0595326	0.0603871	0.0603777	0.0603778	0.0603778	0.0603778	0.0603778	0.0603778	0.0603778	0.0603778	0.0603778	0.0603778	0.0603778	0.0603778	0.0603778	0.0603778	0.0603778	0.0603778	0.0603778	0.0603778	0.0603778	0.0603778	0.0603778	0.0603778	0.0603778	0.0603778	0.0603778	0.0603778	0.0603778	0.0603778	0.0603778	0.0603778	0.0603778	0.0603778	0.0603778	0.0603778	0.0603778	0.0603778	0.0603778	0.0603778	0.0603778	0.0603778	0.0603778	0.0603778	0.0603778	0.0603778	0.0603778	0.0603778	0.0603778
Neuron_118	0.045689	0.0460561	0.0460688	0.0460687	0.0460687	0.0460687	0.0460687	0.0460687	0.0460687	0.0460687	0.0460687	0.0460687	0.0460687	0.0460687	0.0460687	0.0460687	0.0460687	0.0460687	0.0460687	0.0460687	0.0460687	0.0460687	0.0460687	0.0460687	0.0460687	0.0460687	0.0460687	0.0460687	0.0460687	0.0460687	0.0460687	0.0460687	0.0460687	0.0460687	0.0460687	0.0460687	0.0460687	0.0460687	0.0460687	0.0460687	0.0460687	0.0460687	0.0460687	0.0460687	0.0460687	0.0460687	0.0460687	0.0460687	0.0460687
Neuron_119	0.0514847	0.0513986	0.0513957	0.0513957	0.0513957	0.0513957	0.0513957	0.0513957	0.0513957	0.0513957	0.0513957	0.0513957	0.0513957	0.0513957	0.0513957	0.0513957	0.0513957	0.0513957	0.0513957	0.0513957	0.0513957	0.0513957	0.0513957	0.0513957	0.0513957	0.0513957	0.0513957	0.0513957	0.0513957	0.0513957	0.0513957	0.0513957	0.0513957	0.0513957	0.0513957	0.0513957	0.0513957	0.0513957	0.0513957	0.0513957	0.0513957	0.0513957	0.0513957	0.0513957	0.0513957	0.0513957	0.0513957	0.0513957	0.0513957
Neuron_120	0.00634636	0.00586312	0.00586007	0.00586009	0.00586009	0.00586009	0.00586009	0.00586009	0.00586009	0.00586009	0.00586009	0.00586009	0.00586009	0.00586009	0.00586009	0.00586009	0.00586009	0.00586009	0.00586009	0.00586009	0.00586009	0.00586009	0.00586009	0.00586009	0.00586009	0.00586009	0.00586009	0.00586009	0.00586009	0.00586009	0.00586009	0.00586009	0.00586009	0.00586009	0.00586009	0.00586009	0.00586009	0.00586009	0.00586009	0.00586009	0.00586009	0.00586009	0.00586009	0.00586009	0.00586009	0.00586009	0.00586009	0.00586009	0.00586009
Neuron_121	0.0482047	0.0472844	0.047286	0.047286	0.047286	0.047286	0.047286	0.047286	0.047286	0.047286	0.047286	0.047286	0.047286	0.047286	0.047286	0.047286	0.047286	0.047286	0.047286	0.047286	0.047286	0.047286	0.047286	0.047286	0.047286	0.047286	0.047286	0.047286	0.047286	0.047286	0.047286	0.047286	0.047286	0.047286	0.047286	0.047286	0.047286	0.047286	0.047286	0.047286	0.047286	0.047286	0.047286	0.047286	0.047286	0.047286	0.047286	0.047286	0.047286
Neuron_122	0.0157251	0.015714	0.0157165	0.0157165	0.0157165	0.0157165	0.0157165	0.0157165	0.0157165	0.0157165	0.0157165	0.0157165	0.0157165	0.0157165	0.0157165	0.0157165	0.0157165	0.0157165	0.0157165	0.0157165	0.0157165	0.0157165	0.0157165	0.0157165	0.0157165	0.0157165	0.0157165	0.0157165	0.0157165	0.0157165	0.0157165	0.0157165	0.0157165	0.0157165	0.0157165	0.0157165	0.0157165	0.0157165	0.0157165	0.0157165	0.0157165	0.0157165	0.0157165	0.0157165	0.0157165	0.0157165	0.0157165	0.0157165	0.0157165
Neuron_123	0.0463486	0.0466514	0.0466382	0.0466383	0.0466383	0.0466383	0.0466383	0.0466383	0.0466383	0.0466383	0.0466383	0.0466383	0.0466383	0.0466383	0.0466383	0.0466383	0.0466383	0.0466383	0.0466383	0.0466383	0.0466383	0.0466383	0.0466383	0.0466383	0.0466383	0.0466383	0.0466383	0.0466383	0.0466383	0.0466383	0.0466383	0.0466383	0.0466383	0.0466383	0.0466383	0.0466383	0.0466383	0.0466383	0.0466383	0.0466383	0.0466383	0.0466383	0.0466383	0.0466383	0.0466383	0.0466383	0.0466383	0.0466383	0.0466383
Neuron_124	0.0680308	0.067628	0.0676311	0.067631	0.067631	0.067631	0.067631	0.067631	0.067631	0.067631	0.067631	0.067631	0.067631	0.067631	0.067631	0.067631	0.067631	0.067631	0.067631	0.067631	0.067631	0.067631	0.067631	0.067631	0.067631	0.067631	0.067631	0.067631	0.067631	0.067631	0.067631	0.067631	0.067631	0.067631	0.067631	0.067631	0.067631	0.067631	0.067631	0.067631	0.067631	0.067631	0.067631	0.067631	0.067631	0.067631	0.067631	0.067631	0.067631
Neuron_125	0.0160888	0.0172465	0.0172427	0.0172427	0.0172427	0.0172427	0.0172427	0.0172427	0.0172427	0.0172427	0.0172427	0.0172427	0.0172427	0.0172427	0.0172427	0.0172427	0.0172427	0.0172427	0.0172427	0.0172427	0.0172427	0.0172427	0.0172427	0.0172427	0.0172427	0.0172427	0.0172427	0.0172427	0.0172427	0.0172427	0.0172427	0.0172427	0.0172427	0.0172427	0.0172427	0.0172427	0.0172427	0.0172427	0.0172427	0.0172427	0.0172427	0.0172427	0.0172427	0.0172427	0.0172427	0.0172427	0.0172427	0.0172427	0.0172427
Neuron_126	0.0440525	0.043712	0.0437108	0.0437108	0.0437108	0.0437108	0.0437108	0.0437108	0.0437108	0.0437108	0.0437108	0.0437108	0.0437108	0.0437108	0.0437108	0.0437108	0.0437108	0.0437108	0.0437108	0.0437108	0.0437108	0.0437108	0.0437108	0.0437108	0.0437108	0.0437108	0.0437108	0.0437108	0.0437108	0.0437108	0.0437108	0.0437108	0.0437108	0.0437108	0.0437108	0.0437108	0.0437108	0.0437108	0.0437108	0.0437108	0.0437108	0.0437108	0.0437108	0.0437108	0.0437108	0.0437108	0.0437108	0.0437108	0.0437108
Neuron_127	0.0375507	0.0382222	0.0382216	0.0382216	0.0382216	0.0382216	0.0382216	0.0382216	0.0382216	0.0382216	0.0382216	0.0382216	0.0382216	0.0382216	0.0382216	0.0382216	0.0382216	0.0382216	0.0382216	0.0382216	0.0382216	0.0382216	0.0382216	0.0382216	0.0382216	0.0382216	0.0382216	0.0382216	0.0382216	0.0382216	0.0382216	0.0382216	0.0382216	0.0382216	0.0382216	0.0382216	0.0382216	0.0382216	0.0382216	0.0382216	0.0382216	0.0382216	0.0382216	0.0382216	0.0382216	0.0382216	0.0382216	0.0382216	0.0382216
Neuron_128	0.0851463	0.0838128	0.0838217	0.0838218	0.0838218	0.0838218	0.0838218	0.0838218	0.0838218	0.0838218	0.0838218	0.0838218	0.0838218	0.0838218	0.0838218	0.0838218	0.0838218	0.0838218	0.0838218	0.0838218	0.0838218	0.0838218	0.0838218	0.0838218	0.0838218	0.0838218	0.0838218	0.0838218	0.0838218	0.0838218	0.0838218	0.0838218	0.0838218	0.0838218	0.0838218	0.0838218	0.0838218	0.0838218	0.0838218	0.0838218	0.0838218	0.0838218	0.0838218	0.0838218	0.0838218	0.0838218	0.0838218	0.0838218	0.0838218
Neuron_129	0.0901046	0.0904808	0.0904783	0.0904783	0.0904783	0.0904783	0.0904783	0.0904783	0.0904783	0.0904783	0.0904783	0.0904783	0.0904783	0.0904783	0.0904783	0.0904783	0.0904783	0.0904783	0.0904783	0.0904783	0.0904783	0.0904783	0.0904783	0.0904783	0.0904783	0.0904783	0.0904783	0.0904783	0.0904783	0.0904783	0.0904783	0.0904783	0.0904783	0.0904783	0.0904783	0.0904783	0.0904783	0.0904783	0.0904783	0.0904783	0.0904783	0.0904783	0.0904783	0.0904783	0.0904783	0.0904783	0.0904783	0.0904783	0.0904783
Neuron_130	0.0407351	0.0402434	0.0402441	0.040244	0.040244	0.040244	0.040244	0.040244	0.040244	0.040244	0.040244	0.040244	0.040244	0.040244	0.040244	0.040244	0.040244	0.040244	0.040244	0.040244	0.040244	0.040244	0.040244	0.040244	0.040244	0.040244	0.040244	0.040244	0.040244	0.040244	0.040244	0.040244	0.040244	0.040244	0.040244	0.040244	0.040244	0.040244	0.040244	0.040244	0.040244	0.040244	0.040244	0.040244	0.040244	0.040244	0.040244	0.040244	0.040244
Neuron_131	0.0301203	0.0295774	0.0295837	0.0295837	0.0295837	0.0295837	0.0295837	0.0295837	0.0295837	0.0295837	0.0295837	0.0295837	0.0295837	0.0295837	0.0295837	0.0295837	0.0295837	0.0295837	0.0295837	0.0295837	0.0295837	0.0295837	0.0295837	0.0295837	0.0295837	0.0295837	0.0295837	0.0295837	0.0295837	0.0295837	0.0295837	0.0295837	0.0295837	0.0295837	0.0295837	0.0295837	0.0295837	0.0295837	0.0295837	0.0295837	0.0295837	0.0295837	0.0295837	0.0295837	0.0295837	0.0295837	0.0295837	0.0295837	0.0295837
Neuron_132	0.0457179	0.0462235	0.0462264	0.0462264	0.0462264	0.0462264	0.0462264	0.0462264	0.0462264	0.0462264	0.0462264	0.0462264	0.0462264	0.0462264	0.0462264	0.0462264	0.0462264	0.0462264	0.0462264	0.0462264	0.0462264	0.0462264	0.0462264	0.0462264	0.0462264	0.0462264	0.0462264	0.0462264	0.0462264	0.0462264	0.0462264	0.0462264	0.0462264	0.0462264	0.0462264	0.0462264	0.0462264	0.0462264	0.0462264	0.0462264	0.0462264	0.0462264	0.0462264	0.0462264	0.0462264	0.0462264	0.0462264	0.0462264	0.0462264
Neuron_133	0.00870524	0.00945995	0.00945459	0.00945466	0.00945466	0.00945466	0.00945466	0.00945466	0.00945466	0.00945466	0.00945466	0.00945466	0.00945466	0.00945466	0.00945466	0.00945466	0.00945466	0.00945466	0.00945466	0.00945466	0.00945466	0.00945466	0.00945466	0.00945466	0.00945466	0.00945466	0.00945466	0.00945466	0.00945466	0.00945466	0.00945466	0.00945466	0.00945466	0.00945466	0.00945466	0.00945466	0.00945466	0.00945466	0.00945466	0.00945466	0.00945466	0.00945466	0.00945466	0.00945466	0.00945466	0.00945466	0.00945466	0.00945466	0.00945466
Neuron_134	0.0515828	0.0513315	0.05133	0.05133	0.05133	0.05133	0.05133	0.05133	0.05133	0.05133	0.05133	0.05133	0.05133	0.05133	0.05133	0.05133	0.05133	0.05133	0.05133	0.05133	0.05133	0.05133	0.05133	0.05133	0.05133	0.05133	0.05133	0.05133	0.05133	0.05133	0.05133	0.05133	0.05133	0.05133	0.05133	0.05133	0.05133	0.05133	0.05133	0.05133	0.05133	0.05133	0.05133	0.05133	0.05133	0.05133	0.05133	0.05133	0.05133
Neuron_135	0.0764475	0.0768608	0.0768552	0.0768552	0.0768552	0.0768552	0.0768552	0.0768552	0.0768552	0.0768552	0.0768552	0.0768552	0.0768552	0.0768552	0.0768552	0.0768552	0.0768552	0.0768552	0.0768552	0.0768552	0.0768552	0.0768552	0.0768552	0.0768552	0.0768552	0.0768552	0.0768552	0.0768552	0.0768552	0.0768552	0.0768552	0.0768552	0.0768552	0.0768552	0.0768552	0.0768552	0.0768552	0.0768552	0.0768552	0.0768552	0.0768552	0.0768552	0.0768552	0.0768552	0.0768552	0.0768552	0.0768552	0.0768552	0.0768552
Neuron_136	0.0579843	0.0583157	0.0583067	0.0583068	0.0583068	0.0583068	0.0583068	0.0583068	0.0583068	0.0583068	0.0583068	0.0583068	0.0583068	0.0583068	0.0583068	0.0583068	0.0583068	0.0583068	0.0583068	0.0583068	0.0583068	0.0583068	0.0583068	0.0583068	0.0583068	0.0583068	0.0583068	0.0583068	0.0583068	0.0583068	0.0583068	0.0583068	0.0583068	0.0583068	0.0583068	0.0583068	0.0583068	0.0583068	0.0583068	0.0583068	0.0583068	0.0583068	0.0583068	0.0583068	0.0583068	0.0583068	0.0583068	0.0583068	0.0583068
Neuron_137	0.0547781	0.0536468	0.053651	0.053651	0.053651	0.053651	0.053651	0.053651	0.053651	0.053651	0.053651	0.053651	0.053651	0.053651	0.053651	0.053651	0.053651	0.053651	0.053651	0.053651	0.053651	0.053651	0.053651	0.053651	0.053651	0.053651	0.053651	0.053651	0.053651	0.053651	0.053651	0.053651	0.053651	0.053651	0.053651	0.053651	0.053651	0.053651	0.053651	0.053651	0.053651	0.053651	0.053651	0.053651	0.053651	0.053651	0.053651	0.053651	0.053651
Neuron_138	0.0524482	0.0528401	0.0528407	0.0528407	0.0528407	0.0528407	0.0528407	0.0528407	0.0528407	0.0528407	0.0528407	0.0528407	0.0528407	0.0528407	0.0528407	0.0528407	0.0528407	0.0528407	0.0528407	0.0528407	0.0528407	0.0528407	0.0528407	0.0528407	0.0528407	0.0528407	0.0528407	0.0528407	0.0528407	0.0528407	0.0528407	0.0528407	0.0528407	0.0528407	0.0528407	0.0528407	0.0528407	0.0528407	0.0528407	0.0528407	0.0528407	0.0528407	0.0528407	0.0528407	0.0528407	0.0528407	0.0528407	0.0528407	0.0528407
Neuron_139	0.0426784	0.0421459	0.0421467	0.0421466	0.0421466	0.0421466	0.0421466	0.0421466	0.0421466	0.0421466	0.0421466	0.0421466	0.0421466	0.0421466	0.0421466	0.0421466	0.0421466	0.0421466	0.0421466	0.0421466	0.0421466	0.0421466	0.0421466	0.0421466	0.0421466	0.0421466	0.0421466	0.0421466	0.0421466	0.0421466	0.0421466	0.0421466	0.0421466	0.0421466	0.0421466	0.0421466	0.0421466	0.0421466	0.0421466	0.0421466	0.0421466	0.0421466	0.0421466	0.0421466	0.0421466	0.0421466	0.0421466	0.0421466	0.0421466
Neuron_140	0.0946369	0.0931305	0.0931327	0.0931327	0.0931327	0.0931327	0.0931327	0.0931327	0.0931327	0.0931327	0.0931327	0.0931327	0.0931327	0.0931327	0.0931327	0.0931327	0.0931327	0.0931327	0.0931327	0.0931327	0.0931327	0.0931327	0.0931327	0.0931327	0.0931327	0.0931327	0.0931327	0.0931327	0.0931327	0.0931327	0.0931327	0.0931327	0.0931327	0.0931327	0.0931327	0.0931327	0.0931327	0.0931327	0.0931327	0.0931327	0.0931327	0.0931327	0.0931327	0.0931327	0.0931327	0.0931327	0.0931327	0.0931327	0.0931327
Neuron_141	0.0321285	0.0310766	0.0310777	0.0310777	0.0310777	0.0310777	0.0310777	0.0310777	0.0310777	0.0310777	0.0310777	0.0310777	0.0310777	0.0310777	0.0310777	0.0310777	0.0310777	0.0310777	0.0310777	0.0310777	0.0310777	0.0310777	0.0310777	0.0310777	0.0310777	0.0310777	0.0310777	0.0310777	0.0310777	0.0310777	0.0310777	0.0310777	0.0310777	0.0310777	0.0310777	0.0310777	0.0310777	0.0310777	0.0310777	0.0310777	0.0310777	0.0310777	0.0310777	0.0310777	0.0310777	0.0310777	0.0310777	0.0310777	0.0310777
Neuron_142	0.0360136	0.0354062	0.035406	0.035406	0.035406	0.035406	0.035406	0.035406	0.035406	0.035406	0.035406	0.035406	0.035406	0.035406	0.035406	0.035406	0.035406	0.035406	0.035406	0.035406	0.035406	0.035406	0.035406	0.035406	0.035406	0.035406	0.035406	0.035406	0.035406	0.035406	0.035406	0.035406	0.035406	0.035406	0.035406	0.035406	0.035406	0.035406	0.035406	0.035406	0.035406	0.035406	0.035406	0.035406	0.035406	0.035406	0.035406	0.035406	0.035406
Neuron_143	0.0186202	0.0180574	0.0180656	0.0180656	0.0180656	0.0180656	0.0180656	0.0180656	0.0180656	0.0180656	0.0180656	0.0180656	0.0180656	0.0180656	0.0180656	0.0180656	0.0180656	0.0180656	0.0180656	0.0180656	0.0180656	0.0180656	0.0180656	0.0180656	0.0180656	0.0180656	0.0180656	0.0180656	0.0180656	0.0180656	0.0180656	0.0180656	0.0180656	0.0180656	0.0180656	0.0180656	0.0180656	0.0180656	0.0180656	0.0180656	0.0180656	0.0180656	0.0180656	0.0180656	0.0180656	0.0180656	0.0180656	0.0180656	0.0180656
Neuron_144	0.0701394	0.0701638	0.0701795	0.0701795	0.0701795	0.0701795	0.0701795	0.0701795	0.0701795	0.0701795	0.0701795	0.0701795	0.0701795	0.0701795	0.0701795	0.0701795	0.0701795	0.0701795	0.0701795	0.0701795	0.0701795	0.0701795	0.0701795	0.0701795	0.0701795	0.0701795	0.0701795	0.0701795	0.0701795	0.0701795	0.0701795	0.0701795	0.0701795	0.0701795	0.0701795	0.0701795	0.0701795	0.0701795	0.0701795	0.0701795	0.0701795	0.0701795	0.0701795	0.0701795	0.0701795	0.0701795	0.0701795	0.0701795	0.0701795
Neuron_145	0.062178	0.0613863	0.0613878	0.0613879	0.0613879	0.0613879	0.0613879	0.0613879	0.0613879	0.0613879	0.0613879	0.0613879	0.0613879	0.0613879	0.0613879	0.0613879	0.0613879	0.0613879	0.0613879	0.0613879	0.0613879	0.0613879	0.0613879	0.0613879	0.0613879	0.0613879	0.0613879	0.0613879	0.0613879	0.0613879	0.0613879	0.0613879	0.0613879	0.0613879	0.0613879	0.0613879	0.0613879	0.0613879	0.0613879	0.0613879	0.0613879	0.0613879	0.0613879	0.0613879	0.0613879	0.0613879	0.0613879	0.0613879	0.0613879
Neuron_146	0.00996036	0.0103539	0.0103428	0.0103429	0.0103429	0.0103429	0.0103429	0.0103429	0.0103429	0.0103429	0.0103429	0.0103429	0.0103429	0.0103429	0.0103429	0.0103429	0.0103429	0.0103429	0.0103429	0.0103429	0.0103429	0.0103429	0.0103429	0.0103429	0.0103429	0.0103429	0.0103429	0.0103429	0.0103429	0.0103429	0.0103429	0.0103429	0.0103429	0.0103429	0.0103429	0.0103429	0.0103429	0.0103429	0.0103429	0.0103429	0.0103429	0.0103429	0.0103429	0.0103429	0.0103429	0.0103429	0.0103429	0.0103429	0.0103429
Neuron_147	0.0402487	0.0394927	0.0394984	0.0394983	0.0394983	0.0394983	0.0394983	0.0394983	0.0394983	0.0394983	0.0394983	0.0394983	0.0394983	0.0394983	0.0394983	0.0394983	0.0394983	0.0394983	0.0394983	0.0394983	0.0394983	0.0394983	0.0394983	0.0394983	0.0394983	0.0394983	0.0394983	0.0394983	0.0394983	0.0394983	0.0394983	0.0394983	0.0394983	0.0394983	0.0394983	0.0394983	0.0394983	0.0394983	0.0394983	0.0394983	0.0394983	0.0394983	0.0394983	0.0394983	0.0394983	0.0394983	0.0394983	0.0394983	0.0394983
Neuron_148	0.0147889	0.0149901	0.0149929	0.0149929	0.0149929	0.0149929	0.0149929	0.0149929	0.0149929	0.0149929	0.0149929	0.0149929	0.0149929	0.0149929	0.0149929	0.0149929	0.0149929	0.0149929	0.0149929	0.0149929	0.0149929	0.0149929	0.0149929	0.0149929	0.0149929	0.0149929	0.0149929	0.0149929	0.0149929	0.0149929	0.0149929	0.0149929	0.0149929	0.0149929	0.0149929	0.0149929	0.0149929	0.0149929	0.0149929	0.0149929	0.0149929	0.0149929	0.0149929	0.0149929	0.0149929	0.0149929	0.0149929	0.0149929	0.0149929
Neuron_149	0.083431	0.0835474	0.0835572	0.0835571	0.0835571	0.0835571	0.0835571	0.0835571	0.0835571	0.0835571	0.0835571	0.0835571	0.0835571	0.0835571	0.0835571	0.0835571	0.0835571	0.0835571	0.0835571	0.0835571	0.0835571	0.0835571	0.0835571	0.0835571	0.0835571	0.0835571	0.0835571	0.0835571	0.0835571	0.0835571	0.0835571	0.0835571	0.0835571	0.0835571	0.0835571	0.0835571	0.0835571	0.0835571	0.0835571	0.0835571	0.0835571	0.0835571	0.0835571	0.0835571	0.0835571	0.0835571	0.0835571	0.0835571	0.0835571
Neuron_150	0.0368493	0.0366896	0.036693	0.036693	0.036693	0.036693	0.036693	0.036693	0.036693	0.036693	0.036693	0.036693	0.036693	0.036693	0.036693	0.036693	0.036693	0.036693	0.036693	0.036693	0.036693	0.036693	0.036693	0.036693	0.036693	0.036693	0.036693	0.036693	0.036693	0.036693	0.036693	0.036693	0.036693	0.036693	0.036693	0.036693	0.036693	0.036693	0.036693	0.036693	0.036693	0.036693	0.036693	0.036693	0.036693	0.036693	0.036693	0.036693	0.036693
Neuron_151	0.0986925	0.0982051	0.0982054	0.0982054	0.0982054	0.0982054	0.0982054	0.0982054	0.0982054	0.0982054	0.0982054	0.0982054	0.0982054	0.0982054	0.0982054	0.0982054	0.0982054	0.0982054	0.0982054	0.0982054	0.0982054	0.0982054	0.0982054	0.0982054	0.0982054	0.0982054	0.0982054	0.0982054	0.0982054	0.0982054	0.0982054	0.0982054	0.0982054	0.0982054	0.0982054	0.0982054	0.0982054	0.0982054	0.0982054	0.0982054	0.0982054	0.0982054	0.0982054	0.0982054	0.0982054	0.0982054	0.0982054	0.0982054	0.0982054
Neuron_152	0.0242705	0.024659	0.024663	0.0246631	0.0246631	0.0246631	0.0246631	0.0246631	0.0246631	0.0246631	0.0246631	0.0246631	0.0246631	0.0246631	0.0246631	0.0246631	0.0246631	0.0246631	0.0246631	0.0246631	0.0246631	0.0246631	0.0246631	0.0246631	0.0246631	0.0246631	0.0246631	0.0246631	0.0246631	0.0246631	0.0246631	0.0246631	0.0246631	0.0246631	0.0246631	0.0246631	0.0246631	0.0246631	0.0246631	0.0246631	0.0246631	0.0246631	0.0246631	0.0246631	0.0246631	0.0246631	0.0246631	0.0246631	0.0246631
Neuron_153	0.0922754	0.0924639	0.0924647	0.0924648	0.0924648	0.0924648	0.0924648	0.0924648	0.0924648	0.0924648	0.0924648	0.0924648	0.0924648	0.0924648	0.0924648	0.0924648	0.0924648	0.0924648	0.0924648	0.0924648	0.0924648	0.0924648	0.0924648	0.0924648	0.0924648	0.0924648	0.0924648	0.0924648	0.0924648	0.0924648	0.0924648	0.0924648	0.0924648	0.0924648	0.0924648	0.0924648	0.0924648	0.0924648	0.0924648	0.0924648	0.0924648	0.0924648	0.0924648	0.0924648	0.0924648	0.0924648	0.0924648	0.0924648	0.0924648
Neuron_154	0.0971987	0.0970153	0.0970172	0.0970172	0.0970172	0.0970172	0.0970172	0.0970172	0.0970172	0.0970172	0.0970172	0.0970172	0.0970172	0.0970172	0.0970172	0.0970172	0.0970172	0.0970172	0.0970172	0.0970172	0.0970172	0.0970172	0.0970172	0.0970172	0.0970172	0.0970172	0.0970172	0.0970172	0.0970172	0.0970172	0.0970172	0.0970172	0.0970172	0.0970172	0.0970172	0.0970172	0.0970172	0.0970172	0.0970172	0.0970172	0.0970172	0.0970172	0.0970172	0.0970172	0.0970172	0.0970172	0.0970172	0.0970172	0.0970172
Neuron_155	0.0241802	0.0240752	0.0240724	0.0240724	0.0240724	0.0240724	0.0240724	0.0240724	0.0240724	0.0240724	0.0240724	0.0240724	0.0240724	0.0240724	0.0240724	0.0240724	0.0240724	0.0240724	0.0240724	0.0240724	0.0240724	0.0240724	0.0240724	0.0240724	0.0240724	0.0240724	0.0240724	0.0240724	0.0240724	0.0240724	0.0240724	0.0240724	0.0240724	0.0240724	0.0240724	0.0240724	0.0240724	0.0240724	0.0240724	0.0240724	0.0240724	0.0240724	0.0240724	0.0240724	0.0240724	0.0240724	0.0240724	0.0240724	0.0240724
Neuron_156	0.0185148	0.0185692	0.0185633	0.0185634	0.0185634	0.0185634	0.0185634	0.0185634	0.0185634	0.0185634	0.0185634	0.0185634	0.0185634	0.0185634	0.0185634	0.0185634	0.0185634	0.0185634	0.0185634	0.0185634	0.0185634	0.0185634	0.0185634	0.0185634	0.0185634	0.0185634	0.0185634	0.0185634	0.0185634	0.0185634	0.0185634	0.0185634	0.0185634	0.0185634	0.0185634	0.0185634	0.0185634	0.0185634	0.0185634	0.0185634	0.0185634	0.0185634	0.0185634	0.0185634	0.0185634	0.0185634	0.0185634	0.0185634	0.0185634
Neuron_157	0.0174569	0.0169831	0.0169816	0.0169817	0.0169817	0.0169817	0.0169817	0.0169817	0.0169817	0.0169817	0.0169817	0.0169817	0.0169817	0.0169817	0.0169817	0.0169817	0.0169817	0.0169817	0.0169817	0.0169817	0.0169817	0.0169817	0.0169817	0.0169817	0.0169817	0.0169817	0.0169817	0.0169817	0.0169817	0.0169817	0.0169817	0.0169817	0.0169817	0.0169817	0.0169817	0.0169817	0.0169817	0.0169817	0.0169817	0.0169817	0.0169817	0.0169817	0.0169817	0.0169817	0.0169817	0.0169817	0.0169817	0.0169817	0.0169817
Neuron_158	0.0940365	0.0938007	0.0937987	0.0937988	0.0937988	0.0937988	0.0937988	0.0937988	0.0937988	0.0937988	0.0937988	0.0937988	0.0937988	0.0937988	0.0937988	0.0937988	0.0937988	0.0937988	0.0937988	0.0937988	0.0937988	0.0937988	0.0937988	0.0937988	0.0937988	0.0937988	0.0937988	0.0937988	0.0937988	0.0937988	0.0937988	0.0937988	0.0937988	0.0937988	0.0937988	0.0937988	0.0937988	0.0937988	0.0937988	0.0937988	0.0937988	0.0937988	0.0937988	0.0937988	0.0937988	0.0937988	0.0937988	0.0937988	0.0937988
Neuron_159	0.0669044	0.0670513	0.067042	0.067042	0.067042	0.067042	0.067042	0.067042	0.067042	0.067042	0.067042	0.067042	0.067042	0.067042	0.067042	0.067042	0.067042	0.067042	0.067042	0.067042	0.067042	0.067042	0.067042	0.067042	0.067042	0.067042	0.067042	0.067042	0.067042	0.067042	0.067042	0.067042	0.067042	0.067042	0.067042	0.067042	0.067042	0.067042	0.067042	0.067042	0.067042	0.067042	0.067042	0.067042	0.067042	0.067042	0.067042	0.067042	0.067042
Neuron_160	0.000675303	0.000296274	0.00029421	0.000294155	0.000294154	0.000294154	0.000294154	0.000294154	0.000294154	0.000294154	0.000294154	0.000294154	0.000294154	0.000294154	0.000294154	0.000294154	0.000294154	0.000294154	0.000294154	0.000294154	0.000294154	0.000294154	0.000294154	0.000294154	0.000294154	0.000294154	0.000294154	0.000294154	0.000294154	0.000294154	0.000294154	0.000294154	0.000294154	0.000294154	0.000294154	0.000294154	0.000294154	0.000294154	0.000294154	0.000294154	0.000294154	0.000294154	0.000294154	0.000294154	0.000294154	0.000294154	0.000294154	0.000294154	0.000294154
Neuron_161	0.0905402	0.0904991	0.090496	0.090496	0.090496	0.090496	0.090496	0.090496	0.090496	0.090496	0.090496	0.090496	0.090496	0.090496	0.090496	0.090496	0.090496	0.090496	0.090496	0.090496	0.090496	0.090496	0.090496	0.090496	0.090496	0.090496	0.090496	0.090496	0.090496	0.090496	0.090496	0.090496	0.090496	0.090496	0.090496	0.090496	0.090496	0.090496	0.090496	0.090496	0.090496	0.090496	0.090496	0.090496	0.090496	0.090496	0.090496	0.090496	0.090496
Neuron_162	0.0297894	0.0293661	0.0293688	0.0293688	0.0293688	0.0293688	0.0293688	0.0293688	0.0293688	0.0293688	0.0293688	0.0293688	0.0293688	0.0293688	0.0293688	0.0293688	0.0293688	0.0293688	0.0293688	0.0293688	0.0293688	0.0293688	0.0293688	0.0293688	0.0293688	0.0293688	0.0293688	0.0293688	0.0293688	0.0293688	0.0293688	0.0293688	0.0293688	0.0293688	0.0293688	0.0293688	0.0293688	0.0293688	0.0293688	0.0293688	0.0293688	0.0293688	0.0293688	0.0293688	0.0293688	0.0293688	0.0293688	0.0293688	0.0293688
Neuron_163	0.0663756	0.0651463	0.0651443	0.0651444	0.0651444	0.0651444	0.0651444	0.0651444	0.0651444	0.0651444	0.0651444	0.0651444	0.0651444	0.0651444	0.0651444	0.0651444	0.0651444	0.0651444	0.0651444	0.0651444	0.0651444	0.0651444	0.0651444	0.0651444	0.0651444	0.0651444	0.0651444	0.0651444	0.0651444	0.0651444	0.0651444	0.0651444	0.0651444	0.0651444	0.0651444	0.0651444	0.0651444	0.0651444	0.0651444	0.0651444	0.0651444	0.0651444	0.0651444	0.0651444	0.0651444	0.0651444	0.0651444	0.0651444	0.0651444
Neuron_164	0.088161	0.0880113	0.0880019	0.088002	0.088002	0.088002	0.088002	0.088002	0.088002	0.088002	0.088002	0.088002	0.088002	0.088002	0.088002	0.088002	0.088002	0.088002	0.088002	0.088002	0.088002	0.088002	0.088002	0.088002	0.088002	0.088002	0.088002	0.088002	0.088002	0.088002	0.088002	0.088002	0.088002	0.088002	0.088002	0.088002	0.088002	0.088002	0.088002	0.088002	0.088002	0.088002	0.088002	0.088002	0.088002	0.088002	0.088002	0.088002	0.088002
Neuron_165	0.0790417	0.0790793	0.079083	0.079083	0.079083	0.079083	0.079083	0.079083	0.079083	0.079083	0.079083	0.079083	0.079083	0.079083	0.079083	0.079083	0.079083	0.079083	0.079083	0.079083	0.079083	0.079083	0.079083	0.079083	0.079083	0.079083	0.079083	0.079083	0.079083	0.079083	0.079083	0.079083	0.079083	0.079083	0.079083	0.079083	0.079083	0.079083	0.079083	0.079083	0.079083	0.079083	0.079083	0.079083	0.079083	0.079083	0.079083	0.079083	0.079083
Neuron_166	0.018674	0.0191805	0.0191707	0.0191707	0.0191707	0.0191707	0.0191707	0.0191707	0.0191707	0.0191707	0.0191707	0.0191707	0.0191707	0.0191707	0.0191707	0.0191707	0.0191707	0.0191707	0.0191707	0.0191707	0.0191707	0.0191707	0.0191707	0.0191707	0.0191707	0.0191707	0.0191707	0.0191707	0.0191707	0.0191707	0.0191707	0.0191707	0.0191707	0.0191707	0.0191707	0.0191707	0.0191707	0.0191707	0.0191707	0.0191707	0.0191707	0.0191707	0.0191707	0.0191707	0.0191707	0.0191707	0.0191707	0.0191707	0.0191707
Neuron_167	0.0748543	0.0740574	0.0740624	0.0740624	0.0740624	0.0740624	0.0740624	0.0740624	0.0740624	0.0740624	0.0740624	0.0740624	0.0740624	0.0740624	0.0740624	0.0740624	0.0740624	0.0740624	0.0740624	0.0740624	0.0740624	0.0740624	0.0740624	0.0740624	0.0740624	0.0740624	0.0740624	0.0740624	0.0740624	0.0740624	0.0740624	0.0740624	0.0740624	0.0740624	0.0740624	0.0740624	0.0740624	0.0740624	0.0740624	0.0740624	0.0740624	0.0740624	0.0740624	0.0740624	0.0740624	0.0740624	0.0740624	0.0740624	0.0740624
Neuron_168	0.0323185	0.0317814	0.0317915	0.0317916	0.0317916	0.0317916	0.0317916	0.0317916	0.0317916	0.0317916	0.0317916	0.0317916	0.0317916	0.0317916	0.0317916	0.0317916	0.0317916	0.0317916	0.0317916	0.0317916	0.0317916	0.0317916	0.0317916	0.0317916	0.0317916	0.0317916	0.0317916	0.0317916	0.0317916	0.0317916	0.0317916	0.0317916	0.0317916	0.0317916	0.0317916	0.0317916	0.0317916	0.0317916	0.0317916	0.0317916	0.0317916	0.0317916	0.0317916	0.0317916	0.0317916	0.0317916	0.0317916	0.0317916	0.0317916
Neuron_169	0.0944331	0.0944342	0.0944303	0.0944303	0.0944303	0.0944303	0.0944303	0.0944303	0.0944303	0.0944303	0.0944303	0.0944303	0.0944303	0.0944303	0.0944303	0.0944303	0.0944303	0.0944303	0.0944303	0.0944303	0.0944303	0.0944303	0.0944303	0.0944303	0.0944303	0.0944303	0.0944303	0.0944303	0.0944303	0.0944303	0.0944303	0.0944303	0.0944303	0.0944303	0.0944303	0.0944303	0.0944303	0.0944303	0.0944303	0.0944303	0.0944303	0.0944303	0.0944303	0.0944303	0.0944303	0.0944303	0.0944303	0.0944303	0.0944303
Neuron_170	0.0736608	0.0739313	0.0739344	0.0739344	0.0739344	0.0739344	0.0739344	0.0739344	0.0739344	0.0739344	0.0739344	0.0739344	0.0739344	0.0739344	0.0739344	0.0739344	0.0739344	0.0739344	0.0739344	0.0739344	0.0739344	0.0739344	0.0739344	0.0739344	0.0739344	0.0739344	0.0739344	0.0739344	0.0739344	0.0739344	0.0739344	0.0739344	0.0739344	0.0739344	0.0739344	0.0739344	0.0739344	0.0739344	0.0739344	0.0739344	0.0739344	0.0739344	0.0739344	0.0739344	0.0739344	0.0739344	0.0739344	0.0739344	0.0739344
Neuron_171	0.00948001	0.00971397	0.00971038	0.00971043	0.00971044	0.00971044	0.00971044	0.00971044	0.00971044	0.00971044	0.00971044	0.00971044	0.00971044	0.00971044	0.00971044	0.00971044	0.00971044	0.00971044	0.00971044	0.00971044	0.00971044	0.00971044	0.00971044	0.00971044	0.00971044	0.00971044	0.00971044	0.00971044	0.00971044	0.00971044	0.00971044	0.00971044	0.00971044	0.00971044	0.00971044	0.00971044	0.00971044	0.00971044	0.00971044	0.00971044	0.00971044	0.00971044	0.00971044	0.00971044	0.00971044	0.00971044	0.00971044	0.00971044	0.00971044
Neuron_172	0.00963213	0.0101243	0.0101335	0.0101334	0.0101334	0.0101334	0.0101334	0.0101334	0.0101334	0.0101334	0.0101334	0.0101334	0.0101334	0.0101334	0.0101334	0.0101334	0.0101334	0.0101334	0.0101334	0.0101334	0.0101334	0.0101334	0.0101334	0.0101334	0.0101334	0.0101334	0.0101334	0.0101334	0.0101334	0.0101334	0.0101334	0.0101334	0.0101334	0.0101334	0.0101334	0.0101334	0.0101334	0.0101334	0.0101334	0.0101334	0.0101334	0.0101334	0.0101334	0.0101334	0.0101334	0.0101334	0.0101334	0.0101334	0.0101334
Neuron_173	0.0602806	0.0597488	0.0597422	0.0597422	0.0597422	0.0597422	0.0597422	0.0597422	0.0597422	0.0597422	0.0597422	0.0597422	0.0597422	0.0597422	0.0597422	0.0597422	0.0597422	0.0597422	0.0597422	0.0597422	0.0597422	0.0597422	0.0597422	0.0597422	0.0597422	0.0597422	0.0597422	0.0597422	0.0597422	0.0597422	0.0597422	0.0597422	0.0597422	0.0597422	0.0597422	0.0597422	0.0597422	0.0597422	0.0597422	0.0597422	0.0597422	0.0597422	0.0597422	0.0597422	0.0597422	0.0597422	0.0597422	0.0597422	0.0597422
Neuron_174	0.0529371	0.052576	0.0525811	0.0525811	0.0525811	0.0525811	0.0525811	0.0525811	0.0525811	0.0525811	0.0525811	0.0525811	0.0525811	0.0525811	0.0525811	0.0525811	0.0525811	0.0525811	0.0525811	0.0525811	0.0525811	0.0525811	0.0525811	0.0525811	0.0525811	0.0525811	0.0525811	0.0525811	0.0525811	0.0525811	0.0525811	0.0525811	0.0525811	0.0525811	0.0525811	0.0525811	0.0525811	0.0525811	0.0525811	0.0525811	0.0525811	0.0525811	0.0525811	0.0525811	0.0525811	0.0525811	0.0525811	0.0525811	0.0525811
Neuron_175	0.0776393	0.0785431	0.0785417	0.0785417	0.0785417	0.0785417	0.0785417	0.0785417	0.0785417	0.0785417	0.0785417	0.0785417	0.0785417	0.0785417	0.0785417	0.0785417	0.0785417	0.0785417	0.0785417	0.0785417	0.0785417	0.0785417	0.0785417	0.0785417	0.0785417	0.0785417	0.0785417	0.0785417	0.0785417	0.0785417	0.0785417	0.0785417	0.0785417	0.0785417	0.0785417	0.0785417	0.0785417	0.0785417	0.0785417	0.0785417	0.0785417	0.0785417	0.0785417	0.0785417	0.0785417	0.0785417	0.0785417	0.0785417	0.0785417
Neuron_176	0.00708118	0.00741633	0.00741602	0.00741605	0.00741605	0.00741605	0.00741605	0.00741605	0.00741605	0.00741605	0.00741605	0.00741605	0.00741605	0.00741605	0.00741605	0.00741605	0.00741605	0.00741605	0.00741605	0.00741605	0.00741605	0.00741605	0.00741605	0.00741605	0.00741605	0.00741605	0.00741605	0.00741605	0.00741605	0.00741605	0.00741605	0.00741605	0.00741605	0.00741605	0.00741605	0.00741605	0.00741605	0.00741605	0.00741605	0.00741605	0.00741605	0.00741605	0.00741605	0.00741605	0.00741605	0.00741605	0.00741605	0.00741605	0.00741605
Neuron_177	0.0168111	0.0165679	0.0165775	0.0165774	0.0165774	0.0165774	0.0165774	0.0165774	0.0165774	0.0165774	0.0165774	0.0165774	0.0165774	0.0165774	0.0165774	0.0165774	0.0165774	0.0165774	0.0165774	0.0165774	0.0165774	0.0165774	0.0165774	0.0165774	0.0165774	0.0165774	0.0165774	0.0165774	0.0165774	0.0165774	0.0165774	0.0165774	0.0165774	0.0165774	0.0165774	0.0165774	0.0165774	0.0165774	0.0165774	0.0165774	0.0165774	0.0165774	0.0165774	0.0165774	0.0165774	0.0165774	0.0165774	0.0165774	0.0165774
Neuron_178	0.0459558	0.0455857	0.0455895	0.0455896	0.0455896	0.0455896	0.0455896	0.0455896	0.0455896	0.0455896	0.0455896	0.0455896	0.0455896	0.0455896	0.0455896	0.0455896	0.0455896	0.0455896	0.0455896	0.0455896	0.0455896	0.0455896	0.0455896	0.0455896	0.0455896	0.0455896	0.0455896	0.0455896	0.0455896	0.0455896	0.0455896	0.0455896	0.0455896	0.0455896	0.0455896	0.0455896	0.0455896	0.0455896	0.0455896	0.0455896	0.0455896	0.0455896	0.0455896	0.0455896	0.0455896	0.0455896	0.0455896	0.0455896	0.0455896
Neuron_179	0.0792151	0.0795416	0.0795383	0.0795383	0.0795383	0.0795383	0.0795383	0.0795383	0.0795383	0.0795383	0.0795383	0.0795383	0.0795383	0.0795383	0.0795383	0.0795383	0.0795383	0.0795383	0.0795383	0.0795383	0.0795383	0.0795383	0.0795383	0.0795383	0.0795383	0.0795383	0.0795383	0.0795383	0.0795383	0.0795383	0.0795383	0.0795383	0.0795383	0.0795383	0.0795383	0.0795383	0.0795383	0.0795383	0.0795383	0.0795383	0.0795383	0.0795383	0.0795383	0.0795383	0.0795383	0.0795383	0.0795383	0.0795383	0.0795383
Neuron_180	0.000557315	0.00118405	0.00118931	0.00118928	0.00118928	0.00118928	0.00118928	0.00118928	0.00118928	0.00118928	0.00118928	0.00118928	0.00118928	0.00118928	0.00118928	0.00118928	0.00118928	0.00118928	0.00118928	0.00118928	0.00118928	0.00118928	0.00118928	0.00118928	0.00118928	0.00118928	0.00118928	0.00118928	0.00118928	0.00118928	0.00118928	0.00118928	0.00118928	0.00118928	0.00118928	0.00118928	0.00118928	0.00118928	0.00118928	0.00118928	0.00118928	0.00118928	0.00118928	0.00118928	0.00118928	0.00118928	0.00118928	0.00118928	0.00118928
Neuron_181	0.00167042	0.00179414	0.00179095	0.00179104	0.00179104	0.00179104	0.00179104	0.00179104	0.00179104	0.00179104	0.00179104	0.00179104	0.00179104	0.00179104	0.00179104	0.00179104	0.00179104	0.00179104	0.00179104	0.00179104	0.00179104	0.00179104	0.00179104	0.00179104	0.00179104	0.00179104	0.00179104	0.00179104	0.00179104	0.00179104	0.00179104	0.00179104	0.00179104	0.00179104	0.00179104	0.00179104	0.00179104	0.00179104	0.00179104	0.00179104	0.00179104	0.00179104	0.00179104	0.00179104	0.00179104	0.00179104	0.00179104	0.00179104	0.00179104
Neuron_182	0.00944621	0.008749	0.00875466	0.00875465	0.00875465	0.00875465	0.00875465	0.00875465	0.00875465	0.00875465	0.00875465	0.00875465	0.00875465	0.00875465	0.00875465	0.00875465	0.00875465	0.00875465	0.00875465	0.00875465	0.00875465	0.00875465	0.00875465	0.00875465	0.00875465	0.00875465	0.00875465	0.00875465	0.00875465	0.00875465	0.00875465	0.00875465	0.00875465	0.00875465	0.00875465	0.00875465	0.00875465	0.00875465	0.00875465	0.00875465	0.00875465	0.00875465	0.00875465	0.00875465	0.00875465	0.00875465	0.00875465	0.00875465	0.00875465
Neuron_183	0.0206869	0.0201043	0.020102	0.0201019	0.0201019	0.0201019	0.0201019	0.0201019	0.0201019	0.0201019	0.0201019	0.0201019	0.0201019	0.0201019	0.0201019	0.0201019	0.0201019	0.0201019	0.0201019	0.0201019	0.0201019	0.0201019	0.0201019	0.0201019	0.0201019	0.0201019	0.0201019	0.0201019	0.0201019	0.0201019	0.0201019	0.0201019	0.0201019	0.0201019	0.0201019	0.0201019	0.0201019	0.0201019	0.0201019	0.0201019	0.0201019	0.0201019	0.0201019	0.0201019	0.0201019	0.0201019	0.0201019	0.0201019	0.0201019
Neuron_184	0.0183121	0.0180335	0.0180383	0.0180384	0.0180384	0.0180384	0.0180384	0.0180384	0.0180384	0.0180384	0.0180384	0.0180384	0.0180384	0.0180384	0.0180384	0.0180384	0.0180384	0.0180384	0.0180384	0.0180384	0.0180384	0.0180384	0.0180384	0.0180384	0.0180384	0.0180384	0.0180384	0.0180384	0.0180384	0.0180384	0.0180384	0.0180384	0.0180384	0.0180384	0.0180384	0.0180384	0.0180384	0.0180384	0.0180384	0.0180384	0.0180384	0.0180384	0.0180384	0.0180384	0.0180384	0.0180384	0.0180384	0.0180384	0.0180384
Neuron_185	0.0783604	0.077757	0.0777654	0.0777654	0.0777654	0.0777654	0.0777654	0.0777654	0.0777654	0.0777654	0.0777654	0.0777654	0.0777654	0.0777654	0.0777654	0.0777654	0.0777654	0.0777654	0.0777654	0.0777654	0.0777654	0.0777654	0.0777654	0.0777654	0.0777654	0.0777654	0.0777654	0.0777654	0.0777654	0.0777654	0.0777654	0.0777654	0.0777654	0.0777654	0.0777654	0.0777654	0.0777654	0.0777654	0.0777654	0.0777654	0.0777654	0.0777654	0.0777654	0.0777654	0.0777654	0.0777654	0.0777654	0.0777654	0.0777654
Neuron_186	0.0681486	0.0671462	0.0671572	0.0671572	0.0671572	0.0671572	0.0671572	0.0671572	0.0671572	0.0671572	0.0671572	0.0671572	0.0671572	0.0671572	0.0671572	0.0671572	0.0671572	0.0671572	0.0671572	0.0671572	0.0671572	0.0671572	0.0671572	0.0671572	0.0671572	0.0671572	0.0671572	0.0671572	0.0671572	0.0671572	0.0671572	0.0671572	0.0671572	0.0671572	0.0671572	0.0671572	0.0671572	0.0671572	0.0671572	0.0671572	0.0671572	0.0671572	0.0671572	0.0671572	0.0671572	0.0671572	0.0671572	0.0671572	0.0671572
Neuron_187	0.00560091	0.00510992	0.00511652	0.00511647	0.00511647	0.00511647	0.00511647	0.00511647	0.00511647	0.00511647	0.00511647	0.00511647	0.00511647	0.00511647	0.00511647	0.00511647	0.00511647	0.00511647	0.00511647	0.00511647	0.00511647	0.00511647	0.00511647	0.00511647	0.00511647	0.00511647	0.00511647	0.00511647	0.00511647	0.00511647	0.00511647	0.00511647	0.00511647	0.00511647	0.00511647	0.00511647	0.00511647	0.00511647	0.00511647	0.00511647	0.00511647	0.00511647	0.00511647	0.00511647	0.00511647	0.00511647	0.00511647	0.00511647	0.00511647
Neuron_188	0.0719652	0.0716614	0.0716564	0.0716563	0.0716563	0.0716563	0.0716563	0.0716563	0.0716563	0.0716563	0.0716563	0.0716563	0.0716563	0.0716563	0.0716563	0.0716563	0.0716563	0.0716563	0.0716563	0.0716563	0.0716563	0.0716563	0.0716563	0.0716563	0.0716563	0.0716563	0.0716563	0.0716563	0.0716563	0.0716563	0.0716563	0.0716563	0.0716563	0.0716563	0.0716563	0.0716563	0.0716563	0.0716563	0.0716563	0.0716563	0.0716563	0.0716563	0.0716563	0.0716563	0.0716563	0.0716563	0.0716563	0.0716563	0.0716563
Neuron_189	0.0760233	0.0751739	0.0751788	0.0751787	0.0751787	0.0751787	0.0751787	0.0751787	0.0751787	0.0751787	0.0751787	0.0751787	0.0751787	0.0751787	0.0751787	0.0751787	0.0751787	0.0751787	0.0751787	0.0751787	0.0751787	0.0751787	0.0751787	0.0751787	0.0751787	0.0751787	0.0751787	0.0751787	0.0751787	0.0751787	0.0751787	0.0751787	0.0751787	0.0751787	0.0751787	0.0751787	0.0751787	0.0751787	0.0751787	0.0751787	0.0751787	0.0751787	0.0751787	0.0751787	0.0751787	0.0751787	0.0751787	0.0751787	0.0751787
Neuron_190	0.096783	0.0953411	0.0953481	0.0953481	0.0953481	0.0953481	0.0953481	0.0953481	0.0953481	0.0953481	0.0953481	0.0953481	0.0953481	0.0953481	0.0953481	0.0953481	0.0953481	0.0953481	0.0953481	0.0953481	0.0953481	0.0953481	0.0953481	0.0953481	0.0953481	0.0953481	0.0953481	0.0953481	0.0953481	0.0953481	0.0953481	0.0953481	0.0953481	0.0953481	0.0953481	0.0953481	0.0953481	0.0953481	0.0953481	0.0953481	0.0953481	0.0953481	0.0953481	0.0953481	0.0953481	0.0953481	0.0953481	0.0953481	0.0953481
Neuron_191	0.0362706	0.0351303	0.0351399	0.03514	0.03514	0.03514	0.03514	0.03514	0.03514	0.03514	0.03514	0.03514	0.03514	0.03514	0.03514	0.03514	0.03514	0.03514	0.03514	0.03514	0.03514	0.03514	0.03514	0.03514	0.03514	0.03514	0.03514	0.03514	0.03514	0.03514	0.03514	0.03514	0.03514	0.03514	0.03514	0.03514	0.03514	0.03514	0.03514	0.03514	0.03514	0.03514	0.03514	0.03514	0.03514	0.03514	0.03514	0.03514	0.03514
Neuron_192	0.0659393	0.0654018	0.0654112	0.0654112	0.0654112	0.0654112	0.0654112	0.0654112	0.0654112	0.0654112	0.0654112	0.0654112	0.0654112	0.0654112	0.0654112	0.0654112	0.0654112	0.0654112	0.0654112	0.0654112	0.0654112	0.0654112	0.0654112	0.0654112	0.0654112	0.0654112	0.0654112	0.0654112	0.0654112	0.0654112	0.0654112	0.0654112	0.0654112	0.0654112	0.0654112	0.0654112	0.0654112	0.0654112	0.0654112	0.0654112	0.0654112	0.0654112	0.0654112	0.0654112	0.0654112	0.0654112	0.0654112	0.0654112	0.0654112
Neuron_193	0.00930324	0.0087829	0.00877889	0.00877878	0.00877878	0.00877878	0.00877878	0.00877878	0.00877878	0.00877878	0.00877878	0.00877878	0.00877878	0.00877878	0.00877878	0.00877878	0.00877878	0.00877878	0.00877878	0.00877878	0.00877878	0.00877878	0.00877878	0.00877878	0.00877878	0.00877878	0.00877878	0.00877878	0.00877878	0.00877878	0.00877878	0.00877878	0.00877878	0.00877878	0.00877878	0.00877878	0.00877878	0.00877878	0.00877878	0.00877878	0.00877878	0.00877878	0.00877878	0.00877878	0.00877878	0.00877878	0.00877878	0.00877878	0.00877878
Neuron_194	0.0081906	0.00869919	0.00869249	0.0086925	0.0086925	0.0086925	0.0086925	0.0086925	0.0086925	0.0086925	0.0086925	0.0086925	0.0086925	0.0086925	0.0086925	0.0086925	0.0086925	0.0086925	0.0086925	0.0086925	0.0086925	0.0086925	0.0086925	0.0086925	0.0086925	0.0086925	0.0086925	0.0086925	0.0086925	0.0086925	0.0086925	0.0086925	0.0086925	0.0086925	0.0086925	0.0086925	0.0086925	0.0086925	0.0086925	0.0086925	0.0086925	0.0086925	0.0086925	0.0086925	0.0086925	0.0086925	0.0086925	0.0086925	0.0086925
Neuron_195	0.0980788	0.098114	0.0981143	0.0981144	0.0981144	0.0981144	0.0981144	0.0981144	0.0981144	0.0981144	0.0981144	0.0981144	0.0981144	0.0981144	0.0981144	0.0981144	0.0981144	0.0981144	0.0981144	0.0981144	0.0981144	0.0981144	0.0981144	0.0981144	0.0981144	0.0981144	0.0981144	0.0981144	0.0981144	0.0981144	0.0981144	0.0981144	0.0981144	0.0981144	0.0981144	0.0981144	0.0981144	0.0981144	0.0981144	0.0981144	0.0981144	0.0981144	0.0981144	0.0981144	0.0981144	0.0981144	0.0981144	0.0981144	0.0981144
Neuron_196	0.0435352	0.0439003	0.0438974	0.0438974	0.0438974	0.0438974	0.0438974	0.0438974	0.0438974	0.0438974	0.0438974	0.0438974	0.0438974	0.0438974	0.0438974	0.0438974	0.0438974	0.0438974	0.0438974	0.0438974	0.0438974	0.0438974	0.0438974	0.0438974	0.0438974	0.0438974	0.0438974	0.0438974	0.0438974	0.0438974	0.0438974	0.0438974	0.0438974	0.0438974	0.0438974	0.0438974	0.0438974	0.0438974	0.0438974	0.0438974	0.0438974	0.0438974	0.0438974	0.0438974	0.0438974	0.0438974	0.0438974	0.0438974	0.0438974
Neuron_197	0.0465181	0.0463064	0.0463084	0.0463084	0.0463084	0.0463084	0.0463084	0.0463084	0.0463084	0.0463084	0.0463084	0.0463084	0.0463084	0.0463084	0.0463084	0.0463084	0.0463084	0.0463084	0.0463084	0.0463084	0.0463084	0.0463084	0.0463084	0.0463084	0.0463084	0.0463084	0.0463084	0.0463084	0.0463084	0.0463084	0.0463084	0.0463084	0.0463084	0.0463084	0.0463084	0.0463084	0.0463084	0.0463084	0.0463084	0.0463084	0.0463084	0.0463084	0.0463084	0.0463084	0.0463084	0.0463084	0.0463084	0.0463084	0.0463084
Neuron_198	0.0106393	0.0102167	0.0102111	0.0102112	0.0102112	0.0102112	0.0102112	0.0102112	0.0102112	0.0102112	0.0102112	0.0102112	0.0102112	0.0102112	0.0102112	0.0102112	0.0102112	0.0102112	0.0102112	0.0102112	0.0102112	0.0102112	0.0102112	0.0102112	0.0102112	0.0102112	0.0102112	0.0102112	0.0102112	0.0102112	0.0102112	0.0102112	0.0102112	0.0102112	0.0102112	0.0102112	0.0102112	0.0102112	0.0102112	0.0102112	0.0102112	0.0102112	0.0102112	0.0102112	0.0102112	0.0102112	0.0102112	0.0102112	0.0102112
Neuron_199	0.067929	0.0677438	0.0677414	0.0677414	0.0677414	0.0677414	0.0677414	0.0677414	0.0677414	0.0677414	0.0677414	0.0677414	0.0677414	0.0677414	0.0677414	0.0677414	0.0677414	0.0677414	0.0677414	0.0677414	0.0677414	0.0677414	0.0677414	0.0677414	0.0677414	0.0677414	0.0677414	0.0677414	0.0677414	0.0677414	0.0677414	0.0677414	0.0677414	0.0677414	0.0677414	0.0677414	0.0677414	0.0677414	0.0677414	0.0677414	0.0677414	0.0677414	0.0677414	0.0677414	0.0677414	0.0677414	0.0677414	0.0677414	0.0677414
Neuron_200	0.0517146	0.0521835	0.0521906	0.0521905	0.0521905	0.0521905	0.0521905	0.0521905	0.0521905	0.0521905	0.0521905	0.0521905	0.0521905	0.0521905	0.0521905	0.0521905	0.0521905	0.0521905	0.0521905	0.0521905	0.0521905	0.0521905	0.0521905	0.0521905	0.0521905	0.0521905	0.0521905	0.0521905	0.0521905	0.0521905	0.0521905	0.0521905	0.0521905	0.0521905	0.0521905	0.0521905	0.0521905	0.0521905	0.0521905	0.0521905	0.0521905	0.0521905	0.0521905	0.0521905	0.0521905	0.0521905	0.0521905	0.0521905	0.0521905
Neuron_201	0.095516	0.0941442	0.0941432	0.0941432	0.0941432	0.0941432	0.0941432	0.0941432	0.0941432	0.0941432	0.0941432	0.0941432	0.0941432	0.0941432	0.0941432	0.0941432	0.0941432	0.0941432	0.0941432	0.0941432	0.0941432	0.0941432	0.0941432	0.0941432	0.0941432	0.0941432	0.0941432	0.0941432	0.0941432	0.0941432	0.0941432	0.0941432	0.0941432	0.0941432	0.0941432	0.0941432	0.0941432	0.0941432	0.0941432	0.0941432	0.0941432	0.0941432	0.0941432	0.0941432	0.0941432	0.0941432	0.0941432	0.0941432	0.0941432
Neuron_202	0.0529219	0.053722	0.0537239	0.0537239	0.0537239	0.0537239	0.0537239	0.0537239	0.0537239	0.0537239	0.0537239	0.0537239	0.0537239	0.0537239	0.0537239	0.0537239	0.0537239	0.0537239	0.0537239	0.0537239	0.0537239	0.0537239	0.0537239	0.0537239	0.0537239	0.0537239	0.0537239	0.0537239	0.0537239	0.0537239	0.0537239	0.0537239	0.0537239	0.0537239	0.0537239	0.0537239	0.0537239	0.0537239	0.0537239	0.0537239	0.0537239	0.0537239	0.0537239	0.0537239	0.0537239	0.0537239	0.0537239	0.0537239	0.0537239
Neuron_203	0.0776985	0.0782838	0.0782713	0.0782714	0.0782714	0.0782714	0.0782714	0.0782714	0.0782714	0.0782714	0.0782714	0.0782714	0.0782714	0.0782714	0.0782714	0.0782714	0.0782714	0.0782714	0.0782714	0.0782714	0.0782714	0.0782714	0.0782714	0.0782714	0.0782714	0.0782714	0.0782714	0.0782714	0.0782714	0.0782714	0.0782714	0.0782714	0.0782714	0.0782714	0.0782714	0.0782714	0.0782714	0.0782714	0.0782714	0.0782714	0.0782714	0.0782714	0.0782714	0.0782714	0.0782714	0.0782714	0.0782714	0.0782714	0.0782714
Neuron_204	0.065916	0.0659346	0.0659339	0.0659339	0.0659339	0.0659339	0.0659339	0.0659339	0.0659339	0.0659339	0.0659339	0.0659339	0.0659339	0.0659339	0.0659339	0.0659339	0.0659339	0.0659339	0.0659339	0.0659339	0.0659339	0.0659339	0.0659339	0.0659339	0.0659339	0.0659339	0.0659339	0.0659339	0.0659339	0.0659339	0.0659339	0.0659339	0.0659339	0.0659339	0.0659339	0.0659339	0.0659339	0.0659339	0.0659339	0.0659339	0.0659339	0.0659339	0.0659339	0.0659339	0.0659339	0.0659339	0.0659339	0.0659339	0.0659339
Neuron_205	0.0541716	0.0543203	0.0543176	0.0543177	0.0543177	0.0543177	0.0543177	0.0543177	0.0543177	0.0543177	0.0543177	0.0543177	0.0543177	0.0543177	0.0543177	0.0543177	0.0543177	0.0543177	0.0543177	0.0543177	0.0543177	0.0543177	0.0543177	0.0543177	0.0543177	0.0543177	0.0543177	0.0543177	0.0543177	0.0543177	0.0543177	0.0543177	0.0543177	0.0543177	0.0543177	0.0543177	0.0543177	0.0543177	0.0543177	0.0543177	0.0543177	0.0543177	0.0543177	0.0543177	0.0543177	0.0543177	0.0543177	0.0543177	0.0543177
Neuron_206	0.0822353	0.0830056	0.083005	0.0830049	0.0830049	0.0830049	0.0830049	0.0830049	0.0830049	0.0830049	0.0830049	0.0830049	0.0830049	0.0830049	0.0830049	0.0830049	0.0830049	0.0830049	0.0830049	0.0830049	0.0830049	0.0830049	0.0830049	0.0830049	0.0830049	0.0830049	0.0830049	0.0830049	0.0830049	0.0830049	0.0830049	0.0830049	0.0830049	0.0830049	0.0830049	0.0830049	0.0830049	0.0830049	0.0830049	0.0830049	0.0830049	0.0830049	0.0830049	0.0830049	0.0830049	0.0830049	0.0830049	0.0830049	0.0830049
Neuron_207	0.00525157	0.0053802	0.00538193	0.00538188	0.00538188	0.00538188	0.00538188	0.00538188	0.00538188	0.00538188	0.00538188	0.00538188	0.00538188	0.00538188	0.00538188	0.00538188	0.00538188	0.00538188	0.00538188	0.00538188	0.00538188	0.00538188	0.00538188	0.00538188	0.00538188	0.00538188	0.00538188	0.00538188	0.00538188	0.00538188	0.00538188	0.00538188	0.00538188	0.00538188	0.00538188	0.00538188	0.00538188	0.00538188	0.00538188	0.00538188	0.00538188	0.00538188	0.00538188	0.00538188	0.00538188	0.00538188	0.00538188	0.00538188	0.00538188
Neuron_208	0.0445411	0.0445568	0.0445587	0.0445587	0.0445587	0.0445587	0.0445587	0.0445587	0.0445587	0.0445587	0.0445587	0.0445587	0.0445587	0.0445587	0.0445587	0.0445587	0.0445587	0.0445587	0.0445587	0.0445587	0.0445587	0.0445587	0.0445587	0.0445587	0.0445587	0.0445587	0.0445587	0.0445587	0.0445587	0.0445587	0.0445587	0.0445587	0.0445587	0.0445587	0.0445587	0.0445587	0.0445587	0.0445587	0.0445587	0.0445587	0.0445587	0.0445587	0.0445587	0.0445587	0.0445587	0.0445587	0.0445587	0.0445587	0.0445587
Neuron_209	0.0102561	0.0104786	0.0104715	0.0104715	0.0104715	0.0104715	0.0104715	0.0104715	0.0104715	0.0104715	0.0104715	0.0104715	0.0104715	0.0104715	0.0104715	0.0104715	0.0104715	0.0104715	0.0104715	0.0104715	0.0104715	0.0104715	0.0104715	0.0104715	0.0104715	0.0104715	0.0104715	0.0104715	0.0104715	0.0104715	0.0104715	0.0104715	0.0104715	0.0104715	0.0104715	0.0104715	0.0104715	0.0104715	0.0104715	0.0104715	0.0104715	0.0104715	0.0104715	0.0104715	0.0104715	0.0104715	0.0104715	0.0104715	0.0104715
Neuron_210	0.0249524	0.0244995	0.0244978	0.0244977	0.0244977	0.0244977	0.0244977	0.0244977	0.0244977	0.0244977	0.0244977	0.0244977	0.0244977	0.0244977	0.0244977	0.0244977	0.0244977	0.0244977	0.0244977	0.0244977	0.0244977	0.0244977	0.0244977	0.0244977	0.0244977	0.0244977	0.0244977	0.0244977	0.0244977	0.0244977	0.0244977	0.0244977	0.0244977	0.0244977	0.0244977	0.0244977	0.0244977	0.0244977	0.0244977	0.0244977	0.0244977	0.0244977	0.0244977	0.0244977	0.0244977	0.0244977	0.0244977	0.0244977	0.0244977
Neuron_211	0.0545585	0.0541084	0.0541114	0.0541114	0.0541114	0.0541114	0.0541114	0.0541114	0.0541114	0.0541114	0.0541114	0.0541114	0.0541114	0.0541114	0.0541114	0.0541114	0.0541114	0.0541114	0.0541114	0.0541114	0.0541114	0.0541114	0.0541114	0.0541114	0.0541114	0.0541114	0.0541114	0.0541114	0.0541114	0.0541114	0.0541114	0.0541114	0.0541114	0.0541114	0.0541114	0.0541114	0.0541114	0.0541114	0.0541114	0.0541114	0.0541114	0.0541114	0.0541114	0.0541114	0.0541114	0.0541114	0.0541114	0.0541114	0.0541114
Neuron_212	0.0394844	0.0390275	0.0390297	0.0390297	0.0390297	0.0390297	0.0390297	0.0390297	0.0390297	0.0390297	0.0390297	0.0390297	0.0390297	0.0390297	0.0390297	0.0390297	0.0390297	0.0390297	0.0390297	0.0390297	0.0390297	0.0390297	0.0390297	0.0390297	0.0390297	0.0390297	0.0390297	0.0390297	0.0390297	0.0390297	0.0390297	0.0390297	0.0390297	0.0390297	0.0390297	0.0390297	0.0390297	0.0390297	0.0390297	0.0390297	0.0390297	0.0390297	0.0390297	0.0390297	0.0390297	0.0390297	0.0390297	0.0390297	0.0390297
Neuron_213	0.0994553	0.0996801	0.099678	0.099678	0.099678	0.099678	0.099678	0.099678	0.099678	0.099678	0.099678	0.099678	0.099678	0.099678	0.099678	0.099678	0.099678	0.099678	0.099678	0.099678	0.099678	0.099678	0.099678	0.099678	0.099678	0.099678	0.099678	0.099678	0.099678	0.099678	0.099678	0.099678	0.099678	0.099678	0.099678	0.099678	0.099678	0.099678	0.099678	0.099678	0.099678	0.099678	0.099678	0.099678	0.099678	0.099678	0.099678	0.099678	0.099678
Neuron_214	0.0854098	0.0848998	0.0849012	0.0849012	0.0849012	0.0849012	0.0849012	0.0849012	0.0849012	0.0849012	0.0849012	0.0849012	0.0849012	0.0849012	0.0849012	0.0849012	0.0849012	0.0849012	0.0849012	0.0849012	0.0849012	0.0849012	0.0849012	0.0849012	0.0849012	0.0849012	0.0849012	0.0849012	0.0849012	0.0849012	0.0849012	0.0849012	0.0849012	0.0849012	0.0849012	0.0849012	0.0849012	0.0849012	0.0849012	0.0849012	0.0849012	0.0849012	0.0849012	0.0849012	0.0849012	0.0849012	0.0849012	0.0849012	0.0849012
Neuron_215	0.0983117	0.0975188	0.097518	0.0975181	0.0975181	0.0975181	0.0975181	0.0975181	0.0975181	0.0975181	0.0975181	0.0975181	0.0975181	0.0975181	0.0975181	0.0975181	0.0975181	0.0975181	0.0975181	0.0975181	0.0975181	0.0975181	0.0975181	0.0975181	0.0975181	0.0975181	0.0975181	0.0975181	0.0975181	0.0975181	0.0975181	0.0975181	0.0975181	0.0975181	0.0975181	0.0975181	0.0975181	0.0975181	0.0975181	0.0975181	0.0975181	0.0975181	0.0975181	0.0975181	0.0975181	0.0975181	0.0975181	0.0975181	0.0975181
Neuron_216	0.07154	0.0713182	0.0713254	0.0713255	0.0713254	0.0713254	0.0713254	0.0713254	0.0713254	0.0713254	0.0713254	0.0713254	0.0713254	0.0713254	0.0713254	0.0713254	0.0713254	0.0713254	0.0713254	0.0713254	0.0713254	0.0713254	0.0713254	0.0713254	0.0713254	0.0713254	0.0713254	0.0713254	0.0713254	0.0713254	0.0713254	0.0713254	0.0713254	0.0713254	0.0713254	0.0713254	0.0713254	0.0713254	0.0713254	0.0713254	0.0713254	0.0713254	0.0713254	0.0713254	0.0713254	0.0713254	0.0713254	0.0713254	0.0713254
Neuron_217	0.0120253	0.0124671	0.0124723	0.0124723	0.0124723	0.0124723	0.0124723	0.0124723	0.0124723	0.0124723	0.0124723	0.0124723	0.0124723	0.0124723	0.0124723	0.0124723	0.0124723	0.0124723	0.0124723	0.0124723	0.0124723	0.0124723	0.0124723	0.0124723	0.0124723	0.0124723	0.0124723	0.0124723	0.0124723	0.0124723	0.0124723	0.0124723	0.0124723	0.0124723	0.0124723	0.0124723	0.0124723	0.0124723	0.0124723	0.0124723	0.0124723	0.0124723	0.0124723	0.0124723	0.0124723	0.0124723	0.0124723	0.0124723	0.0124723
Neuron_218	0.0232666	0.0232377	0.0232294	0.0232295	0.0232295	0.0232295	0.0232295	0.0232295	0.0232295	0.0232295	0.0232295	0.0232295	0.0232295	0.0232295	0.0232295	0.0232295	0.0232295	0.0232295	0.0232295	0.0232295	0.0232295	0.0232295	0.0232295	0.0232295	0.0232295	0.0232295	0.0232295	0.0232295	0.0232295	0.0232295	0.0232295	0.0232295	0.0232295	0.0232295	0.0232295	0.0232295	0.0232295	0.0232295	0.0232295	0.0232295	0.0232295	0.0232295	0.0232295	0.0232295	0.0232295	0.0232295	0.0232295	0.0232295	0.0232295
Neuron_219	0.00527348	0.00495	0.00495617	0.00495611	0.00495611	0.00495611	0.00495611	0.00495611	0.00495611	0.00495611	0.00495611	0.00495611	0.00495611	0.00495611	0.00495611	0.00495611	0.00495611	0.00495611	0.00495611	0.00495611	0.00495611	0.00495611	0.00495611	0.00495611	0.00495611	0.00495611	0.00495611	0.00495611	0.00495611	0.00495611	0.00495611	0.00495611	0.00495611	0.00495611	0.00495611	0.00495611	0.00495611	0.00495611	0.00495611	0.00495611	0.00495611	0.00495611	0.00495611	0.00495611	0.00495611	0.00495611	0.00495611	0.00495611	0.00495611
Neuron_220	0.0183487	0.0186294	0.0186317	0.0186318	0.0186318	0.0186318	0.0186318	0.0186318	0.0186318	0.0186318	0.0186318	0.0186318	0.0186318	0.0186318	0.0186318	0.0186318	0.0186318	0.0186318	0.0186318	0.0186318	0.0186318	0.0186318	0.0186318	0.0186318	0.0186318	0.0186318	0.0186318	0.0186318	0.0186318	0.0186318	0.0186318	0.0186318	0.0186318	0.0186318	0.0186318	0.0186318	0.0186318	0.0186318	0.0186318	0.0186318	0.0186318	0.0186318	0.0186318	0.0186318	0.0186318	0.0186318	0.0186318	0.0186318	0.0186318
Neuron_221	0.0399042	0.0405017	0.0405009	0.0405008	0.0405008	0.0405008	0.0405008	0.0405008	0.0405008	0.0405008	0.0405008	0.0405008	0.0405008	0.0405008	0.0405008	0.0405008	0.0405008	0.0405008	0.0405008	0.0405008	0.0405008	0.0405008	0.0405008	0.0405008	0.0405008	0.0405008	0.0405008	0.0405008	0.0405008	0.0405008	0.0405008	0.0405008	0.0405008	0.0405008	0.0405008	0.0405008	0.0405008	0.0405008	0.0405008	0.0405008	0.0405008	0.0405008	0.0405008	0.0405008	0.0405008	0.0405008	0.0405008	0.0405008	0.0405008
Neuron_222	0.013101	0.0129079	0.0129172	0.0129171	0.0129171	0.0129171	0.0129171	0.0129171	0.0129171	0.0129171	0.0129171	0.0129171	0.0129171	0.0129171	0.0129171	0.0129171	0.0129171	0.0129171	0.0129171	0.0129171	0.0129171	0.0129171	0.0129171	0.0129171	0.0129171	0.0129171	0.0129171	0.0129171	0.0129171	0.0129171	0.0129171	0.0129171	0.0129171	0.0129171	0.0129171	0.0129171	0.0129171	0.0129171	0.0129171	0.0129171	0.0129171	0.0129171	0.0129171	0.0129171	0.0129171	0.0129171	0.0129171	0.0129171	0.0129171
Neuron_223	0.0643509	0.0636405	0.0636439	0.0636439	0.0636439	0.0636439	0.0636439	0.0636439	0.0636439	0.0636439	0.0636439	0.0636439	0.0636439	0.0636439	0.0636439	0.0636439	0.0636439	0.0636439	0.0636439	0.0636439	0.0636439	0.0636439	0.0636439	0.0636439	0.0636439	0.0636439	0.0636439	0.0636439	0.0636439	0.0636439	0.0636439	0.0636439	0.0636439	0.0636439	0.0636439	0.0636439	0.0636439	0.0636439	0.0636439	0.0636439	0.0636439	0.0636439	0.0636439	0.0636439	0.0636439	0.0636439	0.0636439	0.0636439	0.0636439
Neuron_224	0.0297441	0.0302983	0.0302973	0.0302974	0.0302974	0.0302974	0.0302974	0.0302974	0.0302974	0.0302974	0.0302974	0.0302974	0.0302974	0.0302974	0.0302974	0.0302974	0.0302974	0.0302974	0.0302974	0.0302974	0.0302974	0.0302974	0.0302974	0.0302974	0.0302974	0.0302974	0.0302974	0.0302974	0.0302974	0.0302974	0.0302974	0.0302974	0.0302974	0.0302974	0.0302974	0.0302974	0.0302974	0.0302974	0.0302974	0.0302974	0.0302974	0.0302974	0.0302974	0.0302974	0.0302974	0.0302974	0.0302974	0.0302974	0.0302974
Neuron_225	0.0820347	0.0818466	0.0818457	0.0818457	0.0818457	0.0818457	0.0818457	0.0818457	0.0818457	0.0818457	0.0818457	0.0818457	0.0818457	0.0818457	0.0818457	0.0818457	0.0818457	0.0818457	0.0818457	0.0818457	0.0818457	0.0818457	0.0818457	0.0818457	0.0818457	0.0818457	0.0818457	0.0818457	0.0818457	0.0818457	0.0818457	0.0818457	0.0818457	0.0818457	0.0818457	0.0818457	0.0818457	0.0818457	0.0818457	0.0818457	0.0818457	0.0818457	0.0818457	0.0818457	0.0818457	0.0818457	0.0818457	0.0818457	0.0818457
Neuron_226	0.0284556	0.0289127	0.0289158	0.0289158	0.0289158	0.0289158	0.0289158	0.0289158	0.0289158	0.0289158	0.0289158	0.0289158	0.0289158	0.0289158	0.0289158	0.0289158	0.0289158	0.0289158	0.0289158	0.0289158	0.0289158	0.0289158	0.0289158	0.0289158	0.0289158	0.0289158	0.0289158	0.0289158	0.0289158	0.0289158	0.0289158	0.0289158	0.0289158	0.0289158	0.0289158	0.0289158	0.0289158	0.0289158	0.0289158	0.0289158	0.0289158	0.0289158	0.0289158	0.0289158	0.0289158	0.0289158	0.0289158	0.0289158	0.0289158
Neuron_227	0.0523495	0.0526206	0.0526134	0.0526133	0.0526133	0.0526133	0.0526133	0.0526133	0.0526133	0.0526133	0.0526133	0.0526133	0.0526133	0.0526133	0.0526133	0.0526133	0.0526133	0.0526133	0.0526133	0.0526133	0.0526133	0.0526133	0.0526133	0.0526133	0.0526133	0.0526133	0.0526133	0.0526133	0.0526133	0.0526133	0.0526133	0.0526133	0.0526133	0.0526133	0.0526133	0.0526133	0.0526133	0.0526133	0.0526133	0.0526133	0.0526133	0.0526133	0.0526133	0.0526133	0.0526133	0.0526133	0.0526133	0.0526133	0.0526133
Neuron_228	0.0246363	0.0241523	0.0241635	0.0241635	0.0241635	0.0241635	0.0241635	0.0241635	0.0241635	0.0241635	0.0241635	0.0241635	0.0241635	0.0241635	0.0241635	0.0241635	0.0241635	0.0241635	0.0241635	0.0241635	0.0241635	0.0241635	0.0241635	0.0241635	0.0241635	0.0241635	0.0241635	0.0241635	0.0241635	0.0241635	0.0241635	0.0241635	0.0241635	0.0241635	0.0241635	0.0241635	0.0241635	0.0241635	0.0241635	0.0241635	0.0241635	0.0241635	0.0241635	0.0241635	0.0241635	0.0241635	0.0241635	0.0241635	0.0241635
Neuron_229	0.0276119	0.0285355	0.0285338	0.0285339	0.0285339	0.0285339	0.0285339	0.0285339	0.0285339	0.0285339	0.0285339	0.0285339	0.0285339	0.0285339	0.0285339	0.0285339	0.0285339	0.0285339	0.0285339	0.0285339	0.0285339	0.0285339	0.0285339	0.0285339	0.0285339	0.0285339	0.0285339	0.0285339	0.0285339	0.0285339	0.0285339	0.0285339	0.0285339	0.0285339	0.0285339	0.0285339	0.0285339	0.0285339	0.0285339	0.0285339	0.0285339	0.0285339	0.0285339	0.0285339	0.0285339	0.0285339	0.0285339	0.0285339	0.0285339
Neuron_230	0.0584185	0.0579201	0.057919	0.0579189	0.0579189	0.0579189	0.0579189	0.0579189	0.0579189	0.0579189	0.0579189	0.0579189	0.0579189	0.0579189	0.0579189	0.0579189	0.0579189	0.0579189	0.0579189	0.0579189	0.0579189	0.0579189	0.0579189	0.0579189	0.0579189	0.0579189	0.0579189	0.0579189	0.0579189	0.0579189	0.0579189	0.0579189	0.0579189	0.0579189	0.0579189	0.0579189	0.0579189	0.0579189	0.0579189	0.0579189	0.0579189	0.0579189	0.0579189	0.0579189	0.0579189	0.0579189	0.0579189	0.0579189	0.0579189
Neuron_231	0.0645969	0.0652775	0.0652807	0.0652806	0.0652806	0.0652806	0.0652806	0.0652806	0.0652806	0.0652806	0.0652806	0.0652806	0.0652806	0.0652806	0.0652806	0.0652806	0.0652806	0.0652806	0.0652806	0.0652806	0.0652806	0.0652806	0.0652806	0.0652806	0.0652806	0.0652806	0.0652806	0.0652806	0.0652806	0.0652806	0.0652806	0.0652806	0.0652806	0.0652806	0.0652806	0.0652806	0.0652806	0.0652806	0.0652806	0.0652806	0.0652806	0.0652806	0.0652806	0.0652806	0.0652806	0.0652806	0.0652806	0.0652806	0.0652806
Neuron_232	0.0118716	0.0124326	0.0124294	0.0124294	0.0124294	0.0124294	0.0124294	0.0124294	0.0124294	0.0124294	0.0124294	0.0124294	0.0124294	0.0124294	0.0124294	0.0124294	0.0124294	0.0124294	0.0124294	0.0124294	0.0124294	0.0124294	0.0124294	0.0124294	0.0124294	0.0124294	0.0124294	0.0124294	0.0124294	0.0124294	0.0124294	0.0124294	0.0124294	0.0124294	0.0124294	0.0124294	0.0124294	0.0124294	0.0124294	0.0124294	0.0124294	0.0124294	0.0124294	0.0124294	0.0124294	0.0124294	0.0124294	0.0124294	0.0124294
Neuron_233	0.0985302	0.0980923	0.0980995	0.0980995	0.0980995	0.0980995	0.0980995	0.0980995	0.0980995	0.0980995	0.0980995	0.0980995	0.0980995	0.0980995	0.0980995	0.0980995	0.0980995	0.0980995	0.0980995	0.0980995	0.0980995	0.0980995	0.0980995	0.0980995	0.0980995	0.0980995	0.0980995	0.0980995	0.0980995	0.0980995	0.0980995	0.0980995	0.0980995	0.0980995	0.0980995	0.0980995	0.0980995	0.0980995	0.0980995	0.0980995	0.0980995	0.0980995	0.0980995	0.0980995	0.0980995	0.0980995	0.0980995	0.0980995	0.0980995
Neuron_234	0.0592281	0.0586782	0.0586809	0.0586809	0.0586809	0.0586809	0.0586809	0.0586809	0.0586809	0.0586809	0.0586809	0.0586809	0.0586809	0.0586809	0.0586809	0.0586809	0.0586809	0.0586809	0.0586809	0.0586809	0.0586809	0.0586809	0.0586809	0.0586809	0.0586809	0.0586809	0.0586809	0.0586809	0.0586809	0.0586809	0.0586809	0.0586809	0.0586809	0.0586809	0.0586809	0.0586809	0.0586809	0.0586809	0.0586809	0.0586809	0.0586809	0.0586809	0.0586809	0.0586809	0.0586809	0.0586809	0.0586809	0.0586809	0.0586809
Neuron_235	0.00431771	0.0037408	0.00374193	0.00374192	0.00374192	0.00374192	0.00374192	0.00374192	0.00374192	0.00374192	0.00374192	0.00374192	0.00374192	0.00374192	0.00374192	0.00374192	0.00374192	0.00374192	0.00374192	0.00374192	0.00374192	0.00374192	0.00374192	0.00374192	0.00374192	0.00374192	0.00374192	0.00374192	0.00374192	0.00374192	0.00374192	0.00374192	0.00374192	0.00374192	0.00374192	0.00374192	0.00374192	0.00374192	0.00374192	0.00374192	0.00374192	0.00374192	0.00374192	0.00374192	0.00374192	0.00374192	0.00374192	0.00374192	0.00374192
Neuron_236	0.0489247	0.0486487	0.0486512	0.0486513	0.0486513	0.0486513	0.0486513	0.0486513	0.0486513	0.0486513	0.0486513	0.0486513	0.0486513	0.0486513	0.0486513	0.0486513	0.0486513	0.0486513	0.0486513	0.0486513	0.0486513	0.0486513	0.0486513	0.0486513	0.0486513	0.0486513	0.0486513	0.0486513	0.0486513	0.0486513	0.0486513	0.0486513	0.0486513	0.0486513	0.0486513	0.0486513	0.0486513	0.0486513	0.0486513	0.0486513	0.0486513	0.0486513	0.0486513	0.0486513	0.0486513	0.0486513	0.0486513	0.0486513	0.0486513
Neuron_237	0.0148318	0.0152389	0.015233	0.015233	0.015233	0.015233	0.015233	0.015233	0.015233	0.015233	0.015233	0.015233	0.015233	0.015233	0.015233	0.015233	0.015233	0.015233	0.015233	0.015233	0.015233	0.015233	0.015233	0.015233	0.015233	0.015233	0.015233	0.015233	0.015233	0.015233	0.015233	0.015233	0.015233	0.015233	0.015233	0.015233	0.015233	0.015233	0.015233	0.015233	0.015233	0.015233	0.015233	0.015233	0.015233	0.015233	0.015233	0.015233	0.015233
Neuron_238	0.00976812	0.0103	0.0103042	0.0103042	0.0103042	0.0103042	0.0103042	0.0103042	0.0103042	0.0103042	0.0103042	0.0103042	0.0103042	0.0103042	0.0103042	0.0103042	0.0103042	0.0103042	0.0103042	0.0103042	0.0103042	0.0103042	0.0103042	0.0103042	0.0103042	0.0103042	0.0103042	0.0103042	0.0103042	0.0103042	0.0103042	0.0103042	0.0103042	0.0103042	0.0103042	0.0103042	0.0103042	0.0103042	0.0103042	0.0103042	0.0103042	0.0103042	0.0103042	0.0103042	0.0103042	0.0103042	0.0103042	0.0103042	0.0103042
Neuron_239	0.0850126	0.0851001	0.0850946	0.0850946	0.0850946	0.0850946	0.0850946	0.0850946	0.0850946	0.0850946	0.0850946	0.0850946	0.0850946	0.0850946	0.0850946	0.0850946	0.0850946	0.0850946	0.0850946	0.0850946	0.0850946	0.0850946	0.0850946	0.0850946	0.0850946	0.0850946	0.0850946	0.0850946	0.0850946	0.0850946	0.0850946	0.0850946	0.0850946	0.0850946	0.0850946	0.0850946	0.0850946	0.0850946	0.0850946	0.0850946	0.0850946	0.0850946	0.0850946	0.0850946	0.0850946	0.0850946	0.0850946	0.0850946	0.0850946
Neuron_240	0.0506113	0.0501895	0.0501977	0.0501977	0.0501977	0.0501977	0.0501977	0.0501977	0.0501977	0.0501977	0.0501977	0.0501977	0.0501977	0.0501977	0.0501977	0.0501977	0.0501977	0.0501977	0.0501977	0.0501977	0.0501977	0.0501977	0.0501977	0.0501977	0.0501977	0.0501977	0.0501977	0.0501977	0.0501977	0.0501977	0.0501977	0.0501977	0.0501977	0.0501977	0.0501977	0.0501977	0.0501977	0.0501977	0.0501977	0.0501977	0.0501977	0.0501977	0.0501977	0.0501977	0.0501977	0.0501977	0.0501977	0.0501977	0.0501977
Neuron_241	0.0952609	0.0945573	0.0945582	0.0945581	0.0945581	0.0945581	0.0945581	0.0945581	0.0945581	0.0945581	0.0945581	0.0945581	0.0945581	0.0945581	0.0945581	0.0945581	0.0945581	0.0945581	0.0945581	0.0945581	0.0945581	0.0945581	0.0945581	0.0945581	0.0945581	0.0945581	0.0945581	0.0945581	0.0945581	0.0945581	0.0945581	0.0945581	0.0945581	0.0945581	0.0945581	0.0945581	0.0945581	0.0945581	0.0945581	0.0945581	0.0945581	0.0945581	0.0945581	0.0945581	0.0945581	0.0945581	0.0945581	0.0945581	0.0945581
Neuron_242	0.0619687	0.0620727	0.0620648	0.0620647	0.0620647	0.0620647	0.0620647	0.0620647	0.0620647	0.0620647	0.0620647	0.0620647	0.0620647	0.0620647	0.0620647	0.0620647	0.0620647	0.0620647	0.0620647	0.0620647	0.0620647	0.0620647	0.0620647	0.0620647	0.0620647	0.0620647	0.0620647	0.0620647	0.0620647	0.0620647	0.0620647	0.0620647	0.0620647	0.0620647	0.0620647	0.0620647	0.0620647	0.0620647	0.0620647	0.0620647	0.0620647	0.0620647	0.0620647	0.0620647	0.0620647	0.0620647	0.0620647	0.0620647	0.0620647
Neuron_243	0.0861304	0.0846061	0.0846122	0.084612	0.084612	0.084612	0.084612	0.084612	0.084612	0.084612	0.084612	0.084612	0.084612	0.084612	0.084612	0.084612	0.084612	0.084612	0.084612	0.084612	0.084612	0.084612	0.084612	0.084612	0.084612	0.084612	0.084612	0.084612	0.084612	0.084612	0.084612	0.084612	0.084612	0.084612	0.084612	0.084612	0.084612	0.084612	0.084612	0.084612	0.084612	0.084612	0.084612	0.084612	0.084612	0.084612	0.084612	0.084612	0.084612
Neuron_244	0.0147538	0.015654	0.015644	0.0156441	0.0156441	0.0156441	0.0156441	0.0156441	0.0156441	0.0156441	0.0156441	0.0156441	0.0156441	0.0156441	0.0156441	0.0156441	0.0156441	0.0156441	0.0156441	0.0156441	0.0156441	0.0156441	0.0156441	0.0156441	0.0156441	0.0156441	0.0156441	0.0156441	0.0156441	0.0156441	0.0156441	0.0156441	0.0156441	0.0156441	0.0156441	0.0156441	0.0156441	0.0156441	0.0156441	0.0156441	0.0156441	0.0156441	0.0156441	0.0156441	0.0156441	0.0156441	0.0156441	0.0156441	0.0156441
Neuron_245	0.0708506	0.0704134	0.0704187	0.0704187	0.0704187	0.0704187	0.0704187	0.0704187	0.0704187	0.0704187	0.0704187	0.0704187	0.0704187	0.0704187	0.0704187	0.0704187	0.0704187	0.0704187	0.0704187	0.0704187	0.0704187	0.0704187	0.0704187	0.0704187	0.0704187	0.0704187	0.0704187	0.0704187	0.0704187	0.0704187	0.0704187	0.0704187	0.0704187	0.0704187	0.0704187	0.0704187	0.0704187	0.0704187	0.0704187	0.0704187	0.0704187	0.0704187	0.0704187	0.0704187	0.0704187	0.0704187	0.0704187	0.0704187	0.0704187
Neuron_246	0.0348686	0.034132	0.0341336	0.0341336	0.0341336	0.0341336	0.0341336	0.0341336	0.0341336	0.0341336	0.0341336	0.0341336	0.0341336	0.0341336	0.0341336	0.0341336	0.0341336	0.0341336	0.0341336	0.0341336	0.0341336	0.0341336	0.0341336	0.0341336	0.0341336	0.0341336	0.0341336	0.0341336	0.0341336	0.0341336	0.0341336	0.0341336	0.0341336	0.0341336	0.0341336	0.0341336	0.0341336	0.0341336	0.0341336	0.0341336	0.0341336	0.0341336	0.0341336	0.0341336	0.0341336	0.0341336	0.0341336	0.0341336	0.0341336
Neuron_247	0.0462795	0.046996	0.0469994	0.0469993	0.0469993	0.0469993	0.0469993	0.0469993	0.0469993	0.0469993	0.0469993	0.0469993	0.0469993	0.0469993	0.0469993	0.0469993	0.0469993	0.0469993	0.0469993	0.0469993	0.0469993	0.0469993	0.0469993	0.0469993	0.0469993	0.0469993	0.0469993	0.0469993	0.0469993	0.0469993	0.0469993	0.0469993	0.0469993	0.0469993	0.0469993	0.0469993	0.0469993	0.0469993	0.0469993	0.0469993	0.0469993	0.0469993	0.0469993	0.0469993	0.0469993	0.0469993	0.0469993	0.0469993	0.0469993
Neuron_248	0.0521222	0.0508567	0.0508638	0.0508638	0.0508638	0.0508638	0.0508638	0.0508638	0.0508638	0.0508638	0.0508638	0.0508638	0.0508638	0.0508638	0.0508638	0.0508638	0.0508638	0.0508638	0.0508638	0.0508638	0.0508638	0.0508638	0.0508638	0.0508638	0.0508638	0.0508638	0.0508638	0.0508638	0.0508638	0.0508638	0.0508638	0.0508638	0.0508638	0.0508638	0.0508638	0.0508638	0.0508638	0.0508638	0.0508638	0.0508638	0.0508638	0.0508638	0.0508638	0.0508638	0.0508638	0.0508638	0.0508638	0.0508638	0.0508638
Neuron_249	0.0228381	0.0230415	0.0230465	0.0230465	0.0230465	0.0230465	0.0230465	0.0230465	0.0230465	0.0230465	0.0230465	0.0230465	0.0230465	0.0230465	0.0230465	0.0230465	0.0230465	0.0230465	0.0230465	0.0230465	0.0230465	0.0230465	0.0230465	0.0230465	0.0230465	0.0230465	0.0230465	0.0230465	0.0230465	0.0230465	0.0230465	0.0230465	0.0230465	0.0230465	0.0230465	0.0230465	0.0230465	0.0230465	0.0230465	0.0230465	0.0230465	0.0230465	0.0230465	0.0230465	0.0230465	0.0230465	0.0230465	0.0230465	0.0230465
Neuron_250	0.0850553	0.085492	0.085489	0.085489	0.085489	0.085489	0.085489	0.085489	0.085489	0.085489	0.085489	0.085489	0.085489	0.085489	0.085489	0.085489	0.085489	0.085489	0.085489	0.085489	0.085489	0.085489	0.085489	0.085489	0.085489	0.085489	0.085489	0.085489	0.085489	0.085489	0.085489	0.085489	0.085489	0.085489	0.085489	0.085489	0.085489	0.085489	0.085489	0.085489	0.085489	0.085489	0.085489	0.085489	0.085489	0.085489	0.085489	0.085489	0.085489
Neuron_251	0.0382186	0.0386932	0.0386874	0.0386875	0.0386875	0.0386875	0.0386875	0.0386875	0.0386875	0.0386875	0.0386875	0.0386875	0.0386875	0.0386875	0.0386875	0.0386875	0.0386875	0.0386875	0.0386875	0.0386875	0.0386875	0.0386875	0.0386875	0.0386875	0.0386875	0.0386875	0.0386875	0.0386875	0.0386875	0.0386875	0.0386875	0.0386875	0.0386875	0.0386875	0.0386875	0.0386875	0.0386875	0.0386875	0.0386875	0.0386875	0.0386875	0.0386875	0.0386875	0.0386875	0.0386875	0.0386875	0.0386875	0.0386875	0.0386875
Neuron_252	0.0759693	0.0752298	0.0752321	0.0752322	0.0752322	0.0752322	0.0752322	0.0752322	0.0752322	0.0752322	0.0752322	0.0752322	0.0752322	0.0752322	0.0752322	0.0752322	0.0752322	0.0752322	0.0752322	0.0752322	0.0752322	0.0752322	0.0752322	0.0752322	0.0752322	0.0752322	0.0752322	0.0752322	0.0752322	0.0752322	0.0752322	0.0752322	0.0752322	0.0752322	0.0752322	0.0752322	0.0752322	0.0752322	0.0752322	0.0752322	0.0752322	0.0752322	0.0752322	0.0752322	0.0752322	0.0752322	0.0752322	0.0752322	0.0752322
Neuron_253	0.0592747	0.0592509	0.0592555	0.0592554	0.0592554	0.0592554	0.0592554	0.0592554	0.0592554	0.0592554	0.0592554	0.0592554	0.0592554	0.0592554	0.0592554	0.0592554	0.0592554	0.0592554	0.0592554	0.0592554	0.0592554	0.0592554	0.0592554	0.0592554	0.0592554	0.0592554	0.0592554	0.0592554	0.0592554	0.0592554	0.0592554	0.0592554	0.0592554	0.0592554	0.0592554	0.0592554	0.0592554	0.0592554	0.0592554	0.0592554	0.0592554	0.0592554	0.0592554	0.0592554	0.0592554	0.0592554	0.0592554	0.0592554	0.0592554
Neuron_254	0.0501042	0.0493701	0.0493691	0.0493691	0.0493691	0.0493691	0.0493691	0.0493691	0.0493691	0.0493691	0.0493691	0.0493691	0.0493691	0.0493691	0.0493691	0.0493691	0.0493691	0.0493691	0.0493691	0.0493691	0.0493691	0.0493691	0.0493691	0.0493691	0.0493691	0.0493691	0.0493691	0.0493691	0.0493691	0.0493691	0.0493691	0.0493691	0.0493691	0.0493691	0.0493691	0.0493691	0.0493691	0.0493691	0.0493691	0.0493691	0.0493691	0.0493691	0.0493691	0.0493691	0.0493691	0.0493691	0.0493691	0.0493691	0.0493691
Neuron_255	0.0675747	0.0686313	0.0686279	0.0686279	0.0686279	0.0686279	0.0686279	0.0686279	0.0686279	0.0686279	0.0686279	0.0686279	0.0686279	0.0686279	0.0686279	0.0686279	0.0686279	0.0686279	0.0686279	0.0686279	0.0686279	0.0686279	0.0686279	0.0686279	0.0686279	0.0686279	0.0686279	0.0686279	0.0686279	0.0686279	0.0686279	0.0686279	0.0686279	0.0686279	0.0686279	0.0686279	0.0686279	0.0686279	0.0686279	0.0686279	0.0686279	0.0686279	0.0686279	0.0686279	0.0686279	0.0686279	0.0686279	0.0686279	0.0686279
[truncated: 2 more columns]

## Sheet: u2
	Epoch_0	Epoch_1	Epoch_2	Epoch_3	Epoch_4	Epoch_5	Epoch_6	Epoch_7	Epoch_8	Epoch_9	Epoch_10	Epoch_11	Epoch_12	Epoch_13	Epoch_14	Epoch_15	Epoch_16	Epoch_17	Epoch_18	Epoch_19	Epoch_20	Epoch_21	Epoch_22	Epoch_23	Epoch_24	Epoch_25	Epoch_26	Epoch_27	Epoch_28	Epoch_29	Epoch_30	Epoch_31	Epoch_32	Epoch_33	Epoch_34	Epoch_35	Epoch_36	Epoch_37	Epoch_38	Epoch_39	Epoch_40	Epoch_41	Epoch_42	Epoch_43	Epoch_44	Epoch_45	Epoch_46	Epoch_47	Epoch_48
Neuron_0	0.0572131	0.0612117	0.0576783	0.0588318	0.0587339	0.0587284	0.0587264	0.0587282	0.0587276	0.0587276	0.0587276	0.0587276	0.0587276	0.0587276	0.0587276	0.0587276	0.0587276	0.0587276	0.0587276	0.0587276	0.0587276	0.0587276	0.0587276	0.0587276	0.0587276	0.0587276	0.0587276	0.0587276	0.0587276	0.0587276	0.0587276	0.0587276	0.0587276	0.0587276	0.0587276	0.0587276	0.0587276	0.0587276	0.0587276	0.0587276	0.0587276	0.0587276	0.0587276	0.0587276	0.0587276	0.0587276	0.0587276	0.0587276	0.0587276
Neuron_1	0.0703064	0.0687621	0.06695	0.0686435	0.0689943	0.0689055	0.0688805	0.0688807	0.0688812	0.0688814	0.0688814	0.0688814	0.0688814	0.0688814	0.0688814	0.0688814	0.0688814	0.0688814	0.0688814	0.0688814	0.0688814	0.0688814	0.0688814	0.0688814	0.0688814	0.0688814	0.0688814	0.0688814	0.0688814	0.0688814	0.0688814	0.0688814	0.0688814	0.0688814	0.0688814	0.0688814	0.0688814	0.0688814	0.0688814	0.0688814	0.0688814	0.0688814	0.0688814	0.0688814	0.0688814	0.0688814	0.0688814	0.0688814	0.0688814
Neuron_2	0.0500219	0.0649652	0.0667554	0.0669452	0.0671478	0.0671104	0.0671163	0.0671167	0.0671165	0.0671164	0.0671164	0.0671164	0.0671164	0.0671164	0.0671164	0.0671164	0.0671164	0.0671164	0.0671164	0.0671164	0.0671164	0.0671164	0.0671164	0.0671164	0.0671164	0.0671164	0.0671164	0.0671164	0.0671164	0.0671164	0.0671164	0.0671164	0.0671164	0.0671164	0.0671164	0.0671164	0.0671164	0.0671164	0.0671164	0.0671164	0.0671164	0.0671164	0.0671164	0.0671164	0.0671164	0.0671164	0.0671164	0.0671164	0.0671164
Neuron_3	0.0262518	0.0410071	0.0363619	0.0344864	0.0346575	0.0346372	0.0346443	0.0346425	0.0346422	0.0346421	0.0346421	0.0346421	0.0346421	0.0346421	0.0346421	0.0346421	0.0346421	0.0346421	0.0346421	0.0346421	0.0346421	0.0346421	0.0346421	0.0346421	0.0346421	0.0346421	0.0346421	0.0346421	0.0346421	0.0346421	0.0346421	0.0346421	0.0346421	0.0346421	0.0346421	0.0346421	0.0346421	0.0346421	0.0346421	0.0346421	0.0346421	0.0346421	0.0346421	0.0346421	0.0346421	0.0346421	0.0346421	0.0346421	0.0346421
Neuron_4	0.0320256	0.0311895	0.0282417	0.0294986	0.0298907	0.029869	0.0298507	0.0298514	0.029852	0.0298519	0.0298518	0.0298518	0.0298518	0.0298518	0.0298518	0.0298518	0.0298518	0.0298518	0.0298518	0.0298518	0.0298518	0.0298518	0.0298518	0.0298518	0.0298518	0.0298518	0.0298518	0.0298518	0.0298518	0.0298518	0.0298518	0.0298518	0.0298518	0.0298518	0.0298518	0.0298518	0.0298518	0.0298518	0.0298518	0.0298518	0.0298518	0.0298518	0.0298518	0.0298518	0.0298518	0.0298518	0.0298518	0.0298518	0.0298518
Neuron_5	0.0545517	0.0327175	0.0402376	0.0407011	0.0406287	0.0406184	0.0406203	0.0406204	0.0406215	0.0406215	0.0406215	0.0406215	0.0406215	0.0406215	0.0406215	0.0406215	0.0406215	0.0406215	0.0406215	0.0406215	0.0406215	0.0406215	0.0406215	0.0406215	0.0406215	0.0406215	0.0406215	0.0406215	0.0406215	0.0406215	0.0406215	0.0406215	0.0406215	0.0406215	0.0406215	0.0406215	0.0406215	0.0406215	0.0406215	0.0406215	0.0406215	0.0406215	0.0406215	0.0406215	0.0406215	0.0406215	0.0406215	0.0406215	0.0406215
Neuron_6	0.0248831	0.0329723	0.0301816	0.0306936	0.0308191	0.0308437	0.0308394	0.0308372	0.030837	0.0308372	0.0308372	0.0308372	0.0308372	0.0308372	0.0308372	0.0308372	0.0308372	0.0308372	0.0308372	0.0308372	0.0308372	0.0308372	0.0308372	0.0308372	0.0308372	0.0308372	0.0308372	0.0308372	0.0308372	0.0308372	0.0308372	0.0308372	0.0308372	0.0308372	0.0308372	0.0308372	0.0308372	0.0308372	0.0308372	0.0308372	0.0308372	0.0308372	0.0308372	0.0308372	0.0308372	0.0308372	0.0308372	0.0308372	0.0308372
Neuron_7	0.0652487	0.0537194	0.0537131	0.0545648	0.0545264	0.0545237	0.0545248	0.0545239	0.0545238	0.0545238	0.0545238	0.0545238	0.0545238	0.0545238	0.0545238	0.0545238	0.0545238	0.0545238	0.0545238	0.0545238	0.0545238	0.0545238	0.0545238	0.0545238	0.0545238	0.0545238	0.0545238	0.0545238	0.0545238	0.0545238	0.0545238	0.0545238	0.0545238	0.0545238	0.0545238	0.0545238	0.0545238	0.0545238	0.0545238	0.0545238	0.0545238	0.0545238	0.0545238	0.0545238	0.0545238	0.0545238	0.0545238	0.0545238	0.0545238
Neuron_8	0.0893687	0.096107	0.0940469	0.0966665	0.0963819	0.0963694	0.0963715	0.0963748	0.096376	0.0963757	0.0963757	0.0963757	0.0963757	0.0963757	0.0963757	0.0963757	0.0963757	0.0963757	0.0963757	0.0963757	0.0963757	0.0963757	0.0963757	0.0963757	0.0963757	0.0963757	0.0963757	0.0963757	0.0963757	0.0963757	0.0963757	0.0963757	0.0963757	0.0963757	0.0963757	0.0963757	0.0963757	0.0963757	0.0963757	0.0963757	0.0963757	0.0963757	0.0963757	0.0963757	0.0963757	0.0963757	0.0963757	0.0963757	0.0963757
Neuron_9	0.092266	0.091115	0.0922366	0.0915202	0.0915071	0.0915306	0.0915222	0.091521	0.0915206	0.0915207	0.0915207	0.0915207	0.0915207	0.0915207	0.0915207	0.0915207	0.0915207	0.0915207	0.0915207	0.0915207	0.0915207	0.0915207	0.0915207	0.0915207	0.0915207	0.0915207	0.0915207	0.0915207	0.0915207	0.0915207	0.0915207	0.0915207	0.0915207	0.0915207	0.0915207	0.0915207	0.0915207	0.0915207	0.0915207	0.0915207	0.0915207	0.0915207	0.0915207	0.0915207	0.0915207	0.0915207	0.0915207	0.0915207	0.0915207
Neuron_10	0.0051861	0.00530964	0.0046817	0.00347972	0.00385608	0.00390697	0.00390352	0.00390752	0.00390736	0.00390726	0.00390724	0.00390725	0.00390725	0.00390725	0.00390725	0.00390725	0.00390725	0.00390725	0.00390725	0.00390725	0.00390725	0.00390725	0.00390725	0.00390725	0.00390725	0.00390725	0.00390725	0.00390725	0.00390725	0.00390725	0.00390725	0.00390725	0.00390725	0.00390725	0.00390725	0.00390725	0.00390725	0.00390725	0.00390725	0.00390725	0.00390725	0.00390725	0.00390725	0.00390725	0.00390725	0.00390725	0.00390725	0.00390725	0.00390725
Neuron_11	0.0450024	0.0459145	0.0430597	0.0430392	0.0430933	0.0430335	0.0430276	0.0430278	0.0430278	0.0430279	0.0430279	0.0430279	0.0430279	0.0430279	0.0430279	0.0430279	0.0430279	0.0430279	0.0430279	0.0430279	0.0430279	0.0430279	0.0430279	0.0430279	0.0430279	0.0430279	0.0430279	0.0430279	0.0430279	0.0430279	0.0430279	0.0430279	0.0430279	0.0430279	0.0430279	0.0430279	0.0430279	0.0430279	0.0430279	0.0430279	0.0430279	0.0430279	0.0430279	0.0430279	0.0430279	0.0430279	0.0430279	0.0430279	0.0430279
Neuron_12	0.0352063	0.0270271	0.0272395	0.0271483	0.0275157	0.0275349	0.0275159	0.0275143	0.0275144	0.0275146	0.0275147	0.0275147	0.0275147	0.0275147	0.0275147	0.0275147	0.0275147	0.0275147	0.0275147	0.0275147	0.0275147	0.0275147	0.0275147	0.0275147	0.0275147	0.0275147	0.0275147	0.0275147	0.0275147	0.0275147	0.0275147	0.0275147	0.0275147	0.0275147	0.0275147	0.0275147	0.0275147	0.0275147	0.0275147	0.0275147	0.0275147	0.0275147	0.0275147	0.0275147	0.0275147	0.0275147	0.0275147	0.0275147	0.0275147
Neuron_13	0.0129691	0.00811416	0.00663816	0.00698294	0.0070485	0.00701463	0.00700361	0.0070073	0.00700853	0.00700834	0.00700837	0.00700838	0.00700838	0.00700838	0.00700838	0.00700838	0.00700838	0.00700838	0.00700838	0.00700838	0.00700838	0.00700838	0.00700838	0.00700838	0.00700838	0.00700838	0.00700838	0.00700838	0.00700838	0.00700838	0.00700838	0.00700838	0.00700838	0.00700838	0.00700838	0.00700838	0.00700838	0.00700838	0.00700838	0.00700838	0.00700838	0.00700838	0.00700838	0.00700838	0.00700838	0.00700838	0.00700838	0.00700838	0.00700838
Neuron_14	0.0320114	0.0119281	0.0188483	0.0184328	0.018518	0.0185372	0.0185329	0.0185358	0.0185364	0.0185365	0.0185365	0.0185365	0.0185365	0.0185365	0.0185365	0.0185365	0.0185365	0.0185365	0.0185365	0.0185365	0.0185365	0.0185365	0.0185365	0.0185365	0.0185365	0.0185365	0.0185365	0.0185365	0.0185365	0.0185365	0.0185365	0.0185365	0.0185365	0.0185365	0.0185365	0.0185365	0.0185365	0.0185365	0.0185365	0.0185365	0.0185365	0.0185365	0.0185365	0.0185365	0.0185365	0.0185365	0.0185365	0.0185365	0.0185365
Neuron_15	0.000719578	0.0173421	0.0191156	0.0184398	0.018373	0.0182656	0.0182496	0.0182521	0.0182529	0.0182528	0.0182528	0.0182528	0.0182528	0.0182528	0.0182528	0.0182528	0.0182528	0.0182528	0.0182528	0.0182528	0.0182528	0.0182528	0.0182528	0.0182528	0.0182528	0.0182528	0.0182528	0.0182528	0.0182528	0.0182528	0.0182528	0.0182528	0.0182528	0.0182528	0.0182528	0.0182528	0.0182528	0.0182528	0.0182528	0.0182528	0.0182528	0.0182528	0.0182528	0.0182528	0.0182528	0.0182528	0.0182528	0.0182528	0.0182528
Neuron_16	0.073325	0.0987181	0.093528	0.0932845	0.0933336	0.0933367	0.0933467	0.0933451	0.0933455	0.0933454	0.0933454	0.0933454	0.0933454	0.0933454	0.0933454	0.0933454	0.0933454	0.0933454	0.0933454	0.0933454	0.0933454	0.0933454	0.0933454	0.0933454	0.0933454	0.0933454	0.0933454	0.0933454	0.0933454	0.0933454	0.0933454	0.0933454	0.0933454	0.0933454	0.0933454	0.0933454	0.0933454	0.0933454	0.0933454	0.0933454	0.0933454	0.0933454	0.0933454	0.0933454	0.0933454	0.0933454	0.0933454	0.0933454	0.0933454
Neuron_17	0.0244026	0.0147007	0.0180046	0.0176918	0.0174953	0.0175212	0.0175193	0.0175157	0.017515	0.0175152	0.0175152	0.0175152	0.0175152	0.0175152	0.0175152	0.0175152	0.0175152	0.0175152	0.0175152	0.0175152	0.0175152	0.0175152	0.0175152	0.0175152	0.0175152	0.0175152	0.0175152	0.0175152	0.0175152	0.0175152	0.0175152	0.0175152	0.0175152	0.0175152	0.0175152	0.0175152	0.0175152	0.0175152	0.0175152	0.0175152	0.0175152	0.0175152	0.0175152	0.0175152	0.0175152	0.0175152	0.0175152	0.0175152	0.0175152
Neuron_18	0.0359355	0.0318898	0.0370446	0.0350688	0.034809	0.0347825	0.0347879	0.03479	0.0347896	0.0347895	0.0347895	0.0347895	0.0347895	0.0347895	0.0347895	0.0347895	0.0347895	0.0347895	0.0347895	0.0347895	0.0347895	0.0347895	0.0347895	0.0347895	0.0347895	0.0347895	0.0347895	0.0347895	0.0347895	0.0347895	0.0347895	0.0347895	0.0347895	0.0347895	0.0347895	0.0347895	0.0347895	0.0347895	0.0347895	0.0347895	0.0347895	0.0347895	0.0347895	0.0347895	0.0347895	0.0347895	0.0347895	0.0347895	0.0347895
Neuron_19	0.0542686	0.0579035	0.0612765	0.0613641	0.0613641	0.0613807	0.0613718	0.0613682	0.0613679	0.0613682	0.0613682	0.0613682	0.0613682	0.0613682	0.0613682	0.0613682	0.0613682	0.0613682	0.0613682	0.0613682	0.0613682	0.0613682	0.0613682	0.0613682	0.0613682	0.0613682	0.0613682	0.0613682	0.0613682	0.0613682	0.0613682	0.0613682	0.0613682	0.0613682	0.0613682	0.0613682	0.0613682	0.0613682	0.0613682	0.0613682	0.0613682	0.0613682	0.0613682	0.0613682	0.0613682	0.0613682	0.0613682	0.0613682	0.0613682
Neuron_20	0.0449554	0.0364492	0.0380944	0.0385908	0.038245	0.038227	0.0382388	0.0382415	0.0382417	0.0382415	0.0382415	0.0382415	0.0382415	0.0382415	0.0382415	0.0382415	0.0382415	0.0382415	0.0382415	0.0382415	0.0382415	0.0382415	0.0382415	0.0382415	0.0382415	0.0382415	0.0382415	0.0382415	0.0382415	0.0382415	0.0382415	0.0382415	0.0382415	0.0382415	0.0382415	0.0382415	0.0382415	0.0382415	0.0382415	0.0382415	0.0382415	0.0382415	0.0382415	0.0382415	0.0382415	0.0382415	0.0382415	0.0382415	0.0382415
Neuron_21	0.0929487	0.0864017	0.0817723	0.0818248	0.0816273	0.081726	0.0817271	0.0817266	0.0817263	0.0817263	0.0817263	0.0817264	0.0817264	0.0817264	0.0817264	0.0817264	0.0817264	0.0817264	0.0817264	0.0817264	0.0817264	0.0817264	0.0817264	0.0817264	0.0817264	0.0817264	0.0817264	0.0817264	0.0817264	0.0817264	0.0817264	0.0817264	0.0817264	0.0817264	0.0817264	0.0817264	0.0817264	0.0817264	0.0817264	0.0817264	0.0817264	0.0817264	0.0817264	0.0817264	0.0817264	0.0817264	0.0817264	0.0817264	0.0817264
Neuron_22	0.0180584	0.0193819	0.0139186	0.0136478	0.013444	0.0134946	0.0135085	0.0135025	0.0135028	0.0135028	0.0135029	0.0135029	0.0135029	0.0135029	0.0135029	0.0135029	0.0135029	0.0135029	0.0135029	0.0135029	0.0135029	0.0135029	0.0135029	0.0135029	0.0135029	0.0135029	0.0135029	0.0135029	0.0135029	0.0135029	0.0135029	0.0135029	0.0135029	0.0135029	0.0135029	0.0135029	0.0135029	0.0135029	0.0135029	0.0135029	0.0135029	0.0135029	0.0135029	0.0135029	0.0135029	0.0135029	0.0135029	0.0135029	0.0135029
Neuron_23	0.00465138	0.0106128	0.00758985	0.00795584	0.00775368	0.00780506	0.00782082	0.00781829	0.00781852	0.00781846	0.00781848	0.00781849	0.00781849	0.00781849	0.00781849	0.00781849	0.00781849	0.00781849	0.00781849	0.00781849	0.00781849	0.00781849	0.00781849	0.00781849	0.00781849	0.00781849	0.00781849	0.00781849	0.00781849	0.00781849	0.00781849	0.00781849	0.00781849	0.00781849	0.00781849	0.00781849	0.00781849	0.00781849	0.00781849	0.00781849	0.00781849	0.00781849	0.00781849	0.00781849	0.00781849	0.00781849	0.00781849	0.00781849	0.00781849
Neuron_24	0.0217714	0.038887	0.0383389	0.0376284	0.0371668	0.0371231	0.0371381	0.0371381	0.0371387	0.0371388	0.0371387	0.0371388	0.0371388	0.0371388	0.0371388	0.0371388	0.0371388	0.0371388	0.0371388	0.0371388	0.0371388	0.0371388	0.0371388	0.0371388	0.0371388	0.0371388	0.0371388	0.0371388	0.0371388	0.0371388	0.0371388	0.0371388	0.0371388	0.0371388	0.0371388	0.0371388	0.0371388	0.0371388	0.0371388	0.0371388	0.0371388	0.0371388	0.0371388	0.0371388	0.0371388	0.0371388	0.0371388	0.0371388	0.0371388
Neuron_25	0.0156708	0.0354562	0.0381711	0.0376512	0.0378719	0.0378527	0.0378649	0.037861	0.0378608	0.0378609	0.0378609	0.0378609	0.0378609	0.0378609	0.0378609	0.0378609	0.0378609	0.0378609	0.0378609	0.0378609	0.0378609	0.0378609	0.0378609	0.0378609	0.0378609	0.0378609	0.0378609	0.0378609	0.0378609	0.0378609	0.0378609	0.0378609	0.0378609	0.0378609	0.0378609	0.0378609	0.0378609	0.0378609	0.0378609	0.0378609	0.0378609	0.0378609	0.0378609	0.0378609	0.0378609	0.0378609	0.0378609	0.0378609	0.0378609
Neuron_26	0.0121732	0.00922392	0.00822131	0.00627981	0.00629177	0.00634967	0.00634346	0.00634419	0.00634502	0.00634495	0.00634496	0.00634496	0.00634496	0.00634496	0.00634496	0.00634496	0.00634496	0.00634496	0.00634496	0.00634496	0.00634496	0.00634496	0.00634496	0.00634496	0.00634496	0.00634496	0.00634496	0.00634496	0.00634496	0.00634496	0.00634496	0.00634496	0.00634496	0.00634496	0.00634496	0.00634496	0.00634496	0.00634496	0.00634496	0.00634496	0.00634496	0.00634496	0.00634496	0.00634496	0.00634496	0.00634496	0.00634496	0.00634496	0.00634496
Neuron_27	0.0240407	0.0257934	0.0254635	0.0237562	0.0240053	0.0240312	0.0240263	0.0240245	0.0240243	0.0240243	0.0240243	0.0240243	0.0240243	0.0240243	0.0240243	0.0240243	0.0240243	0.0240243	0.0240243	0.0240243	0.0240243	0.0240243	0.0240243	0.0240243	0.0240243	0.0240243	0.0240243	0.0240243	0.0240243	0.0240243	0.0240243	0.0240243	0.0240243	0.0240243	0.0240243	0.0240243	0.0240243	0.0240243	0.0240243	0.0240243	0.0240243	0.0240243	0.0240243	0.0240243	0.0240243	0.0240243	0.0240243	0.0240243	0.0240243
Neuron_28	0.0732004	0.0828446	0.0837326	0.08387	0.0838669	0.0838745	0.0838773	0.083879	0.0838785	0.0838786	0.0838786	0.0838786	0.0838786	0.0838786	0.0838786	0.0838786	0.0838786	0.0838786	0.0838786	0.0838786	0.0838786	0.0838786	0.0838786	0.0838786	0.0838786	0.0838786	0.0838786	0.0838786	0.0838786	0.0838786	0.0838786	0.0838786	0.0838786	0.0838786	0.0838786	0.0838786	0.0838786	0.0838786	0.0838786	0.0838786	0.0838786	0.0838786	0.0838786	0.0838786	0.0838786	0.0838786	0.0838786	0.0838786	0.0838786
Neuron_29	0.0427892	0.0756606	0.0799153	0.0796484	0.0792934	0.0793142	0.079336	0.0793412	0.0793412	0.0793408	0.0793408	0.0793408	0.0793408	0.0793408	0.0793408	0.0793408	0.0793408	0.0793408	0.0793408	0.0793408	0.0793408	0.0793408	0.0793408	0.0793408	0.0793408	0.0793408	0.0793408	0.0793408	0.0793408	0.0793408	0.0793408	0.0793408	0.0793408	0.0793408	0.0793408	0.0793408	0.0793408	0.0793408	0.0793408	0.0793408	0.0793408	0.0793408	0.0793408	0.0793408	0.0793408	0.0793408	0.0793408	0.0793408	0.0793408
Neuron_30	0.0828848	0.0849705	0.0837142	0.0839168	0.0839067	0.0838573	0.0838596	0.0838661	0.0838666	0.0838665	0.0838665	0.0838665	0.0838665	0.0838665	0.0838665	0.0838665	0.0838665	0.0838665	0.0838665	0.0838665	0.0838665	0.0838665	0.0838665	0.0838665	0.0838665	0.0838665	0.0838665	0.0838665	0.0838665	0.0838665	0.0838665	0.0838665	0.0838665	0.0838665	0.0838665	0.0838665	0.0838665	0.0838665	0.0838665	0.0838665	0.0838665	0.0838665	0.0838665	0.0838665	0.0838665	0.0838665	0.0838665	0.0838665	0.0838665
Neuron_31	0.0647032	0.0661646	0.0629568	0.0620249	0.0617361	0.061719	0.0617352	0.0617405	0.061741	0.0617409	0.0617408	0.0617408	0.0617408	0.0617408	0.0617408	0.0617408	0.0617408	0.0617408	0.0617408	0.0617408	0.0617408	0.0617408	0.0617408	0.0617408	0.0617408	0.0617408	0.0617408	0.0617408	0.0617408	0.0617408	0.0617408	0.0617408	0.0617408	0.0617408	0.0617408	0.0617408	0.0617408	0.0617408	0.0617408	0.0617408	0.0617408	0.0617408	0.0617408	0.0617408	0.0617408	0.0617408	0.0617408	0.0617408	0.0617408
Neuron_32	0.0398803	0.0368357	0.0360655	0.0365897	0.0363915	0.0363623	0.0363648	0.0363669	0.0363664	0.0363664	0.0363664	0.0363664	0.0363664	0.0363664	0.0363664	0.0363664	0.0363664	0.0363664	0.0363664	0.0363664	0.0363664	0.0363664	0.0363664	0.0363664	0.0363664	0.0363664	0.0363664	0.0363664	0.0363664	0.0363664	0.0363664	0.0363664	0.0363664	0.0363664	0.0363664	0.0363664	0.0363664	0.0363664	0.0363664	0.0363664	0.0363664	0.0363664	0.0363664	0.0363664	0.0363664	0.0363664	0.0363664	0.0363664	0.0363664
Neuron_33	0.00947119	0.0153255	0.0144651	0.0147081	0.0145463	0.0144128	0.0144003	0.0144015	0.0144034	0.0144036	0.0144035	0.0144035	0.0144035	0.0144035	0.0144035	0.0144035	0.0144035	0.0144035	0.0144035	0.0144035	0.0144035	0.0144035	0.0144035	0.0144035	0.0144035	0.0144035	0.0144035	0.0144035	0.0144035	0.0144035	0.0144035	0.0144035	0.0144035	0.0144035	0.0144035	0.0144035	0.0144035	0.0144035	0.0144035	0.0144035	0.0144035	0.0144035	0.0144035	0.0144035	0.0144035	0.0144035	0.0144035	0.0144035	0.0144035
Neuron_34	0.0928516	0.0949932	0.0912297	0.0916203	0.0917206	0.0917453	0.0917527	0.0917461	0.0917454	0.0917454	0.0917455	0.0917455	0.0917455	0.0917455	0.0917455	0.0917455	0.0917455	0.0917455	0.0917455	0.0917455	0.0917455	0.0917455	0.0917455	0.0917455	0.0917455	0.0917455	0.0917455	0.0917455	0.0917455	0.0917455	0.0917455	0.0917455	0.0917455	0.0917455	0.0917455	0.0917455	0.0917455	0.0917455	0.0917455	0.0917455	0.0917455	0.0917455	0.0917455	0.0917455	0.0917455	0.0917455	0.0917455	0.0917455	0.0917455
Neuron_35	0.0264144	0.00122008	0.00260406	0.00240892	0.0021532	0.00219458	0.00219076	0.00218973	0.00218928	0.00218917	0.00218917	0.00218916	0.00218916	0.00218916	0.00218916	0.00218916	0.00218916	0.00218916	0.00218916	0.00218916	0.00218916	0.00218916	0.00218916	0.00218916	0.00218916	0.00218916	0.00218916	0.00218916	0.00218916	0.00218916	0.00218916	0.00218916	0.00218916	0.00218916	0.00218916	0.00218916	0.00218916	0.00218916	0.00218916	0.00218916	0.00218916	0.00218916	0.00218916	0.00218916	0.00218916	0.00218916	0.00218916	0.00218916	0.00218916
Neuron_36	0.0516185	0.0642347	0.0682166	0.0670761	0.0669972	0.0669837	0.067005	0.0670045	0.0670042	0.0670042	0.0670041	0.0670041	0.0670041	0.0670041	0.0670041	0.0670041	0.0670041	0.0670041	0.0670041	0.0670041	0.0670041	0.0670041	0.0670041	0.0670041	0.0670041	0.0670041	0.0670041	0.0670041	0.0670041	0.0670041	0.0670041	0.0670041	0.0670041	0.0670041	0.0670041	0.0670041	0.0670041	0.0670041	0.0670041	0.0670041	0.0670041	0.0670041	0.0670041	0.0670041	0.0670041	0.0670041	0.0670041	0.0670041	0.0670041
Neuron_37	0.0369169	0.0453032	0.0463826	0.0463838	0.0465062	0.0464912	0.0464938	0.0464959	0.0464961	0.0464958	0.0464958	0.0464958	0.0464958	0.0464958	0.0464958	0.0464958	0.0464958	0.0464958	0.0464958	0.0464958	0.0464958	0.0464958	0.0464958	0.0464958	0.0464958	0.0464958	0.0464958	0.0464958	0.0464958	0.0464958	0.0464958	0.0464958	0.0464958	0.0464958	0.0464958	0.0464958	0.0464958	0.0464958	0.0464958	0.0464958	0.0464958	0.0464958	0.0464958	0.0464958	0.0464958	0.0464958	0.0464958	0.0464958	0.0464958
Neuron_38	0.0400579	0.0371545	0.0369557	0.0361957	0.0360877	0.0360733	0.0360697	0.0360673	0.0360672	0.0360673	0.0360673	0.0360673	0.0360673	0.0360673	0.0360673	0.0360673	0.0360673	0.0360673	0.0360673	0.0360673	0.0360673	0.0360673	0.0360673	0.0360673	0.0360673	0.0360673	0.0360673	0.0360673	0.0360673	0.0360673	0.0360673	0.0360673	0.0360673	0.0360673	0.0360673	0.0360673	0.0360673	0.0360673	0.0360673	0.0360673	0.0360673	0.0360673	0.0360673	0.0360673	0.0360673	0.0360673	0.0360673	0.0360673	0.0360673
Neuron_39	0.0612747	0.0847164	0.081032	0.0805334	0.0805459	0.0806102	0.0806264	0.0806259	0.080626	0.0806261	0.0806261	0.0806261	0.0806261	0.0806261	0.0806261	0.0806261	0.0806261	0.0806261	0.0806261	0.0806261	0.0806261	0.0806261	0.0806261	0.0806261	0.0806261	0.0806261	0.0806261	0.0806261	0.0806261	0.0806261	0.0806261	0.0806261	0.0806261	0.0806261	0.0806261	0.0806261	0.0806261	0.0806261	0.0806261	0.0806261	0.0806261	0.0806261	0.0806261	0.0806261	0.0806261	0.0806261	0.0806261	0.0806261	0.0806261
Neuron_40	0.0139675	0.00553854	0.00576863	0.00539173	0.00538363	0.00535283	0.00534863	0.00534706	0.00534637	0.0053465	0.00534655	0.00534654	0.00534654	0.00534654	0.00534654	0.00534654	0.00534654	0.00534654	0.00534654	0.00534654	0.00534654	0.00534654	0.00534654	0.00534654	0.00534654	0.00534654	0.00534654	0.00534654	0.00534654	0.00534654	0.00534654	0.00534654	0.00534654	0.00534654	0.00534654	0.00534654	0.00534654	0.00534654	0.00534654	0.00534654	0.00534654	0.00534654	0.00534654	0.00534654	0.00534654	0.00534654	0.00534654	0.00534654	0.00534654
Neuron_41	0.0520417	0.0370974	0.0336002	0.033325	0.0336574	0.0336838	0.0336739	0.033671	0.033671	0.033671	0.033671	0.033671	0.033671	0.033671	0.033671	0.033671	0.033671	0.033671	0.033671	0.033671	0.033671	0.033671	0.033671	0.033671	0.033671	0.033671	0.033671	0.033671	0.033671	0.033671	0.033671	0.033671	0.033671	0.033671	0.033671	0.033671	0.033671	0.033671	0.033671	0.033671	0.033671	0.033671	0.033671	0.033671	0.033671	0.033671	0.033671	0.033671	0.033671
Neuron_42	0.00100278	0.00248973	0.00709139	0.00754975	0.00752366	0.00750755	0.00752682	0.0075255	0.00752526	0.00752522	0.00752521	0.00752522	0.00752521	0.00752521	0.00752521	0.00752521	0.00752521	0.00752521	0.00752521	0.00752521	0.00752521	0.00752521	0.00752521	0.00752521	0.00752521	0.00752521	0.00752521	0.00752521	0.00752521	0.00752521	0.00752521	0.00752521	0.00752521	0.00752521	0.00752521	0.00752521	0.00752521	0.00752521	0.00752521	0.00752521	0.00752521	0.00752521	0.00752521	0.00752521	0.00752521	0.00752521	0.00752521	0.00752521	0.00752521
Neuron_43	0.020159	0.0394073	0.0325017	0.0321395	0.0318116	0.0318322	0.0318457	0.031845	0.0318447	0.0318444	0.0318445	0.0318445	0.0318445	0.0318445	0.0318445	0.0318445	0.0318445	0.0318445	0.0318445	0.0318445	0.0318445	0.0318445	0.0318445	0.0318445	0.0318445	0.0318445	0.0318445	0.0318445	0.0318445	0.0318445	0.0318445	0.0318445	0.0318445	0.0318445	0.0318445	0.0318445	0.0318445	0.0318445	0.0318445	0.0318445	0.0318445	0.0318445	0.0318445	0.0318445	0.0318445	0.0318445	0.0318445	0.0318445	0.0318445
Neuron_44	0.0877631	0.0985263	0.097449	0.0972962	0.0972794	0.0972139	0.0972061	0.0972068	0.097207	0.0972069	0.0972069	0.0972069	0.0972069	0.0972069	0.0972069	0.0972069	0.0972069	0.0972069	0.0972069	0.0972069	0.0972069	0.0972069	0.0972069	0.0972069	0.0972069	0.0972069	0.0972069	0.0972069	0.0972069	0.0972069	0.0972069	0.0972069	0.0972069	0.0972069	0.0972069	0.0972069	0.0972069	0.0972069	0.0972069	0.0972069	0.0972069	0.0972069	0.0972069	0.0972069	0.0972069	0.0972069	0.0972069	0.0972069	0.0972069
Neuron_45	0.0323671	0.0254067	0.024393	0.0245812	0.0247611	0.0247918	0.0247936	0.0247895	0.0247897	0.0247899	0.0247899	0.0247899	0.0247899	0.0247899	0.0247899	0.0247899	0.0247899	0.0247899	0.0247899	0.0247899	0.0247899	0.0247899	0.0247899	0.0247899	0.0247899	0.0247899	0.0247899	0.0247899	0.0247899	0.0247899	0.0247899	0.0247899	0.0247899	0.0247899	0.0247899	0.0247899	0.0247899	0.0247899	0.0247899	0.0247899	0.0247899	0.0247899	0.0247899	0.0247899	0.0247899	0.0247899	0.0247899	0.0247899	0.0247899
Neuron_46	0.0334965	0.032121	0.0311637	0.0312087	0.0316792	0.0316588	0.0316472	0.0316436	0.0316441	0.0316442	0.0316442	0.0316442	0.0316442	0.0316442	0.0316442	0.0316442	0.0316442	0.0316442	0.0316442	0.0316442	0.0316442	0.0316442	0.0316442	0.0316442	0.0316442	0.0316442	0.0316442	0.0316442	0.0316442	0.0316442	0.0316442	0.0316442	0.0316442	0.0316442	0.0316442	0.0316442	0.0316442	0.0316442	0.0316442	0.0316442	0.0316442	0.0316442	0.0316442	0.0316442	0.0316442	0.0316442	0.0316442	0.0316442	0.0316442
Neuron_47	0.0765083	0.0761146	0.078383	0.0779563	0.0778562	0.0778881	0.0778911	0.0778882	0.0778887	0.0778887	0.0778887	0.0778887	0.0778887	0.0778887	0.0778887	0.0778887	0.0778887	0.0778887	0.0778887	0.0778887	0.0778887	0.0778887	0.0778887	0.0778887	0.0778887	0.0778887	0.0778887	0.0778887	0.0778887	0.0778887	0.0778887	0.0778887	0.0778887	0.0778887	0.0778887	0.0778887	0.0778887	0.0778887	0.0778887	0.0778887	0.0778887	0.0778887	0.0778887	0.0778887	0.0778887	0.0778887	0.0778887	0.0778887	0.0778887
Neuron_48	0.068255	0.0803367	0.0781689	0.0787173	0.0788252	0.0787964	0.0788001	0.0787996	0.0787995	0.0787996	0.0787996	0.0787996	0.0787996	0.0787996	0.0787996	0.0787996	0.0787996	0.0787996	0.0787996	0.0787996	0.0787996	0.0787996	0.0787996	0.0787996	0.0787996	0.0787996	0.0787996	0.0787996	0.0787996	0.0787996	0.0787996	0.0787996	0.0787996	0.0787996	0.0787996	0.0787996	0.0787996	0.0787996	0.0787996	0.0787996	0.0787996	0.0787996	0.0787996	0.0787996	0.0787996	0.0787996	0.0787996	0.0787996	0.0787996
Neuron_49	0.0356617	0.0462592	0.0435185	0.0440634	0.043858	0.0438785	0.0438883	0.0438867	0.043887	0.0438869	0.0438869	0.0438869	0.0438869	0.0438869	0.0438869	0.0438869	0.0438869	0.0438869	0.0438869	0.0438869	0.0438869	0.0438869	0.0438869	0.0438869	0.0438869	0.0438869	0.0438869	0.0438869	0.0438869	0.0438869	0.0438869	0.0438869	0.0438869	0.0438869	0.0438869	0.0438869	0.0438869	0.0438869	0.0438869	0.0438869	0.0438869	0.0438869	0.0438869	0.0438869	0.0438869	0.0438869	0.0438869	0.0438869	0.0438869
Neuron_50	0.0928484	0.0830453	0.0815392	0.0822246	0.0820578	0.0820761	0.0820803	0.0820838	0.082084	0.0820837	0.0820837	0.0820837	0.0820837	0.0820837	0.0820837	0.0820837	0.0820837	0.0820837	0.0820837	0.0820837	0.0820837	0.0820837	0.0820837	0.0820837	0.0820837	0.0820837	0.0820837	0.0820837	0.0820837	0.0820837	0.0820837	0.0820837	0.0820837	0.0820837	0.0820837	0.0820837	0.0820837	0.0820837	0.0820837	0.0820837	0.0820837	0.0820837	0.0820837	0.0820837	0.0820837	0.0820837	0.0820837	0.0820837	0.0820837
Neuron_51	0.0401369	0.0143824	0.0133443	0.013436	0.0132029	0.0131792	0.0131714	0.0131762	0.013176	0.0131759	0.013176	0.013176	0.013176	0.013176	0.013176	0.013176	0.013176	0.013176	0.013176	0.013176	0.013176	0.013176	0.013176	0.013176	0.013176	0.013176	0.013176	0.013176	0.013176	0.013176	0.013176	0.013176	0.013176	0.013176	0.013176	0.013176	0.013176	0.013176	0.013176	0.013176	0.013176	0.013176	0.013176	0.013176	0.013176	0.013176	0.013176	0.013176	0.013176
Neuron_52	0.0714433	0.0661794	0.0616609	0.0604357	0.0606854	0.0606908	0.0606884	0.0606845	0.060685	0.0606851	0.0606851	0.0606851	0.0606851	0.0606851	0.0606851	0.0606851	0.0606851	0.0606851	0.0606851	0.0606851	0.0606851	0.0606851	0.0606851	0.0606851	0.0606851	0.0606851	0.0606851	0.0606851	0.0606851	0.0606851	0.0606851	0.0606851	0.0606851	0.0606851	0.0606851	0.0606851	0.0606851	0.0606851	0.0606851	0.0606851	0.0606851	0.0606851	0.0606851	0.0606851	0.0606851	0.0606851	0.0606851	0.0606851	0.0606851
Neuron_53	0.0514548	0.0536612	0.0538109	0.0544036	0.0546944	0.054681	0.0546613	0.0546625	0.0546623	0.0546625	0.0546625	0.0546625	0.0546625	0.0546625	0.0546625	0.0546625	0.0546625	0.0546625	0.0546625	0.0546625	0.0546625	0.0546625	0.0546625	0.0546625	0.0546625	0.0546625	0.0546625	0.0546625	0.0546625	0.0546625	0.0546625	0.0546625	0.0546625	0.0546625	0.0546625	0.0546625	0.0546625	0.0546625	0.0546625	0.0546625	0.0546625	0.0546625	0.0546625	0.0546625	0.0546625	0.0546625	0.0546625	0.0546625	0.0546625
Neuron_54	0.0777056	0.0738874	0.0795787	0.0799891	0.0801706	0.0801478	0.0801439	0.0801433	0.0801436	0.0801437	0.0801436	0.0801436	0.0801436	0.0801436	0.0801436	0.0801436	0.0801436	0.0801436	0.0801436	0.0801436	0.0801436	0.0801436	0.0801436	0.0801436	0.0801436	0.0801436	0.0801436	0.0801436	0.0801436	0.0801436	0.0801436	0.0801436	0.0801436	0.0801436	0.0801436	0.0801436	0.0801436	0.0801436	0.0801436	0.0801436	0.0801436	0.0801436	0.0801436	0.0801436	0.0801436	0.0801436	0.0801436	0.0801436	0.0801436
Neuron_55	0.0283687	0.0339164	0.0346874	0.0347477	0.0347189	0.034654	0.034652	0.0346485	0.0346491	0.0346491	0.0346491	0.0346491	0.0346491	0.0346491	0.0346491	0.0346491	0.0346491	0.0346491	0.0346491	0.0346491	0.0346491	0.0346491	0.0346491	0.0346491	0.0346491	0.0346491	0.0346491	0.0346491	0.0346491	0.0346491	0.0346491	0.0346491	0.0346491	0.0346491	0.0346491	0.0346491	0.0346491	0.0346491	0.0346491	0.0346491	0.0346491	0.0346491	0.0346491	0.0346491	0.0346491	0.0346491	0.0346491	0.0346491	0.0346491
Neuron_56	0.00230524	0.00629422	0.00270346	0.00298328	0.00281878	0.00285054	0.00282453	0.00282656	0.00282664	0.0028267	0.00282679	0.00282677	0.00282677	0.00282677	0.00282677	0.00282677	0.00282677	0.00282677	0.00282677	0.00282677	0.00282677	0.00282677	0.00282677	0.00282677	0.00282677	0.00282677	0.00282677	0.00282677	0.00282677	0.00282677	0.00282677	0.00282677	0.00282677	0.00282677	0.00282677	0.00282677	0.00282677	0.00282677	0.00282677	0.00282677	0.00282677	0.00282677	0.00282677	0.00282677	0.00282677	0.00282677	0.00282677	0.00282677	0.00282677
Neuron_57	0.0692513	0.0511827	0.0470489	0.0473568	0.0473101	0.0473171	0.0473078	0.0473057	0.0473061	0.0473062	0.0473063	0.0473063	0.0473063	0.0473063	0.0473063	0.0473063	0.0473063	0.0473063	0.0473063	0.0473063	0.0473063	0.0473063	0.0473063	0.0473063	0.0473063	0.0473063	0.0473063	0.0473063	0.0473063	0.0473063	0.0473063	0.0473063	0.0473063	0.0473063	0.0473063	0.0473063	0.0473063	0.0473063	0.0473063	0.0473063	0.0473063	0.0473063	0.0473063	0.0473063	0.0473063	0.0473063	0.0473063	0.0473063	0.0473063
Neuron_58	0.01521	0.0157624	0.0100798	0.00934797	0.00918172	0.00917057	0.00917406	0.0091784	0.00917793	0.00917771	0.00917772	0.00917773	0.00917774	0.00917774	0.00917774	0.00917774	0.00917774	0.00917774	0.00917774	0.00917774	0.00917774	0.00917774	0.00917774	0.00917774	0.00917774	0.00917774	0.00917774	0.00917774	0.00917774	0.00917774	0.00917774	0.00917774	0.00917774	0.00917774	0.00917774	0.00917774	0.00917774	0.00917774	0.00917774	0.00917774	0.00917774	0.00917774	0.00917774	0.00917774	0.00917774	0.00917774	0.00917774	0.00917774	0.00917774
Neuron_59	0.0629995	0.0700995	0.0717474	0.0719948	0.0717537	0.0717554	0.0717645	0.0717611	0.0717598	0.0717598	0.0717599	0.0717599	0.0717599	0.0717599	0.0717599	0.0717599	0.0717599	0.0717599	0.0717599	0.0717599	0.0717599	0.0717599	0.0717599	0.0717599	0.0717599	0.0717599	0.0717599	0.0717599	0.0717599	0.0717599	0.0717599	0.0717599	0.0717599	0.0717599	0.0717599	0.0717599	0.0717599	0.0717599	0.0717599	0.0717599	0.0717599	0.0717599	0.0717599	0.0717599	0.0717599	0.0717599	0.0717599	0.0717599	0.0717599
Neuron_60	0.0188472	0.00445331	0.00257036	0.00243796	0.00279925	0.00275105	0.00275932	0.00276221	0.00276218	0.00276219	0.00276215	0.00276216	0.00276216	0.00276216	0.00276216	0.00276216	0.00276216	0.00276216	0.00276216	0.00276216	0.00276216	0.00276216	0.00276216	0.00276216	0.00276216	0.00276216	0.00276216	0.00276216	0.00276216	0.00276216	0.00276216	0.00276216	0.00276216	0.00276216	0.00276216	0.00276216	0.00276216	0.00276216	0.00276216	0.00276216	0.00276216	0.00276216	0.00276216	0.00276216	0.00276216	0.00276216	0.00276216	0.00276216	0.00276216
Neuron_61	0.00826972	0.00613572	0.00917956	0.00925657	0.00909916	0.00912568	0.00914417	0.00914318	0.00914291	0.00914282	0.00914281	0.00914281	0.00914282	0.00914282	0.00914282	0.00914282	0.00914282	0.00914282	0.00914282	0.00914282	0.00914282	0.00914282	0.00914282	0.00914282	0.00914282	0.00914282	0.00914282	0.00914282	0.00914282	0.00914282	0.00914282	0.00914282	0.00914282	0.00914282	0.00914282	0.00914282	0.00914282	0.00914282	0.00914282	0.00914282	0.00914282	0.00914282	0.00914282	0.00914282	0.00914282	0.00914282	0.00914282	0.00914282	0.00914282
Neuron_62	0.0843174	0.0852819	0.0865216	0.0869244	0.0869451	0.086972	0.0869568	0.0869566	0.0869585	0.0869583	0.0869583	0.0869583	0.0869583	0.0869583	0.0869583	0.0869583	0.0869583	0.0869583	0.0869583	0.0869583	0.0869583	0.0869583	0.0869583	0.0869583	0.0869583	0.0869583	0.0869583	0.0869583	0.0869583	0.0869583	0.0869583	0.0869583	0.0869583	0.0869583	0.0869583	0.0869583	0.0869583	0.0869583	0.0869583	0.0869583	0.0869583	0.0869583	0.0869583	0.0869583	0.0869583	0.0869583	0.0869583	0.0869583	0.0869583
Neuron_63	0.0731165	0.0483594	0.0517326	0.0513187	0.0513144	0.0513785	0.0513747	0.0513756	0.0513754	0.0513753	0.0513753	0.0513753	0.0513753	0.0513753	0.0513753	0.0513753	0.0513753	0.0513753	0.0513753	0.0513753	0.0513753	0.0513753	0.0513753	0.0513753	0.0513753	0.0513753	0.0513753	0.0513753	0.0513753	0.0513753	0.0513753	0.0513753	0.0513753	0.0513753	0.0513753	0.0513753	0.0513753	0.0513753	0.0513753	0.0513753	0.0513753	0.0513753	0.0513753	0.0513753	0.0513753	0.0513753	0.0513753	0.0513753	0.0513753
Neuron_64	0.0892863	0.10426	0.105874	0.106804	0.106837	0.106722	0.106714	0.106717	0.106718	0.106718	0.106718	0.106718	0.106718	0.106718	0.106718	0.106718	0.106718	0.106718	0.106718	0.106718	0.106718	0.106718	0.106718	0.106718	0.106718	0.106718	0.106718	0.106718	0.106718	0.106718	0.106718	0.106718	0.106718	0.106718	0.106718	0.106718	0.106718	0.106718	0.106718	0.106718	0.106718	0.106718	0.106718	0.106718	0.106718	0.106718	0.106718	0.106718	0.106718
Neuron_65	0.04855	0.0416508	0.0404096	0.0422375	0.0422909	0.0422856	0.0422779	0.04228	0.0422804	0.0422802	0.0422802	0.0422802	0.0422802	0.0422802	0.0422802	0.0422802	0.0422802	0.0422802	0.0422802	0.0422802	0.0422802	0.0422802	0.0422802	0.0422802	0.0422802	0.0422802	0.0422802	0.0422802	0.0422802	0.0422802	0.0422802	0.0422802	0.0422802	0.0422802	0.0422802	0.0422802	0.0422802	0.0422802	0.0422802	0.0422802	0.0422802	0.0422802	0.0422802	0.0422802	0.0422802	0.0422802	0.0422802	0.0422802	0.0422802
Neuron_66	0.00842575	0.00898696	0.0107828	0.0106651	0.0106275	0.0105905	0.0105841	0.0105862	0.0105856	0.0105857	0.0105857	0.0105857	0.0105857	0.0105857	0.0105857	0.0105857	0.0105857	0.0105857	0.0105857	0.0105857	0.0105857	0.0105857	0.0105857	0.0105857	0.0105857	0.0105857	0.0105857	0.0105857	0.0105857	0.0105857	0.0105857	0.0105857	0.0105857	0.0105857	0.0105857	0.0105857	0.0105857	0.0105857	0.0105857	0.0105857	0.0105857	0.0105857	0.0105857	0.0105857	0.0105857	0.0105857	0.0105857	0.0105857	0.0105857
Neuron_67	0.0919777	0.0819335	0.0755458	0.0750589	0.0750266	0.0750936	0.0750891	0.0750881	0.0750871	0.0750871	0.0750872	0.0750872	0.0750872	0.0750872	0.0750872	0.0750872	0.0750872	0.0750872	0.0750872	0.0750872	0.0750872	0.0750872	0.0750872	0.0750872	0.0750872	0.0750872	0.0750872	0.0750872	0.0750872	0.0750872	0.0750872	0.0750872	0.0750872	0.0750872	0.0750872	0.0750872	0.0750872	0.0750872	0.0750872	0.0750872	0.0750872	0.0750872	0.0750872	0.0750872	0.0750872	0.0750872	0.0750872	0.0750872	0.0750872
Neuron_68	0.0512818	0.0222568	0.0253451	0.0260358	0.0258752	0.0258017	0.0258257	0.0258235	0.0258234	0.0258236	0.0258235	0.0258235	0.0258235	0.0258235	0.0258235	0.0258235	0.0258235	0.0258235	0.0258235	0.0258235	0.0258235	0.0258235	0.0258235	0.0258235	0.0258235	0.0258235	0.0258235	0.0258235	0.0258235	0.0258235	0.0258235	0.0258235	0.0258235	0.0258235	0.0258235	0.0258235	0.0258235	0.0258235	0.0258235	0.0258235	0.0258235	0.0258235	0.0258235	0.0258235	0.0258235	0.0258235	0.0258235	0.0258235	0.0258235
Neuron_69	0.07485	0.0814485	0.0833312	0.0829377	0.0827418	0.082802	0.0828195	0.08282	0.0828197	0.0828197	0.0828197	0.0828197	0.0828197	0.0828197	0.0828197	0.0828197	0.0828197	0.0828197	0.0828197	0.0828197	0.0828197	0.0828197	0.0828197	0.0828197	0.0828197	0.0828197	0.0828197	0.0828197	0.0828197	0.0828197	0.0828197	0.0828197	0.0828197	0.0828197	0.0828197	0.0828197	0.0828197	0.0828197	0.0828197	0.0828197	0.0828197	0.0828197	0.0828197	0.0828197	0.0828197	0.0828197	0.0828197	0.0828197	0.0828197
Neuron_70	0.0939401	0.0915183	0.0910348	0.0900864	0.0902767	0.0902013	0.0901965	0.0902009	0.0902003	0.0902004	0.0902004	0.0902004	0.0902004	0.0902004	0.0902004	0.0902004	0.0902004	0.0902004	0.0902004	0.0902004	0.0902004	0.0902004	0.0902004	0.0902004	0.0902004	0.0902004	0.0902004	0.0902004	0.0902004	0.0902004	0.0902004	0.0902004	0.0902004	0.0902004	0.0902004	0.0902004	0.0902004	0.0902004	0.0902004	0.0902004	0.0902004	0.0902004	0.0902004	0.0902004	0.0902004	0.0902004	0.0902004	0.0902004	0.0902004
Neuron_71	0.0852218	0.0853323	0.0815753	0.0801705	0.0802922	0.0802786	0.0802916	0.0802929	0.0802935	0.0802932	0.0802933	0.0802933	0.0802933	0.0802933	0.0802933	0.0802933	0.0802933	0.0802933	0.0802933	0.0802933	0.0802933	0.0802933	0.0802933	0.0802933	0.0802933	0.0802933	0.0802933	0.0802933	0.0802933	0.0802933	0.0802933	0.0802933	0.0802933	0.0802933	0.0802933	0.0802933	0.0802933	0.0802933	0.0802933	0.0802933	0.0802933	0.0802933	0.0802933	0.0802933	0.0802933	0.0802933	0.0802933	0.0802933	0.0802933
Neuron_72	0.0851227	0.0760905	0.076953	0.0766327	0.0766038	0.0766356	0.0766363	0.0766349	0.0766346	0.0766346	0.0766345	0.0766345	0.0766345	0.0766345	0.0766345	0.0766345	0.0766345	0.0766345	0.0766345	0.0766345	0.0766345	0.0766345	0.0766345	0.0766345	0.0766345	0.0766345	0.0766345	0.0766345	0.0766345	0.0766345	0.0766345	0.0766345	0.0766345	0.0766345	0.0766345	0.0766345	0.0766345	0.0766345	0.0766345	0.0766345	0.0766345	0.0766345	0.0766345	0.0766345	0.0766345	0.0766345	0.0766345	0.0766345	0.0766345
Neuron_73	0.0411717	0.0354025	0.0368044	0.0373477	0.0371484	0.0371725	0.0371741	0.0371759	0.0371753	0.0371752	0.0371753	0.0371753	0.0371753	0.0371753	0.0371753	0.0371753	0.0371753	0.0371753	0.0371753	0.0371753	0.0371753	0.0371753	0.0371753	0.0371753	0.0371753	0.0371753	0.0371753	0.0371753	0.0371753	0.0371753	0.0371753	0.0371753	0.0371753	0.0371753	0.0371753	0.0371753	0.0371753	0.0371753	0.0371753	0.0371753	0.0371753	0.0371753	0.0371753	0.0371753	0.0371753	0.0371753	0.0371753	0.0371753	0.0371753
Neuron_74	0.0447741	0.0289495	0.0242786	0.0228018	0.0228108	0.0228027	0.0228033	0.0228018	0.0228011	0.022801	0.0228011	0.0228011	0.0228011	0.0228011	0.0228011	0.0228011	0.0228011	0.0228011	0.0228011	0.0228011	0.0228011	0.0228011	0.0228011	0.0228011	0.0228011	0.0228011	0.0228011	0.0228011	0.0228011	0.0228011	0.0228011	0.0228011	0.0228011	0.0228011	0.0228011	0.0228011	0.0228011	0.0228011	0.0228011	0.0228011	0.0228011	0.0228011	0.0228011	0.0228011	0.0228011	0.0228011	0.0228011	0.0228011	0.0228011
Neuron_75	0.097393	0.0815887	0.0818426	0.0819959	0.0817872	0.0817178	0.0817212	0.0817208	0.0817208	0.081721	0.081721	0.081721	0.081721	0.081721	0.081721	0.081721	0.081721	0.081721	0.081721	0.081721	0.081721	0.081721	0.081721	0.081721	0.081721	0.081721	0.081721	0.081721	0.081721	0.081721	0.081721	0.081721	0.081721	0.081721	0.081721	0.081721	0.081721	0.081721	0.081721	0.081721	0.081721	0.081721	0.081721	0.081721	0.081721	0.081721	0.081721	0.081721	0.081721
Neuron_76	0.0237745	0.00607672	0.00748671	0.00725389	0.00724289	0.0072421	0.00722937	0.00723123	0.00723158	0.00723158	0.00723158	0.00723159	0.00723159	0.00723159	0.00723159	0.00723159	0.00723159	0.00723159	0.00723159	0.00723159	0.00723159	0.00723159	0.00723159	0.00723159	0.00723159	0.00723159	0.00723159	0.00723159	0.00723159	0.00723159	0.00723159	0.00723159	0.00723159	0.00723159	0.00723159	0.00723159	0.00723159	0.00723159	0.00723159	0.00723159	0.00723159	0.00723159	0.00723159	0.00723159	0.00723159	0.00723159	0.00723159	0.00723159	0.00723159
Neuron_77	0.0893119	0.081715	0.0840969	0.0835608	0.0835644	0.0835213	0.0835381	0.0835394	0.0835402	0.0835401	0.08354	0.08354	0.08354	0.08354	0.08354	0.08354	0.08354	0.08354	0.08354	0.08354	0.08354	0.08354	0.08354	0.08354	0.08354	0.08354	0.08354	0.08354	0.08354	0.08354	0.08354	0.08354	0.08354	0.08354	0.08354	0.08354	0.08354	0.08354	0.08354	0.08354	0.08354	0.08354	0.08354	0.08354	0.08354	0.08354	0.08354	0.08354	0.08354
Neuron_78	0.0493709	0.0628478	0.0588895	0.0586833	0.0589973	0.0589435	0.0589446	0.0589403	0.0589405	0.0589404	0.0589404	0.0589404	0.0589404	0.0589404	0.0589404	0.0589404	0.0589404	0.0589404	0.0589404	0.0589404	0.0589404	0.0589404	0.0589404	0.0589404	0.0589404	0.0589404	0.0589404	0.0589404	0.0589404	0.0589404	0.0589404	0.0589404	0.0589404	0.0589404	0.0589404	0.0589404	0.0589404	0.0589404	0.0589404	0.0589404	0.0589404	0.0589404	0.0589404	0.0589404	0.0589404	0.0589404	0.0589404	0.0589404	0.0589404
Neuron_79	0.00113698	0.00143254	0.00108816	0.000501566	0.000299461	0.000267244	0.000269974	0.00026997	0.000270401	0.000270277	0.000270274	0.000270283	0.000270284	0.000270283	0.000270283	0.000270283	0.000270283	0.000270283	0.000270283	0.000270283	0.000270283	0.000270283	0.000270283	0.000270283	0.000270283	0.000270283	0.000270283	0.000270283	0.000270283	0.000270283	0.000270283	0.000270283	0.000270283	0.000270283	0.000270283	0.000270283	0.000270283	0.000270283	0.000270283	0.000270283	0.000270283	0.000270283	0.000270283	0.000270283	0.000270283	0.000270283	0.000270283	0.000270283	0.000270283
Neuron_80	0.000404503	0.0150462	0.017427	0.0175734	0.0176695	0.017718	0.0177244	0.0177206	0.0177208	0.0177207	0.0177208	0.0177208	0.0177208	0.0177208	0.0177208	0.0177208	0.0177208	0.0177208	0.0177208	0.0177208	0.0177208	0.0177208	0.0177208	0.0177208	0.0177208	0.0177208	0.0177208	0.0177208	0.0177208	0.0177208	0.0177208	0.0177208	0.0177208	0.0177208	0.0177208	0.0177208	0.0177208	0.0177208	0.0177208	0.0177208	0.0177208	0.0177208	0.0177208	0.0177208	0.0177208	0.0177208	0.0177208	0.0177208	0.0177208
Neuron_81	0.0877233	0.0841926	0.078773	0.0788495	0.0791269	0.0791144	0.0791109	0.0791106	0.0791101	0.0791102	0.0791102	0.0791102	0.0791102	0.0791102	0.0791102	0.0791102	0.0791102	0.0791102	0.0791102	0.0791102	0.0791102	0.0791102	0.0791102	0.0791102	0.0791102	0.0791102	0.0791102	0.0791102	0.0791102	0.0791102	0.0791102	0.0791102	0.0791102	0.0791102	0.0791102	0.0791102	0.0791102	0.0791102	0.0791102	0.0791102	0.0791102	0.0791102	0.0791102	0.0791102	0.0791102	0.0791102	0.0791102	0.0791102	0.0791102
Neuron_82	0.0266784	0.0409718	0.039552	0.0399935	0.0398595	0.039819	0.0398179	0.0398243	0.0398245	0.0398244	0.0398244	0.0398244	0.0398244	0.0398244	0.0398244	0.0398244	0.0398244	0.0398244	0.0398244	0.0398244	0.0398244	0.0398244	0.0398244	0.0398244	0.0398244	0.0398244	0.0398244	0.0398244	0.0398244	0.0398244	0.0398244	0.0398244	0.0398244	0.0398244	0.0398244	0.0398244	0.0398244	0.0398244	0.0398244	0.0398244	0.0398244	0.0398244	0.0398244	0.0398244	0.0398244	0.0398244	0.0398244	0.0398244	0.0398244
Neuron_83	0.0857147	0.11683	0.117487	0.118383	0.118699	0.118617	0.118597	0.118596	0.118598	0.118598	0.118598	0.118598	0.118598	0.118598	0.118598	0.118598	0.118598	0.118598	0.118598	0.118598	0.118598	0.118598	0.118598	0.118598	0.118598	0.118598	0.118598	0.118598	0.118598	0.118598	0.118598	0.118598	0.118598	0.118598	0.118598	0.118598	0.118598	0.118598	0.118598	0.118598	0.118598	0.118598	0.118598	0.118598	0.118598	0.118598	0.118598	0.118598	0.118598
Neuron_84	0.059693	0.0496854	0.0489655	0.0473258	0.0476642	0.0477385	0.0477289	0.0477244	0.0477247	0.0477249	0.047725	0.047725	0.047725	0.047725	0.047725	0.047725	0.047725	0.047725	0.047725	0.047725	0.047725	0.047725	0.047725	0.047725	0.047725	0.047725	0.047725	0.047725	0.047725	0.047725	0.047725	0.047725	0.047725	0.047725	0.047725	0.047725	0.047725	0.047725	0.047725	0.047725	0.047725	0.047725	0.047725	0.047725	0.047725	0.047725	0.047725	0.047725	0.047725
Neuron_85	0.0298227	0.0484297	0.0468797	0.0471165	0.0469593	0.0469662	0.0469761	0.0469788	0.0469788	0.0469788	0.0469788	0.0469788	0.0469788	0.0469788	0.0469788	0.0469788	0.0469788	0.0469788	0.0469788	0.0469788	0.0469788	0.0469788	0.0469788	0.0469788	0.0469788	0.0469788	0.0469788	0.0469788	0.0469788	0.0469788	0.0469788	0.0469788	0.0469788	0.0469788	0.0469788	0.0469788	0.0469788	0.0469788	0.0469788	0.0469788	0.0469788	0.0469788	0.0469788	0.0469788	0.0469788	0.0469788	0.0469788	0.0469788	0.0469788
Neuron_86	0.0415192	0.0468198	0.0517032	0.0507782	0.0508391	0.0508479	0.0508413	0.0508407	0.050841	0.050841	0.050841	0.050841	0.050841	0.050841	0.050841	0.050841	0.050841	0.050841	0.050841	0.050841	0.050841	0.050841	0.050841	0.050841	0.050841	0.050841	0.050841	0.050841	0.050841	0.050841	0.050841	0.050841	0.050841	0.050841	0.050841	0.050841	0.050841	0.050841	0.050841	0.050841	0.050841	0.050841	0.050841	0.050841	0.050841	0.050841	0.050841	0.050841	0.050841
Neuron_87	0.0344953	0.0368804	0.0364725	0.0350808	0.0351958	0.0351679	0.0351784	0.0351766	0.0351757	0.0351759	0.0351759	0.0351759	0.0351759	0.0351759	0.0351759	0.0351759	0.0351759	0.0351759	0.0351759	0.0351759	0.0351759	0.0351759	0.0351759	0.0351759	0.0351759	0.0351759	0.0351759	0.0351759	0.0351759	0.0351759	0.0351759	0.0351759	0.0351759	0.0351759	0.0351759	0.0351759	0.0351759	0.0351759	0.0351759	0.0351759	0.0351759	0.0351759	0.0351759	0.0351759	0.0351759	0.0351759	0.0351759	0.0351759	0.0351759
Neuron_88	0.0820811	0.0480081	0.0479431	0.0486947	0.0484934	0.0485433	0.0485348	0.0485344	0.0485349	0.048535	0.048535	0.048535	0.048535	0.048535	0.048535	0.048535	0.048535	0.048535	0.048535	0.048535	0.048535	0.048535	0.048535	0.048535	0.048535	0.048535	0.048535	0.048535	0.048535	0.048535	0.048535	0.048535	0.048535	0.048535	0.048535	0.048535	0.048535	0.048535	0.048535	0.048535	0.048535	0.048535	0.048535	0.048535	0.048535	0.048535	0.048535	0.048535	0.048535
Neuron_89	0.0981236	0.0838947	0.0833853	0.0831898	0.0832925	0.083317	0.0833083	0.083305	0.0833045	0.0833047	0.0833047	0.0833047	0.0833047	0.0833047	0.0833047	0.0833047	0.0833047	0.0833047	0.0833047	0.0833047	0.0833047	0.0833047	0.0833047	0.0833047	0.0833047	0.0833047	0.0833047	0.0833047	0.0833047	0.0833047	0.0833047	0.0833047	0.0833047	0.0833047	0.0833047	0.0833047	0.0833047	0.0833047	0.0833047	0.0833047	0.0833047	0.0833047	0.0833047	0.0833047	0.0833047	0.0833047	0.0833047	0.0833047	0.0833047
Neuron_90	0.071712	0.0616019	0.0573462	0.0573005	0.0573412	0.0572869	0.0573141	0.0573159	0.0573158	0.0573155	0.0573155	0.0573155	0.0573155	0.0573155	0.0573155	0.0573155	0.0573155	0.0573155	0.0573155	0.0573155	0.0573155	0.0573155	0.0573155	0.0573155	0.0573155	0.0573155	0.0573155	0.0573155	0.0573155	0.0573155	0.0573155	0.0573155	0.0573155	0.0573155	0.0573155	0.0573155	0.0573155	0.0573155	0.0573155	0.0573155	0.0573155	0.0573155	0.0573155	0.0573155	0.0573155	0.0573155	0.0573155	0.0573155	0.0573155
Neuron_91	0.0875407	0.094887	0.0951833	0.0960816	0.0958242	0.0958497	0.0958444	0.0958451	0.0958462	0.0958461	0.095846	0.095846	0.0958461	0.0958461	0.0958461	0.0958461	0.0958461	0.0958461	0.0958461	0.0958461	0.0958461	0.0958461	0.0958461	0.0958461	0.0958461	0.0958461	0.0958461	0.0958461	0.0958461	0.0958461	0.0958461	0.0958461	0.0958461	0.0958461	0.0958461	0.0958461	0.0958461	0.0958461	0.0958461	0.0958461	0.0958461	0.0958461	0.0958461	0.0958461	0.0958461	0.0958461	0.0958461	0.0958461	0.0958461
Neuron_92	0.0477794	0.0559843	0.0551798	0.0548568	0.0547739	0.0547199	0.0547397	0.0547423	0.0547418	0.0547419	0.0547419	0.0547419	0.0547419	0.0547419	0.0547419	0.0547419	0.0547419	0.0547419	0.0547419	0.0547419	0.0547419	0.0547419	0.0547419	0.0547419	0.0547419	0.0547419	0.0547419	0.0547419	0.0547419	0.0547419	0.0547419	0.0547419	0.0547419	0.0547419	0.0547419	0.0547419	0.0547419	0.0547419	0.0547419	0.0547419	0.0547419	0.0547419	0.0547419	0.0547419	0.0547419	0.0547419	0.0547419	0.0547419	0.0547419
Neuron_93	0.0845756	0.0912371	0.0899168	0.089314	0.0896339	0.0896432	0.0896701	0.0896745	0.0896737	0.0896737	0.0896737	0.0896737	0.0896737	0.0896737	0.0896737	0.0896737	0.0896737	0.0896737	0.0896737	0.0896737	0.0896737	0.0896737	0.0896737	0.0896737	0.0896737	0.0896737	0.0896737	0.0896737	0.0896737	0.0896737	0.0896737	0.0896737	0.0896737	0.0896737	0.0896737	0.0896737	0.0896737	0.0896737	0.0896737	0.0896737	0.0896737	0.0896737	0.0896737	0.0896737	0.0896737	0.0896737	0.0896737	0.0896737	0.0896737
Neuron_94	0.00417845	0.00213375	0.00815351	0.00804069	0.00807697	0.0080725	0.00809375	0.00809805	0.00809763	0.00809743	0.00809743	0.00809744	0.00809744	0.00809744	0.00809744	0.00809744	0.00809744	0.00809744	0.00809744	0.00809744	0.00809744	0.00809744	0.00809744	0.00809744	0.00809744	0.00809744	0.00809744	0.00809744	0.00809744	0.00809744	0.00809744	0.00809744	0.00809744	0.00809744	0.00809744	0.00809744	0.00809744	0.00809744	0.00809744	0.00809744	0.00809744	0.00809744	0.00809744	0.00809744	0.00809744	0.00809744	0.00809744	0.00809744	0.00809744
Neuron_95	0.0159037	0.0177877	0.0178769	0.0181971	0.0181503	0.0181651	0.0181766	0.0181778	0.0181765	0.0181764	0.0181764	0.0181764	0.0181764	0.0181764	0.0181764	0.0181764	0.0181764	0.0181764	0.0181764	0.0181764	0.0181764	0.0181764	0.0181764	0.0181764	0.0181764	0.0181764	0.0181764	0.0181764	0.0181764	0.0181764	0.0181764	0.0181764	0.0181764	0.0181764	0.0181764	0.0181764	0.0181764	0.0181764	0.0181764	0.0181764	0.0181764	0.0181764	0.0181764	0.0181764	0.0181764	0.0181764	0.0181764	0.0181764	0.0181764
Neuron_96	0.0159328	0.00834329	0.00855464	0.00824667	0.00791468	0.00797214	0.00798228	0.00797966	0.00797949	0.00797935	0.00797935	0.00797935	0.00797935	0.00797935	0.00797935	0.00797935	0.00797935	0.00797935	0.00797935	0.00797935	0.00797935	0.00797935	0.00797935	0.00797935	0.00797935	0.00797935	0.00797935	0.00797935	0.00797935	0.00797935	0.00797935	0.00797935	0.00797935	0.00797935	0.00797935	0.00797935	0.00797935	0.00797935	0.00797935	0.00797935	0.00797935	0.00797935	0.00797935	0.00797935	0.00797935	0.00797935	0.00797935	0.00797935	0.00797935
Neuron_97	0.00250279	0.0194479	0.0142757	0.0144049	0.0143714	0.0143513	0.0143528	0.0143577	0.0143568	0.0143566	0.0143566	0.0143566	0.0143566	0.0143566	0.0143566	0.0143566	0.0143566	0.0143566	0.0143566	0.0143566	0.0143566	0.0143566	0.0143566	0.0143566	0.0143566	0.0143566	0.0143566	0.0143566	0.0143566	0.0143566	0.0143566	0.0143566	0.0143566	0.0143566	0.0143566	0.0143566	0.0143566	0.0143566	0.0143566	0.0143566	0.0143566	0.0143566	0.0143566	0.0143566	0.0143566	0.0143566	0.0143566	0.0143566	0.0143566
Neuron_98	0.0703507	0.0697899	0.0663429	0.0660546	0.0661592	0.0661225	0.0661291	0.0661326	0.0661317	0.0661318	0.0661319	0.0661319	0.0661319	0.0661319	0.0661319	0.0661319	0.0661319	0.0661319	0.0661319	0.0661319	0.0661319	0.0661319	0.0661319	0.0661319	0.0661319	0.0661319	0.0661319	0.0661319	0.0661319	0.0661319	0.0661319	0.0661319	0.0661319	0.0661319	0.0661319	0.0661319	0.0661319	0.0661319	0.0661319	0.0661319	0.0661319	0.0661319	0.0661319	0.0661319	0.0661319	0.0661319	0.0661319	0.0661319	0.0661319
Neuron_99	0.0509205	0.0489552	0.0504239	0.0519004	0.0518903	0.0518577	0.0518466	0.0518485	0.0518489	0.0518488	0.0518488	0.0518488	0.0518488	0.0518488	0.0518488	0.0518488	0.0518488	0.0518488	0.0518488	0.0518488	0.0518488	0.0518488	0.0518488	0.0518488	0.0518488	0.0518488	0.0518488	0.0518488	0.0518488	0.0518488	0.0518488	0.0518488	0.0518488	0.0518488	0.0518488	0.0518488	0.0518488	0.0518488	0.0518488	0.0518488	0.0518488	0.0518488	0.0518488	0.0518488	0.0518488	0.0518488	0.0518488	0.0518488	0.0518488
Neuron_100	0.023297	0.0212007	0.0200069	0.0194779	0.0195406	0.0195377	0.0195417	0.0195413	0.0195409	0.019541	0.0195409	0.0195409	0.0195409	0.0195409	0.0195409	0.0195409	0.0195409	0.0195409	0.0195409	0.0195409	0.0195409	0.0195409	0.0195409	0.0195409	0.0195409	0.0195409	0.0195409	0.0195409	0.0195409	0.0195409	0.0195409	0.0195409	0.0195409	0.0195409	0.0195409	0.0195409	0.0195409	0.0195409	0.0195409	0.0195409	0.0195409	0.0195409	0.0195409	0.0195409	0.0195409	0.0195409	0.0195409	0.0195409	0.0195409
Neuron_101	0.0274917	0.0147319	0.0100235	0.00934123	0.0090738	0.00908743	0.00909705	0.00909956	0.009099	0.00909873	0.00909872	0.00909874	0.00909874	0.00909874	0.00909874	0.00909874	0.00909874	0.00909874	0.00909874	0.00909874	0.00909874	0.00909874	0.00909874	0.00909874	0.00909874	0.00909874	0.00909874	0.00909874	0.00909874	0.00909874	0.00909874	0.00909874	0.00909874	0.00909874	0.00909874	0.00909874	0.00909874	0.00909874	0.00909874	0.00909874	0.00909874	0.00909874	0.00909874	0.00909874	0.00909874	0.00909874	0.00909874	0.00909874	0.00909874
Neuron_102	0.00747894	0.00872159	0.00120199	0.00134582	0.00148721	0.00153231	0.00152237	0.00152049	0.00152039	0.00152038	0.00152038	0.00152036	0.00152036	0.00152036	0.00152036	0.00152036	0.00152036	0.00152036	0.00152036	0.00152036	0.00152036	0.00152036	0.00152036	0.00152036	0.00152036	0.00152036	0.00152036	0.00152036	0.00152036	0.00152036	0.00152036	0.00152036	0.00152036	0.00152036	0.00152036	0.00152036	0.00152036	0.00152036	0.00152036	0.00152036	0.00152036	0.00152036	0.00152036	0.00152036	0.00152036	0.00152036	0.00152036	0.00152036	0.00152036
Neuron_103	0.0688077	0.058568	0.0562658	0.054776	0.0547792	0.0547922	0.0547841	0.0547803	0.0547812	0.0547814	0.0547814	0.0547814	0.0547814	0.0547814	0.0547814	0.0547814	0.0547814	0.0547814	0.0547814	0.0547814	0.0547814	0.0547814	0.0547814	0.0547814	0.0547814	0.0547814	0.0547814	0.0547814	0.0547814	0.0547814	0.0547814	0.0547814	0.0547814	0.0547814	0.0547814	0.0547814	0.0547814	0.0547814	0.0547814	0.0547814	0.0547814	0.0547814	0.0547814	0.0547814	0.0547814	0.0547814	0.0547814	0.0547814	0.0547814
Neuron_104	0.0942301	0.0904939	0.0874073	0.0877587	0.0877973	0.0878128	0.0877937	0.0877901	0.0877901	0.08779	0.08779	0.08779	0.08779	0.08779	0.08779	0.08779	0.08779	0.08779	0.08779	0.08779	0.08779	0.08779	0.08779	0.08779	0.08779	0.08779	0.08779	0.08779	0.08779	0.08779	0.08779	0.08779	0.08779	0.08779	0.08779	0.08779	0.08779	0.08779	0.08779	0.08779	0.08779	0.08779	0.08779	0.08779	0.08779	0.08779	0.08779	0.08779	0.08779
Neuron_105	0.0336321	0.0241699	0.0256956	0.0261235	0.026128	0.0261277	0.0261138	0.0261177	0.0261162	0.026116	0.026116	0.026116	0.026116	0.026116	0.026116	0.026116	0.026116	0.026116	0.026116	0.026116	0.026116	0.026116	0.026116	0.026116	0.026116	0.026116	0.026116	0.026116	0.026116	0.026116	0.026116	0.026116	0.026116	0.026116	0.026116	0.026116	0.026116	0.026116	0.026116	0.026116	0.026116	0.026116	0.026116	0.026116	0.026116	0.026116	0.026116	0.026116	0.026116
Neuron_106	0.0571794	0.0538961	0.0536533	0.0528522	0.0529009	0.0529382	0.0529374	0.0529342	0.0529355	0.0529356	0.0529355	0.0529355	0.0529355	0.0529355	0.0529355	0.0529355	0.0529355	0.0529355	0.0529355	0.0529355	0.0529355	0.0529355	0.0529355	0.0529355	0.0529355	0.0529355	0.0529355	0.0529355	0.0529355	0.0529355	0.0529355	0.0529355	0.0529355	0.0529355	0.0529355	0.0529355	0.0529355	0.0529355	0.0529355	0.0529355	0.0529355	0.0529355	0.0529355	0.0529355	0.0529355	0.0529355	0.0529355	0.0529355	0.0529355
Neuron_107	0.0270859	0.00048607	0.00118815	0.00257189	0.00260822	0.00263884	0.0026497	0.0026459	0.002646	0.00264601	0.00264598	0.00264599	0.00264598	0.00264599	0.00264599	0.00264599	0.00264599	0.00264599	0.00264599	0.00264599	0.00264599	0.00264599	0.00264599	0.00264599	0.00264599	0.00264599	0.00264599	0.00264599	0.00264599	0.00264599	0.00264599	0.00264599	0.00264599	0.00264599	0.00264599	0.00264599	0.00264599	0.00264599	0.00264599	0.00264599	0.00264599	0.00264599	0.00264599	0.00264599	0.00264599	0.00264599	0.00264599	0.00264599	0.00264599
Neuron_108	0.0573618	0.0746999	0.0690599	0.0679849	0.0681998	0.0682656	0.0682683	0.0682662	0.0682655	0.0682654	0.0682655	0.0682655	0.0682655	0.0682655	0.0682655	0.0682655	0.0682655	0.0682655	0.0682655	0.0682655	0.0682655	0.0682655	0.0682655	0.0682655	0.0682655	0.0682655	0.0682655	0.0682655	0.0682655	0.0682655	0.0682655	0.0682655	0.0682655	0.0682655	0.0682655	0.0682655	0.0682655	0.0682655	0.0682655	0.0682655	0.0682655	0.0682655	0.0682655	0.0682655	0.0682655	0.0682655	0.0682655	0.0682655	0.0682655
Neuron_109	0.0536342	0.0394846	0.0387581	0.0383452	0.0384444	0.0384523	0.0384468	0.0384474	0.0384464	0.0384463	0.0384463	0.0384463	0.0384463	0.0384463	0.0384463	0.0384463	0.0384463	0.0384463	0.0384463	0.0384463	0.0384463	0.0384463	0.0384463	0.0384463	0.0384463	0.0384463	0.0384463	0.0384463	0.0384463	0.0384463	0.0384463	0.0384463	0.0384463	0.0384463	0.0384463	0.0384463	0.0384463	0.0384463	0.0384463	0.0384463	0.0384463	0.0384463	0.0384463	0.0384463	0.0384463	0.0384463	0.0384463	0.0384463	0.0384463
Neuron_110	0.0367426	0.0187422	0.019342	0.0195249	0.019337	0.0193307	0.0193398	0.0193434	0.0193434	0.0193431	0.0193431	0.0193431	0.0193431	0.0193431	0.0193431	0.0193431	0.0193431	0.0193431	0.0193431	0.0193431	0.0193431	0.0193431	0.0193431	0.0193431	0.0193431	0.0193431	0.0193431	0.0193431	0.0193431	0.0193431	0.0193431	0.0193431	0.0193431	0.0193431	0.0193431	0.0193431	0.0193431	0.0193431	0.0193431	0.0193431	0.0193431	0.0193431	0.0193431	0.0193431	0.0193431	0.0193431	0.0193431	0.0193431	0.0193431
Neuron_111	0.0607308	0.0392266	0.0404116	0.039329	0.0393015	0.0393442	0.0393553	0.0393542	0.0393544	0.0393544	0.0393544	0.0393544	0.0393544	0.0393544	0.0393544	0.0393544	0.0393544	0.0393544	0.0393544	0.0393544	0.0393544	0.0393544	0.0393544	0.0393544	0.0393544	0.0393544	0.0393544	0.0393544	0.0393544	0.0393544	0.0393544	0.0393544	0.0393544	0.0393544	0.0393544	0.0393544	0.0393544	0.0393544	0.0393544	0.0393544	0.0393544	0.0393544	0.0393544	0.0393544	0.0393544	0.0393544	0.0393544	0.0393544	0.0393544
Neuron_112	0.0990631	0.0843256	0.0856514	0.0857266	0.0856148	0.0855935	0.0855941	0.0855932	0.0855933	0.0855934	0.0855935	0.0855935	0.0855935	0.0855935	0.0855935	0.0855935	0.0855935	0.0855935	0.0855935	0.0855935	0.0855935	0.0855935	0.0855935	0.0855935	0.0855935	0.0855935	0.0855935	0.0855935	0.0855935	0.0855935	0.0855935	0.0855935	0.0855935	0.0855935	0.0855935	0.0855935	0.0855935	0.0855935	0.0855935	0.0855935	0.0855935	0.0855935	0.0855935	0.0855935	0.0855935	0.0855935	0.0855935	0.0855935	0.0855935
Neuron_113	0.0293062	0.0327285	0.0316458	0.0301076	0.0300903	0.0300544	0.0300541	0.0300556	0.030056	0.030056	0.0300559	0.0300559	0.0300559	0.0300559	0.0300559	0.0300559	0.0300559	0.0300559	0.0300559	0.0300559	0.0300559	0.0300559	0.0300559	0.0300559	0.0300559	0.0300559	0.0300559	0.0300559	0.0300559	0.0300559	0.0300559	0.0300559	0.0300559	0.0300559	0.0300559	0.0300559	0.0300559	0.0300559	0.0300559	0.0300559	0.0300559	0.0300559	0.0300559	0.0300559	0.0300559	0.0300559	0.0300559	0.0300559	0.0300559
Neuron_114	0.0388611	0.0631683	0.0587773	0.05804	0.0580372	0.0580761	0.0580841	0.0580843	0.0580831	0.0580831	0.0580832	0.0580832	0.0580832	0.0580832	0.0580832	0.0580832	0.0580832	0.0580832	0.0580832	0.0580832	0.0580832	0.0580832	0.0580832	0.0580832	0.0580832	0.0580832	0.0580832	0.0580832	0.0580832	0.0580832	0.0580832	0.0580832	0.0580832	0.0580832	0.0580832	0.0580832	0.0580832	0.0580832	0.0580832	0.0580832	0.0580832	0.0580832	0.0580832	0.0580832	0.0580832	0.0580832	0.0580832	0.0580832	0.0580832
Neuron_115	0.0912819	0.0988496	0.0982315	0.0991887	0.0988759	0.0988485	0.09886	0.0988644	0.098863	0.0988631	0.0988631	0.0988631	0.0988631	0.0988631	0.0988631	0.0988631	0.0988631	0.0988631	0.0988631	0.0988631	0.0988631	0.0988631	0.0988631	0.0988631	0.0988631	0.0988631	0.0988631	0.0988631	0.0988631	0.0988631	0.0988631	0.0988631	0.0988631	0.0988631	0.0988631	0.0988631	0.0988631	0.0988631	0.0988631	0.0988631	0.0988631	0.0988631	0.0988631	0.0988631	0.0988631	0.0988631	0.0988631	0.0988631	0.0988631
Neuron_116	0.094372	0.0981839	0.102977	0.102421	0.102255	0.102204	0.102194	0.102195	0.102196	0.102196	0.102196	0.102196	0.102196	0.102196	0.102196	0.102196	0.102196	0.102196	0.102196	0.102196	0.102196	0.102196	0.102196	0.102196	0.102196	0.102196	0.102196	0.102196	0.102196	0.102196	0.102196	0.102196	0.102196	0.102196	0.102196	0.102196	0.102196	0.102196	0.102196	0.102196	0.102196	0.102196	0.102196	0.102196	0.102196	0.102196	0.102196	0.102196	0.102196
Neuron_117	0.0697896	0.088614	0.0909792	0.0908747	0.0906575	0.0907126	0.0906978	0.0906947	0.0906945	0.0906948	0.0906947	0.0906947	0.0906947	0.0906947	0.0906947	0.0906947	0.0906947	0.0906947	0.0906947	0.0906947	0.0906947	0.0906947	0.0906947	0.0906947	0.0906947	0.0906947	0.0906947	0.0906947	0.0906947	0.0906947	0.0906947	0.0906947	0.0906947	0.0906947	0.0906947	0.0906947	0.0906947	0.0906947	0.0906947	0.0906947	0.0906947	0.0906947	0.0906947	0.0906947	0.0906947	0.0906947	0.0906947	0.0906947	0.0906947
Neuron_118	0.0454394	0.0569532	0.0577383	0.0568591	0.0568335	0.0568437	0.0568359	0.0568325	0.0568321	0.056832	0.0568321	0.0568321	0.0568321	0.0568321	0.0568321	0.0568321	0.0568321	0.0568321	0.0568321	0.0568321	0.0568321	0.0568321	0.0568321	0.0568321	0.0568321	0.0568321	0.0568321	0.0568321	0.0568321	0.0568321	0.0568321	0.0568321	0.0568321	0.0568321	0.0568321	0.0568321	0.0568321	0.0568321	0.0568321	0.0568321	0.0568321	0.0568321	0.0568321	0.0568321	0.0568321	0.0568321	0.0568321	0.0568321	0.0568321
Neuron_119	0.0623661	0.0552018	0.0461248	0.0460249	0.0459108	0.0458935	0.0458995	0.0459015	0.0459021	0.0459019	0.0459019	0.0459019	0.0459019	0.0459019	0.0459019	0.0459019	0.0459019	0.0459019	0.0459019	0.0459019	0.0459019	0.0459019	0.0459019	0.0459019	0.0459019	0.0459019	0.0459019	0.0459019	0.0459019	0.0459019	0.0459019	0.0459019	0.0459019	0.0459019	0.0459019	0.0459019	0.0459019	0.0459019	0.0459019	0.0459019	0.0459019	0.0459019	0.0459019	0.0459019	0.0459019	0.0459019	0.0459019	0.0459019	0.0459019
Neuron_120	0.0430301	0.0389352	0.0375269	0.037105	0.0371508	0.037181	0.0371898	0.0371915	0.0371903	0.03719	0.03719	0.03719	0.03719	0.03719	0.03719	0.03719	0.03719	0.03719	0.03719	0.03719	0.03719	0.03719	0.03719	0.03719	0.03719	0.03719	0.03719	0.03719	0.03719	0.03719	0.03719	0.03719	0.03719	0.03719	0.03719	0.03719	0.03719	0.03719	0.03719	0.03719	0.03719	0.03719	0.03719	0.03719	0.03719	0.03719	0.03719	0.03719	0.03719
Neuron_121	0.0918297	0.0977957	0.0989167	0.0989828	0.0987075	0.098732	0.0987416	0.0987407	0.0987407	0.0987406	0.0987406	0.0987406	0.0987406	0.0987406	0.0987406	0.0987406	0.0987406	0.0987406	0.0987406	0.0987406	0.0987406	0.0987406	0.0987406	0.0987406	0.0987406	0.0987406	0.0987406	0.0987406	0.0987406	0.0987406	0.0987406	0.0987406	0.0987406	0.0987406	0.0987406	0.0987406	0.0987406	0.0987406	0.0987406	0.0987406	0.0987406	0.0987406	0.0987406	0.0987406	0.0987406	0.0987406	0.0987406	0.0987406	0.0987406
Neuron_122	0.00332174	0.00223812	0.00420528	0.00430702	0.00420017	0.00415701	0.00415972	0.00415996	0.00416108	0.00416107	0.00416106	0.00416107	0.00416107	0.00416107	0.00416107	0.00416107	0.00416107	0.00416107	0.00416107	0.00416107	0.00416107	0.00416107	0.00416107	0.00416107	0.00416107	0.00416107	0.00416107	0.00416107	0.00416107	0.00416107	0.00416107	0.00416107	0.00416107	0.00416107	0.00416107	0.00416107	0.00416107	0.00416107	0.00416107	0.00416107	0.00416107	0.00416107	0.00416107	0.00416107	0.00416107	0.00416107	0.00416107	0.00416107	0.00416107
Neuron_123	0.0649772	0.0610626	0.0587743	0.0578758	0.0578201	0.0578594	0.0578505	0.0578554	0.0578553	0.0578552	0.0578552	0.0578552	0.0578552	0.0578552	0.0578552	0.0578552	0.0578552	0.0578552	0.0578552	0.0578552	0.0578552	0.0578552	0.0578552	0.0578552	0.0578552	0.0578552	0.0578552	0.0578552	0.0578552	0.0578552	0.0578552	0.0578552	0.0578552	0.0578552	0.0578552	0.0578552	0.0578552	0.0578552	0.0578552	0.0578552	0.0578552	0.0578552	0.0578552	0.0578552	0.0578552	0.0578552	0.0578552	0.0578552	0.0578552
Neuron_124	0.0701461	0.0662529	0.0696007	0.0686357	0.0684845	0.0684962	0.0684884	0.0684913	0.0684912	0.068491	0.068491	0.068491	0.068491	0.068491	0.068491	0.068491	0.068491	0.068491	0.068491	0.068491	0.068491	0.068491	0.068491	0.068491	0.068491	0.068491	0.068491	0.068491	0.068491	0.068491	0.068491	0.068491	0.068491	0.068491	0.068491	0.068491	0.068491	0.068491	0.068491	0.068491	0.068491	0.068491	0.068491	0.068491	0.068491	0.068491	0.068491	0.068491	0.068491
Neuron_125	0.0783864	0.0762906	0.071584	0.072024	0.0726022	0.0726815	0.0726752	0.0726732	0.0726721	0.0726725	0.0726725	0.0726724	0.0726725	0.0726725	0.0726725	0.0726725	0.0726725	0.0726725	0.0726725	0.0726725	0.0726725	0.0726725	0.0726725	0.0726725	0.0726725	0.0726725	0.0726725	0.0726725	0.0726725	0.0726725	0.0726725	0.0726725	0.0726725	0.0726725	0.0726725	0.0726725	0.0726725	0.0726725	0.0726725	0.0726725	0.0726725	0.0726725	0.0726725	0.0726725	0.0726725	0.0726725	0.0726725	0.0726725	0.0726725
Neuron_126	0.00574078	0.0107323	0.0171126	0.0167318	0.0168346	0.0168809	0.0168732	0.0168722	0.0168722	0.0168724	0.0168724	0.0168724	0.0168724	0.0168724	0.0168724	0.0168724	0.0168724	0.0168724	0.0168724	0.0168724	0.0168724	0.0168724	0.0168724	0.0168724	0.0168724	0.0168724	0.0168724	0.0168724	0.0168724	0.0168724	0.0168724	0.0168724	0.0168724	0.0168724	0.0168724	0.0168724	0.0168724	0.0168724	0.0168724	0.0168724	0.0168724	0.0168724	0.0168724	0.0168724	0.0168724	0.0168724	0.0168724	0.0168724	0.0168724
Neuron_127	0.0910654	0.100265	0.096412	0.0959338	0.0963415	0.0962759	0.0962827	0.0962845	0.0962844	0.0962844	0.0962844	0.0962844	0.0962844	0.0962844	0.0962844	0.0962844	0.0962844	0.0962844	0.0962844	0.0962844	0.0962844	0.0962844	0.0962844	0.0962844	0.0962844	0.0962844	0.0962844	0.0962844	0.0962844	0.0962844	0.0962844	0.0962844	0.0962844	0.0962844	0.0962844	0.0962844	0.0962844	0.0962844	0.0962844	0.0962844	0.0962844	0.0962844	0.0962844	0.0962844	0.0962844	0.0962844	0.0962844	0.0962844	0.0962844
Neuron_128	0.0324993	0.0346344	0.0376722	0.0386345	0.0387081	0.0387141	0.0387067	0.038706	0.038706	0.038706	0.038706	0.0387059	0.0387059	0.0387059	0.0387059	0.0387059	0.0387059	0.0387059	0.0387059	0.0387059	0.0387059	0.0387059	0.0387059	0.0387059	0.0387059	0.0387059	0.0387059	0.0387059	0.0387059	0.0387059	0.0387059	0.0387059	0.0387059	0.0387059	0.0387059	0.0387059	0.0387059	0.0387059	0.0387059	0.0387059	0.0387059	0.0387059	0.0387059	0.0387059	0.0387059	0.0387059	0.0387059	0.0387059	0.0387059
Neuron_129	0.056246	0.0543433	0.0540212	0.0535049	0.0535073	0.0535614	0.0535738	0.0535741	0.0535728	0.0535727	0.0535727	0.0535727	0.0535727	0.0535727	0.0535727	0.0535727	0.0535727	0.0535727	0.0535727	0.0535727	0.0535727	0.0535727	0.0535727	0.0535727	0.0535727	0.0535727	0.0535727	0.0535727	0.0535727	0.0535727	0.0535727	0.0535727	0.0535727	0.0535727	0.0535727	0.0535727	0.0535727	0.0535727	0.0535727	0.0535727	0.0535727	0.0535727	0.0535727	0.0535727	0.0535727	0.0535727	0.0535727	0.0535727	0.0535727
Neuron_130	0.0671277	0.0734296	0.0662454	0.066032	0.0661224	0.0661374	0.0661408	0.0661391	0.066139	0.0661388	0.0661389	0.0661389	0.0661389	0.0661389	0.0661389	0.0661389	0.0661389	0.0661389	0.0661389	0.0661389	0.0661389	0.0661389	0.0661389	0.0661389	0.0661389	0.0661389	0.0661389	0.0661389	0.0661389	0.0661389	0.0661389	0.0661389	0.0661389	0.0661389	0.0661389	0.0661389	0.0661389	0.0661389	0.0661389	0.0661389	0.0661389	0.0661389	0.0661389	0.0661389	0.0661389	0.0661389	0.0661389	0.0661389	0.0661389
Neuron_131	0.0416641	0.0198241	0.0203537	0.0204118	0.0202622	0.020248	0.020257	0.0202592	0.0202583	0.0202582	0.0202583	0.0202583	0.0202583	0.0202583	0.0202583	0.0202583	0.0202583	0.0202583	0.0202583	0.0202583	0.0202583	0.0202583	0.0202583	0.0202583	0.0202583	0.0202583	0.0202583	0.0202583	0.0202583	0.0202583	0.0202583	0.0202583	0.0202583	0.0202583	0.0202583	0.0202583	0.0202583	0.0202583	0.0202583	0.0202583	0.0202583	0.0202583	0.0202583	0.0202583	0.0202583	0.0202583	0.0202583	0.0202583	0.0202583
Neuron_132	0.062952	0.067492	0.0685159	0.0677944	0.0676703	0.0676758	0.0676759	0.0676737	0.0676746	0.0676746	0.0676746	0.0676746	0.0676746	0.0676746	0.0676746	0.0676746	0.0676746	0.0676746	0.0676746	0.0676746	0.0676746	0.0676746	0.0676746	0.0676746	0.0676746	0.0676746	0.0676746	0.0676746	0.0676746	0.0676746	0.0676746	0.0676746	0.0676746	0.0676746	0.0676746	0.0676746	0.0676746	0.0676746	0.0676746	0.0676746	0.0676746	0.0676746	0.0676746	0.0676746	0.0676746	0.0676746	0.0676746	0.0676746	0.0676746
Neuron_133	0.0428756	0.0406125	0.047267	0.0463942	0.046419	0.0464898	0.0464959	0.046497	0.0464967	0.0464966	0.0464966	0.0464966	0.0464966	0.0464966	0.0464966	0.0464966	0.0464966	0.0464966	0.0464966	0.0464966	0.0464966	0.0464966	0.0464966	0.0464966	0.0464966	0.0464966	0.0464966	0.0464966	0.0464966	0.0464966	0.0464966	0.0464966	0.0464966	0.0464966	0.0464966	0.0464966	0.0464966	0.0464966	0.0464966	0.0464966	0.0464966	0.0464966	0.0464966	0.0464966	0.0464966	0.0464966	0.0464966	0.0464966	0.0464966
Neuron_134	0.0923992	0.0704335	0.0682233	0.0680515	0.0681688	0.0681913	0.0681831	0.0681869	0.0681873	0.0681872	0.0681873	0.0681873	0.0681873	0.0681873	0.0681873	0.0681873	0.0681873	0.0681873	0.0681873	0.0681873	0.0681873	0.0681873	0.0681873	0.0681873	0.0681873	0.0681873	0.0681873	0.0681873	0.0681873	0.0681873	0.0681873	0.0681873	0.0681873	0.0681873	0.0681873	0.0681873	0.0681873	0.0681873	0.0681873	0.0681873	0.0681873	0.0681873	0.0681873	0.0681873	0.0681873	0.0681873	0.0681873	0.0681873	0.0681873
Neuron_135	0.011437	0.00711775	0.01314	0.0118447	0.0118124	0.0118612	0.0118825	0.011882	0.0118811	0.011881	0.011881	0.0118811	0.0118811	0.0118811	0.0118811	0.0118811	0.0118811	0.0118811	0.0118811	0.0118811	0.0118811	0.0118811	0.0118811	0.0118811	0.0118811	0.0118811	0.0118811	0.0118811	0.0118811	0.0118811	0.0118811	0.0118811	0.0118811	0.0118811	0.0118811	0.0118811	0.0118811	0.0118811	0.0118811	0.0118811	0.0118811	0.0118811	0.0118811	0.0118811	0.0118811	0.0118811	0.0118811	0.0118811	0.0118811
Neuron_136	0.0166983	0.0200215	0.0172229	0.0196437	0.019639	0.0196869	0.0197008	0.0196957	0.0196953	0.0196955	0.0196955	0.0196955	0.0196955	0.0196955	0.0196955	0.0196955	0.0196955	0.0196955	0.0196955	0.0196955	0.0196955	0.0196955	0.0196955	0.0196955	0.0196955	0.0196955	0.0196955	0.0196955	0.0196955	0.0196955	0.0196955	0.0196955	0.0196955	0.0196955	0.0196955	0.0196955	0.0196955	0.0196955	0.0196955	0.0196955	0.0196955	0.0196955	0.0196955	0.0196955	0.0196955	0.0196955	0.0196955	0.0196955	0.0196955
Neuron_137	0.0889401	0.0560155	0.0543449	0.0532798	0.0535431	0.0535838	0.0535756	0.0535805	0.0535813	0.0535811	0.0535811	0.0535811	0.0535811	0.0535811	0.0535811	0.0535811	0.0535811	0.0535811	0.0535811	0.0535811	0.0535811	0.0535811	0.0535811	0.0535811	0.0535811	0.0535811	0.0535811	0.0535811	0.0535811	0.0535811	0.0535811	0.0535811	0.0535811	0.0535811	0.0535811	0.0535811	0.0535811	0.0535811	0.0535811	0.0535811	0.0535811	0.0535811	0.0535811	0.0535811	0.0535811	0.0535811	0.0535811	0.0535811	0.0535811
Neuron_138	0.0572808	0.0735126	0.0734285	0.0732523	0.0731986	0.0732258	0.0732414	0.0732384	0.073238	0.0732378	0.0732378	0.0732378	0.0732378	0.0732378	0.0732378	0.0732378	0.0732378	0.0732378	0.0732378	0.0732378	0.0732378	0.0732378	0.0732378	0.0732378	0.0732378	0.0732378	0.0732378	0.0732378	0.0732378	0.0732378	0.0732378	0.0732378	0.0732378	0.0732378	0.0732378	0.0732378	0.0732378	0.0732378	0.0732378	0.0732378	0.0732378	0.0732378	0.0732378	0.0732378	0.0732378	0.0732378	0.0732378	0.0732378	0.0732378
Neuron_139	0.0694907	0.0305122	0.0308209	0.0308206	0.0311752	0.0312044	0.0311877	0.0311861	0.0311862	0.0311863	0.0311863	0.0311863	0.0311863	0.0311863	0.0311863	0.0311863	0.0311863	0.0311863	0.0311863	0.0311863	0.0311863	0.0311863	0.0311863	0.0311863	0.0311863	0.0311863	0.0311863	0.0311863	0.0311863	0.0311863	0.0311863	0.0311863	0.0311863	0.0311863	0.0311863	0.0311863	0.0311863	0.0311863	0.0311863	0.0311863	0.0311863	0.0311863	0.0311863	0.0311863	0.0311863	0.0311863	0.0311863	0.0311863	0.0311863
Neuron_140	0.0499707	0.0441333	0.0473524	0.0476087	0.0476992	0.0477573	0.0477505	0.0477503	0.0477503	0.0477504	0.0477504	0.0477504	0.0477504	0.0477504	0.0477504	0.0477504	0.0477504	0.0477504	0.0477504	0.0477504	0.0477504	0.0477504	0.0477504	0.0477504	0.0477504	0.0477504	0.0477504	0.0477504	0.0477504	0.0477504	0.0477504	0.0477504	0.0477504	0.0477504	0.0477504	0.0477504	0.0477504	0.0477504	0.0477504	0.0477504	0.0477504	0.0477504	0.0477504	0.0477504	0.0477504	0.0477504	0.0477504	0.0477504	0.0477504
Neuron_141	0.0157071	0.0269987	0.0252	0.025848	0.0259294	0.0259724	0.0259697	0.0259657	0.0259662	0.025966	0.025966	0.025966	0.025966	0.025966	0.025966	0.025966	0.025966	0.025966	0.025966	0.025966	0.025966	0.025966	0.025966	0.025966	0.025966	0.025966	0.025966	0.025966	0.025966	0.025966	0.025966	0.025966	0.025966	0.025966	0.025966	0.025966	0.025966	0.025966	0.025966	0.025966	0.025966	0.025966	0.025966	0.025966	0.025966	0.025966	0.025966	0.025966	0.025966
Neuron_142	0.0404278	0.0439574	0.0450608	0.0452922	0.0452548	0.045259	0.0452705	0.0452716	0.0452706	0.0452706	0.0452706	0.0452706	0.0452706	0.0452706	0.0452706	0.0452706	0.0452706	0.0452706	0.0452706	0.0452706	0.0452706	0.0452706	0.0452706	0.0452706	0.0452706	0.0452706	0.0452706	0.0452706	0.0452706	0.0452706	0.0452706	0.0452706	0.0452706	0.0452706	0.0452706	0.0452706	0.0452706	0.0452706	0.0452706	0.0452706	0.0452706	0.0452706	0.0452706	0.0452706	0.0452706	0.0452706	0.0452706	0.0452706	0.0452706
Neuron_143	0.0198719	0.0217458	0.0197355	0.0206468	0.0207196	0.0207854	0.0207705	0.0207677	0.0207684	0.0207683	0.0207683	0.0207683	0.0207683	0.0207683	0.0207683	0.0207683	0.0207683	0.0207683	0.0207683	0.0207683	0.0207683	0.0207683	0.0207683	0.0207683	0.0207683	0.0207683	0.0207683	0.0207683	0.0207683	0.0207683	0.0207683	0.0207683	0.0207683	0.0207683	0.0207683	0.0207683	0.0207683	0.0207683	0.0207683	0.0207683	0.0207683	0.0207683	0.0207683	0.0207683	0.0207683	0.0207683	0.0207683	0.0207683	0.0207683
Neuron_144	0.0246369	0.0100432	0.0126718	0.0125083	0.0123113	0.012322	0.0123244	0.0123286	0.0123299	0.0123298	0.0123298	0.0123297	0.0123297	0.0123297	0.0123297	0.0123297	0.0123297	0.0123297	0.0123297	0.0123297	0.0123297	0.0123297	0.0123297	0.0123297	0.0123297	0.0123297	0.0123297	0.0123297	0.0123297	0.0123297	0.0123297	0.0123297	0.0123297	0.0123297	0.0123297	0.0123297	0.0123297	0.0123297	0.0123297	0.0123297	0.0123297	0.0123297	0.0123297	0.0123297	0.0123297	0.0123297	0.0123297	0.0123297	0.0123297
Neuron_145	0.00398522	0.00540172	0.0088967	0.00906705	0.00896355	0.00900129	0.00899461	0.00899352	0.00899337	0.00899332	0.00899337	0.00899336	0.00899336	0.00899336	0.00899336	0.00899336	0.00899336	0.00899336	0.00899336	0.00899336	0.00899336	0.00899336	0.00899336	0.00899336	0.00899336	0.00899336	0.00899336	0.00899336	0.00899336	0.00899336	0.00899336	0.00899336	0.00899336	0.00899336	0.00899336	0.00899336	0.00899336	0.00899336	0.00899336	0.00899336	0.00899336	0.00899336	0.00899336	0.00899336	0.00899336	0.00899336	0.00899336	0.00899336	0.00899336
Neuron_146	0.0184623	0.012262	0.0172436	0.0164726	0.0163174	0.016335	0.0163184	0.0163184	0.0163194	0.0163195	0.0163194	0.0163194	0.0163194	0.0163194	0.0163194	0.0163194	0.0163194	0.0163194	0.0163194	0.0163194	0.0163194	0.0163194	0.0163194	0.0163194	0.0163194	0.0163194	0.0163194	0.0163194	0.0163194	0.0163194	0.0163194	0.0163194	0.0163194	0.0163194	0.0163194	0.0163194	0.0163194	0.0163194	0.0163194	0.0163194	0.0163194	0.0163194	0.0163194	0.0163194	0.0163194	0.0163194	0.0163194	0.0163194	0.0163194
Neuron_147	0.0807059	0.0733792	0.0707575	0.0713386	0.0713577	0.0713373	0.0713309	0.0713359	0.0713351	0.071335	0.071335	0.071335	0.071335	0.071335	0.071335	0.071335	0.071335	0.071335	0.071335	0.071335	0.071335	0.071335	0.071335	0.071335	0.071335	0.071335	0.071335	0.071335	0.071335	0.071335	0.071335	0.071335	0.071335	0.071335	0.071335	0.071335	0.071335	0.071335	0.071335	0.071335	0.071335	0.071335	0.071335	0.071335	0.071335	0.071335	0.071335	0.071335	0.071335
Neuron_148	0.0670243	0.0633298	0.0609578	0.0612356	0.0613559	0.0613492	0.0613612	0.0613588	0.0613572	0.0613573	0.0613574	0.0613574	0.0613574	0.0613574	0.0613574	0.0613574	0.0613574	0.0613574	0.0613574	0.0613574	0.0613574	0.0613574	0.0613574	0.0613574	0.0613574	0.0613574	0.0613574	0.0613574	0.0613574	0.0613574	0.0613574	0.0613574	0.0613574	0.0613574	0.0613574	0.0613574	0.0613574	0.0613574	0.0613574	0.0613574	0.0613574	0.0613574	0.0613574	0.0613574	0.0613574	0.0613574	0.0613574	0.0613574	0.0613574
Neuron_149	0.0642997	0.0456652	0.0420363	0.04228	0.0424549	0.0424197	0.0424198	0.0424214	0.0424208	0.0424208	0.0424208	0.0424208	0.0424208	0.0424208	0.0424208	0.0424208	0.0424208	0.0424208	0.0424208	0.0424208	0.0424208	0.0424208	0.0424208	0.0424208	0.0424208	0.0424208	0.0424208	0.0424208	0.0424208	0.0424208	0.0424208	0.0424208	0.0424208	0.0424208	0.0424208	0.0424208	0.0424208	0.0424208	0.0424208	0.0424208	0.0424208	0.0424208	0.0424208	0.0424208	0.0424208	0.0424208	0.0424208	0.0424208	0.0424208
Neuron_150	0.0279418	0.0196904	0.0134788	0.0154016	0.0155803	0.0156332	0.0156183	0.0156181	0.0156174	0.0156174	0.0156174	0.0156174	0.0156174	0.0156174	0.0156174	0.0156174	0.0156174	0.0156174	0.0156174	0.0156174	0.0156174	0.0156174	0.0156174	0.0156174	0.0156174	0.0156174	0.0156174	0.0156174	0.0156174	0.0156174	0.0156174	0.0156174	0.0156174	0.0156174	0.0156174	0.0156174	0.0156174	0.0156174	0.0156174	0.0156174	0.0156174	0.0156174	0.0156174	0.0156174	0.0156174	0.0156174	0.0156174	0.0156174	0.0156174
Neuron_151	0.0394853	0.0218304	0.0198609	0.0197754	0.0201035	0.0201833	0.0201689	0.0201655	0.0201663	0.0201663	0.0201663	0.0201663	0.0201663	0.0201663	0.0201663	0.0201663	0.0201663	0.0201663	0.0201663	0.0201663	0.0201663	0.0201663	0.0201663	0.0201663	0.0201663	0.0201663	0.0201663	0.0201663	0.0201663	0.0201663	0.0201663	0.0201663	0.0201663	0.0201663	0.0201663	0.0201663	0.0201663	0.0201663	0.0201663	0.0201663	0.0201663	0.0201663	0.0201663	0.0201663	0.0201663	0.0201663	0.0201663	0.0201663	0.0201663
Neuron_152	0.00754474	0.0128647	0.0107832	0.009548	0.00976737	0.00972906	0.00973337	0.00973033	0.00973092	0.00973118	0.00973116	0.00973116	0.00973117	0.00973117	0.00973117	0.00973117	0.00973117	0.00973117	0.00973117	0.00973117	0.00973117	0.00973117	0.00973117	0.00973117	0.00973117	0.00973117	0.00973117	0.00973117	0.00973117	0.00973117	0.00973117	0.00973117	0.00973117	0.00973117	0.00973117	0.00973117	0.00973117	0.00973117	0.00973117	0.00973117	0.00973117	0.00973117	0.00973117	0.00973117	0.00973117	0.00973117	0.00973117	0.00973117	0.00973117
Neuron_153	0.0570882	0.052783	0.0537327	0.0531823	0.0529862	0.0528924	0.0528921	0.0528942	0.0528941	0.052894	0.052894	0.052894	0.052894	0.052894	0.052894	0.052894	0.052894	0.052894	0.052894	0.052894	0.052894	0.052894	0.052894	0.052894	0.052894	0.052894	0.052894	0.052894	0.052894	0.052894	0.052894	0.052894	0.052894	0.052894	0.052894	0.052894	0.052894	0.052894	0.052894	0.052894	0.052894	0.052894	0.052894	0.052894	0.052894	0.052894	0.052894	0.052894	0.052894
Neuron_154	0.09626	0.112015	0.113681	0.114129	0.113781	0.113787	0.113791	0.11379	0.113791	0.113791	0.113791	0.113791	0.113791	0.113791	0.113791	0.113791	0.113791	0.113791	0.113791	0.113791	0.113791	0.113791	0.113791	0.113791	0.113791	0.113791	0.113791	0.113791	0.113791	0.113791	0.113791	0.113791	0.113791	0.113791	0.113791	0.113791	0.113791	0.113791	0.113791	0.113791	0.113791	0.113791	0.113791	0.113791	0.113791	0.113791	0.113791	0.113791	0.113791
Neuron_155	0.0664015	0.051466	0.0532319	0.0537561	0.0539727	0.0539602	0.0539684	0.0539694	0.0539692	0.0539691	0.0539691	0.0539691	0.0539691	0.0539691	0.0539691	0.0539691	0.0539691	0.0539691	0.0539691	0.0539691	0.0539691	0.0539691	0.0539691	0.0539691	0.0539691	0.0539691	0.0539691	0.0539691	0.0539691	0.0539691	0.0539691	0.0539691	0.0539691	0.0539691	0.0539691	0.0539691	0.0539691	0.0539691	0.0539691	0.0539691	0.0539691	0.0539691	0.0539691	0.0539691	0.0539691	0.0539691	0.0539691	0.0539691	0.0539691
Neuron_156	0.0544409	0.0712462	0.0765943	0.0760406	0.0760473	0.0760589	0.076046	0.0760479	0.076048	0.0760479	0.0760479	0.0760479	0.0760479	0.0760479	0.0760479	0.0760479	0.0760479	0.0760479	0.0760479	0.0760479	0.0760479	0.0760479	0.0760479	0.0760479	0.0760479	0.0760479	0.0760479	0.0760479	0.0760479	0.0760479	0.0760479	0.0760479	0.0760479	0.0760479	0.0760479	0.0760479	0.0760479	0.0760479	0.0760479	0.0760479	0.0760479	0.0760479	0.0760479	0.0760479	0.0760479	0.0760479	0.0760479	0.0760479	0.0760479
Neuron_157	0.0784314	0.053171	0.0494572	0.050151	0.050326	0.0502947	0.050297	0.0502973	0.0502982	0.0502982	0.0502982	0.0502982	0.0502982	0.0502982	0.0502982	0.0502982	0.0502982	0.0502982	0.0502982	0.0502982	0.0502982	0.0502982	0.0502982	0.0502982	0.0502982	0.0502982	0.0502982	0.0502982	0.0502982	0.0502982	0.0502982	0.0502982	0.0502982	0.0502982	0.0502982	0.0502982	0.0502982	0.0502982	0.0502982	0.0502982	0.0502982	0.0502982	0.0502982	0.0502982	0.0502982	0.0502982	0.0502982	0.0502982	0.0502982
Neuron_158	0.0277617	0.0276428	0.0279987	0.0283025	0.0282079	0.0281073	0.0281124	0.0281152	0.0281158	0.0281155	0.0281155	0.0281155	0.0281155	0.0281155	0.0281155	0.0281155	0.0281155	0.0281155	0.0281155	0.0281155	0.0281155	0.0281155	0.0281155	0.0281155	0.0281155	0.0281155	0.0281155	0.0281155	0.0281155	0.0281155	0.0281155	0.0281155	0.0281155	0.0281155	0.0281155	0.0281155	0.0281155	0.0281155	0.0281155	0.0281155	0.0281155	0.0281155	0.0281155	0.0281155	0.0281155	0.0281155	0.0281155	0.0281155	0.0281155
Neuron_159	0.0510979	0.0372838	0.0411375	0.0412958	0.0414876	0.041464	0.0414549	0.0414543	0.0414538	0.0414539	0.0414539	0.0414539	0.0414539	0.0414539	0.0414539	0.0414539	0.0414539	0.0414539	0.0414539	0.0414539	0.0414539	0.0414539	0.0414539	0.0414539	0.0414539	0.0414539	0.0414539	0.0414539	0.0414539	0.0414539	0.0414539	0.0414539	0.0414539	0.0414539	0.0414539	0.0414539	0.0414539	0.0414539	0.0414539	0.0414539	0.0414539	0.0414539	0.0414539	0.0414539	0.0414539	0.0414539	0.0414539	0.0414539	0.0414539
Neuron_160	0.0416483	0.0599755	0.0579765	0.0575035	0.0572596	0.0572871	0.0572993	0.0572989	0.0572984	0.0572983	0.0572983	0.0572983	0.0572983	0.0572983	0.0572983	0.0572983	0.0572983	0.0572983	0.0572983	0.0572983	0.0572983	0.0572983	0.0572983	0.0572983	0.0572983	0.0572983	0.0572983	0.0572983	0.0572983	0.0572983	0.0572983	0.0572983	0.0572983	0.0572983	0.0572983	0.0572983	0.0572983	0.0572983	0.0572983	0.0572983	0.0572983	0.0572983	0.0572983	0.0572983	0.0572983	0.0572983	0.0572983	0.0572983	0.0572983
Neuron_161	0.044888	0.054079	0.0538544	0.0534402	0.053179	0.0531853	0.0531875	0.0531894	0.0531891	0.053189	0.053189	0.053189	0.053189	0.053189	0.053189	0.053189	0.053189	0.053189	0.053189	0.053189	0.053189	0.053189	0.053189	0.053189	0.053189	0.053189	0.053189	0.053189	0.053189	0.053189	0.053189	0.053189	0.053189	0.053189	0.053189	0.053189	0.053189	0.053189	0.053189	0.053189	0.053189	0.053189	0.053189	0.053189	0.053189	0.053189	0.053189	0.053189	0.053189
Neuron_162	0.0775641	0.090262	0.0873751	0.0855446	0.0856159	0.0857444	0.085752	0.0857535	0.0857532	0.0857529	0.0857529	0.0857529	0.0857529	0.0857529	0.0857529	0.0857529	0.0857529	0.0857529	0.0857529	0.0857529	0.0857529	0.0857529	0.0857529	0.0857529	0.0857529	0.0857529	0.0857529	0.0857529	0.0857529	0.0857529	0.0857529	0.0857529	0.0857529	0.0857529	0.0857529	0.0857529	0.0857529	0.0857529	0.0857529	0.0857529	0.0857529	0.0857529	0.0857529	0.0857529	0.0857529	0.0857529	0.0857529	0.0857529	0.0857529
Neuron_163	0.0388996	0.0257911	0.0252004	0.0245101	0.0246443	0.0246876	0.0246921	0.0246926	0.0246926	0.0246927	0.0246927	0.0246927	0.0246927	0.0246927	0.0246927	0.0246927	0.0246927	0.0246927	0.0246927	0.0246927	0.0246927	0.0246927	0.0246927	0.0246927	0.0246927	0.0246927	0.0246927	0.0246927	0.0246927	0.0246927	0.0246927	0.0246927	0.0246927	0.0246927	0.0246927	0.0246927	0.0246927	0.0246927	0.0246927	0.0246927	0.0246927	0.0246927	0.0246927	0.0246927	0.0246927	0.0246927	0.0246927	0.0246927	0.0246927
Neuron_164	0.0964858	0.0903756	0.0929792	0.091726	0.091859	0.0919264	0.0919035	0.0919031	0.0919033	0.0919032	0.0919032	0.0919032	0.0919032	0.0919032	0.0919032	0.0919032	0.0919032	0.0919032	0.0919032	0.0919032	0.0919032	0.0919032	0.0919032	0.0919032	0.0919032	0.0919032	0.0919032	0.0919032	0.0919032	0.0919032	0.0919032	0.0919032	0.0919032	0.0919032	0.0919032	0.0919032	0.0919032	0.0919032	0.0919032	0.0919032	0.0919032	0.0919032	0.0919032	0.0919032	0.0919032	0.0919032	0.0919032	0.0919032	0.0919032
Neuron_165	0.0835516	0.0962806	0.0971086	0.0971319	0.0973426	0.0973975	0.0974115	0.0974099	0.0974093	0.0974096	0.0974096	0.0974096	0.0974096	0.0974096	0.0974096	0.0974096	0.0974096	0.0974096	0.0974096	0.0974096	0.0974096	0.0974096	0.0974096	0.0974096	0.0974096	0.0974096	0.0974096	0.0974096	0.0974096	0.0974096	0.0974096	0.0974096	0.0974096	0.0974096	0.0974096	0.0974096	0.0974096	0.0974096	0.0974096	0.0974096	0.0974096	0.0974096	0.0974096	0.0974096	0.0974096	0.0974096	0.0974096	0.0974096	0.0974096
Neuron_166	0.0221408	0.0206785	0.0237523	0.0241513	0.0242433	0.024259	0.024263	0.0242611	0.0242608	0.0242612	0.0242612	0.0242612	0.0242612	0.0242612	0.0242612	0.0242612	0.0242612	0.0242612	0.0242612	0.0242612	0.0242612	0.0242612	0.0242612	0.0242612	0.0242612	0.0242612	0.0242612	0.0242612	0.0242612	0.0242612	0.0242612	0.0242612	0.0242612	0.0242612	0.0242612	0.0242612	0.0242612	0.0242612	0.0242612	0.0242612	0.0242612	0.0242612	0.0242612	0.0242612	0.0242612	0.0242612	0.0242612	0.0242612	0.0242612
Neuron_167	0.0229081	0.000598723	0.0106557	0.0102554	0.0104371	0.0103279	0.0103249	0.010324	0.0103242	0.0103245	0.0103244	0.0103244	0.0103244	0.0103244	0.0103244	0.0103244	0.0103244	0.0103244	0.0103244	0.0103244	0.0103244	0.0103244	0.0103244	0.0103244	0.0103244	0.0103244	0.0103244	0.0103244	0.0103244	0.0103244	0.0103244	0.0103244	0.0103244	0.0103244	0.0103244	0.0103244	0.0103244	0.0103244	0.0103244	0.0103244	0.0103244	0.0103244	0.0103244	0.0103244	0.0103244	0.0103244	0.0103244	0.0103244	0.0103244
Neuron_168	0.0990646	0.102153	0.104596	0.104474	0.104109	0.104072	0.104082	0.104081	0.104081	0.104081	0.104081	0.104081	0.104081	0.104081	0.104081	0.104081	0.104081	0.104081	0.104081	0.104081	0.104081	0.104081	0.104081	0.104081	0.104081	0.104081	0.104081	0.104081	0.104081	0.104081	0.104081	0.104081	0.104081	0.104081	0.104081	0.104081	0.104081	0.104081	0.104081	0.104081	0.104081	0.104081	0.104081	0.104081	0.104081	0.104081	0.104081	0.104081	0.104081
Neuron_169	0.0803661	0.077271	0.0768233	0.0774297	0.0776977	0.0777564	0.0777612	0.0777609	0.0777597	0.0777596	0.0777597	0.0777597	0.0777597	0.0777597	0.0777597	0.0777597	0.0777597	0.0777597	0.0777597	0.0777597	0.0777597	0.0777597	0.0777597	0.0777597	0.0777597	0.0777597	0.0777597	0.0777597	0.0777597	0.0777597	0.0777597	0.0777597	0.0777597	0.0777597	0.0777597	0.0777597	0.0777597	0.0777597	0.0777597	0.0777597	0.0777597	0.0777597	0.0777597	0.0777597	0.0777597	0.0777597	0.0777597	0.0777597	0.0777597
Neuron_170	0.0377795	0.029102	0.0252646	0.0249421	0.024906	0.0250057	0.0250138	0.0250127	0.0250121	0.0250121	0.0250121	0.0250121	0.0250121	0.0250121	0.0250121	0.0250121	0.0250121	0.0250121	0.0250121	0.0250121	0.0250121	0.0250121	0.0250121	0.0250121	0.0250121	0.0250121	0.0250121	0.0250121	0.0250121	0.0250121	0.0250121	0.0250121	0.0250121	0.0250121	0.0250121	0.0250121	0.0250121	0.0250121	0.0250121	0.0250121	0.0250121	0.0250121	0.0250121	0.0250121	0.0250121	0.0250121	0.0250121	0.0250121	0.0250121
Neuron_171	0.03654	0.0649795	0.0648285	0.0631113	0.0631415	0.0632508	0.0632544	0.0632537	0.063253	0.0632533	0.0632532	0.0632532	0.0632532	0.0632532	0.0632532	0.0632532	0.0632532	0.0632532	0.0632532	0.0632532	0.0632532	0.0632532	0.0632532	0.0632532	0.0632532	0.0632532	0.0632532	0.0632532	0.0632532	0.0632532	0.0632532	0.0632532	0.0632532	0.0632532	0.0632532	0.0632532	0.0632532	0.0632532	0.0632532	0.0632532	0.0632532	0.0632532	0.0632532	0.0632532	0.0632532	0.0632532	0.0632532	0.0632532	0.0632532
Neuron_172	0.0314697	0.0346244	0.0322902	0.0325978	0.0326599	0.0326349	0.032644	0.0326402	0.0326406	0.0326406	0.0326405	0.0326405	0.0326405	0.0326405	0.0326405	0.0326405	0.0326405	0.0326405	0.0326405	0.0326405	0.0326405	0.0326405	0.0326405	0.0326405	0.0326405	0.0326405	0.0326405	0.0326405	0.0326405	0.0326405	0.0326405	0.0326405	0.0326405	0.0326405	0.0326405	0.0326405	0.0326405	0.0326405	0.0326405	0.0326405	0.0326405	0.0326405	0.0326405	0.0326405	0.0326405	0.0326405	0.0326405	0.0326405	0.0326405
Neuron_173	0.0462027	0.031098	0.0360969	0.0365277	0.0367399	0.0366784	0.0366476	0.0366481	0.0366495	0.0366495	0.0366494	0.0366494	0.0366494	0.0366494	0.0366494	0.0366494	0.0366494	0.0366494	0.0366494	0.0366494	0.0366494	0.0366494	0.0366494	0.0366494	0.0366494	0.0366494	0.0366494	0.0366494	0.0366494	0.0366494	0.0366494	0.0366494	0.0366494	0.0366494	0.0366494	0.0366494	0.0366494	0.0366494	0.0366494	0.0366494	0.0366494	0.0366494	0.0366494	0.0366494	0.0366494	0.0366494	0.0366494	0.0366494	0.0366494
Neuron_174	0.0535723	0.0229618	0.0213537	0.0209469	0.0212058	0.0212696	0.021275	0.0212695	0.0212686	0.0212689	0.0212689	0.0212689	0.0212689	0.0212689	0.0212689	0.0212689	0.0212689	0.0212689	0.0212689	0.0212689	0.0212689	0.0212689	0.0212689	0.0212689	0.0212689	0.0212689	0.0212689	0.0212689	0.0212689	0.0212689	0.0212689	0.0212689	0.0212689	0.0212689	0.0212689	0.0212689	0.0212689	0.0212689	0.0212689	0.0212689	0.0212689	0.0212689	0.0212689	0.0212689	0.0212689	0.0212689	0.0212689	0.0212689	0.0212689
Neuron_175	0.0735051	0.0848904	0.0856326	0.0848782	0.0849023	0.0849126	0.0849089	0.0849089	0.0849082	0.0849082	0.0849083	0.0849083	0.0849083	0.0849083	0.0849083	0.0849083	0.0849083	0.0849083	0.0849083	0.0849083	0.0849083	0.0849083	0.0849083	0.0849083	0.0849083	0.0849083	0.0849083	0.0849083	0.0849083	0.0849083	0.0849083	0.0849083	0.0849083	0.0849083	0.0849083	0.0849083	0.0849083	0.0849083	0.0849083	0.0849083	0.0849083	0.0849083	0.0849083	0.0849083	0.0849083	0.0849083	0.0849083	0.0849083	0.0849083
Neuron_176	0.0152495	0.0182173	0.0206378	0.0195344	0.0191977	0.0192147	0.0192248	0.0192306	0.0192304	0.0192304	0.0192304	0.0192304	0.0192304	0.0192304	0.0192304	0.0192304	0.0192304	0.0192304	0.0192304	0.0192304	0.0192304	0.0192304	0.0192304	0.0192304	0.0192304	0.0192304	0.0192304	0.0192304	0.0192304	0.0192304	0.0192304	0.0192304	0.0192304	0.0192304	0.0192304	0.0192304	0.0192304	0.0192304	0.0192304	0.0192304	0.0192304	0.0192304	0.0192304	0.0192304	0.0192304	0.0192304	0.0192304	0.0192304	0.0192304
Neuron_177	0.0396775	0.0533045	0.054733	0.0547897	0.0545732	0.054527	0.0545163	0.0545197	0.05452	0.0545199	0.0545198	0.0545199	0.0545199	0.0545199	0.0545199	0.0545199	0.0545199	0.0545199	0.0545199	0.0545199	0.0545199	0.0545199	0.0545199	0.0545199	0.0545199	0.0545199	0.0545199	0.0545199	0.0545199	0.0545199	0.0545199	0.0545199	0.0545199	0.0545199	0.0545199	0.0545199	0.0545199	0.0545199	0.0545199	0.0545199	0.0545199	0.0545199	0.0545199	0.0545199	0.0545199	0.0545199	0.0545199	0.0545199	0.0545199
Neuron_178	0.0296242	0.0131089	0.015307	0.0151149	0.0150667	0.0150891	0.0150851	0.0150835	0.0150834	0.0150832	0.0150832	0.0150832	0.0150832	0.0150832	0.0150832	0.0150832	0.0150832	0.0150832	0.0150832	0.0150832	0.0150832	0.0150832	0.0150832	0.0150832	0.0150832	0.0150832	0.0150832	0.0150832	0.0150832	0.0150832	0.0150832	0.0150832	0.0150832	0.0150832	0.0150832	0.0150832	0.0150832	0.0150832	0.0150832	0.0150832	0.0150832	0.0150832	0.0150832	0.0150832	0.0150832	0.0150832	0.0150832	0.0150832	0.0150832
Neuron_179	0.0579296	0.0611846	0.0630742	0.0617346	0.0618838	0.0618501	0.0618453	0.0618479	0.0618481	0.061848	0.061848	0.061848	0.061848	0.061848	0.061848	0.061848	0.061848	0.061848	0.061848	0.061848	0.061848	0.061848	0.061848	0.061848	0.061848	0.061848	0.061848	0.061848	0.061848	0.061848	0.061848	0.061848	0.061848	0.061848	0.061848	0.061848	0.061848	0.061848	0.061848	0.061848	0.061848	0.061848	0.061848	0.061848	0.061848	0.061848	0.061848	0.061848	0.061848
Neuron_180	0.0977727	0.0890461	0.0867877	0.0862108	0.0859967	0.0860566	0.0860602	0.0860582	0.0860584	0.0860585	0.0860585	0.0860585	0.0860585	0.0860585	0.0860585	0.0860585	0.0860585	0.0860585	0.0860585	0.0860585	0.0860585	0.0860585	0.0860585	0.0860585	0.0860585	0.0860585	0.0860585	0.0860585	0.0860585	0.0860585	0.0860585	0.0860585	0.0860585	0.0860585	0.0860585	0.0860585	0.0860585	0.0860585	0.0860585	0.0860585	0.0860585	0.0860585	0.0860585	0.0860585	0.0860585	0.0860585	0.0860585	0.0860585	0.0860585
Neuron_181	0.0177037	0.0108428	0.0100996	0.0101304	0.00966151	0.00960468	0.00961861	0.0096226	0.00962314	0.00962282	0.00962276	0.00962276	0.00962276	0.00962276	0.00962276	0.00962276	0.00962276	0.00962276	0.00962276	0.00962276	0.00962276	0.00962276	0.00962276	0.00962276	0.00962276	0.00962276	0.00962276	0.00962276	0.00962276	0.00962276	0.00962276	0.00962276	0.00962276	0.00962276	0.00962276	0.00962276	0.00962276	0.00962276	0.00962276	0.00962276	0.00962276	0.00962276	0.00962276	0.00962276	0.00962276	0.00962276	0.00962276	0.00962276	0.00962276
Neuron_182	0.0721575	0.0733791	0.0713451	0.0701878	0.0702303	0.0702512	0.070243	0.070244	0.0702441	0.0702441	0.0702441	0.070244	0.070244	0.070244	0.070244	0.070244	0.070244	0.070244	0.070244	0.070244	0.070244	0.070244	0.070244	0.070244	0.070244	0.070244	0.070244	0.070244	0.070244	0.070244	0.070244	0.070244	0.070244	0.070244	0.070244	0.070244	0.070244	0.070244	0.070244	0.070244	0.070244	0.070244	0.070244	0.070244	0.070244	0.070244	0.070244	0.070244	0.070244
Neuron_183	0.0818124	0.0684253	0.0728232	0.0731509	0.0732146	0.0732682	0.073271	0.0732738	0.0732727	0.0732725	0.0732724	0.0732725	0.0732725	0.0732725	0.0732725	0.0732725	0.0732725	0.0732725	0.0732725	0.0732725	0.0732725	0.0732725	0.0732725	0.0732725	0.0732725	0.0732725	0.0732725	0.0732725	0.0732725	0.0732725	0.0732725	0.0732725	0.0732725	0.0732725	0.0732725	0.0732725	0.0732725	0.0732725	0.0732725	0.0732725	0.0732725	0.0732725	0.0732725	0.0732725	0.0732725	0.0732725	0.0732725	0.0732725	0.0732725
Neuron_184	0.0132948	0.0105905	0.0159388	0.0148763	0.0151273	0.0150633	0.0150508	0.0150561	0.0150558	0.015056	0.015056	0.015056	0.015056	0.015056	0.015056	0.015056	0.015056	0.015056	0.015056	0.015056	0.015056	0.015056	0.015056	0.015056	0.015056	0.015056	0.015056	0.015056	0.015056	0.015056	0.015056	0.015056	0.015056	0.015056	0.015056	0.015056	0.015056	0.015056	0.015056	0.015056	0.015056	0.015056	0.015056	0.015056	0.015056	0.015056	0.015056	0.015056	0.015056
Neuron_185	0.0898076	0.070008	0.070593	0.0713719	0.0711701	0.0711955	0.0711957	0.0711936	0.0711937	0.0711938	0.0711938	0.0711938	0.0711938	0.0711938	0.0711938	0.0711938	0.0711938	0.0711938	0.0711938	0.0711938	0.0711938	0.0711938	0.0711938	0.0711938	0.0711938	0.0711938	0.0711938	0.0711938	0.0711938	0.0711938	0.0711938	0.0711938	0.0711938	0.0711938	0.0711938	0.0711938	0.0711938	0.0711938	0.0711938	0.0711938	0.0711938	0.0711938	0.0711938	0.0711938	0.0711938	0.0711938	0.0711938	0.0711938	0.0711938
Neuron_186	0.0160476	0.0337678	0.0292717	0.0289134	0.0288146	0.0288756	0.0288745	0.0288685	0.0288691	0.0288689	0.0288689	0.0288689	0.0288689	0.0288689	0.0288689	0.0288689	0.0288689	0.0288689	0.0288689	0.0288689	0.0288689	0.0288689	0.0288689	0.0288689	0.0288689	0.0288689	0.0288689	0.0288689	0.0288689	0.0288689	0.0288689	0.0288689	0.0288689	0.0288689	0.0288689	0.0288689	0.0288689	0.0288689	0.0288689	0.0288689	0.0288689	0.0288689	0.0288689	0.0288689	0.0288689	0.0288689	0.0288689	0.0288689	0.0288689
Neuron_187	0.0163259	0.00986084	0.00722696	0.00680268	0.00667484	0.00663332	0.00663754	0.00663782	0.00663734	0.00663729	0.00663729	0.00663729	0.00663729	0.00663729	0.00663729	0.00663729	0.00663729	0.00663729	0.00663729	0.00663729	0.00663729	0.00663729	0.00663729	0.00663729	0.00663729	0.00663729	0.00663729	0.00663729	0.00663729	0.00663729	0.00663729	0.00663729	0.00663729	0.00663729	0.00663729	0.00663729	0.00663729	0.00663729	0.00663729	0.00663729	0.00663729	0.00663729	0.00663729	0.00663729	0.00663729	0.00663729	0.00663729	0.00663729	0.00663729
Neuron_188	0.0815626	0.094405	0.094995	0.09431	0.0941046	0.0941146	0.0941117	0.0941129	0.0941131	0.0941132	0.0941132	0.0941132	0.0941132	0.0941132	0.0941132	0.0941132	0.0941132	0.0941132	0.0941132	0.0941132	0.0941132	0.0941132	0.0941132	0.0941132	0.0941132	0.0941132	0.0941132	0.0941132	0.0941132	0.0941132	0.0941132	0.0941132	0.0941132	0.0941132	0.0941132	0.0941132	0.0941132	0.0941132	0.0941132	0.0941132	0.0941132	0.0941132	0.0941132	0.0941132	0.0941132	0.0941132	0.0941132	0.0941132	0.0941132
Neuron_189	0.0582888	0.0621267	0.0593114	0.0589609	0.0591429	0.0591388	0.0591516	0.059149	0.0591502	0.0591502	0.0591502	0.0591502	0.0591502	0.0591502	0.0591502	0.0591502	0.0591502	0.0591502	0.0591502	0.0591502	0.0591502	0.0591502	0.0591502	0.0591502	0.0591502	0.0591502	0.0591502	0.0591502	0.0591502	0.0591502	0.0591502	0.0591502	0.0591502	0.0591502	0.0591502	0.0591502	0.0591502	0.0591502	0.0591502	0.0591502	0.0591502	0.0591502	0.0591502	0.0591502	0.0591502	0.0591502	0.0591502	0.0591502	0.0591502
Neuron_190	0.0865041	0.0927937	0.0909799	0.0905363	0.0906195	0.0907005	0.0907	0.0906972	0.0906964	0.0906964	0.0906964	0.0906964	0.0906964	0.0906964	0.0906964	0.0906964	0.0906964	0.0906964	0.0906964	0.0906964	0.0906964	0.0906964	0.0906964	0.0906964	0.0906964	0.0906964	0.0906964	0.0906964	0.0906964	0.0906964	0.0906964	0.0906964	0.0906964	0.0906964	0.0906964	0.0906964	0.0906964	0.0906964	0.0906964	0.0906964	0.0906964	0.0906964	0.0906964	0.0906964	0.0906964	0.0906964	0.0906964	0.0906964	0.0906964
Neuron_191	0.0485516	0.0476549	0.0433721	0.0425558	0.0429286	0.0429438	0.0429492	0.0429455	0.0429454	0.0429452	0.0429452	0.0429452	0.0429452	0.0429452	0.0429452	0.0429452	0.0429452	0.0429452	0.0429452	0.0429452	0.0429452	0.0429452	0.0429452	0.0429452	0.0429452	0.0429452	0.0429452	0.0429452	0.0429452	0.0429452	0.0429452	0.0429452	0.0429452	0.0429452	0.0429452	0.0429452	0.0429452	0.0429452	0.0429452	0.0429452	0.0429452	0.0429452	0.0429452	0.0429452	0.0429452	0.0429452	0.0429452	0.0429452	0.0429452
Neuron_192	0.0163119	0.019266	0.0246875	0.0246439	0.0244937	0.0244407	0.0244523	0.0244528	0.024453	0.024453	0.024453	0.024453	0.024453	0.024453	0.024453	0.024453	0.024453	0.024453	0.024453	0.024453	0.024453	0.024453	0.024453	0.024453	0.024453	0.024453	0.024453	0.024453	0.024453	0.024453	0.024453	0.024453	0.024453	0.024453	0.024453	0.024453	0.024453	0.024453	0.024453	0.024453	0.024453	0.024453	0.024453	0.024453	0.024453	0.024453	0.024453	0.024453	0.024453
Neuron_193	0.0497896	0.0277411	0.0306952	0.0311546	0.0309921	0.0309805	0.0309576	0.0309595	0.0309593	0.0309593	0.0309594	0.0309593	0.0309593	0.0309593	0.0309593	0.0309593	0.0309593	0.0309593	0.0309593	0.0309593	0.0309593	0.0309593	0.0309593	0.0309593	0.0309593	0.0309593	0.0309593	0.0309593	0.0309593	0.0309593	0.0309593	0.0309593	0.0309593	0.0309593	0.0309593	0.0309593	0.0309593	0.0309593	0.0309593	0.0309593	0.0309593	0.0309593	0.0309593	0.0309593	0.0309593	0.0309593	0.0309593	0.0309593	0.0309593
Neuron_194	0.0539539	0.0449577	0.0449683	0.0444763	0.0444821	0.0445233	0.0445189	0.0445175	0.0445177	0.044518	0.044518	0.044518	0.044518	0.044518	0.044518	0.044518	0.044518	0.044518	0.044518	0.044518	0.044518	0.044518	0.044518	0.044518	0.044518	0.044518	0.044518	0.044518	0.044518	0.044518	0.044518	0.044518	0.044518	0.044518	0.044518	0.044518	0.044518	0.044518	0.044518	0.044518	0.044518	0.044518	0.044518	0.044518	0.044518	0.044518	0.044518	0.044518	0.044518
Neuron_195	0.0754122	0.0991127	0.0988435	0.0987928	0.098602	0.0986528	0.0986367	0.098634	0.0986348	0.098635	0.098635	0.098635	0.098635	0.098635	0.098635	0.098635	0.098635	0.098635	0.098635	0.098635	0.098635	0.098635	0.098635	0.098635	0.098635	0.098635	0.098635	0.098635	0.098635	0.098635	0.098635	0.098635	0.098635	0.098635	0.098635	0.098635	0.098635	0.098635	0.098635	0.098635	0.098635	0.098635	0.098635	0.098635	0.098635	0.098635	0.098635	0.098635	0.098635
Neuron_196	0.0700092	0.0775126	0.0833465	0.0817454	0.0818718	0.0819715	0.0819688	0.0819678	0.0819666	0.0819666	0.0819667	0.0819667	0.0819667	0.0819667	0.0819667	0.0819667	0.0819667	0.0819667	0.0819667	0.0819667	0.0819667	0.0819667	0.0819667	0.0819667	0.0819667	0.0819667	0.0819667	0.0819667	0.0819667	0.0819667	0.0819667	0.0819667	0.0819667	0.0819667	0.0819667	0.0819667	0.0819667	0.0819667	0.0819667	0.0819667	0.0819667	0.0819667	0.0819667	0.0819667	0.0819667	0.0819667	0.0819667	0.0819667	0.0819667
Neuron_197	0.0546614	0.0688364	0.0700942	0.0712221	0.0707366	0.070675	0.0706797	0.0706859	0.0706866	0.0706867	0.0706867	0.0706867	0.0706867	0.0706867	0.0706867	0.0706867	0.0706867	0.0706867	0.0706867	0.0706867	0.0706867	0.0706867	0.0706867	0.0706867	0.0706867	0.0706867	0.0706867	0.0706867	0.0706867	0.0706867	0.0706867	0.0706867	0.0706867	0.0706867	0.0706867	0.0706867	0.0706867	0.0706867	0.0706867	0.0706867	0.0706867	0.0706867	0.0706867	0.0706867	0.0706867	0.0706867	0.0706867	0.0706867	0.0706867
Neuron_198	0.0756467	0.066813	0.0660942	0.0652834	0.0653942	0.0654257	0.0654166	0.0654172	0.0654171	0.0654172	0.0654172	0.0654172	0.0654172	0.0654172	0.0654172	0.0654172	0.0654172	0.0654172	0.0654172	0.0654172	0.0654172	0.0654172	0.0654172	0.0654172	0.0654172	0.0654172	0.0654172	0.0654172	0.0654172	0.0654172	0.0654172	0.0654172	0.0654172	0.0654172	0.0654172	0.0654172	0.0654172	0.0654172	0.0654172	0.0654172	0.0654172	0.0654172	0.0654172	0.0654172	0.0654172	0.0654172	0.0654172	0.0654172	0.0654172
Neuron_199	0.0357351	0.035761	0.0359118	0.035193	0.0352728	0.0352794	0.0352884	0.0352912	0.0352912	0.0352912	0.0352913	0.0352913	0.0352913	0.0352913	0.0352913	0.0352913	0.0352913	0.0352913	0.0352913	0.0352913	0.0352913	0.0352913	0.0352913	0.0352913	0.0352913	0.0352913	0.0352913	0.0352913	0.0352913	0.0352913	0.0352913	0.0352913	0.0352913	0.0352913	0.0352913	0.0352913	0.0352913	0.0352913	0.0352913	0.0352913	0.0352913	0.0352913	0.0352913	0.0352913	0.0352913	0.0352913	0.0352913	0.0352913	0.0352913
Neuron_200	0.03184	0.0387406	0.0318908	0.0323733	0.0323181	0.0323449	0.0323542	0.0323535	0.032354	0.0323538	0.0323538	0.0323538	0.0323538	0.0323538	0.0323538	0.0323538	0.0323538	0.0323538	0.0323538	0.0323538	0.0323538	0.0323538	0.0323538	0.0323538	0.0323538	0.0323538	0.0323538	0.0323538	0.0323538	0.0323538	0.0323538	0.0323538	0.0323538	0.0323538	0.0323538	0.0323538	0.0323538	0.0323538	0.0323538	0.0323538	0.0323538	0.0323538	0.0323538	0.0323538	0.0323538	0.0323538	0.0323538	0.0323538	0.0323538
Neuron_201	0.0973849	0.0977313	0.101593	0.102062	0.101961	0.101993	0.101972	0.101972	0.101972	0.101972	0.101972	0.101972	0.101972	0.101972	0.101972	0.101972	0.101972	0.101972	0.101972	0.101972	0.101972	0.101972	0.101972	0.101972	0.101972	0.101972	0.101972	0.101972	0.101972	0.101972	0.101972	0.101972	0.101972	0.101972	0.101972	0.101972	0.101972	0.101972	0.101972	0.101972	0.101972	0.101972	0.101972	0.101972	0.101972	0.101972	0.101972	0.101972	0.101972
Neuron_202	0.0462943	0.0528188	0.0569463	0.0574531	0.0574499	0.0574264	0.0574254	0.0574272	0.0574274	0.0574273	0.0574273	0.0574273	0.0574273	0.0574273	0.0574273	0.0574273	0.0574273	0.0574273	0.0574273	0.0574273	0.0574273	0.0574273	0.0574273	0.0574273	0.0574273	0.0574273	0.0574273	0.0574273	0.0574273	0.0574273	0.0574273	0.0574273	0.0574273	0.0574273	0.0574273	0.0574273	0.0574273	0.0574273	0.0574273	0.0574273	0.0574273	0.0574273	0.0574273	0.0574273	0.0574273	0.0574273	0.0574273	0.0574273	0.0574273
Neuron_203	0.095529	0.109067	0.113121	0.112774	0.11242	0.11231	0.112316	0.112315	0.112315	0.112315	0.112315	0.112315	0.112315	0.112315	0.112315	0.112315	0.112315	0.112315	0.112315	0.112315	0.112315	0.112315	0.112315	0.112315	0.112315	0.112315	0.112315	0.112315	0.112315	0.112315	0.112315	0.112315	0.112315	0.112315	0.112315	0.112315	0.112315	0.112315	0.112315	0.112315	0.112315	0.112315	0.112315	0.112315	0.112315	0.112315	0.112315	0.112315	0.112315
Neuron_204	0.0535636	0.067751	0.0708878	0.0718741	0.0717082	0.0716606	0.0716601	0.0716594	0.071661	0.0716609	0.0716609	0.0716609	0.0716609	0.0716609	0.0716609	0.0716609	0.0716609	0.0716609	0.0716609	0.0716609	0.0716609	0.0716609	0.0716609	0.0716609	0.0716609	0.0716609	0.0716609	0.0716609	0.0716609	0.0716609	0.0716609	0.0716609	0.0716609	0.0716609	0.0716609	0.0716609	0.0716609	0.0716609	0.0716609	0.0716609	0.0716609	0.0716609	0.0716609	0.0716609	0.0716609	0.0716609	0.0716609	0.0716609	0.0716609
Neuron_205	0.0390184	0.0537137	0.0512111	0.0527928	0.0531413	0.0530964	0.053073	0.0530689	0.0530696	0.0530698	0.0530698	0.0530698	0.0530698	0.0530698	0.0530698	0.0530698	0.0530698	0.0530698	0.0530698	0.0530698	0.0530698	0.0530698	0.0530698	0.0530698	0.0530698	0.0530698	0.0530698	0.0530698	0.0530698	0.0530698	0.0530698	0.0530698	0.0530698	0.0530698	0.0530698	0.0530698	0.0530698	0.0530698	0.0530698	0.0530698	0.0530698	0.0530698	0.0530698	0.0530698	0.0530698	0.0530698	0.0530698	0.0530698	0.0530698
Neuron_206	0.0749939	0.0623106	0.0558935	0.0545054	0.0543102	0.0543927	0.0543907	0.0543882	0.0543894	0.0543893	0.0543893	0.0543893	0.0543893	0.0543893	0.0543893	0.0543893	0.0543893	0.0543893	0.0543893	0.0543893	0.0543893	0.0543893	0.0543893	0.0543893	0.0543893	0.0543893	0.0543893	0.0543893	0.0543893	0.0543893	0.0543893	0.0543893	0.0543893	0.0543893	0.0543893	0.0543893	0.0543893	0.0543893	0.0543893	0.0543893	0.0543893	0.0543893	0.0543893	0.0543893	0.0543893	0.0543893	0.0543893	0.0543893	0.0543893
Neuron_207	0.0863245	0.0830777	0.0862646	0.086853	0.0868839	0.0868574	0.0868482	0.0868484	0.0868483	0.0868482	0.0868482	0.0868482	0.0868482	0.0868482	0.0868482	0.0868482	0.0868482	0.0868482	0.0868482	0.0868482	0.0868482	0.0868482	0.0868482	0.0868482	0.0868482	0.0868482	0.0868482	0.0868482	0.0868482	0.0868482	0.0868482	0.0868482	0.0868482	0.0868482	0.0868482	0.0868482	0.0868482	0.0868482	0.0868482	0.0868482	0.0868482	0.0868482	0.0868482	0.0868482	0.0868482	0.0868482	0.0868482	0.0868482	0.0868482
Neuron_208	0.0284729	0.00599883	0.0071456	0.00753193	0.0075424	0.00756704	0.00755841	0.00756123	0.00756068	0.00756068	0.00756067	0.00756067	0.00756067	0.00756067	0.00756067	0.00756067	0.00756067	0.00756067	0.00756067	0.00756067	0.00756067	0.00756067	0.00756067	0.00756067	0.00756067	0.00756067	0.00756067	0.00756067	0.00756067	0.00756067	0.00756067	0.00756067	0.00756067	0.00756067	0.00756067	0.00756067	0.00756067	0.00756067	0.00756067	0.00756067	0.00756067	0.00756067	0.00756067	0.00756067	0.00756067	0.00756067	0.00756067	0.00756067	0.00756067
Neuron_209	0.0523803	0.0297295	0.0298653	0.0315383	0.031766	0.031764	0.0317616	0.0317571	0.0317575	0.0317577	0.0317577	0.0317577	0.0317577	0.0317577	0.0317577	0.0317577	0.0317577	0.0317577	0.0317577	0.0317577	0.0317577	0.0317577	0.0317577	0.0317577	0.0317577	0.0317577	0.0317577	0.0317577	0.0317577	0.0317577	0.0317577	0.0317577	0.0317577	0.0317577	0.0317577	0.0317577	0.0317577	0.0317577	0.0317577	0.0317577	0.0317577	0.0317577	0.0317577	0.0317577	0.0317577	0.0317577	0.0317577	0.0317577	0.0317577
Neuron_210	0.0731823	0.0597259	0.0592282	0.0587612	0.0587009	0.0587003	0.0586993	0.0586995	0.0587001	0.0587002	0.0587001	0.0587001	0.0587001	0.0587001	0.0587001	0.0587001	0.0587001	0.0587001	0.0587001	0.0587001	0.0587001	0.0587001	0.0587001	0.0587001	0.0587001	0.0587001	0.0587001	0.0587001	0.0587001	0.0587001	0.0587001	0.0587001	0.0587001	0.0587001	0.0587001	0.0587001	0.0587001	0.0587001	0.0587001	0.0587001	0.0587001	0.0587001	0.0587001	0.0587001	0.0587001	0.0587001	0.0587001	0.0587001	0.0587001
Neuron_211	0.0821546	0.108505	0.112542	0.112618	0.112516	0.112579	0.112578	0.11258	0.11258	0.11258	0.11258	0.11258	0.11258	0.11258	0.11258	0.11258	0.11258	0.11258	0.11258	0.11258	0.11258	0.11258	0.11258	0.11258	0.11258	0.11258	0.11258	0.11258	0.11258	0.11258	0.11258	0.11258	0.11258	0.11258	0.11258	0.11258	0.11258	0.11258	0.11258	0.11258	0.11258	0.11258	0.11258	0.11258	0.11258	0.11258	0.11258	0.11258	0.11258
Neuron_212	0.0986458	0.111348	0.111015	0.110926	0.110991	0.111027	0.111017	0.111013	0.111013	0.111013	0.111013	0.111013	0.111013	0.111013	0.111013	0.111013	0.111013	0.111013	0.111013	0.111013	0.111013	0.111013	0.111013	0.111013	0.111013	0.111013	0.111013	0.111013	0.111013	0.111013	0.111013	0.111013	0.111013	0.111013	0.111013	0.111013	0.111013	0.111013	0.111013	0.111013	0.111013	0.111013	0.111013	0.111013	0.111013	0.111013	0.111013	0.111013	0.111013
Neuron_213	0.0809336	0.0778164	0.0768296	0.0776046	0.077448	0.0774858	0.0774806	0.0774802	0.0774806	0.0774806	0.0774806	0.0774806	0.0774806	0.0774806	0.0774806	0.0774806	0.0774806	0.0774806	0.0774806	0.0774806	0.0774806	0.0774806	0.0774806	0.0774806	0.0774806	0.0774806	0.0774806	0.0774806	0.0774806	0.0774806	0.0774806	0.0774806	0.0774806	0.0774806	0.0774806	0.0774806	0.0774806	0.0774806	0.0774806	0.0774806	0.0774806	0.0774806	0.0774806	0.0774806	0.0774806	0.0774806	0.0774806	0.0774806	0.0774806
Neuron_214	0.00680941	0.011978	0.0138949	0.0146292	0.0146701	0.0146612	0.0146832	0.0146829	0.0146825	0.0146824	0.0146824	0.0146824	0.0146824	0.0146824	0.0146824	0.0146824	0.0146824	0.0146824	0.0146824	0.0146824	0.0146824	0.0146824	0.0146824	0.0146824	0.0146824	0.0146824	0.0146824	0.0146824	0.0146824	0.0146824	0.0146824	0.0146824	0.0146824	0.0146824	0.0146824	0.0146824	0.0146824	0.0146824	0.0146824	0.0146824	0.0146824	0.0146824	0.0146824	0.0146824	0.0146824	0.0146824	0.0146824	0.0146824	0.0146824
Neuron_215	0.0487694	0.055365	0.0566872	0.0563641	0.0562521	0.0562783	0.0562701	0.0562693	0.0562697	0.0562698	0.0562698	0.0562698	0.0562698	0.0562698	0.0562698	0.0562698	0.0562698	0.0562698	0.0562698	0.0562698	0.0562698	0.0562698	0.0562698	0.0562698	0.0562698	0.0562698	0.0562698	0.0562698	0.0562698	0.0562698	0.0562698	0.0562698	0.0562698	0.0562698	0.0562698	0.0562698	0.0562698	0.0562698	0.0562698	0.0562698	0.0562698	0.0562698	0.0562698	0.0562698	0.0562698	0.0562698	0.0562698	0.0562698	0.0562698
Neuron_216	0.0865757	0.0888683	0.0845052	0.0844133	0.0843837	0.0843477	0.0843344	0.0843375	0.0843385	0.0843386	0.0843386	0.0843386	0.0843386	0.0843386	0.0843386	0.0843386	0.0843386	0.0843386	0.0843386	0.0843386	0.0843386	0.0843386	0.0843386	0.0843386	0.0843386	0.0843386	0.0843386	0.0843386	0.0843386	0.0843386	0.0843386	0.0843386	0.0843386	0.0843386	0.0843386	0.0843386	0.0843386	0.0843386	0.0843386	0.0843386	0.0843386	0.0843386	0.0843386	0.0843386	0.0843386	0.0843386	0.0843386	0.0843386	0.0843386
Neuron_217	0.00244804	0.00541532	0.00920509	0.00926994	0.0093134	0.00934042	0.00935415	0.00935438	0.00935424	0.00935421	0.00935416	0.00935416	0.00935416	0.00935416	0.00935416	0.00935416	0.00935416	0.00935416	0.00935416	0.00935416	0.00935416	0.00935416	0.00935416	0.00935416	0.00935416	0.00935416	0.00935416	0.00935416	0.00935416	0.00935416	0.00935416	0.00935416	0.00935416	0.00935416	0.00935416	0.00935416	0.00935416	0.00935416	0.00935416	0.00935416	0.00935416	0.00935416	0.00935416	0.00935416	0.00935416	0.00935416	0.00935416	0.00935416	0.00935416
Neuron_218	0.022439	0.0309741	0.0294868	0.0295284	0.0292598	0.0292575	0.0292662	0.0292679	0.0292678	0.0292679	0.0292679	0.0292679	0.0292679	0.0292679	0.0292679	0.0292679	0.0292679	0.0292679	0.0292679	0.0292679	0.0292679	0.0292679	0.0292679	0.0292679	0.0292679	0.0292679	0.0292679	0.0292679	0.0292679	0.0292679	0.0292679	0.0292679	0.0292679	0.0292679	0.0292679	0.0292679	0.0292679	0.0292679	0.0292679	0.0292679	0.0292679	0.0292679	0.0292679	0.0292679	0.0292679	0.0292679	0.0292679	0.0292679	0.0292679
Neuron_219	0.0507093	0.0227378	0.0272273	0.0276385	0.0275955	0.0275703	0.0275557	0.0275592	0.0275597	0.0275596	0.0275597	0.0275597	0.0275597	0.0275597	0.0275597	0.0275597	0.0275597	0.0275597	0.0275597	0.0275597	0.0275597	0.0275597	0.0275597	0.0275597	0.0275597	0.0275597	0.0275597	0.0275597	0.0275597	0.0275597	0.0275597	0.0275597	0.0275597	0.0275597	0.0275597	0.0275597	0.0275597	0.0275597	0.0275597	0.0275597	0.0275597	0.0275597	0.0275597	0.0275597	0.0275597	0.0275597	0.0275597	0.0275597	0.0275597
Neuron_220	0.0843188	0.0778127	0.0778685	0.0769836	0.0772439	0.07718	0.0771755	0.0771746	0.0771754	0.0771756	0.0771755	0.0771755	0.0771755	0.0771755	0.0771755	0.0771755	0.0771755	0.0771755	0.0771755	0.0771755	0.0771755	0.0771755	0.0771755	0.0771755	0.0771755	0.0771755	0.0771755	0.0771755	0.0771755	0.0771755	0.0771755	0.0771755	0.0771755	0.0771755	0.0771755	0.0771755	0.0771755	0.0771755	0.0771755	0.0771755	0.0771755	0.0771755	0.0771755	0.0771755	0.0771755	0.0771755	0.0771755	0.0771755	0.0771755
Neuron_221	0.0483848	0.054142	0.0524608	0.0517316	0.0520197	0.0520555	0.0520472	0.052046	0.0520454	0.0520453	0.0520453	0.0520453	0.0520453	0.0520453	0.0520453	0.0520453	0.0520453	0.0520453	0.0520453	0.0520453	0.0520453	0.0520453	0.0520453	0.0520453	0.0520453	0.0520453	0.0520453	0.0520453	0.0520453	0.0520453	0.0520453	0.0520453	0.0520453	0.0520453	0.0520453	0.0520453	0.0520453	0.0520453	0.0520453	0.0520453	0.0520453	0.0520453	0.0520453	0.0520453	0.0520453	0.0520453	0.0520453	0.0520453	0.0520453
Neuron_222	0.0967531	0.0928878	0.092867	0.0937123	0.0937578	0.0937206	0.0937111	0.0937096	0.0937092	0.0937093	0.0937093	0.0937093	0.0937093	0.0937093	0.0937093	0.0937093	0.0937093	0.0937093	0.0937093	0.0937093	0.0937093	0.0937093	0.0937093	0.0937093	0.0937093	0.0937093	0.0937093	0.0937093	0.0937093	0.0937093	0.0937093	0.0937093	0.0937093	0.0937093	0.0937093	0.0937093	0.0937093	0.0937093	0.0937093	0.0937093	0.0937093	0.0937093	0.0937093	0.0937093	0.0937093	0.0937093	0.0937093	0.0937093	0.0937093
Neuron_223	0.00990007	0.0142915	0.0132927	0.0128277	0.0129319	0.0129462	0.0129278	0.0129293	0.0129296	0.0129295	0.0129295	0.0129295	0.0129295	0.0129295	0.0129295	0.0129295	0.0129295	0.0129295	0.0129295	0.0129295	0.0129295	0.0129295	0.0129295	0.0129295	0.0129295	0.0129295	0.0129295	0.0129295	0.0129295	0.0129295	0.0129295	0.0129295	0.0129295	0.0129295	0.0129295	0.0129295	0.0129295	0.0129295	0.0129295	0.0129295	0.0129295	0.0129295	0.0129295	0.0129295	0.0129295	0.0129295	0.0129295	0.0129295	0.0129295
Neuron_224	0.0813937	0.0780791	0.0824993	0.0818056	0.0818979	0.081859	0.081857	0.0818543	0.0818543	0.0818543	0.0818544	0.0818544	0.0818544	0.0818544	0.0818544	0.0818544	0.0818544	0.0818544	0.0818544	0.0818544	0.0818544	0.0818544	0.0818544	0.0818544	0.0818544	0.0818544	0.0818544	0.0818544	0.0818544	0.0818544	0.0818544	0.0818544	0.0818544	0.0818544	0.0818544	0.0818544	0.0818544	0.0818544	0.0818544	0.0818544	0.0818544	0.0818544	0.0818544	0.0818544	0.0818544	0.0818544	0.0818544	0.0818544	0.0818544
Neuron_225	0.0320237	0.027614	0.0254347	0.0252203	0.0255404	0.0255192	0.0255069	0.0255084	0.0255083	0.0255085	0.0255086	0.0255085	0.0255085	0.0255085	0.0255085	0.0255085	0.0255085	0.0255085	0.0255085	0.0255085	0.0255085	0.0255085	0.0255085	0.0255085	0.0255085	0.0255085	0.0255085	0.0255085	0.0255085	0.0255085	0.0255085	0.0255085	0.0255085	0.0255085	0.0255085	0.0255085	0.0255085	0.0255085	0.0255085	0.0255085	0.0255085	0.0255085	0.0255085	0.0255085	0.0255085	0.0255085	0.0255085	0.0255085	0.0255085
Neuron_226	0.00140972	0.0256539	0.0243006	0.0247761	0.0249761	0.0249516	0.0249418	0.0249396	0.0249401	0.0249401	0.0249401	0.0249401	0.0249401	0.0249401	0.0249401	0.0249401	0.0249401	0.0249401	0.0249401	0.0249401	0.0249401	0.0249401	0.0249401	0.0249401	0.0249401	0.0249401	0.0249401	0.0249401	0.0249401	0.0249401	0.0249401	0.0249401	0.0249401	0.0249401	0.0249401	0.0249401	0.0249401	0.0249401	0.0249401	0.0249401	0.0249401	0.0249401	0.0249401	0.0249401	0.0249401	0.0249401	0.0249401	0.0249401	0.0249401
Neuron_227	0.0050077	0.00466901	0.00755893	0.0082091	0.00847143	0.00842807	0.00840124	0.00840144	0.00840207	0.00840233	0.00840231	0.00840231	0.00840231	0.00840231	0.00840231	0.00840231	0.00840231	0.00840231	0.00840231	0.00840231	0.00840231	0.00840231	0.00840231	0.00840231	0.00840231	0.00840231	0.00840231	0.00840231	0.00840231	0.00840231	0.00840231	0.00840231	0.00840231	0.00840231	0.00840231	0.00840231	0.00840231	0.00840231	0.00840231	0.00840231	0.00840231	0.00840231	0.00840231	0.00840231	0.00840231	0.00840231	0.00840231	0.00840231	0.00840231
Neuron_228	0.00292717	0.0221653	0.0246852	0.0244832	0.0242229	0.024157	0.024168	0.0241711	0.0241706	0.0241706	0.0241706	0.0241706	0.0241706	0.0241706	0.0241706	0.0241706	0.0241706	0.0241706	0.0241706	0.0241706	0.0241706	0.0241706	0.0241706	0.0241706	0.0241706	0.0241706	0.0241706	0.0241706	0.0241706	0.0241706	0.0241706	0.0241706	0.0241706	0.0241706	0.0241706	0.0241706	0.0241706	0.0241706	0.0241706	0.0241706	0.0241706	0.0241706	0.0241706	0.0241706	0.0241706	0.0241706	0.0241706	0.0241706	0.0241706
Neuron_229	0.0450056	0.0473721	0.0467252	0.0461523	0.0462104	0.046292	0.0462907	0.0462882	0.0462884	0.0462884	0.0462884	0.0462884	0.0462884	0.0462884	0.0462884	0.0462884	0.0462884	0.0462884	0.0462884	0.0462884	0.0462884	0.0462884	0.0462884	0.0462884	0.0462884	0.0462884	0.0462884	0.0462884	0.0462884	0.0462884	0.0462884	0.0462884	0.0462884	0.0462884	0.0462884	0.0462884	0.0462884	0.0462884	0.0462884	0.0462884	0.0462884	0.0462884	0.0462884	0.0462884	0.0462884	0.0462884	0.0462884	0.0462884	0.0462884
Neuron_230	0.0162269	0.0420891	0.0434388	0.0437571	0.0436581	0.0436975	0.0436894	0.0436911	0.0436914	0.0436912	0.0436912	0.0436912	0.0436912	0.0436912	0.0436912	0.0436912	0.0436912	0.0436912	0.0436912	0.0436912	0.0436912	0.0436912	0.0436912	0.0436912	0.0436912	0.0436912	0.0436912	0.0436912	0.0436912	0.0436912	0.0436912	0.0436912	0.0436912	0.0436912	0.0436912	0.0436912	0.0436912	0.0436912	0.0436912	0.0436912	0.0436912	0.0436912	0.0436912	0.0436912	0.0436912	0.0436912	0.0436912	0.0436912	0.0436912
Neuron_231	0.0814082	0.0854727	0.0929363	0.0932872	0.0928327	0.0927655	0.0927791	0.0927811	0.0927806	0.0927806	0.0927807	0.0927807	0.0927807	0.0927807	0.0927807	0.0927807	0.0927807	0.0927807	0.0927807	0.0927807	0.0927807	0.0927807	0.0927807	0.0927807	0.0927807	0.0927807	0.0927807	0.0927807	0.0927807	0.0927807	0.0927807	0.0927807	0.0927807	0.0927807	0.0927807	0.0927807	0.0927807	0.0927807	0.0927807	0.0927807	0.0927807	0.0927807	0.0927807	0.0927807	0.0927807	0.0927807	0.0927807	0.0927807	0.0927807
Neuron_232	0.0855024	0.0713174	0.066003	0.0656748	0.0658662	0.0658728	0.0658599	0.0658592	0.06586	0.0658598	0.0658599	0.0658599	0.0658599	0.0658599	0.0658599	0.0658599	0.0658599	0.0658599	0.0658599	0.0658599	0.0658599	0.0658599	0.0658599	0.0658599	0.0658599	0.0658599	0.0658599	0.0658599	0.0658599	0.0658599	0.0658599	0.0658599	0.0658599	0.0658599	0.0658599	0.0658599	0.0658599	0.0658599	0.0658599	0.0658599	0.0658599	0.0658599	0.0658599	0.0658599	0.0658599	0.0658599	0.0658599	0.0658599	0.0658599
Neuron_233	0.0752831	0.10263	0.103685	0.102627	0.102844	0.102875	0.102871	0.10287	0.102869	0.102869	0.102869	0.102869	0.102869	0.102869	0.102869	0.102869	0.102869	0.102869	0.102869	0.102869	0.102869	0.102869	0.102869	0.102869	0.102869	0.102869	0.102869	0.102869	0.102869	0.102869	0.102869	0.102869	0.102869	0.102869	0.102869	0.102869	0.102869	0.102869	0.102869	0.102869	0.102869	0.102869	0.102869	0.102869	0.102869	0.102869	0.102869	0.102869	0.102869
Neuron_234	0.0338382	0.0272184	0.0287882	0.0288486	0.0287999	0.028768	0.0287833	0.0287835	0.0287833	0.0287834	0.0287833	0.0287833	0.0287833	0.0287833	0.0287833	0.0287833	0.0287833	0.0287833	0.0287833	0.0287833	0.0287833	0.0287833	0.0287833	0.0287833	0.0287833	0.0287833	0.0287833	0.0287833	0.0287833	0.0287833	0.0287833	0.0287833	0.0287833	0.0287833	0.0287833	0.0287833	0.0287833	0.0287833	0.0287833	0.0287833	0.0287833	0.0287833	0.0287833	0.0287833	0.0287833	0.0287833	0.0287833	0.0287833	0.0287833
Neuron_235	0.0219942	0.0113285	0.00932972	0.00967891	0.00997009	0.0100195	0.0100341	0.0100308	0.0100298	0.0100299	0.0100299	0.0100299	0.0100299	0.0100299	0.0100299	0.0100299	0.0100299	0.0100299	0.0100299	0.0100299	0.0100299	0.0100299	0.0100299	0.0100299	0.0100299	0.0100299	0.0100299	0.0100299	0.0100299	0.0100299	0.0100299	0.0100299	0.0100299	0.0100299	0.0100299	0.0100299	0.0100299	0.0100299	0.0100299	0.0100299	0.0100299	0.0100299	0.0100299	0.0100299	0.0100299	0.0100299	0.0100299	0.0100299	0.0100299
Neuron_236	0.0216139	0.0273873	0.0290162	0.0290297	0.029187	0.0291532	0.0291475	0.0291468	0.0291467	0.0291467	0.0291467	0.0291467	0.0291467	0.0291467	0.0291467	0.0291467	0.0291467	0.0291467	0.0291467	0.0291467	0.0291467	0.0291467	0.0291467	0.0291467	0.0291467	0.0291467	0.0291467	0.0291467	0.0291467	0.0291467	0.0291467	0.0291467	0.0291467	0.0291467	0.0291467	0.0291467	0.0291467	0.0291467	0.0291467	0.0291467	0.0291467	0.0291467	0.0291467	0.0291467	0.0291467	0.0291467	0.0291467	0.0291467	0.0291467
Neuron_237	0.0684412	0.0827212	0.0876001	0.0866916	0.0864565	0.0864085	0.0864065	0.0864088	0.0864089	0.0864087	0.0864087	0.0864087	0.0864087	0.0864087	0.0864087	0.0864087	0.0864087	0.0864087	0.0864087	0.0864087	0.0864087	0.0864087	0.0864087	0.0864087	0.0864087	0.0864087	0.0864087	0.0864087	0.0864087	0.0864087	0.0864087	0.0864087	0.0864087	0.0864087	0.0864087	0.0864087	0.0864087	0.0864087	0.0864087	0.0864087	0.0864087	0.0864087	0.0864087	0.0864087	0.0864087	0.0864087	0.0864087	0.0864087	0.0864087
Neuron_238	0.0271335	0.0204331	0.0239035	0.0225023	0.0224665	0.0224675	0.02248	0.0224798	0.022479	0.0224789	0.0224789	0.022479	0.022479	0.022479	0.022479	0.022479	0.022479	0.022479	0.022479	0.022479	0.022479	0.022479	0.022479	0.022479	0.022479	0.022479	0.022479	0.022479	0.022479	0.022479	0.022479	0.022479	0.022479	0.022479	0.022479	0.022479	0.022479	0.022479	0.022479	0.022479	0.022479	0.022479	0.022479	0.022479	0.022479	0.022479	0.022479	0.022479	0.022479
Neuron_239	0.00927654	0.0283303	0.029528	0.0301176	0.030058	0.0301565	0.0301488	0.0301458	0.0301459	0.0301461	0.0301461	0.0301461	0.0301461	0.0301461	0.0301461	0.0301461	0.0301461	0.0301461	0.0301461	0.0301461	0.0301461	0.0301461	0.0301461	0.0301461	0.0301461	0.0301461	0.0301461	0.0301461	0.0301461	0.0301461	0.0301461	0.0301461	0.0301461	0.0301461	0.0301461	0.0301461	0.0301461	0.0301461	0.0301461	0.0301461	0.0301461	0.0301461	0.0301461	0.0301461	0.0301461	0.0301461	0.0301461	0.0301461	0.0301461
Neuron_240	0.00170298	0.00738686	0.00565139	0.0054157	0.00508403	0.00508367	0.00509592	0.00509719	0.00509661	0.00509675	0.00509677	0.00509675	0.00509675	0.00509675	0.00509675	0.00509675	0.00509675	0.00509675	0.00509675	0.00509675	0.00509675	0.00509675	0.00509675	0.00509675	0.00509675	0.00509675	0.00509675	0.00509675	0.00509675	0.00509675	0.00509675	0.00509675	0.00509675	0.00509675	0.00509675	0.00509675	0.00509675	0.00509675	0.00509675	0.00509675	0.00509675	0.00509675	0.00509675	0.00509675	0.00509675	0.00509675	0.00509675	0.00509675	0.00509675
Neuron_241	0.00640379	0.0319399	0.0297522	0.029018	0.0290834	0.0291071	0.0291141	0.0291134	0.0291133	0.0291134	0.0291134	0.0291134	0.0291134	0.0291134	0.0291134	0.0291134	0.0291134	0.0291134	0.0291134	0.0291134	0.0291134	0.0291134	0.0291134	0.0291134	0.0291134	0.0291134	0.0291134	0.0291134	0.0291134	0.0291134	0.0291134	0.0291134	0.0291134	0.0291134	0.0291134	0.0291134	0.0291134	0.0291134	0.0291134	0.0291134	0.0291134	0.0291134	0.0291134	0.0291134	0.0291134	0.0291134	0.0291134	0.0291134	0.0291134
Neuron_242	0.029048	0.0147851	0.0240243	0.0239028	0.0240645	0.0240529	0.0240485	0.0240464	0.0240458	0.0240461	0.0240461	0.0240461	0.0240461	0.0240461	0.0240461	0.0240461	0.0240461	0.0240461	0.0240461	0.0240461	0.0240461	0.0240461	0.0240461	0.0240461	0.0240461	0.0240461	0.0240461	0.0240461	0.0240461	0.0240461	0.0240461	0.0240461	0.0240461	0.0240461	0.0240461	0.0240461	0.0240461	0.0240461	0.0240461	0.0240461	0.0240461	0.0240461	0.0240461	0.0240461	0.0240461	0.0240461	0.0240461	0.0240461	0.0240461
Neuron_243	0.0569408	0.0575427	0.0542913	0.0545703	0.0545281	0.0545277	0.0545324	0.0545282	0.054529	0.0545289	0.0545289	0.0545289	0.0545289	0.0545289	0.0545289	0.0545289	0.0545289	0.0545289	0.0545289	0.0545289	0.0545289	0.0545289	0.0545289	0.0545289	0.0545289	0.0545289	0.0545289	0.0545289	0.0545289	0.0545289	0.0545289	0.0545289	0.0545289	0.0545289	0.0545289	0.0545289	0.0545289	0.0545289	0.0545289	0.0545289	0.0545289	0.0545289	0.0545289	0.0545289	0.0545289	0.0545289	0.0545289	0.0545289	0.0545289
Neuron_244	0.0179269	0.0255201	0.0238411	0.0220626	0.0220835	0.0221101	0.0221237	0.0221255	0.0221249	0.0221248	0.0221247	0.0221248	0.0221248	0.0221248	0.0221248	0.0221248	0.0221248	0.0221248	0.0221248	0.0221248	0.0221248	0.0221248	0.0221248	0.0221248	0.0221248	0.0221248	0.0221248	0.0221248	0.0221248	0.0221248	0.0221248	0.0221248	0.0221248	0.0221248	0.0221248	0.0221248	0.0221248	0.0221248	0.0221248	0.0221248	0.0221248	0.0221248	0.0221248	0.0221248	0.0221248	0.0221248	0.0221248	0.0221248	0.0221248
Neuron_245	0.0283139	0.0386208	0.0430914	0.0420225	0.041705	0.0417325	0.0417228	0.0417266	0.0417258	0.0417259	0.0417259	0.0417259	0.0417259	0.0417259	0.0417259	0.0417259	0.0417259	0.0417259	0.0417259	0.0417259	0.0417259	0.0417259	0.0417259	0.0417259	0.0417259	0.0417259	0.0417259	0.0417259	0.0417259	0.0417259	0.0417259	0.0417259	0.0417259	0.0417259	0.0417259	0.0417259	0.0417259	0.0417259	0.0417259	0.0417259	0.0417259	0.0417259	0.0417259	0.0417259	0.0417259	0.0417259	0.0417259	0.0417259	0.0417259
Neuron_246	0.0355183	0.0311049	0.0279296	0.0280715	0.0283962	0.0283479	0.0283402	0.0283429	0.0283433	0.0283433	0.0283433	0.0283433	0.0283433	0.0283433	0.0283433	0.0283433	0.0283433	0.0283433	0.0283433	0.0283433	0.0283433	0.0283433	0.0283433	0.0283433	0.0283433	0.0283433	0.0283433	0.0283433	0.0283433	0.0283433	0.0283433	0.0283433	0.0283433	0.0283433	0.0283433	0.0283433	0.0283433	0.0283433	0.0283433	0.0283433	0.0283433	0.0283433	0.0283433	0.0283433	0.0283433	0.0283433	0.0283433	0.0283433	0.0283433
Neuron_247	0.0680631	0.0538215	0.0550591	0.0549972	0.0549202	0.0549395	0.0549376	0.054944	0.0549436	0.0549434	0.0549434	0.0549434	0.0549434	0.0549434	0.0549434	0.0549434	0.0549434	0.0549434	0.0549434	0.0549434	0.0549434	0.0549434	0.0549434	0.0549434	0.0549434	0.0549434	0.0549434	0.0549434	0.0549434	0.0549434	0.0549434	0.0549434	0.0549434	0.0549434	0.0549434	0.0549434	0.0549434	0.0549434	0.0549434	0.0549434	0.0549434	0.0549434	0.0549434	0.0549434	0.0549434	0.0549434	0.0549434	0.0549434	0.0549434
Neuron_248	0.0524142	0.0318869	0.0281844	0.0278524	0.0277641	0.0278183	0.0278176	0.0278205	0.0278197	0.0278194	0.0278194	0.0278194	0.0278194	0.0278194	0.0278194	0.0278194	0.0278194	0.0278194	0.0278194	0.0278194	0.0278194	0.0278194	0.0278194	0.0278194	0.0278194	0.0278194	0.0278194	0.0278194	0.0278194	0.0278194	0.0278194	0.0278194	0.0278194	0.0278194	0.0278194	0.0278194	0.0278194	0.0278194	0.0278194	0.0278194	0.0278194	0.0278194	0.0278194	0.0278194	0.0278194	0.0278194	0.0278194	0.0278194	0.0278194
Neuron_249	0.0786011	0.0738277	0.0739405	0.0736421	0.0735756	0.073555	0.0735597	0.0735574	0.0735581	0.0735579	0.0735579	0.0735579	0.0735579	0.0735579	0.0735579	0.0735579	0.0735579	0.0735579	0.0735579	0.0735579	0.0735579	0.0735579	0.0735579	0.0735579	0.0735579	0.0735579	0.0735579	0.0735579	0.0735579	0.0735579	0.0735579	0.0735579	0.0735579	0.0735579	0.0735579	0.0735579	0.0735579	0.0735579	0.0735579	0.0735579	0.0735579	0.0735579	0.0735579	0.0735579	0.0735579	0.0735579	0.0735579	0.0735579	0.0735579
Neuron_250	0.0992729	0.105537	0.103788	0.10321	0.103109	0.103134	0.103139	0.10314	0.103139	0.103139	0.103139	0.103139	0.103139	0.103139	0.103139	0.103139	0.103139	0.103139	0.103139	0.103139	0.103139	0.103139	0.103139	0.103139	0.103139	0.103139	0.103139	0.103139	0.103139	0.103139	0.103139	0.103139	0.103139	0.103139	0.103139	0.103139	0.103139	0.103139	0.103139	0.103139	0.103139	0.103139	0.103139	0.103139	0.103139	0.103139	0.103139	0.103139	0.103139
Neuron_251	0.0649001	0.0619679	0.0646261	0.0647051	0.0646776	0.0646862	0.0646894	0.0646935	0.0646932	0.064693	0.064693	0.064693	0.064693	0.064693	0.064693	0.064693	0.064693	0.064693	0.064693	0.064693	0.064693	0.064693	0.064693	0.064693	0.064693	0.064693	0.064693	0.064693	0.064693	0.064693	0.064693	0.064693	0.064693	0.064693	0.064693	0.064693	0.064693	0.064693	0.064693	0.064693	0.064693	0.064693	0.064693	0.064693	0.064693	0.064693	0.064693	0.064693	0.064693
Neuron_252	0.0881453	0.117104	0.119425	0.120249	0.119941	0.119883	0.119886	0.119887	0.119888	0.119888	0.119888	0.119888	0.119888	0.119888	0.119888	0.119888	0.119888	0.119888	0.119888	0.119888	0.119888	0.119888	0.119888	0.119888	0.119888	0.119888	0.119888	0.119888	0.119888	0.119888	0.119888	0.119888	0.119888	0.119888	0.119888	0.119888	0.119888	0.119888	0.119888	0.119888	0.119888	0.119888	0.119888	0.119888	0.119888	0.119888	0.119888	0.119888	0.119888
Neuron_253	0.097385	0.0949251	0.0951965	0.0948131	0.0948209	0.0948375	0.0948515	0.0948499	0.0948493	0.0948493	0.0948493	0.0948493	0.0948493	0.0948493	0.0948493	0.0948493	0.0948493	0.0948493	0.0948493	0.0948493	0.0948493	0.0948493	0.0948493	0.0948493	0.0948493	0.0948493	0.0948493	0.0948493	0.0948493	0.0948493	0.0948493	0.0948493	0.0948493	0.0948493	0.0948493	0.0948493	0.0948493	0.0948493	0.0948493	0.0948493	0.0948493	0.0948493	0.0948493	0.0948493	0.0948493	0.0948493	0.0948493	0.0948493	0.0948493
Neuron_254	0.0965973	0.0661712	0.0691251	0.0683121	0.068231	0.0682452	0.0682553	0.068257	0.0682566	0.0682566	0.0682567	0.0682566	0.0682566	0.0682566	0.0682566	0.0682566	0.0682566	0.0682566	0.0682566	0.0682566	0.0682566	0.0682566	0.0682566	0.0682566	0.0682566	0.0682566	0.0682566	0.0682566	0.0682566	0.0682566	0.0682566	0.0682566	0.0682566	0.0682566	0.0682566	0.0682566	0.0682566	0.0682566	0.0682566	0.0682566	0.0682566	0.0682566	0.0682566	0.0682566	0.0682566	0.0682566	0.0682566	0.0682566	0.0682566
Neuron_255	0.094218	0.0812278	0.0770644	0.0772914	0.0774238	0.077496	0.0774873	0.0774907	0.0774898	0.0774896	0.0774896	0.0774896	0.0774896	0.0774896	0.0774896	0.0774896	0.0774896	0.0774896	0.0774896	0.0774896	0.0774896	0.0774896	0.0774896	0.0774896	0.0774896	0.0774896	0.0774896	0.0774896	0.0774896	0.0774896	0.0774896	0.0774896	0.0774896	0.0774896	0.0774896	0.0774896	0.0774896	0.0774896	0.0774896	0.0774896	0.0774896	0.0774896	0.0774896	0.0774896	0.0774896	0.0774896	0.0774896	0.0774896	0.0774896
[truncated: 2 more columns]

## Sheet: u3
	Epoch_0	Epoch_1	Epoch_2	Epoch_3	Epoch_4	Epoch_5	Epoch_6	Epoch_7	Epoch_8	Epoch_9	Epoch_10	Epoch_11	Epoch_12	Epoch_13	Epoch_14	Epoch_15	Epoch_16	Epoch_17	Epoch_18	Epoch_19	Epoch_20	Epoch_21	Epoch_22	Epoch_23	Epoch_24	Epoch_25	Epoch_26	Epoch_27	Epoch_28	Epoch_29	Epoch_30	Epoch_31	Epoch_32	Epoch_33	Epoch_34	Epoch_35	Epoch_36	Epoch_37	Epoch_38	Epoch_39	Epoch_40	Epoch_41	Epoch_42	Epoch_43	Epoch_44	Epoch_45	Epoch_46	Epoch_47	Epoch_48
Neuron_0	0.0112272	0.0163705	0.0944567	0.111063	0.167138	0.0948799	0.184421	0.138602	0.132686	0.0642364	0.119595	0.138032	0.18141	0.157785	0.172035	0.175147	0.155706	0.167806	0.178901	0.206126	0.196986	0.203397	0.188679	0.187856	0.18448	0.197105	0.196484	0.210823	0.177799	0.181141	0.165557	0.183261	0.1646	0.168572	0.160479	0.162132	0.153402	0.145704	0.146956	0.149564	0.154263	0.150114	0.149491	0.150145	0.154587	0.154847	0.160013	0.15749	0.16585
Neuron_1	0.0175896	0.0672224	0.0183101	0.0755988	0.0812621	0.0590649	0.0869332	0.0482027	0.0143638	0.00710301	0.00671301	0.0413431	0.0308374	0.0554394	0.0466832	0.0302456	0.0285911	0.0374714	0.0577877	0.0522119	0.0638024	0.0780322	0.10043	0.110436	0.115706	0.126654	0.159074	0.166009	0.157178	0.132562	0.129033	0.116354	0.114433	0.0910141	0.085885	0.0722752	0.0656108	0.0485439	0.0418231	0.0462938	0.048706	0.0514088	0.0502264	0.0544391	0.0592531	0.0656346	0.0674444	0.0708644	0.0717886
Neuron_2	0.0827315	0.0284281	0.113232	0.05686	0.0405076	0.0361454	0.035297	0.0175752	0.0634863	0.0435747	0.121729	0.135428	0.14396	0.142434	0.128863	0.127683	0.117488	0.113018	0.120328	0.137694	0.138561	0.127243	0.133988	0.123468	0.133085	0.134203	0.153571	0.154962	0.156916	0.160375	0.154584	0.156751	0.148114	0.15048	0.150363	0.144565	0.140278	0.130952	0.132554	0.126768	0.124161	0.124512	0.122555	0.126634	0.122132	0.127815	0.12734	0.133394	0.133516
Neuron_3	0.0601555	0.00252813	0.0127533	0.00780409	0.10854	0.159439	0.111384	0.0628312	0.100044	0.154071	0.167093	0.199288	0.121295	0.0968664	0.127407	0.17141	0.178212	0.212828	0.234835	0.259505	0.242934	0.230776	0.216811	0.254516	0.280439	0.277428	0.268223	0.262111	0.248443	0.2353	0.21968	0.222743	0.226989	0.225782	0.210885	0.197147	0.200272	0.200834	0.203092	0.195377	0.199502	0.196307	0.201906	0.196157	0.201899	0.202266	0.208823	0.203973	0.203064
Neuron_4	0.00426798	0.0072076	0.00635841	0.0374146	0.0167494	0.0391723	0.0325736	0.016438	0.0603067	0.121029	0.175076	0.245903	0.244456	0.23521	0.232761	0.246247	0.291972	0.331192	0.367889	0.390632	0.401227	0.393133	0.40284	0.407607	0.434215	0.420058	0.41732	0.402806	0.400258	0.391303	0.374942	0.369631	0.352934	0.344754	0.328333	0.323036	0.322335	0.32661	0.322783	0.321594	0.315945	0.320979	0.319731	0.328686	0.328022	0.337228	0.335476	0.340529	0.337254
Neuron_5	0.0418603	0.0100286	0.0164395	0.0775631	0.173167	0.279832	0.3268	0.311725	0.314862	0.259423	0.291478	0.273357	0.300341	0.356371	0.364472	0.399105	0.36071	0.367147	0.350977	0.366128	0.352878	0.343171	0.337476	0.314084	0.309727	0.294578	0.293179	0.27456	0.250471	0.235776	0.215293	0.223999	0.220296	0.230169	0.2328	0.229356	0.234777	0.223902	0.239072	0.241794	0.258189	0.263409	0.265399	0.271146	0.269496	0.275642	0.274916	0.278791	0.281244
Neuron_6	0.0857244	0.0734871	0.0732156	0.0867384	0.0809302	0.0952526	0.168106	0.290312	0.360024	0.424954	0.402141	0.401365	0.403835	0.422335	0.463423	0.501477	0.529191	0.543623	0.542976	0.526478	0.518292	0.515783	0.505857	0.509591	0.480634	0.47325	0.434699	0.423378	0.386483	0.369238	0.359198	0.342987	0.33111	0.316161	0.3165	0.322645	0.326475	0.331275	0.334543	0.343603	0.351818	0.354554	0.366839	0.372177	0.387421	0.38462	0.392314	0.387722	0.396685
Neuron_7	0.03419	0.0420265	0.0551502	0.181777	0.215721	0.151314	0.0218742	0.010065	0.0512271	0.0976446	0.0786752	0.0314434	0.0269603	0.00555721	0.0101502	0.0270481	0.00717427	0.00349903	0.00902318	0.018704	0.0143004	0.0190865	0.0286015	0.0277814	0.0537166	0.0151469	0.012218	0.0189933	0.0118739	0.0216048	0.0115244	0.0106396	0.00994678	0.0251346	0.0385818	0.034721	0.0293754	0.0168388	0.0166495	0.0119148	0.0133106	0.00646562	0.0113921	0.00318988	0.00839343	0.00387144	0.0104424	0.00250457	0.014652
Neuron_8	0.00532744	0.0311746	0.0523567	0.100938	0.110312	0.252614	0.284963	0.253927	0.238176	0.174228	0.247355	0.256846	0.304204	0.320894	0.317256	0.315153	0.334277	0.328874	0.35434	0.332739	0.356978	0.328326	0.335137	0.300885	0.306187	0.302259	0.288582	0.271516	0.259415	0.260479	0.243689	0.240097	0.229648	0.238669	0.237283	0.239512	0.229868	0.238608	0.236295	0.250333	0.238215	0.257283	0.246956	0.265149	0.25416	0.266384	0.261611	0.269423	0.269453
Neuron_9	0.0799793	0.0423745	0.0904987	0.00709894	0.0539808	0.0130419	0.00439625	0.00769519	0.0389751	0.00267552	0.00719216	0.0597552	0.06039	0.0614245	0.0815403	0.0560718	0.0540652	0.038825	0.042492	0.0296825	0.0224022	0.0168446	0.0281067	0.0483421	0.0335701	0.0390823	0.033215	0.0380074	0.0371313	0.0454904	0.0369861	0.0407353	0.0219802	0.0179002	0.0124568	0.0148461	0.0199585	0.00820923	0.0133394	5.53688e-05	0.00571285	0.00540891	8.62039e-05	0.00272803	0.00216352	0.00494564	0.00340531	0.00848475	0.000987928
Neuron_10	0.0237218	0.0402056	0.0283957	0.104988	0.0672218	0.0853189	0.130405	0.111258	0.146316	0.119376	0.210381	0.248403	0.28839	0.292793	0.244658	0.217599	0.21084	0.260875	0.297135	0.341176	0.367452	0.372148	0.374841	0.366625	0.396727	0.385624	0.425174	0.412689	0.432919	0.414024	0.417269	0.408203	0.404958	0.399659	0.393296	0.38743	0.390332	0.384043	0.386099	0.38009	0.380221	0.377152	0.37164	0.375309	0.369699	0.381007	0.37293	0.381087	0.370063
Neuron_11	0.087669	0.140538	0.0686985	0.024514	0.06526	0.070621	0.0955907	0.134164	0.129318	0.0864757	0.0241109	0.00937026	0.00216094	0.00802957	0.02393	0.0337005	0.0388803	0.0168864	0.0131925	0.00136346	0.0129681	0.00734163	0.00332684	0.0215579	0.0129868	0.0280034	0.0106723	0.040109	0.0505485	0.0652438	0.0572268	0.0562379	0.0655692	0.0651804	0.0638126	0.0581347	0.058883	0.0690737	0.0656403	0.0679468	0.0624734	0.0695841	0.0713316	0.0680035	0.0697875	0.0641647	0.0730052	0.0672444	0.0692474
Neuron_12	0.0452326	0.0598413	0.074396	0.107444	0.117823	0.165388	0.114562	0.0899042	0.115757	0.052421	0.0547476	0.0796578	0.0724372	0.103907	0.0651654	0.0436051	0.0105011	0.0292095	0.00868758	0.0121508	0.0299682	0.0270632	0.0559164	0.0643665	0.0789828	0.0930781	0.0947132	0.104437	0.105339	0.105158	0.0925995	0.087341	0.0774037	0.0843405	0.0741231	0.0867316	0.0667188	0.0777989	0.0596009	0.0676416	0.0537534	0.0606096	0.0567741	0.0608836	0.0563372	0.055791	0.0533256	0.0548156	0.0542197
Neuron_13	0.0887631	0.0445711	0.0307892	0.0289273	0.0633424	0.0518933	0.0476908	0.0379255	0.012699	0.00532265	0.0771169	0.0562448	0.0671396	0.0267641	0.0402005	0.0264129	0.0687796	0.0723065	0.10145	0.0879732	0.116295	0.129374	0.114395	0.103109	0.114898	0.126715	0.133469	0.12003	0.127687	0.123817	0.12457	0.104962	0.0865238	0.100008	0.0898089	0.0961222	0.0742422	0.0836318	0.073769	0.0767876	0.0629349	0.0648651	0.0639695	0.0708432	0.0643456	0.068072	0.0653662	0.0742711	0.0699747
Neuron_14	0.0834825	0.0364645	0.00490269	0.00561642	0.0178506	0.0417836	0.0625839	0.0528455	0.00128732	0.0410242	0.0574089	0.0817491	0.0962957	0.14006	0.129954	0.164598	0.102492	0.124046	0.0967909	0.0979551	0.0547673	0.0562504	0.0432251	0.0477873	0.0549604	0.0554369	0.0548421	0.0572382	0.0658048	0.0716075	0.0796327	0.0908919	0.100334	0.0963431	0.10331	0.0883028	0.102524	0.0872543	0.106288	0.0867571	0.101413	0.0875215	0.0955661	0.0859122	0.0905081	0.0870012	0.0910418	0.088798	0.0920474
Neuron_15	0.0203706	0.0706671	0.0379172	0.00950204	0.064826	0.0976586	0.124954	0.111362	0.125011	0.0930168	0.0979914	0.0827462	0.127824	0.1326	0.118001	0.116918	0.117012	0.118431	0.152019	0.137202	0.135271	0.102489	0.111508	0.100664	0.0971563	0.0957159	0.0933459	0.108164	0.0987943	0.0880441	0.0729625	0.0804223	0.0872786	0.0924469	0.0946518	0.10458	0.10672	0.108161	0.0986341	0.107017	0.104749	0.115128	0.106231	0.112632	0.10807	0.112891	0.11013	0.1082	0.10893
Neuron_16	0.0216205	0.00159263	0.00715045	0.0441959	0.0861854	0.141706	0.167652	0.137552	0.105976	0.0716772	0.12273	0.131547	0.153551	0.10463	0.10059	0.0487391	0.0327818	0.016961	0.0155751	0.000750347	0.0060956	0.0142867	0.0140258	0.0397362	0.0244995	0.0272672	0.0203049	0.0251331	0.0203486	0.00417204	0.0126924	0.00225381	0.0146796	0.0100561	0.000414442	0.012991	0.00320254	0.0142507	0.00740502	0.0166258	0.00518915	0.0134219	0.00534468	0.0114774	0.00152263	0.00825017	0.003009	0.00911114	0.00396203
Neuron_17	0.00585199	0.0121407	0.0161773	0.0222134	0.0205542	0.0195682	0.0671241	0.0779626	0.0829358	0.132803	0.18292	0.185361	0.201898	0.23412	0.251475	0.246528	0.214616	0.198859	0.22341	0.203651	0.165412	0.124823	0.113915	0.0911525	0.0779134	0.054449	0.0525356	0.0456819	0.0371191	0.0172459	0.0177302	0.0297277	0.0459007	0.0492594	0.0553671	0.0570378	0.07263	0.0820035	0.0901785	0.0998004	0.105942	0.120463	0.117044	0.122055	0.117992	0.127034	0.126261	0.12545	0.119298
Neuron_18	0.00154413	0.0301141	0.0263438	0.0376894	0.102396	0.000428903	0.0867424	0.173981	0.169887	0.142436	0.1314	0.129313	0.163075	0.180034	0.194703	0.217293	0.212046	0.196332	0.166005	0.143688	0.13602	0.149565	0.145224	0.134561	0.120114	0.096252	0.0827642	0.0556906	0.0564991	0.0605632	0.0635434	0.0630858	0.0514509	0.0684081	0.0687685	0.0840989	0.0813745	0.0897653	0.098035	0.102485	0.106995	0.106954	0.114254	0.115915	0.115312	0.112998	0.10904	0.111779	0.110805
Neuron_19	0.0529509	0.0603823	0.018918	0.106521	0.107928	0.107556	0.0879105	0.0825222	0.0849574	0.0322567	0.0630758	0.0456709	0.0224368	0.0415104	0.0734316	0.106801	0.0979422	0.0883451	0.0703726	0.0801576	0.092046	0.0824918	0.0821502	0.0891968	0.0975428	0.0745117	0.0790679	0.0584393	0.0758621	0.0737023	0.0866554	0.0879597	0.0914196	0.101096	0.105063	0.11128	0.115956	0.114421	0.122697	0.120067	0.123356	0.119669	0.120516	0.121426	0.113807	0.113871	0.104796	0.108361	0.101866
Neuron_20	0.0328399	0.0532371	0.16779	0.178696	0.160658	0.206384	0.178733	0.157647	0.0856204	0.0316225	0.0727943	0.103918	0.163235	0.182449	0.171584	0.143893	0.0932502	0.0864222	0.088856	0.0777238	0.0771474	0.0421911	0.0207066	0.0199982	0.0301232	0.0673951	0.0763146	0.0767255	0.0710557	0.0711691	0.0881455	0.0968249	0.109778	0.109752	0.116362	0.11755	0.106415	0.0989916	0.0945099	0.0950934	0.0922004	0.0808313	0.0807768	0.068737	0.071664	0.0553483	0.0543209	0.0460217	0.0466073
Neuron_21	0.0525119	0.0230615	0.0988188	0.090275	0.00226671	0.00130234	0.0102642	0.0234115	0.00154422	0.0389994	0.0747755	0.0464029	0.00467418	0.0216513	0.0269138	0.103187	0.101046	0.0754366	0.0604847	0.0685806	0.0748123	0.0581877	0.0594732	0.0575107	0.0546692	0.0262716	0.00151801	0.0008387	0.0140342	0.0165227	0.0069636	0.00458261	0.000609992	0.0017998	0.0039066	0.0082585	0.00316365	0.00355612	0.00377851	0.00138757	0.00304802	0.00340797	0.00855048	0.0129905	0.0100525	0.0123423	0.013909	0.0191628	0.0186428
Neuron_22	0.0970417	0.0602692	0.131235	0.166488	0.121871	0.156933	0.200735	0.295594	0.394205	0.377343	0.402572	0.431602	0.476848	0.505244	0.483032	0.468972	0.464229	0.471006	0.466054	0.437168	0.432073	0.421303	0.415804	0.403149	0.380571	0.373596	0.3743	0.366772	0.363658	0.358744	0.370054	0.370245	0.373776	0.370969	0.376443	0.386526	0.395766	0.40062	0.405951	0.415878	0.420669	0.424592	0.42359	0.427243	0.430184	0.432745	0.43153	0.430114	0.429474
Neuron_23	0.0167269	0.104931	0.137861	0.0929721	0.11778	0.0716638	0.00196325	0.054758	0.0911274	0.08133	0.0808805	0.0687938	0.0897029	0.12988	0.178702	0.194743	0.195901	0.182286	0.189377	0.217241	0.208158	0.211093	0.184829	0.188586	0.17908	0.202672	0.187346	0.185938	0.167133	0.160397	0.138141	0.140062	0.133756	0.143266	0.137161	0.138744	0.129114	0.133189	0.136096	0.137114	0.145612	0.14715	0.155906	0.151714	0.159626	0.156924	0.165633	0.164357	0.16863
Neuron_24	0.0299895	0.00202866	0.043024	0.0787275	0.198134	0.241257	0.236587	0.151413	0.133839	0.0412513	0.0353884	0.0328409	0.00754091	0.0120284	0.0293371	0.0697744	0.101482	0.09153	0.0335397	0.0685987	0.0616303	0.110211	0.0810288	0.101031	0.0822822	0.0904107	0.0692312	0.0769111	0.0893582	0.107416	0.0967612	0.0798745	0.0596875	0.0567194	0.0546768	0.0524479	0.0520362	0.0511523	0.0558709	0.0417088	0.0495225	0.0393119	0.0612511	0.0530507	0.0663212	0.053419	0.0636605	0.0617334	0.0700098
Neuron_25	0.0112947	0.0423816	0.0848984	0.0832348	0.0294896	0.134691	0.159319	0.212285	0.217708	0.225506	0.172728	0.118852	0.118328	0.139376	0.145321	0.132453	0.129583	0.130261	0.141055	0.166647	0.182368	0.212164	0.212811	0.220256	0.207771	0.218831	0.219842	0.237246	0.230598	0.218804	0.210712	0.208249	0.218182	0.219225	0.225166	0.229205	0.231641	0.233326	0.230697	0.232058	0.238955	0.239487	0.240702	0.231327	0.232812	0.226652	0.227646	0.221641	0.221327
Neuron_26	0.0159834	0.05367	0.0322564	0.0489503	0.0146681	0.0114928	0.00326022	0.0110558	0.0394387	0.0418065	0.0236039	0.0170849	0.0153528	0.0223956	0.0275142	0.000872937	0.00331077	0.0160445	0.0326067	0.0347607	0.044187	0.0222364	0.0523952	0.0447328	0.0808974	0.0714897	0.0726648	0.0708508	0.0792174	0.0961139	0.0910803	0.0921908	0.0861	0.0815541	0.0821161	0.0717509	0.0784649	0.0768344	0.0773431	0.06838	0.0582489	0.061302	0.0552147	0.0654357	0.0570163	0.0644287	0.0587553	0.0624451	0.059972
Neuron_27	0.0488744	0.00259052	0.00788339	0.0570127	0.0119868	0.0492661	0.0484484	0.0271733	0.0701297	0.00230807	0.0880435	0.150497	0.170452	0.143813	0.121533	0.0971813	0.1011	0.0796753	0.0872079	0.0933798	0.0631773	0.06624	0.0442461	0.0552018	0.0492557	0.083132	0.0937233	0.107656	0.138977	0.153602	0.17746	0.179757	0.196783	0.20118	0.20636	0.208309	0.197529	0.202389	0.198801	0.193164	0.183732	0.173698	0.176216	0.164399	0.16887	0.159719	0.164703	0.163272	0.162853
Neuron_28	0.0812	0.0835491	0.088942	0.126122	0.159893	0.112206	0.0844265	0.148736	0.222578	0.216734	0.194788	0.193991	0.205485	0.190782	0.194148	0.180269	0.227276	0.211951	0.20136	0.162542	0.172471	0.200934	0.232706	0.232859	0.211982	0.18943	0.189926	0.177661	0.188431	0.191451	0.199802	0.203413	0.181128	0.174922	0.1624	0.183014	0.176566	0.183642	0.174591	0.182511	0.17733	0.182614	0.178895	0.187024	0.185763	0.188052	0.180549	0.184471	0.184758
Neuron_29	0.0893257	0.0834789	0.0586964	0.00508387	0.144002	0.259839	0.311323	0.282	0.272325	0.246096	0.20173	0.210415	0.213449	0.193533	0.188411	0.199149	0.218291	0.19148	0.166111	0.146692	0.175664	0.197259	0.211857	0.166633	0.165423	0.136489	0.131743	0.103262	0.112182	0.105943	0.113578	0.105709	0.109003	0.12021	0.129935	0.142995	0.138731	0.154814	0.153044	0.165782	0.162921	0.172457	0.167866	0.172729	0.162846	0.163881	0.153266	0.161552	0.154207
Neuron_30	0.0521162	0.135872	0.092753	0.151881	0.0692023	0.0908934	0.188201	0.198148	0.163813	0.172241	0.164032	0.223436	0.241752	0.287341	0.324096	0.375143	0.379312	0.351962	0.36398	0.384357	0.396372	0.419421	0.392112	0.403931	0.377481	0.381052	0.354667	0.35491	0.363142	0.347857	0.342791	0.320491	0.328794	0.327191	0.330763	0.323107	0.322683	0.324522	0.323886	0.319245	0.323533	0.322573	0.331999	0.322687	0.328473	0.32077	0.333935	0.330832	0.335478
Neuron_31	0.0239451	0.0220769	0.00729949	0.00706452	0.00668547	0.0772603	0.0937909	0.100179	0.0532046	0.0349698	0.0239604	0.0135124	0.0100626	0.000650427	0.0197045	0.0269911	0.0169061	0.0293603	0.0587652	0.0747004	0.108485	0.0993898	0.124971	0.0973892	0.117623	0.125006	0.140225	0.155222	0.151003	0.156798	0.14646	0.1442	0.138346	0.136971	0.143157	0.139753	0.135023	0.132382	0.127734	0.132648	0.125906	0.134481	0.126981	0.136686	0.127931	0.133617	0.129706	0.133863	0.132777
Neuron_32	0.0883675	0.110518	0.0759742	0.0124114	0.00223335	0.00801903	0.0283313	0.0100276	0.0502268	0.0421841	0.0110063	0.0135504	0.0437903	0.0231879	2.52073e-05	0.00845697	0.0209392	0.0614243	0.0818861	0.0977156	0.087145	0.101609	0.138544	0.158438	0.185311	0.1859	0.212254	0.20411	0.204238	0.192865	0.203727	0.215546	0.207816	0.188865	0.17732	0.177811	0.17766	0.166945	0.166063	0.163271	0.165523	0.157842	0.151855	0.154275	0.155664	0.161544	0.151618	0.153953	0.148196
Neuron_33	0.0548317	0.0375966	0.126617	0.148336	0.100655	0.0764005	0.106752	0.137088	0.0680639	0.0182757	0.0595867	0.0259761	0.0023954	0.0253646	0.0327501	0.0027992	0.0139415	0.0292329	0.0409672	0.0302591	0.0279036	0.0142221	0.0109298	0.0266047	0.0576925	0.0690995	0.0497001	0.0453675	0.0365663	0.044438	0.0458423	0.0553156	0.0534266	0.0462045	0.0337453	0.0272425	0.0241385	0.028426	0.0259139	0.0244792	0.0170412	0.0152441	0.0113579	0.0139084	0.0181078	0.0198882	0.0212184	0.0174199	0.0198215
Neuron_34	0.075888	0.019491	0.0511282	0.0926742	0.117935	0.177533	0.257494	0.25833	0.286976	0.347094	0.341415	0.290161	0.283038	0.293478	0.284323	0.297612	0.291035	0.293208	0.302595	0.332828	0.327922	0.34562	0.34905	0.353713	0.333312	0.344738	0.353381	0.374603	0.384541	0.381535	0.368933	0.35527	0.356314	0.349429	0.358213	0.352713	0.356423	0.344258	0.343343	0.328826	0.333158	0.329352	0.336459	0.329039	0.334421	0.329397	0.334848	0.333051	0.337917
Neuron_35	0.0371599	0.00502372	0.0434296	0.0127983	0.0862562	0.0534127	0.0013244	0.045139	0.0401567	0.0600241	0.0197759	0.0486304	0.0364665	0.0543991	0.0551288	0.0994034	0.123928	0.157429	0.130709	0.122935	0.107136	0.1056	0.0987866	0.0971254	0.0602129	0.0316567	0.00860589	0.0204185	0.0416906	0.0492251	0.0464096	0.0602631	0.0514322	0.074983	0.0575946	0.062139	0.040603	0.0457545	0.0365481	0.0373302	0.0295087	0.0310524	0.0235902	0.0249513	0.0146092	0.0195601	0.0130815	0.0187309	0.00975094
Neuron_36	0.0374479	0.0711755	0.0957317	0.136535	0.0758942	0.0484881	0.0533199	0.165683	0.253765	0.232615	0.16818	0.145176	0.142561	0.165708	0.208277	0.210237	0.208958	0.200215	0.181931	0.152633	0.152331	0.158833	0.144321	0.155068	0.137477	0.130061	0.118628	0.133028	0.131891	0.109072	0.102042	0.0972813	0.113122	0.118654	0.125055	0.13263	0.143305	0.148515	0.142802	0.147393	0.161087	0.169825	0.17491	0.17119	0.176202	0.172917	0.175566	0.170246	0.170903
Neuron_37	0.052217	0.00647305	0.0267068	0.110439	0.0972788	0.143161	0.183721	0.196258	0.169491	0.135868	0.18371	0.199623	0.154036	0.194299	0.210316	0.22315	0.208939	0.206542	0.170675	0.168406	0.176137	0.186874	0.192474	0.200756	0.186106	0.164364	0.158899	0.155874	0.155477	0.170238	0.17432	0.174686	0.173449	0.173788	0.18231	0.17885	0.185852	0.175728	0.181078	0.175336	0.174573	0.169601	0.17128	0.167481	0.165055	0.159849	0.159543	0.158308	0.162732
Neuron_38	0.035696	0.0859711	0.0950477	0.062804	0.0918781	0.124644	0.153139	0.151533	0.228791	0.205527	0.253609	0.19171	0.183992	0.199909	0.2563	0.245617	0.261818	0.234068	0.257193	0.221379	0.24517	0.232408	0.274811	0.272642	0.266069	0.232256	0.242243	0.241128	0.244819	0.231483	0.223171	0.229803	0.219654	0.227123	0.212851	0.23785	0.231313	0.24794	0.23245	0.252911	0.245839	0.266263	0.256782	0.271244	0.260881	0.270526	0.259497	0.264622	0.258407
Neuron_39	0.00997841	0.0907009	0.123112	0.173431	0.121089	0.0952036	0.0347076	0.101379	0.115471	0.114411	0.0649761	0.0675136	0.109483	0.137494	0.147403	0.131419	0.132354	0.0803796	0.0368999	0.042285	0.0468792	0.0697541	0.0367663	0.0387191	0.0112364	0.00399086	0.0272018	0.0128173	0.024	0.0176842	0.0327895	0.0438735	0.04026	0.0400736	0.034121	0.0293151	0.0265372	0.0249849	0.0207532	0.0183076	0.00301663	0.00369457	0.0109623	0.00050275	0.0151652	0.00466217	0.0182797	0.0103877	0.0225235
Neuron_40	0.0908189	0.0703153	0.121916	0.171702	0.224991	0.250678	0.260787	0.27566	0.211082	0.193202	0.173969	0.23956	0.266398	0.291073	0.274287	0.265993	0.274257	0.267865	0.274503	0.275422	0.278209	0.278831	0.258042	0.240843	0.204326	0.210512	0.197409	0.210089	0.214713	0.223495	0.247299	0.2435	0.260573	0.255333	0.274522	0.275022	0.278463	0.275119	0.273324	0.272789	0.269706	0.257636	0.255071	0.245862	0.250202	0.239586	0.243504	0.240193	0.246895
Neuron_41	0.0694717	0.183245	0.169446	0.200142	0.184034	0.20894	0.203927	0.261513	0.323319	0.223179	0.194919	0.204702	0.24572	0.262226	0.258952	0.245278	0.228463	0.182192	0.151029	0.110991	0.14525	0.11845	0.116585	0.0703024	0.0560029	0.0376643	0.0503709	0.0669819	0.0849778	0.10291	0.103713	0.113369	0.113473	0.130508	0.143951	0.164299	0.167682	0.166611	0.157321	0.16271	0.157942	0.170283	0.157021	0.164155	0.151365	0.156454	0.146986	0.151011	0.150585
Neuron_42	0.0725634	0.112716	0.101962	0.0387694	0.182345	0.234738	0.279772	0.254691	0.200652	0.156598	0.19312	0.246627	0.288363	0.305435	0.288116	0.260652	0.203266	0.203155	0.20236	0.240779	0.23008	0.212055	0.18918	0.186656	0.184727	0.172775	0.166815	0.169876	0.17188	0.180387	0.175148	0.194688	0.212099	0.229646	0.233802	0.238436	0.256063	0.264648	0.28196	0.282107	0.290094	0.286378	0.284641	0.276188	0.27405	0.273075	0.272641	0.265906	0.261948
Neuron_43	0.0616334	0.0366177	0.0451806	0.10267	0.00057224	0.00685705	0.00315272	0.0507737	0.0781087	0.0407331	0.0166593	0.138027	0.165819	0.143779	0.0692798	0.0071165	0.0329289	0.0309209	0.0651355	0.0500826	0.0700673	0.0709433	0.0640547	0.0441523	0.044732	0.0673995	0.0765227	0.0646079	0.0583222	0.0602488	0.0692891	0.0665295	0.0582783	0.0485082	0.0398529	0.0384093	0.0246739	0.0309875	0.0265816	0.0367037	0.0258839	0.0225202	0.015957	0.0199417	0.0262895	0.0293889	0.0319293	0.0336117	0.0338667
Neuron_44	0.00637677	0.0406092	0.0339155	0.0771429	0.0884735	0.0699119	0.0917017	0.024869	0.0360552	0.0661396	0.0706142	0.0827339	0.0011171	0.00998673	0.00914658	0.0220223	0.0189753	0.0247542	0.044615	0.0644154	0.0669472	0.0514078	0.0353447	0.052505	0.0528696	0.0528529	0.0435817	0.0464475	0.0447463	0.0358805	0.0330063	0.0118167	0.0232371	0.013516	0.025977	0.0106338	0.0231203	0.0193213	0.0248377	0.0198383	0.0190034	0.0188909	0.0254753	0.0233768	0.0259932	0.0210891	0.0285054	0.0253929	0.0259025
Neuron_45	0.0254056	0.00795794	0.00529286	0.0260629	0.144885	0.195304	0.107758	0.0746942	0.0526365	0.112074	0.163375	0.238783	0.255838	0.223984	0.2003	0.171161	0.132606	0.125154	0.137589	0.153809	0.157175	0.133247	0.139227	0.148939	0.144042	0.142116	0.117669	0.135817	0.105075	0.115101	0.100721	0.116743	0.108076	0.0981029	0.0802128	0.0815347	0.0872001	0.0991818	0.103842	0.116713	0.120712	0.122636	0.122578	0.128106	0.136691	0.139086	0.145496	0.139053	0.143545
Neuron_46	0.0305406	0.0970831	0.139991	0.186457	0.205006	0.262139	0.262801	0.224604	0.187092	0.197732	0.20748	0.222797	0.230496	0.203042	0.224136	0.21354	0.202947	0.222801	0.240491	0.261368	0.254012	0.304677	0.307692	0.355157	0.348481	0.367573	0.358884	0.366513	0.365578	0.378594	0.388722	0.391055	0.377859	0.374353	0.362748	0.362481	0.356159	0.355187	0.356311	0.346082	0.347677	0.332838	0.341344	0.330718	0.340803	0.331028	0.337068	0.330242	0.335114
Neuron_47	0.0323227	0.00888825	0.0914318	0.119139	0.0999386	0.00692072	0.0113307	0.0479717	0.0750072	0.100876	0.140349	0.137813	0.125436	0.122928	0.116574	0.124946	0.174645	0.226704	0.235721	0.23925	0.257753	0.267644	0.273993	0.273894	0.272161	0.281162	0.283148	0.278374	0.266197	0.272601	0.261991	0.245924	0.22576	0.219631	0.217047	0.218457	0.211699	0.20898	0.207744	0.208959	0.206824	0.209066	0.213826	0.221688	0.226288	0.228409	0.228969	0.230559	0.234771
Neuron_48	0.0910928	0.107168	0.118757	0.115452	0.0903702	0.176884	0.219447	0.210811	0.234125	0.192872	0.218507	0.171329	0.146962	0.1403	0.13048	0.0977779	0.101584	0.1008	0.102644	0.0995161	0.0938916	0.106842	0.0998363	0.11842	0.0974964	0.112578	0.122974	0.122671	0.129448	0.12868	0.135169	0.138521	0.135644	0.142725	0.138295	0.149861	0.143238	0.146757	0.146503	0.144793	0.142631	0.138592	0.139122	0.132582	0.133457	0.129981	0.129719	0.127711	0.126704
Neuron_49	0.0373686	0.0189973	0.012624	0.0439737	0.0247023	0.0418682	0.0711451	0.1072	0.0718259	0.0538947	0.112092	0.117456	0.154855	0.152262	0.139771	0.151579	0.145124	0.205827	0.16727	0.193378	0.148651	0.177387	0.148721	0.154484	0.15489	0.151842	0.17253	0.168403	0.164538	0.149785	0.147072	0.148972	0.146342	0.148359	0.151401	0.146115	0.15466	0.131608	0.142582	0.126895	0.148296	0.13294	0.144936	0.137447	0.14539	0.144268	0.145071	0.146542	0.148036
Neuron_50	0.0962878	0.0368565	0.0103644	0.0441121	0.0458554	0.0154762	0.0545075	0.038704	0.0969993	0.136343	0.16316	0.155552	0.161011	0.134068	0.154443	0.156923	0.203968	0.235641	0.229179	0.224638	0.207441	0.211551	0.215718	0.232896	0.237527	0.235533	0.229513	0.216704	0.198838	0.200068	0.183125	0.181957	0.164432	0.169016	0.152176	0.154451	0.148661	0.149724	0.148325	0.146515	0.15061	0.152091	0.160374	0.163035	0.167946	0.170673	0.172326	0.172247	0.17503
Neuron_51	0.0441065	0.153217	0.172672	0.207212	0.260126	0.262144	0.299744	0.29898	0.283558	0.230897	0.218389	0.163026	0.171962	0.200266	0.225096	0.257936	0.261737	0.2632	0.2515	0.231128	0.243506	0.223322	0.263729	0.248397	0.26657	0.252176	0.255897	0.271868	0.27223	0.296384	0.294206	0.318633	0.322313	0.334833	0.335793	0.338436	0.337742	0.337002	0.322728	0.323063	0.307211	0.315697	0.295897	0.303946	0.286698	0.292222	0.284216	0.286674	0.28743
Neuron_52	0.0772369	0.0291125	0.0105719	0.014335	0.00924842	0.000741796	0.0205927	0.016612	0.0418191	0.020252	0.0109186	0.0523984	0.028935	0.0151654	0.00858352	0.0313891	0.0459472	0.0441505	0.0036234	0.0117123	0.00717249	0.000702318	0.0162803	0.0109015	0.00173304	0.036887	0.0193314	0.0383978	0.0352287	0.0451384	0.056684	0.0510976	0.0587458	0.0492961	0.0540463	0.0468557	0.0360894	0.0383679	0.0298001	0.0287946	0.0137075	0.0065817	0.00571772	0.00165579	0.00553613	0.00717659	0.00316987	0.00569248	0.00186232
Neuron_53	0.0291913	0.149188	0.218337	0.0785119	0.00905216	0.0957	0.0455384	0.0107174	0.0989385	0.16574	0.119706	0.103018	0.110792	0.153587	0.141827	0.170126	0.173389	0.16997	0.140044	0.129021	0.126246	0.143177	0.13752	0.116325	0.104728	0.097336	0.0820849	0.082361	0.093284	0.105242	0.0968512	0.0754761	0.0728766	0.0647632	0.0837777	0.0745772	0.0897656	0.0833104	0.0891592	0.0798958	0.0840276	0.0884488	0.0967906	0.0984003	0.101039	0.0982387	0.102601	0.101768	0.106712
Neuron_54	0.0795452	0.0876859	0.0789706	0.137399	0.0915923	0.0813643	0.107179	0.0542049	0.0156305	0.0530194	0.0761503	0.0910004	0.00500399	0.00881394	0.0358916	0.0164751	0.00194371	0.0276714	0.00169037	0.0143949	0.026916	0.004248	0.021654	0.0261517	0.00806008	0.029611	7.56021e-05	0.00189998	0.0197643	0.0132658	0.0153755	0.02225	0.0188758	0.0290418	0.0170317	0.039235	0.0193177	0.0342162	0.00660089	0.0237755	0.00624155	0.0219849	0.00202708	0.0110003	0.00675941	0.00934885	0.00612349	0.00977261	1.89229e-05
Neuron_55	0.0145262	0.0749141	0.152163	0.128321	0.194818	0.146807	0.0338883	0.00560422	0.0312873	0.0578808	0.0274973	0.00750318	0.0167891	0.0233432	0.0115971	0.0275499	0.00453717	0.0228876	0.0117539	0.0111103	0.0101289	0.0199531	0.0031899	0.0247773	0.0162701	0.00301046	0.0255865	0.00824453	0.0272251	0.0426882	0.0431591	0.0378694	0.0312508	0.0314602	0.019822	0.0388875	0.0313555	0.0429268	0.021876	0.0161617	0.0123721	0.00642778	0.0143424	0.00340544	0.0149526	0.00112588	0.0107943	0.00285118	0.0115957
Neuron_56	0.0525553	0.0733177	0.0253326	0.104696	0.0647945	0.000869267	0.0434738	0.101845	0.0299708	0.0126599	0.0344926	0.0637827	0.165151	0.205777	0.177864	0.166919	0.139183	0.187127	0.198509	0.219031	0.221453	0.223953	0.234013	0.234068	0.247425	0.245099	0.244221	0.259868	0.253378	0.263994	0.253533	0.272054	0.267004	0.26864	0.258279	0.251619	0.260647	0.25725	0.259607	0.250871	0.255313	0.25053	0.242536	0.238609	0.236322	0.240593	0.239501	0.236039	0.23685
Neuron_57	0.0314986	0.0245214	0.00588233	0.0167093	0.0291245	0.0279697	0.036446	0.133296	0.147623	0.0963557	0.0620065	0.0673085	0.0723879	0.146009	0.173687	0.222339	0.20428	0.200711	0.152689	0.14658	0.144781	0.144085	0.152806	0.128814	0.110599	0.0757259	0.0733598	0.0533579	0.0526915	0.0321254	0.0428122	0.029047	0.0315284	0.0129608	0.0262826	0.0233894	0.0310261	0.0171517	0.024684	0.0262503	0.0349273	0.0356548	0.0382128	0.0436945	0.0450971	0.0494198	0.0462746	0.0535659	0.0562998
Neuron_58	0.0518083	0.0982679	0.0872454	0.0437614	0.0112618	0.108013	0.199013	0.211409	0.143816	0.154244	0.0817668	0.0890805	0.0659918	0.0680532	0.0786992	0.0874258	0.0823782	0.0639231	0.0610377	0.0909906	0.114918	0.12322	0.140136	0.160224	0.18249	0.20344	0.216917	0.227098	0.251133	0.255589	0.260502	0.247005	0.264934	0.266999	0.275136	0.266128	0.260654	0.255134	0.250473	0.242079	0.238802	0.235124	0.238057	0.230284	0.225839	0.218982	0.218735	0.219039	0.215701
Neuron_59	0.0547802	0.0818355	0.0566806	0.0153342	0.0183115	0.028188	0.0713678	0.0619647	0.0355787	0.0295034	0.0167674	0.0598439	0.109904	0.143418	0.165977	0.176327	0.184129	0.194113	0.224729	0.231811	0.242184	0.216916	0.204119	0.175186	0.146243	0.121095	0.093556	0.0962155	0.0714791	0.0662007	0.0402532	0.0413361	0.0412468	0.0434464	0.0472107	0.046608	0.0545769	0.0563146	0.0591343	0.0667087	0.0697903	0.0789707	0.0775734	0.0808325	0.0800399	0.082427	0.0879561	0.0863502	0.0925888
Neuron_60	0.0937593	0.135135	0.152116	0.138818	0.0975113	0.0600742	0.064608	0.0462402	0.0214526	0.0084107	0.0466772	0.00366979	0.0361709	0.054982	0.0231176	0.015853	0.0429591	0.0530741	0.0460192	0.0265191	0.00742891	0.0303674	0.014447	0.00485401	0.0113987	0.00218336	0.0019819	0.0345066	0.0262751	0.0441633	0.025505	0.0263218	0.0147771	0.0150291	0.0120187	0.00822221	0.0055812	0.00139194	0.00471118	0.000714927	0.00109685	0.00196562	0.00107173	0.00389581	0.00281714	0.0050706	0.00251922	0.00244271	0.00726934
Neuron_61	0.0628972	0.159942	0.106031	0.164923	0.146	0.104719	0.11392	0.229833	0.315843	0.356698	0.3881	0.393325	0.423469	0.439772	0.443545	0.45889	0.459718	0.442766	0.440574	0.429982	0.435601	0.424515	0.422394	0.382857	0.378601	0.352717	0.372339	0.353147	0.369186	0.354441	0.358682	0.350951	0.340778	0.339254	0.342629	0.349314	0.352708	0.350731	0.354547	0.356789	0.358762	0.364863	0.363272	0.376048	0.371623	0.383057	0.375624	0.387471	0.382099
Neuron_62	0.0791046	0.00962388	0.0385088	0.0879915	0.157998	0.172823	0.198628	0.256584	0.390605	0.439191	0.425753	0.395139	0.370806	0.372003	0.399677	0.43607	0.46303	0.450799	0.429572	0.375654	0.38628	0.380182	0.404637	0.392612	0.399671	0.38391	0.369703	0.36163	0.353816	0.357647	0.355087	0.349724	0.337179	0.325477	0.325471	0.327062	0.329433	0.330656	0.324146	0.331433	0.325249	0.338776	0.336277	0.354511	0.352507	0.36017	0.355146	0.35979	0.362518
Neuron_63	0.058585	0.0251586	0.0189848	0.0601136	0.125019	0.1568	0.129011	0.0958096	0.134266	0.121037	0.0932396	0.125136	0.11183	0.189318	0.184173	0.188055	0.189952	0.219999	0.224534	0.19283	0.193995	0.18674	0.192123	0.185654	0.179909	0.18639	0.171996	0.157535	0.131111	0.121283	0.131062	0.133291	0.151916	0.140774	0.1525	0.137285	0.148371	0.14403	0.157649	0.157972	0.167146	0.166047	0.165581	0.163191	0.166837	0.165197	0.167141	0.162108	0.163635
Neuron_64	0.0363028	0.0261575	0.110573	0.100093	0.0412398	0.0890046	0.0424197	0.0483362	0.0738166	0.0423776	0.0429445	0.0101671	0.0365225	0.0253908	0.0493491	0.0396293	0.0342555	0.0629998	0.0869565	0.0763939	0.0656992	0.0214816	0.024335	0.0116329	0.0306877	0.020597	0.0403689	0.0304346	0.0174413	0.00806712	0.010843	0.00966581	0.0259349	0.0473758	0.0410379	0.0595152	0.0596808	0.0687326	0.064182	0.0745438	0.0801017	0.0880643	0.078245	0.0788264	0.0688712	0.0786032	0.0674112	0.0674998	0.0554284
Neuron_65	0.038816	0.0484278	0.0448455	0.0865046	0.115143	0.145864	0.172723	0.244869	0.281946	0.236594	0.205057	0.183648	0.216243	0.211484	0.240388	0.212035	0.241743	0.231651	0.241325	0.23771	0.252756	0.289277	0.296045	0.324465	0.306736	0.321064	0.317689	0.331619	0.330187	0.335453	0.328743	0.335132	0.321068	0.325576	0.310736	0.325311	0.313132	0.316739	0.3023	0.302268	0.299183	0.296125	0.295071	0.288524	0.292444	0.287158	0.28812	0.282697	0.286442
Neuron_66	0.0340378	0.00871303	0.0711367	0.0472388	0.0625591	0.00759636	0.000532623	0.0703938	0.136132	0.100292	0.0747646	0.107465	0.177026	0.194782	0.188011	0.192576	0.158805	0.151007	0.13912	0.145199	0.159896	0.178293	0.156374	0.15062	0.144331	0.14597	0.13936	0.155719	0.160113	0.157989	0.164643	0.163865	0.165491	0.160105	0.159211	0.155773	0.160203	0.156094	0.156443	0.152053	0.160378	0.153419	0.153681	0.14875	0.154289	0.152652	0.156953	0.156238	0.160003
Neuron_67	0.0814311	0.0189515	0.0289249	0.19221	0.171507	0.110255	0.10763	0.0112904	0.0423729	0.0246449	0.00322104	0.0375648	0.0206195	0.00461413	0.0224935	0.032285	0.0450508	0.0323497	0.0430193	0.0207026	0.0008531	0.0247661	0.0116677	0.00596375	0.0147876	0.0370121	0.051434	0.0607127	0.0775962	0.0669416	0.0681824	0.0418501	0.0502565	0.044209	0.052364	0.0416437	0.0408024	0.0373222	0.0389735	0.0321261	0.0381588	0.031557	0.038131	0.0287703	0.0335923	0.0288051	0.0330073	0.0321208	0.0304888
Neuron_68	0.013816	0.0531257	0.0196132	0.0210963	0.0195343	0.0465112	0.0416137	0.0324698	0.00403906	0.0675146	0.109012	0.123282	0.0897483	0.115331	0.10442	0.150677	0.17236	0.197932	0.210078	0.229631	0.23033	0.212284	0.20783	0.187559	0.186008	0.1854	0.176729	0.163051	0.149481	0.139881	0.123665	0.109137	0.106082	0.097526	0.107493	0.0979354	0.100084	0.093858	0.101833	0.0965858	0.0984227	0.0999623	0.104489	0.106682	0.109225	0.110721	0.113499	0.116132	0.119069
Neuron_69	0.0363772	0.0614936	0.142577	0.100772	0.121483	0.14967	0.195873	0.183858	0.159709	0.084676	0.0852868	0.114321	0.164497	0.186698	0.193633	0.18923	0.187733	0.199764	0.269111	0.290927	0.310026	0.31859	0.320337	0.310244	0.286174	0.30474	0.307945	0.332184	0.315825	0.296201	0.279976	0.278125	0.278353	0.279329	0.286064	0.28553	0.278427	0.272902	0.268168	0.272242	0.277662	0.280586	0.276079	0.270889	0.272031	0.268745	0.275021	0.271576	0.275906
Neuron_70	0.0425072	0.0922886	0.0735541	0.0765525	0.0939026	0.0847762	0.0491093	0.00105074	0.0212168	0.00745312	0.0150095	0.00779247	0.0562022	0.0631906	0.0918913	0.0978748	0.116231	0.134966	0.121514	0.132645	0.113614	0.118447	0.140684	0.131382	0.126891	0.106184	0.0985832	0.0685519	0.0545778	0.054476	0.0450136	0.0565476	0.0439107	0.0480488	0.0395896	0.0542125	0.0495748	0.0559629	0.0597794	0.065761	0.0686537	0.0718505	0.0705388	0.0743923	0.071218	0.074996	0.0672616	0.0722065	0.0711704
Neuron_71	0.00185309	0.0571954	0.0577993	0.156753	0.205734	0.197261	0.146367	0.141757	0.111198	0.107997	0.105576	0.167944	0.186823	0.177171	0.189933	0.190082	0.21355	0.220346	0.217643	0.232328	0.225321	0.232979	0.212431	0.238146	0.223433	0.215097	0.189025	0.202439	0.191821	0.198559	0.195623	0.197099	0.206828	0.203828	0.204954	0.19856	0.207179	0.205174	0.207724	0.204791	0.208708	0.201326	0.207914	0.198073	0.205246	0.197212	0.206142	0.198802	0.204117
Neuron_72	0.084858	0.0800687	0.116551	0.102211	0.0536051	0.0931212	0.110815	0.0693309	0.00798169	0.0126571	0.0250306	0.0431607	0.0679734	0.0674055	0.10315	0.124662	0.130127	0.131457	0.116142	0.15043	0.173796	0.180504	0.167895	0.168636	0.175726	0.163266	0.178678	0.17026	0.185035	0.173525	0.164047	0.159857	0.16084	0.174171	0.164384	0.161937	0.152754	0.143982	0.144438	0.136364	0.141659	0.137009	0.139643	0.133637	0.129289	0.132316	0.131076	0.138746	0.136646
Neuron_73	0.0492075	0.0278817	0.0199266	0.00908571	0.0248091	0.0230657	0.0337904	0.0131844	0.0623574	0.0949445	0.0641197	0.0315821	0.0305726	0.0081625	0.000229845	0.0180747	0.0338311	0.0600017	0.0142496	0.00514932	0.0304579	0.0342314	0.049028	0.0517334	0.0444019	0.0532016	0.0485192	0.0583858	0.0442977	0.0425862	0.0284253	0.0297819	0.0203125	0.0214484	0.0135679	0.010684	0.00232975	0.00457585	0.00405738	0.0139266	0.00988404	0.0181135	0.015564	0.0161432	0.0141535	0.0148451	0.020727	0.0207455	0.023504
Neuron_74	0.0309319	0.0191556	0.0252977	0.017195	0.0741597	0.138857	0.232678	0.222647	0.209095	0.14178	0.123971	0.179008	0.221884	0.202988	0.251378	0.237811	0.223848	0.189492	0.171575	0.20279	0.229096	0.253994	0.231763	0.25282	0.253471	0.260244	0.24115	0.244927	0.23398	0.246079	0.231281	0.233523	0.229718	0.241043	0.233166	0.232705	0.230428	0.235599	0.241717	0.248822	0.254862	0.254469	0.261163	0.257246	0.259856	0.254429	0.260291	0.255707	0.259031
Neuron_75	0.071283	0.0613755	0.108578	0.0980872	0.101163	0.0778057	0.0276653	0.0640768	0.122305	0.172785	0.261159	0.213646	0.238106	0.176892	0.207823	0.184132	0.1884	0.186383	0.195245	0.187487	0.180595	0.175693	0.198158	0.192039	0.200249	0.174287	0.198163	0.189146	0.192259	0.181483	0.178735	0.191623	0.174207	0.182642	0.157363	0.168967	0.157818	0.167534	0.164576	0.170538	0.169991	0.173865	0.168613	0.177918	0.171147	0.18489	0.174663	0.186007	0.176455
Neuron_76	0.0952045	0.111292	0.16232	0.143345	0.226084	0.21996	0.190765	0.110259	0.0911353	0.118658	0.157201	0.218031	0.240345	0.229227	0.252258	0.243967	0.268054	0.254676	0.313558	0.313278	0.338415	0.330967	0.333561	0.330319	0.3415	0.362412	0.35942	0.371224	0.370113	0.376141	0.370533	0.369421	0.37415	0.377489	0.368797	0.358643	0.337487	0.342498	0.327185	0.329361	0.309488	0.312875	0.301729	0.299841	0.293318	0.295736	0.300206	0.302928	0.304251
Neuron_77	0.0604459	0.166123	0.192464	0.106486	0.0450845	0.0617428	0.0111128	0.0905101	0.0673269	0.0134949	0.116031	0.154355	0.229859	0.235067	0.227685	0.201399	0.207504	0.208442	0.240344	0.250251	0.228524	0.196163	0.157701	0.128651	0.132104	0.122688	0.133149	0.110913	0.135652	0.11755	0.126623	0.122225	0.139965	0.152642	0.15067	0.147731	0.147409	0.160935	0.164193	0.165733	0.166882	0.168397	0.164927	0.162837	0.160903	0.1701	0.169627	0.178114	0.166858
Neuron_78	0.00589272	0.0371775	0.0365619	0.188857	0.237896	0.238627	0.175006	0.154422	0.131437	0.15331	0.200871	0.242697	0.25246	0.284775	0.249904	0.270361	0.284418	0.3033	0.34126	0.377818	0.377679	0.365854	0.357439	0.361251	0.345396	0.341263	0.330011	0.324027	0.330017	0.313798	0.311914	0.312645	0.323076	0.318188	0.309369	0.30732	0.311162	0.316405	0.316114	0.310202	0.312334	0.308734	0.30549	0.297534	0.302269	0.303087	0.306882	0.304257	0.303379
Neuron_79	0.0833264	0.0819982	0.105323	0.0803376	0.048819	0.133554	0.197155	0.265997	0.261026	0.305457	0.376991	0.355982	0.316392	0.30723	0.351754	0.413681	0.419832	0.405256	0.410366	0.406094	0.38296	0.358144	0.351335	0.346467	0.350013	0.333718	0.325811	0.310567	0.298067	0.272492	0.256432	0.249913	0.24754	0.249078	0.24958	0.243647	0.2442	0.23996	0.247733	0.249835	0.260836	0.26604	0.275646	0.282439	0.284488	0.289102	0.291683	0.297564	0.296448
Neuron_80	0.0115329	0.000832033	0.00974967	0.0119824	0.0261423	0.0594828	0.0367057	0.0174398	0.0896281	0.0802325	0.129194	0.165269	0.174909	0.170718	0.135121	0.162374	0.152659	0.201735	0.202703	0.217465	0.176436	0.162436	0.138803	0.12747	0.115167	0.115925	0.124379	0.123881	0.111983	0.112916	0.116582	0.133535	0.134488	0.13766	0.148092	0.151415	0.169404	0.157568	0.175362	0.163649	0.173871	0.158706	0.162752	0.159375	0.164064	0.162646	0.16282	0.157826	0.159622
Neuron_81	0.00795321	0.0693183	0.153643	0.15214	0.233781	0.331952	0.357204	0.370352	0.239471	0.278751	0.369948	0.430917	0.497187	0.476012	0.47599	0.465069	0.467362	0.470994	0.488919	0.515999	0.530544	0.521978	0.518339	0.511505	0.513161	0.513389	0.517122	0.507918	0.511106	0.510123	0.518249	0.523332	0.519279	0.524805	0.516341	0.523647	0.515567	0.522766	0.525679	0.529795	0.525318	0.518363	0.514439	0.516016	0.514438	0.517984	0.514824	0.519505	0.515937
Neuron_82	0.0908104	0.0850986	0.177243	0.186519	0.190406	0.0999855	0.0667098	0.0516368	0.120006	0.164764	0.204238	0.244313	0.255226	0.281155	0.312448	0.334505	0.326575	0.318902	0.309643	0.302905	0.278605	0.277959	0.280001	0.290928	0.279441	0.256221	0.22709	0.216539	0.210573	0.21674	0.221626	0.218973	0.211617	0.193994	0.184265	0.173363	0.18087	0.180985	0.188098	0.183062	0.185239	0.182467	0.190935	0.193521	0.201837	0.204212	0.211158	0.212552	0.218165
Neuron_83	0.0403833	0.00619412	0.0615094	0.124895	0.142219	0.0255248	0.0427084	0.0254869	0.0380719	0.124216	0.168136	0.123848	0.0900949	0.066698	0.0511932	0.0193578	0.0208017	0.0495022	0.0481903	0.0269272	0.0063374	0.0282277	0.0129325	0.0232452	0.0234736	0.00915712	0.0103848	0.00706761	0.00760523	0.00541819	0.018182	0.0366076	0.025503	0.0243906	0.0126741	0.0259508	0.0131472	0.0214947	0.0152985	0.0195355	0.0094712	0.00611558	0.0020244	0.00436734	0.00782597	0.0121767	0.0102884	0.0101518	0.00945165
Neuron_84	0.0929959	0.158362	0.160379	0.0807404	0.032325	0.0169145	0.0112084	0.048743	0.00894678	0.00791463	0.00900468	0.0861329	0.154739	0.184931	0.145154	0.171234	0.147523	0.153243	0.154208	0.152309	0.159301	0.184365	0.190398	0.190936	0.165252	0.186431	0.164012	0.183393	0.178686	0.189319	0.187447	0.167915	0.158496	0.137705	0.145684	0.133123	0.134904	0.12586	0.130014	0.12581	0.130171	0.128781	0.137029	0.136291	0.146306	0.14035	0.151253	0.146768	0.15728
Neuron_85	0.0131824	0.0706385	0.0236981	0.0431129	0.0452598	0.0857202	0.0166528	0.0722073	0.0173025	0.0767381	0.128212	0.0804371	0.0161021	0.0344116	0.0697052	0.122006	0.113369	0.150522	0.189694	0.213851	0.193406	0.186332	0.216922	0.250703	0.265698	0.263566	0.255905	0.265056	0.269126	0.261936	0.246699	0.249266	0.251569	0.243801	0.22511	0.213455	0.214967	0.213702	0.206447	0.192482	0.190485	0.192011	0.191596	0.188097	0.187507	0.191384	0.194361	0.191534	0.190622
Neuron_86	0.0392021	0.0199916	0.0106645	0.0839325	0.119346	0.144847	0.106893	0.15123	0.210862	0.228448	0.140343	0.0884647	0.0462161	0.0810522	0.0788086	0.140599	0.135069	0.144448	0.122786	0.145353	0.135632	0.181854	0.198981	0.216312	0.204184	0.192033	0.19506	0.204783	0.216599	0.207616	0.201964	0.198882	0.204521	0.197572	0.211276	0.207844	0.232353	0.214368	0.221674	0.204139	0.221169	0.214895	0.2218	0.209791	0.209752	0.199322	0.197929	0.190304	0.191832
Neuron_87	0.0352291	0.0290027	0.100159	0.131013	0.185517	0.18944	0.165398	0.102556	0.138361	0.134944	0.150701	0.111555	0.097243	0.102401	0.12847	0.159804	0.151262	0.119628	0.118914	0.114334	0.104031	0.0927769	0.088465	0.0947639	0.0923455	0.0712021	0.0570617	0.0473345	0.0507975	0.0529063	0.0534651	0.0570276	0.0632928	0.0673486	0.0709847	0.0650214	0.0760975	0.0770038	0.0831722	0.0798839	0.0806978	0.0838415	0.085577	0.0874453	0.0824256	0.0820601	0.0827633	0.083168	0.0807486
Neuron_88	0.0317276	0.0396278	0.0672285	0.199091	0.225461	0.241031	0.278869	0.273284	0.195819	0.200536	0.189825	0.282881	0.302415	0.323088	0.274971	0.267147	0.293799	0.27728	0.274841	0.255626	0.269254	0.245785	0.212653	0.192848	0.175029	0.205022	0.170454	0.166097	0.140607	0.157118	0.163437	0.164275	0.177041	0.174504	0.189721	0.187675	0.183028	0.192687	0.192066	0.2086	0.198625	0.203761	0.197286	0.197733	0.203098	0.196206	0.203814	0.196503	0.205804
Neuron_89	0.073211	0.0848974	0.122888	0.108621	0.0866953	0.0721224	0.0872947	0.152149	0.073859	0.100678	0.0640562	0.0322576	0.048367	0.0427322	0.0590051	0.0557784	0.0976587	0.098733	0.121641	0.111134	0.130179	0.13058	0.135225	0.130278	0.123244	0.136008	0.134781	0.141439	0.130191	0.141538	0.141698	0.165001	0.157034	0.159673	0.145627	0.155882	0.143135	0.147302	0.138218	0.148972	0.140745	0.139586	0.126405	0.128473	0.128171	0.129843	0.127752	0.127541	0.131388
Neuron_90	0.00994301	0.0830415	0.114027	0.221673	0.218211	0.185338	0.219495	0.216503	0.189535	0.209701	0.216797	0.251717	0.212559	0.235855	0.198607	0.232242	0.217109	0.195716	0.181454	0.178173	0.181941	0.191273	0.18838	0.199046	0.193578	0.212518	0.200153	0.207546	0.20475	0.220322	0.22882	0.226988	0.232217	0.225298	0.23734	0.222301	0.225469	0.217	0.225248	0.224533	0.222999	0.219542	0.224299	0.222475	0.227446	0.219588	0.228882	0.223056	0.231057
Neuron_91	0.0699982	0.105164	0.0509291	0.0531971	0.0464524	0.0460352	0.0310332	0.014128	0.0163523	0.025997	0.010823	0.0136451	0.0445927	0.0188659	0.0213648	0.0109512	0.0173305	0.0231361	0.0202574	0.0253966	0.0114257	0.0141311	0.00812028	0.00505812	0.010332	0.00941621	0.0115274	0.00361471	0.00609996	0.00995473	0.012837	0.00741229	0.023386	0.0138389	0.0276937	0.0165921	0.0366958	0.0290722	0.0332004	0.025716	0.0272182	0.0302414	0.0276921	0.0272712	0.0207429	0.0215308	0.0187538	0.0176068	0.0157775
Neuron_92	0.0958162	0.150471	0.0882036	0.0211406	0.0271014	0.0231121	0.0107342	0.0733734	0.172472	0.145219	0.112713	0.0843317	0.0964901	0.167311	0.181963	0.205598	0.152976	0.117613	0.121737	0.0986386	0.112772	0.091902	0.102816	0.10465	0.104932	0.110902	0.108894	0.133385	0.120865	0.11749	0.100656	0.111383	0.115164	0.118015	0.112076	0.108524	0.110048	0.106312	0.100852	0.106241	0.109201	0.121108	0.114501	0.118169	0.114268	0.119635	0.123539	0.119808	0.123882
Neuron_93	0.0337127	0.108458	0.110098	0.0803868	0.0660438	0.0787114	0.166211	0.152641	0.0607223	0.0264007	0.0667452	0.0105468	0.0185586	0.0313618	0.075313	0.0909939	0.0629817	0.0440309	0.0195563	3.4407e-05	0.0307575	0.0209556	0.033965	0.0337125	0.065906	0.0902391	0.109683	0.0897273	0.0898827	0.0873123	0.0880673	0.08171	0.0819778	0.08839	0.087399	0.0803404	0.0764779	0.0768396	0.082718	0.0818996	0.0763734	0.074824	0.0679747	0.0733328	0.0662472	0.0722452	0.064077	0.0683674	0.0597581
Neuron_94	0.0973916	0.0686684	0.0961652	0.130671	0.1619	0.177416	0.100745	0.0788623	0.0445043	0.0640473	0.0658418	0.0585656	0.0725671	0.0240554	0.0158898	0.0385314	0.0560188	0.0476582	0.0472597	0.061579	0.0778468	0.0496784	0.0512808	0.0368399	0.053836	0.0175059	0.0402207	0.0248784	0.0381603	0.0138465	0.00125853	0.0130509	0.00672998	0.00942865	0.00986362	0.0156046	0.0127831	0.016424	0.019797	0.0168405	0.0170832	0.0046219	0.00860114	0.00355558	0.00424471	0.0102621	0.00335292	0.0166483	0.00944029
Neuron_95	0.0114265	0.0635361	0.0820819	0.0981947	0.202101	0.206424	0.23965	0.21825	0.272708	0.31245	0.301531	0.219203	0.205337	0.138571	0.157039	0.103164	0.138325	0.115161	0.125883	0.074752	0.0535662	0.0555311	0.0639216	0.0711801	0.0662974	0.0668244	0.0511684	0.0591919	0.0494941	0.057303	0.0647529	0.0927841	0.101765	0.122382	0.119814	0.148158	0.151245	0.179406	0.169261	0.186845	0.182158	0.192232	0.18232	0.182131	0.177679	0.174176	0.165482	0.154224	0.147085
Neuron_96	0.0686453	0.0416938	0.00437414	0.0294713	0.112616	0.179581	0.174546	0.147333	0.120103	0.0786332	0.138581	0.115757	0.125433	0.137599	0.163999	0.158045	0.14592	0.161076	0.134001	0.104292	0.108137	0.112127	0.120654	0.134446	0.148036	0.134746	0.132268	0.111485	0.113419	0.111107	0.123868	0.122002	0.125497	0.130555	0.120753	0.115862	0.116491	0.120701	0.124666	0.124665	0.127825	0.128816	0.132291	0.134014	0.129815	0.134466	0.131431	0.133916	0.12868
Neuron_97	0.0830868	0.0825278	0.089869	0.144916	0.160633	0.139172	0.0616799	0.000696567	0.0320037	0.051071	0.0888275	0.0452913	0.015973	0.0087662	0.0180224	0.0209438	0.0442964	0.045641	0.0851809	0.0858048	0.0693811	0.05668	0.0830152	0.112524	0.113768	0.12847	0.111051	0.114898	0.104468	0.103646	0.102882	0.107209	0.110033	0.090716	0.0880508	0.0719553	0.0765268	0.0678168	0.0703922	0.0616704	0.0584052	0.0544928	0.0523564	0.0533753	0.0562297	0.0535571	0.0568044	0.0524007	0.0565919
Neuron_98	0.0371108	0.0626465	0.0707969	0.0219644	0.0107561	0.10068	0.0859757	0.0966077	0.0490954	0.0813959	0.124863	0.0565872	0.052266	0.0173887	0.0222656	0.0291343	0.0637235	0.0646142	0.0495208	0.0272135	0.00666153	0.0239486	0.0288896	0.0356004	0.0374561	0.0489459	0.0547915	0.0430985	0.049875	0.0528789	0.052947	0.0463399	0.0382393	0.0368751	0.0351407	0.0373402	0.0364852	0.0402526	0.0437793	0.0387429	0.0373791	0.0418864	0.0472367	0.0512016	0.0523284	0.0553601	0.0525595	0.0555437	0.0527145
Neuron_99	0.0594513	0.0862448	0.0944538	0.146499	0.184669	0.15997	0.122178	0.181327	0.209831	0.230114	0.160925	0.139804	0.0975522	0.131925	0.114281	0.125923	0.116021	0.0985138	0.0599528	0.0658453	0.0576534	0.072202	0.0797017	0.102106	0.0962789	0.11577	0.117281	0.122206	0.124579	0.122539	0.134324	0.128652	0.142136	0.127069	0.134001	0.128848	0.134812	0.124098	0.12806	0.123239	0.131893	0.125554	0.13399	0.127568	0.137195	0.130439	0.133999	0.129099	0.132688
Neuron_100	0.036321	0.0487081	0.072374	0.0549764	0.0708017	0.0626077	0.0883778	0.127601	0.173492	0.184823	0.10065	0.081867	0.10744	0.0495118	0.0551235	0.0180918	0.055048	0.00292067	0.0125186	0.00930764	0.00522999	0.014508	0.0282097	0.0233179	0.0110949	0.000105703	0.00745825	0.00638878	0.0279629	0.0386917	0.0312283	0.0350313	0.0367057	0.053032	0.0465902	0.0619302	0.048617	0.0665173	0.0441528	0.0494865	0.0390667	0.0474986	0.0422776	0.0418372	0.0406333	0.0375001	0.0365554	0.036752	0.0342814
Neuron_101	0.00360116	0.0554841	0.00880539	0.0762136	0.0332188	0.0314783	0.0381349	0.0288757	0.000210498	0.0100836	0.0234781	0.0833951	0.0911396	0.0754539	0.0727359	0.0356536	0.0730023	0.014464	0.0419577	0.0179585	0.0709699	0.049086	0.0700224	0.0505678	0.0586673	0.0566952	0.0733583	0.0887594	0.0995472	0.105898	0.105744	0.105328	0.106353	0.105204	0.100482	0.11234	0.0975279	0.10973	0.083865	0.10825	0.0843893	0.101712	0.0782628	0.0920332	0.0801251	0.0874525	0.0793879	0.0843716	0.0818637
Neuron_102	0.0266333	0.0375018	0.0251169	0.0344936	0.063596	0.0238388	0.0468533	0.0100479	0.0986961	0.140523	0.142012	0.127814	0.106632	0.0440611	0.048827	0.0473651	0.0767439	0.117571	0.141238	0.133314	0.123637	0.0941508	0.10938	0.110395	0.137243	0.127299	0.130774	0.137717	0.127985	0.130556	0.122162	0.140542	0.134851	0.133383	0.123878	0.136278	0.141637	0.15035	0.138236	0.144508	0.136354	0.143137	0.130429	0.140764	0.136452	0.144319	0.134146	0.132495	0.12822
Neuron_103	0.0824479	0.0864788	0.132713	0.138339	0.171228	0.289412	0.283022	0.22993	0.16818	0.204876	0.269447	0.245896	0.264738	0.244948	0.282241	0.261315	0.243056	0.223594	0.233329	0.234547	0.244146	0.232419	0.24842	0.258862	0.267086	0.259946	0.245415	0.251694	0.255035	0.266454	0.25391	0.259906	0.251101	0.262448	0.24283	0.246052	0.234181	0.249369	0.243791	0.252118	0.244953	0.256118	0.253461	0.261358	0.255997	0.262753	0.262252	0.265255	0.264042
Neuron_104	0.0560882	0.129996	0.0905105	0.0931177	0.0908572	0.0603852	0.089784	0.0148064	0.0287307	0.0255079	0.116366	0.10994	0.122908	0.0606818	0.0904576	0.0604521	0.0817072	0.0350323	0.0453552	0.0352139	0.0584793	0.0501503	0.0650745	0.0844663	0.102705	0.11157	0.128687	0.148135	0.162695	0.190217	0.187514	0.201374	0.183362	0.200601	0.175633	0.186036	0.161441	0.174259	0.156871	0.165579	0.144124	0.148996	0.137316	0.145199	0.135889	0.139862	0.135808	0.14066	0.139663
Neuron_105	0.062995	0.0652648	0.0299807	0.00700091	0.0504285	0.112665	0.206509	0.233324	0.204777	0.158808	0.143566	0.116946	0.179329	0.180593	0.226175	0.166426	0.154151	0.173134	0.186918	0.192577	0.235762	0.250106	0.282119	0.250813	0.258406	0.251977	0.280342	0.291268	0.283222	0.291293	0.279805	0.279855	0.267193	0.276125	0.271425	0.279522	0.264969	0.263211	0.250403	0.25701	0.249196	0.255786	0.245653	0.250445	0.236885	0.245249	0.236527	0.244599	0.242553
Neuron_106	0.0794923	0.0497393	0.0703188	0.0807302	0.0688756	0.113755	0.100051	0.11491	0.145361	0.151714	0.177299	0.233836	0.144365	0.148107	0.10673	0.11879	0.102831	0.133243	0.143181	0.168035	0.155259	0.175875	0.1475	0.183969	0.160697	0.191896	0.189499	0.207929	0.211172	0.215345	0.218679	0.207944	0.212439	0.20563	0.214862	0.206622	0.214173	0.198243	0.207607	0.192328	0.201197	0.184134	0.198205	0.183117	0.197002	0.181163	0.193505	0.181432	0.190166
Neuron_107	0.0610724	0.10325	0.102671	0.159412	0.0560037	0.0348805	0.20479	0.197517	0.236008	0.200116	0.20185	0.173927	0.207523	0.208166	0.25069	0.209355	0.202627	0.180178	0.222069	0.212701	0.227817	0.225682	0.237956	0.235046	0.24959	0.255472	0.269989	0.268937	0.264264	0.259685	0.250309	0.252569	0.240561	0.251835	0.241551	0.247741	0.231466	0.238276	0.22682	0.233188	0.223807	0.233476	0.227155	0.233328	0.224959	0.230835	0.227827	0.232915	0.22918
Neuron_108	0.0786999	0.0569633	0.103249	0.120352	0.192062	0.179766	0.144115	0.169721	0.1736	0.185341	0.227846	0.251705	0.2346	0.141447	0.118537	0.106499	0.107471	0.100112	0.0867541	0.0527155	0.0366602	0.0282592	0.011699	0.0142163	0.00823199	0.0204602	0.0409345	0.0336683	0.0458183	0.0471291	0.0638197	0.0701409	0.0754326	0.0843295	0.0888946	0.0878704	0.0774777	0.0773965	0.0781329	0.0777847	0.0732837	0.0683518	0.0661785	0.0681787	0.0658139	0.0689337	0.0666357	0.0739715	0.0694338
Neuron_109	0.0638215	0.0263119	0.0209591	0.109445	0.153152	0.164271	0.117926	0.166067	0.188231	0.12557	0.0867515	0.104393	0.152234	0.208833	0.199259	0.178951	0.139745	0.141979	0.115498	0.118513	0.113818	0.14123	0.14035	0.160286	0.166317	0.15941	0.158822	0.161607	0.164566	0.173362	0.183782	0.199321	0.196238	0.192888	0.184922	0.178964	0.18617	0.175361	0.177204	0.170377	0.179005	0.170216	0.168397	0.1625	0.16612	0.165553	0.16727	0.164555	0.167927
Neuron_110	0.070339	0.0472573	0.0716649	0.142195	0.25967	0.237026	0.222941	0.266885	0.268913	0.259693	0.267175	0.359909	0.323435	0.353844	0.299824	0.31194	0.319661	0.369448	0.367542	0.394137	0.3986	0.391451	0.360189	0.343031	0.325028	0.326901	0.308919	0.285655	0.264136	0.259984	0.25084	0.2337	0.240341	0.230354	0.25399	0.239173	0.260643	0.253276	0.280822	0.276416	0.287779	0.28401	0.294485	0.29326	0.301452	0.297879	0.305613	0.300575	0.304816
Neuron_111	0.0415864	0.112064	0.164193	0.0868107	0.039756	0.0639546	0.0139021	0.0245177	0.0303821	0.0317685	0.0186359	0.0164595	0.0177538	0.0620896	0.0519096	0.0582048	0.0208924	0.0317481	0.0567392	0.0746048	0.074253	0.0610259	0.0650089	0.0699931	0.0776644	0.0729198	0.0574544	0.0423847	0.0345861	0.0314901	0.0367532	0.0339771	0.0452376	0.040408	0.043578	0.0334892	0.0413144	0.0449402	0.0565181	0.0575575	0.0607859	0.0587697	0.0626359	0.0588084	0.0602256	0.0586089	0.0620419	0.05872	0.0560715
Neuron_112	0.0914214	0.130268	0.125944	0.084191	0.0779335	0.0784535	0.0478804	0.170737	0.233918	0.245751	0.106968	0.0858955	0.0882462	0.139781	0.133745	0.130259	0.140053	0.165	0.151876	0.145719	0.128794	0.163776	0.173099	0.181851	0.159105	0.160314	0.14695	0.153705	0.144016	0.148598	0.153862	0.152726	0.155276	0.140695	0.149171	0.153652	0.168215	0.168934	0.167038	0.164944	0.171018	0.168873	0.175412	0.167123	0.176972	0.167386	0.17249	0.162118	0.166314
Neuron_113	0.0151428	0.0115358	0.035451	0.049969	0.080263	0.0670336	0.0191912	0.0225727	0.00822997	0.037006	0.0131689	0.03614	0.0246108	0.0502253	0.00697171	0.0294347	0.0234576	0.0217042	0.0225075	0.000823362	0.0122463	0.0188111	0.0312039	0.029427	0.0622305	0.0619884	0.0998893	0.0926014	0.117012	0.111795	0.117342	0.12117	0.1147	0.12691	0.112523	0.119015	0.0948369	0.0961723	0.0818389	0.0812313	0.0711641	0.06869	0.0611177	0.0626623	0.053249	0.0610194	0.0510359	0.0645233	0.0556811
Neuron_114	0.0223026	0.052557	0.00555945	0.0711377	0.141616	0.157198	0.0832745	0.089614	0.0161196	0.0359948	0.0565511	0.00412462	0.0058007	0.0428119	0.0183818	0.0125438	0.0182462	0.0199167	0.0360751	0.00803423	0.00798799	0.0279793	0.0159544	0.000137649	0.0162739	0.020404	0.0115608	0.00875897	0.0109661	0.0112038	0.0292832	0.0466926	0.0549948	0.0659202	0.0567498	0.0639844	0.0528058	0.0640764	0.0551293	0.0558558	0.0466244	0.0439312	0.0375503	0.0374695	0.0318327	0.0311873	0.024444	0.0245816	0.0186796
Neuron_115	0.0765867	0.117408	0.042639	0.0194147	0.0109914	0.0121743	0.044563	0.0356694	0.0954238	0.105337	0.0873661	0.0322164	0.0727392	0.0955735	0.158414	0.162822	0.207252	0.219299	0.216926	0.204273	0.184753	0.187032	0.195314	0.195734	0.199105	0.182299	0.188255	0.169773	0.16591	0.15393	0.153734	0.161263	0.170669	0.175101	0.173314	0.178501	0.186094	0.189608	0.189808	0.19214	0.197906	0.201992	0.1984	0.19781	0.194386	0.199266	0.190174	0.191293	0.184283
Neuron_116	0.026511	0.006091	0.0631923	0.0844554	0.203281	0.215088	0.179275	0.0430354	0.023149	0.00226943	0.0265199	0.0186716	0.0325825	8.4298e-05	0.0395246	0.103523	0.108954	0.100991	0.0687284	0.0788084	0.0641444	0.075788	0.0498709	0.0565371	0.0325369	0.0208835	0.00781616	0.00791432	0.00656135	0.0135145	0.00969147	0.0540433	0.0526117	0.0713618	0.0628899	0.0727741	0.0680892	0.0777043	0.0726882	0.0864143	0.0763937	0.079879	0.0565151	0.0592702	0.0471777	0.0511058	0.0405439	0.0357442	0.031628
Neuron_117	0.0716696	0.0827597	0.120946	0.142647	0.156563	0.138839	0.0789649	0.0255752	0.0221137	0.0786511	0.0879418	0.119114	0.109945	0.142806	0.106687	0.0805576	0.0775819	0.0729037	0.0669431	0.0647362	0.0325629	0.0165281	0.0132663	0.00239998	0.0112259	0.00214571	0.00703018	0.00240566	0.00522327	0.00634019	0.0111026	0.00645155	0.0215414	0.0156352	0.0108797	0.00479422	0.00305471	0.00525983	0.00678495	0.0133592	0.0117672	0.0171734	0.00992685	0.0178081	0.00588112	0.00880491	0.00464723	0.00128266	0.0059832
Neuron_118	0.00704651	0.0625919	0.107425	0.150273	0.176646	0.204064	0.247565	0.25771	0.229853	0.205626	0.204622	0.215105	0.258021	0.265582	0.30526	0.281266	0.319951	0.307765	0.33859	0.324253	0.30523	0.304135	0.308733	0.325755	0.31006	0.31543	0.298158	0.29093	0.280724	0.264237	0.26736	0.271704	0.27956	0.280514	0.277144	0.290605	0.280576	0.29503	0.287558	0.30256	0.304773	0.311326	0.313501	0.310758	0.315851	0.312325	0.313485	0.310586	0.308361
Neuron_119	0.0649753	0.0939253	0.170145	0.177826	0.102092	0.0802968	0.0863583	0.121873	0.148059	0.190799	0.165069	0.0833661	0.048411	0.00493406	0.0170425	0.0361858	0.0123763	0.029063	0.0379984	0.0779303	0.110513	0.100727	0.0882476	0.0728678	0.0786556	0.061687	0.0557144	0.05414	0.0452009	0.0382821	0.0232947	0.0226097	0.0275442	0.0254099	0.0250748	0.0137594	0.0197481	0.013671	0.0161798	0.0142515	0.0171913	0.0170032	0.0123971	0.0115215	0.00796481	0.0124568	0.0144954	0.0170493	0.0184086
Neuron_120	0.0650414	0.0275803	0.0097024	0.0219974	0.0240601	0.0306261	0.0977436	0.0715393	0.0989126	0.0462054	0.0398626	0.018127	0.0605439	0.0697791	0.064947	0.0524154	0.0627797	0.100594	0.127874	0.176832	0.192204	0.204755	0.188262	0.185373	0.17916	0.204743	0.219767	0.231301	0.224953	0.200923	0.193343	0.186353	0.182738	0.171497	0.158207	0.153869	0.140081	0.130306	0.123732	0.117907	0.126774	0.114106	0.115119	0.105022	0.114255	0.115039	0.121046	0.123668	0.126215
Neuron_121	0.093567	0.0363508	0.0988751	0.10432	0.139642	0.0679889	0.00528202	0.00209039	0.0125445	0.0259715	0.0221137	0.0898393	0.129913	0.0984628	0.0306104	0.0142301	0.0327385	0.0487475	0.0613965	0.0128702	0.0329881	0.0178748	0.0566384	0.00636529	0.0173138	0.00493849	0.0116316	0.000799312	0.00742989	0.00627109	0.0269741	0.020667	0.0114602	0.00774692	0.00245015	0.00956589	0.0181196	0.0187865	0.0167817	0.0291139	0.0216798	0.0301803	0.0147276	0.036599	0.0279438	0.0405772	0.0247301	0.0335538	0.0282016
Neuron_122	0.0761026	0.140088	0.249258	0.278042	0.284974	0.260342	0.256826	0.219486	0.188601	0.167705	0.209358	0.174733	0.207405	0.135978	0.129925	0.0818859	0.0813375	0.0784761	0.0702777	0.0696475	0.0644974	0.0448707	0.0590815	0.0263863	0.0476291	0.0359294	0.0492014	0.0493954	0.0548912	0.0789984	0.0777938	0.106827	0.0912461	0.113175	0.102463	0.123076	0.112375	0.12354	0.118815	0.125841	0.116477	0.118034	0.106493	0.115873	0.105476	0.11523	0.102048	0.108126	0.102067
Neuron_123	0.0925625	0.0060737	0.00665511	0.00409862	0.00140678	0.0104362	0.0510159	0.0416899	0.0460691	0.0557366	0.00426165	0.0427473	0.013511	0.0723031	0.0155917	0.00160589	0.0383336	0.02755	0.0239206	0.000385986	0.0093116	0.0145815	0.0355142	0.0514675	0.0569458	0.0374871	0.0406973	0.0329737	0.0389574	0.0416104	0.0469128	0.0681709	0.0482017	0.0632232	0.0361885	0.0553849	0.0370566	0.0436712	0.0303098	0.0359549	0.0276815	0.0287108	0.0208349	0.0271686	0.0190246	0.025745	0.0151954	0.0208853	0.0177102
Neuron_124	0.0473516	0.0711635	0.115727	0.14485	0.195467	0.119037	0.132756	0.174626	0.158604	0.154635	0.161009	0.180377	0.209149	0.229353	0.222296	0.208687	0.180021	0.190212	0.212504	0.205089	0.178328	0.163854	0.17113	0.168205	0.169162	0.164568	0.197007	0.203754	0.205083	0.199259	0.211722	0.227158	0.234899	0.235922	0.237449	0.243708	0.241363	0.233391	0.228884	0.231533	0.229177	0.226207	0.219243	0.219261	0.215827	0.217632	0.214741	0.216005	0.214554
Neuron_125	0.0884133	0.0241441	0.0302724	0.0466565	0.0882015	0.0609014	0.0608927	0.0655133	0.000226481	0.0209577	0.0599833	0.0818492	0.0897971	0.0556589	0.108072	0.0702367	0.0804326	0.0593533	0.0927655	0.0946609	0.104009	0.0787621	0.070764	0.0659287	0.0498446	0.0442391	0.0312855	0.0391431	0.0413487	0.0338809	0.026919	0.0226921	0.0263714	0.034888	0.0269619	0.0418169	0.0278056	0.0476798	0.0315564	0.0442919	0.0323527	0.0409468	0.0348143	0.0356467	0.0328468	0.0354289	0.0368903	0.0389212	0.0366452
Neuron_126	0.0773848	0.108482	0.164298	0.221923	0.254406	0.255568	0.218881	0.205563	0.225621	0.266767	0.299145	0.237686	0.195394	0.214706	0.256359	0.272618	0.260657	0.310066	0.298429	0.297693	0.297792	0.318347	0.324727	0.343852	0.346464	0.359814	0.363656	0.360163	0.34713	0.355298	0.360918	0.364054	0.364297	0.369776	0.368046	0.366925	0.366347	0.362855	0.366909	0.360492	0.361654	0.354151	0.358849	0.349985	0.348409	0.343406	0.343871	0.338483	0.338866
Neuron_127	0.0495839	0.118479	0.196056	0.181552	0.187549	0.243057	0.200063	0.199015	0.123265	0.190099	0.150582	0.182356	0.142124	0.173559	0.192862	0.211029	0.233465	0.229428	0.266247	0.293277	0.334949	0.35315	0.348925	0.35372	0.338993	0.332477	0.303585	0.306668	0.303575	0.288411	0.272412	0.234459	0.241995	0.230377	0.234344	0.220836	0.221086	0.228007	0.222641	0.226367	0.226223	0.234439	0.242442	0.238198	0.241688	0.23616	0.246477	0.2451	0.247697
Neuron_128	0.0967027	0.000252512	0.0686418	0.0977979	0.190304	0.198033	0.171883	0.15693	0.134385	0.22254	0.140275	0.0663833	0.0912236	0.117457	0.138992	0.142122	0.153067	0.182692	0.148243	0.150902	0.10475	0.110616	0.0964462	0.119614	0.103584	0.115388	0.0994864	0.0901281	0.08053	0.0783575	0.0927375	0.0903459	0.11459	0.108638	0.115856	0.108158	0.118906	0.112208	0.121582	0.109568	0.123992	0.113764	0.126294	0.108844	0.118763	0.110676	0.115902	0.107735	0.110253
Neuron_129	0.0678449	0.0350228	0.0306684	0.00657252	0.0612718	0.0593884	0.0227066	0.00196056	0.0693893	0.0631511	0.0265942	0.0852623	0.100497	0.119632	0.134314	0.148752	0.150401	0.149199	0.137897	0.120449	0.103508	0.128489	0.0958881	0.0892603	0.0610248	0.0649126	0.0359896	0.0367499	0.0097622	0.0159932	0.0102142	0.0213746	0.0138059	0.0184965	0.021842	0.0270369	0.030557	0.0359193	0.0448325	0.0516324	0.0602329	0.0591438	0.0680472	0.0651043	0.0754867	0.0664654	0.0757879	0.0679852	0.0767733
Neuron_130	0.00440513	0.0381209	0.0312283	0.173987	0.160225	0.126525	0.0671211	0.0554416	0.0463032	0.0499682	0.0554065	0.0700186	0.137172	0.130908	0.163585	0.153535	0.195496	0.202658	0.196902	0.18591	0.16976	0.1827	0.173641	0.167292	0.152821	0.152599	0.150344	0.132712	0.11996	0.116324	0.116784	0.128757	0.115815	0.123386	0.106689	0.117048	0.0980713	0.103224	0.0959913	0.103723	0.101521	0.0983469	0.0979717	0.0989053	0.104007	0.106781	0.106982	0.110916	0.112446
Neuron_131	0.0530058	0.00996479	0.0296046	0.0271358	0.107939	0.169716	0.124092	0.0261491	0.076846	0.0799818	0.0673362	0.0674896	0.0485638	0.0645636	0.104262	0.149395	0.144933	0.133796	0.102596	0.102193	0.0858225	0.092522	0.066771	0.0571292	0.0353555	0.0251617	0.0165307	0.0185027	0.0107826	0.0123569	0.00529833	0.00166435	0.0140642	0.00624719	0.00714673	0.0172375	0.0251078	0.0214982	0.0254098	0.0241129	0.029851	0.028737	0.0394039	0.0423036	0.04547	0.0383256	0.041284	0.0394397	0.0442825
Neuron_132	0.0777342	0.0599733	0.0120184	0.0042829	0.063342	0.043772	0.00968091	0.0697978	0.126985	0.0896508	0.0463515	0.0506159	0.0468302	0.0639634	0.0582869	0.126754	0.129414	0.144081	0.125	0.14646	0.146825	0.166966	0.166927	0.184976	0.190432	0.205546	0.189233	0.190769	0.171011	0.171198	0.157375	0.150202	0.142036	0.127151	0.133185	0.117107	0.123761	0.107463	0.114482	0.107622	0.115996	0.111834	0.121211	0.12247	0.132114	0.126665	0.13458	0.130056	0.138537
Neuron_133	0.094018	0.128373	0.105272	0.0286739	0.00158188	0.0101224	0.0156599	0.0272136	0.042464	0.0124933	0.0750258	0.125628	0.155511	0.174822	0.202323	0.190682	0.207966	0.216138	0.234018	0.263264	0.27296	0.287243	0.268167	0.274196	0.254087	0.256765	0.239154	0.232237	0.211441	0.205868	0.19805	0.188245	0.178882	0.169061	0.159456	0.155624	0.151694	0.157332	0.163716	0.170361	0.173498	0.172041	0.181467	0.18167	0.192276	0.191631	0.201311	0.200094	0.205226
Neuron_134	0.0844554	0.157936	0.141767	0.115567	0.0647593	0.0289956	0.0338772	0.0576143	0.162608	0.120358	0.135716	0.078475	0.0625297	0.0776409	0.120151	0.0969029	0.095274	0.0978495	0.103344	0.0707927	0.0890501	0.0782943	0.0968386	0.116834	0.116262	0.109381	0.0981253	0.117228	0.11631	0.131584	0.112063	0.120637	0.105093	0.113078	0.0877935	0.0976596	0.0895661	0.098315	0.0794388	0.0800454	0.0702309	0.0834827	0.0788314	0.082827	0.0775125	0.0840936	0.0856621	0.0842096	0.0882305
Neuron_135	0.0534982	0.0375522	0.147046	0.166712	0.176228	0.122474	0.0921202	0.145135	0.17228	0.189422	0.251694	0.265199	0.268155	0.25842	0.2648	0.30683	0.314616	0.347863	0.346788	0.356392	0.363188	0.391677	0.399422	0.411557	0.427345	0.438426	0.427967	0.416003	0.405336	0.410719	0.411555	0.411943	0.387885	0.385029	0.370884	0.369835	0.35861	0.364217	0.367267	0.367213	0.365684	0.363062	0.368816	0.37404	0.378365	0.377882	0.379942	0.379477	0.381395
Neuron_136	0.0337768	0.120162	0.112204	0.0493884	0.030016	0.0347584	0.0310205	0.0328581	0.0226852	0.00737496	0.027481	0.00548386	0.0146632	0.0299915	0.0716258	0.041272	0.0238638	0.0473744	0.0347255	0.0416664	0.00664325	0.0251515	0.00430305	0.0257458	0.00637051	0.0174158	0.021646	0.0237503	0.0344094	0.0389768	0.0276974	0.0227607	0.00692573	0.0139591	0.0064968	0.0101648	0.000816583	0.00698533	1.29329e-05	0.00530527	0.00485555	0.00751416	0.000649603	0.0150612	0.00410156	0.0131487	0.00668362	0.0136298	0.00975693
Neuron_137	0.0982729	0.117039	0.155812	0.214226	0.184976	0.230823	0.185505	0.188463	0.0816313	0.118725	0.160923	0.199395	0.260501	0.203172	0.196417	0.175618	0.210371	0.205829	0.220658	0.221441	0.218819	0.228733	0.209455	0.210612	0.179623	0.191768	0.16487	0.168035	0.162801	0.17059	0.183756	0.190525	0.18707	0.199163	0.192844	0.215573	0.204285	0.223182	0.219069	0.228911	0.226083	0.221251	0.220521	0.216034	0.220911	0.214979	0.215302	0.211873	0.214349
Neuron_138	0.00737932	0.0190131	0.0225662	0.044027	0.0280565	0.0352534	0.0150816	0.00478713	0.110663	0.213438	0.207849	0.194924	0.213792	0.182104	0.180842	0.158343	0.190232	0.185255	0.184929	0.155477	0.121922	0.0934355	0.0982495	0.0903749	0.0927626	0.0593446	0.0326937	0.00309602	0.0160142	0.0262586	0.0335266	0.0332423	0.0466878	0.0557549	0.0662549	0.0554187	0.0504017	0.0308526	0.0314727	0.0148697	0.0130055	0.000695412	0.00107761	0.0154731	0.0222092	0.0312971	0.0282899	0.0311383	0.0282529
Neuron_139	0.0522019	0.146208	0.0597925	0.0623663	0.0579002	0.0553642	0.0304934	0.0784952	0.103468	0.0983438	0.0979749	0.16265	0.229466	0.292106	0.31773	0.312368	0.310943	0.300007	0.319762	0.313954	0.334494	0.315151	0.296231	0.24566	0.232502	0.205712	0.196928	0.171756	0.155736	0.139554	0.119847	0.102843	0.0812914	0.0787227	0.0704098	0.0657221	0.0578624	0.0623667	0.0641121	0.0751782	0.0757932	0.0887227	0.0911317	0.106103	0.10655	0.120039	0.125522	0.139059	0.139996
Neuron_140	0.0752529	0.0998843	0.0914439	0.103194	0.054558	0.0898742	0.0313561	0.00100012	0.0599149	0.00471008	0.0166276	0.00517595	0.0441871	0.0958319	0.0675367	0.0882002	0.111082	0.128499	0.124889	0.11389	0.147174	0.146085	0.190495	0.184417	0.219051	0.217095	0.209806	0.195049	0.169925	0.179864	0.1694	0.174557	0.157999	0.142404	0.133137	0.122097	0.12211	0.117581	0.118591	0.125087	0.118581	0.12772	0.115343	0.131389	0.127039	0.138374	0.132819	0.134764	0.138065
Neuron_141	0.00473594	0.0117213	0.0251418	0.0413629	0.052769	0.105257	0.130814	0.0742124	0.0258128	0.000340543	0.0167027	0.0807365	0.150614	0.106261	0.10037	0.0815899	0.110439	0.0855167	0.117687	0.126751	0.14632	0.0988833	0.0720177	0.02275	0.0452131	0.013761	0.0103056	0.0103272	0.00229228	0.0241751	0.0406869	0.0516512	0.0462752	0.037417	0.0342629	0.0340021	0.0342222	0.0204545	0.0251468	0.0135538	0.0171697	0.00328502	0.0111682	0.00098794	0.00903761	0.00370604	0.00160493	0.0100102	0.000440757
Neuron_142	0.0889188	0.000135839	0.0754808	0.0250032	0.0920984	0.0889434	0.0648997	0.144884	0.147967	0.0586965	0.00813989	0.0467886	0.0700725	0.112984	0.136244	0.117902	0.103701	0.0881069	0.130019	0.147732	0.167545	0.140534	0.134004	0.116681	0.12561	0.115606	0.103924	0.0981979	0.104853	0.108555	0.107689	0.097963	0.111888	0.0971551	0.0920979	0.0653446	0.068194	0.0752705	0.0755132	0.0773309	0.0650647	0.0725335	0.0642279	0.0689574	0.066491	0.0747533	0.0806979	0.0852249	0.0848946
Neuron_143	0.0167423	0.00649281	0.0224621	0.0288593	0.0712951	0.0755907	0.105834	0.146132	0.0984949	0.0984704	0.120951	0.18267	0.19682	0.219658	0.23425	0.261418	0.264407	0.292136	0.273454	0.293348	0.287625	0.301777	0.284846	0.291197	0.27305	0.268298	0.277251	0.277146	0.273644	0.260282	0.273212	0.256766	0.265724	0.2497	0.262674	0.253952	0.260901	0.239641	0.244983	0.23783	0.246942	0.230854	0.238446	0.229976	0.23881	0.232707	0.236784	0.23594	0.240683
Neuron_144	0.0478899	0.021517	0.00318686	0.061075	0.0421576	0.0820399	0.10061	0.0305021	0.0350943	0.114597	0.164713	0.197883	0.180502	0.153249	0.14873	0.19351	0.202786	0.18074	0.193095	0.209851	0.231855	0.246063	0.251259	0.265684	0.269705	0.287479	0.274829	0.290889	0.290034	0.29684	0.28895	0.283852	0.277852	0.267409	0.2663	0.250838	0.244195	0.239388	0.237392	0.233842	0.22703	0.225261	0.224837	0.225248	0.229507	0.224416	0.23204	0.230676	0.237794
Neuron_145	0.0144209	0.0474608	0.066482	0.0940988	0.175172	0.230842	0.230563	0.168149	0.115855	0.0709765	0.0384357	0.0160666	0.0739293	0.0896191	0.109747	0.0628798	0.00264363	0.0141253	0.00595566	0.0320188	0.056191	0.0923661	0.11406	0.104374	0.116248	0.103886	0.143716	0.148133	0.180825	0.16434	0.179594	0.176635	0.18239	0.180244	0.17102	0.16749	0.161261	0.154316	0.148218	0.142379	0.145193	0.140678	0.132663	0.12765	0.118722	0.126698	0.11894	0.128377	0.119335
Neuron_146	0.032614	0.0328738	0.0357986	0.0309207	0.0414184	0.112291	0.100127	0.149907	0.155746	0.154729	0.122366	0.114635	0.0630753	0.0268518	0.0167713	0.0423455	0.0486486	0.0465777	0.0102663	0.0154118	0.029458	0.0153434	0.0261351	0.0278559	0.0170849	0.00110332	0.00572398	0.00311433	0.0147484	0.0232	0.0362912	0.0300254	0.0414976	0.0463546	0.0615913	0.0617106	0.0646244	0.0645878	0.071032	0.0632202	0.0646656	0.0582731	0.0650393	0.0599077	0.0598033	0.0527361	0.0500953	0.0503018	0.0467095
Neuron_147	0.0553763	0.135717	0.113526	0.0926671	0.130294	0.187856	0.2487	0.221463	0.241532	0.189449	0.148211	0.116048	0.0823285	0.0804789	0.109737	0.130052	0.151847	0.161013	0.187267	0.166396	0.184265	0.193257	0.197235	0.193624	0.188212	0.170872	0.166773	0.146903	0.143792	0.128976	0.127525	0.117527	0.118417	0.130505	0.138374	0.147907	0.14838	0.158662	0.15803	0.167546	0.163391	0.173638	0.17182	0.176866	0.16776	0.166908	0.161418	0.163626	0.158474
Neuron_148	0.0858962	0.0714649	0.0305071	0.0340573	0.0487979	0.163184	0.18333	0.239189	0.250169	0.234135	0.196326	0.210899	0.224677	0.281861	0.286665	0.253153	0.208373	0.220211	0.22601	0.28137	0.31113	0.360005	0.356948	0.367728	0.351857	0.354988	0.381233	0.394876	0.404824	0.381859	0.379176	0.357798	0.357839	0.346889	0.352023	0.350128	0.355176	0.34206	0.342217	0.336508	0.350619	0.344285	0.352921	0.342233	0.34853	0.34359	0.3474	0.345644	0.345653
Neuron_149	0.0562951	0.0571625	0.0467149	0.0951893	0.104172	0.136917	0.106368	0.10364	0.0576863	0.126116	0.109251	0.146251	0.145107	0.130847	0.109507	0.0449779	0.00608199	0.0212489	0.0146628	0.0240697	0.00192793	0.0243142	0.00332371	0.0244066	0.0149049	0.0261519	0.0166424	0.0231187	0.0242672	0.0384995	0.0597107	0.0633757	0.0680422	0.0647788	0.066076	0.0651247	0.0716407	0.0799496	0.0873945	0.0849228	0.0888081	0.0753482	0.0832246	0.0723202	0.082362	0.0737126	0.079289	0.0715951	0.0726387
Neuron_150	0.0469401	0.10938	0.0640707	0.0520521	0.101846	0.0635055	0.0286959	0.0711786	0.0178675	0.0423327	0.159157	0.171076	0.232172	0.211496	0.217918	0.174843	0.210124	0.196708	0.252702	0.241084	0.260252	0.251393	0.259739	0.261047	0.264602	0.265389	0.256882	0.245574	0.230616	0.223681	0.20787	0.21907	0.2004	0.199659	0.173352	0.181454	0.169766	0.189692	0.182935	0.204256	0.196623	0.212298	0.199216	0.213365	0.212184	0.22475	0.221394	0.223465	0.219787
Neuron_151	0.029725	0.0481431	0.0643843	0.0852294	0.0590121	0.00463987	0.0100602	0.0614704	0.0501617	0.0672687	0.0523235	0.139683	0.0970053	0.109858	0.094407	0.115283	0.102866	0.110279	0.115948	0.116174	0.0971164	0.107471	0.0911414	0.116505	0.0954248	0.101776	0.0793314	0.0863612	0.0686109	0.0649061	0.0667231	0.0576305	0.066617	0.0488739	0.0605313	0.0478541	0.0608769	0.0542088	0.0675895	0.0678536	0.0777977	0.0701662	0.0812987	0.0738732	0.0874555	0.0766655	0.0888164	0.0788232	0.0864429
Neuron_152	0.0769806	0.0658304	0.0813279	0.125375	0.167709	0.150053	0.159664	0.102794	0.0822129	0.188184	0.185137	0.177825	0.122543	0.194465	0.196867	0.232412	0.257721	0.266558	0.267781	0.264822	0.271301	0.278457	0.285723	0.301673	0.282528	0.291694	0.275408	0.274856	0.273778	0.272186	0.273814	0.257623	0.269607	0.252718	0.25865	0.241551	0.246321	0.241498	0.239259	0.233188	0.228079	0.228342	0.231211	0.224207	0.231948	0.225477	0.23617	0.230073	0.238295
Neuron_153	0.0583519	0.0038731	0.0562309	0.0480007	0.114352	0.169764	0.282257	0.279031	0.23199	0.188567	0.171817	0.151503	0.18402	0.177273	0.178552	0.155775	0.181672	0.136325	0.129157	0.110791	0.129262	0.104006	0.107363	0.106244	0.129436	0.116991	0.112234	0.103626	0.128007	0.136256	0.139543	0.147631	0.164204	0.19178	0.189868	0.202622	0.197163	0.216268	0.206872	0.217994	0.207765	0.219528	0.210177	0.214304	0.201328	0.204796	0.195947	0.199168	0.190017
Neuron_154	0.0165662	0.0222288	0.133665	0.180653	0.209693	0.228781	0.182641	0.191827	0.177106	0.153737	0.116655	0.0573246	0.0504943	0.0117839	0.0222067	0.028735	0.0211878	0.0303802	0.0504434	0.106858	0.121113	0.126786	0.104713	0.11098	0.10402	0.103198	0.101028	0.100526	0.102405	0.0899524	0.0802555	0.0611324	0.063597	0.0495919	0.0493712	0.0404634	0.0497766	0.0453872	0.0502808	0.0414016	0.0458909	0.0397525	0.0448327	0.0375812	0.0444049	0.0433275	0.0491288	0.0468024	0.0479407
Neuron_155	0.0283194	0.0785726	0.122353	0.264462	0.292065	0.331188	0.27599	0.233969	0.240517	0.284992	0.363001	0.365059	0.385041	0.373104	0.358099	0.316837	0.30821	0.297163	0.295229	0.29632	0.254987	0.227737	0.185257	0.188826	0.157571	0.164782	0.155263	0.18551	0.17883	0.198839	0.188133	0.225263	0.225478	0.25079	0.237456	0.252956	0.249483	0.257824	0.253972	0.254245	0.257484	0.250242	0.248963	0.238566	0.244819	0.24036	0.247712	0.241159	0.246852
Neuron_156	0.0375375	0.0090874	0.023712	0.0513358	0.0240607	0.0432323	0.0888954	0.114863	0.165443	0.210141	0.281123	0.313855	0.274606	0.263418	0.263532	0.289915	0.269023	0.290621	0.282956	0.262638	0.270634	0.269844	0.277991	0.286516	0.302766	0.295189	0.277204	0.282679	0.270606	0.271056	0.256086	0.246037	0.232074	0.221469	0.215759	0.199402	0.202226	0.198415	0.201094	0.198534	0.200681	0.206489	0.210825	0.219828	0.2231	0.228896	0.234812	0.23616	0.240279
Neuron_157	0.0128335	0.00993493	0.0389698	0.0954989	0.201042	0.201022	0.182209	0.167116	0.212969	0.210336	0.24708	0.293851	0.320229	0.303225	0.274662	0.249914	0.248144	0.276048	0.288621	0.311824	0.27863	0.279462	0.25366	0.252572	0.241552	0.252597	0.269318	0.283535	0.275122	0.281922	0.275788	0.298635	0.300291	0.30483	0.301789	0.303831	0.305185	0.298436	0.298645	0.294163	0.295009	0.287231	0.283867	0.277332	0.282513	0.282384	0.286686	0.282616	0.286015
Neuron_158	0.096879	0.0504831	0.118281	0.078124	0.105245	0.0792987	0.112626	0.0787703	0.0571608	0.0377353	0.0733525	0.0810138	0.0935723	0.0854773	0.0890483	0.0823658	0.0851356	0.0946971	0.0759387	0.0565892	0.0320429	0.0397039	0.0211705	0.00759378	0.00165808	0.0260763	0.0327974	0.0363998	0.0277849	0.0368271	0.053524	0.0628636	0.0676374	0.0765176	0.0913247	0.0923317	0.087739	0.083889	0.0873924	0.0878514	0.0896894	0.0838981	0.0851962	0.0817709	0.0831544	0.0779292	0.0794084	0.0776125	0.0794527
Neuron_159	0.0700377	0.130924	0.231839	0.326594	0.302093	0.348003	0.409845	0.426784	0.440044	0.467223	0.471329	0.487989	0.468826	0.458025	0.472276	0.466851	0.476337	0.44078	0.453868	0.444485	0.433838	0.420653	0.402254	0.418752	0.397167	0.402537	0.373944	0.381729	0.368469	0.369842	0.368018	0.369549	0.375022	0.380546	0.384957	0.394633	0.394874	0.409724	0.409646	0.422986	0.424125	0.429415	0.434773	0.435082	0.44178	0.434412	0.441254	0.435117	0.438815
Neuron_160	0.0687105	0.103834	0.149894	0.163261	0.0915815	0.0177421	0.0476425	0.0283318	0.0202451	0.0254432	0.0655847	0.0595773	0.032315	0.00125772	0.0424537	0.0510469	0.0100342	0.000954305	0.0143013	0.0522344	0.0866207	0.0851081	0.0705546	0.0808754	0.0843792	0.0948509	0.0928111	0.083643	0.0887226	0.104474	0.0998329	0.0922498	0.073412	0.0785651	0.0678842	0.0730987	0.0671119	0.0736168	0.0761406	0.0750336	0.0626766	0.056709	0.0541733	0.0555488	0.052023	0.0497729	0.0475277	0.0465152	0.046585
Neuron_161	0.0791923	0.177897	0.205085	0.232059	0.26686	0.273764	0.286563	0.342917	0.375659	0.370548	0.370073	0.393061	0.379418	0.356607	0.359916	0.394849	0.412827	0.422788	0.394304	0.393644	0.395132	0.390499	0.394039	0.396239	0.417878	0.409824	0.407169	0.396777	0.399388	0.385448	0.37745	0.370794	0.378301	0.375564	0.376167	0.368602	0.371516	0.369208	0.370509	0.36922	0.376542	0.382192	0.384324	0.38732	0.387884	0.392461	0.390293	0.392843	0.389511
Neuron_162	0.0538815	0.121947	0.141485	0.13186	0.180172	0.176909	0.251034	0.216537	0.162592	0.151869	0.119944	0.185593	0.179198	0.181539	0.182195	0.162587	0.198318	0.209194	0.266517	0.282608	0.328042	0.337603	0.366901	0.365583	0.373674	0.385848	0.380439	0.399182	0.401318	0.408814	0.40077	0.388887	0.389823	0.381892	0.386386	0.382258	0.376072	0.3829	0.370112	0.376132	0.361463	0.368557	0.36098	0.361784	0.356908	0.353513	0.353529	0.350107	0.349849
Neuron_163	0.0728411	0.193615	0.248122	0.295978	0.261465	0.226843	0.112509	0.0690823	0.01633	0.020275	0.0495626	0.0169171	0.0684941	0.130314	0.129413	0.148865	0.171393	0.153952	0.172222	0.122484	0.114932	0.0939561	0.104309	0.0752828	0.0627195	0.0460982	0.0321215	0.0172056	0.00404845	0.00792018	0.00865878	0.00311969	0.000983294	0.00749911	0.000745925	0.00190726	0.0081028	0.0116011	0.00706562	0.0176396	0.0174729	0.0326102	0.0238653	0.0353153	0.0341872	0.0417469	0.039185	0.0408278	0.0410768
Neuron_164	0.0347888	0.131348	0.0899053	0.0754926	0.116361	0.120968	0.198688	0.178446	0.109325	0.0214623	0.0770459	0.0382947	0.00788119	0.0150114	0.00820302	0.0446855	0.0610152	0.0810471	0.0818329	0.0783153	0.0866853	0.0706529	0.0738258	0.0835604	0.106624	0.132856	0.129381	0.139612	0.141627	0.140849	0.135126	0.127239	0.1336	0.128989	0.121052	0.106374	0.100781	0.099049	0.0929685	0.086193	0.080929	0.0820371	0.0803828	0.0815857	0.083021	0.0852809	0.0912693	0.0908734	0.0937773
Neuron_165	0.0872754	0.0937187	0.0563857	0.0315284	0.0867352	0.0193834	0.000376562	0.0347368	0.0418443	0.0611747	0.076339	0.0479323	0.0186705	0.0113037	0.0263281	0.0312712	0.00916672	0.00316759	0.0116002	0.0121102	0.0072018	0.0266207	0.0161381	0.0292904	0.015316	0.0126562	0.0173355	0.00917995	0.00569934	0.0231348	0.00119512	0.0109677	0.00134438	0.020629	0.0173886	0.0249305	0.0182542	0.0260194	0.0165221	0.0211112	0.00742741	0.0198248	0.0133075	0.0225477	0.0106775	0.0149694	0.0152048	0.0142407	0.0172704
Neuron_166	0.036395	0.0274978	0.125096	0.053674	0.00301033	0.0393017	0.0933335	0.190308	0.201156	0.265734	0.307234	0.295685	0.34486	0.355632	0.417266	0.42167	0.428995	0.423836	0.419331	0.412029	0.402337	0.416716	0.441058	0.424147	0.432812	0.415579	0.428781	0.411438	0.416822	0.415943	0.421827	0.417031	0.400675	0.401758	0.397726	0.404198	0.392754	0.398477	0.395064	0.399396	0.395007	0.397818	0.398135	0.405674	0.402466	0.408314	0.402595	0.412535	0.408308
Neuron_167	0.0473067	0.00166407	0.00736342	0.05768	0.112923	0.132632	0.16861	0.212879	0.203932	0.250254	0.294068	0.246763	0.199869	0.214081	0.191689	0.229226	0.22251	0.2634	0.218296	0.245307	0.228874	0.244398	0.266267	0.297898	0.319228	0.310223	0.313563	0.314121	0.327361	0.336279	0.330275	0.329339	0.328491	0.327305	0.32524	0.315608	0.328132	0.315091	0.324807	0.301869	0.311164	0.300622	0.311159	0.302908	0.303345	0.299965	0.298755	0.295272	0.29468
Neuron_168	0.068103	0.0685106	0.0966712	0.106884	0.179221	0.0893013	0.154002	0.214463	0.164524	0.125916	0.102068	0.10047	0.0709939	0.0585893	0.031125	0.0496768	0.0606953	0.0758176	0.00835067	0.0108085	0.0259024	0.0340512	0.0451541	0.052408	0.0425906	0.05175	0.0571297	0.0706595	0.0779124	0.0657945	0.0468709	0.0446599	0.0264044	0.0240826	0.00447207	0.0124612	0.00192438	0.0115142	9.99311e-05	0.00170302	0.00163655	0.00764662	0.00547655	0.00937241	0.0108111	0.0160772	0.0188011	0.0209631	0.0195937
Neuron_169	0.0236016	0.123505	0.291381	0.31403	0.32666	0.265273	0.251818	0.232698	0.221588	0.232106	0.208058	0.157856	0.176742	0.180236	0.157638	0.14162	0.113089	0.103145	0.0900547	0.0346956	0.0588545	0.045669	0.0766375	0.0648684	0.0552514	0.0729704	0.076087	0.0910183	0.0907584	0.118911	0.143524	0.155324	0.174922	0.181514	0.194988	0.198934	0.199762	0.198904	0.196473	0.201952	0.191771	0.195307	0.181822	0.181777	0.169971	0.168138	0.162423	0.157531	0.159745
Neuron_170	0.0027705	0.0988048	0.186053	0.243929	0.350663	0.422496	0.500606	0.477919	0.442258	0.461365	0.480037	0.510012	0.51233	0.516306	0.533253	0.533107	0.540914	0.547973	0.540039	0.569397	0.573821	0.611398	0.604976	0.612771	0.599551	0.592567	0.577253	0.565478	0.553936	0.551822	0.545802	0.535408	0.530098	0.523861	0.528183	0.519041	0.526938	0.525827	0.541884	0.540089	0.552688	0.54857	0.562237	0.556224	0.564046	0.558892	0.565061	0.56282	0.565128
Neuron_171	0.060224	0.162268	0.291776	0.309857	0.264649	0.235756	0.253301	0.274296	0.281381	0.225653	0.223404	0.181634	0.208201	0.151606	0.154041	0.180569	0.229733	0.239533	0.228815	0.26116	0.304947	0.351511	0.398013	0.416189	0.433641	0.440525	0.431204	0.42685	0.426493	0.429805	0.412842	0.396042	0.368192	0.354915	0.340111	0.338777	0.324139	0.325871	0.316917	0.317673	0.314363	0.320011	0.321557	0.329644	0.330695	0.331911	0.328274	0.331324	0.333326
Neuron_172	0.00200068	0.0528456	0.0505259	0.00358993	0.0161428	0.00946956	0.047667	0.022694	0.0215612	0.0581909	0.0882616	0.0847629	0.0906175	0.0878894	0.116708	0.143543	0.183697	0.183063	0.209857	0.204116	0.219211	0.185923	0.170208	0.139401	0.134646	0.120798	0.119466	0.113989	0.105216	0.0918358	0.0598087	0.0507394	0.0416822	0.0535282	0.0396388	0.0446602	0.0319116	0.0389378	0.0251897	0.0328628	0.027288	0.0413711	0.0365749	0.0451979	0.0427276	0.0547465	0.0566065	0.0645588	0.066573
Neuron_173	0.0322574	0.119276	0.154424	0.133366	0.210919	0.227483	0.308688	0.349562	0.303799	0.281666	0.272458	0.250909	0.211111	0.247003	0.230886	0.277417	0.303756	0.2903	0.270368	0.243021	0.261816	0.259545	0.287547	0.283397	0.290528	0.291549	0.278679	0.259881	0.267549	0.269953	0.273899	0.253726	0.2558	0.25159	0.266959	0.260251	0.259394	0.259979	0.264903	0.264452	0.259575	0.267309	0.270541	0.276847	0.272951	0.269744	0.267916	0.269457	0.269941
Neuron_174	0.00339085	0.0147692	0.0556676	0.0843196	0.157819	0.235366	0.254038	0.29084	0.256832	0.270777	0.243434	0.237658	0.204163	0.173664	0.154631	0.130856	0.137996	0.133478	0.151208	0.155589	0.175155	0.194063	0.184453	0.209302	0.206224	0.233734	0.219896	0.228775	0.217176	0.21599	0.206417	0.194669	0.193913	0.194531	0.192492	0.19074	0.187238	0.196846	0.19508	0.20317	0.202298	0.207406	0.210704	0.209991	0.215736	0.209659	0.217189	0.20905	0.211895
Neuron_175	0.000389402	0.0382092	0.0171373	0.0072801	0.0948016	0.167754	0.137094	0.0416972	0.00879297	0.0668616	0.0283208	0.0758681	0.0467261	0.0823175	0.0256255	0.0460815	0.0167139	0.0448063	0.0432178	0.0246949	0.00837432	0.00170386	0.0246139	0.0286811	0.0576225	0.0508823	0.0527911	0.0542567	0.0482842	0.0285052	0.0387153	0.0364844	0.0629274	0.0365474	0.0479733	0.0183855	0.0388907	0.0253251	0.0335971	0.0266151	0.0371705	0.036547	0.0360905	0.0338255	0.0385387	0.042754	0.0454955	0.0419384	0.0396825
Neuron_176	0.0870778	0.0896485	0.0781013	0.0809954	0.102545	0.103157	0.0209599	0.0201462	0.0617766	0.20031	0.223977	0.267132	0.215771	0.188203	0.122608	0.127266	0.135223	0.169104	0.17164	0.154027	0.111709	0.107467	0.101145	0.136992	0.128933	0.159997	0.165975	0.18782	0.184262	0.189075	0.202667	0.206512	0.216026	0.199394	0.201535	0.198375	0.204911	0.19677	0.196011	0.18814	0.188887	0.177364	0.182294	0.173859	0.188077	0.18094	0.189887	0.178524	0.184968
Neuron_177	0.041475	0.0773972	0.0974752	0.0282175	0.028506	0.0714278	0.0343766	0.0510072	0.166756	0.178397	0.236231	0.184868	0.224737	0.168215	0.179582	0.177187	0.249235	0.259928	0.292418	0.247314	0.255994	0.244869	0.27922	0.290371	0.336781	0.348357	0.355039	0.344165	0.339725	0.349221	0.340977	0.355548	0.329952	0.337773	0.312623	0.320689	0.302892	0.312712	0.297449	0.302051	0.285888	0.295261	0.284287	0.30005	0.292738	0.305609	0.296191	0.30172	0.296212
Neuron_178	0.0422223	0.0534828	0.0815734	0.131831	0.108565	0.149807	0.126697	0.0986811	0.126548	0.171802	0.150992	0.100162	0.0603269	0.103704	0.0729763	0.0671746	0.102151	0.116926	0.119356	0.103675	0.0733558	0.0545346	0.0692916	0.0994099	0.102484	0.107741	0.0997371	0.0927062	0.0855967	0.096733	0.0907046	0.109948	0.113614	0.116902	0.10493	0.105614	0.109009	0.10922	0.104901	0.0983719	0.0968931	0.0970956	0.0934395	0.0887879	0.0903994	0.0909505	0.0913507	0.0852507	0.0868935
Neuron_179	0.0357565	0.157926	0.160669	0.210582	0.276387	0.280089	0.260439	0.156391	0.167324	0.143418	0.16844	0.157799	0.198645	0.218518	0.206206	0.224324	0.199554	0.194326	0.188335	0.223892	0.247953	0.248471	0.25435	0.230033	0.226647	0.198341	0.200262	0.192237	0.207073	0.209961	0.196268	0.204007	0.197885	0.204857	0.194329	0.198855	0.201845	0.203477	0.210117	0.210497	0.213832	0.216377	0.21157	0.215234	0.208991	0.21641	0.210741	0.217209	0.215896
Neuron_180	0.0270491	0.045694	0.151926	0.228408	0.298919	0.340249	0.29726	0.20605	0.185312	0.0798618	0.0382028	0.0384317	0.00411504	0.0454497	0.029361	0.0445651	0.0128092	0.00338304	0.00708131	0.012393	0.00389784	0.0140511	0.0280304	0.0198679	0.00571254	0.0163909	0.0109352	0.000672403	0.0185366	0.0342622	0.0461035	0.062724	0.0749734	0.0811101	0.096464	0.100916	0.117683	0.109464	0.113105	0.106662	0.10735	0.105641	0.099152	0.0931993	0.0838873	0.0790021	0.0737394	0.0704822	0.0711137
Neuron_181	0.0646642	0.0474081	0.036736	0.0799193	0.167346	0.247664	0.207974	0.225568	0.200043	0.224398	0.233222	0.275287	0.328648	0.328297	0.309456	0.296763	0.286714	0.333428	0.348861	0.374273	0.375233	0.394515	0.382983	0.381928	0.370659	0.369012	0.360283	0.352589	0.340748	0.322312	0.32298	0.316828	0.316601	0.312161	0.313363	0.315221	0.323258	0.32716	0.3371	0.339163	0.350363	0.345021	0.35083	0.345829	0.351956	0.348631	0.35054	0.34645	0.344937
Neuron_182	0.0591577	0.035541	0.028904	0.0512326	0.164255	0.199925	0.203863	0.131186	0.145252	0.171605	0.157893	0.107976	0.126104	0.134819	0.131655	0.119293	0.100156	0.110176	0.127022	0.165588	0.163846	0.165084	0.156319	0.149952	0.141766	0.122143	0.127416	0.131046	0.131146	0.128138	0.106346	0.119187	0.117539	0.131368	0.130198	0.138328	0.154003	0.155062	0.163318	0.156608	0.166099	0.167236	0.167678	0.161545	0.158532	0.160783	0.159245	0.156662	0.15418
Neuron_183	0.00270249	0.0301531	0.138966	0.0778069	0.120787	0.218652	0.23334	0.255424	0.263527	0.318279	0.331884	0.283877	0.306068	0.314311	0.378172	0.356803	0.374755	0.356334	0.350716	0.338433	0.302642	0.282107	0.27698	0.273193	0.260857	0.226842	0.210307	0.169117	0.175845	0.151829	0.148593	0.140874	0.145272	0.14984	0.138028	0.152843	0.153075	0.17693	0.179098	0.187657	0.193019	0.206265	0.217022	0.220491	0.222593	0.231583	0.22935	0.235623	0.225344
Neuron_184	0.0568955	0.04677	0.108911	0.188515	0.220059	0.106131	0.0535275	0.0170523	0.0373206	0.0227713	0.0881906	0.0794437	0.128707	0.111494	0.11697	0.102785	0.147577	0.162314	0.185689	0.198069	0.237167	0.212217	0.208645	0.161238	0.154802	0.1497	0.160998	0.155928	0.15267	0.156595	0.151563	0.147373	0.138479	0.139869	0.142452	0.157393	0.154068	0.162462	0.159891	0.171	0.161176	0.167735	0.158417	0.170428	0.163889	0.172547	0.164721	0.171845	0.168927
Neuron_185	0.0500053	0.0953351	0.146868	0.22404	0.214107	0.126437	0.00582491	0.0317952	0.0197944	0.000794478	0.0110477	0.0499598	0.0750395	0.0897212	0.107535	0.0603149	0.0488697	0.0336055	0.0391651	0.0423544	0.0559338	0.0485357	0.0281131	0.00950285	0.0020113	0.00878636	0.0271198	0.0299787	0.00502986	0.0102438	0.0365912	0.0358941	0.0422747	0.026499	0.0354471	0.0305652	0.0437606	0.041466	0.0420475	0.0270883	0.0187999	0.00832268	0.00687698	0.00293736	0.00255778	0.00471007	0.00929907	0.0124369	0.0126362
Neuron_186	0.0450507	0.104449	0.0796672	0.0338616	0.0147585	0.0129927	0.0115668	0.0298312	0.012385	0.016775	0.00649479	0.0793215	0.0529924	0.092745	0.0515448	0.0709944	0.0487186	0.0582102	0.0375542	0.0392417	0.011456	0.0392262	0.0187776	0.0371612	0.017619	0.0364558	0.0217814	0.0302767	0.0232485	0.0196269	0.0252906	0.0218363	0.031472	0.0148181	0.0256582	0.00736973	0.0184924	0.00244728	0.0167315	0.00877883	0.0279418	0.0154739	0.0286157	0.0164672	0.0344193	0.022951	0.0368498	0.0273157	0.0382144
Neuron_187	0.082548	0.0554263	0.0738125	0.122992	0.17163	0.162022	0.168818	0.217711	0.133587	0.0611694	0.0638817	0.0909705	0.126058	0.108846	0.0526381	0.0405421	0.0359758	0.0522115	0.039447	0.0654122	0.0659581	0.0843563	0.0835849	0.0908247	0.0852131	0.0898948	0.0998418	0.0966001	0.105061	0.103114	0.127326	0.13271	0.141494	0.13603	0.14467	0.149602	0.15732	0.151959	0.161179	0.159009	0.166433	0.153684	0.154342	0.148072	0.151099	0.145798	0.140793	0.138149	0.135221
Neuron_188	0.0456436	0.0449772	0.0865381	0.0827807	0.134037	0.0508832	0.00960472	0.0847039	0.0748742	0.0940963	0.096916	0.0459786	0.0396996	0.0351779	0.0957548	0.131483	0.123314	0.105328	0.0527972	0.08474	0.0587397	0.0925207	0.0763847	0.0950167	0.0915006	0.0837999	0.0727078	0.0761772	0.0928264	0.106042	0.0928948	0.0966578	0.0882175	0.113191	0.107918	0.11573	0.111193	0.113885	0.11611	0.100878	0.108812	0.100583	0.115038	0.103904	0.102771	0.0936308	0.095133	0.0959636	0.096134
Neuron_189	0.00356407	0.010583	0.0587669	0.0660051	0.159137	0.211193	0.259627	0.231148	0.290953	0.258853	0.223409	0.217709	0.215644	0.207728	0.175652	0.170442	0.152198	0.156434	0.15936	0.167384	0.142339	0.153805	0.148522	0.173675	0.187299	0.213527	0.220653	0.242239	0.254155	0.259337	0.26796	0.279972	0.302149	0.301657	0.311903	0.29772	0.305914	0.292353	0.292197	0.278742	0.279908	0.269781	0.267322	0.255411	0.256067	0.248502	0.252283	0.244369	0.245579
Neuron_190	0.0348567	0.0405295	0.0289758	0.0669321	0.0984605	0.112416	0.142074	0.172435	0.23671	0.276271	0.250564	0.242282	0.20297	0.230654	0.178768	0.21367	0.1814	0.217583	0.172996	0.188166	0.162466	0.19119	0.192052	0.196523	0.198377	0.217994	0.214152	0.226012	0.206321	0.230136	0.218112	0.231155	0.221734	0.216043	0.22307	0.210006	0.226729	0.210898	0.226928	0.214223	0.224286	0.214926	0.224001	0.219571	0.229478	0.220881	0.22877	0.217228	0.2282
Neuron_191	0.0366225	0.0125185	0.0842801	0.128698	0.148138	0.156876	0.199193	0.18425	0.164789	0.176837	0.144889	0.112223	0.134758	0.122855	0.130105	0.125031	0.16728	0.197019	0.197691	0.187778	0.170037	0.189979	0.208696	0.212439	0.223426	0.235114	0.232769	0.206365	0.192443	0.191676	0.20774	0.217702	0.215233	0.216763	0.219277	0.227505	0.223524	0.230446	0.233809	0.23805	0.234659	0.229213	0.224945	0.224743	0.222557	0.218507	0.209579	0.20819	0.204254
Neuron_192	0.0472852	0.0838153	0.0427926	0.131461	0.124348	0.0924151	0.0889732	0.0496354	0.0241594	0.00403559	0.0144433	0.0337847	0.0483608	0.0373693	0.0224043	0.0137067	0.00340095	0.0503379	0.0306547	0.0232495	0.00423179	0.0153771	0.0130484	0.017656	0.0249901	0.0384877	0.0394423	0.0403266	0.0376139	0.0620312	0.0676296	0.0809755	0.0713261	0.0746459	0.0782448	0.074795	0.0749726	0.0617246	0.0662283	0.0550828	0.0523259	0.0394817	0.0376326	0.0350863	0.0380836	0.0338934	0.0324508	0.0280326	0.0349853
Neuron_193	0.0754238	0.071444	0.152206	0.250474	0.289879	0.292734	0.307032	0.298524	0.308983	0.330179	0.295695	0.273954	0.297958	0.275931	0.274156	0.253856	0.312953	0.302593	0.327836	0.29965	0.300403	0.273969	0.294078	0.28093	0.288888	0.265564	0.257347	0.244514	0.246047	0.238026	0.242621	0.248294	0.249577	0.244013	0.234727	0.246891	0.242096	0.25568	0.238927	0.251675	0.241037	0.251369	0.239639	0.249177	0.246148	0.254852	0.246953	0.252482	0.24808
Neuron_194	0.0735578	0.0893767	0.098616	0.12278	0.0758448	0.0216131	0.0412928	0.0111314	0.0172834	0.0156144	0.0286168	0.0302262	0.0466036	0.052137	0.0542519	0.0233465	0.0120395	0.0232393	0.024113	0.0159098	0.0240314	0.0584986	0.0866123	0.0809841	0.117443	0.113197	0.125965	0.101546	0.0887668	0.0959155	0.0969	0.10562	0.078754	0.0783828	0.0716558	0.0636534	0.0545301	0.0468819	0.0507694	0.0523101	0.049236	0.0474826	0.0425768	0.0512923	0.0455191	0.0491564	0.0421456	0.0474373	0.0469752
Neuron_195	0.0348561	0.114803	0.10519	0.160208	0.0763085	0.11944	0.150438	0.177234	0.217708	0.239581	0.281014	0.230046	0.206505	0.202465	0.228169	0.275068	0.255866	0.252738	0.201196	0.191395	0.140279	0.117557	0.0966206	0.0981397	0.0862548	0.0826044	0.0650091	0.0713972	0.0677621	0.0810296	0.0660192	0.0847862	0.0815726	0.104369	0.101723	0.110823	0.115481	0.116473	0.126163	0.11574	0.126048	0.124586	0.136848	0.134932	0.138179	0.135562	0.138776	0.135753	0.139799
Neuron_196	0.0575109	0.0397752	0.0797802	0.0366472	0.0337333	0.0922938	0.13258	0.209168	0.339524	0.359863	0.299464	0.228414	0.217823	0.229284	0.219767	0.219569	0.222146	0.210958	0.194163	0.145473	0.139174	0.152945	0.176426	0.187716	0.200981	0.209392	0.222301	0.215948	0.219294	0.218145	0.227423	0.238038	0.237509	0.245557	0.244011	0.250964	0.248842	0.25011	0.246105	0.249698	0.249364	0.255187	0.251511	0.255371	0.251394	0.253331	0.247538	0.246808	0.243636
Neuron_197	0.0913782	0.0758601	0.0107216	0.00243585	0.0240381	0.0670926	0.120906	0.0144229	0.0857151	0.121244	0.0859088	0.103395	0.113738	0.144013	0.162234	0.159502	0.20093	0.216686	0.233811	0.217086	0.211294	0.218374	0.233877	0.252232	0.251753	0.259884	0.264115	0.250173	0.244744	0.227807	0.239846	0.226176	0.222856	0.203113	0.196916	0.196623	0.189805	0.189209	0.180274	0.18844	0.185954	0.187979	0.188933	0.191989	0.198605	0.200333	0.201306	0.202094	0.201852
Neuron_198	0.0358228	0.0621511	0.0299237	0.0377984	0.00805354	0.00265305	0.0244016	0.0275916	0.0199827	0.0333453	0.034819	0.00216862	0.0221851	0.00261413	0.0204296	0.0308642	0.0160192	0.0522299	0.0437381	0.0305811	0.013692	0.0153088	0.0254399	0.0358852	0.0381972	0.0374763	0.0350839	0.0180336	0.00828895	0.00153254	0.0187531	0.0196317	0.0315019	0.0201308	0.0224604	0.0143456	0.0222281	0.0159037	0.0256663	0.0198457	0.0278132	0.0204923	0.0226871	0.0181125	0.0218044	0.0243718	0.0224732	0.0211344	0.0190353
Neuron_199	0.0516991	0.0609073	0.136745	0.165903	0.0998585	0.0515257	0.0562227	0.0344617	0.0196761	0.0156756	0.0120937	0.0192889	0.035152	0.0508494	0.104202	0.104924	0.143199	0.141593	0.171275	0.17471	0.205807	0.217335	0.238409	0.241553	0.228367	0.230151	0.215632	0.216671	0.207571	0.204247	0.191691	0.188987	0.170198	0.166743	0.147688	0.158033	0.14318	0.153105	0.139324	0.146222	0.139556	0.148083	0.145092	0.15151	0.151931	0.156043	0.155809	0.158414	0.161
Neuron_200	0.0496389	0.0782937	0.124904	0.147094	0.152384	0.0695088	0.115184	0.148916	0.202649	0.222981	0.176801	0.146008	0.133071	0.147217	0.178479	0.203214	0.176929	0.181237	0.176861	0.190898	0.199925	0.220561	0.250196	0.254928	0.256664	0.250872	0.249357	0.266815	0.266775	0.275235	0.270165	0.273083	0.264707	0.255742	0.252811	0.250293	0.256153	0.251839	0.253748	0.248596	0.254713	0.25554	0.259619	0.260026	0.26184	0.261824	0.26366	0.261148	0.264226
Neuron_201	0.0968209	0.117972	0.105029	0.0395336	0.0282025	0.0338156	0.026847	0.00967013	0.00208112	0.0293195	0.0654496	0.120863	0.150616	0.208483	0.201082	0.197694	0.177641	0.203563	0.224715	0.224043	0.19913	0.206199	0.207185	0.222955	0.224526	0.23935	0.248816	0.248291	0.246871	0.237074	0.250142	0.260677	0.264776	0.251963	0.243512	0.232391	0.231546	0.220922	0.222527	0.218278	0.223413	0.215745	0.213975	0.210186	0.218467	0.221195	0.225897	0.223279	0.22615
Neuron_202	0.00617884	0.0909149	0.0255874	0.0492939	0.0437407	0.0605186	0.0580237	0.0109291	0.0519037	0.0742144	0.0404635	0.0326003	0.0467476	0.00624734	0.00158036	0.0436302	0.0494959	0.0824452	0.0704282	0.0993412	0.12835	0.152933	0.134139	0.137631	0.136952	0.169207	0.153202	0.167262	0.149471	0.177569	0.160505	0.16173	0.149389	0.16182	0.163801	0.152895	0.145623	0.138373	0.142215	0.133894	0.129062	0.122205	0.125552	0.118147	0.116866	0.10588	0.115245	0.108633	0.120743
Neuron_203	0.0393509	0.00651658	0.00822864	0.0252395	0.0676818	0.0819428	0.0191411	0.0299965	0.0402959	0.0161585	0.00796771	0.0360294	0.00926772	0.0449245	0.0306931	0.0574294	0.0370761	0.014051	0.0283891	0.00984812	0.00247231	0.0489692	0.0305886	0.0450591	0.0151867	0.000214815	0.00258042	0.0055331	0.0244607	0.0232578	0.0283428	0.0111143	0.00782003	0.00333589	0.00973246	0.00458667	0.0233937	0.00945964	0.0245758	0.010934	0.0280814	0.0154728	0.034905	0.0241602	0.034968	0.0229527	0.0299695	0.0267478	0.0316912
Neuron_204	0.070973	0.0179258	0.0588323	0.0159497	0.00541104	0.136516	0.130611	0.122757	0.0715055	0.0448899	0.00528932	0.00849893	0.0201493	0.0116349	0.0671677	0.0971086	0.106349	0.115789	0.104011	0.101498	0.09044	0.0631827	0.0460309	0.0236391	0.0207998	0.0175291	0.0416104	0.0470492	0.0538342	0.0502731	0.0670289	0.0578355	0.0638364	0.0563211	0.0591312	0.0518441	0.0414932	0.0339105	0.0324915	0.0336324	0.0317355	0.0280847	0.0269427	0.0230173	0.0243142	0.0191781	0.0195956	0.0171902	0.0163778
Neuron_205	0.0210932	0.0983195	0.084571	0.0411212	0.0494955	0.0162592	0.00974723	0.0107894	0.0328812	0.0360816	0.00348778	0.000898835	0.036332	0.049518	0.0686396	0.0608602	0.0702517	0.0864021	0.0473478	0.0554701	0.0374541	0.063912	0.0427917	0.0438884	0.00502969	0.00995012	0.0247629	0.0121668	0.0284714	0.0139107	0.0293716	0.0247953	0.0376682	0.0371491	0.040297	0.0336759	0.0299484	0.032795	0.0328723	0.0326874	0.0265268	0.0281878	0.0199629	0.0225877	0.0152306	0.0185033	0.0102281	0.0131861	0.00279102
Neuron_206	0.0680418	0.0820115	0.0803714	0.15511	0.117677	0.0770089	0.0160149	0.0192384	0.0087725	0.0799093	0.214175	0.220273	0.260221	0.220259	0.227769	0.239959	0.26246	0.279929	0.29909	0.2981	0.254762	0.219989	0.211363	0.224122	0.218197	0.223234	0.230939	0.242769	0.242187	0.230974	0.233082	0.251319	0.247076	0.249426	0.224541	0.23914	0.225205	0.230717	0.218723	0.217615	0.214987	0.210803	0.207174	0.205836	0.210435	0.216926	0.217108	0.219337	0.219137
Neuron_207	0.0157259	0.0270205	0.0569686	0.129899	0.0828253	0.145456	0.163897	0.117665	0.116965	0.102255	0.140252	0.140392	0.165398	0.150951	0.119184	0.0998661	0.102833	0.131035	0.145693	0.135469	0.146283	0.129417	0.128327	0.111273	0.131427	0.118827	0.128312	0.100257	0.09643	0.0764704	0.0675324	0.0593367	0.0503788	0.048784	0.0336525	0.0282276	0.0248922	0.0261048	0.0306524	0.0335987	0.0401729	0.0476936	0.0481781	0.058059	0.0571597	0.0733448	0.0703489	0.0801939	0.0736899
Neuron_208	0.0413692	0.00809083	0.123577	0.202061	0.241171	0.192442	0.0988194	0.128508	0.116536	0.104005	0.174013	0.210825	0.214684	0.232103	0.226444	0.226403	0.267972	0.307843	0.323895	0.306283	0.31714	0.306193	0.314815	0.322823	0.304457	0.2956	0.294186	0.293854	0.288378	0.288722	0.297909	0.302597	0.297036	0.29063	0.283488	0.29401	0.291092	0.291126	0.283452	0.288176	0.284098	0.28156	0.277795	0.280246	0.283908	0.284137	0.282817	0.281323	0.284977
Neuron_209	0.0819208	0.144926	0.125103	0.170242	0.12757	0.111634	0.0962762	0.135157	0.143402	0.0412009	0.0789841	0.0402178	0.0112951	0.0199256	0.0330792	0.0184372	0.0277772	0.00693775	0.0312548	0.0127792	0.0114222	0.0132845	0.0251057	0.0122098	0.0276727	0.0396706	0.0667842	0.0754721	0.0715036	0.0630304	0.0904513	0.0949891	0.101379	0.0840651	0.0783643	0.0777697	0.0636816	0.068494	0.0519035	0.0641106	0.0540728	0.0570049	0.0427813	0.0486964	0.0474023	0.0545159	0.0495243	0.0537552	0.0494882
Neuron_210	0.0540877	0.180506	0.172694	0.138199	0.173201	0.265351	0.318518	0.337274	0.360314	0.396464	0.365754	0.367503	0.410564	0.445129	0.44433	0.431847	0.42139	0.428921	0.4342	0.455174	0.440739	0.464938	0.45047	0.450193	0.432834	0.435366	0.434402	0.427634	0.431464	0.421242	0.418116	0.405162	0.403028	0.402505	0.406376	0.407401	0.407596	0.404273	0.409994	0.404723	0.414479	0.410248	0.421037	0.414149	0.420928	0.417718	0.422517	0.422833	0.423847
Neuron_211	0.0739536	0.134154	0.0878218	0.0259106	0.000713903	0.0347764	0.0204954	0.0487884	0.0908362	0.0942166	0.0530813	0.00435829	0.0338956	0.0455782	0.0652491	0.0712348	0.110414	0.117845	0.118995	0.123023	0.152514	0.156858	0.17462	0.17845	0.175596	0.171128	0.178087	0.175098	0.170231	0.150686	0.131621	0.113105	0.116462	0.104328	0.0997301	0.0969269	0.0975109	0.0911048	0.0845061	0.0874658	0.0924313	0.103633	0.102668	0.105752	0.105741	0.112059	0.110647	0.114173	0.114812
Neuron_212	0.0664893	0.0640953	0.185845	0.126391	0.123157	0.170718	0.171849	0.101213	0.0352115	0.0974974	0.120378	0.146035	0.130752	0.13017	0.134963	0.111703	0.0889439	0.0923795	0.0876663	0.0899645	0.0691489	0.0330453	0.028563	0.0100584	0.0168182	0.0108226	0.0208284	0.0285656	0.0124795	0.0125207	0.00653009	0.02573	0.0364995	0.0442131	0.0432523	0.0419665	0.0415306	0.045444	0.051441	0.057541	0.0578407	0.0592096	0.0562217	0.0573349	0.0556428	0.0599398	0.0599999	0.0600335	0.058059
Neuron_213	0.0383133	0.0497293	0.0938176	0.12527	0.172058	0.125366	0.118397	0.0941686	0.0785641	0.0594365	0.06932	0.0630594	0.0769666	0.0860363	0.0830113	0.0346403	0.0220662	0.0207733	0.00785063	0.0183172	0.0101128	0.00375337	0.0311756	0.0198801	0.0349273	0.0245455	0.0416726	0.034549	0.0452143	0.061761	0.081788	0.0907233	0.0798457	0.068703	0.0666076	0.0674553	0.0650736	0.0630257	0.0617591	0.0621186	0.0554615	0.0556911	0.0479305	0.0566031	0.0511011	0.0587554	0.0498009	0.0561991	0.0522759
Neuron_214	0.0264842	0.0710297	0.184013	0.135287	0.095392	0.023484	0.0200337	0.0796019	0.121296	0.0932203	0.0164768	0.040813	0.0208906	0.0505679	0.106281	0.129457	0.150677	0.141194	0.13982	0.124468	0.121509	0.136601	0.164087	0.196956	0.192937	0.176448	0.158286	0.15356	0.154195	0.138826	0.128241	0.127139	0.12675	0.119941	0.106594	0.104804	0.106496	0.106343	0.0967847	0.0935474	0.100483	0.108723	0.110299	0.109109	0.111518	0.113464	0.114073	0.113849	0.114728
Neuron_215	0.0710157	0.158823	0.171291	0.19216	0.185193	0.13704	0.129408	0.113568	0.101	0.00453523	0.0371588	0.0112558	0.029659	0.0217321	0.0295755	0.0553159	0.0704967	0.0648421	0.0607334	0.0855399	0.103737	0.132903	0.146655	0.134894	0.146695	0.130341	0.163019	0.172884	0.215829	0.230776	0.242497	0.248576	0.238483	0.247322	0.248778	0.255438	0.247596	0.235323	0.221308	0.205763	0.194523	0.184484	0.174857	0.172359	0.160095	0.159709	0.14938	0.159225	0.15632
Neuron_216	0.0275029	0.0144801	0.0491092	0.0923244	0.0556656	0.0573239	0.0312083	0.0521154	0.0339999	0.023144	0.0262001	0.0500364	0.0697546	0.0672243	0.0734405	0.077857	0.134499	0.150633	0.14142	0.10482	0.132027	0.12993	0.136355	0.121849	0.138577	0.124808	0.12364	0.10293	0.117677	0.113118	0.132232	0.104224	0.096395	0.0841364	0.0861375	0.0864963	0.0812079	0.0843497	0.0739069	0.0778506	0.068784	0.0740436	0.0714184	0.0861233	0.0841007	0.0919629	0.0847235	0.0953176	0.0917584
Neuron_217	0.0180636	0.073573	0.167698	0.0992738	0.0836823	0.0371802	0.0182852	0.0192469	0.0307811	0.0422144	0.0399544	0.089193	0.0787529	0.0356247	0.0189857	0.0500225	0.0584435	0.0578087	0.0772299	0.107369	0.149685	0.178678	0.20836	0.215974	0.216484	0.208954	0.215398	0.228721	0.235818	0.233601	0.219299	0.209462	0.202586	0.20156	0.19132	0.184047	0.17885	0.173143	0.160683	0.15384	0.14813	0.155512	0.152128	0.150454	0.141343	0.142829	0.14316	0.145615	0.147286
Neuron_218	0.0763765	0.00791863	0.0489606	0.0921278	0.0573834	0.140914	0.0796661	0.112711	0.0482621	0.0312345	0.0286296	0.0463564	0.0921036	0.0986905	0.135947	0.114127	0.133145	0.141465	0.14887	0.156828	0.1497	0.145753	0.12677	0.123029	0.0873969	0.0693826	0.0635741	0.0440234	0.0290615	0.00516258	9.59951e-05	0.0107083	0.0175628	0.0153066	0.022128	0.0027095	0.00524868	0.00588776	0.00566707	0.016535	0.0258666	0.0294312	0.0374683	0.038243	0.0460956	0.0477071	0.0468965	0.0486684	0.0467726
Neuron_219	0.0538201	0.00420319	0.0179987	0.0112141	0.0280168	0.0235094	0.111849	0.152541	0.0611326	0.0022874	0.058879	0.0308314	0.00731249	0.0221429	0.0763371	0.0788281	0.0892693	0.0826013	0.0540742	0.0447518	0.0544676	0.0696825	0.0575779	0.0255346	0.00581176	0.0233371	0.0184053	0.034665	0.0369728	0.0474124	0.0399324	0.0445585	0.0349309	0.0238146	0.00573236	0.00184729	0.0050001	0.00259603	0.00727262	0.0128574	0.0215184	0.0193105	0.0215975	0.0179568	0.0137319	0.0108959	0.00634198	0.0118151	0.00850619
Neuron_220	0.0986403	0.0626775	0.122151	0.183244	0.231954	0.225919	0.186164	0.073595	0.0554723	0.0667589	0.0556011	0.112018	0.108562	0.159674	0.155852	0.176562	0.178651	0.192883	0.225315	0.213094	0.228503	0.222158	0.215792	0.227828	0.216411	0.219876	0.199184	0.195588	0.177164	0.166684	0.177002	0.17436	0.186974	0.17541	0.175963	0.167256	0.172777	0.175587	0.175974	0.185092	0.182947	0.186256	0.180321	0.178988	0.182525	0.180374	0.186495	0.179798	0.185098
Neuron_221	0.00802188	0.0566293	0.0281612	0.0706441	0.12906	0.128075	0.168624	0.209875	0.191256	0.224114	0.223682	0.214634	0.226314	0.215254	0.223066	0.22784	0.197796	0.202638	0.203903	0.196624	0.161543	0.140712	0.155668	0.142635	0.1449	0.143803	0.148011	0.153053	0.15737	0.160449	0.174729	0.18807	0.204752	0.200325	0.208159	0.204669	0.206002	0.201879	0.198506	0.192361	0.188162	0.183617	0.177308	0.175292	0.173016	0.175499	0.174911	0.176791	0.17567
Neuron_222	0.035395	0.0160318	0.00583907	0.085049	0.108098	0.11869	0.0802677	0.0896002	0.0300519	0.0164277	0.0593538	0.0872356	0.0668753	0.0844182	0.0769118	0.118395	0.0887098	0.118419	0.0773275	0.112226	0.115871	0.119116	0.121621	0.120988	0.149698	0.13345	0.143143	0.1364	0.148098	0.159421	0.163861	0.17339	0.181432	0.19223	0.200143	0.185865	0.193317	0.182864	0.201333	0.188061	0.192126	0.180954	0.180309	0.175091	0.165233	0.164115	0.1594	0.162608	0.158564
Neuron_223	0.0959642	0.200206	0.243371	0.218787	0.157879	0.170138	0.237424	0.328686	0.428289	0.452519	0.451931	0.498065	0.453009	0.451283	0.439662	0.489532	0.49969	0.486544	0.481184	0.470836	0.483031	0.481131	0.493839	0.506919	0.526176	0.520915	0.517089	0.529568	0.546525	0.554471	0.553885	0.543201	0.541437	0.532471	0.537101	0.525053	0.528868	0.519872	0.513948	0.503009	0.493973	0.493602	0.492356	0.497189	0.494392	0.4932	0.494178	0.496611	0.499428
Neuron_224	0.0715803	0.0832845	0.13391	0.100456	0.0284504	0.0391012	0.0209926	0.0630804	0.0701676	0.135033	0.184822	0.230673	0.183245	0.166474	0.166269	0.222375	0.260074	0.271876	0.247799	0.225536	0.199638	0.172444	0.161365	0.157425	0.183476	0.170518	0.160022	0.128633	0.129647	0.131654	0.131724	0.118224	0.121973	0.127375	0.138984	0.127988	0.136183	0.138151	0.155519	0.150693	0.154036	0.155534	0.168569	0.172928	0.172687	0.172933	0.172059	0.175158	0.169414
Neuron_225	0.0819712	0.0892679	0.0623615	0.111935	0.164436	0.0784779	0.0602445	0.0676821	0.00437147	0.0423235	0.136406	0.136078	0.105984	0.102752	0.136462	0.148096	0.156549	0.159533	0.1434	0.12674	0.114777	0.0887904	0.100917	0.0996077	0.11758	0.090689	0.0947195	0.068229	0.0691971	0.0637784	0.0687729	0.0648642	0.0631729	0.0655342	0.0621096	0.0573499	0.0594828	0.0630797	0.0710208	0.0709061	0.0679333	0.074055	0.0744993	0.0868181	0.0793965	0.0904726	0.0838242	0.092746	0.0847612
Neuron_226	0.0565892	0.105942	0.155181	0.137367	0.116306	0.113149	0.090436	0.0784081	0.0327231	0.110538	0.119709	0.154746	0.105725	0.145404	0.159214	0.18044	0.164632	0.179601	0.218318	0.225081	0.256145	0.241442	0.280773	0.265101	0.273967	0.237017	0.26099	0.277847	0.279872	0.271474	0.258877	0.246306	0.240701	0.21325	0.216508	0.204386	0.220856	0.204977	0.197827	0.19656	0.188654	0.197479	0.186332	0.199324	0.191156	0.203216	0.198072	0.203257	0.202977
Neuron_227	0.00500322	0.00832846	0.0164978	0.0437639	0.0550944	0.0757964	0.0168668	0.0172567	0.0653606	0.0657609	0.0980544	0.0447108	0.024865	0.0180371	0.0376705	0.0592229	0.0933653	0.122425	0.113001	0.127053	0.108539	0.136108	0.139814	0.157829	0.142603	0.138971	0.133882	0.122281	0.10408	0.0926128	0.0767166	0.0655017	0.0414702	0.0428685	0.0344901	0.0435385	0.0354791	0.0377141	0.0409125	0.0397566	0.0456253	0.0443019	0.058675	0.0612287	0.0688136	0.0666998	0.0684583	0.070665	0.0721969
Neuron_228	0.0875951	0.0705704	0.109554	0.156422	0.0186947	0.0207539	0.0242311	0.093053	0.0510735	0.0017979	0.0548672	0.0990961	0.0763701	0.0632676	0.0560446	0.099579	0.112249	0.117116	0.135683	0.154688	0.171332	0.141383	0.154368	0.126626	0.145551	0.109606	0.121541	0.104818	0.115716	0.0938874	0.0845002	0.0691698	0.0736535	0.0612534	0.0629641	0.0494202	0.0568163	0.0505602	0.0521348	0.0501471	0.0456696	0.0516927	0.0442227	0.0550799	0.0480918	0.0616989	0.0557276	0.0676104	0.0624954
Neuron_229	0.0827567	0.116928	0.109196	0.118625	0.107313	0.107605	0.0696115	0.0976818	0.171413	0.224272	0.23424	0.155806	0.127436	0.185684	0.261233	0.333978	0.371416	0.400185	0.409794	0.385461	0.37329	0.375944	0.392007	0.394569	0.378323	0.357767	0.342721	0.336991	0.315273	0.303566	0.290652	0.290172	0.279066	0.281219	0.274136	0.281141	0.280664	0.283484	0.274848	0.276829	0.276428	0.284313	0.286586	0.292484	0.292062	0.293761	0.293212	0.292669	0.296239
Neuron_230	0.0548284	0.0309862	0.122861	0.0810878	0.0397438	0.108629	0.026444	0.0290378	0.0558103	0.0433422	0.0635983	0.100402	0.0993544	0.108498	0.160973	0.180791	0.215374	0.198049	0.204723	0.182522	0.204683	0.214537	0.238225	0.247528	0.264474	0.25223	0.263287	0.247251	0.258848	0.263119	0.275833	0.263832	0.252646	0.242603	0.23413	0.226152	0.216529	0.211201	0.203129	0.203862	0.192975	0.194204	0.191014	0.199083	0.193801	0.198063	0.193973	0.202359	0.200083
Neuron_231	0.00990993	0.0880193	0.0236835	0.102495	0.145206	0.207475	0.153642	0.140758	0.17063	0.167545	0.143847	0.178047	0.165939	0.164376	0.0944838	0.103741	0.135188	0.19787	0.232072	0.269655	0.263234	0.262579	0.23862	0.238079	0.263237	0.285794	0.294666	0.28832	0.26818	0.264435	0.24825	0.269175	0.265288	0.268012	0.269163	0.259301	0.26768	0.253292	0.263407	0.254445	0.258609	0.244989	0.239932	0.23416	0.238866	0.236599	0.238019	0.232053	0.234313
Neuron_232	0.0967919	0.0944013	0.0890552	0.0838694	0.032163	0.0441273	0.0393902	0.0299851	0.0644281	0.0808595	0.0864848	0.0686252	0.0612912	0.120983	0.143096	0.182555	0.120973	0.141692	0.118667	0.154119	0.109896	0.130948	0.132838	0.164773	0.157489	0.146273	0.140948	0.130541	0.128655	0.119163	0.123251	0.128707	0.132345	0.121482	0.117829	0.107824	0.123159	0.113854	0.134582	0.120986	0.139842	0.128413	0.142659	0.133604	0.142219	0.138574	0.143218	0.139291	0.139851
Neuron_233	0.0296405	0.0271714	0.0415451	0.0932484	0.147985	0.122703	0.197885	0.151288	0.0952454	0.0442446	0.086057	0.147266	0.137474	0.113377	0.0489589	0.0532555	0.032423	0.000651946	0.00416145	0.0346304	0.0756476	0.0725117	0.0631922	0.0569487	0.0621632	0.0784623	0.0711517	0.071294	0.075244	0.0899126	0.0992471	0.091113	0.100215	0.100658	0.114908	0.10949	0.112346	0.116491	0.12731	0.134279	0.128917	0.126749	0.123671	0.122952	0.11965	0.113987	0.114998	0.111917	0.111976
Neuron_234	0.024315	0.0661143	0.0159534	0.0430265	0.027782	0.0210838	0.0662393	0.096491	0.0759264	0.0758443	0.0656295	0.0443911	0.118305	0.114862	0.150828	0.14053	0.129044	0.127811	0.114034	0.120958	0.0945142	0.0827703	0.0594929	0.0417715	0.00987484	0.00319813	0.00267942	5.30452e-05	0.0187211	0.0286263	0.0410544	0.0302153	0.0347523	0.0113455	0.0112084	0.0112971	0.00335881	0.00753934	0.0101052	0.019804	0.0311238	0.0343611	0.0415617	0.041323	0.0418267	0.0417707	0.0408873	0.0431106	0.0428397
Neuron_235	0.0975531	0.0101316	0.110832	0.0960555	0.133092	0.18512	0.169974	0.180991	0.126585	0.140748	0.131486	0.106854	0.076128	0.0771024	0.0543202	0.0910787	0.0654782	0.0594268	0.0346636	0.0510171	0.0409331	0.0504912	0.065814	0.0851723	0.0867194	0.0959825	0.0916127	0.109599	0.117428	0.117399	0.120271	0.122117	0.119739	0.106088	0.102737	0.0964125	0.0953736	0.0837482	0.0812298	0.0694613	0.0736349	0.0649886	0.0682206	0.0655965	0.0709318	0.0673205	0.0702442	0.0691495	0.0747787
Neuron_236	0.0619795	0.152991	0.230023	0.318967	0.400513	0.388901	0.355605	0.258216	0.174811	0.160498	0.139596	0.19145	0.182044	0.16775	0.109147	0.106483	0.114029	0.105175	0.0810395	0.0729855	0.0568666	0.0390837	0.0169555	0.00660312	0.00944619	0.00673075	0.00165802	0.0322647	0.00984728	0.0094304	0.031217	0.0349496	0.0668133	0.0628809	0.0843095	0.0758159	0.0923643	0.0942724	0.106531	0.105073	0.105363	0.0959907	0.0907213	0.0858948	0.0833372	0.0822639	0.0750123	0.075838	0.0654998
Neuron_237	0.069757	0.0667691	0.0429427	0.0548369	0.0603189	0.0864166	0.148603	0.165947	0.150688	0.146438	0.0858703	0.141097	0.183295	0.208805	0.264343	0.287172	0.319598	0.316488	0.3249	0.308665	0.294093	0.304981	0.288231	0.3176	0.297375	0.316518	0.279273	0.278642	0.247572	0.251023	0.257583	0.265656	0.269601	0.265134	0.261087	0.256622	0.247424	0.248613	0.246254	0.249968	0.247837	0.240863	0.246122	0.238993	0.250949	0.239729	0.252446	0.245013	0.256769
Neuron_238	0.052882	0.0166957	0.137249	0.236272	0.278218	0.234613	0.163006	0.0880661	0.0082152	0.0521072	0.0476992	0.076923	0.00215501	0.0148046	0.000761742	0.0192845	0.0413116	0.0443135	0.0657937	0.0494231	0.0603325	0.0555225	0.0615717	0.0670674	0.0679525	0.065511	0.0564744	0.0517911	0.0549458	0.0709714	0.0920381	0.0968485	0.111978	0.104979	0.11664	0.109394	0.123052	0.122738	0.126018	0.121024	0.112746	0.10715	0.100979	0.0985069	0.0952433	0.089279	0.0872685	0.0813638	0.080449
Neuron_239	0.015144	0.0489756	0.0676772	0.119061	0.147361	0.170799	0.249109	0.2449	0.264012	0.220987	0.199793	0.169496	0.176568	0.160749	0.175594	0.174018	0.190762	0.16941	0.147461	0.115361	0.112397	0.105609	0.123482	0.123188	0.14369	0.122199	0.133025	0.112043	0.119236	0.115301	0.124969	0.132697	0.126629	0.135053	0.129989	0.139324	0.132874	0.13745	0.134865	0.142459	0.140657	0.145934	0.142327	0.151797	0.144552	0.150774	0.139066	0.146217	0.139114
Neuron_240	0.0821409	0.160489	0.0337005	0.0454599	0.102689	0.163386	0.159166	0.1981	0.233171	0.254387	0.155555	0.198964	0.132933	0.18177	0.167768	0.185279	0.16693	0.159879	0.159483	0.151948	0.147771	0.123445	0.116631	0.0900049	0.0918941	0.0698903	0.0935212	0.110393	0.129476	0.109612	0.104971	0.101416	0.130502	0.132562	0.154729	0.15166	0.168053	0.157769	0.154629	0.152123	0.158308	0.164996	0.161237	0.158472	0.152457	0.153521	0.151024	0.151934	0.147687
Neuron_241	0.039676	0.0358646	0.0329667	0.0210555	0.108564	0.116636	0.139111	0.103599	0.126787	0.141523	0.182813	0.15497	0.117245	0.0564472	0.0816375	0.0709726	0.0640378	0.063799	0.0663731	0.0905603	0.0917674	0.12042	0.115703	0.152614	0.182796	0.204238	0.23585	0.23771	0.262725	0.255647	0.270178	0.253645	0.255037	0.253235	0.253852	0.245816	0.238595	0.231519	0.23116	0.219865	0.219379	0.211375	0.218702	0.214592	0.213717	0.210179	0.207557	0.211464	0.204474
Neuron_242	0.0698136	0.100933	0.0770354	0.0970958	0.135272	0.167557	0.230807	0.26041	0.246156	0.220794	0.224056	0.205629	0.207782	0.184521	0.206418	0.137003	0.151445	0.0821083	0.0977593	0.0985189	0.137332	0.134226	0.147846	0.137066	0.142016	0.139764	0.155782	0.153252	0.161787	0.164062	0.156107	0.160287	0.147475	0.158427	0.142384	0.159153	0.138172	0.156591	0.140405	0.158909	0.147126	0.161425	0.151437	0.158999	0.152132	0.159825	0.154566	0.16168	0.156445
Neuron_243	0.0224424	0.0917882	0.0709828	0.0306308	0.0249886	0.0280175	0.05436	0.0991183	0.0451128	0.126157	0.139438	0.19807	0.185899	0.242947	0.219085	0.251962	0.21602	0.199638	0.177779	0.192414	0.214219	0.224062	0.206583	0.170217	0.152173	0.169851	0.17111	0.186902	0.193134	0.193165	0.193816	0.175034	0.192198	0.18426	0.208142	0.189269	0.194317	0.185933	0.195317	0.191046	0.198311	0.196979	0.202478	0.195686	0.199102	0.19319	0.203227	0.202345	0.207122
Neuron_244	0.0727574	0.0560683	0.0183283	0.0755662	0.0198461	0.0579615	0.0897185	0.0941307	0.0710133	0.0167056	0.0348748	0.0592469	0.0190869	0.0614617	0.0322737	0.0418548	0.00414883	0.050192	0.0535768	0.043503	0.022196	0.00209081	0.0145983	0.0306481	0.0211829	0.0268966	0.0189009	0.0260914	0.0247234	0.0244743	0.016497	0.0273428	0.0195653	0.0354945	0.0236367	0.0426481	0.0258281	0.0373369	0.0252241	0.0363003	0.032743	0.0332513	0.0279009	0.02588	0.0220351	0.0166327	0.0121558	0.0115375	0.0117433
Neuron_245	0.0107199	0.0474932	0.0112426	0.0221016	0.00644103	0.0131548	0.127865	0.160035	0.154019	0.0808045	0.148228	0.169842	0.207705	0.144021	0.164851	0.111041	0.129244	0.1066	0.117735	0.0986431	0.097787	0.0868918	0.0766872	0.0653749	0.0628516	0.0840784	0.115507	0.124727	0.126399	0.127189	0.141217	0.147203	0.14158	0.155529	0.159964	0.177967	0.156298	0.160513	0.149903	0.162766	0.153316	0.151094	0.146832	0.150836	0.148963	0.148647	0.144077	0.149378	0.145609
Neuron_246	0.0191161	0.0158266	0.0195491	0.0596644	0.0282307	0.0566439	0.0667727	0.0920899	0.0636352	0.0108039	0.0443313	0.0166761	0.0999139	0.0923262	0.0966566	0.130444	0.140287	0.171409	0.124975	0.162668	0.184107	0.196196	0.19756	0.182552	0.190651	0.181385	0.162634	0.134686	0.123793	0.123074	0.1086	0.100147	0.0913246	0.0896104	0.0846848	0.078039	0.0773023	0.075911	0.0907454	0.0893291	0.0956937	0.0950751	0.098992	0.104374	0.103131	0.107289	0.102844	0.108392	0.109143
Neuron_247	0.0138298	0.0370064	0.032189	0.0908598	0.0772527	0.0394185	0.00453585	0.0996809	0.111542	0.0751858	0.0231089	0.0128056	0.031705	0.127322	0.0927943	0.0432405	0.0183348	0.000803662	0.00800339	0.00339757	8.76807e-05	0.0225878	0.0501884	0.0632285	0.0829978	0.0841647	0.0777648	0.0744214	0.05297	0.0490594	0.0242707	0.0132126	0.0149705	0.00750396	0.0123001	0.00173236	0.0133074	0.00851577	0.00835943	0.00081616	0.00207755	0.00904357	0.0207461	0.0318895	0.0317789	0.030049	0.0270073	0.0288245	0.0283461
Neuron_248	0.0960366	0.20725	0.225527	0.203234	0.141493	0.0831857	0.0826337	0.0972509	0.0596954	0.0665954	0.0139664	0.0106038	0.0313738	0.0345708	0.0587107	0.0581127	0.041427	0.0435971	0.0628712	0.105864	0.092973	0.0934522	0.0481846	0.0424412	0.0317187	0.0179559	0.0224687	0.00910727	0.0176524	0.012779	0.014249	0.0319845	0.0233285	0.02	0.0157528	0.0184032	0.0147339	0.0162925	0.00978084	0.0136495	0.000607776	0.00361684	0.00686259	0.00138923	0.0040172	0.0031529	0.00746036	0.0110119	0.00674483
Neuron_249	0.0929057	0.108911	0.00805873	0.00252358	0.00714616	0.011373	0.0159367	0.0193956	0.00368137	0.0819207	0.0734465	0.0334878	0.0732756	0.119988	0.126836	0.0731376	0.0152209	0.0331849	0.045941	0.0350791	0.0137174	0.00773626	0.03255	0.0576044	0.0959461	0.101948	0.118672	0.0957008	0.0969609	0.0936888	0.101776	0.0899986	0.0788011	0.064435	0.0619713	0.0497855	0.0444695	0.0310324	0.0296184	0.0166441	0.00813366	0.00231834	0.00634476	0.0146711	0.0173928	0.0211828	0.0170878	0.0215149	0.0202321
Neuron_250	0.0519742	0.0851215	0.0719653	0.117762	0.197352	0.237022	0.280128	0.288375	0.256058	0.207961	0.187993	0.179416	0.196105	0.18481	0.196172	0.180386	0.191881	0.168115	0.178805	0.158034	0.16996	0.151738	0.158512	0.146303	0.160501	0.169765	0.189206	0.185384	0.188204	0.195415	0.208264	0.219216	0.231667	0.243072	0.245862	0.250073	0.238777	0.240667	0.23331	0.241286	0.230467	0.234041	0.221752	0.223843	0.213515	0.216737	0.208958	0.212132	0.206304
Neuron_251	0.0229513	0.0895189	0.089215	0.145565	0.114441	0.126065	0.126315	0.139732	0.13993	0.088594	0.0524132	0.0460527	0.0361851	0.0620967	0.0718494	0.0818463	0.062684	0.0624811	0.0924722	0.101516	0.118075	0.1316	0.140947	0.142366	0.120028	0.116125	0.105589	0.127775	0.115185	0.125219	0.122977	0.136177	0.131234	0.129874	0.1382	0.141477	0.15092	0.146486	0.151317	0.150387	0.151161	0.146591	0.143796	0.140162	0.139679	0.132895	0.135351	0.128444	0.134411
Neuron_252	0.0518846	0.0944983	0.011854	0.0368041	0.0305275	0.0680039	0.107887	0.0654759	0.0873388	0.0525702	0.153492	0.112985	0.154121	0.107113	0.126235	0.175741	0.19572	0.19884	0.205754	0.203742	0.207294	0.191602	0.178556	0.181397	0.173811	0.187128	0.168027	0.174408	0.161092	0.15488	0.135358	0.132318	0.119835	0.132761	0.116129	0.121651	0.102202	0.106992	0.0945789	0.100108	0.0956238	0.103847	0.102713	0.109085	0.108423	0.112926	0.118312	0.120356	0.126541
Neuron_253	0.046948	0.0797333	0.0352333	0.112738	0.130902	0.174081	0.218145	0.209263	0.203503	0.0966439	0.081879	0.0678216	0.123989	0.0945681	0.138973	0.14929	0.150063	0.122177	0.120865	0.137977	0.152115	0.19385	0.192498	0.189308	0.174739	0.155672	0.163605	0.149512	0.161498	0.14954	0.150072	0.156611	0.136986	0.152539	0.138693	0.162041	0.147321	0.1558	0.149987	0.156817	0.158074	0.158432	0.157763	0.159484	0.153839	0.154416	0.14742	0.15477	0.150069
Neuron_254	0.0639864	0.0727885	0.0136183	0.00219491	0.0269672	0.130319	0.117493	0.10892	0.057263	0.0191581	0.00924198	0.00522938	0.0183622	0.045847	0.0138203	0.0320327	0.051127	0.094652	0.090285	0.100154	0.0865177	0.0936951	0.101974	0.088721	0.119258	0.115143	0.12	0.104599	0.100372	0.0877819	0.0703544	0.0510979	0.0316836	0.020745	0.0244443	0.0104188	0.00749505	0.00533148	0.00430175	0.0147589	0.011176	0.00710057	0.00113352	0.0109048	0.0111762	0.0183239	0.0160301	0.0245982	0.0239937
Neuron_255	0.0953098	0.0453352	0.00881974	0.121684	0.0634649	0.0823075	0.0685943	0.083307	0.0347369	0.0438256	0.0450572	0.0229948	0.0241154	0.0781686	0.129605	0.103084	0.139326	0.100377	0.0908807	0.0775179	0.102204	0.124198	0.121084	0.135386	0.126161	0.141811	0.138729	0.130344	0.137398	0.145288	0.149266	0.132396	0.131284	0.128467	0.119242	0.113602	0.0951278	0.102366	0.0886433	0.0920523	0.0769118	0.0839567	0.0846673	0.0827531	0.0824958	0.0800037	0.0859561	0.0888274	0.0920851
[truncated: 152 more columns]

## Sheet: u4
	Epoch_0	Epoch_1	Epoch_2	Epoch_3	Epoch_4	Epoch_5	Epoch_6	Epoch_7	Epoch_8	Epoch_9	Epoch_10	Epoch_11	Epoch_12	Epoch_13	Epoch_14	Epoch_15	Epoch_16	Epoch_17	Epoch_18	Epoch_19	Epoch_20	Epoch_21	Epoch_22	Epoch_23	Epoch_24	Epoch_25	Epoch_26	Epoch_27	Epoch_28	Epoch_29	Epoch_30	Epoch_31	Epoch_32	Epoch_33	Epoch_34	Epoch_35	Epoch_36	Epoch_37	Epoch_38	Epoch_39	Epoch_40	Epoch_41	Epoch_42	Epoch_43	Epoch_44	Epoch_45	Epoch_46	Epoch_47	Epoch_48
Neuron_0	0.0639113	0.0828882	0.0502936	0.168992	0.214342	0.174108	0.294687	0.097073	0.377068	0.601774	0.420154	0.544513	0.235825	0.152012	0.0487935	0.315567	0.299036	0.177171	0.448285	0.477852	0.794083	0.177221	0.146678	0.648177	0.408069	0.584568	0.0970922	0.441264	0.342016	0.348468	0.765437	0.178837	0.936508	0.0783508	0.560638	0.624306	0.565882	0.891371	0.795353	0.874108	0.188771	0.148137	0.719777	0.686116	0.388167	0.353986	0.39522	0.195838	0.338588
Neuron_1	0.0327898	0.202958	0.191887	0.267283	0.280157	0.292044	0.271297	0.407614	0.281812	0.101548	0.00115022	0.149154	0.467769	0.488774	0.242323	0.434754	0.06553	0.51428	0.79713	0.593956	0.481008	0.581576	0.525158	0.217155	0.133712	0.173114	0.300715	0.414676	0.495329	0.132286	0.0397645	0.0172301	0.25728	0.413042	0.38806	0.584299	0.386986	0.271608	0.68286	0.541316	0.712871	0.581074	0.383883	0.616582	0.352335	0.114271	0.544419	0.150869	0.567718
Neuron_2	0.0807826	0.0918045	0.160787	0.0633846	0.378095	0.465614	0.520116	0.636556	0.645837	0.582262	0.762339	0.402774	0.447165	0.650061	0.407074	0.180803	0.230828	0.240726	0.0175088	0.250069	0.00822993	0.103428	0.0309676	0.121947	0.149602	0.272194	0.0763107	0.0736182	0.643625	0.215072	0.485772	0.702091	0.683544	0.84718	0.618079	0.785249	0.571157	0.550705	0.350572	0.0236373	0.236492	0.20768	0.0213657	0.00574752	0.0903989	0.236158	0.587737	0.252548	0.524641
Neuron_3	0.0356562	0.0781619	0.116511	0.141814	0.490961	0.627867	0.60059	0.331654	0.43267	0.590904	0.514859	0.359569	0.402977	0.103457	0.169522	0.0943764	0.660081	0.0815931	0.255309	0.103166	0.402672	0.258475	0.584483	0.0549493	0.47298	0.478175	0.115115	0.896486	0.770521	0.436566	0.595906	0.572344	0.784991	0.788367	0.314616	0.887289	0.389132	0.368951	0.776362	0.192096	0.778984	0.170625	0.627662	0.399882	0.132582	0.862041	0.600002	0.699084	0.327814
Neuron_4	0.00128311	0.0546254	0.0804187	0.279106	0.0488312	0.121083	0.0425016	0.0691358	0.589048	0.602529	0.479753	0.487829	0.356016	0.54336	0.164644	0.0147464	0.445676	0.303663	0.010106	0.704719	0.550803	0.456322	0.380532	0.860429	0.0231748	0.655591	0.192889	0.681448	0.473583	0.377647	0.469065	0.586938	0.489185	0.504196	0.452788	0.272397	0.258246	0.132666	0.425939	0.244343	0.0755175	0.524158	0.285821	0.780578	0.0414111	0.319189	0.414491	0.300946	0.746521
Neuron_5	0.0526225	0.0181889	0.0269555	0.000492201	0.152944	0.407817	0.481573	0.32705	0.42819	0.651513	0.725793	0.723821	0.624433	0.380358	0.155428	0.158135	0.233883	0.630142	0.716136	0.740965	0.696496	0.937262	0.863434	0.823996	0.765181	0.604234	0.265537	0.0378392	0.126508	0.447983	0.554362	0.398382	0.118798	0.719201	0.387783	0.438646	0.393701	0.550034	0.343724	0.254341	0.0577552	0.187572	0.171563	0.234844	0.0818943	0.308535	0.519672	0.437343	0.523848
Neuron_6	0.037559	0.0900052	0.264164	0.143753	0.411031	0.460642	0.372038	0.612874	0.610955	0.545774	0.0833577	0.266579	0.190954	0.719726	0.130925	0.216776	0.404396	0.392905	0.622753	0.0472651	0.541359	0.393574	0.0284047	0.0996859	0.222925	0.58615	0.237991	0.803189	0.256652	0.366276	0.916878	0.459822	0.954967	0.0131561	0.499031	0.498834	0.180677	0.492172	0.478252	0.350847	0.103438	0.267851	0.37055	0.261553	0.694853	0.643935	0.605798	0.227829	0.748641
Neuron_7	0.0747143	0.121018	0.202875	0.195333	0.0852537	0.125307	0.223289	0.33805	0.193484	0.239049	0.525478	0.432959	0.0595213	0.10398	0.131679	0.253657	0.280844	0.637848	0.200926	0.117604	0.127287	0.265291	0.197313	0.0205972	0.745385	0.350409	0.626556	0.229725	0.84267	0.553117	0.361427	0.742844	0.33635	0.621603	0.0962809	0.671913	0.281532	0.343301	0.381461	0.552386	0.406532	0.146448	0.451813	0.0674621	0.5754	0.481775	0.373812	0.0556391	0.314862
Neuron_8	0.00866666	0.0353231	0.021156	0.0274996	0.0425244	0.170382	0.351545	0.0525179	0.188763	0.0723368	0.210337	0.289368	0.261446	0.191384	0.344688	0.0979281	0.151055	0.304975	0.843205	0.827883	0.679717	0.60723	0.814287	0.560288	0.0267389	0.406665	0.374447	0.375257	0.182441	0.684097	0.225029	0.217511	0.334849	0.671654	0.804821	0.0556111	0.548496	0.543646	0.2238	0.343532	0.769678	0.714682	0.678096	0.783229	0.380395	0.838026	0.11783	0.891976	0.404765
Neuron_9	0.0156937	0.055419	0.0535862	0.0936196	0.178092	0.00696535	0.0804241	0.333191	0.512452	0.525641	0.845379	0.835822	0.752769	0.731717	0.831057	0.75285	0.550144	0.826811	0.854037	0.830591	0.557063	0.774777	0.30813	0.52126	0.381673	0.305227	0.440797	0.216061	0.6532	0.518718	0.409623	0.358883	0.606475	0.439586	0.527761	0.729841	0.779355	0.774986	0.658321	0.786103	0.532384	0.877054	0.729586	0.723916	0.813809	0.590077	0.651178	0.0960996	0.296078
Neuron_10	0.0691087	0.0154385	0.120073	0.0754731	0.392165	0.209694	0.541981	0.553413	0.374013	0.387639	0.557596	0.32712	0.536204	0.0586066	0.292788	0.0525653	0.400968	0.225391	0.720449	0.174445	0.127913	0.505499	0.13664	0.62131	0.390425	0.225135	0.463406	0.10978	0.0939383	0.0297644	0.861345	0.33263	0.786193	0.278346	0.251633	0.592588	0.28787	0.604345	0.0485548	0.158958	0.485274	0.361155	0.218443	0.639318	0.680765	0.636141	0.141206	0.0131485	0.643897
Neuron_11	0.023352	0.0587427	0.0536318	0.241073	0.180955	0.0399173	0.00104101	0.0521963	0.400355	0.541263	0.633817	0.370173	0.577941	0.447172	0.810557	0.516667	0.196991	0.417674	0.607377	0.024403	0.564176	0.222779	0.198501	0.0982846	0.715231	0.427405	0.463475	0.488433	0.523393	0.29979	0.10752	0.136255	0.247687	0.135376	0.460256	0.189449	0.298079	0.493636	0.653328	0.57885	0.156661	0.607792	0.126586	0.0774443	0.174747	0.127828	0.162083	0.324479	0.0890745
Neuron_12	0.0420506	0.0449536	0.130887	0.139462	0.188416	0.049744	0.300423	0.255423	0.660194	0.788234	0.808981	0.871566	0.759856	0.79546	0.500395	0.549264	0.595375	0.102171	0.276127	0.372648	0.0860727	0.426091	0.693509	0.507657	0.402808	0.687454	0.36676	0.287253	0.313667	0.196331	0.562316	0.578479	0.127471	0.566184	0.75808	0.404996	0.834807	0.544999	0.476265	0.572576	0.2761	0.512953	0.118871	0.255518	0.12715	0.150566	0.336796	0.405413	0.642825
Neuron_13	0.0261876	0.119453	0.0400176	0.226962	0.295506	0.411359	0.252452	0.180073	0.38463	0.120338	0.542576	0.453384	0.592862	0.615899	0.513946	0.820318	0.232828	0.377861	0.510443	0.057082	0.0336885	0.424252	0.459369	0.164315	0.504243	0.476839	0.2589	0.734367	0.347261	0.344078	0.328851	0.026937	0.555878	0.430531	0.355008	0.315386	0.639508	0.430772	0.392074	0.0933158	0.349403	0.278597	0.175486	0.240355	0.316062	0.543679	0.507681	0.570289	0.111351
Neuron_14	0.00736303	0.0364538	0.168985	0.264083	0.283093	0.439705	0.616298	0.618524	0.76826	0.917545	0.903683	0.928175	0.878877	0.891984	0.798249	0.504434	0.573566	0.150669	0.273975	0.545239	0.231269	0.6865	0.658602	0.600355	0.393272	0.450807	0.346883	0.360812	0.680667	0.467609	0.438424	0.784987	0.226935	0.543026	0.680959	0.462013	0.736589	0.404759	0.795896	0.380737	0.388759	0.405971	0.09036	0.529306	0.125069	0.567703	0.585686	0.344575	0.620078
Neuron_15	0.084544	0.0822939	0.0720211	0.0830044	0.0767883	0.0336484	0.0578367	0.404915	0.498137	0.324127	0.612241	0.629056	0.185855	0.0172719	0.164717	0.192057	0.190604	0.351332	0.150025	0.205906	0.215931	0.227781	0.454139	0.0958473	0.297983	0.195611	0.0485158	0.128854	0.0564847	0.471834	0.119492	0.722245	0.299517	0.723701	0.37129	0.368301	0.720603	0.102957	0.422212	0.257939	0.277645	0.205952	0.347587	0.465872	0.219684	0.155618	0.107613	0.410135	0.496742
Neuron_16	0.0373613	0.206635	0.0914149	0.17453	0.0650378	0.112552	0.0314718	0.506324	0.239245	0.110775	0.181821	0.108765	0.0112327	0.294078	0.178591	0.0307269	0.124208	0.0457059	0.079117	0.418634	0.605835	0.00661384	0.635345	0.581785	0.101351	0.61887	0.00472976	0.0901885	0.278737	0.12791	0.180903	0.00352604	0.160945	0.129747	0.389224	0.432068	0.128951	0.364789	0.279637	0.398658	0.242495	0.250192	0.474735	0.663912	0.3382	0.0483132	0.563057	0.469271	0.814769
Neuron_17	0.00535158	0.0799492	0.0115727	0.150174	0.238114	0.399155	0.296754	0.387419	0.190865	0.0694075	0.0310949	0.440059	0.073295	0.124011	0.105899	0.0795408	0.440985	0.776671	0.127349	0.334657	0.226468	0.166116	0.111355	0.154815	0.17668	0.124998	0.0330585	0.457125	0.400085	0.788159	0.294118	0.522401	0.188112	0.669995	0.0349045	0.234082	0.281267	0.412687	0.148797	0.136443	0.336986	0.473429	0.33432	0.194217	0.0712144	0.492487	0.407463	0.371914	0.564367
Neuron_18	0.0238986	0.042396	0.0502442	0.194542	0.280305	0.278015	0.543216	0.520095	0.244368	0.0790548	0.356104	0.403131	0.10636	0.40027	0.429059	0.371115	0.590001	0.381875	0.222445	0.219939	0.0860397	0.43976	0.554483	0.354942	0.476758	0.477498	0.501175	0.77249	0.895971	0.86607	0.764784	0.625028	0.61621	0.819819	0.140847	0.768253	0.215983	0.497618	0.26052	0.411322	0.692796	0.622241	0.622198	0.0594643	0.546463	0.169107	0.0810958	0.67087	0.239709
Neuron_19	0.0367195	0.0740422	0.201394	0.218398	0.00488741	0.102628	0.000809251	0.00816769	0.38751	0.382027	0.330663	0.476309	0.495483	0.492083	0.0818008	0.363044	0.282207	0.308699	0.384504	0.0885288	0.534466	0.548562	0.0841008	0.206099	0.117398	0.186732	0.498533	0.195883	0.450298	0.27801	0.519527	0.443227	0.460911	0.607996	0.0875406	0.249183	0.606794	0.00834744	0.620188	0.159914	0.617418	0.104791	0.409972	0.303545	0.49235	0.0120972	0.0383555	0.0539433	0.323247
Neuron_20	0.0933121	0.133372	0.23029	0.00428501	0.00714069	0.0317924	0.0077897	0.446143	0.435098	0.385125	0.404754	0.682559	0.323295	0.394347	0.140658	0.234001	0.219152	0.433638	0.465094	0.765698	0.572597	0.703958	0.647211	0.594766	0.527894	0.427806	0.535104	0.142172	0.511477	0.00579971	0.317515	0.172993	0.0108703	0.133095	0.406328	0.00661357	0.318456	0.614779	0.129728	0.678501	0.0677876	0.619	0.144101	0.59407	0.379131	0.474265	0.635459	0.0577543	0.660848
Neuron_21	0.0714414	0.0942967	0.239523	0.0869039	0.202271	0.206438	0.299709	0.133024	0.427761	0.76344	0.634414	0.61926	0.632876	0.0232626	0.194265	0.14748	0.383885	0.458735	0.0384462	0.168994	0.681082	0.550185	0.668729	0.0848332	0.773918	0.164954	0.0760909	0.268798	0.276777	0.0150437	0.424121	0.349038	0.476135	0.350881	0.483102	0.323848	0.45474	0.257505	0.054611	0.442242	0.452513	0.446521	0.775609	0.776271	0.50883	0.0886511	0.0781957	0.293018	0.449122
Neuron_22	0.0566337	0.00952275	0.0350661	0.07632	0.000325785	0.11316	0.0647951	0.0145873	0.104318	0.14101	0.000195161	0.562933	0.115161	0.093192	0.177074	0.397604	0.0925263	0.305461	0.141145	0.436197	0.00925809	0.263049	0.42933	0.040314	0.573332	0.104201	0.067368	0.22865	0.408168	0.266079	0.288998	0.373275	0.219528	0.127958	0.585177	0.27457	0.5471	0.386409	0.219549	0.286281	0.502361	0.141733	0.139311	0.166139	0.469389	0.405246	0.518554	0.412964	0.215387
Neuron_23	0.0905643	0.18208	0.0920802	0.0799331	0.0681081	0.3248	0.494145	0.257286	0.535494	0.811531	0.672997	0.758855	0.669713	0.763849	0.874934	0.407032	0.687485	0.234925	0.229305	0.302755	0.602513	0.144983	0.534039	0.184142	0.130011	0.120191	0.0576016	0.792094	0.0599047	0.838711	0.314337	0.428469	0.915207	0.377696	0.961048	0.1772	0.832779	0.829863	0.737373	0.639506	0.197778	0.654107	0.245026	0.358638	0.0520815	0.731387	0.772419	0.839209	0.0201369
Neuron_24	0.0642121	0.00288097	0.034173	0.0156808	0.101361	0.106071	0.0434583	0.241426	0.510414	0.395439	0.16036	0.110488	0.251915	0.217504	0.196374	0.226902	0.00529534	0.575458	0.273811	0.275738	0.729289	0.608181	0.756284	0.501468	0.721486	0.678003	0.847511	0.551941	0.718245	0.326242	0.779367	0.539607	0.0382905	0.661442	0.197006	0.688506	0.0662625	0.47198	0.18419	0.025832	0.591905	0.0867197	0.53464	0.185121	0.784391	0.259481	0.620517	0.325397	0.836517
Neuron_25	0.0228898	0.0269473	0.0617782	0.019579	0.0926316	0.223799	0.143177	0.373604	0.336972	0.613396	0.492345	0.430858	0.659799	0.438997	0.50599	0.482018	0.683022	0.758359	0.576999	0.418391	0.455956	0.0545604	0.471212	0.145758	0.397422	0.129685	0.224371	0.312647	0.196383	0.290212	0.432424	0.580215	0.00976881	0.175099	0.00929225	0.804041	0.35976	0.871633	0.508708	0.0520341	0.776952	0.162814	0.605345	0.475916	0.0116662	0.498435	0.292697	0.189572	0.629875
Neuron_26	0.0476733	0.0386666	0.181137	0.183173	0.0531238	0.149213	0.0764353	0.11738	0.425973	0.115032	0.022573	0.219472	0.118261	0.167404	0.142814	0.0995605	0.292566	0.123204	0.0500184	0.11682	0.113561	0.694871	0.150164	0.454126	0.346141	0.66754	0.581182	0.0856083	0.51077	0.225415	0.520345	0.00348843	0.511476	0.174476	0.473678	0.314083	0.319746	0.00491643	0.632349	0.866275	0.789163	0.503979	0.189325	0.325186	0.583295	0.70562	0.764759	0.110375	0.355245
Neuron_27	0.0417418	0.0135122	0.0112728	0.0351825	0.159665	0.119608	0.115538	0.123378	0.0203554	0.0940495	0.169893	0.458806	0.211015	0.453215	0.471976	0.262948	0.401037	0.147047	0.436124	0.324648	0.483388	0.247542	0.0557483	0.222143	0.0191277	0.213373	0.542132	0.110406	0.193581	0.0950368	0.741435	0.367107	0.54335	0.0215535	0.650133	0.405875	0.504372	0.389557	0.0892362	0.080891	0.0539723	0.381809	0.0961097	0.0778185	0.0856534	0.062955	0.261032	0.231857	0.315599
Neuron_28	0.0935955	0.139958	0.210293	0.335847	0.271676	0.278307	0.536113	0.39522	0.195565	0.277947	0.0992055	0.0112904	0.049993	0.432215	0.184563	0.326579	0.519743	0.192267	0.246628	0.283651	0.753139	0.487995	0.494884	0.496579	0.544779	0.480211	0.359533	0.206553	0.117114	0.600083	0.541587	0.613137	0.649583	0.494397	0.262141	0.483998	0.56499	0.460232	0.19838	0.204182	0.0717037	0.134144	0.246961	0.216772	0.49682	0.411568	0.24819	0.713387	0.0911439
Neuron_29	0.0801598	0.157356	0.067011	0.247443	0.328999	0.481132	0.525915	0.443365	0.143684	0.323047	0.153636	0.300938	0.507313	0.38175	0.121682	0.0939323	0.1815	0.0968376	0.337992	0.655782	0.242649	0.264729	0.154755	0.0659926	0.437353	0.118634	0.0968499	0.468964	0.327228	0.488186	0.554759	0.205512	0.599338	0.126016	0.527444	0.10184	0.373656	0.310276	0.014863	0.08272	0.289205	0.47287	0.049132	0.290843	0.137842	0.478225	0.0901276	0.301652	0.324314
Neuron_30	0.0925353	0.0236061	0.174237	0.119585	0.42581	0.234224	0.280813	0.625416	0.480243	0.699302	0.560126	0.572417	0.277452	0.0625821	0.224946	0.322562	0.345633	0.200094	0.0206568	0.198297	0.0628799	0.677314	0.464131	0.480507	0.597749	0.00126099	0.428321	0.0128385	0.0910671	0.0586015	0.64136	0.308522	0.548877	0.617321	0.469165	0.657182	0.0882312	0.0992307	0.277631	0.556715	0.388564	0.195497	0.0308802	0.614429	0.853668	0.313872	0.555368	0.393126	0.179864
Neuron_31	0.0107189	0.00888852	0.0128019	0.150726	0.0958657	0.204128	0.0075534	0.219377	0.217466	0.14966	0.15379	0.143514	0.581936	0.225411	0.584667	0.532042	0.0902349	0.827924	0.24508	0.808064	0.405238	0.191932	0.260793	0.612317	0.245067	0.122268	0.666717	0.575568	0.14663	0.559962	0.874199	0.705596	0.093389	0.426562	0.611943	0.948337	0.300852	0.783124	0.541822	0.347681	0.811789	0.0610529	0.701489	0.792208	0.466234	0.421534	0.504868	0.42622	0.725678
Neuron_32	0.0166183	0.0279263	0.0267282	0.0127582	0.065791	0.141339	0.252193	0.303604	0.644511	0.409909	0.512363	0.600448	0.614075	0.618125	0.471578	0.36717	0.652762	0.255915	0.600074	0.444063	0.457034	0.674222	0.494423	0.397732	0.171791	0.0767707	0.0445709	0.153953	0.0978775	0.206752	0.418499	0.589557	0.521765	0.263378	0.750745	0.14889	0.480996	0.334557	0.20837	0.944361	0.0511706	0.864989	0.525225	0.546637	0.770976	0.0984612	0.603362	0.463203	0.0877131
Neuron_33	0.0246111	0.101961	0.124922	0.0662071	0.216313	0.260226	0.0164005	0.31296	0.54805	0.628139	0.625714	0.602563	0.468857	0.710262	0.652688	0.518591	0.0922613	0.37701	0.0940288	0.376011	0.499191	0.363697	0.204547	0.744905	0.545857	0.861048	0.388173	0.661745	0.81919	0.345593	0.117643	0.270197	0.316557	0.180702	0.0612259	0.464306	0.00734253	0.445888	0.303147	0.125812	0.527148	0.0346608	0.340137	0.0635225	0.428394	0.500639	0.513268	0.286603	0.68843
Neuron_34	0.0148449	0.013509	0.0272191	0.0664446	0.00864049	0.0507032	0.21859	0.129123	0.0575579	0.296199	0.430872	0.415404	0.329993	0.227841	0.22597	0.10867	0.180092	0.15921	0.35262	0.120747	0.480148	0.40874	0.0230026	0.203721	0.00766038	0.463163	0.187717	0.451702	0.153955	0.83513	0.314846	0.667048	0.409309	0.460234	0.755112	0.20613	0.551804	0.0284236	0.259598	0.023862	0.520871	0.279373	0.0779357	0.0670896	0.0481548	0.534782	0.0225685	0.754217	0.0945413
Neuron_35	0.0503283	0.0382479	0.184809	0.214494	0.346684	0.370042	0.53958	0.500805	0.444598	0.226533	0.716189	0.467426	0.677207	0.712655	0.239414	0.391559	0.0213241	0.243375	0.218828	0.11178	0.00447882	0.46045	0.540304	0.0907287	0.419195	0.345747	0.0679639	0.342693	0.213317	0.452412	0.101747	0.605468	0.0223525	0.891402	0.209437	0.755639	0.55531	0.0572961	0.58516	0.473332	0.300887	0.404746	0.285449	0.177767	0.259693	0.520446	0.708885	0.491916	0.0555716
Neuron_36	0.0882588	0.144848	0.0442546	0.299895	0.242297	0.188972	0.136219	0.0382032	0.162235	0.360818	0.227915	0.17287	0.338101	0.0786374	0.17381	0.344021	0.421642	0.276284	0.557652	0.583166	0.546475	0.491045	0.315014	0.710671	0.255733	0.260961	0.376128	0.65993	0.168986	0.267572	0.190079	0.0025723	0.14491	0.0601755	0.803105	0.37079	0.805946	0.0849586	0.635757	0.573112	0.000802712	0.838325	0.36921	0.852537	0.0740462	0.533612	0.33327	0.704103	0.191917
Neuron_37	0.0342191	0.180323	0.161661	0.117414	0.128462	0.322606	0.524104	0.531038	0.726818	0.699834	0.859761	0.867917	0.696033	0.374855	0.602777	0.590266	0.216195	0.112252	0.135933	0.359217	0.48058	0.0245335	0.116687	0.475916	0.409842	0.222419	0.651656	0.125333	0.413153	0.0995169	0.583482	0.314061	0.818851	0.625471	0.858803	0.835282	0.31806	0.834855	0.518547	0.893227	0.203946	0.717368	0.631821	0.0345949	0.737109	0.134814	0.777337	0.402406	0.231429
Neuron_38	0.0559303	0.035902	0.0522368	0.100212	0.0724544	0.235182	0.438903	0.0907	0.246048	0.365519	0.164087	0.0402608	0.368007	0.148614	0.445618	0.10801	0.0702742	0.2895	0.0938732	0.58173	0.0693752	0.244687	0.168536	0.344628	0.162859	0.154751	0.0776544	0.351642	0.585482	0.284297	0.0345889	0.695648	0.124332	0.478487	0.347665	0.187159	0.431151	0.152132	0.606513	0.0275198	0.661851	0.0291714	0.382774	0.492478	0.375852	0.308694	0.0910388	0.186536	0.251044
Neuron_39	0.0749731	0.00459111	0.0656722	0.0942828	0.0622741	0.118619	0.209367	0.295574	0.208543	0.38084	0.134381	0.405896	0.031194	0.159031	0.163121	0.0203042	0.307835	0.487505	0.24914	0.111813	0.270993	0.299979	0.290668	0.114775	0.150804	0.630622	0.120312	0.427868	0.066841	0.754496	0.0983084	0.42248	0.206815	0.124514	0.256501	0.325953	0.641532	0.190883	0.619755	0.356365	0.325676	0.0854861	0.0173695	0.441649	0.216968	0.129034	0.330484	0.0561654	0.221343
[truncated: 216 more rows]
[truncated: 152 more columns]

## Sheet: u5
	Epoch_0	Epoch_1	Epoch_2	Epoch_3	Epoch_4	Epoch_5	Epoch_6	Epoch_7	Epoch_8	Epoch_9	Epoch_10	Epoch_11	Epoch_12	Epoch_13	Epoch_14	Epoch_15	Epoch_16	Epoch_17	Epoch_18	Epoch_19	Epoch_20	Epoch_21	Epoch_22	Epoch_23	Epoch_24	Epoch_25	Epoch_26	Epoch_27	Epoch_28	Epoch_29	Epoch_30	Epoch_31	Epoch_32	Epoch_33	Epoch_34	Epoch_35	Epoch_36	Epoch_37	Epoch_38	Epoch_39	Epoch_40	Epoch_41	Epoch_42	Epoch_43	Epoch_44	Epoch_45	Epoch_46	Epoch_47	Epoch_48
[truncated: 256 more rows]
[truncated: 152 more columns]

[truncated: 5 more sheets: du1, du2, du3, du4, du5]
