# Supplementary material for: Adjoint propagation of error signal through modular recurrent neural networks for biologically plausible learning
Source: eLife. 2026 Feb 16;15:e108237. doi: 10.7554/eLife.108237 (PMC12959881; doi:10.7554/eLife.108237)
Supplement: Figure 3—source data 1. [file elife-108237-fig3-data1.xlsx]

## Sheet: b
O	0	0	0
A	-6.10654	2.70621	0.778751
B	-7.356	0.113202	0.840799
C	-7.52571	-0.361848	0.880202
D	-7.50809	-0.407488	0.923608
O'	0	0	0
A	-6.27905	2.77909	-0.643795
B	-7.53514	0.126802	-0.805204
C	-7.7026	-0.33641	-0.798821
D	-7.68578	-0.383963	-0.758694

## Sheet: e
O	0	0	0
A	-5.8393	3.08556	1.28663
B	-7.2874	1.33637	-0.641714
C	-7.52896	0.706527	-0.427363
D	-7.52947	0.619473	-0.391153
B	-7.2874	1.33637	-0.641714
	-7.70159	-0.0050444	0.613293
B'	-7.70124	-0.189927	0.796343
D	-7.52947	0.619473	-0.391153
	-7.69709	-0.0889568	0.660133
D'	-7.69087	-0.184305	0.816251

## Sheet: c
SR	2-2 (ave,min,max)	4-4 (ave,min,max)	8-8 (ave,min,max)	16-16 (ave,min,max)
0.01	[0.8662000000000001, 0.8655, 0.8669]	[0.8664, 0.8651, 0.8681]	[0.86564, 0.8644, 0.8668]	[0.86622, 0.864, 0.8673]
0.1	[0.8897600000000001, 0.8882, 0.8927]	[0.8896799999999999, 0.8888, 0.8907]	[0.8896000000000001, 0.8879, 0.8904]	[0.88988, 0.887, 0.8924]
0.25	[0.88978, 0.8887, 0.8916]	[0.88946, 0.8887, 0.8902]	[0.88964, 0.8874, 0.8912]	[0.88972, 0.888, 0.8911]
0.5	[0.8872, 0.8862, 0.8883]	[0.88728, 0.8855, 0.8884]	[0.8870000000000001, 0.8847, 0.8894]	[0.8880399999999999, 0.885, 0.8904]
0.75	[0.8816599999999999, 0.8802, 0.8824]	[0.8822599999999999, 0.8799, 0.8842]	[0.8814400000000001, 0.8776, 0.8878]	[0.88194, 0.878, 0.8849]
1	[0.8784600000000001, 0.8776, 0.8794]	[0.8772400000000001, 0.8738, 0.8806]	[0.8666999999999998, 0.8626, 0.8699]	[0.8653600000000001, 0.8617, 0.8719]
1.25	[0.87454, 0.8731, 0.8762]	[0.8651, 0.8612, 0.8694]	[0.83888, 0.8375, 0.841]	[0.8406, 0.8385, 0.8452]
1.5	[0.8724999999999999, 0.8704, 0.8741]	[0.8479599999999999, 0.8435, 0.8542]	[0.8035400000000001, 0.7984, 0.815]	[0.80664, 0.8029, 0.8094]
2	[0.8674, 0.8659, 0.8682]	[0.8124, 0.802, 0.8205]	[0.6239199999999999, 0.5955, 0.6505]	[0.60962, 0.5674, 0.6585]

## Sheet: f
SR	2-2 (ave,min,max)	4-2 (ave,min,max)	8-2 (ave,min,max)	16-2 (ave,min,max)
0.01	[0.82082, 0.8085, 0.8268]	[0.86632, 0.8649, 0.8677]	[0.86532, 0.8637, 0.8667]	[0.86584, 0.8642, 0.8673]
0.1	[0.8136199999999999, 0.8028, 0.8179]	[0.8873999999999999, 0.8864, 0.8892]	[0.8894399999999999, 0.8888, 0.8908]	[0.88942, 0.8876, 0.8919]
0.25	[0.72206, 0.6943, 0.7507]	[0.868, 0.8648, 0.8723]	[0.88948, 0.8872, 0.8921]	[0.8892199999999999, 0.8878, 0.8902]
0.5	[0.25644, 0.2362, 0.2845]	[0.82264, 0.808, 0.8361]	[0.88638, 0.8849, 0.8873]	[0.88824, 0.8877, 0.889]
0.75	[0.20358, 0.192, 0.2381]	[0.67088, 0.5926, 0.7691]	[0.83948, 0.8329, 0.8483]	[0.8839, 0.8815, 0.8864]
1	[0.17278000000000002, 0.1002, 0.2012]	[0.24194, 0.1985, 0.3039]	[0.73888, 0.7345, 0.7433]	[0.85656, 0.8533, 0.8624]
1.25	[0.19064, 0.1723, 0.2046]	[0.18394000000000002, 0.1681, 0.1985]	[0.42004, 0.3571, 0.4615]	[0.80182, 0.7988, 0.8034]
1.5	[0.19634000000000001, 0.1674, 0.2398]	[0.18462, 0.1698, 0.1982]	[0.22275999999999999, 0.1979, 0.2782]	[0.6872999999999999, 0.6692, 0.7017]
2	[0.21786, 0.1877, 0.2597]	[0.21244000000000002, 0.1875, 0.2667]	[0.21350000000000002, 0.1901, 0.2438]	[0.32611999999999997, 0.2709, 0.3887]
