# Supplementary material for: Adjoint propagation of error signal through modular recurrent neural networks for biologically plausible learning
Source: eLife. 2026 Feb 16;15:e108237. doi: 10.7554/eLife.108237 (PMC12959881; doi:10.7554/eLife.108237)
Supplement: Figure 4—source data 1. [file elife-108237-fig4-data1.xlsx]

## Sheet: a
Epoch	EP-32-10	EP-100-10	EP-500-10	AP-EPE-8-8	AP-STE-2-2
1	0.6005	0.8305	0.8336	0.6623	0.6589
2	0.7685	0.8444	0.85	0.7705	0.77
3	0.821	0.8501	0.8304	0.8099	0.8106
4	0.8182	0.8542	0.8516	0.8252	0.826
5	0.7619	0.853	0.8554	0.8329	0.8313
6	0.835	0.8538	0.8623	0.8393	0.8387
7	0.7665	0.864	0.8567	0.8451	0.8447
8	0.8379	0.8584	0.8702	0.8522	0.8514
9	0.8543	0.8706	0.8631	0.852	0.8532
10	0.8471	0.8638	0.8685	0.8576	0.8573
11	0.8525	0.8707	0.8617	0.8602	0.8615
12	0.8624	0.8727	0.8742	0.8602	0.8604
13	0.8282	0.8554	0.8753	0.8639	0.8606
14	0.8561	0.8698	0.869	0.8623	0.8645
15	0.8616	0.8725	0.8658	0.8651	0.8691
16	0.8645	0.8712	0.873	0.8681	0.8676
17	0.8489	0.8708	0.8689	0.8699	0.872
18	0.8552	0.865	0.8742	0.8701	0.8692
19	0.8688	0.8755	0.8792	0.8733	0.8736
20	0.8643	0.872	0.8676	0.8704	0.8734
21	0.8531	0.8758	0.868	0.8728	0.8744
22	0.8614	0.8791	0.87	0.8768	0.8773
23	0.8526	0.8651	0.8688	0.8758	0.8737
24	0.8674	0.8732	0.8753	0.8763	0.8753
25	0.8696	0.8828	0.8789	0.8777	0.8774
26	0.8421	0.8759	0.8679	0.8767	0.879
27	0.8616	0.8588	0.8736	0.8753	0.8796
28	0.8546	0.8734	0.8709	0.8774	0.8791
29	0.8682	0.8716	0.8692	0.8781	0.8781
30	0.8541	0.8705	0.8768	0.8813	0.8831
31	0.8561	0.874	0.868	0.8803	0.8813
32	0.8698	0.8534	0.8522	0.881	0.8826
33	0.8675	0.8691	0.879	0.8808	0.8836
34	0.8617	0.8792	0.8718	0.8819	0.8832
35	0.8741	0.8818	0.8711	0.8831	0.8844
36	0.8606	0.8676	0.8783	0.882	0.8822
37	0.8423	0.8613	0.8712	0.8838	0.8836
38	0.8727	0.865	0.8783	0.882	0.8857
39	0.8707	0.8699	0.8771	0.8824	0.8862
40	0.8608	0.867	0.8785	0.8822	0.8844
41	0.8607	0.8681	0.8716	0.8861	0.8852
42	0.8602	0.8573	0.8735	0.8843	0.8861
43	0.8699	0.8673	0.8855	0.8854	0.8873
44	0.8539	0.8767	0.8776	0.8842	0.8853
45	0.8507	0.8667	0.8766	0.8816	0.887
46	0.8546	0.867	0.871	0.8867	0.8893
47	0.8559	0.8659	0.8767	0.8848	0.8905
48	0.8565	0.8689	0.8769	0.8829	0.8898
49	0.8608	0.8734	0.876	0.8842	0.8907
50	0.8443	0.8673	0.8727	0.8828	0.8889
51	0.8725	0.8675	0.8701	0.8865	0.8872
52	0.8696	0.8606	0.8686	0.8842	0.8863
53	0.8536	0.8644	0.8786	0.8823	0.8905
54	0.8661	0.8737	0.8797	0.885	0.8838
55	0.8697	0.8712	0.8659	0.8848	0.8907
56	0.8543	0.8678	0.8712	0.8857	0.89
57	0.8617	0.8777	0.8757	0.8855	0.887
58	0.8612	0.8575	0.8737	0.8851	0.882
59	0.8691	0.8745	0.8424	0.8818	0.8886
60	0.865	0.8618	0.8737	0.8842	0.8891
61	0.8653	0.8641	0.8666	0.8863	0.8855
62	0.8603	0.8598	0.8678	0.888	0.8893
63	0.8667	0.8581	0.8681	0.8852	0.8856
64	0.8703	0.8656	0.8626	0.8843	0.8897
65	0.8574	0.8617	0.8857	0.8815	0.8881
66	0.8505	0.8702	0.8741	0.884	0.8855
67	0.8663	0.8654	0.854	0.8821	0.8892
68	0.8747	0.8665	0.8673	0.8832	0.8895
69	0.8571	0.8561	0.8804	0.8851	0.8849
70	0.8526	0.8658	0.8782	0.8885	0.8857
71	0.8545	0.866	0.8754	0.8827	0.8907
72	0.8567	0.849	0.8788	0.8796	0.8874
73	0.8706	0.8668	0.8684	0.8879	0.8869
74	0.8641	0.8701	0.8763	0.8828	0.889
75	0.8443	0.8718	0.8742	0.8857	0.8869
76	0.8622	0.8607	0.8699	0.8845	0.8865
77	0.8727	0.8684	0.8703	0.8848	0.8869
78	0.8748	0.876	0.8814	0.8836	0.8783
79	0.8765	0.8702	0.8784	0.8814	0.8892
80	0.8722	0.8543	0.8634	0.8867	0.8897
81	0.8633	0.8659	0.8735	0.8856	0.8855
82	0.8603	0.8679	0.8647	0.8826	0.888
83	0.8541	0.8608	0.8492	0.8817	0.8879
84	0.8395	0.8655	0.8762	0.8849	0.8866
85	0.8548	0.8613	0.8726	0.8834	0.886
86	0.8716	0.8667	0.8775	0.886	0.8882
87	0.8605	0.8585	0.8673	0.8845	0.8869
88	0.8578	0.8661	0.8748	0.8793	0.8864
89	0.865	0.865	0.8743	0.8851	0.8861
90	0.8605	0.8535	0.8724	0.8839	0.8874
91	0.8521	0.869	0.875	0.8861	0.8873
92	0.8716	0.8602	0.8682	0.8847	0.8878
93	0.8479	0.8592	0.8435	0.8865	0.8881
94	0.8742	0.8666	0.8734	0.8879	0.8815
95	0.8532	0.8629	0.8743	0.884	0.8859
96	0.8486	0.8687	0.8582	0.8832	0.889
97	0.8733	0.8599	0.8652	0.8822	0.8839
98	0.8632	0.8677	0.8529	0.8823	0.8889
99	0.8587	0.8566	0.8734	0.8826	0.8871
100	0.8643	0.8548	0.8538	0.8795	0.8881

## Sheet: b
Epoch	EP-32-10 Time	EP-32-10 Accuarcy	EP-100-10 Time	EP-100-10 Accuarcy	EP-500-10 Time	EP-500-10 Accuarcy	AP-EPE-8-8 Time	AP-EPE-8-8 Accuarcy	AP-STE-2-2 Time	AP-STE-2-2 Accuarcy
1	3.76337	0.6005	8.73715	0.8305	39.3835	0.8336	1.35964	0.6623	1.08574	0.6589
2	7.2934	0.7685	17.4382	0.8444	78.8091	0.85	2.73445	0.7705	2.15956	0.77
3	10.8769	0.821	26.1706	0.8501	118.256	0.8304	4.10573	0.8099	3.25236	0.8106
4	14.3798	0.8182	35.1339	0.8542	157.604	0.8516	5.43852	0.8252	4.35079	0.826
5	17.8909	0.7619	44.0036	0.853	196.921	0.8554	6.80398	0.8329	5.4265	0.8313
6	21.4184	0.835	52.8108	0.8538	236.298	0.8623	8.13288	0.8393	6.52051	0.8387
7	24.9477	0.7665	61.6287	0.864	275.634	0.8567	9.45341	0.8451	7.61845	0.8447
8	28.4758	0.8379	70.4787	0.8584	315.107	0.8702	10.7819	0.8522	8.69078	0.8514
9	32.0559	0.8543	79.2984	0.8706	354.486	0.8631	12.1463	0.852	9.78628	0.8532
10	35.5924	0.8471	88.1092	0.8638	393.795	0.8685	13.5052	0.8576	10.8672	0.8573
11	39.1293	0.8525	96.9609	0.8707	433.193	0.8617	14.8678	0.8602	11.9489	0.8615
12	42.6303	0.8624	105.948	0.8727	472.601	0.8742	16.2202	0.8602	13.0099	0.8604
13	46.1299	0.8282	114.917	0.8554	511.97	0.8753	17.5595	0.8639	14.0541	0.8606
14	49.735	0.8561	123.818	0.8698	551.398	0.869	18.9052	0.8623	15.1196	0.8645
15	53.3855	0.8616	132.929	0.8725	590.777	0.8658	20.2799	0.8651	16.209	0.8691
16	57.0438	0.8645	142.042	0.8712	630.097	0.873	21.6332	0.8681	17.2703	0.8676
17	60.6535	0.8489	151.077	0.8708	669.505	0.8689	22.9859	0.8699	18.3354	0.872
18	64.2332	0.8552	159.886	0.865	708.882	0.8742	24.3186	0.8701	19.4099	0.8692
19	67.8099	0.8688	168.786	0.8755	748.241	0.8792	25.6771	0.8733	20.5062	0.8736
20	71.3326	0.8643	177.676	0.872	787.591	0.8676	27.0215	0.8704	21.6034	0.8734
21	74.8695	0.8531	186.57	0.8758	826.98	0.868	28.3994	0.8728	22.6567	0.8744
22	78.4454	0.8614	195.513	0.8791	866.427	0.87	29.7348	0.8768	23.7562	0.8773
23	82.0173	0.8526	204.338	0.8651	905.824	0.8688	31.0656	0.8758	24.8729	0.8737
24	85.6331	0.8674	213.071	0.8732	945.27	0.8753	32.3955	0.8763	25.9465	0.8753
25	89.2373	0.8696	221.77	0.8828	984.761	0.8789	33.7689	0.8777	26.9991	0.8774
26	92.8143	0.8421	230.514	0.8759	1024.11	0.8679	35.1482	0.8767	28.0665	0.879
27	96.3624	0.8616	239.227	0.8588	1063.55	0.8736	36.4734	0.8753	29.1369	0.8796
28	100.015	0.8546	247.971	0.8734	1103.07	0.8709	37.8097	0.8774	30.2184	0.8791
29	103.631	0.8682	256.71	0.8716	1142.5	0.8692	39.1464	0.8781	31.3007	0.8781
30	107.185	0.8541	265.414	0.8705	1182.02	0.8768	40.4916	0.8813	32.4118	0.8831
31	110.731	0.8561	274.199	0.874	1221.53	0.868	41.8197	0.8803	33.4658	0.8813
32	114.305	0.8698	282.928	0.8534	1261.1	0.8522	43.1763	0.881	34.531	0.8826
33	117.867	0.8675	291.674	0.8691	1300.63	0.879	44.5089	0.8808	35.6229	0.8836
34	121.435	0.8617	300.452	0.8792	1340.11	0.8718	45.8613	0.8819	36.7027	0.8832
35	125.055	0.8741	309.257	0.8818	1379.53	0.8711	47.2048	0.8831	37.7848	0.8844
36	128.644	0.8606	318.017	0.8676	1419	0.8783	48.5323	0.882	38.8571	0.8822
37	132.21	0.8423	326.766	0.8613	1458.69	0.8712	49.8469	0.8838	39.948	0.8836
38	135.779	0.8727	335.527	0.865	1498.47	0.8783	51.1783	0.882	41.0124	0.8857
39	139.359	0.8707	344.251	0.8699	1538.24	0.8771	52.5178	0.8824	42.1161	0.8862
40	143.022	0.8608	353.01	0.867	1577.99	0.8785	53.8398	0.8822	43.1726	0.8844
41	146.649	0.8607	361.762	0.8681	1617.71	0.8716	55.1886	0.8861	44.2665	0.8852
42	150.157	0.8602	370.579	0.8573	1657.53	0.8735	56.5085	0.8843	45.3951	0.8861
43	153.7	0.8699	379.307	0.8673	1697.39	0.8855	57.8502	0.8854	46.5031	0.8873
44	157.226	0.8539	388.039	0.8767	1737.24	0.8776	59.2004	0.8842	47.5819	0.8853
45	160.774	0.8507	396.732	0.8667	1777.01	0.8766	60.5075	0.8816	48.667	0.887
46	164.445	0.8546	405.458	0.867	1816.78	0.871	61.8572	0.8867	49.728	0.8893
47	168.1	0.8559	414.212	0.8659	1856.61	0.8767	63.1956	0.8848	50.8129	0.8905
48	171.717	0.8565	422.938	0.8689	1896.35	0.8769	64.5591	0.8829	51.8997	0.8898
49	175.386	0.8608	431.631	0.8734	1936.27	0.876	65.9017	0.8842	52.9825	0.8907
50	178.951	0.8443	440.383	0.8673	1976.19	0.8727	67.2302	0.8828	54.0696	0.8889
51	182.481	0.8725	449.114	0.8675	2016.08	0.8701	68.5882	0.8865	55.1514	0.8872
52	186.112	0.8696	457.848	0.8606	2055.93	0.8686	69.9428	0.8842	56.2317	0.8863
53	189.754	0.8536	466.559	0.8644	2095.74	0.8786	71.269	0.8823	57.3079	0.8905
54	193.343	0.8661	475.266	0.8737	2135.69	0.8797	72.6209	0.885	58.3885	0.8838
55	196.971	0.8697	484.013	0.8712	2175.63	0.8659	73.9834	0.8848	59.4753	0.8907
56	200.579	0.8543	492.717	0.8678	2215.73	0.8712	75.3317	0.8857	60.5736	0.89
57	204.215	0.8617	501.482	0.8777	2255.58	0.8757	76.6606	0.8855	61.6271	0.887
58	207.834	0.8612	510.218	0.8575	2295.51	0.8737	77.9988	0.8851	62.7264	0.882
59	211.358	0.8691	518.943	0.8745	2335.75	0.8424	79.3547	0.8818	63.8117	0.8886
60	214.915	0.865	527.715	0.8618	2375.91	0.8737	80.7054	0.8842	64.9006	0.8891
61	218.467	0.8653	536.443	0.8641	2417.47	0.8666	82.0563	0.8863	65.9876	0.8855
62	222.029	0.8603	545.163	0.8598	2459.4	0.8678	83.4042	0.888	67.0834	0.8893
63	225.611	0.8667	553.897	0.8581	2501.21	0.8681	84.7298	0.8852	68.182	0.8856
64	229.182	0.8703	562.615	0.8656	2542.81	0.8626	86.0837	0.8843	69.2553	0.8897
65	232.726	0.8574	571.386	0.8617	2584.4	0.8857	87.4328	0.8815	70.3286	0.8881
66	236.259	0.8505	580.092	0.8702	2626.01	0.8741	88.7831	0.884	71.3989	0.8855
67	239.795	0.8663	588.841	0.8654	2667.68	0.854	90.1398	0.8821	72.4696	0.8892
68	243.429	0.8747	597.546	0.8665	2709.38	0.8673	91.4913	0.8832	73.5584	0.8895
69	246.984	0.8571	606.259	0.8561	2751.11	0.8804	92.8269	0.8851	74.6257	0.8849
70	250.609	0.8526	614.956	0.8658	2792.82	0.8782	94.1633	0.8885	75.7156	0.8857
71	254.226	0.8545	623.659	0.866	2834.6	0.8754	95.4994	0.8827	76.8232	0.8907
72	257.814	0.8567	632.414	0.849	2876.35	0.8788	96.8202	0.8796	77.8761	0.8874
73	261.344	0.8706	641.142	0.8668	2918.11	0.8684	98.1653	0.8879	78.9973	0.8869
74	264.982	0.8641	649.846	0.8701	2959.9	0.8763	99.5434	0.8828	80.1185	0.889
75	268.622	0.8443	658.564	0.8718	3001.71	0.8742	100.878	0.8857	81.1858	0.8869
76	272.293	0.8622	667.275	0.8607	3044.68	0.8699	102.212	0.8845	82.2513	0.8865
77	275.798	0.8727	676.01	0.8684	3087.71	0.8703	103.573	0.8848	83.3353	0.8869
78	279.397	0.8748	684.71	0.876	3132.85	0.8814	104.896	0.8836	84.4245	0.8783
79	283.003	0.8765	693.433	0.8702	3177.99	0.8784	106.233	0.8814	85.5146	0.8892
80	286.629	0.8722	702.211	0.8543	3223.1	0.8634	107.549	0.8867	86.5894	0.8897
81	290.241	0.8633	710.912	0.8659	3268.17	0.8735	108.879	0.8856	87.68	0.8855
82	293.789	0.8603	719.657	0.8679	3313.16	0.8647	110.221	0.8826	88.7381	0.888
83	297.39	0.8541	728.354	0.8608	3358.02	0.8492	111.589	0.8817	89.8218	0.8879
84	300.893	0.8395	737.065	0.8655	3402.82	0.8762	112.921	0.8849	90.9026	0.8866
85	304.395	0.8548	745.784	0.8613	3447.5	0.8726	114.247	0.8834	91.9939	0.886
86	307.88	0.8716	754.504	0.8667	3492.49	0.8775	115.633	0.886	93.0617	0.8882
87	311.379	0.8605	763.242	0.8585	3533.93	0.8673	116.96	0.8845	94.1262	0.8869
88	314.862	0.8578	771.979	0.8661	3573.46	0.8748	118.319	0.8793	95.2177	0.8864
89	318.495	0.865	780.714	0.865	3613.06	0.8743	119.707	0.8851	96.295	0.8861
90	321.994	0.8605	789.413	0.8535	3652.64	0.8724	121.096	0.8839	97.3865	0.8874
91	325.561	0.8521	798.239	0.869	3692.25	0.875	122.45	0.8861	98.4668	0.8873
92	329.166	0.8716	806.988	0.8602	3731.79	0.8682	123.793	0.8847	99.5171	0.8878
93	332.657	0.8479	815.689	0.8592	3771.47	0.8435	125.126	0.8865	100.617	0.8881
94	336.099	0.8742	824.334	0.8666	3811.14	0.8734	126.499	0.8879	101.717	0.8815
95	339.525	0.8532	833.04	0.8629	3850.86	0.8743	127.842	0.884	102.798	0.8859
96	343.012	0.8486	841.716	0.8687	3890.49	0.8582	129.173	0.8832	103.871	0.889
97	346.624	0.8733	850.38	0.8599	3930.11	0.8652	130.538	0.8822	104.962	0.8839
98	350.035	0.8632	859.036	0.8677	3969.76	0.8529	131.887	0.8823	106.061	0.8889
99	353.468	0.8587	867.703	0.8566	4009.39	0.8734	133.225	0.8826	107.134	0.8871
100	356.882	0.8643	876.348	0.8548	4048.98	0.8538	134.585	0.8795	108.198	0.8881

## Sheet: c
Epoch	EP-32-10 Time	EP-32-10 Accuarcy	EP-100-10 Time	EP-100-10 Accuarcy	EP-500-10 Time	EP-500-10 Accuarcy	AP-EPE-8-8 Time	AP-EPE-8-8 Accuarcy	AP-STE-2-2 Time	AP-STE-2-2 Accuarcy
1	4.72916	0.2892	12.1324	0.7867	54.107	0.8251	2.12177	0.5816	1.66592	0.6154
2	9.47217	0.3833	24.1759	0.7604	108.309	0.8214	4.14798	0.7583	3.19531	0.7609
3	14.1784	0.4129	36.0765	0.7751	162.39	0.8508	6.17655	0.8031	4.7414	0.8052
4	18.9404	0.1966	48.136	0.8033	216.503	0.8503	8.21751	0.8215	6.2664	0.8219
5	23.6886	0.2959	60.178	0.8294	270.51	0.8472	10.2503	0.8264	7.82711	0.8308
6	28.4172	0.294	71.9981	0.8238	324.648	0.8488	12.2524	0.8361	9.35597	0.8374
7	33.1248	0.2946	83.8401	0.8279	378.714	0.8506	14.245	0.8431	10.8965	0.8443
8	37.8457	0.2916	95.632	0.8222	432.834	0.8618	16.2493	0.8488	12.421	0.8488
9	42.5663	0.2939	107.591	0.8369	486.914	0.8626	18.2821	0.8519	14.0189	0.8531
10	47.2772	0.2939	119.457	0.8442	540.934	0.8592	20.2926	0.8567	15.5649	0.8572
11	52.0021	0.2917	131.357	0.8443	594.903	0.8664	22.3265	0.8587	17.113	0.8598
12	56.7161	0.2924	143.201	0.8496	648.788	0.8696	24.3745	0.8617	18.6219	0.8624
13	61.4198	0.2926	155.07	0.8429	702.737	0.8572	26.3867	0.8637	20.1674	0.8673
14	66.1425	0.2904	166.956	0.8504	756.687	0.8619	28.4119	0.8662	21.6883	0.8668
15	70.8608	0.289	178.797	0.8407	810.599	0.8476	30.4512	0.868	23.229	0.8691
16	75.5556	0.2893	190.615	0.8391	864.589	0.8611	32.4463	0.8694	24.7737	0.87
17	80.2909	0.2923	202.474	0.8366	918.543	0.8717	34.4727	0.8682	26.3138	0.8692
18	84.9994	0.2911	214.391	0.8283	972.541	0.872	36.464	0.8676	27.8828	0.8708
19	89.7246	0.2961	226.223	0.8573	1026.32	0.8595	38.5106	0.8724	29.4325	0.8753
20	94.464	0.2923	238.024	0.8303	1080.26	0.8649	40.5525	0.8736	30.9604	0.8734
21	99.2118	0.2955	249.863	0.8334	1134.12	0.8693	42.5803	0.8732	32.514	0.8755
22	103.922	0.2955	261.714	0.8043	1188.15	0.8678	44.5987	0.8744	34.0431	0.8757
23	108.663	0.2957	273.564	0.8382	1242.17	0.8702	46.606	0.8759	35.619	0.8784
24	113.383	0.2874	285.445	0.8223	1296.22	0.8656	48.6581	0.875	37.1548	0.8768
25	118.117	0.29	297.34	0.8256	1350.13	0.867	50.6683	0.8716	38.7281	0.8786
26	122.836	0.2937	309.185	0.7533	1404.14	0.8643	52.6927	0.878	40.2471	0.8787
27	127.55	0.2948	321.039	0.753	1458.14	0.8612	54.7377	0.8779	41.7958	0.8807
28	132.276	0.2923	332.913	0.7718	1512.16	0.8725	56.7645	0.88	43.3391	0.8806
29	136.98	0.2928	344.768	0.7998	1566.25	0.8723	58.7989	0.8821	44.8709	0.8803
30	141.679	0.29	356.664	0.8295	1620.15	0.8642	60.81	0.8801	46.4139	0.8834
31	146.417	0.2957	368.502	0.8206	1674.19	0.8689	62.8337	0.8794	47.9334	0.8801
32	151.18	0.2888	380.362	0.8294	1728.11	0.8561	64.864	0.8816	49.474	0.8769
33	155.909	0.2931	392.246	0.8042	1782.1	0.8734	66.8959	0.8787	51.0248	0.8833
34	160.594	0.2934	404.145	0.7821	1836.02	0.8591	68.9085	0.883	52.5547	0.8833
35	165.307	0.2957	416.043	0.7937	1889.89	0.8678	70.9099	0.8828	54.0951	0.8828
36	169.998	0.2951	427.951	0.7279	1943.64	0.8722	72.94	0.8842	55.6326	0.882
37	174.723	0.2936	439.809	0.7617	1997.46	0.8763	74.9272	0.8826	57.1753	0.8814
38	179.444	0.2946	451.752	0.7464	2051.28	0.8685	76.9699	0.8825	58.7122	0.8833
39	184.161	0.2917	463.658	0.7274	2105.11	0.8665	78.999	0.883	60.2074	0.8865
40	188.876	0.2915	475.51	0.7416	2158.96	0.8703	81.0434	0.8842	61.7414	0.8836
41	193.598	0.2945	487.375	0.7071	2212.87	0.8671	83.0729	0.8851	63.3533	0.8855
42	198.35	0.2931	499.223	0.6917	2266.74	0.8616	85.0796	0.8854	64.8856	0.8836
43	203.082	0.2923	511.075	0.6459	2320.84	0.854	87.0939	0.8861	66.4202	0.8838
44	207.771	0.2921	522.952	0.6594	2374.6	0.8736	89.1563	0.8882	67.9522	0.8868
45	212.481	0.2901	534.8	0.5825	2429.96	0.8724	91.1902	0.8857	69.4823	0.8859
46	217.229	0.2955	546.671	0.4791	2483.72	0.872	93.2338	0.8855	71.0112	0.8874
47	221.964	0.2842	558.528	0.3425	2537.72	0.8674	95.2427	0.8863	72.5407	0.8855
48	226.683	0.2918	570.388	0.4639	2591.5	0.8729	97.2497	0.8882	74.0862	0.8879
49	231.39	0.288	582.236	0.3891	2645.41	0.868	99.2824	0.8852	75.6203	0.8869
50	236.116	0.2935	594.102	0.4363	2699.24	0.8717	101.281	0.8884	77.1215	0.8859
51	240.854	0.2928	605.992	0.3794	2753.09	0.8625	103.291	0.8889	78.6664	0.887
52	245.554	0.293	617.855	0.4285	2806.89	0.8583	105.346	0.8868	80.2124	0.8858
53	250.298	0.2932	629.771	0.4646	2860.7	0.8605	107.355	0.8842	81.7409	0.8888
54	255.017	0.2882	641.667	0.4547	2914.48	0.8591	109.349	0.8891	83.2861	0.888
55	259.796	0.2923	653.551	0.521	2968.35	0.8772	111.356	0.8897	84.8423	0.8874
56	264.521	0.2904	665.453	0.4949	3023.13	0.8565	113.377	0.8876	86.3761	0.8895
57	269.235	0.2915	677.315	0.519	3084.2	0.8685	115.361	0.8868	87.9181	0.8884
58	273.954	0.2936	689.176	0.6876	3145.5	0.8694	117.405	0.8861	89.459	0.885
59	278.701	0.2902	700.978	0.6754	3206.78	0.8704	119.384	0.8865	90.9716	0.8865
60	283.401	0.2919	712.87	0.7077	3268.13	0.8773	121.416	0.8891	92.5508	0.8892
61	288.105	0.2933	724.687	0.697	3329.42	0.8691	123.441	0.8876	94.0896	0.888
62	292.821	0.2938	736.586	0.6774	3390.52	0.8673	125.447	0.8825	95.6286	0.8865
63	297.542	0.2948	748.479	0.6837	3451.77	0.8729	127.458	0.8879	97.1618	0.8835
64	302.228	0.296	760.336	0.7236	3513.07	0.8589	129.482	0.8892	98.6908	0.8868
65	306.963	0.2937	772.173	0.7077	3574.42	0.8697	131.503	0.8914	100.191	0.8882
66	311.641	0.2951	784.059	0.6923	3635.76	0.8575	133.522	0.8915	101.748	0.889
67	316.346	0.2931	795.878	0.6925	3696.97	0.8669	135.518	0.8884	103.288	0.8909
68	321.097	0.2877	807.754	0.7237	3758.14	0.8618	137.562	0.8894	104.805	0.8879
69	325.814	0.2944	819.601	0.7297	3819.22	0.8662	139.581	0.887	106.331	0.8855
70	330.51	0.2956	831.479	0.7223	3880.32	0.8655	141.591	0.8903	107.875	0.8885
71	335.252	0.2941	843.332	0.704	3941.45	0.8705	143.619	0.889	109.426	0.8867
72	339.94	0.29	855.236	0.7163	4002.43	0.869	145.657	0.8878	110.993	0.89
73	344.634	0.2941	867.14	0.7264	4063.57	0.8712	147.687	0.8848	112.514	0.8862
74	349.333	0.2942	879.007	0.716	4124.68	0.8653	149.725	0.8872	114.041	0.8846
75	354.055	0.2915	890.86	0.6918	4185.83	0.8653	151.721	0.8876	115.579	0.8871
76	358.751	0.2905	902.993	0.7171	4247.15	0.8715	153.754	0.8893	117.107	0.887
77	363.442	0.2944	915.371	0.7312	4308.58	0.8637	155.769	0.8899	118.671	0.8867
78	368.203	0.2942	927.195	0.7208	4370.03	0.8461	157.819	0.8882	120.196	0.891
79	372.918	0.2933	939.338	0.692	4431.66	0.8727	159.843	0.8873	121.746	0.891
80	377.634	0.2937	951.127	0.7272	4493.28	0.8674	161.835	0.8884	123.288	0.8882
81	382.357	0.2933	962.937	0.7093	4554.86	0.8691	163.85	0.885	124.833	0.8885
82	387.065	0.2944	974.719	0.6788	4616.49	0.8568	165.908	0.8868	126.373	0.8848
83	391.773	0.2923	986.516	0.6965	4678.12	0.8513	167.914	0.8888	127.905	0.8893
84	396.481	0.2901	998.469	0.723	4739.73	0.8591	169.912	0.8892	129.454	0.8842
85	401.19	0.294	1010.32	0.6944	4800.84	0.8661	171.921	0.8868	130.98	0.8886
86	405.886	0.2929	1022.19	0.7142	4861.97	0.8719	173.916	0.8864	132.491	0.8859
87	410.569	0.2934	1033.99	0.7754	4923.22	0.8628	175.93	0.886	134.024	0.8871
88	415.287	0.2946	1046.06	0.8023	4984.5	0.8619	177.946	0.8869	135.573	0.8874
89	419.993	0.295	1057.99	0.8113	5046.01	0.8681	179.996	0.8888	137.11	0.8879
90	424.694	0.2928	1069.86	0.8093	5107.41	0.8657	182.039	0.8854	138.632	0.8862
91	429.403	0.291	1081.76	0.8236	5169.15	0.8555	184.033	0.8897	140.179	0.8901
92	434.109	0.296	1093.6	0.7905	5230.58	0.8708	186.039	0.8827	141.723	0.8903
93	438.83	0.2879	1105.46	0.812	5291.82	0.8613	188.074	0.8897	143.248	0.8862
94	443.522	0.2942	1117.33	0.7968	5353.09	0.8579	190.053	0.8902	144.753	0.8701
95	448.209	0.2921	1129.14	0.8022	5414.33	0.8521	192.07	0.8858	146.272	0.8866
96	453.031	0.294	1140.96	0.7912	5475.64	0.8702	194.099	0.887	147.801	0.8887
97	458.154	0.2962	1152.77	0.8088	5536.92	0.8644	196.131	0.8845	149.328	0.8886
98	463.01	0.294	1164.6	0.7993	5598.05	0.8535	198.175	0.8885	150.848	0.8892
99	467.7	0.294	1176.42	0.7954	5659.41	0.8573	200.233	0.8844	152.376	0.8902
100	472.454	0.2893	1188.26	0.8006	5720.81	0.8571	202.248	0.8866	153.914	0.8876

## Sheet: d
Number of layers	AP(mean, min, max)	FA(mean, min, max)	BP(mean, min, max)	FA(2e-4)(mean, min, max)	BP(2e-4)(mean, min, max)
1	[0.8912599999999999, 0.8901, 0.8926]	[0.89528, 0.8938, 0.8964]	[0.89666, 0.8953, 0.8982]	[0.8963000000000001, 0.8945, 0.8993]	[0.8971, 0.8957, 0.8982]
3	[0.8888399999999999, 0.887, 0.8903]	[0.89358, 0.8931, 0.8941]	[0.89814, 0.8964, 0.8997]	[0.89092, 0.8896, 0.894]	[0.8925599999999999, 0.8904, 0.8941]
5	[0.88742, 0.886, 0.8883]	[0.8847200000000001, 0.8833, 0.8876]	[0.8958999999999999, 0.8943, 0.8971]	[0.88724, 0.8862, 0.8881]	[0.8895, 0.8883, 0.8903]
10	[0.8794000000000001, 0.8763, 0.881]	[0.7974, 0.7774, 0.821]	[0.8953200000000001, 0.8944, 0.8965]	[0.8773799999999999, 0.8767, 0.8786]	[0.8853200000000001, 0.882, 0.8869]

## Sheet: e
Number of layers	AP without role constraint (8-4)(mean, min, max)	AP with role constraint (8-4)(mean, min, max)	AP without role constraint (16-8)(mean, min, max)	AP without role constraint (16-8, 1024 neurons per block)(mean, min, max)
1	[0.8915, 0.8899, 0.8929]	[0.8912599999999999, 0.8901, 0.8926]	[0.8922000000000001, 0.8908, 0.894]	[0.89408, 0.8927, 0.8959]
3	[0.89316, 0.8904, 0.8946]	[0.8888399999999999, 0.887, 0.8903]	[0.89388, 0.8909, 0.8971]	[0.8923400000000001, 0.8908, 0.8945]
5	[0.88262, 0.881, 0.8856]	[0.88742, 0.886, 0.8883]	[0.88872, 0.8874, 0.8902]	[0.85656, 0.8544, 0.8587]
10	[0.17538, 0.1004, 0.3258]	[0.8794000000000001, 0.8763, 0.881]	[0.82212, 0.8161, 0.8283]	[0.6910000000000001, 0.6602, 0.7041]

## Sheet: f
Number of layers	AP with role constraint(mean, min, max)	AP without role constraint(mean, min, max)
4	[0.51348, 0.4393, 0.6074]	[0.76326, 0.7406, 0.7781]
16	[0.8325400000000001, 0.8272, 0.8385]	[0.8608, 0.8599, 0.8626]
64	[0.8751800000000001, 0.8741, 0.8759]	[0.88394, 0.8822, 0.8871]
256	[0.8901600000000001, 0.8886, 0.8915]	[0.89194, 0.8909, 0.8928]
1024	[0.8941400000000002, 0.8926, 0.8968]	[0.89696, 0.8962, 0.8985]

## Sheet: g
The number of neurons in X block	AP(2-HL, X=SE)(mean, min, max)	AP(1-HL, X=RE)(mean, min, max)	AP(2-HL, X=RE)(mean, min, max)	AP(3-HL, X=RE)(mean, min, max)
0	[0.8441599999999999, 0.8427, 0.8458]	[0.7997799999999999, 0.797, 0.8043]	[0.6673600000000001, 0.6562, 0.6812]	[0.45047999999999994, 0.4029, 0.5221]
1	[0.8745, 0.8712, 0.8768]	[0.87074, 0.8665, 0.8743]	[0.82896, 0.7838, 0.8531]	[0.75798, 0.7107, 0.7984]
2	[0.88142, 0.8792, 0.8858]	[0.87784, 0.8755, 0.8803]	[0.87292, 0.8713, 0.8742]	[0.8608, 0.8446, 0.8717]
4	[0.88628, 0.8842, 0.8872]	[0.8855000000000001, 0.883, 0.8889]	[0.8829, 0.8816, 0.8856]	[0.87686, 0.8713, 0.8802]
8	[0.8883600000000001, 0.8858, 0.8921]	[0.8889400000000001, 0.8863, 0.8912]	[0.88688, 0.8848, 0.8891]	[0.88404, 0.8828, 0.8855]
10	[0.8888999999999999, 0.8879, 0.8903]	[0.8890800000000001, 0.8878, 0.8903]	[0.88906, 0.8871, 0.8922]	[0.8862400000000001, 0.8855, 0.8872]
16	[0.8885799999999999, 0.8866, 0.8903]	[0.8889799999999999, 0.8865, 0.8905]	[0.8893600000000002, 0.8882, 0.892]	[0.88716, 0.8854, 0.8888]
64	[0.89064, 0.889, 0.8928]	[0.8905, 0.8888, 0.8918]	[0.8891600000000001, 0.8873, 0.8927]	[0.8899199999999998, 0.8871, 0.8929]
256	[0.89002, 0.8888, 0.891]	[0.89132, 0.8892, 0.8924]	[0.88942, 0.8887, 0.8905]	[0.8881399999999999, 0.887, 0.8894]

## Sheet: h
The number of neurons in X block	AP(2-HL, X=SI)(mean, min, max)	AP(2-HL, X=RI)(mean, min, max)
1	[0.24788000000000002, 0.2254, 0.2761]	[0.21754, 0.2029, 0.2496]
2	[0.29497999999999996, 0.2023, 0.4279]	[0.44886, 0.3644, 0.4936]
4	[0.54012, 0.4905, 0.5787]	[0.6994400000000001, 0.677, 0.7286]
8	[0.7737399999999999, 0.7548, 0.8009]	[0.8297000000000001, 0.8274, 0.8359]
10	[0.8203999999999999, 0.8096, 0.826]	[0.84428, 0.8392, 0.8482]
16	[0.84622, 0.8431, 0.8509]	[0.86032, 0.859, 0.8636]
64	[0.8797600000000001, 0.8788, 0.881]	[0.87996, 0.8795, 0.8808]
256	[0.8896599999999999, 0.8873, 0.8905]	[0.8896599999999999, 0.8873, 0.8905]

## Sheet: i
The number of neurons in X block	AP(2-HL, X=SI/RI)(mean, min, max)	AP(2-HL, X=SE/RE)(mean, min, max)
0	[0.1, 0.1, 0.1]	[0.66166, 0.6563, 0.6692]
1	[0.1177, 0.1, 0.1885]	[0.8077, 0.7726, 0.8358]
2	[0.29766000000000004, 0.1817, 0.4185]	[0.86768, 0.8526, 0.8745]
4	[0.596, 0.4234, 0.6634]	[0.8805, 0.8779, 0.8845]
8	[0.69048, 0.6541, 0.7331]	[0.88652, 0.8849, 0.8889]
10	[0.79498, 0.7842, 0.8059]	[0.88604, 0.8853, 0.887]
16	[0.8729600000000002, 0.8714, 0.8753]	[0.8897200000000002, 0.8881, 0.891]
64	[0.8896599999999999, 0.8873, 0.8905]	[0.8887799999999999, 0.886, 0.8914]
256		[0.89018, 0.8884, 0.8921]
