# Supplementary material for: Adjoint propagation of error signal through modular recurrent neural networks for biologically plausible learning
Source: eLife. 2026 Feb 16;15:e108237. doi: 10.7554/eLife.108237 (PMC12959881; doi:10.7554/eLife.108237)
Supplement: Figure 5—source data 1. [file elife-108237-fig5-data1.xlsx]

## Sheet: d-f
Epoch	a-MNIST	a-FMNIST	b-MNIST	b-FMNIST	c-MNIST	c-FMNIST	b(same time)-MNIST	b(same time)-FMNIST	c(same time)-MNIST	c(same time)-FMNIST
1	0.78328	0.64606	0.79968	0.63958	0.79968	0.64616	0.78464	0.63968	0.77442	0.6291
2	0.87528	0.74532	0.88294	0.74632	0.88294	0.75834	0.87818	0.73394	0.8746	0.73392
3	0.89774	0.79854	0.90106	0.79522	0.90106	0.80242	0.89772	0.78804	0.89656	0.7867
4	0.90872	0.8168	0.9115	0.81646	0.9115	0.821	0.90768	0.81228	0.90736	0.81342
5	0.91648	0.82716	0.9185	0.82696	0.9185	0.83016	0.91454	0.82346	0.9148	0.82352
6	0.92264	0.83342	0.9238	0.83358	0.9238	0.83642	0.9208	0.83104	0.92052	0.8309
7	0.92768	0.83808	0.9282	0.83744	0.9282	0.8405	0.92498	0.83614	0.92572	0.83428
8	0.9319	0.843	0.93286	0.84216	0.93286	0.84484	0.92892	0.84112	0.92938	0.83962
9	0.93556	0.84686	0.93636	0.84586	0.93636	0.84806	0.9328	0.8446	0.93314	0.84394
10	0.93906	0.8499	0.93996	0.84864	0.93996	0.85142	0.93674	0.84742	0.93656	0.84774
11	0.94216	0.85326	0.94326	0.85136	0.94326	0.85414	0.9399	0.8489	0.93984	0.84976
12	0.94468	0.85548	0.94556	0.8537	0.94556	0.85618	0.9426	0.85302	0.94222	0.85334
13	0.94696	0.85822	0.94754	0.85516	0.94754	0.8588	0.94432	0.85432	0.9447	0.85472
14	0.94944	0.86052	0.94996	0.85876	0.94996	0.86154	0.9467	0.85758	0.94664	0.85846
15	0.9512	0.86202	0.9522	0.86054	0.9522	0.8632	0.94862	0.85778	0.94854	0.8597
16	0.95312	0.86506	0.95406	0.86338	0.95406	0.86532	0.95038	0.86118	0.94972	0.8625
17	0.95508	0.86546	0.95554	0.86316	0.95554	0.86616	0.95184	0.86226	0.9508	0.86268
18	0.95662	0.86622	0.9572	0.86562	0.9572	0.86758	0.95348	0.86322	0.95258	0.8638
19	0.95848	0.8674	0.95866	0.86456	0.95866	0.86728	0.95522	0.8646	0.95452	0.86494
20	0.95968	0.86936	0.9599	0.86784	0.9599	0.86978	0.9564	0.86592	0.95506	0.86722
21	0.96108	0.87022	0.96082	0.869	0.96082	0.87134	0.9578	0.86768	0.95662	0.86792
22	0.962	0.87146	0.9625	0.86922	0.9625	0.87102	0.95924	0.8697	0.95778	0.8687
23	0.9631	0.87262	0.96362	0.87046	0.96362	0.87282	0.96004	0.87066	0.95822	0.87008
24	0.9643	0.8726	0.964	0.87026	0.964	0.87266	0.96108	0.86974	0.95916	0.87052
25	0.96492	0.873	0.96488	0.87146	0.96488	0.87398	0.96224	0.87126	0.96008	0.87158
26	0.9655	0.87492	0.96596	0.8734	0.96596	0.87466	0.96334	0.8724	0.96078	0.873
27	0.96628	0.8749	0.96664	0.87296	0.96664	0.87498	0.96358	0.87238	0.96172	0.87368
28	0.9676	0.87668	0.96756	0.87368	0.96756	0.877	0.96442	0.8732	0.96254	0.87392
29	0.96794	0.8756	0.96782	0.87368	0.96782	0.87578	0.96504	0.87296	0.96354	0.87412
30	0.96852	0.8777	0.96878	0.87532	0.96878	0.87636	0.9659	0.87478	0.9638	0.87516
31	0.96886	0.87708	0.96866	0.87506	0.96866	0.87722	0.9659	0.8756	0.96404	0.87536
32	0.96986	0.87748	0.96922	0.87608	0.96922	0.87842	0.9665	0.87524	0.96478	0.87516
33	0.96984	0.87828	0.96996	0.87678	0.96996	0.87804	0.96696	0.87556	0.96528	0.87688
34	0.96984	0.87904	0.97026	0.8783	0.97026	0.88	0.9671	0.87736	0.96566	0.87754
35	0.97058	0.8786	0.97034	0.8775	0.97034	0.87938	0.96738	0.87634	0.96586	0.87712
36	0.97048	0.87992	0.97062	0.87792	0.97062	0.88032	0.96792	0.87764	0.96636	0.87742
37	0.97106	0.88012	0.97116	0.87986	0.97116	0.87998	0.9681	0.87896	0.96656	0.87842
38	0.97098	0.8799	0.97124	0.87982	0.97124	0.88064	0.96822	0.8785	0.96692	0.8789
39	0.971	0.88102	0.97174	0.87974	0.97174	0.88064	0.96884	0.87896	0.96666	0.87944
40	0.97172	0.87976	0.9719	0.8799	0.9719	0.88182	0.96908	0.87934	0.96788	0.87922
41	0.97186	0.88206	0.97254	0.88098	0.97254	0.88162	0.96864	0.88064	0.96768	0.88028
42	0.97216	0.88116	0.97262	0.88084	0.97262	0.8832	0.96932	0.88062	0.96774	0.88126
43	0.9725	0.88246	0.97296	0.88114	0.97296	0.88338	0.96892	0.88002	0.9679	0.88094
44	0.97198	0.88072	0.97276	0.8817	0.97276	0.8832	0.96954	0.881	0.96794	0.88112
45	0.97232	0.88038	0.97296	0.88194	0.97296	0.88324	0.96996	0.88004	0.96834	0.88026
46	0.97196	0.8823	0.97272	0.88192	0.97272	0.8836	0.97026	0.88118	0.96786	0.88062
47	0.97204	0.88236	0.97308	0.8823	0.97308	0.88358	0.96962	0.88186	0.96824	0.88128
48	0.97198	0.88352	0.97306	0.8821	0.97306	0.88406	0.97008	0.88268	0.96788	0.88126
49	0.97228	0.88278	0.973	0.88268	0.973	0.8854	0.97054	0.88156	0.96812	0.88186
50	0.97228	0.88212	0.97304	0.8833	0.97304	0.88434	0.9703	0.88178	0.96854	0.882
51	0.9723	0.88238	0.97266	0.88204	0.97266	0.88328	0.9705	0.88232	0.96824	0.8817
52	0.9723	0.8828	0.97306	0.88336	0.97306	0.88412	0.97022	0.8831	0.9686	0.88288
53	0.97234	0.88364	0.97294	0.88256	0.97294	0.8851	0.97022	0.88282	0.96868	0.8818
54	0.97238	0.8839	0.97288	0.8837	0.97288	0.88522	0.97056	0.88324	0.96886	0.88306
55	0.97238	0.88434	0.97314	0.88314	0.97314	0.88554	0.97024	0.88152	0.96928	0.88314
56	0.97216	0.88384	0.97296	0.8838	0.97296	0.88568	0.96998	0.8826	0.9689	0.88308
57	0.97216	0.88402	0.97308	0.88374	0.97308	0.88436	0.97042	0.88382	0.9689	0.88336
58	0.97218	0.88404	0.973	0.88298	0.973	0.88498	0.97068	0.88352	0.96848	0.88332
59	0.97244	0.8845	0.97282	0.88332	0.97282	0.88468	0.97016	0.8831	0.96922	0.88314
60	0.9726	0.88418	0.97256	0.8842	0.97256	0.88558	0.97086	0.88346	0.96848	0.88208
61	0.97244	0.88542	0.97292	0.88332	0.97292	0.88478	0.97058	0.8836	0.9684	0.88304
62	0.97234	0.88472	0.97288	0.8838	0.97288	0.8849	0.97074	0.88268	0.96876	0.88364
63	0.97204	0.88552	0.97282	0.8845	0.97282	0.88612	0.97082	0.88492	0.96898	0.88262
64	0.9725	0.88394	0.97286	0.88338	0.97286	0.8862	0.97082	0.88496	0.96888	0.88454
65	0.97242	0.88598	0.9728	0.88396	0.9728	0.8846	0.97092	0.88474	0.96908	0.8842
66	0.97258	0.88648	0.97258	0.88464	0.97258	0.88586	0.97058	0.88396	0.96852	0.88422
67	0.9721	0.88392	0.973	0.88356	0.973	0.88484	0.9704	0.8824	0.96804	0.8829
68	0.97216	0.88544	0.97298	0.88372	0.97298	0.88496	0.97042	0.88388	0.96844	0.88378
69	0.97216	0.88472	0.97284	0.88392	0.97284	0.88474	0.9705	0.8844	0.96846	0.8835
70	0.97272	0.88548	0.97278	0.88378	0.97278	0.88478	0.97032	0.88392	0.96864	0.88272
71	0.97284	0.88638	0.9728	0.88462	0.9728	0.88602	0.97018	0.88568	0.96822	0.8842
72	0.97244	0.88518	0.97274	0.8831	0.97274	0.88626	0.97002	0.88578	0.96836	0.88434
73	0.97226	0.88646	0.97294	0.88438	0.97294	0.88612	0.97016	0.8861	0.96796	0.88496
74	0.97264	0.88618	0.9728	0.88462	0.9728	0.8851	0.97052	0.88606	0.9683	0.88408
75	0.9724	0.88458	0.97278	0.88402	0.97278	0.88612	0.97008	0.88388	0.9691	0.883
76	0.97238	0.88486	0.97258	0.88448	0.97258	0.88626	0.9702	0.88602	0.96876	0.88534
77	0.97246	0.88632	0.97276	0.8843	0.97276	0.88508	0.97006	0.88538	0.968	0.88362
78	0.97264	0.88538	0.9727	0.88336	0.9727	0.88564	0.9703	0.8828	0.96766	0.88286
79	0.97252	0.88682	0.97292	0.8845	0.97292	0.88628	0.96996	0.88574	0.96752	0.88466
80	0.97248	0.88596	0.9727	0.88222	0.9727	0.88542	0.97006	0.88434	0.9681	0.88356
81	0.97252	0.88376	0.97272	0.88342	0.97272	0.8852	0.96988	0.8847	0.96762	0.88408
82	0.97224	0.88582	0.97302	0.88446	0.97302	0.88656	0.97012	0.88462	0.96774	0.88448
83	0.97248	0.88558	0.97316	0.88422	0.97316	0.88642	0.96964	0.88508	0.968	0.88382
84	0.97236	0.88474	0.97272	0.88396	0.97272	0.88434	0.96944	0.88436	0.96798	0.8838
85	0.97212	0.88434	0.97274	0.88404	0.97274	0.88534	0.96974	0.88524	0.96788	0.88446
86	0.97214	0.88452	0.97298	0.88352	0.97298	0.88558	0.96948	0.88424	0.96788	0.88468
87	0.97238	0.88474	0.97296	0.88362	0.97296	0.88446	0.96982	0.88608	0.9676	0.8828
88	0.97202	0.88588	0.97298	0.88424	0.97298	0.88606	0.96932	0.88456	0.96798	0.8842
89	0.972	0.88576	0.97276	0.88508	0.97276	0.88528	0.96984	0.88524	0.9678	0.88456
90	0.97206	0.88604	0.97304	0.88454	0.97304	0.88502	0.96964	0.88454	0.96774	0.88444
91	0.97164	0.88588	0.97278	0.88464	0.97278	0.8853	0.96956	0.88472	0.96814	0.88428
92	0.97188	0.88518	0.97286	0.88414	0.97286	0.88436	0.9697	0.88404	0.9678	0.88442
93	0.97152	0.88506	0.97302	0.88382	0.97302	0.885	0.96922	0.8849	0.96738	0.88446
94	0.97176	0.88398	0.97282	0.88378	0.97282	0.88508	0.96962	0.8843	0.96776	0.8839
95	0.9714	0.8842	0.97302	0.8833	0.97302	0.88398	0.9699	0.88434	0.96728	0.88452
96	0.97114	0.88468	0.97308	0.88352	0.97308	0.88468	0.96962	0.8845	0.96728	0.88382
97	0.97102	0.88576	0.97274	0.8836	0.97274	0.88352	0.96918	0.88426	0.9673	0.88338
98	0.97076	0.88346	0.9727	0.8845	0.9727	0.885	0.96922	0.8844	0.96794	0.88346
99	0.9705	0.88566	0.97268	0.88486	0.97268	0.88476	0.96932	0.8837	0.96762	0.885
100	0.97136	0.88458	0.97288	0.88348	0.97288	0.88446	0.96888	0.88288	0.96774	0.884
